# Supplementary material for: Global cost drivers and regional trade-offs for low-carbon fuels: a prospective techno-economic assessment
Source: Royal Society of Chemistry journal article supplement (doi:10.1039/d5ee05591a), 2026-01-01
Supplement: d5ee05591a2.zip [file lcox_results.xlsx]

## Sheet: LCOX_Base24
	PEM	DAC	AD	AE	ATR_CCS	B_PYR_kerosene	CLR	CuCl	HB	HTL	HTSE	HVO_diesel	HVO_kerosene	M_PYR	PTM	RWGS_FT_diesel	RWGS_FT_kerosene	RWGS_MeOH_methanol	RWGS_MeOH_DME	RWGS_MeOH_kerosene	SMR_CCS	SOEC	SR_FT_diesel	SR_FT_kerosene	ST_FT_diesel	ST_FT_kerosene	TG_CCS	TG_FT_diesel	TG_FT_kerosene
ECU	0.219974	0.438064	0.118573	0.154536	0.101442	0.297809	0.0997706		0.38802	0.24708		0.136905	0.144839	0.161105	0.452739	0.569755	0.647051	0.504857	0.712997	0.573961	0.116022	0.255648					0.0785576	0.481206	0.343686
DEU	0.194986	0.481056	0.143426	0.135184	0.113144	0.285135	0.109654		0.344991	0.237755		0.12367	0.126758	0.163698	0.428488	0.518381	0.564962	0.462519	0.594336	0.4987	0.123343	0.197949	0.332092	0.39887	0.526481	0.695002	0.115171	0.43823	0.319171
EST	0.179525	0.420467	0.118294	0.13412	0.0924828	0.240764	0.0922377		0.315171	0.179207		0.0874372	0.0908301	0.137283	0.382362	0.456059	0.493776	0.410659	0.514056	0.442812	0.0968	0.173487					0.0933286	0.318982	0.241752
MMR	0.201032	0.380604	0.122631	0.144378	0.0899866	0.285112	0.0899876		0.353819	0.225356		0.12181	0.129744	0.145464	0.406602	0.512481	0.584364	0.454871	0.646354	0.520916	0.101377	0.234404					0.0897581	0.438278	0.322316
MWI	0.176646	0.324181	0.100169	0.125586	0.084182	0.246403	0.0846293		0.311298	0.198831		0.109633	0.117056	0.135573	0.355758	0.451956	0.518822	0.400293	0.578256	0.461863	0.0940889	0.210782					0.0693529	0.390627	0.283681
HRV	0.193961	0.457667	0.125748	0.143563	0.098555	0.259674	0.0976351		0.340767	0.196917		0.0975086	0.101121	0.146422	0.414602	0.495724	0.537402	0.445721	0.56048	0.480817	0.10451	0.189179					0.0978664	0.352986	0.264677
GIN	0.179662	0.332209	0.100382	0.128406	0.0841217	0.247904	0.0845612		0.316435	0.198726		0.109145	0.116568	0.135642	0.362014	0.458592	0.525277	0.406559	0.583962	0.468026	0.0939987	0.212573					0.0690412	0.389132	0.282909
SOM	0.189784	0.354326	0.113644	0.129942	0.0963481	0.276025	0.0955369		0.335673	0.234112		0.131862	0.139796	0.153096	0.386826	0.495825	0.571784	0.437026	0.641051	0.505374	0.109601	0.232913					0.07974	0.464917	0.332722
NZL	0.175516	0.426398	0.121063	0.120025	0.0911466	0.251873	0.0862484		0.311051	0.215474		0.114407	0.117495	0.13282	0.385344	0.469255	0.514365	0.417786	0.545078	0.453136	0.103699	0.182359					0.0935013	0.400749	0.287547
LTU	0.186156	0.441267	0.11556	0.135418	0.100033	0.246761	0.0987839		0.327716	0.19385		0.0983893	0.101845	0.147489	0.400169	0.480639	0.522584	0.431158	0.547328	0.4659	0.106468	0.184413					0.086984	0.350723	0.257993
ZAF	0.145829	0.304019	0.0840184	0.105431	0.0711601	0.19499	0.0706082	0.229295	0.256918	0.154428	0.188847	0.0815579	0.0860045	0.109586	0.30327	0.373788	0.417381	0.333597	0.451112	0.372457	0.0779181	0.158135	0.207508	0.260671	0.367685	0.505795	0.0598959	0.290349	0.212285
DNK	0.183112	0.444127	0.150677	0.129793	0.104435	0.280606	0.102203		0.323301	0.223658		0.112744	0.115832	0.151929	0.398682	0.480463	0.522804	0.429811	0.548582	0.463596	0.112197	0.183341	0.328465	0.387402	0.479065	0.628397	0.128131	0.409069	0.306895
CHN	0.158901	0.359932	0.0732248	0.120888	0.0834129	0.18183	0.0845221	0.190225	0.278492	0.133157	0.151578	0.0656894	0.0690823	0.124627	0.334098	0.398184	0.431892	0.359294	0.450354	0.389181	0.0852279	0.153233	0.177627	0.218787	0.340039	0.446528	0.0461481	0.233415	0.172153
HUN	0.189214	0.437709	0.113932	0.139134	0.0986473	0.247734	0.0980813	0.153831	0.332637	0.190999	0.158282	0.0966146	0.100547	0.147228	0.402735	0.484568	0.528437	0.434914	0.555212	0.472278	0.104598	0.188902					0.0847024	0.346121	0.25594
BGR	0.191675	0.445715	0.122566	0.143358	0.0955808	0.254287	0.0952711	0.153496	0.336353	0.1891	0.152131	0.0927595	0.0965497	0.143	0.40699	0.486321	0.527525	0.437734	0.550364	0.473134	0.100668	0.186686					0.0952194	0.337886	0.255277
SRB	0.21026	0.483679	0.116798	0.156897	0.0836291	0.264005	0.0810222		0.368897	0.198954		0.0998237	0.10427	0.128733	0.444862	0.533672	0.581004	0.479796	0.608816	0.520769	0.093675	0.208004					0.0833246	0.358011	0.265057
ARE	0.1593	0.368218	0.102727	0.115774	0.0743824	0.216057	0.0720993	0.171756	0.280597	0.169241	0.154198	0.0858969	0.0891974	0.111109	0.340481	0.41059	0.448481	0.368118	0.472398	0.400072	0.0821836	0.159993	0.232358	0.281804	0.371069	0.497635	0.0789217	0.307648	0.227748
KEN	0.170378	0.324225	0.125774	0.121301	0.0818242	0.263283	0.0818975		0.300288	0.207424		0.110377	0.117035	0.130333	0.346349	0.436969	0.498339	0.387597	0.551513	0.443605	0.0911929	0.199192					0.101566	0.402598	0.301137
ETH	0.191823	0.371727	0.113337	0.132114	0.0958843	0.274153	0.0946455		0.339118	0.231579		0.129461	0.136884	0.151349	0.394188	0.501176	0.573777	0.442616	0.638224	0.507426	0.109068	0.229937					0.0791944	0.455924	0.326137
TUN	0.198373	0.385929	0.108341	0.141695	0.0903389	0.268303	0.0898256		0.34938	0.216341		0.11835	0.125773	0.144539	0.404636	0.508445	0.577653	0.45135	0.636518	0.514243	0.101912	0.229249					0.0733718	0.419836	0.303562
PER	0.165963	0.371218	0.0799352	0.125819	0.0682908	0.195003	0.067332		0.290893	0.143379		0.0712934	0.0750836	0.105018	0.347764	0.41632	0.453429	0.375164	0.475195	0.40825	0.0742476	0.162813					0.0520453	0.254494	0.188194
ITA	0.1944	0.448317	0.114671	0.144089	0.0983809	0.251167	0.0979665		0.341422	0.191038		0.0959545	0.100022	0.14752	0.412541	0.495459	0.539728	0.445137	0.56616	0.483161	0.104213	0.192911	0.266832	0.323511	0.457435	0.603349	0.0846193	0.344718	0.255832
GRL	0.1933	0.454725	0.104228	0.148148	0.0727975	0.232158	0.0707116		0.338324	0.165943		0.079126	0.0825771	0.111157	0.409524	0.483868	0.520109	0.437485	0.536119	0.468991	0.0799792	0.180611					0.0745371	0.287077	0.216976
SVK	0.189034	0.442613	0.122115	0.141038	0.0953924	0.251737	0.0949326	0.311546	0.331841	0.18805	0.220682	0.0922528	0.0958649	0.142118	0.402496	0.480585	0.520754	0.432555	0.54267	0.466798	0.100465	0.183499					0.0952762	0.335647	0.25335
KHM	0.167621	0.334423	0.100991	0.125233	0.0716587	0.22667	0.0721572		0.294022	0.168065		0.0861357	0.091792	0.114554	0.341235	0.420029	0.469995	0.375933	0.508517	0.422281	0.0782835	0.181267					0.0754316	0.315029	0.237505
BRA	0.164853	0.360155	0.0819386	0.123189	0.0708205	0.200132	0.0699638	0.200133	0.289353	0.15118	0.170624	0.0771564	0.081365	0.109404	0.344261	0.416241	0.457296	0.373865	0.484465	0.410526	0.0774384	0.167586					0.0539255	0.274563	0.201508
JOR	0.170004	0.365776	0.10668	0.123893	0.0771765	0.233039	0.0759597		0.299115	0.180981		0.0936179	0.0983434	0.119261	0.35539	0.434887	0.48228	0.388803	0.516963	0.430707	0.0855071	0.180164					0.0805637	0.337139	0.249917
KGZ	0.179048	0.356069	0.10686	0.132743	0.0764161	0.242943	0.076695		0.314243	0.182772		0.0948388	0.100994	0.12252	0.364582	0.450464	0.505449	0.402544	0.548701	0.453331	0.0842773	0.196088					0.0789354	0.345104	0.258288
UZB	0.164553	0.347159	0.0993423	0.1232	0.0703853	0.218718	0.0701291		0.288698	0.162045		0.081692	0.0864175	0.110268	0.34009	0.413798	0.457697	0.371276	0.488687	0.411206	0.0768001	0.171097					0.0745691	0.297988	0.224678
RUS	0.164691	0.354505	0.101091	0.122758	0.0519841	0.219848	0.0490019	0.153905	0.289118	0.164292	0.15314	0.0827603	0.0872069	0.0840339	0.342671	0.415926	0.458653	0.373213	0.488063	0.411584	0.0625511	0.169742					0.0764574	0.301093	0.22648
JAM	0.181551	0.387374	0.109364	0.133541	0.0787592	0.243822	0.0777142		0.319018	0.186754		0.0962848	0.10145	0.123049	0.37757	0.461625	0.511932	0.413055	0.548534	0.458019	0.0874259	0.191975					0.0810537	0.347392	0.25798
POL	0.190384	0.455251	0.121208	0.136448	0.104529	0.257276	0.102641		0.335671	0.206841		0.106369	0.109824	0.153473	0.411592	0.495982	0.540209	0.444061	0.567253	0.480093	0.112229	0.190794					0.0917689	0.377235	0.275416
NOR	0.224403	0.565463	0.135375	0.156134	0.105216	0.297386	0.0981264		0.396774	0.252888		0.133479	0.136567	0.153271	0.495448	0.596644	0.647143	0.53286	0.676734	0.571256	0.121578	0.224092					0.0976691	0.462954	0.32829
PRK	0.219583	0.414208	0.139	0.152216	0.104523	0.323742	0.103379		0.387791	0.268596		0.149031	0.157991	0.167508	0.446899	0.570029	0.655061	0.50328	0.73138	0.580044	0.119845	0.265643					0.101866	0.530243	0.383915
ARM	0.167893	0.357507	0.102044	0.124762	0.0727659	0.224498	0.0721653	0.157422	0.294789	0.168712	0.159236	0.0856941	0.0904196	0.11349	0.348435	0.424373	0.469427	0.380415	0.501378	0.420997	0.0798463	0.175148					0.0765499	0.311176	0.23327
BLR	0.260817	0.464397	0.161703	0.17829	0.123279	0.389386	0.121988		0.461102	0.328693		0.185895	0.197795	0.200468	0.524077	0.677889	0.788467	0.59618	0.891871	0.696806	0.143394	0.328307					0.115767	0.658784	0.473815
BRN	0.1532	0.347498	0.0964355	0.113788	0.0686815	0.203435	0.0672608		0.269245	0.153432		0.0761982	0.0795433	0.103616	0.324177	0.389395	0.424695	0.350081	0.446218	0.380713	0.0748739	0.151807					0.074015	0.275879	0.207254
FIN	0.198568	0.47998	0.125678	0.145696	0.101858	0.262405	0.100083	0.17861	0.349222	0.202961	0.16563	0.101271	0.104531	0.149869	0.428339	0.511103	0.552285	0.459372	0.57393	0.493057	0.108793	0.191976					0.0961788	0.362915	0.269045
BGD	0.174232	0.355302	0.107014	0.127895	0.0770412	0.239237	0.0767661		0.306187	0.183119		0.0953018	0.100958	0.121793	0.35814	0.441844	0.494466	0.394624	0.535381	0.442473	0.0851746	0.189851					0.0799894	0.3452	0.257099
PRT	0.188198	0.443222	0.126848	0.137221	0.100164	0.259321	0.0990547		0.331199	0.201261		0.101215	0.104827	0.148211	0.403516	0.485016	0.527868	0.435095	0.553468	0.470855	0.106603	0.187021					0.099882	0.364905	0.271919
GHA	0.180675	0.334566	0.105787	0.129716	0.0835331	0.253127	0.0840479		0.318067	0.200668		0.109224	0.116647	0.134934	0.363786	0.460071	0.52638	0.408152	0.584399	0.469406	0.0932377	0.212694					0.0753855	0.39182	0.287094
UGA	0.163588	0.31402	0.0781513	0.11926	0.0752012	0.20763	0.0757295		0.287667	0.1634		0.0887801	0.0949353	0.12021	0.331637	0.414444	0.469516	0.369063	0.515487	0.419899	0.0827807	0.185624					0.0482226	0.314211	0.227049
ALB	0.208776	0.471215	0.113227	0.15773	0.0801892	0.258703	0.0783518		0.365762	0.190123		0.0943723	0.0990978	0.125011	0.437997	0.525181	0.572336	0.472743	0.600174	0.514513	0.0892164	0.206378					0.0801567	0.340894	0.254616
SWZ	0.153544	0.296561	0.0849427	0.1125	0.071267	0.204721	0.0718946		0.269941	0.158043		0.084005	0.0896613	0.113369	0.311651	0.388174	0.438615	0.346089	0.480135	0.392706	0.0778393	0.172343					0.0592338	0.301765	0.22235
KAZ	0.156512	0.345256	0.0952158	0.117851	0.0671185	0.204646	0.066371		0.274575	0.150353		0.0741025	0.0778926	0.103054	0.327374	0.393733	0.430657	0.354309	0.453771	0.387291	0.0727804	0.156053					0.0722181	0.270383	0.204819
SLV	0.198583	0.414411	0.118981	0.144204	0.0866882	0.270602	0.0854538		0.349264	0.211644		0.111468	0.117624	0.136669	0.411273	0.507501	0.567214	0.45271	0.613417	0.506169	0.0973993	0.216694					0.0870501	0.400094	0.294445
KOR	0.172955	0.412771	0.109902	0.119743	0.0878946	0.238666	0.0836852	0.189016	0.306117	0.202356	0.178854	0.107587	0.110888	0.129137	0.376783	0.458806	0.503509	0.408878	0.534119	0.444682	0.0994955	0.179748					0.0815269	0.375864	0.268834
SUR	0.197921	0.398717	0.0982026	0.145776	0.0832791	0.250071	0.0830055		0.34752	0.193052		0.102711	0.10937	0.133537	0.404633	0.500207	0.561029	0.446609	0.608839	0.502308	0.092947	0.217235					0.0633182	0.365675	0.266395
LAO	0.199848	0.377648	0.12288	0.14306	0.0903398	0.285077	0.0902988		0.351856	0.226311		0.122614	0.130548	0.145861	0.404336	0.510309	0.582446	0.452708	0.644972	0.518895	0.101836	0.233979					0.0901938	0.440864	0.323891
GTM	0.178792	0.401195	0.107405	0.131997	0.0771631	0.235318	0.075362		0.314179	0.17976		0.0911051	0.0953137	0.118232	0.377005	0.455637	0.499519	0.408773	0.528073	0.447032	0.0855329	0.181455					0.0798531	0.327831	0.243516
COG	0.186116	0.352549	0.106187	0.131052	0.0893022	0.260048	0.0889966		0.328299	0.213218		0.117955	0.125378	0.142613	0.378474	0.479792	0.549028	0.42474	0.609995	0.487649	0.100631	0.220891					0.0734203	0.418137	0.301751
THA	0.157073	0.349194	0.0767321	0.115755	0.0712117	0.190063	0.0698999		0.276205	0.148081		0.0766508	0.0804409	0.108342	0.330914	0.400379	0.439542	0.359165	0.465518	0.393412	0.0780398	0.159855	0.207962	0.256849	0.428647	0.554901	0.0492513	0.269538	0.195055
NLD	0.190827	0.46859	0.133747	0.132794	0.11088	0.272372	0.107723	0.234895	0.337523	0.22717	0.202283	0.118443	0.121531	0.160586	0.418504	0.506137	0.551667	0.45177	0.580357	0.487358	0.120449	0.193497					0.105064	0.418162	0.303284
HTI	0.218101	0.405158	0.130262	0.156299	0.0959849	0.30859	0.09602		0.383857	0.244898		0.133367	0.142327	0.156462	0.438863	0.555471	0.635848	0.492496	0.70627	0.566628	0.108875	0.257523					0.0938764	0.479009	0.351224
URY	0.154401	0.34159	0.0810524	0.113784	0.0704385	0.192474	0.0692471		0.271519	0.149096		0.0767228	0.080513	0.107218	0.324893	0.39341	0.432277	0.352872	0.458311	0.386951	0.0770571	0.15757					0.0550617	0.271851	0.19855
PHL	0.152414	0.330526	0.0863035	0.114631	0.0662455	0.194285	0.0657907		0.267418	0.143608		0.0716931	0.0756253	0.102139	0.317423	0.383141	0.420629	0.344517	0.44518	0.378274	0.0716531	0.153941					0.0626385	0.259651	0.194883
LKA	0.211843	0.388348	0.129556	0.150616	0.0958468	0.305034	0.0959343		0.373158	0.244387		0.133892	0.142851	0.155981	0.425733	0.541357	0.621965	0.479261	0.693746	0.553524	0.108724	0.253586					0.094273	0.480515	0.351809
CIV	0.14673	0.30421	0.0803513	0.108636	0.0674403	0.18921	0.0673937		0.257843	0.144135		0.0745407	0.0789873	0.104848	0.302993	0.370888	0.412377	0.332138	0.443178	0.369809	0.0731326	0.155541					0.0562846	0.267449	0.197766
KWT	0.147057	0.326622	0.0901923	0.111729	0.0630323	0.190892	0.0624706		0.257828	0.137775		0.0666096	0.0700025	0.0961968	0.307794	0.368167	0.400925	0.331991	0.420128	0.361341	0.0676304	0.143664	0.20778	0.247183	0.360978	0.463168	0.0691608	0.244477	0.186998
AUT	0.172409	0.400193	0.119834	0.132134	0.0853073	0.233351	0.0859417		0.30187	0.164491		0.0767145	0.0799748	0.12733	0.364201	0.431043	0.464346	0.389685	0.479994	0.418916	0.0876272	0.16202					0.0982786	0.28716	0.224675
MYS	0.159328	0.360485	0.0744623	0.116554	0.0732123	0.189504	0.071424		0.280407	0.150512		0.0786143	0.0822265	0.11051	0.337899	0.40843	0.44753	0.366213	0.47304	0.399852	0.08063	0.161506					0.0456888	0.273722	0.19568
ZMB	0.178831	0.330081	0.100466	0.127538	0.0842801	0.247729	0.0847023		0.315043	0.199148		0.109542	0.116965	0.135805	0.360372	0.45695	0.523763	0.404959	0.582758	0.466499	0.0942058	0.212199					0.0692619	0.390404	0.283669
LBR	0.180851	0.33572	0.10105	0.129148	0.0846785	0.249473	0.0850353		0.318555	0.200294		0.11003	0.117453	0.136415	0.364817	0.461974	0.528908	0.409551	0.587723	0.471159	0.0947094	0.213769					0.0694701	0.392064	0.284846
MEX	0.163512	0.361985	0.0774362	0.122945	0.0692559	0.192846	0.0683289	0.2057	0.286848	0.144416	0.168257	0.07306	0.0769922	0.106546	0.342311	0.411818	0.450427	0.370475	0.47459	0.404866	0.0754761	0.163259	0.202414	0.24943	0.411588	0.533569	0.0492935	0.259252	0.190016
MLI	0.174043	0.317302	0.101168	0.123102	0.0843127	0.2463	0.0847561		0.306879	0.199804		0.110443	0.117865	0.135615	0.350405	0.446333	0.5134	0.394958	0.573537	0.456641	0.0942679	0.209304					0.0710012	0.393634	0.285889
BOL	0.226091	0.455163	0.12039	0.159378	0.102696	0.303168	0.10082		0.398664	0.25068		0.138469	0.146403	0.163013	0.466224	0.585028	0.662718	0.518801	0.728153	0.588128	0.117608	0.260442					0.0792333	0.486521	0.347432
SLE	0.179538	0.331624	0.0999436	0.128562	0.0836983	0.247126	0.0841965		0.316153	0.19755		0.108374	0.115797	0.135092	0.361509	0.457756	0.524213	0.405917	0.582618	0.467255	0.0934549	0.212139					0.0686493	0.38661	0.281297
FJI	0.176804	0.377132	0.11307	0.126543	0.0828635	0.248205	0.081281		0.311595	0.198034		0.104496	0.109661	0.128094	0.370047	0.456469	0.509282	0.406802	0.549993	0.453182	0.0927219	0.192546					0.0853547	0.374064	0.274671
VNM	0.163761	0.353448	0.0948712	0.120369	0.0736689	0.215173	0.0726769		0.287925	0.165778		0.0854498	0.0898965	0.113679	0.34212	0.417018	0.461119	0.373421	0.4925	0.412569	0.0810675	0.171202					0.0686957	0.306381	0.226294
NIC	0.185427	0.387225	0.088424	0.136082	0.0803911	0.228744	0.0795966		0.325839	0.178811		0.0950729	0.100729	0.12664	0.383428	0.471186	0.525113	0.421091	0.565864	0.469678	0.0894336	0.199517					0.0550398	0.335503	0.242204
CAN	0.172839	0.417649	0.127646	0.119264	0.088471	0.255098	0.0839541	0.227375	0.306044	0.21373	0.194523	0.111867	0.114955	0.129252	0.378213	0.459767	0.503527	0.409772	0.532909	0.444359	0.100271	0.178464					0.102451	0.396223	0.288398
NGA	0.169626	0.321296	0.0955603	0.121591	0.0802838	0.232824	0.0805724		0.298752	0.18594		0.101328	0.107986	0.128316	0.343888	0.433264	0.493817	0.384636	0.546041	0.440183	0.0892159	0.197431					0.066335	0.361404	0.263193
BHS	0.179639	0.384786	0.113456	0.129076	0.0829916	0.249927	0.0813764		0.316452	0.198447		0.10438	0.109545	0.128396	0.376033	0.462949	0.515694	0.412856	0.555837	0.459198	0.0928746	0.194384					0.0852374	0.37378	0.274658
TJK	0.179419	0.357372	0.10742	0.132752	0.0769382	0.244019	0.0771435		0.314963	0.184227		0.0957616	0.101917	0.123209	0.365658	0.451979	0.507235	0.403791	0.550782	0.454731	0.0849469	0.196756					0.0794003	0.348132	0.260237
BLZ	0.208274	0.431897	0.12577	0.149426	0.0925195	0.287751	0.0909232		0.366703	0.229294		0.122378	0.129036	0.145915	0.431575	0.535439	0.60087	0.476609	0.65302	0.534912	0.104782	0.231364					0.0917168	0.437307	0.319673
PNG	0.172567	0.349928	0.1053	0.12735	0.0754895	0.235742	0.0754361		0.303092	0.178784		0.0926292	0.0982855	0.119718	0.35377	0.436093	0.487937	0.389741	0.528106	0.437151	0.0831869	0.187524					0.078655	0.336412	0.251407
ESP	0.194999	0.461709	0.145352	0.138807	0.107513	0.286174	0.105549	0.204027	0.343985	0.228534	0.190677	0.116792	0.120582	0.158497	0.420831	0.509453	0.557101	0.455427	0.587889	0.49447	0.115993	0.198798	0.308099	0.372678	0.424004	0.58866	0.118656	0.42077	0.312495
JPN	0.244226	0.601837	0.171466	0.184779	0.106607	0.330671	0.104079	0.274502	0.427884	0.239574	0.21064	0.112852	0.116244	0.158571	0.525478	0.618728	0.661088	0.558914	0.676595	0.59369	0.114684	0.224921					0.140432	0.417597	0.321879
DOM	0.179028	0.390503	0.108519	0.131569	0.0781904	0.239538	0.0767863		0.314678	0.183975		0.0943739	0.0990994	0.121001	0.374797	0.456315	0.503825	0.40862	0.537144	0.450592	0.0867723	0.186529					0.0807661	0.339909	0.252218
DZA	0.162016	0.347036	0.0850565	0.120632	0.0707356	0.202874	0.0701553		0.284466	0.153581		0.0787501	0.0831967	0.109824	0.336783	0.409266	0.451828	0.367128	0.481472	0.405406	0.0773042	0.167658	0.213519	0.264776	0.403925	0.53737	0.0581271	0.281713	0.207754
TUR	0.231959	0.533249	0.132749	0.168112	0.0974347	0.302017	0.0935587		0.408094	0.23955		0.124661	0.129826	0.149494	0.493512	0.598474	0.656646	0.535458	0.695139	0.584867	0.11122	0.238529	0.322384	0.398208	0.56862	0.763677	0.094551	0.441792	0.321056
IRN	0.183215	0.370295	0.112458	0.133279	0.0815968	0.253872	0.0811429	0.24939	0.322205	0.197218	0.224964	0.103935	0.110091	0.129381	0.376272	0.466572	0.524221	0.415933	0.570288	0.468225	0.0909193	0.20301					0.0835076	0.374967	0.27754
COL	0.164519	0.366098	0.0831961	0.122352	0.0716395	0.200529	0.0703802		0.288958	0.153009		0.0780767	0.0820089	0.109658	0.345792	0.417203	0.457083	0.374728	0.482753	0.409837	0.0785359	0.165888					0.0553389	0.277003	0.202708
FLK	0.174483	0.377972	0.10781	0.127566	0.0778943	0.236666	0.0765643		0.306874	0.183085		0.0944152	0.0991496	0.120425	0.365091	0.445785	0.493408	0.398806	0.527641	0.440869	0.0864095	0.183574					0.0808673	0.339917	0.251969
SWE	0.170436	0.39954	0.103908	0.129566	0.0864745	0.21722	0.0867737	0.108223	0.29872	0.15706	0.11473	0.074939	0.078027	0.128231	0.361845	0.428561	0.461579	0.387102	0.477183	0.415618	0.0891633	0.160425					0.0795689	0.27395	0.208909
GMB	0.147377	0.289671	0.0811464	0.108827	0.068098	0.19392	0.068698		0.258959	0.147856		0.0775991	0.0827642	0.107691	0.300125	0.371485	0.417568	0.331872	0.454351	0.374448	0.0738653	0.162104					0.0567909	0.279364	0.206778
AUS	0.176742	0.430578	0.122699	0.12019	0.0926598	0.25507	0.0875475		0.313392	0.219693		0.117063	0.120151	0.134825	0.388778	0.47398	0.519867	0.421716	0.551401	0.457506	0.105639	0.184387	0.299585	0.365081	0.504115	0.6695	0.094836	0.409468	0.293168
HND	0.189137	0.410011	0.11404	0.138011	0.082717	0.25451	0.0810886		0.332612	0.19788		0.102685	0.10785	0.128503	0.395682	0.483732	0.535858	0.432508	0.573584	0.4785	0.0924816	0.19995					0.0841753	0.368557	0.271901
QAT	0.145552	0.323995	0.0888447	0.111099	0.0618418	0.187657	0.0613521		0.255078	0.134198		0.0643341	0.0676347	0.0943252	0.304547	0.363447	0.39507	0.328038	0.413026	0.356448	0.066121	0.141002					0.0681628	0.236731	0.1818
CRI	0.186864	0.413583	0.112836	0.136511	0.0817707	0.249724	0.0798337		0.328636	0.19406		0.100042	0.104768	0.125982	0.393213	0.478481	0.527589	0.428257	0.561697	0.471132	0.0913418	0.194338					0.0835079	0.358692	0.264637
BIH	0.235307	0.515056	0.126497	0.175421	0.0908466	0.297105	0.0888453		0.412604	0.22392		0.114605	0.12076	0.143793	0.49027	0.594744	0.654955	0.533389	0.695628	0.587129	0.10259	0.242627					0.0879047	0.411565	0.303932
MDA	0.190322	0.392426	0.1184	0.136478	0.0868542	0.266492	0.0856412		0.335195	0.211936		0.112807	0.118963	0.136482	0.394138	0.489326	0.549538	0.435551	0.59779	0.489291	0.0976475	0.211791					0.0879047	0.404194	0.296562
CHE	0.233118	0.59199	0.145918	0.160714	0.110634	0.315256	0.102755	0.137004	0.412536	0.270667	0.177513	0.143392	0.14648	0.160658	0.516763	0.623192	0.676263	0.555993	0.707782	0.595843	0.128506	0.233992					0.107163	0.497379	0.352471
RWA	0.156025	0.302867	0.0846152	0.115138	0.0707191	0.205117	0.0714085		0.274084	0.156575		0.0826783	0.0883346	0.112785	0.316508	0.392975	0.44299	0.350794	0.483531	0.397171	0.0771245	0.173395					0.0585037	0.297513	0.219792
FRA	0.19244	0.465506	0.153383	0.135933	0.108302	0.291288	0.105767	0.129824	0.339814	0.234009	0.154445	0.119011	0.122356	0.158101	0.418757	0.505772	0.55133	0.452082	0.579785	0.488513	0.117088	0.194358	0.336097	0.399457	0.492156	0.65287	0.128555	0.429743	0.320262
PAK	0.198209	0.385915	0.12342	0.141092	0.0910474	0.283221	0.0904377	0.201483	0.349218	0.226951	0.227523	0.122846	0.130269	0.145442	0.404706	0.509016	0.578624	0.451645	0.638045	0.514764	0.102823	0.229748					0.0910717	0.440353	0.322485
IRL	0.192535	0.465165	0.142059	0.136657	0.107304	0.27974	0.104905		0.339812	0.225034		0.114877	0.118222	0.156824	0.418378	0.504668	0.549669	0.451384	0.577373	0.487499	0.115805	0.193573					0.11538	0.412051	0.304789
LUX	0.198512	0.490566	0.14094	0.138345	0.113287	0.284415	0.109759		0.351031	0.236448		0.122847	0.125935	0.164052	0.435925	0.526419	0.572905	0.470034	0.601561	0.506163	0.123511	0.200222					0.11152	0.434461	0.315778
LVA	0.1842	0.429549	0.121437	0.136731	0.0951544	0.248768	0.0947531		0.323554	0.187292		0.0924143	0.0960264	0.141578	0.392276	0.469509	0.509783	0.422213	0.532653	0.456516	0.10018	0.180347					0.0954578	0.336014	0.253296
BWA	0.131906	0.280598	0.0735907	0.0983162	0.0621613	0.168593	0.0620353		0.231803	0.126987		0.0643244	0.0679366	0.0949783	0.27431	0.332808	0.367136	0.298824	0.390966	0.329766	0.0665399	0.135427					0.0525825	0.231286	0.172252
LBN	0.253853	0.442228	0.155063	0.175673	0.117315	0.375654	0.11688		0.44824	0.312021		0.175695	0.187594	0.192466	0.5061	0.654522	0.76214	0.576227	0.862808	0.67518	0.135758	0.319016					0.110687	0.62522	0.452042
MNG	0.174659	0.358044	0.109757	0.126577	0.0797242	0.243978	0.0790788		0.307358	0.190565		0.100229	0.105885	0.125262	0.360585	0.446334	0.500421	0.397933	0.543197	0.44661	0.0886217	0.19238					0.0825031	0.361314	0.267378
NAM	0.157657	0.323457	0.090014	0.111551	0.0786834	0.214565	0.0777767		0.278238	0.175765		0.0953652	0.10053	0.121794	0.327693	0.408328	0.459767	0.362927	0.50189	0.408531	0.0874291	0.177324					0.0627532	0.336652	0.242731
IND	0.193039	0.437333	0.0857986	0.150703	0.0684391	0.214022	0.067609	0.163217	0.337072	0.147019	0.146001	0.0696538	0.0737209	0.10731	0.402564	0.476175	0.513684	0.4312	0.53142	0.465402	0.0742806	0.181662	0.201831	0.246008	0.388756	0.504074	0.0537016	0.252109	0.190146
TZA	0.153379	0.307247	0.0842823	0.11272	0.0706704	0.201436	0.0708855		0.269622	0.155109		0.0816252	0.0867903	0.111288	0.314131	0.388239	0.435451	0.346759	0.472714	0.389973	0.0771467	0.167941					0.0587295	0.29272	0.215635
MAR	0.162799	0.356167	0.0877244	0.119687	0.0733392	0.206576	0.0721481		0.286264	0.160185		0.0828424	0.0870509	0.112542	0.341438	0.414991	0.457541	0.371829	0.487031	0.409335	0.0806847	0.168461	0.214188	0.266845	0.385732	0.522102	0.0605549	0.294467	0.215455
NER	0.179801	0.322321	0.103742	0.126435	0.0874191	0.255701	0.0878859		0.317173	0.209157		0.116533	0.124467	0.141136	0.360837	0.461828	0.533333	0.408082	0.598401	0.473913	0.0981656	0.219274					0.0720959	0.414496	0.300041
PRY	0.165961	0.369204	0.0873111	0.121172	0.0755774	0.208545	0.0739132		0.292047	0.164312		0.0855732	0.0896403	0.115172	0.350225	0.425302	0.468095	0.380889	0.49737	0.418078	0.0835708	0.171165					0.0589495	0.301918	0.21891
OMN	0.178071	0.405228	0.117419	0.124948	0.0871645	0.25176	0.0839956		0.314594	0.207469		0.10976	0.113968	0.131051	0.381293	0.467219	0.516675	0.416257	0.55271	0.457667	0.0983924	0.189467					0.089419	0.388765	0.282249
SVN	0.206951	0.497711	0.13592	0.149847	0.107481	0.281591	0.105267	0.170496	0.364399	0.221925	0.172405	0.112456	0.116069	0.158523	0.446863	0.536414	0.582396	0.480964	0.608969	0.518493	0.115929	0.204652					0.105254	0.402262	0.296809
VEN	0.273319	0.49897	0.147469	0.188584	0.125215	0.382649	0.123592		0.482751	0.3239		0.184124	0.196024	0.203563	0.551272	0.708276	0.819312	0.624114	0.921214	0.724999	0.145831	0.337575					0.0960636	0.646388	0.459595
MKD	0.212084	0.480651	0.114529	0.160146	0.0811841	0.262134	0.0791925		0.37157	0.192948		0.0958063	0.100532	0.12645	0.445472	0.533857	0.581401	0.480568	0.609194	0.522558	0.0904814	0.209239					0.0808232	0.345689	0.257865
AZE	0.167667	0.369877	0.103725	0.123429	0.0745105	0.224946	0.0731327		0.294762	0.17218		0.0875693	0.0917779	0.114283	0.352268	0.427373	0.470332	0.383081	0.499543	0.420819	0.0821699	0.172422					0.0782704	0.315907	0.235265
ZWE	0.179541	0.333097	0.10242	0.126996	0.0861553	0.251261	0.0863165		0.316563	0.20436		0.112934	0.120357	0.13825	0.362939	0.461003	0.52882	0.408134	0.589021	0.470241	0.0966133	0.214218					0.0709841	0.401512	0.29078
ISR	0.169206	0.387405	0.110262	0.120756	0.0809087	0.234589	0.0782021		0.2985	0.188838		0.0981164	0.101907	0.121393	0.361833	0.440176	0.484114	0.393305	0.514348	0.430251	0.0904538	0.175456					0.0842535	0.349275	0.255779
CZE	0.181918	0.428062	0.100247	0.136208	0.0926668	0.224403	0.0923323	0.17106	0.31929	0.168545	0.152505	0.0832959	0.086641	0.137497	0.387759	0.461732	0.499148	0.415977	0.518627	0.447806	0.097034	0.174722					0.0714836	0.297914	0.220858
CYP	0.201456	0.479432	0.129351	0.148624	0.101457	0.268537	0.100099		0.354032	0.205114		0.10196	0.105572	0.150514	0.431914	0.516236	0.559153	0.464033	0.582604	0.499829	0.108209	0.196207					0.0999919	0.367779	0.274538
SEN	0.149737	0.297709	0.0709473	0.109149	0.0710024	0.187245	0.0711915		0.263462	0.147931		0.0797643	0.0849294	0.111538	0.306728	0.380568	0.428143	0.339427	0.466499	0.382847	0.0775889	0.165999					0.0435692	0.281107	0.202577
COD	0.165134	0.318988	0.10579	0.119789	0.0766049	0.23587	0.0769324		0.290535	0.183011		0.0969254	0.103081	0.122089	0.335673	0.419735	0.475509	0.373563	0.522146	0.424795	0.0845786	0.187754					0.0802884	0.351459	0.261503
GEO	0.157539	0.331402	0.092829	0.120431	0.064582	0.203957	0.0648696		0.275816	0.145081		0.0710463	0.075493	0.101698	0.323882	0.391186	0.43056	0.352214	0.456749	0.388691	0.0694129	0.159724					0.0696693	0.262223	0.20096
IDN	0.160879	0.357773	0.0948808	0.117491	0.0739961	0.21182	0.0724331		0.283136	0.165265		0.0850237	0.0889559	0.112511	0.339566	0.412207	0.453571	0.369223	0.481814	0.40517	0.0815806	0.165658					0.0692907	0.303493	0.223287
ROU	0.205288	0.481718	0.133919	0.149529	0.105591	0.279643	0.104129	0.164966	0.361184	0.217859	0.172242	0.110395	0.114462	0.157314	0.439423	0.529205	0.576931	0.474432	0.606094	0.514409	0.113435	0.20565					0.103563	0.396728	0.294071
GUY	0.168761	0.37958	0.0816849	0.127451	0.0697756	0.198987	0.0685982		0.295909	0.147552		0.0737006	0.0774907	0.107062	0.354457	0.424506	0.462299	0.38236	0.484498	0.415833	0.0761445	0.165776					0.0532205	0.262453	0.193425
MOZ	0.181997	0.340272	0.0993264	0.128609	0.0871785	0.250111	0.0871862		0.320921	0.204632		0.113572	0.120995	0.139684	0.368654	0.467821	0.536083	0.4142	0.596459	0.476558	0.0979182	0.216582					0.0666061	0.401913	0.289405
NPL	0.16441	0.348199	0.101734	0.121546	0.0727711	0.222656	0.0721885		0.288847	0.168655		0.0861384	0.0908639	0.113328	0.341174	0.416626	0.461854	0.373122	0.494621	0.413803	0.0798677	0.173026					0.0768486	0.312512	0.233912
PAN	0.176412	0.397372	0.105966	0.130563	0.0759651	0.231385	0.0741918		0.309942	0.176016		0.0887947	0.0928618	0.116177	0.372246	0.449081	0.491575	0.403133	0.518694	0.440153	0.0840251	0.177872					0.0789264	0.319817	0.237999
ISL	0.220231	0.542166	0.130543	0.157858	0.0964972	0.286061	0.0909543		0.388178	0.232031		0.119598	0.122991	0.142753	0.47978	0.575201	0.622895	0.515391	0.649489	0.553183	0.11034	0.216614					0.0947936	0.420057	0.30309
CHL	0.153487	0.347091	0.081884	0.112624	0.0709235	0.191689	0.0693121		0.270088	0.149811		0.076923	0.0803782	0.106832	0.325381	0.392752	0.429936	0.352378	0.453899	0.38443	0.0777373	0.154756	0.203739	0.250957	0.378765	0.500215	0.0561766	0.271731	0.19796
SAU	0.173257	0.411939	0.116556	0.120693	0.0868452	0.244646	0.082826		0.306454	0.204191		0.107411	0.110756	0.127933	0.376526	0.457999	0.502372	0.408438	0.532494	0.444198	0.0981382	0.179401	0.273476	0.334645	0.441352	0.596702	0.0895858	0.37854	0.273779
YEM	0.224456	0.42749	0.139877	0.156434	0.104956	0.327057	0.103726		0.396175	0.269894		0.149226	0.158185	0.1683	0.457311	0.581447	0.666479	0.513877	0.741977	0.590641	0.12038	0.268983					0.101866	0.531041	0.384714
BEL	0.195564	0.475931	0.139188	0.136594	0.111781	0.281526	0.108752	0.209984	0.345717	0.232901	0.194535	0.121127	0.124472	0.162725	0.427289	0.517316	0.564648	0.461757	0.594917	0.49919	0.121547	0.199206					0.11032	0.429468	0.312924
USA	0.176609	0.419582	0.111564	0.131467	0.0694016	0.23156	0.0660912	0.125413	0.310229	0.174323	0.129823	0.0854411	0.088529	0.104416	0.378161	0.450139	0.486143	0.405378	0.504651	0.435582	0.0783633	0.169214	0.24045	0.287668	0.368941	0.489594	0.0860074	0.308923	0.231986
UKR	0.223971	0.425484	0.147308	0.15675	0.103762	0.333128	0.102699	0.18298	0.395152	0.271794	0.248886	0.148978	0.157937	0.166742	0.45561	0.578794	0.663189	0.511788	0.737927	0.588192	0.118848	0.267678					0.11104	0.533733	0.389944
SLB	0.183994	0.360291	0.112234	0.134214	0.0812693	0.255928	0.0813459		0.323428	0.197613		0.104524	0.111182	0.130279	0.374424	0.466552	0.526945	0.415624	0.576536	0.471081	0.0904222	0.207035					0.0830726	0.378161	0.280588
GBR	0.195296	0.475751	0.152512	0.13577	0.0950692	0.29485	0.0898042	0.215935	0.345407	0.242878	0.198461	0.125569	0.128914	0.139571	0.427251	0.517908	0.565752	0.462006	0.596744	0.499728	0.108617	0.199804					0.125918	0.449019	0.330433
SYR	0.244917	0.415422	0.149317	0.170558	0.112417	0.362666	0.112701		0.432188	0.29826		0.167717	0.179616	0.185738	0.484627	0.628169	0.733513	0.553101	0.832685	0.650768	0.129498	0.309421					0.106785	0.598854	0.434731
MNE	0.222059	0.501681	0.123219	0.16445	0.088867	0.282344	0.0862189		0.389794	0.215599		0.109993	0.115158	0.138003	0.467905	0.565137	0.619051	0.507013	0.65359	0.554015	0.100248	0.225245					0.0872433	0.393532	0.289755
BEN	0.153452	0.307693	0.0847138	0.112518	0.0710921	0.202184	0.071249		0.269815	0.156279		0.0823989	0.0875639	0.111833	0.314527	0.388957	0.436399	0.347291	0.473953	0.390635	0.0776885	0.168342					0.0591241	0.29525	0.217249
LBY	0.154158	0.339244	0.0810983	0.115379	0.0675897	0.190375	0.0667902		0.270636	0.142962		0.0721108	0.075901	0.103545	0.322737	0.389114	0.426414	0.349801	0.450422	0.382996	0.073396	0.155014					0.0558517	0.257964	0.1909
BFA	0.16858	0.3183	0.095127	0.120841	0.0799478	0.231703	0.0802881		0.296912	0.184987		0.100835	0.107493	0.127834	0.341512	0.430492	0.490911	0.382142	0.543133	0.437614	0.0887884	0.196509					0.0661039	0.359758	0.262083
PSE	0.258	0.457212	0.162029	0.175323	0.123856	0.38886	0.122501		0.456391	0.330236		0.187318	0.199218	0.201074	0.518537	0.672379	0.783415	0.590798	0.887898	0.691683	0.144148	0.327075					0.116553	0.663339	0.476547
GRC	0.202949	0.471784	0.129463	0.147835	0.10487	0.274446	0.103669		0.357055	0.214062		0.108956	0.113164	0.156674	0.433231	0.522726	0.57101	0.46846	0.601305	0.509207	0.112496	0.204731					0.098883	0.390899	0.289053
ARG	0.224353	0.425225	0.119211	0.158472	0.101615	0.304773	0.100844	0.22795	0.39545	0.250231	0.265888	0.139237	0.148197	0.164001	0.455163	0.576813	0.66	0.510657	0.733079	0.586378	0.116086	0.266097					0.0782424	0.491385	0.352407
IRQ	0.192683	0.387833	0.120321	0.137603	0.0885134	0.27273	0.08755		0.339443	0.217871		0.116887	0.123545	0.140011	0.396739	0.495446	0.559424	0.440341	0.612284	0.497824	0.0996976	0.218461					0.0892245	0.418846	0.306996
MDG	0.154324	0.299341	0.0861871	0.112476	0.0724318	0.207095	0.0728954		0.271464	0.161288		0.0860698	0.091726	0.114904	0.313953	0.391446	0.442494	0.348771	0.484684	0.395731	0.0793333	0.173804					0.0602749	0.308538	0.226707
CMR	0.171426	0.325953	0.0954637	0.123415	0.0800261	0.233347	0.0803404		0.30178	0.185262		0.100625	0.107283	0.128073	0.347492	0.436931	0.497253	0.388174	0.548869	0.443591	0.0888771	0.198312					0.0659384	0.359168	0.261877
GAB	0.18654	0.353794	0.113635	0.131323	0.0894901	0.267526	0.0891565		0.329053	0.21809		0.119838	0.127261	0.142875	0.379467	0.480983	0.550303	0.425797	0.611308	0.488753	0.100871	0.221309					0.0821064	0.427233	0.310515
SDN	0.244449	0.414015	0.134632	0.170294	0.112155	0.348165	0.112478		0.431346	0.288877		0.16413	0.176029	0.185379	0.483499	0.626782	0.732004	0.551884	0.831094	0.649483	0.129164	0.308914					0.0895634	0.581285	0.417647
EGY	0.194118	0.392725	0.0998903	0.137796	0.090286	0.255007	0.0890717		0.342183	0.209373		0.115087	0.121745	0.142358	0.400759	0.500978	0.565867	0.444942	0.619688	0.50294	0.10197	0.220835	0.265083	0.344333	0.498073	0.704529	0.0643482	0.403948	0.288469
AGO	0.16515	0.319236	0.0917567	0.119587	0.0769464	0.22264	0.077227		0.290619	0.17531		0.0943971	0.100552	0.122529	0.335905	0.420223	0.476185	0.373905	0.523067	0.425244	0.0850175	0.188052					0.0635987	0.337366	0.24666
CUB	0.23303	0.450865	0.141421	0.163857	0.105717	0.332892	0.104337		0.41093	0.272178		0.149568	0.158528	0.169693	0.475635	0.60154	0.686572	0.532525	0.760625	0.609289	0.121322	0.274861					0.101866	0.532446	0.386119

## Sheet: LCOX_Base30
	PEM	DAC	AD	AE	ATR_CCS	B_PYR_kerosene	CLR	CuCl	HB	HTL	HTSE	HVO_diesel	HVO_kerosene	M_PYR	PTM	RWGS_FT_diesel	RWGS_FT_kerosene	RWGS_MeOH_methanol	RWGS_MeOH_DME	RWGS_MeOH_kerosene	SMR_CCS	SOEC	SR_FT_diesel	SR_FT_kerosene	ST_FT_diesel	ST_FT_kerosene	TG_CCS	TG_FT_diesel	TG_FT_kerosene
ECU	0.164584	0.330773	0.107074	0.13048	0.0884082	0.243323	0.0917352		0.2966	0.191234		0.115729	0.122555	0.144973	0.342873	0.427439	0.486072	0.381801	0.543836	0.43752	0.0986572	0.217767					0.067317	0.364367	0.263482
DEU	0.147701	0.343972	0.13609	0.112303	0.106621	0.244732	0.105173		0.266026	0.203781		0.113253	0.116033	0.15251	0.324612	0.390081	0.428283	0.349451	0.460769	0.380496	0.114415	0.17132	0.29899	0.355538	0.428324	0.579647	0.109772	0.368853	0.271489
EST	0.138313	0.30813	0.111594	0.112772	0.0864676	0.205973	0.0881845		0.246301	0.150806		0.0782593	0.0812897	0.128076	0.293586	0.347078	0.377239	0.314271	0.399083	0.3414	0.0887529	0.149335					0.0887838	0.263967	0.203447
MMR	0.149213	0.287946	0.111531	0.120963	0.0773895	0.234044	0.0822647		0.26827	0.17309		0.101626	0.108453	0.130446	0.305643	0.381887	0.43586	0.341865	0.489055	0.394857	0.0846892	0.197929					0.0791375	0.330271	0.247946
MWI	0.126882	0.236915	0.0894506	0.101914	0.0723077	0.197821	0.0772939		0.228968	0.149962		0.0908444	0.0972385	0.121256	0.259261	0.328094	0.378328	0.292811	0.429638	0.342257	0.0783835	0.175262					0.0595221	0.29026	0.214475
HRV	0.15101	0.339485	0.118766	0.122319	0.0920824	0.222833	0.0933033		0.269125	0.16588		0.087358	0.0905692	0.136537	0.321751	0.380835	0.414111	0.344436	0.438534	0.373956	0.0958162	0.164217					0.0927523	0.291562	0.222101
GIN	0.134032	0.254558	0.0904806	0.108534	0.0726585	0.202205	0.0775544		0.241245	0.151046		0.0905498	0.0969439	0.122088	0.27397	0.343827	0.393906	0.307568	0.443897	0.356923	0.0788069	0.180162					0.0592312	0.289719	0.214556
SOM	0.131899	0.248294	0.101328	0.101978	0.082971	0.219947	0.0872166		0.239756	0.178251		0.110796	0.117623	0.136412	0.273544	0.351137	0.408619	0.311277	0.469645	0.366322	0.0918452	0.191894					0.0686525	0.349706	0.253407
NZL	0.134662	0.310277	0.114725	0.101693	0.0851804	0.216072	0.0822035		0.243036	0.183927		0.104478	0.107257	0.122737	0.296047	0.357747	0.394683	0.31999	0.427274	0.350294	0.095497	0.159495					0.0882704	0.334666	0.242344
LTU	0.142184	0.320313	0.108421	0.113204	0.0935734	0.209238	0.0944208		0.254276	0.16259		0.0883576	0.0914394	0.137334	0.305136	0.363531	0.397247	0.327784	0.423741	0.357155	0.0977689	0.158728					0.081922	0.288789	0.215094
ZAF	0.10923	0.223402	0.0771531	0.0877698	0.0641142	0.161354	0.0660699	0.164125	0.196129	0.12322	0.164637	0.0703111	0.0742122	0.100045	0.228659	0.279832	0.313654	0.251421	0.344825	0.28343	0.0685392	0.134355	0.180121	0.223894	0.298248	0.418159	0.0541284	0.226815	0.168411
DNK	0.138144	0.316605	0.143594	0.107095	0.0982242	0.242564	0.0979425		0.248119	0.192359		0.103085	0.105864	0.141558	0.300617	0.359991	0.394543	0.323382	0.423072	0.352291	0.103763	0.157583	0.297886	0.347683	0.388236	0.521853	0.123218	0.346531	0.263703
CHN	0.12045	0.260285	0.0667722	0.0998575	0.0776975	0.149618	0.0806814	0.136671	0.214139	0.107439	0.133117	0.0572508	0.0602813	0.1162	0.252526	0.298752	0.325461	0.271088	0.344905	0.296197	0.0776535	0.129939	0.154127	0.188377	0.272871	0.366187	0.0420626	0.184961	0.138188
HUN	0.14411	0.318913	0.106285	0.116146	0.0915405	0.20875	0.0933465	0.109496	0.257356	0.157962	0.138454	0.0856268	0.0891022	0.136629	0.306449	0.365584	0.400318	0.32998	0.427796	0.361185	0.0950923	0.161721					0.0791695	0.280895	0.210687
BGR	0.148964	0.331074	0.115466	0.121883	0.088955	0.217572	0.0908631	0.109409	0.265105	0.158154	0.133099	0.0824656	0.0858237	0.133181	0.315333	0.372965	0.405595	0.337762	0.429284	0.367366	0.0918127	0.161414					0.0900661	0.277159	0.213087
SRB	0.165783	0.367316	0.109172	0.135929	0.0760424	0.224547	0.0760762		0.294959	0.163832		0.0876755	0.0915766	0.117986	0.349994	0.414734	0.451774	0.375463	0.47912	0.409355	0.0835319	0.181406					0.0771289	0.287491	0.216268
ARE	0.11998	0.264158	0.0962439	0.0954986	0.0685265	0.182495	0.0681498	0.123236	0.214897	0.141365	0.136006	0.0768863	0.0798406	0.10202	0.256474	0.307344	0.337778	0.276906	0.362861	0.303957	0.0743208	0.136595	0.207096	0.248552	0.300125	0.412198	0.0744056	0.252718	0.189647
KEN	0.124127	0.238474	0.116072	0.0995217	0.0711701	0.218492	0.0752654		0.223746	0.162816		0.0934031	0.099152	0.117189	0.255609	0.320696	0.367087	0.286624	0.413509	0.331794	0.0770775	0.166822					0.0926997	0.310766	0.237845
ETH	0.140568	0.275821	0.10258	0.109645	0.0837371	0.223496	0.0871313		0.254499	0.179528		0.109713	0.116107	0.1362	0.293296	0.370502	0.425673	0.329665	0.48222	0.382	0.0928794	0.194393					0.0687067	0.346575	0.251127
TUN	0.140385	0.2725	0.0963209	0.112235	0.0777189	0.213729	0.0819081		0.253049	0.164144		0.0988659	0.10526	0.128721	0.289633	0.363232	0.415483	0.324478	0.467728	0.375104	0.085224	0.188819					0.0632727	0.314554	0.230739
PER	0.127597	0.274438	0.0733302	0.105867	0.0620901	0.161946	0.0632365		0.22687	0.115579		0.0618156	0.0651737	0.0962148	0.266897	0.316578	0.345682	0.287102	0.367395	0.314643	0.0660219	0.139338					0.047361	0.200718	0.150685
ITA	0.149524	0.330512	0.10703	0.121503	0.0911711	0.212198	0.0931905		0.266583	0.157716		0.084743	0.0883299	0.136953	0.316818	0.376841	0.411742	0.340625	0.438577	0.372277	0.0945809	0.165873	0.23601	0.283096	0.370109	0.498134	0.0789702	0.278881	0.210149
GRL	0.168524	0.381121	0.100743	0.141657	0.0683949	0.208945	0.0679582		0.297826	0.142571		0.0707614	0.0738399	0.105091	0.354487	0.411367	0.440178	0.375058	0.455402	0.401549	0.0739711	0.168717					0.0701307	0.23698	0.182755
SVK	0.146811	0.32776	0.115197	0.119744	0.0890182	0.215667	0.0906692	0.224992	0.261375	0.15794	0.195185	0.0823681	0.0855793	0.132501	0.311552	0.36833	0.400306	0.333483	0.423442	0.362243	0.0919315	0.158748					0.090335	0.276643	0.212357
KHM	0.127532	0.254223	0.0929372	0.106128	0.0629589	0.188813	0.0667027		0.227621	0.131575		0.0723118	0.07722	0.103825	0.261318	0.318282	0.35606	0.287268	0.389708	0.324758	0.0667964	0.154111					0.0683348	0.241242	0.186433
BRA	0.123677	0.261139	0.0745381	0.101534	0.0637789	0.164097	0.0653414	0.143073	0.220648	0.120247	0.148662	0.06642	0.0701239	0.0995867	0.258554	0.310312	0.34226	0.280445	0.368576	0.310738	0.0681086	0.141514					0.0485713	0.214193	0.159469
JOR	0.124877	0.260945	0.0983023	0.100458	0.0690345	0.192761	0.0706514		0.223882	0.145355		0.0810934	0.0852259	0.108001	0.262233	0.319138	0.355871	0.286981	0.388839	0.32142	0.0746987	0.150941					0.0742192	0.266386	0.200831
KGZ	0.143572	0.289992	0.0995434	0.119433	0.0675386	0.207067	0.0712876		0.256069	0.144594		0.0798485	0.0851747	0.112086	0.294759	0.358087	0.39958	0.323256	0.436043	0.364233	0.0724832	0.172258					0.0710291	0.264562	0.203006
UZB	0.135919	0.285478	0.0939994	0.113291	0.0638942	0.190402	0.0661212		0.241768	0.132508		0.0703746	0.0745071	0.102234	0.28184	0.336943	0.370669	0.305223	0.397502	0.337903	0.0681241	0.153356					0.0686247	0.235259	0.181681
RUS	0.136995	0.291776	0.0961113	0.113608	0.045906	0.192573	0.0452343	0.109084	0.243747	0.135876	0.132441	0.0720052	0.0759063	0.0763157	0.285616	0.340602	0.373678	0.308496	0.399524	0.340069	0.0543923	0.153123					0.0707892	0.240338	0.184904
JAM	0.133611	0.277848	0.100306	0.10853	0.0698666	0.200848	0.0719568		0.23912	0.148502		0.0826648	0.087163	0.111049	0.27902	0.339013	0.377697	0.305231	0.412009	0.341961	0.0756512	0.160592					0.0741561	0.271734	0.205436
POL	0.144877	0.328943	0.113855	0.113788	0.0978627	0.218273	0.0981278		0.259686	0.174064		0.0959174	0.0989992	0.142806	0.312949	0.374208	0.409888	0.336669	0.438885	0.367189	0.103217	0.164342					0.0864456	0.311573	0.230053
NOR	0.177863	0.42235	0.128552	0.136424	0.0987722	0.256866	0.0937361		0.319378	0.217209		0.122477	0.125256	0.142001	0.391184	0.465916	0.507491	0.418329	0.540392	0.451347	0.112649	0.199498					0.0918209	0.387729	0.276931
PRK	0.155471	0.296861	0.125314	0.121765	0.0894538	0.261363	0.0940762		0.281654	0.205896		0.125268	0.132965	0.149008	0.321419	0.40923	0.473385	0.363687	0.540189	0.425368	0.0998435	0.220356					0.0893254	0.400988	0.294937
ARM	0.138641	0.293229	0.0966358	0.114818	0.0661915	0.195548	0.0680987	0.111378	0.246851	0.13845	0.137392	0.0741709	0.0783035	0.105236	0.288624	0.345406	0.380126	0.312573	0.408018	0.345835	0.0710379	0.157184					0.0704733	0.246588	0.189053
BLR	0.192027	0.357794	0.146188	0.150706	0.104489	0.317955	0.110734		0.348165	0.250403		0.155146	0.16535	0.178704	0.393506	0.504869	0.58787	0.448015	0.675531	0.528595	0.118373	0.278612					0.0992061	0.492668	0.360111
BRN	0.122872	0.26844	0.09153	0.10048	0.0636894	0.176484	0.0639986		0.218939	0.12916		0.0678961	0.0708871	0.0963376	0.259563	0.308042	0.336185	0.278885	0.357411	0.30471	0.0681503	0.134399					0.0697724	0.226351	0.173109
FIN	0.174196	0.402538	0.12254	0.141672	0.0975326	0.238659	0.0973735	0.128251	0.30962	0.177515	0.146628	0.0923933	0.0953145	0.143321	0.372897	0.4366	0.469922	0.395794	0.491064	0.424429	0.102737	0.181358					0.091307	0.305438	0.230231
BGD	0.13307	0.27025	0.0988651	0.108984	0.0681769	0.200155	0.0711982		0.238064	0.145054		0.0810183	0.0859266	0.110608	0.275414	0.33612	0.376185	0.302655	0.41238	0.341483	0.0734166	0.16239					0.0725883	0.267191	0.203276
PRT	0.143586	0.322	0.119505	0.114645	0.093462	0.221083	0.0945466		0.256708	0.169211		0.0908139	0.0940251	0.137838	0.307434	0.366493	0.400779	0.33051	0.42783	0.360622	0.097595	0.160711					0.0946334	0.30142	0.227932
GHA	0.136632	0.260712	0.0961941	0.111193	0.0722383	0.208594	0.0771736		0.245606	0.153593		0.0907513	0.0971454	0.121711	0.279018	0.348923	0.398678	0.312496	0.447794	0.361661	0.0782639	0.181447					0.0656185	0.29324	0.219366
UGA	0.125254	0.244475	0.0701265	0.102781	0.0659707	0.169704	0.0700394		0.224492	0.124419		0.073662	0.0789882	0.109124	0.256714	0.317017	0.358584	0.284917	0.397942	0.325937	0.0705474	0.1591					0.0403064	0.233069	0.171215
ALB	0.164322	0.358922	0.105387	0.136359	0.0723227	0.219119	0.0732628		0.291865	0.154791		0.0819119	0.0860444	0.114269	0.344113	0.407482	0.44401	0.369473	0.470681	0.403793	0.0787551	0.179197					0.0738393	0.270612	0.205871
SWZ	0.113947	0.220813	0.0768394	0.0934446	0.062522	0.16704	0.0664071		0.204339	0.121453		0.0701262	0.0750345	0.102529	0.2335	0.288651	0.326839	0.259414	0.363158	0.297144	0.0662842	0.14501					0.0520826	0.227335	0.170898
KAZ	0.132345	0.2861	0.0912144	0.110315	0.0622097	0.181311	0.0633111		0.235001	0.126426		0.065221	0.0685791	0.0966266	0.276603	0.326896	0.355842	0.296811	0.376597	0.324259	0.0661588	0.142489					0.067555	0.219215	0.169816
SLV	0.146733	0.301853	0.10882	0.118454	0.0761991	0.22267	0.0787861		0.263103	0.166809		0.0950819	0.100408	0.123009	0.305911	0.374762	0.420325	0.336586	0.462341	0.379944	0.0834902	0.182135					0.0786021	0.309665	0.231896
KOR	0.133995	0.304794	0.103734	0.102653	0.0818921	0.204081	0.0796658	0.135779	0.241356	0.171269	0.158668	0.0975222	0.100477	0.119385	0.292236	0.352671	0.388969	0.315977	0.420613	0.346458	0.0912786	0.157692					0.0762305	0.310615	0.224187
SUR	0.145973	0.292384	0.0876995	0.119743	0.0722543	0.201615	0.0760721		0.261257	0.147193		0.0855957	0.0913445	0.119746	0.300553	0.368781	0.4147	0.33172	0.457102	0.376614	0.0783867	0.181803					0.0545143	0.273744	0.202701
LAO	0.145494	0.278902	0.111288	0.117389	0.0774888	0.232216	0.0823739		0.261936	0.173246		0.102289	0.109115	0.130363	0.298145	0.374024	0.428216	0.334413	0.482299	0.387533	0.0848275	0.195635					0.0795441	0.332055	0.24886
GTM	0.137306	0.297448	0.100136	0.111575	0.0700609	0.198583	0.0707107		0.245109	0.147372		0.0799127	0.0836166	0.108139	0.289658	0.346716	0.381098	0.313065	0.40895	0.344782	0.0760563	0.155942					0.074175	0.263103	0.198684
COG	0.139544	0.270432	0.0962125	0.111451	0.0776898	0.213234	0.081888		0.251608	0.164047		0.0989226	0.105317	0.128638	0.287911	0.361396	0.413672	0.322753	0.466081	0.373393	0.0851897	0.188255					0.063318	0.314682	0.23077
THA	0.122206	0.262755	0.07073	0.0993178	0.0652173	0.158958	0.0659844		0.218255	0.120216		0.0669904	0.0703485	0.0997969	0.257663	0.308591	0.339464	0.27869	0.364618	0.307266	0.0700174	0.138718	0.180142	0.220733	0.348292	0.458855	0.0443317	0.213204	0.156127
NLD	0.143992	0.333855	0.126437	0.109798	0.104416	0.232463	0.103282	0.169477	0.259276	0.193826	0.18037	0.108208	0.110988	0.149567	0.315876	0.379608	0.416906	0.340178	0.448616	0.370694	0.111621	0.166944					0.0997845	0.350459	0.256693
HTI	0.150626	0.280871	0.115849	0.121161	0.080764	0.244813	0.0865626		0.271739	0.183562		0.110201	0.117898	0.137955	0.306832	0.388911	0.449058	0.346924	0.510658	0.406261	0.0888045	0.209374					0.0818691	0.356297	0.266208
URY	0.110024	0.232183	0.0732044	0.0885305	0.0635472	0.154897	0.0646096		0.197135	0.118842		0.066729	0.0700871	0.0970484	0.232017	0.280559	0.311176	0.252689	0.337802	0.281116	0.0679319	0.129398					0.0501761	0.214412	0.158353
PHL	0.11858	0.249985	0.0803195	0.0982185	0.0602412	0.1641	0.061896		0.211175	0.116672		0.0621568	0.0656322	0.0939285	0.247138	0.295202	0.324444	0.267344	0.347661	0.295335	0.0636736	0.132956					0.0578365	0.205994	0.157663
LKA	0.152309	0.285254	0.116594	0.122496	0.0813309	0.246623	0.0870443		0.27472	0.185055		0.111006	0.118703	0.138752	0.310558	0.393167	0.453512	0.350784	0.515152	0.410237	0.0895202	0.210966					0.0822391	0.358751	0.267871
CIV	0.117071	0.241141	0.0747876	0.0965773	0.0611293	0.160748	0.0634305		0.208955	0.115797		0.0639013	0.0678024	0.0967754	0.242946	0.293236	0.325246	0.264908	0.35254	0.295857	0.0647169	0.136674					0.0507582	0.208259	0.157069
KWT	0.110568	0.234888	0.0839738	0.0916836	0.0574743	0.160155	0.0587496		0.196771	0.11304		0.0583985	0.0614289	0.0881139	0.231038	0.274581	0.300472	0.248994	0.320206	0.273625	0.060275	0.121242	0.183291	0.216029	0.289347	0.378696	0.0651841	0.197792	0.154275
AUT	0.133924	0.29565	0.113612	0.111616	0.0798095	0.201353	0.0822365		0.237499	0.139112		0.0685094	0.0714306	0.119091	0.281448	0.32999	0.356529	0.300078	0.373737	0.324744	0.0803204	0.139486					0.0943095	0.239377	0.191188
MYS	0.126475	0.276243	0.0689986	0.102203	0.0676025	0.159922	0.0677666		0.225929	0.123416		0.0692716	0.0724828	0.102355	0.268187	0.320378	0.351434	0.289269	0.376298	0.317491	0.0730695	0.142272					0.04087	0.21788	0.157258
ZMB	0.13098	0.24707	0.0901346	0.105667	0.0725991	0.200479	0.0775216		0.236021	0.150814		0.0908387	0.0972328	0.121845	0.26774	0.337214	0.387403	0.301341	0.438023	0.35076	0.0787411	0.178152					0.0594371	0.290431	0.214828
LBR	0.13554	0.258522	0.0912265	0.109696	0.0732422	0.203949	0.0780518		0.24393	0.152577		0.0914085	0.0978026	0.122896	0.27735	0.347727	0.398021	0.311087	0.448102	0.360568	0.0795446	0.181657					0.0596314	0.292322	0.216303
MEX	0.121994	0.259428	0.0701219	0.100398	0.0625461	0.157229	0.0638758	0.147417	0.217439	0.114888	0.147068	0.0630407	0.066516	0.0969783	0.255328	0.305156	0.335363	0.276099	0.359492	0.304655	0.0665948	0.137233	0.173691	0.212562	0.329891	0.436162	0.044363	0.202626	0.15045
MLI	0.121694	0.224173	0.0899317	0.0970549	0.0721743	0.195894	0.0772101		0.220084	0.150148		0.0915194	0.0979135	0.120803	0.248657	0.316817	0.367224	0.282201	0.419578	0.331748	0.0782306	0.171817					0.0611474	0.292538	0.216066
BOL	0.16343	0.328233	0.107576	0.129116	0.0889961	0.243651	0.0922526		0.29474	0.192706		0.11694	0.123767	0.145639	0.340852	0.425635	0.484608	0.379935	0.54305	0.435852	0.0994087	0.21756					0.0679475	0.36789	0.265656
SLE	0.134326	0.255097	0.0901176	0.108986	0.0722822	0.201758	0.0772259		0.241676	0.150092		0.0898319	0.096226	0.121637	0.27436	0.344028	0.393909	0.307862	0.443565	0.357101	0.0783272	0.180009					0.0588654	0.287614	0.213234
FJI	0.13292	0.278245	0.104772	0.105869	0.0742345	0.207497	0.0757527		0.238765	0.159646		0.0906444	0.0951426	0.116431	0.280006	0.342523	0.383364	0.307327	0.420979	0.34532	0.08121	0.16411					0.07817	0.295252	0.220361
VNM	0.126224	0.266129	0.0880255	0.102741	0.0666101	0.180881	0.0681319		0.225622	0.134074		0.0740858	0.0779869	0.104085	0.264525	0.319126	0.353385	0.287825	0.382622	0.320089	0.0716598	0.147507					0.06287	0.24192	0.181774
NIC	0.136277	0.279335	0.0788905	0.110828	0.0707864	0.183986	0.0734438		0.244034	0.137985		0.0802654	0.0851737	0.114025	0.283353	0.34598	0.387168	0.311237	0.424541	0.350722	0.0767259	0.166811					0.0474893	0.254197	0.185808
CAN	0.132652	0.304135	0.121387	0.100971	0.0826035	0.220006	0.0799789	0.164001	0.239118	0.183017	0.173263	0.102176	0.104955	0.119427	0.290559	0.350493	0.386267	0.31386	0.417441	0.343484	0.0922253	0.155872					0.0973744	0.332307	0.244614
NGA	0.124765	0.239371	0.0861031	0.100762	0.0697865	0.189142	0.0740605		0.224573	0.142098		0.0845373	0.0902861	0.115507	0.256146	0.320482	0.36617	0.286807	0.411453	0.331566	0.0753154	0.165976					0.0575619	0.271043	0.20092
BHS	0.128218	0.266485	0.103751	0.101668	0.0736716	0.20408	0.075293		0.23063	0.158084		0.090238	0.0947362	0.115472	0.270152	0.331798	0.37258	0.297358	0.410822	0.335316	0.080509	0.160587					0.0780605	0.293837	0.21918
TJK	0.143738	0.290636	0.100072	0.119364	0.0680334	0.207951	0.0717162		0.256447	0.145863		0.0807207	0.0860469	0.112709	0.295368	0.35901	0.400736	0.32399	0.437519	0.365103	0.0731121	0.172814					0.071463	0.267144	0.204659
BLZ	0.153695	0.315494	0.114944	0.12299	0.0811312	0.236638	0.0837303		0.276121	0.180496		0.104434	0.110183	0.131191	0.321083	0.395483	0.445369	0.354456	0.492478	0.401672	0.0896544	0.194798					0.0823851	0.337923	0.25108
PNG	0.132198	0.267423	0.0972725	0.108827	0.0667197	0.197348	0.0699387		0.236299	0.141307		0.0784993	0.0834076	0.108751	0.272848	0.332585	0.371981	0.299724	0.407316	0.33816	0.0715657	0.16051					0.0713431	0.259717	0.198468
ESP	0.149313	0.337385	0.137816	0.116964	0.100386	0.246173	0.100784	0.146249	0.26786	0.193668	0.168237	0.105368	0.108726	0.147388	0.322292	0.386777	0.424954	0.347616	0.456813	0.380466	0.106354	0.172001	0.278947	0.333047	0.345896	0.491892	0.112764	0.349737	0.263568
JPN	0.20186	0.470212	0.165303	0.166527	0.100651	0.294488	0.100105	0.198132	0.357499	0.208612	0.186871	0.102899	0.10593	0.149203	0.430351	0.499553	0.533709	0.454275	0.551819	0.483743	0.106592	0.202912					0.135355	0.35532	0.278884
DOM	0.132174	0.279208	0.0999099	0.106968	0.0699291	0.198097	0.071383		0.236513	0.147832		0.0817619	0.0858944	0.109516	0.277538	0.33581	0.372644	0.302471	0.404653	0.33697	0.0758133	0.156428					0.0744081	0.268694	0.202735
DZA	0.120836	0.251418	0.0774749	0.0991132	0.0633821	0.166379	0.0653629		0.21581	0.121653		0.0674819	0.071383	0.0997801	0.25182	0.303883	0.336817	0.274332	0.364909	0.305822	0.0675707	0.141128	0.184048	0.22618	0.324834	0.440441	0.0524777	0.218999	0.164128
TUR	0.181521	0.403734	0.123868	0.145513	0.0882807	0.25603	0.0876465		0.324415	0.196814		0.109707	0.114205	0.136559	0.386354	0.462792	0.508246	0.416963	0.545311	0.457656	0.0989226	0.207985	0.284	0.34676	0.46409	0.634871	0.0867524	0.353742	0.260477
IRN	0.13278	0.265381	0.102373	0.107499	0.0712365	0.207242	0.0745642	0.177169	0.238338	0.153761	0.193977	0.0879293	0.0932556	0.116076	0.27487	0.339171	0.382957	0.304365	0.424459	0.346684	0.077222	0.168695					0.0752961	0.287915	0.217224
COL	0.124243	0.2661	0.0761482	0.101402	0.0650047	0.165519	0.0659962		0.221745	0.123195		0.0679077	0.071383	0.100154	0.261239	0.312789	0.34409	0.282621	0.369499	0.311817	0.0697152	0.140903					0.0502629	0.218645	0.162113
FLK	0.153757	0.332874	0.104129	0.126467	0.0720519	0.213082	0.0731058		0.273776	0.153838		0.0828188	0.0869588	0.113379	0.322488	0.384522	0.421441	0.347865	0.450292	0.382437	0.0784429	0.172249					0.0744919	0.27281	0.206654
SWE	0.131918	0.293239	0.0977823	0.109033	0.0811489	0.185367	0.0831581	0.0770924	0.234263	0.132007	0.100707	0.0670003	0.0697795	0.120021	0.278643	0.32713	0.353656	0.297116	0.371236	0.321329	0.0820609	0.138115					0.0757232	0.226675	0.175814
GMB	0.110317	0.216306	0.0737366	0.090875	0.0602051	0.159068	0.0637133		0.197517	0.114553		0.0650768	0.069575	0.0977659	0.226448	0.278024	0.31307	0.250341	0.345532	0.284943	0.0634353	0.136908					0.0503773	0.211926	0.160113
AUS	0.13458	0.310729	0.116136	0.100987	0.0865483	0.218226	0.0833915		0.243154	0.18742		0.106959	0.109738	0.12443	0.296629	0.359134	0.39674	0.320919	0.430336	0.351614	0.0972374	0.160683	0.26806	0.323504	0.411921	0.56035	0.089516	0.341986	0.246997
HND	0.141904	0.300025	0.105224	0.11456	0.0738633	0.2117	0.0753751		0.254037	0.158933		0.0888076	0.0933058	0.116469	0.298042	0.361364	0.401613	0.325219	0.436986	0.362866	0.080709	0.16953					0.0770693	0.290244	0.217709
QAT	0.109939	0.233874	0.0828289	0.0915013	0.0564942	0.157799	0.0577667		0.195477	0.110354		0.0564552	0.0594096	0.08653	0.229511	0.272063	0.297101	0.24695	0.315711	0.270842	0.0590464	0.119253					0.0643649	0.191961	0.150385
CRI	0.142498	0.306252	0.104809	0.115016	0.0737253	0.209712	0.0746148		0.254861	0.157803		0.0872788	0.0914114	0.1148	0.300573	0.362286	0.400495	0.32641	0.432974	0.361714	0.0806094	0.166485					0.0769669	0.285449	0.214013
BIH	0.184579	0.396469	0.116949	0.15231	0.0806372	0.250021	0.0824056		0.328572	0.179142		0.0981853	0.103511	0.130616	0.385172	0.460989	0.506981	0.41676	0.54388	0.460369	0.0890146	0.210409					0.0793997	0.320561	0.241085
MDA	0.151798	0.31488	0.1107	0.122635	0.077556	0.227556	0.0799328		0.27201	0.170409		0.0968753	0.102202	0.124974	0.316937	0.387175	0.433167	0.347927	0.475047	0.391536	0.0852001	0.186611					0.0793997	0.31519	0.235714
CHE	0.184919	0.442084	0.13891	0.140723	0.103985	0.273135	0.0982178	0.0979311	0.332412	0.233298	0.158598	0.13192	0.1347	0.148862	0.408359	0.487004	0.530793	0.436786	0.565904	0.4711	0.119258	0.208745					0.101021	0.417964	0.298346
RWA	0.120726	0.237325	0.0773513	0.0999268	0.0624068	0.170476	0.0662653		0.215893	0.121336		0.0690379	0.0739462	0.102762	0.247199	0.303056	0.340877	0.273046	0.375623	0.310561	0.0661158	0.149249					0.0514013	0.224435	0.169456
FRA	0.14587	0.334341	0.14595	0.112967	0.101609	0.251383	0.101212	0.0925076	0.262048	0.200429	0.136642	0.10845	0.111441	0.147115	0.317355	0.38056	0.417535	0.341693	0.448354	0.372686	0.107999	0.167543	0.304279	0.357679	0.399658	0.543127	0.123137	0.361925	0.273509
PAK	0.14555	0.285695	0.112419	0.116586	0.0789125	0.23222	0.0829124	0.141029	0.262096	0.175978	0.194201	0.103512	0.109906	0.130488	0.300773	0.375673	0.428268	0.335892	0.480239	0.386719	0.0867259	0.193212					0.0809268	0.335333	0.250146
IRL	0.146684	0.335897	0.134756	0.114156	0.1007	0.240437	0.100418		0.263266	0.191916		0.104433	0.107424	0.146032	0.318511	0.381267	0.417762	0.342614	0.447747	0.373326	0.10684	0.167241					0.110026	0.345199	0.258694
LUX	0.151733	0.353927	0.133737	0.116029	0.106833	0.244394	0.105332		0.272951	0.202655		0.112465	0.115244	0.152997	0.332913	0.398969	0.437089	0.357783	0.468842	0.388781	0.114672	0.174095					0.106132	0.365311	0.26827
LVA	0.141499	0.314627	0.114378	0.114849	0.088706	0.212327	0.0904309		0.252244	0.157003		0.0824938	0.0857051	0.131819	0.300596	0.356581	0.388648	0.322477	0.412727	0.351291	0.0915514	0.155061					0.0905045	0.27677	0.212121
BWA	0.101165	0.20922	0.0681673	0.0831672	0.0567828	0.141263	0.0585301		0.180664	0.102772		0.0558149	0.0590261	0.0875231	0.210889	0.253741	0.280689	0.22937	0.303311	0.255188	0.0593867	0.116246					0.0483104	0.183062	0.138802
LBN	0.176317	0.316193	0.137762	0.138889	0.0977767	0.298777	0.105004		0.32007	0.232838		0.14506	0.155265	0.169502	0.357943	0.463511	0.543963	0.410838	0.630236	0.489927	0.109884	0.262461					0.094465	0.462182	0.339774
MNG	0.128412	0.259893	0.100664	0.103578	0.0703298	0.201125	0.0730959		0.230515	0.150434		0.0855121	0.0904204	0.113022	0.267134	0.328591	0.369917	0.294947	0.408689	0.334513	0.0761704	0.161357					0.0749343	0.280239	0.211302
NAM	0.116182	0.235425	0.0819511	0.0918323	0.0702312	0.175686	0.0723806		0.209425	0.138686		0.081826	0.0863242	0.110534	0.243835	0.302056	0.341714	0.270236	0.380119	0.307537	0.076171	0.149755					0.0557259	0.260328	0.190148
IND	0.144976	0.313483	0.0774357	0.122877	0.0611728	0.174189	0.0627403	0.11628	0.256476	0.11613	0.126616	0.0593757	0.0629625	0.0970301	0.300813	0.352937	0.382018	0.321506	0.400919	0.349754	0.06475	0.151732	0.17371	0.210033	0.308549	0.408343	0.0488269	0.196049	0.150495
TZA	0.118278	0.237071	0.0773264	0.0971634	0.0629513	0.167733	0.0660482		0.211629	0.12178		0.0690039	0.0735021	0.101616	0.24411	0.298231	0.33425	0.268654	0.366944	0.303825	0.0669032	0.144498					0.0521865	0.223881	0.168195
MAR	0.120503	0.254502	0.0801104	0.0974453	0.0661261	0.16947	0.0673985		0.215671	0.128227		0.0718265	0.0755304	0.102324	0.253393	0.306188	0.339423	0.275897	0.36813	0.306943	0.0711047	0.141608	0.185721	0.229237	0.310306	0.429183	0.0550293	0.231635	0.171782
NER	0.124506	0.226131	0.0917476	0.0989032	0.0743978	0.202224	0.0798199		0.225511	0.156149		0.09627	0.103097	0.125362	0.253847	0.325486	0.379134	0.289449	0.435601	0.34225	0.0809627	0.179385					0.0615187	0.306496	0.225469
PRY	0.120982	0.258228	0.0793263	0.0968644	0.0682634	0.169659	0.0690433		0.216842	0.131679		0.0745893	0.0781761	0.104499	0.255979	0.309588	0.343218	0.278604	0.372508	0.309513	0.0738472	0.142786					0.0534695	0.238312	0.174641
OMN	0.131459	0.287604	0.109247	0.101755	0.0793704	0.210416	0.0788281		0.236884	0.171008		0.0974881	0.101192	0.119369	0.282879	0.344817	0.383997	0.308678	0.41985	0.343203	0.087918	0.160635					0.0831024	0.314704	0.231173
SVN	0.161771	0.369902	0.128714	0.128564	0.100708	0.24244	0.100724	0.121948	0.28913	0.188203	0.152138	0.101541	0.104752	0.147839	0.348313	0.413766	0.450747	0.373123	0.479028	0.404812	0.106754	0.178931					0.0996467	0.333914	0.249693
VEN	0.201443	0.381618	0.131505	0.158859	0.106185	0.309074	0.112148		0.364567	0.244566		0.15318	0.163384	0.181331	0.413551	0.527	0.610395	0.468437	0.697209	0.549248	0.120499	0.286183					0.0794499	0.479069	0.344941
MKD	0.167895	0.368141	0.106781	0.139278	0.0733454	0.222671	0.0741286		0.298159	0.157498		0.0832955	0.0874281	0.115737	0.351925	0.416311	0.453174	0.377524	0.479797	0.41204	0.0800447	0.182413					0.0744614	0.27486	0.208787
AZE	0.139881	0.303079	0.098935	0.114655	0.0686717	0.197727	0.0694889		0.249244	0.143889		0.0770691	0.0807729	0.106558	0.294126	0.350651	0.384239	0.317167	0.410522	0.348419	0.0742809	0.156333					0.0726979	0.254829	0.193572
ZWE	0.129863	0.245136	0.0917626	0.10384	0.074269	0.202565	0.0789781		0.234429	0.155052		0.0940003	0.100394	0.123855	0.266385	0.336726	0.38778	0.300415	0.439849	0.35034	0.0808691	0.17895					0.0610444	0.299711	0.220666
ISR	0.125465	0.274895	0.102768	0.0983896	0.0739671	0.196524	0.0735598		0.225471	0.156291		0.0873524	0.0907105	0.110837	0.269062	0.325576	0.360559	0.292288	0.391308	0.323269	0.0811378	0.148738					0.0787871	0.284214	0.210769
CZE	0.141096	0.315585	0.0936776	0.115258	0.0867607	0.189983	0.0883514	0.12269	0.251091	0.140448	0.134333	0.0742423	0.0772334	0.128422	0.299544	0.353356	0.383322	0.320147	0.404479	0.347038	0.0891252	0.151023					0.0669985	0.243442	0.182941
CYP	0.15817	0.358352	0.122403	0.127795	0.0949461	0.23126	0.0957451		0.281893	0.173386		0.0916013	0.0948125	0.140488	0.337853	0.399461	0.433803	0.361223	0.458719	0.391367	0.0994362	0.171401					0.094736	0.304414	0.230706
SEN	0.111063	0.219423	0.0632771	0.090338	0.062915	0.151005	0.0660611		0.199303	0.113474		0.0669433	0.0714415	0.10117	0.229444	0.28272	0.319051	0.254019	0.353304	0.289374	0.0668803	0.139843					0.0369846	0.21113	0.154199
COD	0.126372	0.247849	0.0977107	0.103223	0.0673164	0.19752	0.0712007		0.226655	0.143576		0.0816801	0.0870063	0.110856	0.259719	0.320951	0.363122	0.288256	0.403205	0.32963	0.0722557	0.161036					0.0722918	0.269178	0.204919
GEO	0.131806	0.276031	0.0880975	0.111634	0.058775	0.178651	0.061296		0.233674	0.118816		0.0608956	0.0647967	0.0946708	0.271574	0.322143	0.352333	0.292856	0.374691	0.32274	0.0616746	0.143981					0.064385	0.206897	0.162957
IDN	0.124948	0.269106	0.0886443	0.100834	0.0676956	0.179478	0.0683278		0.223457	0.135888		0.0747954	0.0782708	0.103533	0.26414	0.317374	0.349953	0.2862	0.377148	0.316143	0.0731362	0.143794					0.0640446	0.243586	0.181965
ROU	0.158775	0.356457	0.126133	0.12707	0.0981561	0.238927	0.0991971	0.117466	0.2837	0.182423	0.15094	0.098576	0.102163	0.146135	0.339418	0.404661	0.442538	0.364943	0.472378	0.398337	0.103437	0.178133					0.0975183	0.325355	0.244768
GUY	0.131252	0.284113	0.0752832	0.108619	0.0636449	0.166396	0.0645637		0.233405	0.119648		0.0641496	0.0675077	0.0983471	0.275168	0.326192	0.355886	0.295746	0.377917	0.323632	0.0679881	0.143089					0.0484578	0.207774	0.155393
MOZ	0.133212	0.25385	0.0888722	0.10651	0.0753726	0.201952	0.0799154		0.240358	0.155345		0.0946035	0.100998	0.125411	0.273789	0.345171	0.396608	0.30808	0.448737	0.358229	0.0822622	0.182097					0.0566153	0.299579	0.219006
NPL	0.12771	0.266168	0.0948711	0.104781	0.0654719	0.188551	0.0675413		0.228047	0.136325		0.0742903	0.0784228	0.103736	0.266037	0.321142	0.356011	0.289865	0.385787	0.323215	0.0701575	0.149527					0.0707521	0.246438	0.188306
PAN	0.132659	0.287037	0.0983218	0.107678	0.0688322	0.193448	0.0694651		0.23689	0.143855		0.0779066	0.0814935	0.105853	0.279996	0.335277	0.36865	0.302699	0.395783	0.333458	0.0745333	0.150783					0.0734806	0.256867	0.194221
ISL	0.188807	0.44223	0.12629	0.150378	0.0912464	0.256215	0.0875844		0.336759	0.201393		0.109245	0.112276	0.134367	0.408341	0.480944	0.519693	0.434418	0.546594	0.466573	0.102986	0.20199					0.0891059	0.351445	0.256715
CHL	0.10932	0.234499	0.0742893	0.0873202	0.0644503	0.154809	0.0649048		0.195981	0.120811		0.0676303	0.0707122	0.0969269	0.232125	0.279909	0.309526	0.25204	0.334942	0.279013	0.0691423	0.127237	0.176268	0.215685	0.301576	0.408539	0.0516599	0.217018	0.159645
SAU	0.130144	0.294199	0.109561	0.0996928	0.0804207	0.20725	0.0784779		0.234517	0.172106		0.0971747	0.100166	0.117506	0.283474	0.342753	0.378707	0.306994	0.410404	0.33739	0.0894114	0.154226	0.244104	0.295617	0.358984	0.497503	0.0843038	0.313093	0.228741
YEM	0.158764	0.305058	0.125942	0.124746	0.0897633	0.263619	0.0943246		0.287337	0.206773		0.1254	0.133097	0.149575	0.328274	0.416646	0.4808	0.370602	0.547104	0.432283	0.100227	0.222747					0.0893254	0.401528	0.295477
BEL	0.147897	0.340883	0.131606	0.113361	0.104936	0.240535	0.104087	0.151024	0.266137	0.198167	0.172845	0.110244	0.113235	0.151356	0.323289	0.388708	0.427209	0.348459	0.459983	0.380345	0.112225	0.171858					0.104699	0.358768	0.264272
USA	0.129821	0.29054	0.103971	0.104708	0.0632203	0.193483	0.0618099	0.0896181	0.231641	0.145616	0.114498	0.0767032	0.0794824	0.0944661	0.277165	0.328443	0.357541	0.296938	0.37925	0.322656	0.070126	0.141381	0.214614	0.254322	0.294286	0.401441	0.0818196	0.255741	0.194639
UKR	0.170896	0.334716	0.135763	0.136247	0.0897765	0.278459	0.0942613	0.126159	0.308057	0.212344	0.211045	0.125756	0.133453	0.150264	0.352912	0.442677	0.506282	0.395175	0.569929	0.456535	0.100205	0.230533					0.098572	0.407258	0.303392
SLB	0.138337	0.273017	0.102776	0.113179	0.0707786	0.2118	0.0748381		0.247939	0.153638		0.0877273	0.0934761	0.117491	0.284243	0.35072	0.396271	0.31508	0.439287	0.359758	0.0765339	0.175572					0.0743179	0.287913	0.21834
GBR	0.147216	0.339621	0.144856	0.112328	0.088165	0.253475	0.0850954	0.155365	0.265133	0.207785	0.176414	0.114589	0.11758	0.128064	0.322367	0.388211	0.427153	0.347755	0.460685	0.379899	0.0992083	0.172186					0.120238	0.37747	0.281216
SYR	0.164105	0.283879	0.131263	0.129681	0.0926075	0.283947	0.100592		0.298239	0.219308		0.137308	0.147513	0.162409	0.330324	0.431418	0.509912	0.381978	0.59514	0.459922	0.103347	0.24995					0.0908236	0.438743	0.324131
MNE	0.174178	0.381863	0.114657	0.142325	0.080059	0.238898	0.0805546		0.310323	0.175611		0.095809	0.100307	0.125948	0.366951	0.437652	0.47944	0.395518	0.512188	0.434066	0.088487	0.195827					0.0799325	0.312388	0.233724
BEN	0.118029	0.236648	0.077701	0.096752	0.0633347	0.168216	0.0663825		0.211278	0.122753		0.0697286	0.0742268	0.102078	0.243816	0.298137	0.334354	0.268458	0.367379	0.303746	0.0673918	0.144687					0.0525547	0.226008	0.169534
LBY	0.11493	0.243072	0.0742061	0.0942437	0.0612389	0.156633	0.0625757		0.205077	0.11484		0.0625685	0.0659265	0.0944558	0.240715	0.288442	0.317711	0.260775	0.341594	0.288413	0.0649798	0.130449					0.0511454	0.203754	0.153064
BFA	0.123226	0.235428	0.0855628	0.0994783	0.0694038	0.187705	0.0737377		0.221874	0.14108		0.0840455	0.0897944	0.114947	0.252814	0.316746	0.362318	0.283386	0.407663	0.328077	0.0748334	0.164643					0.0573462	0.269521	0.19986
PSE	0.173735	0.312654	0.143541	0.133775	0.10358	0.306721	0.110058		0.316757	0.247601		0.155878	0.166083	0.176561	0.355874	0.464606	0.548001	0.410255	0.639027	0.491066	0.117275	0.266068					0.0999397	0.49399	0.359862
GRC	0.155734	0.34703	0.121423	0.124681	0.0971926	0.233037	0.0985871		0.278376	0.17801		0.0968438	0.100548	0.145274	0.332273	0.397108	0.435278	0.357989	0.465946	0.391923	0.102196	0.176378					0.0927006	0.318525	0.239015
ARG	0.158167	0.302012	0.105153	0.125704	0.0864437	0.241357	0.0914466	0.159006	0.285689	0.187874	0.226262	0.115681	0.123378	0.145422	0.325246	0.411571	0.474137	0.366736	0.538178	0.427488	0.0960056	0.219355					0.0659131	0.364602	0.264877
IRQ	0.138076	0.275393	0.109302	0.11003	0.0770944	0.221807	0.0803223		0.248685	0.169771		0.0991698	0.104919	0.125315	0.287166	0.357377	0.406013	0.319604	0.453642	0.366088	0.0845692	0.18113					0.0800591	0.32167	0.239806
MDG	0.113936	0.221298	0.0779503	0.092942	0.0635941	0.168756	0.0673378		0.204523	0.124193		0.0720641	0.0769724	0.103859	0.234064	0.289853	0.328563	0.26025	0.365657	0.298285	0.067648	0.145975					0.0530543	0.233054	0.174537
CMR	0.12984	0.251808	0.0866467	0.105544	0.0698548	0.191963	0.0740884		0.233253	0.142406		0.0840016	0.0897505	0.115873	0.266487	0.331443	0.376933	0.297137	0.42115	0.34178	0.0753859	0.16929					0.0571917	0.269695	0.200365
GAB	0.140095	0.271873	0.103691	0.111882	0.0778888	0.220784	0.0820574		0.252586	0.168913		0.100797	0.107192	0.128915	0.289137	0.362804	0.415151	0.324027	0.467583	0.374709	0.0854411	0.188788					0.0719945	0.323672	0.239474
SDN	0.163657	0.282663	0.116575	0.129375	0.09235	0.269481	0.100371		0.297426	0.20999		0.133741	0.143946	0.162065	0.329275	0.430164	0.508554	0.380866	0.593694	0.458749	0.103021	0.24943					0.0736157	0.421363	0.307168
EGY	0.138345	0.276833	0.0886779	0.109534	0.0787312	0.203114	0.0817415		0.249454	0.160519		0.0971804	0.102929	0.127361	0.288608	0.359825	0.409245	0.321459	0.457996	0.368402	0.0866506	0.182787	0.223899	0.288603	0.400925	0.578934	0.0550785	0.305193	0.220205
AGO	0.12598	0.247033	0.0836023	0.102715	0.0676126	0.183974	0.0714602		0.226042	0.135674		0.079106	0.0844322	0.111202	0.259085	0.320449	0.362783	0.2877	0.403165	0.329168	0.0726338	0.161053					0.0555805	0.254731	0.189826
CUB	0.165877	0.322762	0.127298	0.131186	0.0904319	0.268494	0.0948612		0.29961	0.208668		0.125684	0.133381	0.150799	0.343081	0.432663	0.496817	0.385538	0.56204	0.44722	0.101054	0.227911					0.0893254	0.402693	0.296642

## Sheet: LCOX_2deg30
	PEM	DAC	AD	AE	ATR_CCS	B_PYR_kerosene	CLR	CuCl	HB	HTL	HTSE	HVO_diesel	HVO_kerosene	M_PYR	PTM	RWGS_FT_diesel	RWGS_FT_kerosene	RWGS_MeOH_methanol	RWGS_MeOH_DME	RWGS_MeOH_kerosene	SMR_CCS	SOEC	SR_FT_diesel	SR_FT_kerosene	ST_FT_diesel	ST_FT_kerosene	TG_CCS	TG_FT_diesel	TG_FT_kerosene
ECU	0.144258	0.282579	0.0906153	0.117549	0.078433	0.206136	0.0774581		0.262513	0.146424		0.0913047	0.0971095	0.114092	0.297872	0.341888	0.383063	0.322438	0.438994	0.36582	0.0831215	0.170522					0.0558462	0.248805	0.186697
DEU	0.118044	0.262251	0.122714	0.0905061	0.0954341	0.209343	0.094465		0.215624	0.159202		0.0973624	0.0998643	0.126344	0.258172	0.29241	0.320726	0.274539	0.360699	0.299884	0.0967504	0.133105	0.260133	0.302034	0.365664	0.485296	0.0982411	0.280877	0.213183
EST	0.112134	0.243393	0.100954	0.0922952	0.0784574	0.176986	0.0801047		0.201713	0.120435		0.0662241	0.0689289	0.107723	0.237432	0.265083	0.287278	0.251376	0.315708	0.273476	0.0760211	0.116398					0.0817374	0.201912	0.161748
MMR	0.131152	0.248929	0.0966733	0.109178	0.0690594	0.200682	0.0694729		0.23798	0.135615		0.0794416	0.0852464	0.102865	0.266747	0.306329	0.344047	0.289648	0.39435	0.330853	0.0717236	0.15417					0.0699095	0.228712	0.180207
MWI	0.11396	0.210365	0.0764303	0.0944586	0.0649483	0.169542	0.0657464		0.207475	0.116393		0.0704834	0.0759307	0.0963214	0.231209	0.267358	0.302519	0.252455	0.349882	0.290974	0.0668177	0.137398					0.0510357	0.197047	0.152502
HRV	0.124958	0.274018	0.107388	0.102389	0.0834038	0.192475	0.0844165		0.224825	0.13224		0.0738975	0.0767483	0.114442	0.265333	0.296001	0.320395	0.280543	0.351814	0.304468	0.0819922	0.129793					0.0846486	0.221729	0.17539
GIN	0.127593	0.244751	0.0787728	0.106881	0.0659481	0.178462	0.0665548		0.230951	0.11943		0.07052	0.0759673	0.0982891	0.259575	0.296835	0.33188	0.281065	0.378095	0.319512	0.0679998	0.147142					0.0508201	0.198025	0.153936
SOM	0.114993	0.208582	0.0857415	0.0919862	0.0736865	0.185634	0.0734948		0.211513	0.136015		0.0870398	0.0928446	0.106983	0.23579	0.27638	0.316701	0.259388	0.373016	0.302233	0.0774122	0.147447					0.0577357	0.238072	0.179325
NZL	0.107327	0.235048	0.10209	0.0817717	0.0749571	0.182883	0.0720202		0.196602	0.141796		0.0892632	0.0917651	0.0989059	0.23476	0.267152	0.294529	0.250521	0.333461	0.275274	0.0795797	0.123428					0.077349	0.250774	0.186776
LTU	0.114683	0.249661	0.0966197	0.0921925	0.0844301	0.177618	0.0852471		0.207481	0.127072		0.0746319	0.0773781	0.114631	0.245213	0.275491	0.300291	0.260286	0.333382	0.284152	0.0832918	0.123281					0.0732902	0.216491	0.166778
ZAF	0.0980861	0.198156	0.0684375	0.0808934	0.0581043	0.141145	0.0583506	0.156298	0.177493	0.0973302	0.14329	0.0572258	0.0606344	0.0822414	0.204279	0.231739	0.256115	0.219333	0.288239	0.244926	0.0588799	0.108995	0.152958	0.185173	0.257684	0.350064	0.0474477	0.162873	0.126074
DNK	0.109291	0.239712	0.131291	0.085315	0.0882335	0.209509	0.0883262		0.19902	0.153268		0.0889089	0.0914108	0.117803	0.236954	0.267855	0.293463	0.252049	0.328924	0.275688	0.0879912	0.121403	0.263035	0.299989	0.331252	0.436661	0.113444	0.269364	0.212325
CHN	0.0973526	0.205665	0.0575719	0.0815154	0.0710408	0.124421	0.0738022	0.130571	0.174782	0.0828756	0.11705	0.0469304	0.0496352	0.0985623	0.203776	0.227689	0.247322	0.216377	0.27193	0.236865	0.067015	0.100576	0.129587	0.15507	0.232062	0.304637	0.0366773	0.133508	0.103418
HUN	0.116962	0.250917	0.094312	0.0953006	0.082726	0.177	0.0840381	0.103029	0.211172	0.123671	0.11832	0.0714594	0.0745236	0.113805	0.247752	0.278271	0.303584	0.263323	0.336865	0.288469	0.0811478	0.125322					0.0710091	0.208538	0.162204
BGR	0.123257	0.267922	0.104323	0.102008	0.0807344	0.187813	0.0822321	0.103198	0.221378	0.126513	0.114144	0.0693221	0.0722915	0.111717	0.260126	0.289938	0.313761	0.275162	0.343988	0.299085	0.0787188	0.127198					0.0826323	0.210342	0.16826
SRB	0.138782	0.301254	0.0967103	0.115239	0.0675339	0.191938	0.0662861		0.249074	0.129068		0.0724724	0.0758811	0.0952667	0.291906	0.325262	0.352026	0.308787	0.38588	0.335883	0.0702702	0.143432					0.0688992	0.211535	0.165341
ARE	0.0990726	0.211358	0.0865	0.0799522	0.0611704	0.156948	0.0603515	0.117139	0.179401	0.111499	0.118594	0.0649328	0.0675761	0.0834983	0.210945	0.237749	0.260194	0.224663	0.290108	0.246736	0.0627594	0.107458	0.179179	0.209967	0.255532	0.343314	0.0670413	0.190171	0.147978
KEN	0.11191	0.212546	0.104093	0.0925103	0.0640596	0.192223	0.0645913		0.203423	0.130716		0.0747072	0.0796231	0.0938373	0.228885	0.263241	0.295888	0.248685	0.3397	0.284021	0.0658323	0.132148					0.0844859	0.223858	0.180152
ETH	0.12773	0.245723	0.0883371	0.103222	0.0748682	0.192866	0.0741974		0.233266	0.138849		0.0870791	0.0925264	0.108196	0.263942	0.304777	0.343602	0.286949	0.396935	0.327776	0.0788801	0.154638					0.0578444	0.238933	0.179977
TUN	0.118098	0.221056	0.0810056	0.096697	0.0688605	0.178047	0.0690839		0.215443	0.125168		0.0772011	0.0826484	0.100923	0.241473	0.279402	0.31606	0.263406	0.365962	0.302868	0.0715784	0.143352					0.0538161	0.213908	0.163478
PER	0.112301	0.239838	0.0650529	0.094735	0.0562845	0.141039	0.0563839		0.201021	0.0918035		0.0507136	0.053683	0.079855	0.234404	0.260768	0.281976	0.248158	0.308017	0.270434	0.0567026	0.114066					0.0416237	0.145918	0.114126
ITA	0.123091	0.265094	0.095172	0.101221	0.0825415	0.180901	0.0839316		0.221635	0.124114		0.0705324	0.0736868	0.114245	0.259832	0.290824	0.316193	0.275624	0.348982	0.301076	0.0808891	0.129733	0.20294	0.237669	0.316478	0.415927	0.0710022	0.20697	0.161949
GRL	0.161641	0.367601	0.0942643	0.138208	0.0630081	0.19392	0.0617861		0.286562	0.119608		0.0601212	0.0628648	0.0897668	0.339441	0.3705	0.391663	0.35406	0.414698	0.375628	0.0648104	0.150511					0.0638512	0.182383	0.146933
SVK	0.12096	0.26377	0.104182	0.099745	0.0807581	0.18608	0.0821637	0.216352	0.217392	0.126231	0.174993	0.0695148	0.0723655	0.111255	0.255938	0.285339	0.308768	0.270676	0.338641	0.293994	0.078776	0.124982					0.0828566	0.210644	0.168098
KHM	0.109743	0.216114	0.0820315	0.0930989	0.0566629	0.162537	0.057728		0.197556	0.104867		0.0572308	0.0614583	0.0836571	0.224001	0.253557	0.280277	0.240864	0.314418	0.270397	0.0569392	0.120432					0.0622111	0.172161	0.140056
BRA	0.106702	0.221992	0.0652077	0.0891572	0.0574841	0.140753	0.0576592	0.135989	0.191934	0.0942065	0.128855	0.0539549	0.0572039	0.0816393	0.222308	0.249567	0.272672	0.236916	0.302125	0.261228	0.0581292	0.113129					0.0423107	0.153328	0.118818
JOR	0.10427	0.211389	0.0870603	0.0853767	0.0615992	0.164732	0.0614747		0.188972	0.114271		0.0663035	0.0698997	0.0870405	0.217745	0.247399	0.273795	0.233883	0.308941	0.261313	0.0630911	0.117095					0.0667031	0.194088	0.152526
KGZ	0.126512	0.253883	0.0878999	0.107393	0.0608103	0.179686	0.0614889		0.227332	0.115482		0.0631442	0.0677134	0.0902354	0.258769	0.291718	0.32096	0.277258	0.358039	0.309407	0.0618904	0.13691					0.0641396	0.187925	0.151712
UZB	0.117493	0.244389	0.083985	0.099546	0.0575752	0.165361	0.0579799		0.210575	0.10635		0.0570584	0.0606547	0.0834076	0.242968	0.271703	0.295868	0.258496	0.325904	0.28452	0.0581464	0.122399					0.0625559	0.172115	0.139331
RUS	0.120224	0.253933	0.0865745	0.101431	0.0399678	0.168901	0.0373264	0.102548	0.215413	0.109565	0.112295	0.0590389	0.0624476	0.0590849	0.249947	0.278867	0.30269	0.265253	0.332261	0.290497	0.0452118	0.124103					0.0644674	0.177655	0.143034
JAM	0.112709	0.228592	0.08855	0.0932233	0.0623668	0.171816	0.0623404		0.203728	0.116943		0.0669954	0.0708888	0.0892548	0.234108	0.265259	0.292887	0.251146	0.329195	0.280245	0.0639496	0.12507					0.0665949	0.196406	0.155049
POL	0.11668	0.254943	0.101419	0.0925367	0.0880523	0.185214	0.0883436		0.211731	0.135522		0.081258	0.0840043	0.118776	0.250962	0.282793	0.309051	0.266662	0.344755	0.291446	0.0877046	0.127594					0.0768683	0.233413	0.177966
NOR	0.148005	0.338277	0.114347	0.115047	0.0868694	0.219718	0.0820831		0.268733	0.167704		0.105023	0.107524	0.114685	0.323489	0.362769	0.393588	0.341499	0.436239	0.36842	0.0939985	0.159915					0.0786669	0.289853	0.212313
PRK	0.13047	0.237751	0.106644	0.104975	0.0786979	0.218786	0.0782579		0.239548	0.157629		0.098355	0.104882	0.115292	0.266646	0.311847	0.3567	0.292919	0.419066	0.34079	0.0833607	0.165969					0.0773264	0.275511	0.21127
ARM	0.122694	0.257635	0.086851	0.103503	0.0597987	0.171723	0.0598666	0.10452	0.21996	0.111517	0.11605	0.0604956	0.0640919	0.0862022	0.254633	0.284528	0.309431	0.270567	0.340502	0.297056	0.0608442	0.127645					0.0639262	0.180943	0.145259
BLR	0.167905	0.303257	0.123431	0.136195	0.091884	0.268479	0.0908819		0.307864	0.191761		0.120443	0.129066	0.137195	0.340199	0.397824	0.455551	0.373944	0.535444	0.436229	0.0990035	0.213498					0.0842747	0.332866	0.253835
BRN	0.108606	0.234703	0.0836709	0.0904274	0.057709	0.156636	0.0573759		0.194864	0.104616		0.0572657	0.0599386	0.0803434	0.228747	0.254739	0.275461	0.242001	0.301418	0.263079	0.0585055	0.111					0.0636004	0.171861	0.136948
FIN	0.166092	0.381238	0.114668	0.138154	0.0900538	0.220538	0.0897779	0.121798	0.296354	0.146668	0.127883	0.0796188	0.0822354	0.123731	0.353576	0.388459	0.413066	0.369572	0.442544	0.392927	0.0900343	0.160759					0.0824719	0.236301	0.185143
BGD	0.114916	0.229449	0.087313	0.0960704	0.0611445	0.172511	0.0615497		0.207421	0.114946		0.0648684	0.069096	0.0889558	0.236644	0.268262	0.296679	0.254297	0.333667	0.284898	0.0623916	0.127536					0.0653643	0.191362	0.152583
PRT	0.116195	0.252027	0.107588	0.0937273	0.0843536	0.1893	0.0852614		0.210107	0.133754		0.0768336	0.0796844	0.114945	0.24783	0.27842	0.303564	0.263153	0.336996	0.28755	0.0831749	0.124852					0.0860431	0.22841	0.17912
GHA	0.131406	0.254334	0.0848112	0.110563	0.0657385	0.185845	0.0663617		0.237402	0.122768		0.0709192	0.0763665	0.0982965	0.267284	0.304659	0.339464	0.28876	0.384967	0.327055	0.0677337	0.149461					0.0573631	0.202691	0.159547
UGA	0.120611	0.239	0.060815	0.102011	0.0603901	0.150788	0.0611497		0.217174	0.098506		0.0574193	0.0619885	0.0893977	0.246497	0.27897	0.308267	0.264882	0.345854	0.297066	0.0613941	0.132703					0.0333808	0.158247	0.121815
ALB	0.137652	0.295607	0.0931307	0.115662	0.06436	0.187075	0.063722		0.246527	0.122387		0.0669738	0.0705701	0.0922052	0.287343	0.319844	0.346089	0.304135	0.378673	0.331469	0.066367	0.141212					0.0664215	0.197918	0.156953
SWZ	0.103453	0.20029	0.0672021	0.0871172	0.0567904	0.145554	0.0578595		0.186862	0.0960983		0.0551482	0.0593757	0.0834026	0.211183	0.240462	0.267485	0.228034	0.302627	0.257758	0.057112	0.116426					0.0457622	0.158254	0.124955
KAZ	0.115243	0.247242	0.0826416	0.0975086	0.0562811	0.159248	0.0563706		0.206035	0.102398		0.0541201	0.0570896	0.0800365	0.240424	0.266941	0.288031	0.254194	0.313648	0.276395	0.0566904	0.115987					0.0618942	0.164585	0.133257
SLV	0.128332	0.25898	0.0958748	0.106014	0.0680993	0.192373	0.0677279		0.232139	0.131458		0.076447	0.0810162	0.0984384	0.265838	0.301797	0.334059	0.285575	0.376711	0.319626	0.0707765	0.144152					0.0697535	0.2209	0.172805
KOR	0.113412	0.24827	0.0925751	0.0885422	0.0727653	0.175892	0.0702357	0.128871	0.206556	0.133017	0.138385	0.0828775	0.0855209	0.0972674	0.245613	0.277804	0.3046	0.26138	0.341744	0.286193	0.0768634	0.126461					0.0660439	0.230966	0.171655
SUR	0.128079	0.253293	0.0748027	0.107456	0.0647448	0.171707	0.0651212		0.231149	0.114262		0.0668905	0.0718064	0.0956154	0.262298	0.297772	0.330068	0.282303	0.372118	0.317419	0.0666237	0.143288					0.0465276	0.187285	0.144957
LAO	0.124044	0.231016	0.0957084	0.102599	0.0687776	0.196416	0.0692566		0.225795	0.134553		0.0798678	0.0856726	0.102105	0.252065	0.291164	0.329045	0.274879	0.380137	0.316186	0.0713995	0.149288					0.0702109	0.229301	0.180158
GTM	0.121093	0.25861	0.0903605	0.10034	0.063085	0.174582	0.0624074		0.217776	0.118017		0.0663556	0.0696046	0.0887603	0.254334	0.284584	0.309495	0.269973	0.341374	0.295422	0.0649217	0.127189					0.0667429	0.195243	0.153627
COG	0.132913	0.258447	0.0839148	0.110052	0.0702867	0.188286	0.0702534		0.241033	0.129207		0.0778721	0.0833194	0.103438	0.272453	0.311726	0.348401	0.29471	0.397328	0.334183	0.0732774	0.154223					0.0538496	0.216531	0.16603
THA	0.10437	0.22004	0.0614905	0.0862623	0.0586369	0.135433	0.0584277		0.188049	0.0932087		0.0549713	0.0579407	0.0819662	0.219247	0.246138	0.268659	0.233357	0.297715	0.256459	0.0595939	0.110834	0.153002	0.183035	0.30481	0.390642	0.0377432	0.152814	0.115859
NLD	0.114383	0.2529	0.113294	0.0878723	0.0935117	0.197547	0.0928308	0.161826	0.208934	0.150565	0.159436	0.0927362	0.0952381	0.123981	0.249797	0.283074	0.31072	0.265817	0.349678	0.290739	0.0944156	0.129115					0.0886887	0.265134	0.200078
HTI	0.125621	0.22502	0.0982014	0.103574	0.0712358	0.204197	0.0718813		0.229538	0.141085		0.0851351	0.0916622	0.106706	0.253299	0.295263	0.337142	0.278278	0.394229	0.324276	0.0742718	0.156602					0.071799	0.242544	0.190002
URY	0.0898326	0.183322	0.0635433	0.0733293	0.0568321	0.129866	0.0569328		0.162844	0.0915762		0.0547336	0.057703	0.0790485	0.188661	0.214072	0.236403	0.202385	0.266093	0.225367	0.0574324	0.0998311					0.0437105	0.154384	0.118174
PHL	0.102851	0.214628	0.0719043	0.0866411	0.0545397	0.142856	0.0549997		0.184564	0.0933586		0.0509786	0.0540428	0.0775981	0.213858	0.239271	0.260509	0.227495	0.287064	0.250074	0.0545827	0.107025					0.0523197	0.151577	0.121276
LKA	0.129658	0.235232	0.0993543	0.107071	0.0719608	0.207527	0.0724882		0.23659	0.142917		0.085943	0.0924701	0.107765	0.261896	0.30436	0.346386	0.28702	0.403477	0.333111	0.075145	0.159843					0.0720734	0.244802	0.19168
CIV	0.114272	0.23878	0.0681738	0.0968493	0.056448	0.147167	0.056874		0.2047	0.0947483		0.0519848	0.0553935	0.0814222	0.236653	0.264295	0.287327	0.251515	0.315812	0.276261	0.056815	0.118202					0.0449493	0.150983	0.119472
KWT	0.0899758	0.186948	0.0754426	0.0754636	0.0516598	0.137068	0.0522846		0.161711	0.0903263		0.0485552	0.05126	0.0725504	0.187704	0.210384	0.229411	0.199905	0.253377	0.22001	0.051172	0.0939931	0.16008	0.184455	0.250562	0.319951	0.0601924	0.14914	0.121438
AUT	0.108967	0.236238	0.104127	0.0916248	0.0728544	0.174946	0.0752431		0.19495	0.113576		0.0581897	0.0608063	0.101049	0.228756	0.253778	0.273352	0.241515	0.29723	0.2617	0.0692115	0.10913					0.0887392	0.187323	0.155968
MYS	0.113	0.243567	0.0605597	0.0932421	0.0611439	0.139259	0.0604484		0.203271	0.096333		0.0573371	0.0601878	0.0849476	0.238564	0.266609	0.289356	0.252859	0.318484	0.275747	0.0626502	0.117824					0.0338344	0.1566	0.116739
ZMB	0.119617	0.224634	0.0774382	0.0995983	0.0653967	0.173297	0.0661106		0.217223	0.117726		0.0705611	0.0760084	0.0971751	0.242993	0.279616	0.314744	0.264346	0.361657	0.302844	0.0673491	0.141469					0.0509728	0.197607	0.153195
LBR	0.129418	0.249383	0.0795284	0.108369	0.0664948	0.180319	0.0670168		0.234189	0.120735		0.0712922	0.0767395	0.0990106	0.263561	0.301135	0.33634	0.285155	0.382731	0.323701	0.0686617	0.148789					0.0511168	0.200051	0.155334
MEX	0.102512	0.213891	0.060741	0.0856179	0.0561969	0.132939	0.0564208	0.140517	0.184372	0.0891803	0.128405	0.0512673	0.0543315	0.0794156	0.213924	0.239982	0.261936	0.22784	0.289866	0.250871	0.056605	0.108179	0.147048	0.175787	0.286735	0.368909	0.0383815	0.14477	0.111651
MLI	0.106698	0.192058	0.0764519	0.0877745	0.0645715	0.1661	0.0654493		0.195005	0.115778		0.070996	0.0764433	0.0954462	0.216169	0.251788	0.287077	0.237311	0.335177	0.275911	0.066378	0.132337					0.0525781	0.19848	0.153432
BOL	0.138484	0.268047	0.0901338	0.112084	0.0784864	0.203124	0.0775243		0.252681	0.146175		0.0921755	0.0979803	0.113788	0.286075	0.329811	0.371238	0.310618	0.428037	0.354159	0.0832025	0.166791					0.0563137	0.25058	0.187483
SLE	0.128178	0.246202	0.0785176	0.107555	0.0656589	0.178311	0.0663049		0.231879	0.118838		0.0699044	0.0753517	0.0980049	0.260639	0.297813	0.332713	0.282083	0.378613	0.320438	0.0676454	0.147284					0.0505489	0.196543	0.153028
FJI	0.112514	0.228368	0.0925529	0.0914461	0.0661219	0.177745	0.0655586		0.204274	0.125102		0.074	0.0778934	0.0934095	0.235432	0.268075	0.297303	0.253107	0.336645	0.283214	0.0685306	0.128062					0.0695704	0.213694	0.166038
VNM	0.107934	0.223063	0.0778608	0.0894583	0.059789	0.155571	0.0597592		0.194675	0.105648		0.0605133	0.063922	0.0847306	0.22521	0.253858	0.278559	0.240605	0.310623	0.266402	0.0609077	0.116833					0.0559788	0.175527	0.137452
NIC	0.115474	0.230996	0.0665446	0.0957399	0.0631613	0.153976	0.0632757		0.208843	0.105547		0.0634916	0.0677192	0.0912288	0.23871	0.271165	0.300414	0.256709	0.338936	0.287835	0.0648501	0.129575					0.0397247	0.174648	0.132589
CAN	0.105631	0.230625	0.109107	0.0811038	0.0727659	0.187601	0.0701488	0.15661	0.193199	0.142648	0.15311	0.0875104	0.0900123	0.0963677	0.230284	0.261711	0.288225	0.245664	0.325646	0.269874	0.0769117	0.1205					0.0870124	0.251866	0.191261
NGA	0.113502	0.216477	0.0744914	0.0944694	0.0629796	0.163874	0.0636603		0.205886	0.111268		0.0662035	0.0711194	0.0927391	0.23165	0.265657	0.297782	0.251275	0.340502	0.286283	0.0645106	0.132292					0.0496863	0.186347	0.144692
BHS	0.106275	0.212614	0.0912365	0.0858572	0.0654362	0.173296	0.0649931		0.193476	0.123215		0.0735593	0.0774527	0.0922558	0.222345	0.254388	0.283572	0.239869	0.323257	0.269948	0.0677113	0.123413					0.0694892	0.212199	0.164715
TJK	0.125871	0.252296	0.0882129	0.106642	0.0611584	0.179902	0.0617894		0.226323	0.116199		0.0638766	0.0684458	0.0905814	0.257619	0.290673	0.320088	0.276163	0.357538	0.308421	0.0623168	0.13678					0.0644612	0.189692	0.152799
BLZ	0.134638	0.270336	0.100818	0.110432	0.0722958	0.203993	0.0715679		0.244095	0.141524		0.0838528	0.0887687	0.104407	0.279187	0.318024	0.353263	0.300511	0.400418	0.337481	0.0758163	0.153847					0.0724889	0.239669	0.185759
PNG	0.116382	0.233066	0.0863429	0.0978907	0.0601108	0.171637	0.0606588		0.209678	0.112789		0.0627515	0.0669791	0.087901	0.239171	0.270452	0.298372	0.256656	0.334323	0.286945	0.0611267	0.127636					0.0644412	0.186229	0.149403
ESP	0.122283	0.266147	0.124985	0.0970085	0.090346	0.21278	0.0904711	0.138716	0.221962	0.153658	0.146175	0.0896136	0.092583	0.122321	0.262538	0.296142	0.324082	0.279201	0.36214	0.305716	0.0904456	0.134542	0.24224	0.282175	0.288134	0.402428	0.10266	0.266473	0.208196
JPN	0.180746	0.417038	0.154779	0.151264	0.0918547	0.267092	0.0913409	0.189991	0.321814	0.173817	0.166445	0.0892237	0.0919284	0.126908	0.384024	0.420615	0.445774	0.400622	0.475121	0.42459	0.0921744	0.172381					0.126386	0.282404	0.230575
DOM	0.111188	0.228858	0.0885876	0.0915455	0.0624229	0.169766	0.0621559		0.200957	0.1165		0.0669099	0.0705062	0.0883899	0.232282	0.262627	0.289099	0.248599	0.323915	0.276076	0.0640768	0.122301					0.0668431	0.196036	0.154178
DZA	0.103186	0.210917	0.0677617	0.0861558	0.0570289	0.142153	0.0574111		0.185936	0.0953123		0.0545458	0.0579545	0.081369	0.214226	0.241522	0.265239	0.229125	0.295774	0.254303	0.0575541	0.111437	0.155902	0.186914	0.280515	0.369438	0.046224	0.156586	0.122377
TUR	0.15294	0.330958	0.109006	0.124513	0.0779655	0.218459	0.0755635		0.275959	0.153427		0.0906088	0.0945022	0.109097	0.323614	0.363104	0.395755	0.343524	0.438797	0.375786	0.0828662	0.164326	0.241037	0.287017	0.396519	0.528748	0.0759326	0.257349	0.196227
IRN	0.115208	0.225638	0.09001	0.0954859	0.0637656	0.17837	0.0640612	0.167431	0.208751	0.121199	0.165475	0.0701469	0.0747162	0.0928034	0.236984	0.270525	0.301469	0.255913	0.342529	0.289134	0.0655264	0.131973					0.0673027	0.204485	0.161577
COL	0.107318	0.226155	0.066985	0.0891442	0.0585586	0.142449	0.0584274		0.193118	0.0965879		0.0557321	0.0587963	0.0823388	0.224845	0.252098	0.274864	0.239189	0.303997	0.262731	0.0594726	0.113283					0.0437549	0.158008	0.121696
FLK	0.159209	0.34997	0.0979529	0.134865	0.0669876	0.202888	0.0659019		0.283895	0.129476		0.0689846	0.0725869	0.0964948	0.33265	0.367342	0.393873	0.350021	0.425514	0.377553	0.0695117	0.157525					0.066904	0.20429	0.162303
SWE	0.106504	0.23169	0.0882	0.0887593	0.0739366	0.158608	0.0760859	0.0724716	0.19093	0.105428	0.0861316	0.0566631	0.059165	0.101763	0.224696	0.249733	0.269385	0.237347	0.293804	0.257236	0.0705596	0.10771					0.0698119	0.17355	0.13994
GMB	0.100289	0.1968	0.0649595	0.0847124	0.0548465	0.139259	0.0559407		0.180798	0.091145		0.051519	0.0554123	0.0801279	0.205237	0.232731	0.257661	0.220928	0.289726	0.248328	0.0548105	0.110705					0.0445664	0.149018	0.118277
AUS	0.106222	0.232343	0.10313	0.0802775	0.0760248	0.184006	0.072939		0.194968	0.14405		0.0913952	0.0938971	0.100021	0.232988	0.26575	0.293623	0.248925	0.333568	0.273991	0.0808852	0.123593	0.230148	0.271241	0.350931	0.468239	0.0782724	0.255967	0.190015
HND	0.120407	0.248214	0.0929707	0.0990103	0.0658244	0.181501	0.0652757		0.21766	0.124953		0.0723924	0.0762858	0.0935762	0.251453	0.284388	0.313178	0.26912	0.351153	0.298951	0.068146	0.132975					0.0687545	0.210237	0.164309
QAT	0.090467	0.188976	0.0747295	0.0761915	0.050928	0.135877	0.0516058		0.162338	0.0886675		0.0470478	0.0496912	0.0715909	0.188634	0.210892	0.229333	0.200564	0.25228	0.220115	0.0502894	0.0933268					0.059598	0.145437	0.118998
CRI	0.12158	0.255254	0.0931721	0.099905	0.0657988	0.180765	0.0650118		0.219462	0.124503		0.0717954	0.0753917	0.0927902	0.255102	0.28734	0.314832	0.27205	0.350865	0.30017	0.0681663	0.131899					0.06874	0.20878	0.162907
BIH	0.158433	0.334997	0.102496	0.132868	0.0716604	0.214241	0.0706727		0.284287	0.141109		0.0790431	0.0836124	0.104285	0.329087	0.368042	0.400622	0.349596	0.441823	0.383847	0.0750376	0.16679					0.0703447	0.229273	0.179926
MDA	0.131772	0.267714	0.0973426	0.108801	0.0691703	0.195939	0.0686335		0.238253	0.134006		0.0779778	0.082547	0.0998434	0.27337	0.309937	0.342517	0.293308	0.385536	0.32756	0.0720735	0.147291					0.0703447	0.224905	0.175558
CHE	0.154249	0.354309	0.123994	0.119039	0.0913252	0.234351	0.0858789	0.091282	0.280419	0.180377	0.135823	0.113413	0.115915	0.120023	0.338314	0.379702	0.412164	0.357116	0.457489	0.385071	0.0994166	0.167698					0.0868008	0.313476	0.229473
RWA	0.116794	0.233912	0.0690951	0.0994318	0.057396	0.153684	0.0583311		0.209747	0.0982587		0.0544911	0.0587186	0.0849144	0.23877	0.268987	0.295739	0.255797	0.329458	0.28535	0.057814	0.125651					0.0452571	0.1575	0.12527
FRA	0.116989	0.256948	0.133047	0.0914375	0.0911983	0.217191	0.0909785	0.0864798	0.212946	0.159233	0.116658	0.0931632	0.0958362	0.122074	0.253346	0.286267	0.313541	0.269404	0.351286	0.294608	0.0915548	0.129955	0.267338	0.306869	0.340018	0.452951	0.112715	0.279206	0.218515
PAK	0.124282	0.236705	0.0972255	0.102023	0.0700409	0.197074	0.0700734	0.1308	0.226262	0.136775	0.160616	0.0817285	0.0871758	0.102622	0.254673	0.293397	0.33031	0.276841	0.380273	0.316463	0.0730012	0.148376					0.0713043	0.233847	0.182411
IRL	0.118095	0.25968	0.122035	0.0927919	0.0904628	0.206682	0.0903443		0.214659	0.15149		0.089379	0.0920519	0.121328	0.255273	0.287957	0.314875	0.271212	0.351874	0.296191	0.0906546	0.130068					0.0998344	0.263932	0.204641
LUX	0.122559	0.273635	0.120486	0.094642	0.0957138	0.209382	0.0946887		0.223386	0.158322		0.0966309	0.0991328	0.126939	0.267543	0.302128	0.330383	0.283982	0.369935	0.309289	0.0970792	0.136289					0.0946403	0.277651	0.210195
LVA	0.114982	0.248695	0.103197	0.094281	0.080359	0.182232	0.0818429		0.207107	0.124985		0.069572	0.0724227	0.110436	0.243518	0.272447	0.295944	0.258155	0.326352	0.281515	0.0783057	0.120742					0.0829823	0.210396	0.167584
BWA	0.0916258	0.18912	0.0614829	0.0769984	0.0519626	0.125289	0.0526573		0.164688	0.0826725		0.0459321	0.0487828	0.0734141	0.190602	0.213859	0.233558	0.203219	0.258393	0.224187	0.0515097	0.0962262					0.0432519	0.134445	0.106576
LBN	0.161399	0.286523	0.1174	0.132214	0.0868194	0.256852	0.0865654		0.295589	0.18033		0.1119	0.120523	0.131165	0.324559	0.379818	0.435654	0.357407	0.512424	0.418501	0.0928437	0.205038					0.08076	0.311342	0.239751
MNG	0.107256	0.210274	0.0881938	0.0882196	0.0626344	0.170796	0.0628534		0.19471	0.117704		0.0686608	0.0728883	0.0901269	0.221647	0.253462	0.282813	0.239511	0.322088	0.270702	0.06423	0.123765					0.0671034	0.20023	0.157769
NAM	0.103755	0.206116	0.0715349	0.0844168	0.0632353	0.151972	0.0631163		0.188666	0.107976		0.0660457	0.0699391	0.0896549	0.216177	0.247208	0.275559	0.233313	0.313842	0.262868	0.0650336	0.119937					0.0476956	0.183537	0.139334
IND	0.125939	0.271564	0.0684981	0.108113	0.055368	0.150822	0.055701	0.110114	0.224176	0.0929064	0.108749	0.0481442	0.0512985	0.0802301	0.261118	0.288295	0.309346	0.275242	0.333796	0.297975	0.0555128	0.123365	0.148789	0.175629	0.268379	0.345152	0.0436597	0.142374	0.114341
TZA	0.110202	0.221937	0.0686968	0.0929386	0.057473	0.148796	0.0581561		0.198311	0.0974865		0.0550757	0.0589691	0.0836665	0.226733	0.255795	0.281446	0.242925	0.314197	0.270779	0.0579871	0.119368					0.0459075	0.158449	0.124869
MAR	0.0992718	0.2034	0.0696164	0.0814939	0.059042	0.142568	0.0590204		0.179631	0.0991925		0.0585975	0.0618465	0.0829004	0.207813	0.235306	0.259367	0.222644	0.291129	0.247558	0.06005	0.109565	0.156054	0.188134	0.263173	0.355067	0.048149	0.166306	0.128037
NER	0.108708	0.192248	0.0773457	0.08916	0.0663935	0.170546	0.067268		0.199095	0.119748		0.0743259	0.0801307	0.0984944	0.219581	0.256926	0.294402	0.241905	0.345779	0.282958	0.0685334	0.137282					0.0524474	0.206261	0.158707
PRY	0.10054	0.208026	0.0688783	0.0818082	0.060951	0.143065	0.0605747		0.182179	0.101509		0.061204	0.0643583	0.0848267	0.211685	0.239769	0.264195	0.226618	0.296743	0.251476	0.0623928	0.111395					0.0461131	0.1711	0.129789
OMN	0.10821	0.22669	0.0968567	0.0851484	0.0702739	0.179221	0.0686127		0.197493	0.132847		0.081437	0.084686	0.0959268	0.231259	0.263712	0.292184	0.248048	0.331656	0.27574	0.0737261	0.124736					0.0733608	0.231653	0.17603
SVN	0.135016	0.299857	0.116272	0.108716	0.0908241	0.209792	0.0907389	0.115144	0.243705	0.149022	0.131276	0.0863438	0.0891946	0.12331	0.289323	0.323484	0.350627	0.30585	0.386547	0.331506	0.0910159	0.14253					0.0897594	0.253125	0.195969
VEN	0.178442	0.329898	0.108888	0.145414	0.0935578	0.260185	0.0922787		0.326219	0.185652		0.118339	0.126963	0.139715	0.362536	0.42138	0.4794	0.396624	0.559127	0.459093	0.101016	0.221777					0.0643286	0.318296	0.238115
MKD	0.141653	0.305747	0.0945303	0.119025	0.0653184	0.190762	0.0645291		0.253572	0.124725		0.0682204	0.0718167	0.0935207	0.295974	0.329067	0.35556	0.31295	0.388339	0.340441	0.0675251	0.144624					0.0668826	0.201258	0.159316
AZE	0.125258	0.269023	0.0896787	0.10469	0.0620855	0.175211	0.0615362		0.224643	0.116105		0.0639416	0.0671906	0.0879134	0.262402	0.292469	0.316792	0.277894	0.347275	0.302972	0.063691	0.129082					0.0656479	0.189551	0.150254
ZWE	0.117229	0.218714	0.0785944	0.0968012	0.0666846	0.174085	0.0672225		0.213452	0.120378		0.0732735	0.0787208	0.0984539	0.238695	0.275709	0.311477	0.260254	0.359763	0.299156	0.0689266	0.140977					0.0521642	0.204151	0.157217
ISR	0.103506	0.218366	0.091679	0.0824304	0.0657434	0.168153	0.0645199		0.188235	0.122247		0.0732734	0.0762428	0.0897977	0.220735	0.250424	0.275993	0.236048	0.31086	0.26107	0.0682647	0.11617					0.0702206	0.211126	0.162175
CZE	0.115281	0.251774	0.0831639	0.0950999	0.0787814	0.161333	0.0803452	0.116627	0.207134	0.110195	0.117074	0.0623101	0.0649831	0.108188	0.244158	0.272023	0.294097	0.258097	0.322149	0.280025	0.0764135	0.118528					0.0599495	0.181729	0.141496
CYP	0.132388	0.292902	0.110821	0.108304	0.0859625	0.200572	0.0865826		0.23809	0.138277		0.0776599	0.0805107	0.11775	0.281717	0.313796	0.338981	0.297403	0.371385	0.321825	0.085093	0.136775					0.0861191	0.231506	0.182055
SEN	0.100052	0.196362	0.0539802	0.0835451	0.0570714	0.129892	0.0578479		0.180915	0.087948		0.0527538	0.0566472	0.082582	0.205773	0.234145	0.260028	0.221841	0.293907	0.249841	0.0575251	0.112399					0.0305553	0.144303	0.109811
COD	0.121537	0.241413	0.0882093	0.102399	0.0615326	0.178178	0.0621254		0.219021	0.11674		0.0651513	0.0697206	0.0907239	0.248918	0.281896	0.311641	0.267502	0.35001	0.299968	0.0627852	0.134257					0.0650756	0.192558	0.154364
GEO	0.117214	0.245981	0.0797133	0.100857	0.0535398	0.157886	0.0543718		0.209037	0.0972547		0.0493471	0.0527558	0.0783802	0.241342	0.267975	0.289656	0.255726	0.315394	0.279622	0.0532595	0.117711					0.0594521	0.153013	0.126815
IDN	0.109485	0.231781	0.0794357	0.0901516	0.0609952	0.156786	0.0605075		0.197381	0.107825		0.0620892	0.0651534	0.085179	0.230397	0.258738	0.282452	0.245167	0.313225	0.269306	0.0624388	0.116723					0.0569218	0.179451	0.13941
ROU	0.131826	0.287503	0.113431	0.106896	0.0885628	0.205824	0.08906	0.110477	0.237932	0.144382	0.129042	0.0829722	0.0861265	0.121477	0.280471	0.314329	0.341905	0.297335	0.378265	0.324178	0.0882098	0.140443					0.0881178	0.244652	0.190943
GUY	0.11626	0.2499	0.0669221	0.0978705	0.0576852	0.145413	0.0575701		0.208097	0.0951015		0.0527878	0.0557572	0.0816585	0.243149	0.27028	0.291926	0.257163	0.318521	0.279714	0.0584003	0.117817					0.0424367	0.151299	0.117786
MOZ	0.121413	0.22932	0.075775	0.100293	0.0677467	0.17386	0.0681178		0.220834	0.120339		0.073733	0.0791803	0.0998958	0.247747	0.285404	0.321457	0.269509	0.369995	0.30859	0.0702107	0.144594					0.0475504	0.203033	0.154979
NPL	0.112308	0.231444	0.085124	0.094016	0.0590907	0.165014	0.0592968		0.202089	0.10932		0.0605677	0.064164	0.0847628	0.233048	0.262118	0.287132	0.248805	0.319121	0.275363	0.0600092	0.120267					0.0641329	0.180445	0.144323
PAN	0.112367	0.237841	0.0880003	0.0926751	0.0616055	0.167097	0.0610936		0.202494	0.114096		0.064646	0.0678003	0.0862975	0.236195	0.265158	0.289392	0.251303	0.320774	0.276041	0.0631586	0.119671					0.066248	0.190432	0.149873
ISL	0.179054	0.413335	0.116741	0.146326	0.082467	0.234347	0.078366		0.320768	0.16299		0.0939059	0.0966107	0.112343	0.38417	0.423822	0.45239	0.402097	0.488279	0.42821	0.0885057	0.177813					0.0779257	0.266954	0.201717
CHL	0.0887838	0.183796	0.0648055	0.0718567	0.0575821	0.129944	0.0573971		0.161089	0.0930684		0.0560727	0.058819	0.0791677	0.187803	0.212895	0.234654	0.201105	0.263776	0.223056	0.0583916	0.0983881	0.149372	0.178626	0.258111	0.341554	0.0450005	0.157849	0.120099
SAU	0.107471	0.232803	0.0980789	0.0836034	0.0712631	0.177803	0.0689937		0.196095	0.134038		0.0826066	0.0852795	0.0953126	0.232638	0.263992	0.29051	0.248189	0.327476	0.272916	0.0750418	0.121513	0.210009	0.248156	0.305424	0.414381	0.0743726	0.234376	0.176663
YEM	0.142734	0.268702	0.109015	0.116046	0.0798434	0.227206	0.079196		0.260724	0.160896		0.098845	0.105372	0.117335	0.292277	0.338576	0.383429	0.318812	0.444959	0.366683	0.0847242	0.174938					0.0773264	0.277521	0.213279
BEL	0.118446	0.260813	0.118203	0.0916191	0.0940042	0.205205	0.0933775	0.143557	0.216085	0.154613	0.15125	0.0942309	0.0969038	0.125279	0.257615	0.291734	0.320141	0.274157	0.359923	0.300074	0.0949735	0.133238					0.0935423	0.27149	0.206343
USA	0.10589	0.230456	0.094006	0.0862952	0.0558221	0.166476	0.054116	0.0844858	0.190919	0.115717	0.0985533	0.0652396	0.0677415	0.0763431	0.225473	0.252253	0.273814	0.238875	0.301873	0.259965	0.0586273	0.110994	0.187028	0.216588	0.249341	0.333495	0.0746708	0.195337	0.154221
UKR	0.149768	0.286384	0.118025	0.122803	0.0795409	0.238829	0.0789119	0.114695	0.272644	0.165901	0.170824	0.0992501	0.105777	0.117442	0.306535	0.353081	0.397527	0.333058	0.457809	0.380673	0.0843359	0.179285					0.0868371	0.284021	0.221381
SLB	0.119695	0.23209	0.0898092	0.100162	0.0633166	0.181551	0.0639271		0.216523	0.121041		0.0691623	0.0740782	0.0935029	0.244482	0.278947	0.310969	0.264198	0.353074	0.299142	0.0649046	0.136621					0.0665087	0.202411	0.16116
GBR	0.117452	0.25836	0.131277	0.0903944	0.0774215	0.217712	0.0742351	0.147762	0.21455	0.163511	0.154549	0.0983597	0.101033	0.102775	0.255892	0.290231	0.318966	0.272545	0.359434	0.298668	0.0825263	0.133152					0.108869	0.28885	0.222413
SYR	0.134856	0.219298	0.108604	0.109708	0.0809173	0.233131	0.0816022		0.248961	0.16581		0.104478	0.113101	0.122945	0.267521	0.319033	0.373418	0.29922	0.449258	0.359399	0.0857173	0.182784					0.0780606	0.291282	0.225404
MNE	0.146982	0.315468	0.10099	0.121856	0.070998	0.204069	0.0696145		0.264173	0.137889		0.0784564	0.0823498	0.10099	0.308222	0.344614	0.374546	0.326915	0.412863	0.357465	0.0743836	0.154645					0.070877	0.226946	0.176525
BEN	0.109654	0.220579	0.0689616	0.0922972	0.0577681	0.148977	0.0584108		0.197446	0.0980939		0.0556972	0.0595905	0.0839594	0.225747	0.254899	0.280696	0.241986	0.313761	0.269933	0.0583485	0.119254					0.0461805	0.159948	0.12579
LBY	0.0939064	0.193436	0.0647454	0.0780075	0.0548553	0.131698	0.0552245		0.169327	0.0892995		0.0511613	0.0541308	0.0771113	0.196094	0.220927	0.242257	0.209504	0.269783	0.231857	0.0550099	0.100853					0.0453286	0.147533	0.115259
BFA	0.11153	0.211486	0.0738931	0.0927752	0.0625927	0.162195	0.0633357		0.202433	0.110301		0.0657479	0.0706638	0.0921856	0.227435	0.261185	0.293224	0.246983	0.335916	0.281937	0.064044	0.130681					0.0495264	0.185093	0.143776
PSE	0.144313	0.243766	0.119608	0.114605	0.09037	0.253391	0.0896682		0.267289	0.186977		0.120781	0.129405	0.13403	0.291211	0.346998	0.405018	0.324568	0.487071	0.387037	0.0972217	0.196816					0.0848185	0.332166	0.251984
GRC	0.128495	0.277758	0.108587	0.104209	0.0876654	0.199628	0.0883798		0.232105	0.140244		0.0810987	0.0843477	0.120543	0.272842	0.306405	0.334128	0.289765	0.370805	0.316984	0.0871067	0.138105					0.0834448	0.237774	0.185097
ARG	0.133765	0.24587	0.0870162	0.109129	0.0762277	0.199976	0.0761297	0.146907	0.244588	0.142062	0.186002	0.0895243	0.0960514	0.112758	0.272258	0.316644	0.360317	0.29813	0.420236	0.345259	0.0803385	0.166072					0.0546786	0.24387	0.184266
IRQ	0.116964	0.225577	0.0950603	0.0954054	0.0684585	0.188346	0.0683425		0.213067	0.132057		0.0790831	0.083999	0.0990367	0.241248	0.277627	0.311939	0.261822	0.358549	0.298208	0.0711842	0.139105					0.0707647	0.226737	0.176477
MDG	0.102932	0.19904	0.0680796	0.0862594	0.0576552	0.146664	0.0586023		0.186176	0.0979473		0.0568249	0.0610525	0.0843295	0.210514	0.240112	0.267522	0.227508	0.30343	0.257476	0.0581683	0.116804					0.0464825	0.162361	0.127538
CMR	0.124345	0.243817	0.0762148	0.104405	0.0636444	0.170759	0.0641915		0.224527	0.113399		0.0659901	0.070906	0.0941593	0.254151	0.28899	0.320967	0.273948	0.362669	0.308863	0.0652917	0.139933					0.0494118	0.186526	0.145452
GAB	0.133586	0.260154	0.0913998	0.110606	0.0704749	0.195886	0.0704123		0.242224	0.134002		0.0797188	0.0851661	0.10369	0.273917	0.3133	0.350029	0.29621	0.39901	0.335716	0.0735051	0.154819					0.0624917	0.225331	0.17462
SDN	0.133844	0.21673	0.0938331	0.108872	0.0806394	0.218329	0.0813677		0.24717	0.156493		0.100936	0.10956	0.122573	0.26532	0.316669	0.370976	0.296967	0.446738	0.357097	0.085381	0.181891					0.0609032	0.274115	0.208544
EGY	0.115105	0.220982	0.073823	0.0931448	0.0696565	0.167807	0.0693757		0.210178	0.121106		0.0766469	0.0815628	0.100249	0.237991	0.274753	0.309647	0.258759	0.357481	0.295511	0.0726507	0.138884	0.180694	0.227834	0.335299	0.471359	0.0454066	0.207616	0.155066
AGO	0.120854	0.239709	0.0740017	0.101662	0.0617523	0.164351	0.0623161		0.217907	0.108526		0.0624908	0.0670601	0.0909246	0.24762	0.28065	0.310516	0.266237	0.349158	0.298779	0.0630551	0.133993					0.0482863	0.177589	0.138922
CUB	0.140732	0.263649	0.108628	0.114239	0.0796564	0.225831	0.0790428		0.257266	0.160362		0.098765	0.105292	0.117002	0.288092	0.334212	0.379065	0.314585	0.440731	0.362455	0.0845016	0.173474					0.0773264	0.277193	0.212951

## Sheet: LCOX_15deg30
	PEM	DAC	AD	AE	ATR_CCS	B_PYR_kerosene	CLR	CuCl	HB	HTL	HTSE	HVO_diesel	HVO_kerosene	M_PYR	PTM	RWGS_FT_diesel	RWGS_FT_kerosene	RWGS_MeOH_methanol	RWGS_MeOH_DME	RWGS_MeOH_kerosene	SMR_CCS	SOEC	SR_FT_diesel	SR_FT_kerosene	ST_FT_diesel	ST_FT_kerosene	TG_CCS	TG_FT_diesel	TG_FT_kerosene
ECU	0.125196	0.229505	0.080082	0.103989	0.0701248	0.166941	0.065024		0.230315	0.110391		0.0775428	0.0832969	0.0858049	0.25433	0.282116	0.314785	0.269496	0.359293	0.307603	0.0740487	0.126008					0.0476149	0.187601	0.14649
DEU	0.0962177	0.189933	0.111123	0.0744126	0.086607	0.178236	0.0843511		0.178503	0.123154		0.0838573	0.0863456	0.104194	0.205126	0.225229	0.246841	0.214095	0.279186	0.235474	0.0868956	0.0982891	0.227859	0.258462	0.305085	0.393838	0.0893927	0.220507	0.173432
EST	0.091014	0.184675	0.0924791	0.075373	0.0723546	0.150448	0.0727558		0.165667	0.0958321		0.0574375	0.0601263	0.0900658	0.190218	0.207744	0.225173	0.198795	0.248147	0.218031	0.0691958	0.0864129					0.0764478	0.162817	0.135572
MMR	0.113458	0.204658	0.0878646	0.0961727	0.0621938	0.164785	0.0585747		0.20806	0.105602		0.0680928	0.0738468	0.0772929	0.228084	0.253579	0.283815	0.242669	0.323834	0.279191	0.0642562	0.11313					0.0634398	0.17836	0.146986
MWI	0.0989801	0.173213	0.0685674	0.0837182	0.0587434	0.137304	0.0557891		0.182191	0.0890753		0.0600724	0.0654727	0.0728381	0.198446	0.221652	0.24987	0.211993	0.287576	0.246167	0.0600823	0.100342					0.0450904	0.150839	0.122089
HRV	0.103374	0.212265	0.0981674	0.0853334	0.0766533	0.164045	0.0762437		0.188027	0.104811		0.0639622	0.0667953	0.0951433	0.216387	0.235849	0.254913	0.225643	0.280159	0.246365	0.0744563	0.0978035					0.0785546	0.177482	0.145904
GIN	0.118112	0.222107	0.0720564	0.100953	0.0603177	0.150094	0.0570798		0.215173	0.0937666		0.0604078	0.0658082	0.0756923	0.238478	0.263421	0.291557	0.252464	0.327757	0.286584	0.0619445	0.114321					0.0449339	0.153075	0.124652
SOM	0.0983594	0.162404	0.0759958	0.0806077	0.0659094	0.14867	0.0615832		0.183468	0.102026		0.0739576	0.0797116	0.079853	0.19769	0.222686	0.254754	0.21215	0.299815	0.249866	0.0689439	0.10516					0.0499396	0.179892	0.141186
NZL	0.091345	0.178895	0.0920215	0.0707802	0.0670316	0.156428	0.062741		0.169549	0.108841		0.0766324	0.0791207	0.0794233	0.194468	0.213792	0.234743	0.20324	0.265985	0.224187	0.0707678	0.0935478					0.0689792	0.194248	0.14982
LTU	0.0927345	0.18506	0.0869465	0.0750494	0.0773175	0.148705	0.0767846		0.170059	0.0982399		0.0641397	0.0668696	0.095016	0.194846	0.213443	0.232731	0.203748	0.259514	0.224315	0.0753458	0.0907421					0.0667627	0.169728	0.135672
ZAF	0.0857178	0.164736	0.0619838	0.071832	0.0530774	0.118757	0.0513328	0.146353	0.156568	0.0758048	0.114416	0.0490854	0.0524698	0.0657873	0.17641	0.194315	0.213704	0.18599	0.239212	0.208531	0.0533535	0.0831746	0.132481	0.155888	0.213483	0.277291	0.0425714	0.126629	0.102214
DNK	0.0882606	0.173622	0.120999	0.0693986	0.0805116	0.180797	0.0793952		0.163209	0.121861		0.0772828	0.079771	0.097726	0.18716	0.205584	0.225291	0.195704	0.254033	0.215841	0.0793644	0.0891153	0.234599	0.261661	0.276532	0.35425	0.105975	0.217448	0.178001
CHN	0.0739625	0.144987	0.0497249	0.0620942	0.0656926	0.0980657	0.067334	0.122842	0.134747	0.0618562	0.0947705	0.0397998	0.0424886	0.0824174	0.153267	0.168319	0.183947	0.161218	0.204176	0.179279	0.0610052	0.0707064	0.109513	0.128304	0.188577	0.239962	0.0326924	0.101912	0.0818795
HUN	0.0958922	0.190878	0.0851695	0.0787927	0.0759979	0.148176	0.0756901	0.095247	0.175266	0.0961827	0.0898194	0.0614584	0.0645025	0.0940592	0.200013	0.219133	0.238973	0.209457	0.265791	0.231299	0.0736524	0.0927997					0.0649089	0.164011	0.132564
BGR	0.102089	0.209276	0.0956396	0.0851187	0.0744254	0.159996	0.0744241	0.0956709	0.18528	0.100854	0.0874067	0.0600931	0.0630435	0.0929311	0.212792	0.231955	0.25069	0.222124	0.274951	0.242973	0.0716811	0.0958254					0.0770859	0.169285	0.140825
SRB	0.12084	0.250698	0.0882186	0.101439	0.0611014	0.164116	0.0578723		0.218604	0.102152		0.0624804	0.0658649	0.0760104	0.251142	0.27314	0.294208	0.261758	0.320942	0.285393	0.0631479	0.112008					0.0628062	0.167038	0.135897
ARE	0.0791618	0.154409	0.0780192	0.064302	0.0549783	0.131091	0.0529323	0.109682	0.145441	0.086431	0.093533	0.0558677	0.0584958	0.0669256	0.165831	0.182333	0.199901	0.17407	0.224185	0.193219	0.0558406	0.0781444	0.156136	0.178742	0.209167	0.27261	0.0614908	0.149794	0.12106
KEN	0.0967995	0.17384	0.0963153	0.0815321	0.0579728	0.161733	0.055201		0.177884	0.104199		0.0646497	0.0695244	0.0717823	0.195524	0.217571	0.243694	0.208094	0.278588	0.239369	0.0591976	0.0971715					0.0786666	0.179188	0.150724
ETH	0.111241	0.199093	0.0786354	0.091843	0.0671294	0.157093	0.0626082		0.205467	0.105138		0.0741093	0.0795096	0.0818279	0.225887	0.251504	0.282298	0.240044	0.324773	0.275897	0.0704373	0.113856					0.0500327	0.181219	0.142152
TUN	0.0951767	0.161343	0.0709601	0.0791408	0.0613375	0.13933	0.0578937		0.176477	0.0932876		0.0654524	0.0708528	0.0750924	0.191191	0.214563	0.243833	0.20478	0.284098	0.23964	0.0633224	0.0993579					0.0471087	0.161802	0.128839
PER	0.103331	0.216257	0.0598497	0.088276	0.0521181	0.123389	0.0505989		0.18593	0.0736721		0.043756	0.0467064	0.0659322	0.214146	0.232516	0.249412	0.223277	0.269574	0.242927	0.0521308	0.0935542					0.0374098	0.114899	0.0938053
ITA	0.102145	0.206305	0.0862042	0.084726	0.0759501	0.152084	0.0756481		0.185946	0.0971213		0.0607275	0.0638606	0.094476	0.212661	0.232395	0.252328	0.222376	0.278645	0.244539	0.0735515	0.0972271	0.177552	0.20283	0.263284	0.333629	0.0650693	0.163335	0.132882
GRL	0.156989	0.354026	0.0896015	0.135462	0.0589555	0.179426	0.0562039		0.278978	0.101316		0.0527942	0.0555213	0.0762137	0.32776	0.351065	0.367792	0.337848	0.384539	0.356737	0.0603895	0.133741					0.0591708	0.149602	0.125755
SVK	0.0998723	0.204755	0.0954641	0.0829493	0.0744203	0.158648	0.0744278	0.205156	0.181427	0.10051	0.146739	0.0602569	0.06309	0.0927332	0.208591	0.227392	0.245778	0.217679	0.269788	0.237959	0.0717002	0.0940442					0.0772538	0.169442	0.140579
KHM	0.0923657	0.17443	0.0750995	0.0793439	0.051555	0.134761	0.0500373		0.168001	0.0832012		0.0493715	0.0535654	0.0650338	0.187087	0.206555	0.228089	0.198118	0.255358	0.224416	0.0513306	0.0886233					0.0579163	0.137358	0.116791
BRA	0.0960407	0.193622	0.0593578	0.0814157	0.052863	0.120494	0.0511776	0.127056	0.173945	0.0742351	0.101956	0.0463445	0.0495712	0.0662423	0.198284	0.216681	0.23508	0.207783	0.258191	0.229218	0.0530568	0.0896958					0.0377358	0.119427	0.0965545
JOR	0.083684	0.155734	0.0784885	0.069206	0.0553217	0.135229	0.0531398		0.153891	0.0884026		0.0569325	0.0605025	0.0678861	0.172112	0.190559	0.211483	0.182072	0.239918	0.206153	0.0561275	0.0836061					0.0612039	0.152454	0.124741
KGZ	0.106746	0.205771	0.0800704	0.0916724	0.0550596	0.148439	0.052867		0.193704	0.0911582		0.0543392	0.0588711	0.0695386	0.216595	0.238328	0.261844	0.228638	0.291409	0.257214	0.0555722	0.101343					0.0593018	0.148938	0.125633
UZB	0.0969267	0.192718	0.0763962	0.0828171	0.0521659	0.13741	0.0505849		0.175491	0.0841361		0.0492102	0.0527801	0.0657408	0.198795	0.217698	0.237053	0.208869	0.261145	0.231928	0.052144	0.0906604					0.0581935	0.137342	0.115914
RUS	0.100292	0.202661	0.0789215	0.0853247	0.0344588	0.141711	0.0299706	0.0944871	0.181427	0.0869294	0.0850317	0.0509737	0.0543582	0.0427778	0.206683	0.22575	0.24475	0.216557	0.268398	0.238844	0.0390938	0.0932566					0.059873	0.141873	0.119016
JAM	0.0974333	0.187571	0.0810396	0.0817936	0.0565895	0.144997	0.0541553		0.177841	0.092299		0.0577514	0.0616151	0.0701658	0.199924	0.220124	0.242094	0.210709	0.270964	0.236329	0.0575989	0.0944148					0.0611126	0.155291	0.127902
POL	0.0948945	0.188433	0.0911567	0.0758459	0.0803982	0.155416	0.0792883		0.174624	0.104349		0.0697781	0.0725079	0.0981561	0.200068	0.219372	0.239685	0.209149	0.268554	0.230384	0.0791612	0.0941131					0.0695981	0.182197	0.144036
NOR	0.12853	0.268572	0.102195	0.101412	0.0773306	0.188537	0.0711296		0.235751	0.128189		0.0899044	0.0923926	0.0919976	0.274026	0.298	0.321372	0.283974	0.355313	0.3065	0.0833774	0.125188					0.0685434	0.222175	0.168052
PRK	0.107636	0.175973	0.0950859	0.0883669	0.0697453	0.174403	0.0646532		0.200871	0.119048		0.0837852	0.0902541	0.0844189	0.21541	0.242953	0.278654	0.231443	0.328803	0.273612	0.0735821	0.115481					0.0687953	0.210803	0.168589
ARM	0.103791	0.209125	0.0792803	0.0883926	0.0542681	0.144415	0.0522968	0.0960565	0.187771	0.0885403	0.087334	0.052211	0.0557809	0.0682572	0.213531	0.233328	0.253201	0.223831	0.277948	0.247228	0.0547214	0.0966257					0.0591882	0.144177	0.120672
BLR	0.140616	0.231078	0.10936	0.116527	0.0808991	0.212309	0.0735898		0.261702	0.143953		0.102304	0.110849	0.0980685	0.279359	0.314759	0.360823	0.300071	0.424879	0.355053	0.0870505	0.149561					0.0737601	0.252357	0.200783
BRN	0.0952595	0.197784	0.0772792	0.0801966	0.0528503	0.136463	0.0512116		0.172213	0.0842961		0.0497131	0.0523705	0.0659855	0.19858	0.215985	0.232359	0.207086	0.252833	0.225542	0.0531159	0.087842					0.0589918	0.138197	0.114693
FIN	0.155028	0.344592	0.107057	0.130487	0.0838823	0.199347	0.0821662	0.114014	0.277777	0.120255	0.100378	0.069364	0.0719656	0.105663	0.325972	0.35027	0.369343	0.336148	0.391724	0.356202	0.083212	0.136851					0.0757613	0.190416	0.155248
BGD	0.0965894	0.18271	0.0794784	0.0818029	0.0553015	0.142926	0.0530831		0.176267	0.0902526		0.0558141	0.060008	0.0689632	0.196747	0.217196	0.239924	0.208026	0.269501	0.235103	0.055963	0.0938084					0.0602052	0.151189	0.125844
PRT	0.0955036	0.191126	0.0982043	0.0776945	0.0773923	0.160963	0.076839		0.174861	0.105335		0.0664223	0.0692554	0.0953152	0.200255	0.219246	0.238838	0.209392	0.265781	0.230458	0.0754123	0.0929094					0.0795668	0.182003	0.148312
GHA	0.120842	0.22941	0.0779931	0.103587	0.0601013	0.1569	0.0569058		0.219752	0.0972085		0.0609274	0.0663278	0.0756714	0.244084	0.269197	0.297165	0.258112	0.332807	0.292123	0.0616624	0.116043					0.0515992	0.158302	0.130554
UGA	0.11234	0.219937	0.0551937	0.0966422	0.0556965	0.127399	0.0533879		0.203399	0.0771533		0.0490358	0.0535677	0.0705446	0.228343	0.250616	0.274171	0.240523	0.303432	0.269125	0.0563361	0.10554					0.0285147	0.120972	0.0975108
ALB	0.120022	0.2485	0.0852596	0.101888	0.0584477	0.159734	0.0557018		0.216575	0.0975538		0.0578243	0.0613943	0.0734392	0.24818	0.269951	0.290768	0.25898	0.316448	0.282992	0.0598332	0.110241					0.0609995	0.157234	0.129948
SWZ	0.0901909	0.168448	0.0609318	0.0771579	0.0519487	0.120394	0.0503558		0.164417	0.0750328		0.0472464	0.0514404	0.0652653	0.182675	0.202046	0.223794	0.193681	0.251678	0.220119	0.0518302	0.0873879					0.0413128	0.123193	0.101771
KAZ	0.0953636	0.196137	0.075366	0.0812279	0.0511341	0.134183	0.0497947		0.172098	0.0815536		0.0468071	0.0497574	0.0644249	0.197394	0.214983	0.231796	0.206328	0.25233	0.225923	0.0509476	0.0875296					0.0577405	0.132141	0.111379
SLV	0.115004	0.222394	0.0880106	0.0967122	0.0617995	0.163483	0.0583467		0.209697	0.103909		0.0658391	0.070371	0.0766532	0.235341	0.25889	0.284531	0.247844	0.318155	0.277805	0.0639025	0.11112					0.0633768	0.173683	0.141872
KOR	0.0939159	0.185633	0.0823369	0.0741229	0.0649573	0.147351	0.0610468	0.120606	0.173417	0.100943	0.108295	0.0708612	0.0734893	0.0776345	0.198823	0.218207	0.238835	0.207792	0.26877	0.228937	0.0681618	0.0943375					0.0582766	0.177283	0.136294
SUR	0.11582	0.222793	0.06776	0.0988507	0.0590748	0.14343	0.0561081		0.21054	0.0890769		0.0571856	0.0620603	0.0741704	0.235212	0.258904	0.284781	0.248197	0.317818	0.279312	0.0604737	0.110783					0.0408865	0.144159	0.116681
LAO	0.103534	0.179147	0.0862684	0.0871528	0.0615784	0.158467	0.0580687		0.19101	0.103525		0.0682959	0.0740499	0.0760078	0.207367	0.231996	0.262347	0.221734	0.303304	0.25833	0.0635402	0.106003					0.0636585	0.17799	0.146159
GTM	0.110309	0.227324	0.0837385	0.0927902	0.0577726	0.153013	0.0551743		0.199625	0.0950592		0.0575084	0.0607351	0.0719969	0.229043	0.249393	0.269062	0.239036	0.293953	0.261299	0.0590848	0.102428					0.0612479	0.15577	0.127811
COG	0.122386	0.230614	0.0763058	0.10351	0.0639378	0.158087	0.0600229		0.22349	0.100599		0.0666064	0.0720068	0.0795025	0.248213	0.27412	0.303403	0.262443	0.341806	0.297311	0.0664195	0.119462					0.047133	0.166399	0.133386
THA	0.0878565	0.17493	0.0542395	0.0733827	0.0532498	0.111693	0.0515084		0.159949	0.0709212		0.0468171	0.0497675	0.0659581	0.182347	0.199735	0.217554	0.19123	0.240804	0.211482	0.0536114	0.0837323	0.131645	0.153615	0.258985	0.319539	0.0328606	0.116525	0.0917356
NLD	0.0928063	0.182224	0.102032	0.0718796	0.084962	0.167068	0.0830128	0.152537	0.172227	0.11568	0.127973	0.0796984	0.0821867	0.102361	0.197658	0.217211	0.238352	0.206488	0.269905	0.227559	0.0848692	0.094954					0.080182	0.206865	0.16168
HTI	0.108034	0.181329	0.0889319	0.0910479	0.0639131	0.165453	0.0599163		0.199858	0.108765		0.0728035	0.0792723	0.0787854	0.214824	0.241372	0.274982	0.230605	0.32054	0.271411	0.0663372	0.11215					0.064783	0.187836	0.153997
URY	0.0780434	0.150215	0.0572694	0.0647371	0.0519505	0.109491	0.0504469		0.142889	0.0708574		0.0468976	0.0498479	0.0640168	0.161694	0.178105	0.19579	0.170331	0.219431	0.190495	0.0520456	0.0762585					0.0389246	0.119451	0.0951958
PHL	0.0861536	0.172026	0.0653357	0.0732511	0.0497735	0.119818	0.0486763		0.156112	0.0737009		0.0439323	0.0469763	0.0624971	0.177661	0.194461	0.211435	0.186518	0.232676	0.206491	0.0492908	0.0806442					0.048296	0.120294	0.100325
LKA	0.106947	0.178343	0.089029	0.089958	0.064102	0.165163	0.060069		0.198064	0.108991		0.0733058	0.0797747	0.0788933	0.212616	0.239114	0.272827	0.228384	0.318688	0.269257	0.066577	0.111528					0.0649822	0.188801	0.154547
CIV	0.103882	0.212958	0.0627104	0.0891599	0.0521364	0.127072	0.0505799		0.187176	0.0759482		0.0448403	0.0482248	0.066133	0.213828	0.232954	0.251397	0.223716	0.273583	0.245641	0.0520966	0.0949424					0.0407578	0.119194	0.0985649
KWT	0.0709911	0.138305	0.0687017	0.0599056	0.046953	0.11415	0.0464039		0.129267	0.0714727		0.0420145	0.0447033	0.0585895	0.146751	0.161317	0.176518	0.154579	0.196022	0.172362	0.0459061	0.0677737	0.14176	0.159757	0.210128	0.259041	0.0565166	0.120131	0.101808
AUT	0.0893668	0.184715	0.096905	0.0755797	0.0677581	0.151291	0.0690282		0.161473	0.0931218		0.051027	0.0536286	0.0854609	0.185986	0.202435	0.217968	0.194177	0.237185	0.211922	0.0635063	0.0822532					0.0845932	0.155512	0.13452
MYS	0.0991971	0.204032	0.053541	0.0828776	0.0557475	0.117295	0.0535535		0.17987	0.0736697		0.0488358	0.0516689	0.0691294	0.20685	0.225352	0.243258	0.215862	0.266267	0.235829	0.056673	0.0927139					0.0285793	0.118689	0.0917482
ZMB	0.104983	0.18855	0.0696674	0.0891238	0.0592424	0.141325	0.0561981		0.192541	0.0905561		0.060187	0.0655873	0.0737384	0.211008	0.23476	0.262954	0.224692	0.300191	0.25885	0.0606728	0.104731					0.0450447	0.15156	0.122906
LBR	0.119483	0.225367	0.0726585	0.102058	0.0607621	0.151532	0.0574416		0.217634	0.0946897		0.061053	0.0664533	0.0762187	0.241428	0.266554	0.294803	0.25546	0.331152	0.289654	0.0624897	0.115527					0.0451493	0.154536	0.125663
MEX	0.0891816	0.178691	0.0545217	0.0754046	0.0514731	0.111724	0.0500588	0.131773	0.161753	0.0692477	0.102923	0.0438667	0.0469108	0.0643568	0.184348	0.201678	0.219156	0.193339	0.241286	0.213641	0.0513869	0.0837525	0.127792	0.148808	0.244651	0.301969	0.0339927	0.111836	0.0898492
MLI	0.0914711	0.153902	0.0684733	0.0768892	0.0582882	0.1336	0.0554146		0.169293	0.088185		0.0604878	0.0658882	0.0718757	0.182773	0.205326	0.233634	0.196155	0.272058	0.230387	0.0595535	0.0949555					0.0465676	0.151839	0.122729
BOL	0.119178	0.213811	0.079435	0.0983997	0.0700539	0.163584	0.0649626		0.220063	0.109666		0.0782324	0.0839864	0.085319	0.24184	0.269154	0.302	0.256886	0.347312	0.295109	0.0739899	0.121873					0.0479542	0.188563	0.146743
SLE	0.118504	0.223319	0.0718272	0.101419	0.0600668	0.149911	0.0568763		0.215768	0.0933616		0.059884	0.0652844	0.0754759	0.239231	0.26416	0.292194	0.253213	0.328142	0.287267	0.0616309	0.114432					0.0447371	0.15201	0.123997
FJI	0.0931197	0.174248	0.0835528	0.0766768	0.0593427	0.146997	0.0563889		0.171306	0.0967422		0.0634994	0.067363	0.0725392	0.191649	0.212005	0.2351	0.202475	0.266726	0.228828	0.0610391	0.0931823					0.0632725	0.166984	0.135085
VNM	0.089756	0.174546	0.0701522	0.0751971	0.0540985	0.128976	0.0521647		0.163729	0.0820445		0.0519194	0.0553039	0.0670584	0.185026	0.203419	0.223036	0.19473	0.248762	0.217419	0.054602	0.0865505					0.0509371	0.137334	0.112005
NIC	0.0990384	0.18773	0.0587229	0.0833461	0.0571776	0.125119	0.0546084		0.180975	0.0799948		0.0539443	0.0581383	0.070954	0.202277	0.223242	0.246556	0.213686	0.277243	0.241145	0.0582809	0.0966319					0.0341408	0.132222	0.10453
CAN	0.0899855	0.176691	0.0994714	0.0702359	0.0652012	0.161966	0.0612534	0.147606	0.166707	0.111194	0.122995	0.0754813	0.0779696	0.0775524	0.191207	0.210105	0.23045	0.199871	0.260464	0.220423	0.0685012	0.0914931					0.079082	0.198046	0.156047
NGA	0.099073	0.180392	0.0670729	0.0839769	0.0571582	0.134211	0.0545408		0.181513	0.0857847		0.0565287	0.0614034	0.0711491	0.200039	0.222116	0.247872	0.212616	0.281809	0.243652	0.0581748	0.098214					0.0441325	0.143391	0.116396
BHS	0.0917813	0.170903	0.0832002	0.0755117	0.0591303	0.145942	0.0562155		0.168969	0.0962331		0.0632844	0.067148	0.0722403	0.188824	0.20904	0.232105	0.199614	0.263757	0.225948	0.0607818	0.0921413					0.0632136	0.166426	0.134651
TJK	0.105628	0.202673	0.0802151	0.090536	0.0552958	0.148208	0.0530582		0.191873	0.0914651		0.0549345	0.0594664	0.0696904	0.214337	0.236026	0.259664	0.226369	0.289571	0.255024	0.0558711	0.10073					0.0595352	0.150095	0.126303
BLZ	0.120528	0.230487	0.092165	0.100769	0.0653289	0.172432	0.0611908		0.220357	0.111031		0.0720661	0.0769408	0.0805673	0.246483	0.271635	0.299582	0.259838	0.336808	0.292303	0.0682178	0.117846					0.0653481	0.18719	0.151422
PNG	0.101454	0.195824	0.0793866	0.0865502	0.0547797	0.144728	0.0526623		0.184386	0.0898136		0.0541717	0.0583657	0.0687939	0.206703	0.227431	0.249809	0.218052	0.278287	0.244901	0.0552913	0.0967932					0.0595351	0.14814	0.124193
ESP	0.100835	0.200071	0.114482	0.0807772	0.0824323	0.18195	0.0809269	0.129592	0.185468	0.121192	0.114226	0.0775656	0.0805159	0.100616	0.212128	0.232605	0.254235	0.221794	0.284898	0.244531	0.081631	0.0999172	0.21305	0.242109	0.231575	0.314211	0.0950164	0.212717	0.172663
JPN	0.161083	0.358798	0.14544	0.135847	0.0848117	0.239579	0.082918	0.179717	0.288402	0.144753	0.136952	0.0784727	0.0811615	0.107014	0.338453	0.363519	0.383033	0.348937	0.405691	0.369532	0.084326	0.141743					0.119585	0.234434	0.198838
DOM	0.0966441	0.188631	0.0811746	0.0807611	0.056692	0.14437	0.054261		0.176322	0.0921184		0.0577291	0.061299	0.0701146	0.199304	0.218982	0.239958	0.209574	0.267609	0.233691	0.0577663	0.0932633					0.0613056	0.155161	0.127236
DZA	0.0832545	0.159423	0.0601237	0.0701391	0.0515457	0.115022	0.0500872		0.151936	0.0728488		0.0465522	0.0499367	0.0641299	0.170934	0.188381	0.207307	0.180398	0.231977	0.202637	0.0514633	0.080554	0.133977	0.156522	0.23141	0.292536	0.0416831	0.121127	0.0985654
TUR	0.132939	0.270662	0.0984934	0.109685	0.0698521	0.184981	0.06495		0.242048	0.119307		0.0777493	0.0816129	0.0855004	0.276718	0.301962	0.327465	0.28878	0.361578	0.316704	0.0738973	0.126744	0.209178	0.242311	0.330593	0.423358	0.0678908	0.200018	0.15848
IRN	0.0940222	0.170883	0.0811546	0.0789405	0.0572194	0.144973	0.0546133	0.155076	0.172699	0.0937137	0.127873	0.0601245	0.0646563	0.0707531	0.190747	0.21189	0.236603	0.202642	0.269661	0.231998	0.0583163	0.0940271					0.0615979	0.160034	0.131936
COL	0.0965451	0.19626	0.0609254	0.0813689	0.053769	0.12244	0.0519282		0.174937	0.0760092		0.0478802	0.0509242	0.0670957	0.200164	0.218461	0.236509	0.2094	0.259373	0.230074	0.0542024	0.0901764					0.0389527	0.122999	0.0987265
FLK	0.15276	0.331433	0.0921897	0.131027	0.0620476	0.18305	0.0586459		0.273281	0.107191		0.0601023	0.0636782	0.0792047	0.316882	0.341795	0.362817	0.328484	0.386652	0.352647	0.0641442	0.134735					0.0613495	0.164629	0.136615
SWE	0.0866745	0.178276	0.0806883	0.0726318	0.0686075	0.134798	0.0697252	0.06698	0.157062	0.0840811	0.0651666	0.049147	0.0516353	0.0860611	0.180994	0.197202	0.21272	0.188976	0.232437	0.206381	0.0645883	0.0806857					0.0653776	0.140136	0.117462
GMB	0.0876653	0.166633	0.0591002	0.0751493	0.0503425	0.116101	0.0490752		0.159424	0.0716214		0.0442215	0.0480851	0.063425	0.178168	0.196524	0.216596	0.188487	0.242004	0.212869	0.0498882	0.0839162					0.040459	0.116633	0.0968429
AUS	0.0907623	0.176685	0.0929489	0.0698697	0.0679573	0.157569	0.0634925		0.168826	0.110421		0.0784464	0.0809347	0.0802814	0.193484	0.212926	0.234227	0.202286	0.266272	0.223461	0.0719202	0.0937232	0.200231	0.230256	0.295634	0.382583	0.0696495	0.198	0.152173
HND	0.104726	0.204448	0.084897	0.0874209	0.0595702	0.153613	0.056581		0.191104	0.0983006		0.0623397	0.0662033	0.0735646	0.215759	0.237041	0.259828	0.226819	0.289974	0.252971	0.0612652	0.101214					0.0626802	0.165485	0.134823
QAT	0.0717384	0.14135	0.0681795	0.0607795	0.0463745	0.113569	0.0459392		0.130327	0.0704643		0.0407614	0.0433895	0.0580596	0.148364	0.162786	0.177538	0.156077	0.196194	0.17339	0.0451915	0.0677844					0.0560879	0.117563	0.100107
CRI	0.105371	0.209367	0.0850155	0.087784	0.0595288	0.153533	0.0565707		0.191981	0.0980083		0.0618519	0.0654218	0.0734731	0.218077	0.23892	0.260615	0.228643	0.289225	0.253227	0.061247	0.100948					0.0626825	0.164495	0.133695
BIH	0.137322	0.27877	0.0930309	0.116464	0.0645311	0.179809	0.0605794		0.248432	0.110966		0.0679073	0.0724392	0.0808516	0.282258	0.307991	0.333856	0.295313	0.366418	0.32542	0.0671864	0.12798					0.063806	0.179804	0.147097
MDA	0.109348	0.207526	0.0875739	0.0913956	0.0618943	0.160582	0.0584201		0.20011	0.103514		0.0667895	0.0713214	0.0763532	0.223642	0.246777	0.272641	0.236041	0.307146	0.266148	0.0640477	0.107334					0.063806	0.175221	0.142513
CHE	0.134309	0.280893	0.111059	0.105307	0.0811184	0.20173	0.0742098	0.0839458	0.246675	0.138051	0.100345	0.0971552	0.0996435	0.0960749	0.28692	0.312002	0.33653	0.297149	0.372591	0.320429	0.0880534	0.131457					0.0758402	0.240672	0.181922
RWA	0.109219	0.217305	0.0640742	0.0944216	0.0532059	0.132629	0.0513889		0.197131	0.0791526		0.0470018	0.0511958	0.0678045	0.222415	0.24346	0.265016	0.233844	0.291163	0.260157	0.0532991	0.1011					0.0409462	0.124206	0.103549
FRA	0.0956862	0.189305	0.122311	0.0754577	0.0830859	0.187068	0.0814775	0.0795766	0.176698	0.126076	0.0867891	0.0808233	0.0834807	0.100796	0.202603	0.222322	0.243305	0.211695	0.273802	0.233156	0.0825043	0.0961438	0.237381	0.266237	0.282411	0.365242	0.104768	0.224098	0.182139
PAK	0.103728	0.182747	0.0875432	0.0866037	0.0626482	0.159813	0.0589637	0.118127	0.191394	0.105108	0.116315	0.0698999	0.0753003	0.0769574	0.20923	0.233486	0.262936	0.223042	0.302999	0.25802	0.0649086	0.105981					0.0644665	0.181342	0.147659
IRL	0.0950616	0.188234	0.111116	0.0751761	0.0823246	0.175614	0.0808588		0.175416	0.118455		0.0772127	0.07987	0.100013	0.201124	0.220662	0.241395	0.21017	0.271389	0.231468	0.0815618	0.095249					0.0920687	0.209634	0.168677
LUX	0.100089	0.19988	0.108803	0.0779287	0.086853	0.177877	0.0845533		0.185156	0.122201		0.0831412	0.0856295	0.104701	0.213209	0.23365	0.25522	0.222263	0.287204	0.243614	0.0871822	0.101073					0.0858227	0.217361	0.170456
LVA	0.0933837	0.188131	0.0943399	0.0770818	0.0739421	0.154398	0.0740354		0.170257	0.0990178		0.0602476	0.0630807	0.0918193	0.195027	0.213249	0.231683	0.203969	0.256246	0.22428	0.0711379	0.0893376					0.077345	0.168902	0.139849
BWA	0.0802777	0.160298	0.0562109	0.0683059	0.0479474	0.107084	0.0472061		0.145445	0.0656488		0.0396081	0.0424412	0.0602468	0.165752	0.181438	0.1972	0.174052	0.216846	0.192621	0.047078	0.0750346					0.03955	0.106306	0.0879504
LBN	0.136946	0.22449	0.104682	0.114715	0.0768209	0.203921	0.070275		0.25428	0.13637		0.0951647	0.103709	0.0938555	0.270765	0.305167	0.349901	0.291224	0.411312	0.345339	0.0820035	0.144547					0.0712089	0.23711	0.190862
MNG	0.0880552	0.15961	0.0797743	0.0734239	0.0563439	0.139962	0.0539243		0.16206	0.0912476		0.0589333	0.0631272	0.0693835	0.179312	0.199293	0.222678	0.190473	0.254284	0.217978	0.057299	0.0886501					0.0614676	0.157038	0.129057
NAM	0.0907505	0.169495	0.0641418	0.0752397	0.0573873	0.126211	0.0547991		0.166711	0.0827541		0.0563992	0.0602628	0.0704769	0.186266	0.206097	0.228575	0.196959	0.259019	0.22291	0.0586221	0.0903641					0.0418448	0.140571	0.111145
IND	0.108166	0.227942	0.0620038	0.093496	0.0507327	0.127145	0.0494623	0.102377	0.193876	0.0738211	0.0847193	0.0414112	0.0445443	0.0649837	0.223214	0.242009	0.258905	0.232691	0.27818	0.252874	0.050364	0.0964074	0.130136	0.149767	0.226133	0.278885	0.0399268	0.112531	0.0942394
TZA	0.0975749	0.190818	0.0625454	0.0834657	0.0527008	0.125149	0.0509969		0.176955	0.0767819		0.047286	0.0511496	0.066401	0.199277	0.218804	0.239383	0.209892	0.265211	0.234605	0.0527688	0.0921096					0.0414325	0.123845	0.102023
MAR	0.0790547	0.148968	0.0614799	0.0654473	0.0531477	0.115081	0.0513981		0.14515	0.0751128		0.0499536	0.0531803	0.0653413	0.163149	0.1803	0.19937	0.172333	0.225126	0.194206	0.0534929	0.0783236	0.133136	0.156491	0.213835	0.277925	0.0430873	0.127902	0.102339
NER	0.0930656	0.153075	0.0690009	0.0780875	0.0597946	0.136207	0.0566132		0.172696	0.0906765		0.0632239	0.068978	0.0735506	0.18524	0.208756	0.238822	0.199325	0.279886	0.235735	0.0613757	0.0977847					0.0461008	0.156988	0.126295
PRY	0.0869488	0.168979	0.061709	0.0718449	0.0553948	0.11993	0.0532356		0.159156	0.0780174		0.052336	0.0554691	0.0680384	0.180369	0.198364	0.217634	0.189644	0.24356	0.211375	0.0562569	0.0848619					0.0406605	0.131568	0.10377
OMN	0.0865722	0.161674	0.0865693	0.0687363	0.0625631	0.147742	0.0590504		0.160659	0.101174		0.0697275	0.0729542	0.0750015	0.181007	0.200387	0.222561	0.190755	0.254561	0.214651	0.0651493	0.0892487					0.0660518	0.179457	0.141471
SVN	0.112391	0.231216	0.105688	0.0912652	0.0829305	0.178771	0.081348	0.107049	0.205177	0.116819	0.100795	0.0744914	0.0773245	0.101862	0.236595	0.257849	0.278848	0.246304	0.307685	0.268287	0.0822083	0.107811					0.0822645	0.200256	0.160934
VEN	0.155178	0.267736	0.0954961	0.129347	0.0828492	0.206588	0.0751828		0.287024	0.138438		0.100162	0.108707	0.100971	0.310011	0.346865	0.393134	0.33109	0.456629	0.386207	0.0894015	0.160666					0.053665	0.237547	0.18515
MKD	0.123485	0.256959	0.0864552	0.104798	0.0592639	0.162884	0.0563669		0.2227	0.0993431		0.0588802	0.0624501	0.0744715	0.255556	0.277735	0.298727	0.266459	0.324547	0.290585	0.06083	0.1131					0.0613343	0.159723	0.131738
AZE	0.107	0.219757	0.0818585	0.0902856	0.056298	0.148912	0.0539745		0.193573	0.0921199		0.0551975	0.0584242	0.0703362	0.221829	0.241667	0.260922	0.231692	0.285138	0.253686	0.0572695	0.0992679					0.060453	0.150665	0.124365
ZWE	0.102274	0.180715	0.0704823	0.0861954	0.0602523	0.141451	0.0570167		0.188228	0.0920737		0.0624494	0.0678497	0.074531	0.205638	0.229361	0.258006	0.219315	0.296414	0.253767	0.0619402	0.103513					0.0459096	0.156081	0.125621
ISR	0.0830034	0.158118	0.0823422	0.0666503	0.0588111	0.139582	0.0560224		0.15331	0.0939097		0.06288	0.0658303	0.0710199	0.173634	0.19163	0.211593	0.182672	0.239858	0.204321	0.0605416	0.0838672					0.0637845	0.164811	0.131433
CZE	0.0945777	0.194074	0.0747697	0.0785288	0.0727168	0.135183	0.0730547	0.109184	0.171808	0.0857042	0.0923948	0.0535413	0.0561987	0.0906539	0.197797	0.215608	0.232933	0.206406	0.255529	0.225482	0.0696323	0.0889869					0.054652	0.142703	0.115391
CYP	0.110874	0.230211	0.101288	0.0914363	0.0789218	0.171654	0.078091		0.201436	0.109573		0.0671878	0.0700209	0.0978652	0.232481	0.252914	0.272535	0.241982	0.298473	0.263067	0.0772372	0.104304					0.079622	0.184839	0.151032
SEN	0.0875282	0.164892	0.0477315	0.0742814	0.0522113	0.106149	0.050593		0.159733	0.0668916		0.0448101	0.0486737	0.0652295	0.178336	0.19701	0.217752	0.188735	0.244633	0.213555	0.0522097	0.0849771					0.0259622	0.109003	0.0865286
COD	0.113123	0.221279	0.0823699	0.0969942	0.0566547	0.154385	0.0541667		0.205009	0.0946165		0.0564565	0.0609884	0.071529	0.230199	0.2527	0.27657	0.242437	0.306464	0.271244	0.0575223	0.106665					0.0599812	0.153883	0.12916
GEO	0.0991709	0.202932	0.0733407	0.0859938	0.0490268	0.133459	0.0480513		0.178266	0.0786245		0.0428179	0.0462023	0.0627881	0.203312	0.221531	0.239025	0.212971	0.259466	0.234276	0.0482578	0.0898194					0.0559486	0.124122	0.107296
IDN	0.0937716	0.187813	0.0720102	0.0781426	0.0553786	0.132733	0.0532338		0.170688	0.0843796		0.0533933	0.0564374	0.0684658	0.194805	0.213173	0.231888	0.204059	0.256399	0.225168	0.0562148	0.0892847					0.0516366	0.140718	0.113776
ROU	0.109252	0.22118	0.103215	0.0893683	0.0809792	0.174381	0.0797374	0.102114	0.199485	0.113344	0.0977894	0.0715958	0.0747289	0.0998501	0.228606	0.249768	0.271254	0.238683	0.300466	0.261858	0.0797626	0.105164					0.0810596	0.193961	0.157289
GUY	0.106201	0.222927	0.0613261	0.0905057	0.0532519	0.126718	0.0515217		0.191137	0.0759646		0.0454884	0.0484387	0.0672318	0.220368	0.239157	0.25636	0.229605	0.276994	0.249455	0.053525	0.0962054					0.038	0.118757	0.0964313
MOZ	0.106206	0.190314	0.0674992	0.0894966	0.0611851	0.140862	0.0577769		0.195184	0.0915016		0.0627045	0.0681049	0.075709	0.214013	0.2382	0.267046	0.227808	0.305618	0.262391	0.0630796	0.106762					0.0411506	0.154047	0.122784
NPL	0.0982211	0.194776	0.0784267	0.0833139	0.0539626	0.140931	0.0520451		0.178212	0.0874448		0.0523996	0.0559696	0.0675745	0.201912	0.22123	0.241181	0.212091	0.266486	0.235539	0.054369	0.09265					0.0593383	0.144126	0.120307
PAN	0.0978504	0.197022	0.0807534	0.0817634	0.0560454	0.143466	0.053771		0.177878	0.090671		0.0558713	0.0590044	0.0694256	0.20312	0.222062	0.241198	0.212635	0.266074	0.234278	0.057012	0.0926753					0.0608928	0.151336	0.124076
ISL	0.171721	0.380916	0.108344	0.142716	0.0752789	0.212972	0.0694747		0.308727	0.131636		0.0813232	0.084012	0.0930666	0.362369	0.389607	0.411519	0.373403	0.438666	0.395561	0.0805948	0.153748					0.0693891	0.210528	0.165334
CHL	0.0777242	0.151271	0.0585129	0.0639749	0.0526388	0.110578	0.0510231		0.142391	0.0721105		0.0480897	0.0508196	0.064589	0.161942	0.17809	0.195238	0.170225	0.218398	0.189396	0.0529295	0.0759572	0.129928	0.151405	0.218522	0.278163	0.0400222	0.122217	0.0967249
SAU	0.0861612	0.166152	0.0876491	0.0675136	0.063432	0.148185	0.0598007		0.159811	0.102118		0.0707827	0.0734401	0.0756261	0.182283	0.200855	0.221305	0.191085	0.251302	0.212199	0.0663015	0.088191	0.181225	0.209091	0.250025	0.329772	0.0668113	0.181594	0.141767
YEM	0.118632	0.203978	0.0972309	0.0982206	0.0707817	0.18196	0.0655019		0.219866	0.121977		0.0842246	0.0906935	0.0861871	0.23845	0.267015	0.302716	0.254741	0.352101	0.296911	0.0748158	0.123597					0.0687953	0.212605	0.170391
BEL	0.0964776	0.189667	0.106855	0.0752815	0.0853963	0.173849	0.0833546	0.134602	0.178713	0.119427	0.119068	0.0810917	0.0837491	0.103093	0.204802	0.224988	0.246768	0.214012	0.278948	0.235993	0.0853697	0.0981085					0.0850182	0.212791	0.167642
USA	0.0822704	0.164274	0.0849367	0.0671939	0.0494042	0.138755	0.046668	0.0784054	0.150546	0.09024	0.0752555	0.0562707	0.058759	0.0600187	0.172676	0.189138	0.205998	0.180723	0.228948	0.199004	0.0514217	0.0797607	0.163635	0.185403	0.202254	0.263481	0.0692644	0.155438	0.12739
UKR	0.125341	0.221658	0.106364	0.104551	0.0706106	0.193645	0.0653672	0.100688	0.231222	0.127562	0.117708	0.0848944	0.0913633	0.086486	0.252313	0.28136	0.316775	0.268726	0.365069	0.310709	0.0745708	0.128052					0.0785134	0.220303	0.179235
SLB	0.10067	0.184609	0.081549	0.0854885	0.0571066	0.148805	0.0544999		0.184213	0.0945011		0.0593738	0.0642485	0.0712097	0.203337	0.225527	0.251211	0.215943	0.28488	0.246932	0.0581029	0.0992681					0.0610071	0.159017	0.132311
GBR	0.0951728	0.185866	0.119726	0.0738562	0.0686579	0.185918	0.064051	0.138632	0.176647	0.127706	0.121927	0.0849847	0.0876421	0.0813234	0.202224	0.222403	0.244413	0.211433	0.277186	0.233563	0.0727478	0.0975448					0.100178	0.229093	0.183021
SYR	0.108145	0.153262	0.0960203	0.0900417	0.0712397	0.179622	0.0657236		0.203699	0.123624		0.0886429	0.0971872	0.0864417	0.209726	0.240947	0.28466	0.22938	0.345842	0.282829	0.0752122	0.121521					0.0692495	0.221143	0.178985
MNE	0.12768	0.26124	0.0917677	0.107098	0.0639877	0.172931	0.0601835		0.231408	0.108405		0.0674801	0.0713437	0.0794435	0.264401	0.288211	0.311801	0.2761	0.342106	0.302776	0.0666398	0.119547					0.0642209	0.17809	0.144212
BEN	0.0967209	0.188428	0.0626866	0.0825856	0.0529102	0.125018	0.0511664		0.175564	0.0770675		0.047795	0.0516586	0.066545	0.197557	0.217056	0.237739	0.208165	0.263851	0.232945	0.053033	0.0916584					0.0416307	0.124842	0.102607
LBY	0.0743579	0.142289	0.0573934	0.0622161	0.0496291	0.106679	0.048559		0.13595	0.0681494		0.0436974	0.0466478	0.061508	0.153495	0.169216	0.186197	0.161956	0.208559	0.181662	0.0491805	0.0723193					0.0410523	0.114404	0.092965
BFA	0.0973881	0.176226	0.066564	0.0825343	0.0568296	0.132787	0.0542728		0.178553	0.0850353		0.0561433	0.061018	0.0707134	0.196468	0.218358	0.244054	0.208998	0.277976	0.239994	0.0577749	0.0968656					0.0440164	0.142448	0.115696
PSE	0.11669	0.169715	0.105306	0.0948569	0.0792214	0.196772	0.072212		0.220539	0.138601		0.10243	0.110975	0.0947815	0.229365	0.262643	0.308912	0.24954	0.375079	0.304657	0.0850831	0.132259					0.0741549	0.250703	0.198305
GRC	0.106667	0.213944	0.0986193	0.0873289	0.0802409	0.168548	0.0791288		0.194942	0.109745		0.0698924	0.0731191	0.0989856	0.222754	0.243742	0.265388	0.232909	0.294845	0.256462	0.0788466	0.103167					0.0765173	0.187849	0.151971
ARG	0.113256	0.192006	0.0764221	0.0943241	0.0679487	0.158	0.0631974	0.131874	0.209905	0.106028	0.133141	0.0758514	0.0823202	0.0830645	0.226623	0.254279	0.289151	0.242684	0.337101	0.284313	0.0713236	0.118193					0.046748	0.183166	0.144271
IRQ	0.0945304	0.16563	0.0851495	0.0781967	0.0610474	0.151687	0.0576969		0.174917	0.100864		0.0675965	0.0724712	0.0746094	0.191565	0.213979	0.241274	0.204228	0.278882	0.236267	0.0630269	0.0975275					0.0640965	0.175746	0.142591
MDG	0.0897942	0.166872	0.0616665	0.0764995	0.0526763	0.121323	0.0509465		0.163954	0.0762809		0.0486637	0.0528577	0.065944	0.182029	0.201497	0.223518	0.19306	0.252025	0.219675	0.0527357	0.0875674					0.0418356	0.126129	0.103616
CMR	0.11543	0.222265	0.0699543	0.0987502	0.0584085	0.144996	0.0555667		0.209683	0.0896264		0.0566364	0.0615111	0.0734966	0.234242	0.257787	0.28344	0.24719	0.316014	0.278159	0.0596482	0.110107					0.0439333	0.144927	0.118348
GAB	0.122891	0.231822	0.0837364	0.103921	0.0640903	0.165535	0.0601471		0.224392	0.105263		0.0684101	0.0738105	0.0796855	0.249296	0.275268	0.304588	0.263542	0.343038	0.298435	0.0666065	0.1199					0.055748	0.175008	0.141845
SDN	0.107061	0.150612	0.0812665	0.0891304	0.0709839	0.164823	0.0655151		0.201781	0.114414		0.0851518	0.093696	0.0861182	0.207416	0.23851	0.282167	0.227038	0.343305	0.280451	0.0748997	0.120625					0.0521317	0.204204	0.162266
EGY	0.0924132	0.159388	0.0636093	0.0758445	0.0619965	0.13057	0.0584665		0.171593	0.0888921		0.0647531	0.0696278	0.0753839	0.187407	0.209826	0.23753	0.200071	0.276178	0.232377	0.0642159	0.0966742	0.149475	0.183211	0.265709	0.357521	0.0384419	0.154794	0.12
AGO	0.108344	0.20893	0.0673103	0.0926169	0.0564416	0.137659	0.0539906		0.196821	0.0851145		0.0535503	0.0580821	0.0709908	0.220241	0.24234	0.266295	0.232377	0.296705	0.261239	0.0572808	0.103283					0.0431307	0.137873	0.112811
CUB	0.119895	0.207194	0.0974772	0.0993523	0.0709008	0.182828	0.0655994		0.222047	0.122313		0.0842751	0.090744	0.0863902	0.241096	0.269779	0.30548	0.257417	0.354777	0.299586	0.0749575	0.124529					0.0687953	0.212812	0.170597

## Sheet: LCOX_Base50
	PEM	DAC	AD	AE	ATR_CCS	B_PYR_kerosene	CLR	CuCl	HB	HTL	HTSE	HVO_diesel	HVO_kerosene	M_PYR	PTM	RWGS_FT_diesel	RWGS_FT_kerosene	RWGS_MeOH_methanol	RWGS_MeOH_DME	RWGS_MeOH_kerosene	SMR_CCS	SOEC	SR_FT_diesel	SR_FT_kerosene	ST_FT_diesel	ST_FT_kerosene	TG_CCS	TG_FT_diesel	TG_FT_kerosene
ECU	0.128799	0.220251	0.0930438	0.117585	0.0843553	0.179746	0.0781274		0.237429	0.15736		0.0980183	0.103817	0.10635	0.261642	0.318906	0.36456	0.28648	0.411418	0.330904	0.0940177	0.176593					0.0623442	0.287199	0.210076
DEU	0.0984962	0.197752	0.124082	0.0838537	0.101421	0.18667	0.0973854		0.183118	0.166926		0.103942	0.106442	0.127245	0.215737	0.260655	0.293174	0.232235	0.326581	0.25895	0.108245	0.138395	0.252775	0.295377	0.290902	0.401208	0.10563	0.319993	0.236875
EST	0.100244	0.190294	0.102716	0.0922169	0.0829749	0.15908	0.0817443		0.182383	0.124252		0.0703277	0.0730304	0.108622	0.208258	0.244297	0.269319	0.22152	0.291296	0.244464	0.0846188	0.123061					0.0860776	0.226041	0.176353
MMR	0.123383	0.204524	0.0999088	0.115373	0.0745369	0.177646	0.0698277		0.226083	0.144491		0.0850715	0.09087	0.0958777	0.245807	0.297646	0.339148	0.268839	0.380546	0.310832	0.0814928	0.163314					0.0749098	0.260284	0.199703
MWI	0.102836	0.164244	0.0783873	0.0955345	0.0695175	0.146735	0.0656554		0.189552	0.124199		0.0755153	0.0809567	0.0889594	0.204734	0.251666	0.290343	0.226451	0.330389	0.265705	0.0752392	0.141936					0.0556279	0.225498	0.169822
HRV	0.118068	0.228092	0.110782	0.108682	0.0891234	0.177567	0.0868783		0.214335	0.138842		0.0788562	0.0817047	0.116447	0.245525	0.28624	0.3138	0.25983	0.337199	0.284702	0.0923682	0.142538					0.0896558	0.250429	0.193197
GIN	0.10992	0.179038	0.0796149	0.102726	0.0699662	0.151156	0.0660014		0.201793	0.125388		0.0752435	0.0806849	0.090033	0.218684	0.266253	0.304791	0.240247	0.343742	0.27942	0.0757823	0.147501					0.055362	0.225133	0.170011
SOM	0.0974428	0.153058	0.0868793	0.0870206	0.0787146	0.157479	0.0734968		0.182478	0.145459		0.0933263	0.0991248	0.0978758	0.197899	0.250438	0.295066	0.222674	0.344344	0.266497	0.0869433	0.14848					0.0638637	0.274127	0.201091
NZL	0.0956239	0.190524	0.104756	0.0818519	0.0809889	0.167303	0.0752821		0.177601	0.151749		0.0957785	0.0982786	0.0998241	0.208643	0.251929	0.283319	0.224668	0.31542	0.250723	0.0905648	0.133629					0.0843308	0.288979	0.210356
LTU	0.100313	0.192965	0.098287	0.0900636	0.0894801	0.159099	0.0872623		0.183893	0.133057		0.0796195	0.0823637	0.115257	0.211777	0.25134	0.279463	0.226474	0.305989	0.251358	0.0929232	0.129504					0.078678	0.24591	0.1846
ZAF	0.085538	0.149787	0.0695321	0.0787593	0.0617201	0.123471	0.0590337	0.114128	0.156874	0.102165	0.11479	0.0610737	0.0644794	0.0793845	0.175056	0.210559	0.237705	0.190061	0.264217	0.216381	0.0657831	0.112277	0.146101	0.176242	0.197639	0.274779	0.0513559	0.185292	0.139531
DNK	0.0886994	0.173718	0.131791	0.0765665	0.0931354	0.184235	0.0904072		0.164581	0.157282		0.0943573	0.0968574	0.117952	0.192263	0.232306	0.261571	0.207417	0.2914	0.232229	0.097698	0.1234	0.254699	0.291939	0.259717	0.355959	0.119659	0.301979	0.231817
CHN	0.08637	0.157846	0.0587699	0.0807166	0.0746464	0.110718	0.0747492	0.0956571	0.156847	0.0867109	0.095118	0.0500399	0.0527426	0.0989306	0.176872	0.207782	0.229728	0.188923	0.248899	0.210066	0.0740343	0.105067	0.124079	0.148446	0.17946	0.241831	0.0399082	0.1518	0.114363
HUN	0.104971	0.197914	0.0963905	0.0957238	0.087784	0.159138	0.0858163	0.0768159	0.191739	0.129694	0.0948591	0.0762485	0.0793102	0.113958	0.218617	0.258554	0.287069	0.233701	0.313386	0.259778	0.0906657	0.13278					0.0759971	0.236519	0.179243
BGR	0.116825	0.222702	0.107595	0.108518	0.086136	0.172815	0.0843566	0.0767001	0.211655	0.132326	0.0916326	0.073883	0.0768501	0.113304	0.241023	0.280481	0.307273	0.255098	0.329616	0.279879	0.0885296	0.139356					0.0871605	0.236654	0.184571
SRB	0.127117	0.240449	0.0993508	0.118125	0.0725543	0.173385	0.0680187		0.230443	0.135392		0.0773164	0.0807221	0.0940392	0.261411	0.304928	0.334942	0.277181	0.360475	0.305179	0.0794511	0.15275					0.0738417	0.239681	0.182494
ARE	0.0880365	0.165927	0.0882214	0.0794922	0.0654118	0.14125	0.0621163	0.0869108	0.16142	0.116771	0.0967968	0.0692679	0.0719093	0.0833064	0.184909	0.220089	0.245455	0.198431	0.269512	0.22139	0.0706587	0.113964	0.174865	0.205115	0.202649	0.280482	0.0716101	0.215611	0.16347
KEN	0.102499	0.169661	0.106373	0.0950596	0.0687242	0.169081	0.0649603		0.188445	0.136849		0.0796341	0.0845448	0.0880936	0.205754	0.250588	0.286612	0.225827	0.323134	0.261915	0.0743373	0.138414					0.089028	0.251771	0.197247
ETH	0.11935	0.203632	0.0918027	0.108654	0.0810738	0.172023	0.0753747		0.220293	0.150635		0.0936944	0.0991358	0.102168	0.242989	0.296883	0.339961	0.266482	0.384438	0.308311	0.0899375	0.164919					0.0640231	0.276396	0.203195
TUN	0.106533	0.173903	0.0832038	0.0978454	0.0739103	0.154971	0.0693625		0.196813	0.134183		0.0828172	0.0882586	0.0937558	0.214284	0.263715	0.304189	0.236764	0.346427	0.27707	0.0808374	0.148801					0.0590562	0.245784	0.182951
PER	0.09613	0.1758	0.0655309	0.0902465	0.0593168	0.12256	0.0569236		0.174239	0.0945391		0.0538331	0.0568001	0.0778261	0.195962	0.229445	0.253096	0.208882	0.273392	0.231826	0.0627629	0.115581					0.045019	0.164522	0.124951
ITA	0.113758	0.214951	0.0979149	0.104879	0.0878609	0.164512	0.0858429		0.206883	0.130555		0.0753081	0.0784598	0.114808	0.235306	0.276065	0.304582	0.250355	0.329742	0.276706	0.0907065	0.139654	0.197059	0.230471	0.248358	0.334214	0.0758377	0.234656	0.178957
GRL	0.156748	0.307504	0.0985382	0.149857	0.0682232	0.182074	0.0641704		0.2799	0.125038		0.0640286	0.0667701	0.0921573	0.318988	0.359859	0.383615	0.330991	0.396603	0.353312	0.073935	0.166952					0.0676689	0.20488	0.160915
SVK	0.113289	0.216812	0.107157	0.104795	0.0860355	0.170614	0.084283	0.157939	0.205491	0.131769	0.144323	0.0740543	0.0769028	0.112885	0.234593	0.273426	0.299829	0.248436	0.322116	0.27263	0.0884423	0.136131					0.0874462	0.236962	0.184343
KHM	0.103623	0.176627	0.0845528	0.0984771	0.0607336	0.145167	0.0581472		0.18823	0.10983		0.0609897	0.065213	0.08001	0.206286	0.244865	0.274251	0.222765	0.301274	0.252879	0.0642666	0.128348					0.0655327	0.193316	0.153065
BRA	0.0925496	0.165762	0.0660794	0.0862068	0.0608667	0.122836	0.0582685	0.0995056	0.168611	0.0982384	0.10304	0.0574786	0.0607249	0.0791138	0.188783	0.223743	0.249475	0.202925	0.273119	0.227934	0.0646975	0.11579					0.0459808	0.174035	0.131094
JOR	0.0931805	0.165164	0.0887985	0.085401	0.0658328	0.145959	0.0624929		0.170967	0.119782		0.0707274	0.0743204	0.0842525	0.191348	0.230016	0.259457	0.207451	0.288281	0.235683	0.0709654	0.122629					0.0711194	0.219683	0.168085
KGZ	0.114573	0.196917	0.0897011	0.108678	0.0648101	0.157311	0.0615665		0.208092	0.119963		0.0671467	0.0717113	0.0851369	0.228347	0.270743	0.302919	0.246235	0.332468	0.279019	0.0693565	0.141796					0.0678849	0.210767	0.165439
UZB	0.109605	0.197025	0.0863804	0.103893	0.0616304	0.148735	0.0588493		0.19825	0.110734		0.0607127	0.0643056	0.0814011	0.220832	0.258246	0.285007	0.235515	0.307808	0.262179	0.0655242	0.130539					0.0660058	0.193019	0.152095
RUS	0.111969	0.204841	0.0890437	0.105704	0.043787	0.152531	0.038452	0.075437	0.202481	0.114135	0.0881847	0.0628358	0.0662415	0.056456	0.226931	0.264645	0.291127	0.2413	0.313338	0.267231	0.0519698	0.132735					0.0681359	0.199485	0.15637
JAM	0.107143	0.190987	0.0916607	0.0996034	0.067285	0.155907	0.0636702		0.195414	0.124002		0.0716679	0.0755575	0.0869676	0.217986	0.259135	0.289846	0.234736	0.318602	0.264612	0.0726966	0.135552					0.0709633	0.222955	0.171534
POL	0.101568	0.197427	0.103205	0.0899682	0.0935093	0.16614	0.0906729		0.18689	0.142558		0.0868024	0.0895466	0.119471	0.216404	0.258138	0.288012	0.231876	0.316968	0.257784	0.0980672	0.134251					0.0828874	0.266118	0.197835
NOR	0.134304	0.276385	0.1181	0.117342	0.0943288	0.203298	0.0864061		0.246725	0.180437		0.112843	0.115343	0.116779	0.290756	0.343196	0.378721	0.308155	0.412078	0.336629	0.107448	0.174386					0.0871395	0.335776	0.240685
PRK	0.119096	0.191753	0.109674	0.107831	0.0850342	0.191355	0.0787822		0.221434	0.169391		0.10557	0.11209	0.106228	0.240369	0.299701	0.349277	0.267712	0.402653	0.316626	0.0947822	0.173627					0.0840047	0.316291	0.236391
ARM	0.111297	0.201512	0.088726	0.104902	0.0637816	0.152705	0.0606652	0.07681	0.201603	0.11562	0.0906539	0.0643063	0.0678993	0.0837397	0.22528	0.263911	0.291558	0.240342	0.315455	0.267523	0.0682661	0.133815					0.0676955	0.202996	0.158545
BLR	0.153887	0.244461	0.127271	0.140429	0.0996322	0.233728	0.0910819		0.285626	0.207022		0.129413	0.138027	0.124188	0.307276	0.382787	0.446406	0.342286	0.514695	0.405795	0.112887	0.222685					0.0924317	0.38334	0.284914
BRN	0.101557	0.191782	0.0861902	0.0947464	0.0619247	0.143537	0.0590947		0.183892	0.109321		0.0610204	0.0636914	0.0809331	0.209048	0.243273	0.266549	0.221479	0.285801	0.243305	0.0661376	0.12059					0.0673651	0.193646	0.150351
FIN	0.151907	0.303786	0.117674	0.141233	0.0959472	0.201799	0.0924891	0.0908948	0.273633	0.152543	0.10495	0.0847405	0.0873551	0.126326	0.315636	0.361102	0.389085	0.329502	0.409012	0.353911	0.100995	0.172465					0.08803	0.266536	0.203499
BGD	0.109513	0.19116	0.0903838	0.102795	0.0658972	0.155671	0.0624973		0.199412	0.121605		0.0693385	0.0735619	0.0857824	0.220498	0.262103	0.293527	0.237822	0.322823	0.269129	0.0708405	0.137537					0.0694207	0.216599	0.168233
PRT	0.103415	0.198123	0.109612	0.0933331	0.0895584	0.170367	0.0873185		0.189299	0.139452		0.0818587	0.0847072	0.115615	0.217412	0.257519	0.285981	0.232311	0.312551	0.25771	0.0929871	0.132325					0.0913752	0.257898	0.197078
GHA	0.118668	0.197189	0.0867786	0.111696	0.0702619	0.161291	0.0662095		0.216856	0.129472		0.0757433	0.0811847	0.0910955	0.235771	0.283993	0.322242	0.257092	0.359668	0.296097	0.0761227	0.154127					0.061801	0.230046	0.176073
UGA	0.104622	0.176001	0.061604	0.0986753	0.0638927	0.128419	0.0608371		0.190836	0.103526		0.0612824	0.0658469	0.0833365	0.208594	0.249946	0.282189	0.22664	0.313085	0.259463	0.0682267	0.133705					0.0371502	0.180555	0.134962
ALB	0.12566	0.233475	0.0954481	0.118021	0.068907	0.167677	0.0649416		0.227307	0.127523		0.0713008	0.0748938	0.0902106	0.255865	0.297985	0.327244	0.271472	0.351722	0.299597	0.0747549	0.149113					0.0707722	0.223011	0.172138
SWZ	0.0944232	0.157602	0.068989	0.0889959	0.0605587	0.127729	0.0580437		0.172417	0.10142		0.0589129	0.0631362	0.0790312	0.188391	0.226355	0.256105	0.205152	0.284822	0.235479	0.0640826	0.121509					0.0492151	0.179641	0.137939
KAZ	0.108197	0.201102	0.0851536	0.102423	0.060294	0.145181	0.0576935		0.195135	0.106419		0.0575568	0.0605238	0.0798716	0.219841	0.254521	0.278029	0.232544	0.296602	0.255404	0.06396	0.125263					0.0652384	0.184407	0.145401
SLV	0.110551	0.192197	0.0969308	0.101857	0.0724494	0.166055	0.0680643		0.202798	0.137063		0.0814312	0.0859958	0.0925687	0.224734	0.270882	0.306686	0.244312	0.342102	0.279218	0.0791369	0.146154					0.0748071	0.249844	0.190067
KOR	0.106249	0.209754	0.096173	0.0936719	0.0789883	0.163767	0.0735405	0.0965184	0.195496	0.143643	0.113916	0.0891179	0.0917594	0.098721	0.227552	0.270842	0.301435	0.243201	0.330932	0.269218	0.0879315	0.140102					0.0724973	0.26721	0.194253
SUR	0.11141	0.188017	0.0758378	0.104295	0.0687434	0.146939	0.0649332		0.203728	0.120047		0.0713864	0.0762972	0.0888886	0.223003	0.268355	0.303959	0.242773	0.338742	0.278615	0.0743236	0.144894					0.050918	0.213191	0.160342
LAO	0.118159	0.193708	0.0992089	0.109999	0.0744106	0.174678	0.069746		0.217099	0.144074		0.0856383	0.0914367	0.0952944	0.235631	0.287107	0.328803	0.258818	0.371146	0.300925	0.0813538	0.159405					0.0752815	0.261561	0.200205
GTM	0.105306	0.194913	0.0915087	0.097289	0.0670586	0.153681	0.0634571		0.191783	0.122144		0.0705406	0.0737868	0.0865312	0.21684	0.255753	0.283654	0.231799	0.308904	0.258077	0.0725561	0.130938					0.0711953	0.219903	0.168321
COG	0.116805	0.195589	0.0854837	0.108101	0.0750587	0.16209	0.0702863		0.214668	0.137028		0.0833139	0.0887553	0.0958197	0.234784	0.285399	0.325895	0.257144	0.366875	0.297462	0.0822611	0.157345					0.0590975	0.247704	0.184785
THA	0.0985075	0.182448	0.0642268	0.0914078	0.063078	0.12463	0.0601015		0.179104	0.100176		0.0590307	0.0619977	0.0818642	0.202614	0.238192	0.263419	0.216216	0.285747	0.240081	0.0675595	0.120887	0.145874	0.174598	0.23692	0.310577	0.0417069	0.176174	0.130326
NLD	0.0933245	0.18601	0.114139	0.0793034	0.0990752	0.174572	0.0954215	0.120638	0.173758	0.157714	0.132605	0.0989857	0.101486	0.124405	0.204452	0.247853	0.279566	0.220652	0.312432	0.246896	0.105269	0.132411					0.0957869	0.302435	0.222525
HTI	0.116129	0.181793	0.101051	0.10762	0.0767708	0.177992	0.0717893		0.214614	0.150711		0.0912288	0.0977486	0.0975524	0.230121	0.284978	0.330982	0.255889	0.379451	0.302713	0.0842342	0.163606					0.0771893	0.276681	0.211008
URY	0.0792771	0.141656	0.0648819	0.0723532	0.0605115	0.115268	0.0580188		0.145591	0.0968039		0.0585292	0.0614962	0.0775764	0.164008	0.197154	0.222153	0.177752	0.246558	0.201484	0.064362	0.104495					0.0475921	0.176531	0.13159
PHL	0.102675	0.187997	0.0755636	0.0972047	0.0590341	0.134017	0.0566564		0.185467	0.0994783		0.0546002	0.0576618	0.0781147	0.208099	0.242104	0.265723	0.221002	0.285091	0.244214	0.0623526	0.120509					0.0555425	0.171968	0.134189
LKA	0.123284	0.197066	0.103002	0.114638	0.0779315	0.183465	0.0727387		0.227126	0.153505		0.0922206	0.0987404	0.0993575	0.244597	0.300467	0.346648	0.270354	0.39448	0.317281	0.0856869	0.1699					0.0775275	0.279795	0.213416
CIV	0.100139	0.178907	0.0690979	0.0946064	0.0596927	0.128374	0.0572434		0.181487	0.0979687		0.0552287	0.0586343	0.07859	0.2022	0.237479	0.26301	0.21629	0.285302	0.241665	0.0631294	0.120936					0.0482753	0.170001	0.13067
KWT	0.0811798	0.146145	0.0768425	0.0760885	0.054855	0.122629	0.0532003		0.14749	0.0929529		0.051508	0.0542108	0.0719606	0.165643	0.195123	0.216339	0.17743	0.235085	0.198147	0.0571828	0.0992296	0.15284	0.176006	0.191856	0.251076	0.0631605	0.166373	0.131839
AUT	0.0994461	0.186881	0.105978	0.0934374	0.0768791	0.157893	0.0765748		0.179678	0.115434		0.0614727	0.0640873	0.102336	0.203736	0.236278	0.258215	0.215541	0.275789	0.236412	0.076851	0.116258					0.0921172	0.206558	0.167602
MYS	0.107759	0.204299	0.0637638	0.0998977	0.0660052	0.129755	0.0625332		0.195502	0.104341		0.0616991	0.0645476	0.0856424	0.222575	0.259835	0.285418	0.236119	0.307187	0.259833	0.071287	0.12982					0.0381284	0.181721	0.132367
ZMB	0.108279	0.175681	0.079479	0.101009	0.07001	0.150343	0.0660465		0.198989	0.125445		0.0755708	0.0810122	0.0899348	0.215534	0.263033	0.301669	0.237163	0.340972	0.276393	0.0758453	0.146353					0.0555503	0.225944	0.17043
LBR	0.113363	0.1865	0.0807913	0.106022	0.0707616	0.154128	0.0666591		0.207865	0.127266		0.0761445	0.081586	0.0911429	0.225781	0.27396	0.31269	0.247387	0.351492	0.286672	0.0767841	0.150756					0.0557279	0.227797	0.171912
MEX	0.0969143	0.176739	0.0633283	0.0907797	0.0603315	0.121771	0.0577846	0.102772	0.17586	0.0952676	0.103401	0.0549604	0.0580221	0.0789349	0.197661	0.232013	0.256493	0.211026	0.277857	0.234742	0.0640354	0.117567	0.140185	0.167301	0.221822	0.291211	0.0419145	0.165947	0.124741
MLI	0.090846	0.139116	0.0772284	0.0834259	0.0685751	0.139934	0.0649146		0.168795	0.122371		0.0758904	0.0813318	0.0869559	0.181022	0.22678	0.265611	0.202961	0.307389	0.242305	0.0740862	0.132343					0.0572257	0.226456	0.170168
BOL	0.124715	0.211952	0.0928315	0.113269	0.0845898	0.177901	0.0783462		0.230476	0.157785		0.0990579	0.104856	0.106234	0.25387	0.311023	0.35698	0.278896	0.404797	0.323497	0.094335	0.173855					0.0629205	0.289838	0.211513
SLE	0.111556	0.182308	0.079579	0.104497	0.0697517	0.151723	0.0658115		0.204554	0.124946		0.0746112	0.0800526	0.0899569	0.221733	0.269283	0.307646	0.243196	0.346132	0.282266	0.0755012	0.148483					0.0550277	0.223481	0.169058
FJI	0.105124	0.188722	0.0955171	0.0961008	0.0713461	0.160619	0.0671239		0.192804	0.133095		0.0792436	0.0831332	0.0909287	0.216296	0.259446	0.292079	0.233939	0.323931	0.26494	0.0778954	0.137955					0.0746322	0.243685	0.184606
VNM	0.104385	0.189938	0.0811977	0.0973053	0.0646058	0.143365	0.0613891		0.189797	0.112766		0.0648514	0.068257	0.0839642	0.213093	0.251174	0.27871	0.228034	0.303432	0.254582	0.0693903	0.128694					0.0600276	0.200179	0.152865
NIC	0.110821	0.194956	0.0699242	0.10333	0.0682643	0.140121	0.0644983		0.20215	0.114528		0.068327	0.0725504	0.0883075	0.224319	0.267233	0.299657	0.242079	0.330269	0.273971	0.0738602	0.14074					0.044142	0.201956	0.149602
CAN	0.0940376	0.186105	0.11162	0.0810648	0.0785147	0.17106	0.0731917	0.116587	0.174363	0.151293	0.127142	0.0936831	0.0961833	0.0971657	0.204224	0.246131	0.276485	0.219802	0.307253	0.24525	0.0874095	0.130122					0.0936206	0.288074	0.213576
NGA	0.105202	0.174711	0.0769683	0.0982451	0.0676208	0.144534	0.0640114		0.192848	0.118954		0.070965	0.0758757	0.0872048	0.21038	0.254793	0.290191	0.230136	0.325449	0.265858	0.0729155	0.139323					0.0540025	0.213223	0.161193
BHS	0.0967857	0.171081	0.0935884	0.0878026	0.0703362	0.154729	0.0663081		0.178293	0.130611		0.0787014	0.0825911	0.0891743	0.199612	0.24176	0.274341	0.217338	0.307163	0.248308	0.0766405	0.130945					0.0745321	0.241744	0.182874
TJK	0.114462	0.196898	0.0901411	0.108406	0.0652605	0.157894	0.061949		0.207995	0.120975		0.0679699	0.0725344	0.085586	0.228377	0.271002	0.303386	0.246361	0.333255	0.279266	0.0699326	0.142144					0.0682815	0.213025	0.16687
BLZ	0.117201	0.203896	0.102312	0.107358	0.077229	0.176914	0.0721008		0.215438	0.148674		0.0895023	0.0944131	0.0980364	0.238837	0.28894	0.32808	0.26013	0.367363	0.298041	0.0851435	0.157176					0.0781544	0.272329	0.205397
PNG	0.108854	0.189152	0.0889082	0.102596	0.0644996	0.153328	0.0613153		0.197989	0.118442		0.0669369	0.0711602	0.0843014	0.218461	0.259301	0.290127	0.235524	0.318624	0.266481	0.0690572	0.135728					0.0682824	0.209957	0.163967
ESP	0.0980579	0.188248	0.125023	0.0859358	0.0951248	0.184545	0.0920705	0.103297	0.181359	0.157754	0.119243	0.0951196	0.0980867	0.120827	0.209618	0.252691	0.284427	0.226165	0.316435	0.253839	0.100098	0.134305	0.236697	0.276153	0.227331	0.329133	0.108971	0.299492	0.227715
JPN	0.160888	0.321884	0.156924	0.150114	0.0973931	0.240246	0.0936757	0.139779	0.289396	0.176153	0.13767	0.0942017	0.0969045	0.128587	0.333455	0.380462	0.409045	0.347553	0.428675	0.37258	0.102786	0.180776					0.13201	0.312159	0.248285
DOM	0.104551	0.189239	0.0914709	0.096702	0.0672521	0.154051	0.0636411		0.190763	0.123264		0.0715422	0.0751352	0.0866878	0.214122	0.254178	0.283709	0.230121	0.311239	0.258405	0.0727304	0.132227					0.0712921	0.222537	0.170578
DZA	0.0945222	0.167915	0.0697175	0.0883536	0.0609234	0.12713	0.0583144		0.172113	0.100598		0.0582841	0.0616898	0.0793548	0.192003	0.227603	0.253958	0.206537	0.278173	0.232394	0.0647263	0.118034	0.148516	0.177353	0.215073	0.288794	0.0498471	0.178103	0.135491
TUR	0.139769	0.266049	0.112227	0.127574	0.0842026	0.197437	0.0778575		0.254907	0.162917		0.0969985	0.100888	0.10704	0.290339	0.342161	0.378906	0.309397	0.412487	0.342803	0.0941777	0.175325	0.233738	0.277771	0.311042	0.42436	0.0824769	0.294394	0.218939
IRN	0.10366	0.176021	0.0918961	0.0961875	0.0681883	0.156303	0.0644844	0.121851	0.190087	0.127294	0.129279	0.0748498	0.0794143	0.0876283	0.209076	0.252611	0.286831	0.228026	0.320771	0.262006	0.0737207	0.137098					0.0717852	0.231368	0.177899
COL	0.093316	0.170161	0.0679906	0.0864293	0.0621144	0.125182	0.0593141		0.170063	0.10096		0.0594159	0.0624775	0.0804379	0.191672	0.226748	0.252203	0.205523	0.275459	0.229809	0.0663294	0.116655					0.0476395	0.179705	0.134617
FLK	0.153531	0.292505	0.102199	0.145655	0.072588	0.187808	0.0679277		0.275874	0.136526		0.0736693	0.0772683	0.0963862	0.311772	0.357416	0.387014	0.327181	0.408491	0.355523	0.0793385	0.172861					0.0713667	0.231028	0.17891
SWE	0.0947999	0.179169	0.0896176	0.088186	0.0778768	0.142239	0.0774381	0.0543749	0.171843	0.108181	0.0694632	0.0600707	0.0625709	0.10294	0.195741	0.228181	0.250293	0.207588	0.268782	0.228214	0.0781711	0.113293					0.0734482	0.193702	0.152031
GMB	0.0910446	0.153675	0.0665444	0.0860053	0.0583506	0.1223	0.0561722		0.165936	0.0956949		0.0549587	0.0588484	0.0764655	0.181965	0.217542	0.245011	0.197456	0.270997	0.225436	0.0613473	0.115367					0.047766	0.168657	0.130146
AUS	0.0926616	0.184895	0.105445	0.0784292	0.081999	0.167162	0.0761531		0.172734	0.153949		0.0980361	0.100536	0.100595	0.203463	0.247107	0.279093	0.219795	0.312448	0.246199	0.0918684	0.132442	0.224325	0.266051	0.281979	0.389987	0.0854693	0.29503	0.214029
HND	0.107024	0.192181	0.0947519	0.0984072	0.0703766	0.16025	0.0662925		0.195858	0.13096		0.0772199	0.0811096	0.0901064	0.219442	0.262195	0.294301	0.236823	0.325135	0.267515	0.0766482	0.138409					0.0736261	0.238221	0.181242
QAT	0.0816201	0.147409	0.0760836	0.0767867	0.0540248	0.121593	0.0524913		0.14803	0.0909702		0.0498593	0.0525008	0.0711487	0.166283	0.195163	0.21572	0.177715	0.233472	0.197859	0.0561334	0.0984662					0.0624324	0.161876	0.128892
CRI	0.109991	0.201982	0.0953906	0.101196	0.0705615	0.161672	0.0664209		0.200785	0.130853		0.0766403	0.0802333	0.0905322	0.226452	0.268541	0.299298	0.242935	0.327958	0.271936	0.0769365	0.139324					0.073631	0.236854	0.180013
BIH	0.146013	0.267381	0.105488	0.137024	0.0770977	0.191608	0.0718333		0.264581	0.148423		0.0843695	0.0889341	0.10039	0.295879	0.346469	0.382655	0.315177	0.414185	0.350308	0.0849254	0.1763					0.0755361	0.259839	0.19854
MDA	0.122101	0.216951	0.100293	0.113112	0.0745365	0.175195	0.0697778		0.223041	0.142053		0.083414	0.0879786	0.0956998	0.248219	0.296112	0.332298	0.267822	0.366829	0.302952	0.0817546	0.156519					0.0755361	0.255921	0.194622
CHE	0.137995	0.286216	0.127604	0.119511	0.0991142	0.215756	0.0904461	0.0713815	0.254058	0.19363	0.112507	0.121792	0.124292	0.121975	0.300509	0.355653	0.393151	0.318752	0.428962	0.34838	0.113548	0.181621					0.095985	0.362822	0.259871
RWA	0.101059	0.171258	0.0697015	0.0958834	0.0605434	0.131249	0.0579985		0.183793	0.101554		0.0578785	0.0621018	0.0795931	0.201221	0.239555	0.268979	0.21775	0.29638	0.247886	0.0640346	0.126307					0.0485924	0.177153	0.136752
FRA	0.0992203	0.195013	0.13448	0.0863377	0.0967965	0.193548	0.0934685	0.0662016	0.183504	0.165018	0.0951676	0.0991258	0.101797	0.12261	0.213943	0.257027	0.288174	0.229958	0.319353	0.256389	0.102294	0.13533	0.260549	0.30021	0.269477	0.371976	0.119318	0.31455	0.239907
PAK	0.118928	0.200361	0.100962	0.110003	0.0759212	0.176731	0.0710073	0.0957143	0.218488	0.146807	0.121886	0.0876956	0.093137	0.0968828	0.239361	0.290546	0.331327	0.261822	0.372463	0.302307	0.0833542	0.159705					0.0766551	0.267338	0.203281
IRL	0.101884	0.200188	0.123777	0.0893313	0.0961309	0.185202	0.0928911		0.187933	0.157996		0.0952606	0.0979317	0.122164	0.218734	0.261623	0.292342	0.234521	0.322555	0.260702	0.101432	0.136628					0.106283	0.298699	0.225759
LUX	0.1069	0.215401	0.122798	0.0923138	0.10216	0.189692	0.0979713		0.197684	0.167206		0.103342	0.105842	0.128729	0.232401	0.278182	0.310628	0.248759	0.342874	0.275431	0.109153	0.145195					0.102003	0.317263	0.234434
LVA	0.103241	0.195705	0.105156	0.0946846	0.0851398	0.163975	0.0835724		0.188073	0.129499		0.073976	0.0768246	0.111099	0.214664	0.252458	0.278942	0.228672	0.30261	0.252914	0.0873407	0.127991					0.0876011	0.236205	0.183262
BWA	0.0807362	0.143514	0.0624634	0.0757003	0.054966	0.110482	0.0533035		0.146851	0.0857043		0.048842	0.0516905	0.0720457	0.164272	0.19424	0.216161	0.176507	0.23591	0.198078	0.0572946	0.0997081					0.0462256	0.151516	0.116745
LBN	0.146097	0.225677	0.120506	0.134391	0.0937455	0.221178	0.0861279		0.271033	0.19357		0.120059	0.128672	0.117514	0.288992	0.360992	0.42234	0.323076	0.488249	0.385256	0.105397	0.211429					0.0880981	0.357187	0.267807
MNG	0.0959189	0.163656	0.0899408	0.0883335	0.0669411	0.149904	0.0634487		0.17632	0.123613		0.0732701	0.0774935	0.0856627	0.194766	0.236142	0.268689	0.212771	0.301352	0.244735	0.0722329	0.128672					0.071565	0.226682	0.173839
NAM	0.089583	0.154853	0.0726765	0.0813726	0.0673367	0.131998	0.0637995		0.165313	0.114413		0.0706653	0.0745549	0.085492	0.18404	0.224215	0.255795	0.201406	0.28804	0.23179	0.0728379	0.122865					0.0523772	0.210366	0.155485
IND	0.106311	0.193869	0.068386	0.101433	0.0579117	0.129013	0.0556911	0.080561	0.191527	0.0937556	0.0861271	0.0507712	0.0539229	0.0772944	0.214168	0.248076	0.271407	0.22697	0.289834	0.250287	0.0608827	0.122506	0.139572	0.164435	0.199971	0.263403	0.046625	0.158281	0.123239
TZA	0.0998481	0.17314	0.0703927	0.0941401	0.0612214	0.131091	0.0585638		0.181633	0.102381		0.0587614	0.0626511	0.0801561	0.200564	0.238138	0.266474	0.216334	0.292636	0.244821	0.0649785	0.124486					0.0494197	0.179592	0.137629
MAR	0.0891863	0.159858	0.0713456	0.0819581	0.0630592	0.127099	0.0601441		0.163304	0.104949		0.0626682	0.0659144	0.0810545	0.183472	0.219382	0.246262	0.198175	0.272025	0.223855	0.067514	0.115439	0.150136	0.180473	0.20436	0.2821	0.0522329	0.189912	0.1424
NER	0.0918391	0.137698	0.0780286	0.0840536	0.0705124	0.142796	0.0665686		0.17115	0.126849		0.079495	0.0852935	0.089033	0.182583	0.230528	0.271739	0.205886	0.316668	0.247709	0.0764848	0.136604					0.0573431	0.235777	0.176353
PRY	0.0922998	0.168521	0.0711687	0.0842938	0.0654291	0.129494	0.0621341		0.169076	0.10858		0.065644	0.0687957	0.0837326	0.19116	0.228187	0.255572	0.205972	0.281751	0.23166	0.0705502	0.119503					0.0505402	0.196762	0.145573
OMN	0.0962658	0.180281	0.0990975	0.0849497	0.0756037	0.161038	0.0707474		0.178074	0.141157		0.087208	0.0904542	0.094449	0.204013	0.246863	0.279041	0.221018	0.311748	0.249799	0.0835157	0.13252					0.0793554	0.265264	0.196649
SVN	0.129762	0.256178	0.1207	0.117827	0.0977228	0.196067	0.0941136	0.0863938	0.23619	0.1585	0.106943	0.0924741	0.0953226	0.126224	0.272841	0.318703	0.349566	0.288489	0.37638	0.315293	0.103308	0.159209					0.0959576	0.28852	0.218134
VEN	0.155565	0.248363	0.111103	0.141835	0.100594	0.221206	0.0918891		0.288704	0.199854		0.127074	0.135687	0.125314	0.311046	0.387153	0.451124	0.346193	0.519722	0.409908	0.114109	0.224817					0.0726124	0.368004	0.268178
MKD	0.130291	0.243549	0.0971196	0.122422	0.0700658	0.1718	0.0659018		0.23549	0.130249		0.0726723	0.0762653	0.091794	0.265456	0.308444	0.338	0.281138	0.362338	0.309438	0.076216	0.153575					0.0713408	0.227034	0.174973
AZE	0.112992	0.21039	0.091598	0.105522	0.0663079	0.156714	0.062783		0.204807	0.120648		0.0680303	0.0712765	0.0864355	0.231303	0.270262	0.297456	0.245844	0.320695	0.271708	0.0715637	0.135798					0.0698451	0.213412	0.164648
ZWE	0.106844	0.173451	0.0808869	0.0989794	0.071569	0.151799	0.0673755		0.196854	0.128919		0.0785791	0.0840206	0.0913979	0.213607	0.261836	0.301242	0.235601	0.341863	0.275283	0.0778438	0.146796					0.0570194	0.234143	0.175562
ISR	0.0902017	0.168729	0.093263	0.0802762	0.0703358	0.149892	0.0662966		0.166384	0.128575		0.0782623	0.0812293	0.0885346	0.190504	0.229391	0.258281	0.205865	0.287066	0.231874	0.0768707	0.121775					0.0755051	0.240394	0.179957
CZE	0.105626	0.202047	0.0854919	0.0975623	0.0835875	0.147032	0.0822361	0.0863877	0.191718	0.115719	0.0953543	0.0665047	0.0691757	0.109712	0.219129	0.255696	0.280596	0.232242	0.301738	0.255018	0.0853857	0.127396					0.0642999	0.206247	0.156483
CYP	0.128975	0.252078	0.115274	0.118855	0.0924054	0.188067	0.0896083		0.233724	0.146507		0.0830758	0.0859243	0.120739	0.268416	0.311462	0.339973	0.283011	0.363408	0.308439	0.096516	0.153574					0.091469	0.262624	0.201608
SEN	0.0882851	0.149042	0.0551629	0.0823623	0.0606022	0.112647	0.058095		0.161676	0.0934739		0.0564763	0.0603659	0.078519	0.177855	0.214447	0.243062	0.193898	0.271087	0.222547	0.0642368	0.11551					0.0341678	0.165757	0.122685
COD	0.105377	0.178151	0.0890545	0.0990151	0.0651707	0.152917	0.0619171		0.192399	0.120543		0.0691878	0.0737523	0.084704	0.210752	0.252813	0.285594	0.229031	0.31719	0.262169	0.0698568	0.13547					0.0690391	0.215886	0.168149
GEO	0.107197	0.19211	0.0813871	0.102916	0.0568404	0.140353	0.0547903		0.192991	0.0995084		0.0522121	0.0556178	0.0762988	0.214298	0.248493	0.272402	0.227566	0.291411	0.251992	0.0594539	0.123338					0.0621932	0.169549	0.136678
IDN	0.101361	0.188308	0.0819209	0.093596	0.0655089	0.142546	0.0621534		0.184571	0.114024		0.0663892	0.0694509	0.0845958	0.209089	0.246392	0.272986	0.223351	0.296915	0.248304	0.0706331	0.125722					0.061217	0.204326	0.154703
ROU	0.125156	0.241737	0.117313	0.114229	0.0949827	0.190137	0.0918267	0.0826141	0.227919	0.152831	0.103748	0.0887428	0.0918945	0.123055	0.261242	0.306361	0.337531	0.277343	0.365181	0.305247	0.0997593	0.154703					0.0939098	0.277937	0.211672
GUY	0.10162	0.187924	0.0678972	0.0953315	0.0610737	0.127995	0.0583866		0.184022	0.0986333		0.0561445	0.0591115	0.0800935	0.207543	0.242254	0.26643	0.22063	0.286814	0.243881	0.0649846	0.121236					0.0460215	0.171176	0.129513
MOZ	0.111756	0.184166	0.0783712	0.103628	0.0728562	0.152544	0.0684432		0.205548	0.129588		0.0791824	0.0846238	0.0931366	0.223814	0.272993	0.312742	0.2459	0.353252	0.285782	0.0794679	0.151585					0.0525289	0.23381	0.173866
NPL	0.104336	0.18697	0.0875122	0.0978382	0.0633331	0.14835	0.0603188		0.189573	0.114435		0.0645599	0.0681529	0.082677	0.211568	0.249569	0.277349	0.226778	0.302317	0.254038	0.0677228	0.128339					0.0679503	0.203318	0.158336
PAN	0.103089	0.191037	0.090318	0.0952595	0.0660745	0.15096	0.0626289		0.187712	0.119681		0.0689677	0.0721194	0.0853289	0.212386	0.250364	0.277519	0.226956	0.302005	0.252511	0.0713287	0.127943					0.0705924	0.215478	0.165203
ISL	0.17199	0.349541	0.122167	0.158058	0.0900736	0.221302	0.0826235		0.310592	0.174542		0.100766	0.103469	0.115739	0.360551	0.413554	0.446231	0.376355	0.470518	0.403778	0.101803	0.198632					0.0850262	0.30677	0.226592
CHL	0.0772564	0.140554	0.0659867	0.0698252	0.0612717	0.115353	0.0586627		0.142136	0.0982641		0.0599506	0.0626948	0.0781584	0.16139	0.194119	0.21859	0.174732	0.24261	0.197478	0.0653912	0.102692	0.142823	0.171187	0.200579	0.273411	0.0490712	0.180627	0.133864
SAU	0.0951582	0.185504	0.100349	0.0829771	0.0767245	0.16122	0.0716762		0.176024	0.142483		0.0884826	0.0911537	0.095452	0.204743	0.246315	0.276553	0.220399	0.306898	0.246298	0.0850794	0.130044	0.205887	0.244048	0.245808	0.344377	0.0806475	0.268845	0.197823
YEM	0.127175	0.208791	0.111429	0.11591	0.0858995	0.196901	0.0794767		0.235469	0.171544		0.105893	0.112412	0.107813	0.256472	0.316715	0.366291	0.283712	0.418653	0.332626	0.0958535	0.18031					0.0840047	0.317614	0.237715
BEL	0.100989	0.200154	0.119919	0.087057	0.100012	0.18372	0.0961871	0.107437	0.187212	0.162568	0.124877	0.100662	0.103333	0.12604	0.21912	0.263981	0.296488	0.235726	0.329457	0.262954	0.106397	0.139676					0.100636	0.309532	0.229471
USA	0.0841403	0.159064	0.09353	0.0757583	0.0588185	0.143136	0.0550687	0.0635132	0.154394	0.11742	0.0801809	0.0690134	0.0715135	0.0742918	0.177276	0.21117	0.235574	0.190293	0.258788	0.21226	0.0648612	0.109329	0.180263	0.209489	0.192715	0.267938	0.0791334	0.218303	0.167504
UKR	0.138055	0.23123	0.121379	0.127167	0.0859773	0.210228	0.0794896	0.0844239	0.254142	0.176691	0.126863	0.106288	0.112808	0.108839	0.277565	0.338468	0.387555	0.304445	0.437828	0.353073	0.0959062	0.188275					0.0933391	0.323793	0.245841
SLB	0.113077	0.191193	0.0927836	0.106216	0.0681906	0.161828	0.0644563		0.206472	0.128219		0.0739498	0.0788605	0.0884707	0.225928	0.271087	0.306362	0.245528	0.340449	0.281178	0.07361	0.145577					0.0707805	0.229324	0.177784
GBR	0.0970207	0.192193	0.132375	0.0827848	0.0828484	0.192866	0.0768601	0.110541	0.180501	0.170215	0.127719	0.104803	0.107474	0.101852	0.211688	0.256557	0.289458	0.228522	0.323506	0.255979	0.0928978	0.137226					0.116104	0.32717	0.245541
SYR	0.119044	0.166814	0.110732	0.108684	0.0869675	0.197077	0.0805118		0.223223	0.177626		0.112032	0.120645	0.108255	0.232953	0.299881	0.359484	0.266594	0.42621	0.327754	0.0968507	0.185353					0.0847697	0.333648	0.251216
MNE	0.136	0.254712	0.10411	0.126325	0.0765313	0.184489	0.0713706		0.246834	0.145549		0.0838393	0.0877289	0.0988976	0.27886	0.32647	0.359948	0.296491	0.389173	0.327986	0.0843898	0.165286					0.0762432	0.257992	0.19555
BEN	0.101716	0.177262	0.0711926	0.0958718	0.0618139	0.132933	0.0590571		0.18496	0.103762		0.0595385	0.0634282	0.0809222	0.204501	0.24249	0.271002	0.220327	0.29719	0.248916	0.0657277	0.126405					0.0497563	0.181831	0.139165
LBY	0.0845225	0.151473	0.066277	0.0785255	0.0584011	0.117569	0.0562036		0.154143	0.0937752		0.0546014	0.0575684	0.0758831	0.173005	0.20535	0.229148	0.18614	0.251119	0.209169	0.0616423	0.10629					0.048777	0.167535	0.127378
BFA	0.101624	0.167058	0.0759603	0.0947469	0.0670077	0.141751	0.063509		0.186584	0.117483		0.0704106	0.0753214	0.0862689	0.203123	0.247013	0.282308	0.222878	0.317862	0.258539	0.0721473	0.136144					0.0538053	0.211505	0.159887
PSE	0.126038	0.186092	0.122006	0.112308	0.0974311	0.215726	0.0893509		0.23741	0.201363		0.1297	0.138313	0.119523	0.252194	0.324972	0.388943	0.287718	0.461246	0.351433	0.110193	0.200391					0.0931023	0.382627	0.282801
GRC	0.12038	0.230206	0.112026	0.109758	0.0937999	0.18302	0.0908514		0.219546	0.148326		0.0867215	0.0899677	0.121441	0.250985	0.295512	0.326791	0.267277	0.355141	0.295531	0.0982474	0.150563					0.089115	0.270262	0.20523
ARG	0.127187	0.20735	0.0909797	0.117014	0.0827518	0.177656	0.0768073	0.107308	0.23483	0.155097	0.139857	0.0964566	0.102976	0.104607	0.254779	0.313382	0.361543	0.28138	0.41181	0.329465	0.0918306	0.177322					0.0608464	0.282681	0.20842
IRQ	0.105669	0.17842	0.0973174	0.0966854	0.0735152	0.165465	0.0690076		0.194885	0.140021		0.0846049	0.0895156	0.0932498	0.2145	0.262011	0.300036	0.235436	0.339119	0.272695	0.0804466	0.145275					0.0760283	0.258235	0.195741
MDG	0.0924516	0.153926	0.0696004	0.0866652	0.061383	0.127852	0.0587523		0.169209	0.103227		0.0606875	0.0649109	0.0796992	0.185026	0.223307	0.253523	0.202022	0.283175	0.232622	0.0651445	0.120864					0.0501033	0.184416	0.140861
CMR	0.107679	0.179752	0.0771104	0.100859	0.0674917	0.145672	0.0638899		0.197069	0.118725		0.0703579	0.0752686	0.0872889	0.215103	0.25959	0.29481	0.234747	0.329495	0.270365	0.0727399	0.140997					0.0536641	0.211687	0.160363
GAB	0.118091	0.198367	0.0931264	0.109337	0.0753385	0.169341	0.0705173		0.216931	0.141599		0.0852065	0.0906479	0.0962165	0.237424	0.288258	0.328818	0.259796	0.369731	0.300152	0.0826132	0.158543					0.0677626	0.256729	0.193555
SDN	0.118392	0.165342	0.0960026	0.108104	0.0866897	0.184055	0.0802795		0.222047	0.169201		0.108473	0.117087	0.107916	0.231541	0.298286	0.357796	0.265148	0.424466	0.326253	0.0964986	0.184616					0.0675786	0.316359	0.234299
EGY	0.103113	0.173754	0.0759768	0.09359	0.0747964	0.146845	0.0701065		0.19077	0.130744		0.082375	0.0872858	0.0943324	0.210254	0.258287	0.297011	0.231538	0.337448	0.269206	0.082095	0.144641	0.172223	0.215425	0.257363	0.367952	0.0509223	0.240361	0.175082
AGO	0.1036	0.174554	0.0746121	0.097127	0.0653018	0.139878	0.0620369		0.18938	0.11301		0.066532	0.0710965	0.0846828	0.207386	0.249414	0.282339	0.225753	0.314373	0.258975	0.0700319	0.134306					0.0523019	0.201018	0.152706
CUB	0.134604	0.22446	0.113043	0.123339	0.0866953	0.202	0.0801153		0.248375	0.173523		0.10619	0.112709	0.10927	0.27128	0.332361	0.381937	0.298425	0.433366	0.347339	0.0968387	0.186456					0.0840047	0.318832	0.238932

## Sheet: LCOX_2deg50
	PEM	DAC	AD	AE	ATR_CCS	B_PYR_kerosene	CLR	CuCl	HB	HTL	HTSE	HVO_diesel	HVO_kerosene	M_PYR	PTM	RWGS_FT_diesel	RWGS_FT_kerosene	RWGS_MeOH_methanol	RWGS_MeOH_DME	RWGS_MeOH_kerosene	SMR_CCS	SOEC	SR_FT_diesel	SR_FT_kerosene	ST_FT_diesel	ST_FT_kerosene	TG_CCS	TG_FT_diesel	TG_FT_kerosene
ECU	0.108529	0.198567	0.0837914	0.102796	0.0681137	0.1529	0.0661764		0.203779	0.109585		0.0811921	0.0868945	0.0718163	0.221884	0.231345	0.263049	0.239259	0.330401	0.276949	0.065834	0.1347					0.0501718	0.197011	0.151182
DEU	0.0727171	0.14741	0.112466	0.063939	0.0830831	0.155907	0.0848189		0.139503	0.119507		0.0875983	0.0900727	0.0882631	0.159712	0.167782	0.18912	0.171374	0.23896	0.193034	0.0763212	0.0971456	0.210861	0.238038	0.212406	0.284858	0.0926446	0.231294	0.178816
EST	0.0746202	0.146117	0.0939252	0.0699279	0.0694914	0.133496	0.0732382		0.138799	0.0918008		0.0596237	0.0622963	0.0788693	0.156503	0.160298	0.177417	0.166117	0.216902	0.185408	0.0609268	0.0880236					0.0782962	0.168746	0.138273
MMR	0.102847	0.184176	0.0919077	0.0991396	0.0606927	0.153131	0.059854		0.191818	0.104171		0.0710757	0.0767781	0.0660123	0.20722	0.215236	0.244513	0.223419	0.305434	0.259433	0.057469	0.124316					0.0653162	0.185828	0.150804
MWI	0.0824492	0.141683	0.0705971	0.0792908	0.0565103	0.123096	0.0562961		0.15539	0.0866325		0.0625511	0.0679037	0.0610233	0.166125	0.175446	0.202777	0.181372	0.257754	0.215079	0.0528643	0.104428					0.0468113	0.156608	0.124496
HRV	0.091099	0.182039	0.101247	0.0854206	0.0743307	0.149924	0.0773636		0.168553	0.102396		0.0667251	0.0695402	0.0839432	0.190783	0.193693	0.212414	0.20115	0.257279	0.221938	0.066313	0.104886					0.0806929	0.185357	0.150078
GIN	0.096261	0.171996	0.0734606	0.0929814	0.0577211	0.132271	0.0573392		0.179372	0.0898665		0.0626435	0.0679961	0.0632835	0.193845	0.201253	0.228503	0.208991	0.285067	0.242642	0.0541782	0.115891					0.046632	0.157874	0.126124
SOM	0.0724874	0.118831	0.0766099	0.0677227	0.0626694	0.127909	0.0615095		0.140509	0.0982952		0.0770146	0.082717	0.0643099	0.148474	0.16219	0.193294	0.16571	0.254597	0.202985	0.0598231	0.102916					0.0523284	0.187069	0.143909
NZL	0.070417	0.141836	0.0936128	0.0621993	0.064548	0.137613	0.0633055		0.134936	0.106527		0.0802294	0.0827038	0.0657245	0.154204	0.161982	0.18266	0.16555	0.230656	0.186754	0.0623577	0.0936863					0.0720462	0.20466	0.155117
LTU	0.0735404	0.144737	0.0882842	0.0675294	0.0741784	0.13093	0.0772246		0.138405	0.0949545		0.0668516	0.0695647	0.0820557	0.156478	0.162049	0.181015	0.167019	0.224552	0.187695	0.0662232	0.091158					0.0690834	0.17724	0.139211
ZAF	0.0681623	0.125749	0.0628703	0.0646231	0.0507923	0.103929	0.0515381	0.104658	0.127623	0.0727142	0.0861038	0.0509992	0.0543591	0.0557292	0.140853	0.146461	0.16539	0.15155	0.205869	0.173977	0.0467063	0.0832344	0.120993	0.141679	0.148026	0.199856	0.0441599	0.131347	0.104026
DNK	0.0644117	0.127659	0.121489	0.057272	0.0768686	0.15645	0.0795213		0.123421	0.116155		0.0802983	0.0827727	0.0830411	0.140458	0.147911	0.167346	0.151217	0.211654	0.171563	0.0693301	0.0857601	0.218002	0.242058	0.189823	0.253303	0.108694	0.22588	0.181865
CHN	0.0606268	0.113936	0.0508315	0.0575667	0.0629747	0.0868764	0.0676783	0.0877841	0.112899	0.059802	0.0717583	0.0414354	0.044108	0.0728549	0.125926	0.129954	0.145275	0.134712	0.178738	0.152761	0.0536167	0.072078	0.0997181	0.11645	0.131117	0.173107	0.0340369	0.106169	0.0836988
HUN	0.078897	0.153475	0.0869547	0.0735612	0.0730876	0.131997	0.0762813	0.0696511	0.147481	0.0931682	0.0660305	0.0640319	0.0670555	0.0818054	0.165639	0.170627	0.190078	0.176469	0.234351	0.198333	0.0649295	0.0952099					0.0670192	0.171022	0.135893
BGR	0.0904139	0.178979	0.0986112	0.085453	0.0721396	0.146308	0.0754905	0.0696866	0.166811	0.0982052	0.0645251	0.0625954	0.0655264	0.0823201	0.188085	0.19065	0.209018	0.198307	0.252556	0.219169	0.0638244	0.102902					0.0789958	0.176289	0.144473
SRB	0.0945329	0.185057	0.0886901	0.0892916	0.058258	0.141752	0.057917		0.174972	0.0966919		0.0646719	0.0680318	0.0636733	0.196207	0.199824	0.220429	0.207618	0.26824	0.231202	0.05504	0.109341					0.0648647	0.172348	0.137565
ARE	0.0619824	0.119101	0.079011	0.0571193	0.0527434	0.114964	0.0532404	0.0792954	0.11705	0.0831749	0.0699923	0.0581581	0.0607707	0.0565408	0.131681	0.137356	0.154627	0.141412	0.193053	0.160643	0.0490315	0.0780187	0.145214	0.165319	0.146436	0.198254	0.0634487	0.156058	0.123932
KEN	0.081926	0.144749	0.0985793	0.0784577	0.0559379	0.145634	0.0558396		0.1539	0.100479		0.0671349	0.0719677	0.0606176	0.166267	0.174381	0.199724	0.180416	0.251821	0.21132	0.0522826	0.10208					0.08041	0.18524	0.153444
ETH	0.0986143	0.179244	0.0826443	0.0931732	0.0654302	0.14552	0.0639038		0.18573	0.105003		0.0777063	0.0830589	0.0689512	0.202103	0.211604	0.241507	0.218551	0.304602	0.254034	0.062882	0.123988					0.0524745	0.190736	0.147176
TUN	0.0782814	0.133336	0.0730769	0.0743363	0.0590301	0.124821	0.0584374		0.149028	0.0912654		0.0683096	0.0736622	0.0623728	0.15912	0.169948	0.198329	0.174905	0.255235	0.209336	0.0557288	0.103331					0.049124	0.16878	0.131993
PER	0.0848721	0.165356	0.0608172	0.0814599	0.0499563	0.108351	0.0508684		0.155596	0.0701485		0.0453001	0.0482311	0.0568824	0.174485	0.176124	0.192655	0.183824	0.231169	0.203418	0.0457503	0.0939977					0.038805	0.118572	0.0949298
ITA	0.0888861	0.174532	0.0889726	0.0836783	0.0734825	0.13845	0.0766209		0.16475	0.0949403		0.0633624	0.0664739	0.0830936	0.185218	0.188855	0.20838	0.196061	0.253803	0.218218	0.0653251	0.103358	0.165608	0.187985	0.186409	0.24365	0.0671022	0.170636	0.136612
GRL	0.139451	0.287733	0.0926352	0.13459	0.0574494	0.163313	0.0573098		0.251006	0.097355		0.0546198	0.0573303	0.0677407	0.285907	0.28039	0.2968	0.294896	0.342837	0.313801	0.0540318	0.140887					0.0607784	0.154311	0.127609
SVK	0.0871001	0.172715	0.0981341	0.082019	0.0720098	0.144199	0.0753842	0.145526	0.161013	0.0976295	0.112764	0.0627466	0.0655617	0.0819014	0.181829	0.184658	0.202702	0.191879	0.245463	0.212199	0.0637055	0.0999536					0.0792025	0.176416	0.144151
KHM	0.0880374	0.162171	0.079004	0.0855801	0.0506353	0.127544	0.0513723		0.1622	0.0822276		0.0515008	0.0556606	0.0575707	0.177642	0.181591	0.202492	0.189413	0.247336	0.2154	0.0463488	0.100454					0.0591652	0.142899	0.119859
BRA	0.0770067	0.146174	0.0601135	0.0735434	0.0505419	0.105062	0.0513426	0.0911147	0.142544	0.0707817	0.0764172	0.0480466	0.0512506	0.0564684	0.158549	0.16227	0.180243	0.168699	0.220168	0.190039	0.0464082	0.0892911					0.0392306	0.123475	0.097864
JOR	0.0682676	0.125126	0.0800395	0.0642003	0.0532225	0.120298	0.0535954		0.128686	0.0854059		0.0592497	0.0627929	0.0574343	0.141701	0.148465	0.168887	0.153179	0.212238	0.17714	0.0494291	0.085826					0.0630065	0.158472	0.127495
KGZ	0.0887531	0.161541	0.0815527	0.0859801	0.0528284	0.131794	0.0532193		0.164357	0.0868542		0.0561978	0.0606917	0.0591564	0.17916	0.184409	0.20722	0.191949	0.255454	0.220172	0.048783	0.103744					0.0607132	0.152993	0.126919
UZB	0.0673301	0.12184	0.0747198	0.0645328	0.0487181	0.112788	0.0497601		0.125719	0.0765896		0.0503746	0.0539177	0.0541673	0.137735	0.143204	0.162059	0.148443	0.201613	0.171322	0.0443418	0.0814269					0.059557	0.139144	0.11514
RUS	0.0782813	0.147701	0.0791504	0.0749172	0.0327544	0.122236	0.0299149	0.0686075	0.144913	0.081543	0.0624436	0.0525641	0.055924	0.0339281	0.160726	0.164634	0.183174	0.171187	0.224045	0.193345	0.0339175	0.0908754					0.0613526	0.145392	0.1198
JAM	0.0876805	0.165386	0.084312	0.0836263	0.0551896	0.134003	0.0552691		0.162707	0.090746		0.0602813	0.0641147	0.0607712	0.179987	0.184767	0.206172	0.191933	0.253305	0.21737	0.0515388	0.102982					0.0628668	0.162073	0.131459
POL	0.0747026	0.148092	0.0926183	0.0678544	0.0771785	0.136843	0.0797794		0.141301	0.101258		0.0728331	0.0755462	0.0842864	0.160176	0.16652	0.186509	0.171218	0.232599	0.192601	0.0696094	0.0944956					0.0722057	0.190783	0.148198
NOR	0.0956063	0.199124	0.102905	0.0851086	0.0739723	0.161919	0.0713506		0.180858	0.124129		0.0939262	0.0964007	0.0749272	0.208159	0.214774	0.237868	0.220589	0.294781	0.243462	0.0729097	0.120501					0.0722877	0.233542	0.173243
PRK	0.0893353	0.150735	0.0980231	0.0841472	0.0673282	0.1573	0.0654494		0.171305	0.116859		0.0875199	0.0939294	0.0692353	0.181818	0.19574	0.230335	0.200865	0.299467	0.242499	0.0649391	0.121522					0.0713747	0.220164	0.173108
ARM	0.087246	0.166047	0.0809194	0.0837642	0.0522505	0.1288	0.052785	0.0698118	0.16084	0.0847258	0.0639421	0.0540906	0.0576337	0.0586842	0.178548	0.181834	0.201207	0.189424	0.24454	0.212661	0.0482556	0.0994194					0.0606968	0.148743	0.122435
BLR	0.113926	0.18963	0.112305	0.107993	0.0777769	0.189356	0.0742514		0.218211	0.140583		0.106725	0.115188	0.0788801	0.229335	0.246929	0.291488	0.253655	0.37977	0.307837	0.076421	0.154587					0.076846	0.262895	0.205426
BRN	0.0872184	0.17335	0.0804913	0.0830817	0.0517238	0.126735	0.0523934		0.159911	0.0828292		0.0518825	0.054524	0.0583923	0.180727	0.181927	0.198	0.189761	0.236761	0.208244	0.0477758	0.0964					0.0605817	0.144375	0.118052
FIN	0.133502	0.277866	0.109892	0.126366	0.081136	0.179369	0.083209	0.082768	0.242931	0.116065	0.0749456	0.0720794	0.0746658	0.0930771	0.27797	0.275516	0.294295	0.288127	0.345562	0.308327	0.0738662	0.141957					0.0781711	0.197912	0.158647
BGD	0.0926775	0.173306	0.0839385	0.0892015	0.0544695	0.135965	0.0546404		0.171295	0.089977		0.0584057	0.0625655	0.0607433	0.18857	0.192981	0.215073	0.20091	0.26331	0.227719	0.050664	0.107111					0.0617879	0.158238	0.129897
PRT	0.0777191	0.153023	0.099933	0.0717988	0.0744176	0.142998	0.0774255		0.145703	0.101712		0.0691621	0.0719772	0.0826407	0.164524	0.169693	0.188941	0.17521	0.233319	0.196362	0.066464	0.0948126					0.0818528	0.189612	0.151989
GHA	0.104279	0.189498	0.0806347	0.101026	0.0580829	0.14211	0.0576544		0.19319	0.0942786		0.0633113	0.0686639	0.0643554	0.209775	0.215964	0.243044	0.224803	0.300245	0.258337	0.0545555	0.122266					0.05325	0.163763	0.132763
UGA	0.0929179	0.170731	0.056539	0.0900572	0.0533723	0.112566	0.0536861		0.171643	0.0740566		0.0508519	0.0553457	0.0599639	0.187603	0.192333	0.215182	0.200393	0.264044	0.228643	0.0493813	0.107347					0.0299371	0.124841	0.0985929
ALB	0.0949685	0.183768	0.0857419	0.0906258	0.055707	0.138259	0.0557343		0.175091	0.0919374		0.0597166	0.0632598	0.0619049	0.195357	0.198469	0.218785	0.206665	0.265324	0.230552	0.0521317	0.108105					0.0627723	0.161545	0.131042
SWZ	0.0766856	0.13737	0.0627475	0.0742107	0.0500509	0.108365	0.0508647		0.142614	0.0725843		0.0490887	0.0532485	0.0560023	0.155053	0.160706	0.181821	0.166979	0.225703	0.193113	0.0457332	0.0913684					0.0426214	0.127488	0.1035
KAZ	0.0681453	0.128504	0.0740756	0.0650256	0.0479794	0.111232	0.0491706		0.126399	0.0746142		0.0479702	0.0509012	0.0537857	0.140674	0.144465	0.160913	0.150045	0.197079	0.169582	0.043582	0.0796969					0.0591125	0.134279	0.111005
SLV	0.0949873	0.176908	0.0898788	0.0904279	0.0594436	0.145387	0.0588561		0.17702	0.100111		0.0684103	0.0729042	0.0644494	0.194531	0.200873	0.225804	0.208342	0.279819	0.238029	0.056235	0.113887					0.0653827	0.179971	0.144458
KOR	0.0827599	0.167184	0.0859996	0.075164	0.063503	0.136131	0.0624183	0.0877803	0.155833	0.101259	0.0807413	0.0745354	0.077148	0.066234	0.177593	0.183271	0.203597	0.188743	0.251869	0.210083	0.0611103	0.102582					0.0610908	0.188226	0.142502
SUR	0.0958812	0.175249	0.0694074	0.0924216	0.0567015	0.127263	0.0565021		0.177992	0.085783		0.0593764	0.0642092	0.0625776	0.194059	0.200091	0.225189	0.208025	0.278506	0.238759	0.0530905	0.113286					0.0425611	0.149084	0.118382
LAO	0.0964021	0.17009	0.0908187	0.09269	0.060341	0.149182	0.0595489		0.180692	0.103077		0.0714604	0.0771628	0.0651078	0.194385	0.203363	0.232753	0.210669	0.293112	0.246761	0.0570969	0.119141					0.0655669	0.186166	0.150635
GTM	0.091892	0.179903	0.0854327	0.0872098	0.0556607	0.136101	0.0557134		0.169545	0.0913239		0.0597097	0.0629137	0.0615895	0.190221	0.193109	0.21235	0.200933	0.257169	0.223148	0.0521348	0.104768					0.0630981	0.161452	0.130197
COG	0.101923	0.185342	0.0784742	0.0976479	0.0615304	0.141192	0.060587		0.190206	0.0976327		0.0693257	0.0746783	0.0665426	0.206769	0.214461	0.242855	0.222456	0.302834	0.256897	0.0584613	0.123303					0.0491519	0.172809	0.135965
THA	0.0841747	0.164542	0.0583218	0.0800324	0.0524755	0.107345	0.0530123		0.155167	0.0721098		0.0492965	0.0522275	0.058585	0.174301	0.176868	0.19432	0.184099	0.234908	0.204329	0.0486003	0.0955317	0.120673	0.140165	0.184087	0.233434	0.0345141	0.123734	0.09599
NLD	0.0684186	0.137588	0.102937	0.0600765	0.0813106	0.144884	0.0833063	0.110165	0.131617	0.111987	0.0965024	0.0832277	0.0857022	0.0865771	0.150428	0.158643	0.17951	0.161876	0.227692	0.18321	0.0743349	0.0924353					0.0833018	0.216938	0.166556
HTI	0.0922162	0.155441	0.0918686	0.0886649	0.0617553	0.150141	0.060708		0.174542	0.106209		0.075856	0.0822656	0.0656051	0.184855	0.1965	0.229007	0.202857	0.29361	0.243049	0.0586291	0.119144					0.0667772	0.19508	0.157317
URY	0.0592911	0.10971	0.0575918	0.0555919	0.0495068	0.0941501	0.0504628		0.111723	0.0676443		0.0487249	0.0516559	0.0539587	0.12399	0.129749	0.147068	0.13383	0.184139	0.153969	0.0453433	0.0742344					0.0405408	0.12403	0.0968786
PHL	0.0863018	0.167526	0.0699095	0.0831627	0.0493701	0.11655	0.0503649		0.157937	0.0744078		0.0461201	0.0491437	0.056607	0.176765	0.178173	0.194762	0.186148	0.233271	0.206036	0.0450703	0.0948654					0.0496043	0.126654	0.104261
LKA	0.0946954	0.160975	0.0927681	0.0910275	0.0623052	0.152306	0.0611784		0.178947	0.107436		0.0765397	0.0829493	0.066245	0.189987	0.201397	0.234007	0.208029	0.299172	0.248294	0.0592409	0.121474					0.0670054	0.196755	0.158531
CIV	0.0903146	0.173733	0.0648121	0.0872336	0.0504471	0.115083	0.0512641		0.165394	0.0734549		0.0465604	0.0499202	0.0577438	0.184234	0.186037	0.204022	0.194368	0.245139	0.216143	0.0462286	0.0997474					0.0420819	0.123425	0.100305
KWT	0.0516135	0.09378	0.0682286	0.0490171	0.0443968	0.0965744	0.0461223		0.0968414	0.0663463		0.0432493	0.0459219	0.0496018	0.107201	0.112043	0.126938	0.115817	0.158241	0.133572	0.0396312	0.0634936	0.127359	0.143392	0.139049	0.179027	0.0577417	0.122883	0.102309
AUT	0.0756465	0.14786	0.0984672	0.0721289	0.0651631	0.135233	0.06956		0.139173	0.0884748		0.052732	0.0553184	0.0759343	0.156718	0.158763	0.174008	0.165381	0.209529	0.183141	0.0560417	0.0850123					0.0860124	0.160015	0.13648
MYS	0.100711	0.202277	0.0592943	0.0958309	0.0556408	0.117029	0.0557289		0.184306	0.0767862		0.0517171	0.0545323	0.0625095	0.208617	0.2092	0.226765	0.218371	0.270153	0.23836	0.0521273	0.110332					0.0303936	0.127425	0.0972927
ZMB	0.0933634	0.165668	0.0729921	0.0900766	0.0575812	0.130524	0.0572175		0.174375	0.0894099		0.0628531	0.0682056	0.0628897	0.188083	0.19593	0.223237	0.203271	0.279563	0.236961	0.0540316	0.11358					0.046759	0.158105	0.126098
LBR	0.0993265	0.178826	0.0745205	0.0959154	0.0583559	0.134878	0.0578824		0.184805	0.091296		0.0633983	0.0687509	0.0640429	0.200169	0.207272	0.234633	0.215358	0.291855	0.249086	0.0548837	0.118735					0.0468788	0.159748	0.127499
MEX	0.0796126	0.153207	0.057128	0.0761601	0.0500879	0.103117	0.0509699	0.0942488	0.146718	0.0683903	0.0775884	0.0458545	0.0488781	0.0564306	0.163954	0.166709	0.183802	0.173615	0.22263	0.193851	0.0459079	0.0903813	0.11593	0.134565	0.17084	0.217521	0.035442	0.117212	0.0925805
MLI	0.0681904	0.110393	0.0687622	0.0651526	0.0552765	0.11459	0.055233		0.130638	0.083922		0.0627304	0.068083	0.0587014	0.137515	0.148817	0.176237	0.15287	0.229589	0.186638	0.0515261	0.0926067					0.0483137	0.156611	0.124098
BOL	0.105247	0.191488	0.0836237	0.0994167	0.0682683	0.151409	0.066305		0.198216	0.109676		0.082057	0.0877595	0.0715907	0.215507	0.225564	0.257445	0.232983	0.324789	0.270795	0.0660217	0.132339					0.0505606	0.198635	0.15202
SLE	0.0977966	0.175294	0.0734746	0.0945784	0.0575931	0.132882	0.0572316		0.181959	0.0897155		0.062127	0.0674796	0.0633499	0.196803	0.203914	0.231061	0.211892	0.287583	0.245472	0.0540275	0.116951					0.0464064	0.156872	0.125578
FJI	0.0809207	0.151396	0.086445	0.0760557	0.0576466	0.134263	0.0573546		0.151893	0.0950915		0.0663521	0.0701855	0.0618122	0.167858	0.174556	0.197085	0.180389	0.245986	0.206602	0.0543424	0.0998686					0.0653418	0.174723	0.139106
VNM	0.0829487	0.158448	0.0736637	0.0790269	0.0529748	0.120854	0.0534092		0.153566	0.0815265		0.054348	0.0577078	0.0587728	0.170947	0.174792	0.193949	0.181692	0.236867	0.204276	0.0491145	0.0962323					0.0525896	0.144088	0.115753
NIC	0.0896432	0.167089	0.0621791	0.0857385	0.0557994	0.116813	0.0557698		0.166509	0.0799291		0.0565358	0.0606956	0.0613704	0.183232	0.188577	0.211255	0.195874	0.260476	0.223088	0.0521791	0.1059					0.0358876	0.13908	0.108134
CAN	0.0695847	0.139533	0.100972	0.0618643	0.062758	0.142517	0.0617809	0.10651	0.132971	0.108149	0.092784	0.0788727	0.0813472	0.0643793	0.151724	0.159065	0.179137	0.162775	0.225604	0.18356	0.0603378	0.0915895					0.0819793	0.207813	0.160965
NGA	0.0864098	0.154324	0.0698083	0.0831747	0.0553758	0.122709	0.0553651		0.161396	0.084193		0.0589653	0.0637981	0.0606788	0.174816	0.182001	0.206978	0.188764	0.258793	0.219416	0.0516295	0.105019					0.0457733	0.149363	0.119196
BHS	0.0750476	0.138455	0.0850145	0.0702865	0.056948	0.130075	0.0567547		0.14164	0.0933592		0.0659444	0.0697778	0.0607218	0.155984	0.163437	0.185935	0.168526	0.234008	0.194717	0.0535761	0.0948436					0.0652742	0.173385	0.137905
TJK	0.0843002	0.151842	0.08094	0.0814898	0.0527059	0.129253	0.0531111		0.156707	0.0863323		0.0567053	0.0611991	0.0586164	0.170349	0.176301	0.199234	0.183218	0.247179	0.211525	0.0486622	0.100268					0.0609808	0.153751	0.127136
BLZ	0.100062	0.186058	0.0944107	0.0948869	0.0629512	0.153991	0.061826		0.187033	0.107574		0.0750092	0.079842	0.067404	0.205221	0.212571	0.239735	0.220191	0.298442	0.252353	0.0601376	0.121573					0.067602	0.194527	0.154626
PNG	0.0922493	0.172092	0.0827046	0.0890589	0.053444	0.134142	0.053767		0.170252	0.0879561		0.0564214	0.0605812	0.0599776	0.187245	0.191396	0.21314	0.199414	0.260504	0.225982	0.0495066	0.105947					0.0610201	0.1539	0.127111
ESP	0.0766193	0.150896	0.115369	0.069525	0.0788316	0.158383	0.0811747	0.0940547	0.145253	0.115998	0.0851114	0.0806482	0.0835792	0.085626	0.164123	0.171145	0.192403	0.175835	0.24095	0.198692	0.0714424	0.0979228	0.202047	0.227785	0.165332	0.232637	0.0977365	0.22116	0.17648
JPN	0.119295	0.245997	0.143912	0.112328	0.0800051	0.201693	0.0822282	0.128352	0.218365	0.132993	0.104402	0.0804232	0.0830958	0.090825	0.249272	0.249006	0.268207	0.25972	0.318332	0.280448	0.0726332	0.130504					0.122017	0.238718	0.19898
DOM	0.08665	0.165596	0.0843766	0.0822919	0.0552878	0.133216	0.05537		0.160741	0.0905922		0.0602827	0.0638259	0.0607619	0.178808	0.183172	0.203647	0.190231	0.249489	0.214229	0.0516907	0.101454					0.063123	0.162131	0.130919
DZA	0.07251	0.134951	0.0623483	0.0692831	0.0499453	0.104905	0.050821		0.1348	0.0713448		0.0485653	0.0519251	0.0555759	0.149	0.15361	0.172077	0.15945	0.212031	0.181558	0.0457318	0.0858373	0.122417	0.142343	0.16148	0.211129	0.0431421	0.126402	0.101138
TUR	0.107642	0.212042	0.100334	0.100487	0.0671926	0.163233	0.0655047		0.200471	0.115352		0.0809778	0.0848112	0.0712568	0.224881	0.2302	0.255132	0.238483	0.313115	0.266355	0.0650261	0.127945	0.192256	0.221438	0.230908	0.306111	0.0706336	0.208516	0.162203
IRN	0.0879719	0.160756	0.0852713	0.0842504	0.0561081	0.13649	0.0560105	0.111402	0.164015	0.09318	0.0947878	0.0629074	0.0674012	0.061386	0.17917	0.185606	0.209612	0.192553	0.26055	0.221601	0.0524928	0.105837					0.0633443	0.16749	0.136098
COL	0.0776776	0.149396	0.061814	0.0737939	0.051489	0.107067	0.0521608		0.143834	0.072759		0.0497096	0.0527331	0.0572199	0.160811	0.16434	0.182002	0.170762	0.221919	0.191391	0.0474991	0.0900615					0.0405617	0.127541	0.100373
FLK	0.14751	0.299418	0.0982396	0.142316	0.0616985	0.175328	0.0608814		0.266743	0.106939		0.0628542	0.0664032	0.0714777	0.301442	0.297737	0.318256	0.312622	0.372016	0.336666	0.0586951	0.152864					0.0631726	0.172402	0.141092
SWE	0.070901	0.138666	0.0818056	0.0670296	0.0657833	0.119109	0.0700907	0.0492058	0.131158	0.0801207	0.0478324	0.0509207	0.0533952	0.0758975	0.14799	0.150788	0.166043	0.156653	0.201371	0.174112	0.0567756	0.0816034					0.0669244	0.144838	0.119433
GMB	0.0741718	0.134196	0.0606955	0.0718208	0.0484517	0.104102	0.0495214		0.137569	0.0690028		0.045893	0.0497263	0.0546504	0.150259	0.155119	0.174629	0.161327	0.215576	0.185456	0.0439768	0.0872227					0.0416821	0.120511	0.0983299
AUS	0.0680849	0.136979	0.0942216	0.0596188	0.0652861	0.137531	0.0639316		0.131172	0.107814		0.0821039	0.0845784	0.0660064	0.149968	0.158373	0.179399	0.161496	0.227914	0.182941	0.063201	0.0925224	0.183577	0.210245	0.205612	0.276599	0.0728142	0.208547	0.157452
HND	0.0925939	0.176829	0.0880847	0.0878186	0.0579965	0.140968	0.057663		0.171957	0.0965158		0.0650798	0.0689131	0.0632483	0.190968	0.195833	0.218053	0.203296	0.267734	0.229296	0.0546918	0.109006					0.0646631	0.172862	0.138618
QAT	0.0551701	0.101923	0.0683011	0.0526557	0.0441242	0.0979451	0.0458972		0.102792	0.0659852		0.0420243	0.0446368	0.0497778	0.114229	0.118262	0.132721	0.122599	0.16367	0.139889	0.0393167	0.0657962					0.0572577	0.120528	0.100916
CRI	0.0953791	0.185354	0.0886902	0.090328	0.0582134	0.14238	0.0578682		0.176552	0.0968359		0.0646738	0.0682169	0.0637114	0.197345	0.201196	0.222388	0.209084	0.271036	0.233576	0.0549628	0.110468					0.0647007	0.172332	0.13793
BIH	0.119565	0.231139	0.0961752	0.114495	0.0626342	0.163328	0.0615942		0.220009	0.10788		0.0706524	0.0751462	0.0692008	0.244347	0.247619	0.272773	0.25816	0.330477	0.288002	0.059744	0.135135					0.0658745	0.186731	0.150224
MDA	0.0804095	0.145021	0.0873043	0.0758679	0.058552	0.136305	0.0580841		0.151825	0.097449		0.0690877	0.0735816	0.062336	0.165456	0.173941	0.199096	0.179441	0.251758	0.209282	0.0552849	0.102105					0.0658745	0.180316	0.143809
CHE	0.102652	0.21552	0.112556	0.0911332	0.0779518	0.175501	0.0747445	0.0636593	0.19411	0.134639	0.0727668	0.101659	0.104134	0.0784472	0.223883	0.230606	0.254854	0.236853	0.315382	0.260523	0.0773797	0.129102					0.0799079	0.253641	0.188208
RWA	0.0903667	0.167311	0.065225	0.0878601	0.0509406	0.116971	0.0516343		0.166275	0.0751857		0.0485591	0.0527189	0.0580231	0.182365	0.186024	0.206947	0.194137	0.252143	0.220138	0.0466846	0.10247					0.0422013	0.127394	0.104255
FRA	0.074114	0.148121	0.123739	0.0664618	0.079739	0.164503	0.081963	0.0594384	0.141012	0.121395	0.0631675	0.0841734	0.086815	0.0860357	0.160422	0.167538	0.188211	0.171789	0.236085	0.193449	0.0725148	0.0959422	0.222209	0.247818	0.197352	0.264926	0.107647	0.233619	0.18682
PAK	0.0966983	0.173982	0.0922139	0.0923603	0.0614552	0.150596	0.0605183	0.0865476	0.181251	0.104937	0.0834949	0.0732185	0.0785711	0.0659572	0.196464	0.205003	0.233564	0.212257	0.293262	0.246813	0.058397	0.11928					0.0665322	0.190154	0.152568
IRL	0.073698	0.147011	0.112503	0.066252	0.0789927	0.154303	0.0813274		0.140075	0.114327		0.0804776	0.0831191	0.0854679	0.159253	0.166197	0.186621	0.170498	0.233855	0.191985	0.071673	0.0950158					0.0948781	0.218887	0.1732
LUX	0.0788356	0.160834	0.110766	0.0700088	0.0836019	0.157427	0.0852661		0.150121	0.119309		0.0869561	0.0894305	0.089252	0.171984	0.179201	0.200496	0.183598	0.251025	0.205228	0.0768834	0.10221					0.0890626	0.228465	0.176175
LVA	0.0769126	0.150346	0.0959808	0.0719311	0.0710812	0.137376	0.0745846		0.143314	0.0951751		0.0626073	0.0654224	0.0802094	0.161366	0.165595	0.183686	0.171484	0.225247	0.191838	0.0626963	0.0914692					0.0793069	0.175328	0.142852
BWA	0.0650214	0.122111	0.0569794	0.0623411	0.0458995	0.0939075	0.0474046		0.120335	0.0624759		0.0410185	0.0438336	0.0520134	0.133873	0.137267	0.152691	0.142724	0.186461	0.161236	0.0412585	0.0752956					0.0407644	0.109708	0.0891011
LBN	0.134837	0.234584	0.112714	0.129687	0.0762224	0.19797	0.0729469		0.253492	0.138893		0.100071	0.108534	0.0799168	0.269706	0.283313	0.326544	0.293278	0.414402	0.346544	0.0745815	0.169169					0.0739227	0.250072	0.198512
MNG	0.0707244	0.125536	0.0811068	0.0670178	0.0540287	0.123692	0.0542455		0.133627	0.087721		0.0612345	0.0653943	0.0581955	0.14521	0.153139	0.175889	0.157971	0.222841	0.185233	0.0502526	0.0901058					0.0632344	0.162682	0.131417
NAM	0.0712364	0.129616	0.0651323	0.0669968	0.0549037	0.11027	0.0550111		0.134505	0.0798801		0.058729	0.0625623	0.058894	0.147529	0.154958	0.176871	0.159798	0.223079	0.185586	0.0512807	0.0902801					0.0437413	0.146367	0.113493
IND	0.0857789	0.165331	0.0620582	0.0830464	0.0481905	0.109083	0.0493547	0.0736393	0.156756	0.0686961	0.063055	0.042547	0.0456585	0.0557152	0.174939	0.176242	0.192735	0.184297	0.230641	0.20436	0.0437278	0.0937536	0.117328	0.134727	0.153719	0.196652	0.0411099	0.114673	0.0941422
TZA	0.0894387	0.168169	0.0658059	0.0864747	0.0514684	0.116858	0.052103		0.164585	0.0758402		0.0493611	0.0531944	0.0583304	0.18169	0.184977	0.204994	0.192942	0.249095	0.21742	0.047326	0.101268					0.0427976	0.129213	0.104777
MAR	0.0604934	0.11038	0.061993	0.0567148	0.0507072	0.0995365	0.0514686		0.114361	0.0719095		0.0519256	0.0551296	0.0549018	0.126168	0.132695	0.151339	0.136722	0.190713	0.158524	0.0466604	0.0769062	0.120756	0.141421	0.146956	0.199073	0.0447702	0.132839	0.104242
NER	0.0683842	0.108247	0.0691676	0.0652783	0.0566224	0.116325	0.0563582		0.131662	0.0862784		0.0655811	0.0712835	0.059634	0.137559	0.15001	0.179117	0.153825	0.235202	0.189721	0.0530048	0.0948537					0.0479297	0.161946	0.127677
PRY	0.0719888	0.136852	0.0634313	0.0675407	0.0534189	0.107191	0.053793		0.134763	0.0762333		0.0546552	0.0577668	0.057991	0.150296	0.155583	0.174446	0.160886	0.216139	0.182586	0.0496916	0.0875791					0.0425079	0.13779	0.106713
OMN	0.0656828	0.124212	0.0876452	0.0593484	0.0599603	0.128965	0.05935		0.126036	0.098012		0.0727653	0.0759693	0.0619457	0.140729	0.149372	0.171114	0.152791	0.218426	0.176732	0.057098	0.0884174					0.0686027	0.187756	0.145374
SVN	0.100994	0.205308	0.109783	0.0936321	0.0807929	0.165211	0.0828735	0.0783393	0.187428	0.115589	0.0744916	0.0780118	0.0808269	0.0895016	0.213278	0.216621	0.237272	0.224556	0.287943	0.246677	0.0735777	0.117679					0.084944	0.210608	0.166737
VEN	0.136873	0.240258	0.100856	0.130465	0.080747	0.191304	0.0768003		0.258343	0.138444		0.104995	0.113458	0.0833099	0.27584	0.290565	0.33533	0.300161	0.427048	0.354485	0.0796873	0.174417					0.0568085	0.249708	0.191325
MKD	0.101116	0.197423	0.0877024	0.0965502	0.0568378	0.143265	0.0567025		0.185944	0.0945275		0.0609449	0.0644881	0.0633276	0.207973	0.210425	0.230914	0.21934	0.278655	0.243348	0.0533855	0.113691					0.0631558	0.164684	0.133405
AZE	0.0959944	0.188602	0.0850136	0.0915887	0.0549249	0.13712	0.0550908		0.176336	0.090155		0.0575402	0.0607442	0.0614896	0.197938	0.199905	0.218733	0.208427	0.263109	0.230357	0.051287	0.107276					0.0621873	0.157061	0.127647
ZWE	0.0870061	0.152038	0.0730192	0.083444	0.0581845	0.128108	0.0577254		0.163689	0.0901775		0.0651381	0.0704906	0.0626666	0.175871	0.184972	0.212729	0.191309	0.269294	0.22531	0.0547385	0.109254					0.04775	0.162572	0.128562
ISR	0.0660446	0.126339	0.0838539	0.0604289	0.0566078	0.123562	0.0565137		0.125421	0.0912538		0.0656299	0.0685609	0.0596468	0.140611	0.147532	0.167126	0.151546	0.210405	0.173255	0.0533424	0.0851693					0.0660381	0.172432	0.135159
CZE	0.0802158	0.15869	0.0767901	0.0754118	0.0701042	0.121613	0.0737669	0.0788549	0.148527	0.0833347	0.0691627	0.0558133	0.0584549	0.0798739	0.167876	0.17087	0.187892	0.177411	0.22798	0.19655	0.0616012	0.0926795					0.056508	0.148993	0.118445
CYP	0.101572	0.205505	0.10543	0.0953057	0.0769851	0.159586	0.0796325		0.187263	0.108224		0.0702773	0.0730924	0.0868794	0.212619	0.214639	0.233915	0.223215	0.281433	0.244387	0.0692716	0.115					0.0819161	0.193871	0.156121
SEN	0.0710441	0.12784	0.0488294	0.0681982	0.0500085	0.0934851	0.0508438		0.132693	0.0646086		0.0466125	0.0504458	0.0554277	0.144844	0.150728	0.170908	0.156257	0.213023	0.180848	0.0457487	0.0861261					0.0273729	0.113201	0.0880404
COD	0.0934426	0.172131	0.0837679	0.0903223	0.0543119	0.136579	0.0544864		0.172824	0.0900369		0.0583799	0.0628738	0.0606789	0.189077	0.194022	0.217186	0.20202	0.266854	0.230487	0.0504412	0.108514					0.0614918	0.15809	0.130441
GEO	0.0841266	0.159383	0.0746982	0.0818902	0.0471349	0.118936	0.048439		0.15381	0.0744055		0.0441241	0.047484	0.054781	0.17051	0.172277	0.189314	0.180202	0.227408	0.201323	0.0425094	0.0923436					0.0570069	0.126965	0.108065
IDN	0.0845186	0.164962	0.0751731	0.0800083	0.0540743	0.122935	0.0543677		0.156313	0.083439		0.055856	0.0588795	0.0597374	0.175476	0.178698	0.197026	0.185726	0.239386	0.206815	0.0503941	0.0973651					0.0534321	0.14764	0.11751
ROU	0.0966304	0.192776	0.106779	0.0900734	0.0786518	0.159978	0.0810282	0.0748324	0.179557	0.111436	0.0718255	0.0748363	0.0779479	0.0875225	0.202877	0.206888	0.227964	0.214453	0.278024	0.23768	0.071137	0.113462					0.0835271	0.203241	0.162316
GUY	0.0894904	0.175754	0.0628648	0.0857693	0.0513017	0.112884	0.0520178		0.1639	0.0730583		0.0472173	0.0501482	0.0583003	0.184197	0.185499	0.202337	0.193668	0.242167	0.213474	0.0472526	0.098601					0.0394813	0.123088	0.0980786
MOZ	0.0942312	0.168085	0.070961	0.0904109	0.0595003	0.130259	0.0588519		0.17644	0.0908426		0.0655996	0.0709522	0.0643293	0.190693	0.199014	0.226971	0.206199	0.284935	0.240338	0.0561971	0.115809					0.0430471	0.161319	0.126419
NPL	0.0888435	0.169621	0.0815358	0.0852774	0.0526367	0.130245	0.0531151		0.163689	0.0855783		0.0545949	0.058138	0.0591189	0.18187	0.185014	0.204465	0.192777	0.248187	0.216068	0.0486857	0.100947					0.0608687	0.14996	0.123305
PAN	0.0901227	0.17663	0.0844204	0.0855372	0.0549323	0.133906	0.0550976		0.166225	0.0897058		0.0584294	0.0615409	0.0609047	0.186654	0.189406	0.208134	0.197099	0.251848	0.218706	0.0513304	0.102567					0.0627025	0.158581	0.1281
ISL	0.15155	0.318808	0.112709	0.142227	0.0736585	0.194892	0.0711213		0.276572	0.1296		0.0850328	0.0877054	0.0803899	0.317433	0.315041	0.336635	0.328922	0.39653	0.351303	0.0723089	0.163225					0.0724917	0.221247	0.170858
CHL	0.0582797	0.109506	0.058733	0.0541884	0.050142	0.0947071	0.0510163		0.110012	0.0688569		0.0499928	0.0527058	0.0543226	0.122901	0.128569	0.145399	0.132453	0.18196	0.151656	0.0460931	0.0733674	0.116676	0.135771	0.148845	0.197534	0.0417444	0.127108	0.0985809
SAU	0.0663776	0.130691	0.0890361	0.0592566	0.0609974	0.130179	0.0602688		0.127088	0.0995286		0.0740054	0.0766469	0.0627976	0.144131	0.151794	0.171937	0.155268	0.217566	0.176561	0.0583393	0.088192	0.168271	0.193008	0.176193	0.241259	0.0695417	0.190766	0.146332
YEM	0.115029	0.207244	0.103844	0.109493	0.0700068	0.175032	0.0677526		0.216045	0.123703		0.0885466	0.0949561	0.0737399	0.233585	0.244085	0.27868	0.252519	0.351122	0.294153	0.0678651	0.143196					0.0713747	0.224374	0.177318
BEL	0.0736462	0.147713	0.108242	0.065362	0.0819273	0.152308	0.0838255	0.097799	0.140875	0.115884	0.0890118	0.0846891	0.0873306	0.0875288	0.160534	0.168433	0.189902	0.172296	0.239582	0.194505	0.07499	0.0973794					0.0881205	0.223068	0.172728
USA	0.0628862	0.122084	0.0854665	0.0580479	0.0472358	0.120394	0.0468039	0.0575235	0.118343	0.0859113	0.0554763	0.0584013	0.0608758	0.0499307	0.133618	0.138697	0.155291	0.142978	0.192732	0.161362	0.0449594	0.0779279	0.15288	0.172271	0.141163	0.191232	0.0711867	0.161167	0.1298
UKR	0.100415	0.174879	0.108279	0.0953061	0.0676793	0.171104	0.0657582	0.075424	0.190354	0.122945	0.0822428	0.0882574	0.0946669	0.0706117	0.203762	0.215949	0.250258	0.222619	0.320147	0.264056	0.0652922	0.13021					0.0810127	0.228233	0.182449
SLB	0.0950753	0.173327	0.0859162	0.0917809	0.0560769	0.140653	0.0559697		0.176425	0.0938921		0.0620659	0.0668987	0.0620556	0.19218	0.198146	0.223051	0.206055	0.275813	0.236656	0.0523877	0.112164					0.0626278	0.166061	0.136214
GBR	0.0711269	0.142352	0.12086	0.0626922	0.0658716	0.162198	0.0644224	0.10066	0.136685	0.123204	0.0912378	0.0886196	0.0912612	0.0667135	0.155763	0.164206	0.185905	0.16765	0.235801	0.190018	0.0638296	0.095784					0.103344	0.239448	0.188085
SYR	0.0813248	0.116095	0.0972667	0.0777165	0.0677753	0.156572	0.0657082		0.159441	0.119062		0.0921797	0.100643	0.0685154	0.160539	0.180346	0.222558	0.183841	0.301131	0.236402	0.0652456	0.121679					0.0716774	0.228824	0.181802
MNE	0.103688	0.201855	0.0932121	0.0981192	0.0614085	0.152137	0.0605774		0.191959	0.103856		0.0700462	0.0738796	0.0667813	0.214383	0.218498	0.24152	0.227059	0.294512	0.253613	0.0585043	0.120211					0.0664285	0.184494	0.14668
BEN	0.0896867	0.168795	0.0661983	0.0866366	0.0517843	0.11748	0.0523722		0.165105	0.0764702		0.0499528	0.0537861	0.0585781	0.182326	0.185674	0.205794	0.193628	0.250169	0.218178	0.0476821	0.101715					0.0430247	0.130516	0.105621
LBY	0.0549901	0.0997025	0.0572668	0.0519126	0.0470831	0.0906148	0.0483958		0.103635	0.0642495		0.0452374	0.0481684	0.0518139	0.114393	0.120089	0.136706	0.123906	0.171574	0.143559	0.042621	0.0689889					0.0424716	0.118033	0.0940069
BFA	0.0828624	0.146475	0.0688078	0.0797237	0.0548361	0.119997	0.0549025		0.155168	0.0829177		0.0584829	0.0633157	0.0599373	0.167589	0.175191	0.200108	0.181523	0.251324	0.212132	0.0510336	0.101888					0.0456403	0.148042	0.118144
PSE	0.0927011	0.143109	0.108167	0.0868902	0.076142	0.175607	0.0728406		0.181426	0.136052		0.107035	0.115499	0.0755657	0.186843	0.20745	0.252214	0.211357	0.338245	0.265682	0.074657	0.137156					0.0772984	0.261932	0.203549
GRC	0.0927472	0.183325	0.101762	0.086469	0.0777428	0.153622	0.0802451		0.172716	0.107597		0.0730121	0.0762161	0.0864784	0.194561	0.199124	0.22034	0.206245	0.269903	0.229823	0.0701131	0.110037					0.0789209	0.196654	0.156612
ARG	0.0994274	0.172285	0.0803214	0.0947671	0.0660526	0.145876	0.0643726	0.0968675	0.188173	0.105662	0.0949657	0.0794551	0.0858646	0.0693658	0.201055	0.212882	0.24665	0.219648	0.31514	0.260711	0.0634576	0.12813					0.0490955	0.192259	0.148886
IRQ	0.0798833	0.141169	0.0877158	0.0755039	0.0590154	0.137212	0.0584575		0.15134	0.0986363		0.0705284	0.0753612	0.0625763	0.163703	0.173148	0.199662	0.178439	0.254241	0.21015	0.0557689	0.103051					0.0661678	0.183249	0.146247
MDG	0.0745977	0.132991	0.0631616	0.0719326	0.0505987	0.108116	0.0513291		0.13921	0.073516		0.0505402	0.0547001	0.0561752	0.151207	0.157385	0.178772	0.163277	0.223023	0.189598	0.0463605	0.0902339					0.0432205	0.130476	0.105277
CMR	0.0949662	0.173062	0.0714088	0.0916987	0.0559762	0.12816	0.0558839		0.176207	0.0859056		0.0587225	0.0635552	0.0619736	0.191918	0.19787	0.222743	0.205778	0.275417	0.236357	0.0522744	0.111999					0.0455451	0.149496	0.11979
GAB	0.103069	0.187893	0.0860764	0.0987491	0.061755	0.148313	0.0607792		0.192234	0.102051		0.071169	0.0765216	0.0668176	0.209128	0.216702	0.245133	0.224829	0.305348	0.259296	0.0587106	0.124356					0.0577773	0.181568	0.144558
SDN	0.0784101	0.109642	0.0820492	0.074885	0.0673177	0.142043	0.0653161		0.154319	0.110203		0.088595	0.0970586	0.0678962	0.154594	0.174739	0.216896	0.177881	0.294967	0.230405	0.06474	0.119095					0.0545443	0.211519	0.164741
EGY	0.0730662	0.126495	0.0651568	0.0684509	0.0594541	0.115215	0.0588248		0.139818	0.0869576		0.0676501	0.0724829	0.0621903	0.150509	0.161233	0.188155	0.165477	0.242816	0.197471	0.0562917	0.0982419	0.134966	0.164532	0.185059	0.259146	0.0406277	0.162021	0.123201
AGO	0.0917888	0.16856	0.0692894	0.0886231	0.0543771	0.12353	0.0545403		0.170016	0.0822742		0.0556302	0.060124	0.0605562	0.185857	0.191099	0.214348	0.198849	0.264001	0.227374	0.0505213	0.107314					0.0446649	0.142694	0.11467
CUB	0.108243	0.192321	0.102307	0.1028	0.0692994	0.170349	0.0671444		0.20423	0.121896		0.0882754	0.094685	0.0725503	0.219914	0.231318	0.265913	0.238878	0.33748	0.280512	0.0670924	0.137473					0.0713747	0.223262	0.176206

## Sheet: LCOX_15deg50
	PEM	DAC	AD	AE	ATR_CCS	B_PYR_kerosene	CLR	CuCl	HB	HTL	HTSE	HVO_diesel	HVO_kerosene	M_PYR	PTM	RWGS_FT_diesel	RWGS_FT_kerosene	RWGS_MeOH_methanol	RWGS_MeOH_DME	RWGS_MeOH_kerosene	SMR_CCS	SOEC	SR_FT_diesel	SR_FT_kerosene	ST_FT_diesel	ST_FT_kerosene	TG_CCS	TG_FT_diesel	TG_FT_kerosene
ECU	0.090162	0.153805	0.0736105	0.0837753	0.0588597	0.131313	0.0576069		0.172055	0.0772443		0.0700502	0.0757468	0.0513612	0.181541	0.182809	0.208118	0.19146	0.260047	0.224836	0.0550066	0.102008					0.0408295	0.13743	0.11206
DEU	0.0625728	0.109755	0.103512	0.0539019	0.0742334	0.139543	0.0765602		0.122023	0.0892117		0.0767511	0.0792239	0.0665394	0.132466	0.132995	0.14905	0.138198	0.187206	0.1564	0.0658338	0.0739544	0.180559	0.197842	0.14786	0.189666	0.0823551	0.172748	0.140925
EST	0.0624322	0.114293	0.087274	0.0572513	0.0635173	0.119395	0.0677044		0.117755	0.071397		0.0526397	0.0553104	0.0616335	0.129079	0.128378	0.1418	0.134523	0.172294	0.15137	0.0539102	0.0679398					0.0721922	0.131381	0.113734
MMR	0.0887571	0.153619	0.0840569	0.0840649	0.0534142	0.136317	0.0531083		0.167534	0.0781864		0.0620773	0.0677739	0.0487366	0.17735	0.178041	0.20175	0.186996	0.249361	0.21923	0.0489613	0.0977157					0.0580387	0.137703	0.119226
MWI	0.0687617	0.111442	0.0631248	0.0650283	0.0496929	0.107084	0.0499851		0.131753	0.0624916		0.0542277	0.0595749	0.0449174	0.137077	0.139581	0.161744	0.146157	0.204297	0.176355	0.0449041	0.078901					0.0401256	0.112128	0.0952701
HRV	0.07702	0.145042	0.0936321	0.0706517	0.0674942	0.13371	0.0710307		0.144258	0.079033		0.0587359	0.061549	0.0650091	0.159009	0.157006	0.171591	0.164781	0.20635	0.182836	0.0582826	0.0822158					0.0736564	0.14262	0.122004
GIN	0.0862482	0.151055	0.0669754	0.0818973	0.0513882	0.1189	0.051449		0.162181	0.0668796		0.0545331	0.0598803	0.0475928	0.172516	0.172786	0.194894	0.181608	0.239539	0.211768	0.0467527	0.0939528					0.0400155	0.114357	0.0977302
SOM	0.060936	0.0885041	0.06813	0.0560786	0.0544213	0.111403	0.0538359		0.120571	0.0690587		0.0666324	0.0723289	0.0461613	0.121904	0.126678	0.151592	0.131722	0.198771	0.164815	0.0501344	0.0759193					0.0434961	0.131261	0.107594
NZL	0.0616985	0.108591	0.0853478	0.0535069	0.0562612	0.122727	0.0555646		0.119936	0.0780295		0.0699751	0.0724479	0.0475232	0.130328	0.130763	0.146383	0.135985	0.183303	0.153876	0.0525291	0.0723613					0.0623177	0.14927	0.11932
LTU	0.0616059	0.110085	0.0807225	0.0553389	0.0671487	0.115716	0.0706951		0.117802	0.0709315		0.0584833	0.0611945	0.0631861	0.128264	0.128252	0.142922	0.13395	0.176365	0.151795	0.0579405	0.0694495					0.0615314	0.132317	0.109876
ZAF	0.0571663	0.0990008	0.0567772	0.0531647	0.0452549	0.0910137	0.0464079	0.095271	0.10864	0.0534956	0.0688872	0.0443862	0.0477433	0.0419138	0.116711	0.117451	0.132579	0.122989	0.163914	0.142875	0.040215	0.0637604	0.101599	0.116332	0.105016	0.136616	0.0385898	0.0959695	0.0808046
DNK	0.0551207	0.0952567	0.113754	0.0480213	0.0692879	0.142086	0.0724517		0.107404	0.0901733		0.0710303	0.0735032	0.0634825	0.116295	0.117175	0.131976	0.121805	0.16594	0.139112	0.0603557	0.0650875	0.191698	0.20731	0.1329	0.169886	0.100022	0.175898	0.149475
CHN	0.0526981	0.094511	0.0460996	0.0491066	0.0585529	0.0770428	0.0635718	0.0799704	0.0992446	0.0443966	0.0576449	0.0360827	0.0387534	0.0583194	0.108334	0.108304	0.12054	0.113565	0.146728	0.129566	0.0484156	0.0572261	0.0839151	0.0958158	0.0954267	0.121064	0.0294622	0.0774681	0.064927
HUN	0.0670973	0.121369	0.0797897	0.0612843	0.0664451	0.117309	0.0701145	0.0625636	0.127128	0.0702856	0.0490158	0.0560846	0.0591058	0.0634232	0.138464	0.138006	0.153228	0.144499	0.187489	0.163561	0.0571136	0.0739622					0.0599904	0.128399	0.108021
BGR	0.0765314	0.144177	0.0914636	0.0707915	0.0657934	0.130787	0.0696179	0.0627457	0.142856	0.0764555	0.0484854	0.0552037	0.0581325	0.0641682	0.15737	0.155356	0.169794	0.16321	0.203623	0.181467	0.0563816	0.081023					0.0726094	0.136804	0.118477
SRB	0.0837081	0.156911	0.0818543	0.0775526	0.0517549	0.12776	0.05187		0.156361	0.0739159		0.0567033	0.0600604	0.0477568	0.171496	0.169403	0.185636	0.177992	0.223215	0.198668	0.0473821	0.088887					0.0578684	0.12957	0.109644
ARE	0.0475311	0.0805373	0.0715518	0.0426288	0.0462665	0.0989984	0.0472559	0.0717427	0.0920248	0.0614269	0.05396	0.0508038	0.0534146	0.041424	0.0991596	0.100369	0.113846	0.104547	0.142836	0.121274	0.0414409	0.0553842	0.123228	0.136871	0.0997135	0.130572	0.0570347	0.116794	0.0980511
KEN	0.0674488	0.111821	0.0910222	0.0634386	0.0491722	0.129248	0.0495832		0.128884	0.0767728		0.0590271	0.0638552	0.0446105	0.135357	0.137248	0.157709	0.143731	0.197908	0.171332	0.0443837	0.0766983					0.0738371	0.141959	0.124948
ETH	0.0819315	0.138034	0.0731237	0.0759536	0.0567132	0.125539	0.0558268		0.156915	0.0745374		0.0671733	0.0725205	0.0495391	0.165221	0.166861	0.190718	0.174604	0.239336	0.206013	0.0526754	0.0935724					0.0436012	0.134371	0.110209
TUN	0.059629	0.0895124	0.0638305	0.0555371	0.0510054	0.10457	0.0510342		0.11672	0.063545		0.0589343	0.0642815	0.0445177	0.119125	0.123109	0.145964	0.128311	0.189143	0.159004	0.0463798	0.0723162					0.0415449	0.118834	0.0989933
PER	0.0753322	0.143728	0.0556824	0.0708794	0.0452196	0.0972047	0.0464744		0.139198	0.0535017		0.0395741	0.0425029	0.0439358	0.153923	0.15149	0.164717	0.159556	0.195263	0.176949	0.040188	0.0776578					0.0339805	0.0879345	0.0748223
ITA	0.075865	0.14094	0.0817153	0.0699464	0.0668792	0.123107	0.0704996		0.142294	0.0721821		0.0555357	0.0586448	0.0645639	0.155953	0.154438	0.169774	0.162089	0.205078	0.181465	0.0575687	0.0814104	0.142286	0.157665	0.1347	0.168962	0.0602758	0.12874	0.109128
GRL	0.135024	0.279131	0.0886667	0.127651	0.0530205	0.155377	0.0531478		0.243676	0.0808034		0.0486205	0.051329	0.0540125	0.275845	0.265764	0.278747	0.281331	0.317204	0.297965	0.0487597	0.12985					0.0553913	0.121897	0.106682
SVK	0.0736784	0.138325	0.0910295	0.067896	0.0656598	0.128939	0.0695047	0.133182	0.137853	0.0758958	0.0933489	0.0553337	0.0581468	0.0638123	0.151854	0.150064	0.164202	0.157547	0.197381	0.175283	0.0562518	0.0784623					0.0727417	0.136786	0.118093
KHM	0.0751593	0.135867	0.0730464	0.0716952	0.0454204	0.113915	0.0465592		0.139987	0.0638136		0.0453011	0.0494571	0.0438409	0.151187	0.150515	0.167542	0.158449	0.202701	0.181812	0.0402747	0.0796298					0.0543331	0.109909	0.0980239
BRA	0.0670111	0.122687	0.0545428	0.0627773	0.0454067	0.0931858	0.04658	0.0828017	0.12533	0.0528032	0.0604985	0.0418428	0.0450442	0.0430768	0.136769	0.13592	0.150302	0.142807	0.181621	0.161747	0.0403817	0.0715154					0.0340027	0.0902685	0.0760873
JOR	0.0521309	0.0854736	0.0722659	0.0479007	0.0465838	0.103163	0.0474737		0.100739	0.0628782		0.0516967	0.0552368	0.0419431	0.106602	0.108499	0.124749	0.113211	0.157567	0.134383	0.0416803	0.0607787					0.0567194	0.118254	0.100883
KGZ	0.0770013	0.137107	0.0754379	0.0732473	0.0472465	0.118357	0.0480513		0.144112	0.0669581		0.0493672	0.0538568	0.0448246	0.154671	0.154464	0.173	0.162459	0.21088	0.187786	0.0422628	0.0827143					0.0552678	0.116515	0.102923
UZB	0.0578372	0.100296	0.0693708	0.0544462	0.0437781	0.10143	0.0451798		0.109355	0.0591982		0.0443599	0.0479001	0.0412917	0.117317	0.118006	0.133223	0.123757	0.164098	0.144192	0.0385529	0.0637399					0.0546023	0.106955	0.0940322
RUS	0.066621	0.120843	0.0731847	0.0625183	0.0274202	0.109178	0.0249794	0.0618607	0.124799	0.0629823	0.0472989	0.0462403	0.0495974	0.0230644	0.135682	0.135107	0.149979	0.141928	0.181857	0.161631	0.0276741	0.0714624					0.0561129	0.111626	0.0975648
JAM	0.0720675	0.128819	0.0767932	0.0673359	0.048663	0.117274	0.0492445		0.135725	0.0682571		0.0527092	0.0565391	0.0450203	0.146467	0.14624	0.163355	0.153479	0.199726	0.176038	0.0439183	0.0784955					0.05662	0.121734	0.104793
POL	0.0633446	0.112753	0.0846205	0.056319	0.0695672	0.121261	0.0726971		0.121707	0.0751894		0.0636562	0.0663674	0.0644732	0.132357	0.132444	0.147788	0.13816	0.183197	0.156487	0.0606232	0.0722526					0.0637832	0.141419	0.116072
NOR	0.0854832	0.159361	0.0931056	0.0747437	0.0640801	0.144304	0.0621048		0.16348	0.0900639		0.081652	0.0841249	0.0536643	0.179926	0.178107	0.195321	0.185882	0.239394	0.204911	0.0611664	0.0960358					0.0605037	0.167215	0.130402
PRK	0.0729146	0.110035	0.0879342	0.0675142	0.0579257	0.13664	0.0567289		0.142922	0.0837757		0.075975	0.0823778	0.048957	0.145351	0.149916	0.177666	0.15623	0.230682	0.193232	0.0539304	0.0887389					0.0617264	0.158306	0.132636
ARM	0.0756927	0.140005	0.0749223	0.0712651	0.0468196	0.115676	0.0477559	0.0629026	0.140937	0.0656732	0.0482635	0.047573	0.0511132	0.0446183	0.153835	0.152429	0.167987	0.160354	0.202022	0.181033	0.041896	0.0798704					0.0553018	0.113923	0.09953
BLR	0.095522	0.145204	0.10033	0.0891454	0.0663774	0.165138	0.0636658		0.186438	0.100009		0.0924563	0.100911	0.0549599	0.188598	0.194042	0.229923	0.202524	0.298012	0.250814	0.0630703	0.115168					0.0649992	0.186367	0.155453
BRN	0.0762186	0.146785	0.0747246	0.0711149	0.0465075	0.114196	0.0475594		0.140974	0.0647749		0.0457149	0.0483546	0.0446563	0.156598	0.15382	0.166529	0.161913	0.19707	0.178168	0.041649	0.0786491					0.0552738	0.111397	0.096376
FIN	0.124225	0.252024	0.103179	0.11527	0.0744088	0.165964	0.0769269	0.0747069	0.227127	0.0922737	0.057021	0.0636381	0.0662227	0.0733236	0.255722	0.247702	0.262154	0.261345	0.303555	0.278699	0.0658952	0.123835					0.0703955	0.152441	0.129125
BGD	0.0783292	0.141564	0.0769953	0.0739383	0.0483578	0.120433	0.0489948		0.146532	0.0686119		0.0511794	0.0553354	0.0455196	0.158277	0.157574	0.175387	0.165675	0.21298	0.189599	0.043531	0.0838857					0.0559427	0.11973	0.104463
PRT	0.0665783	0.120799	0.0926218	0.0602556	0.0675246	0.128389	0.0710171		0.126496	0.0779999		0.0608623	0.0636753	0.0638848	0.138111	0.137591	0.152523	0.14393	0.186849	0.162233	0.0583369	0.0738334					0.0743683	0.145023	0.122912
GHA	0.0912147	0.162484	0.0735842	0.0867867	0.0515526	0.126772	0.0516031		0.170699	0.070841		0.0552159	0.0605631	0.0482087	0.1825	0.182091	0.204088	0.19158	0.249079	0.22166	0.0469255	0.0980436					0.0467769	0.120493	0.104345
UGA	0.0830388	0.150701	0.0508639	0.0790263	0.0479782	0.100407	0.0486776		0.154675	0.0545756		0.0440644	0.0485539	0.0458147	0.166944	0.165986	0.184548	0.174743	0.223265	0.200089	0.0430637	0.0879962					0.0244585	0.0884969	0.0747933
ALB	0.0841498	0.157955	0.0794318	0.0787599	0.0497813	0.124954	0.0502312		0.156491	0.071055		0.0524625	0.0560026	0.0468843	0.171517	0.169335	0.185514	0.178151	0.222235	0.199274	0.0451688	0.0883936					0.0565756	0.12267	0.1056
SWZ	0.063357	0.108936	0.0564944	0.0602028	0.0446208	0.0942355	0.0458555		0.119585	0.0535925		0.042698	0.046854	0.0421916	0.127355	0.12824	0.145408	0.134627	0.179425	0.15809	0.0394098	0.0696709					0.0376081	0.0934804	0.0809901
KAZ	0.0578991	0.104437	0.0687193	0.0541728	0.0431716	0.0996171	0.0447197		0.108723	0.0579573		0.0422833	0.0452121	0.0411062	0.118502	0.118245	0.131418	0.124105	0.159599	0.141459	0.0379477	0.0624441					0.0543584	0.103892	0.0910154
SLV	0.0838711	0.15002	0.0827538	0.0784199	0.0526077	0.130811	0.0525007		0.157902	0.0758276		0.0598819	0.0643715	0.0480066	0.169782	0.169365	0.1893	0.177815	0.231671	0.20414	0.0482037	0.0913542					0.0581336	0.134202	0.114587
KOR	0.064592	0.115328	0.0760802	0.0569691	0.0547573	0.115345	0.0543254	0.0791123	0.124386	0.0719563	0.0609379	0.0645501	0.067161	0.0471372	0.135466	0.135469	0.150961	0.141215	0.187334	0.159381	0.0508378	0.0740398					0.0520784	0.134819	0.1074
SUR	0.0840447	0.149624	0.0626903	0.0795623	0.0504138	0.112926	0.0506694		0.157619	0.0633087		0.0515739	0.0564019	0.0469829	0.168898	0.168616	0.188915	0.177264	0.230812	0.20475	0.0457301	0.0907702					0.0361972	0.107324	0.0910109
LAO	0.0788148	0.131013	0.0820497	0.0744281	0.0525976	0.129844	0.0523976		0.150291	0.0759156		0.0622298	0.0679264	0.0472823	0.157237	0.159221	0.183005	0.166885	0.229542	0.199172	0.0480739	0.0892432					0.0581925	0.136963	0.118163
GTM	0.0806857	0.152025	0.0789569	0.0750691	0.0496372	0.122469	0.0501217		0.150261	0.070298		0.0524271	0.0556285	0.0464874	0.165218	0.163035	0.178253	0.171414	0.213477	0.190951	0.0450535	0.0849728					0.0567916	0.122429	0.104647
COG	0.0903828	0.158989	0.0710228	0.0850996	0.0543271	0.125916	0.0538894		0.170368	0.0717798		0.0602244	0.0655716	0.0493773	0.181537	0.181641	0.204504	0.190762	0.251627	0.221461	0.0500087	0.0989856					0.041562	0.123971	0.104095
THA	0.0692471	0.128843	0.0514086	0.0644057	0.0465775	0.0917728	0.0475724		0.129371	0.0520478		0.0426065	0.0455353	0.0438889	0.142084	0.140705	0.15454	0.147813	0.185881	0.165639	0.0417082	0.0735511	0.0989404	0.112587	0.134035	0.16388	0.0289059	0.0881308	0.072402
NLD	0.0588299	0.101877	0.0943509	0.0506211	0.0728056	0.129248	0.0753681	0.0997613	0.115094	0.0828515	0.0747465	0.0727853	0.0752582	0.0654834	0.124611	0.125467	0.141212	0.130286	0.178088	0.148266	0.0642554	0.0701143					0.0734129	0.16057	0.130083
HTI	0.0769352	0.12169	0.0832412	0.0727911	0.0538022	0.131848	0.0533414		0.148153	0.077916		0.0660533	0.0724562	0.0475238	0.152357	0.155766	0.18214	0.163007	0.232108	0.199026	0.0493428	0.0895789					0.0589048	0.142659	0.122918
URY	0.049998	0.0855117	0.0519108	0.0459869	0.0442254	0.0825183	0.0455599		0.0956858	0.0493694		0.0423682	0.045297	0.0407233	0.10295	0.103962	0.117709	0.108641	0.146368	0.126405	0.0391335	0.0566999					0.0350458	0.0899399	0.0745892
PHL	0.0709109	0.133509	0.0635695	0.066885	0.044172	0.101545	0.0455876		0.131338	0.0567177		0.0403545	0.0433757	0.042966	0.144623	0.142794	0.156129	0.150343	0.185999	0.168057	0.0390229	0.0736429					0.0450094	0.0961204	0.0838691
LKA	0.0759425	0.11932	0.0832895	0.0717665	0.0539219	0.131536	0.0534365		0.14651	0.0779955		0.0665141	0.0729169	0.0474699	0.1504	0.153966	0.180408	0.16106	0.230427	0.197128	0.0494777	0.0888498					0.0590448	0.143306	0.123271
CIV	0.0804115	0.152688	0.0596436	0.0761536	0.0456863	0.103689	0.0468503		0.148377	0.0565554		0.0407579	0.044115	0.0446432	0.16336	0.160869	0.175375	0.169559	0.208066	0.189001	0.0406485	0.0827109					0.0373144	0.0924078	0.079923
KWT	0.0383327	0.0625751	0.0624354	0.0355816	0.0396451	0.0833318	0.041754		0.0738269	0.0504304		0.0380288	0.0406996	0.0374081	0.0789486	0.0806008	0.0925565	0.0841149	0.116186	0.099915	0.0340982	0.0442366	0.10973	0.121257	0.0980944	0.122652	0.0535293	0.0951932	0.0838618
AUT	0.0639556	0.120189	0.0928276	0.0597069	0.060245	0.12267	0.0650155		0.118998	0.0716347		0.047066	0.0496507	0.0603261	0.131472	0.129969	0.142091	0.136628	0.169781	0.152319	0.0502824	0.0671253					0.0812427	0.129806	0.116526
MYS	0.0841421	0.162558	0.051812	0.0782811	0.0492954	0.0999834	0.049878		0.155693	0.0552438		0.0445679	0.0473809	0.0467616	0.172823	0.169561	0.183384	0.178475	0.21708	0.195985	0.0447105	0.0869239					0.0243404	0.0894025	0.0720701
ZMB	0.0780407	0.132438	0.0652205	0.0739665	0.0506349	0.113424	0.0507968		0.147915	0.0648845		0.0544836	0.0598308	0.0463563	0.155893	0.157218	0.179364	0.164981	0.223061	0.195168	0.0459321	0.0869126					0.0400934	0.113463	0.0966722
LBR	0.0882348	0.155406	0.0677399	0.0837317	0.0518454	0.120682	0.0518336		0.165741	0.0677808		0.0551537	0.0605009	0.0480168	0.176609	0.176663	0.198845	0.185715	0.243934	0.215928	0.0472566	0.0958164					0.0401669	0.115558	0.0986127
MEX	0.065637	0.120972	0.050792	0.061474	0.0447044	0.0886972	0.0460073	0.0857975	0.122569	0.0499961	0.0620667	0.0397367	0.0427579	0.0426328	0.134198	0.133193	0.146859	0.139969	0.176914	0.15792	0.0396246	0.0697093	0.0960082	0.109293	0.124639	0.153141	0.0304192	0.0846817	0.0710018
MLI	0.0569525	0.0846467	0.0617209	0.0536126	0.0486239	0.100172	0.0490591		0.111233	0.0602406		0.0544319	0.0597791	0.0431451	0.113163	0.117188	0.139409	0.122239	0.18061	0.15248	0.0437401	0.0687801					0.0415515	0.112134	0.0950208
BOL	0.0900612	0.15336	0.0740631	0.0835591	0.059234	0.131883	0.0579154		0.17203	0.0778035		0.0708988	0.0765953	0.0515201	0.181434	0.182769	0.208195	0.191373	0.260412	0.224832	0.0554225	0.102144					0.0410681	0.138793	0.112921
SLE	0.0871646	0.153251	0.0669125	0.0828477	0.0512629	0.119163	0.051349		0.163692	0.0667837		0.0540751	0.0594223	0.0476358	0.174319	0.174441	0.196482	0.1834	0.241069	0.213512	0.0466118	0.0946172					0.0398771	0.113707	0.0973714
FJI	0.0652531	0.112038	0.0782372	0.0600241	0.0503847	0.116633	0.0506399		0.124799	0.0701728		0.0578645	0.0616944	0.045059	0.13326	0.134243	0.152099	0.140389	0.189517	0.163477	0.0458438	0.0740134					0.058139	0.129396	0.109262
VNM	0.0666299	0.120104	0.0662948	0.0621104	0.0467655	0.104117	0.0476896		0.12534	0.0604003		0.0473371	0.0506942	0.0436308	0.136041	0.135655	0.150934	0.142355	0.183864	0.162348	0.0418742	0.0722508					0.0468256	0.106829	0.0910173
NIC	0.072849	0.12846	0.0543175	0.0682733	0.0490473	0.099139	0.0495434		0.137473	0.0566548		0.0487362	0.0528922	0.0452353	0.147479	0.147651	0.165849	0.154937	0.203742	0.179136	0.0443075	0.0798774					0.0295446	0.0975792	0.0806493
CAN	0.0610264	0.107818	0.0930813	0.0532698	0.0548685	0.128195	0.0544129	0.0964996	0.118247	0.0809952	0.0720746	0.0691169	0.0715898	0.0468178	0.12863	0.128961	0.144182	0.134218	0.179985	0.151825	0.0509836	0.0710118					0.0727658	0.155132	0.126901
NGA	0.0716793	0.121831	0.0624267	0.0677538	0.048827	0.106434	0.0493141		0.13595	0.0612062		0.0511449	0.0559729	0.0449149	0.143739	0.144983	0.165202	0.152077	0.205317	0.179507	0.043992	0.0799012					0.0395118	0.107662	0.0916898
BHS	0.062648	0.106189	0.0775482	0.0575398	0.0500388	0.114717	0.0503447		0.120229	0.069377		0.0576123	0.0614422	0.044618	0.127956	0.129259	0.147095	0.135079	0.184129	0.158153	0.0454647	0.0717167					0.0580975	0.128729	0.108683
TJK	0.0732118	0.128395	0.0748834	0.0695215	0.0471056	0.116173	0.047921		0.137606	0.0663519		0.0498025	0.054292	0.0443476	0.147049	0.147357	0.165974	0.154845	0.203578	0.18023	0.0421137	0.079584					0.055432	0.116843	0.102906
BLZ	0.087696	0.15533	0.0864299	0.0816765	0.0553129	0.137743	0.0547255		0.16575	0.0805169		0.065506	0.0703341	0.0496044	0.177448	0.177347	0.199008	0.186049	0.244894	0.214508	0.0511642	0.0965525					0.0594802	0.143524	0.121342
PNG	0.0802888	0.146421	0.0765113	0.0760581	0.0478072	0.120525	0.0485477		0.149652	0.0679764		0.0495739	0.0537299	0.0454833	0.162061	0.161002	0.178585	0.169423	0.215834	0.193183	0.0429155	0.0851424					0.0554715	0.117328	0.103051
ESP	0.069866	0.125558	0.108164	0.0624293	0.0713835	0.145591	0.0742058	0.0848914	0.133696	0.0899366	0.0647598	0.0711928	0.0741216	0.0659788	0.145441	0.145166	0.161509	0.151596	0.199415	0.171213	0.0626034	0.0789071	0.177721	0.19471	0.115597	0.155087	0.0888918	0.170038	0.143504
JPN	0.103964	0.205576	0.135632	0.0957787	0.0725067	0.183961	0.0752763	0.116994	0.191965	0.107278	0.0841422	0.0716219	0.0742926	0.0702402	0.214505	0.209203	0.223998	0.220231	0.263337	0.238058	0.0638128	0.106571					0.114143	0.191616	0.168056
DOM	0.0717785	0.129804	0.0769817	0.0667569	0.0488036	0.116963	0.0493784		0.135051	0.068288		0.0527372	0.0562774	0.0450921	0.146501	0.145931	0.162216	0.153138	0.19763	0.174336	0.0441072	0.0778736					0.0567909	0.121887	0.104364
DZA	0.0537797	0.0919174	0.0547428	0.0502207	0.043884	0.0869906	0.0452641		0.10234	0.051059		0.0420188	0.0453759	0.0409224	0.109584	0.110608	0.125431	0.115806	0.155547	0.135474	0.038699	0.0602399	0.100695	0.115022	0.112525	0.142953	0.0379651	0.0918048	0.0779527
TUR	0.0947791	0.175797	0.0915886	0.0867904	0.0587891	0.145805	0.0576845		0.178344	0.0860162		0.0706494	0.0744793	0.0520916	0.194501	0.1925	0.21194	0.201934	0.257221	0.226153	0.0551203	0.102647	0.162914	0.182688	0.166556	0.211179	0.0613868	0.153001	0.126043
IRN	0.0670443	0.113137	0.0763415	0.0628659	0.0487861	0.115797	0.0492848	0.101075	0.127765	0.0682719	0.0743877	0.0547392	0.0592287	0.0444381	0.135126	0.136547	0.155872	0.143035	0.194519	0.168925	0.0439924	0.0755984					0.0568825	0.124215	0.107229
COL	0.0674969	0.124473	0.0560277	0.0628773	0.0461465	0.0948426	0.0472041		0.126299	0.0541514		0.0432804	0.0463016	0.04349	0.138287	0.137224	0.151266	0.144123	0.182529	0.162343	0.0412225	0.0720429					0.0350542	0.0931072	0.0778092
FLK	0.135453	0.273621	0.0918644	0.127972	0.0556746	0.161158	0.0552844		0.246129	0.0853313		0.055401	0.058947	0.0551501	0.275711	0.267113	0.28343	0.282435	0.327026	0.303672	0.0516129	0.133097					0.056821	0.132509	0.114928
SWE	0.0597166	0.110789	0.0760303	0.055266	0.0606601	0.106595	0.0653496	0.0440914	0.111853	0.0626195	0.0350701	0.0449747	0.0474476	0.0600677	0.123312	0.122313	0.134358	0.128361	0.16178	0.143699	0.0507642	0.0637746					0.0618087	0.11307	0.0985208
GMB	0.0614099	0.107069	0.0548257	0.0583685	0.043389	0.0907386	0.0448531		0.115521	0.0513448		0.0399743	0.0438042	0.041465	0.123795	0.124326	0.140191	0.130582	0.171974	0.152249	0.0380816	0.0668592					0.0370468	0.0890335	0.0774724
AUS	0.0606849	0.105872	0.0860522	0.0522966	0.0569134	0.12329	0.0560991		0.118466	0.0789173		0.0716189	0.0740918	0.0477087	0.128464	0.129135	0.144985	0.134158	0.182371	0.152214	0.0532555	0.0719246	0.15482	0.17183	0.144087	0.185105	0.0627891	0.151828	0.120887
HND	0.0807278	0.147384	0.0810082	0.0751118	0.0513699	0.126233	0.0515103		0.151525	0.0732721		0.0569944	0.0608244	0.0471928	0.164491	0.163423	0.181076	0.171604	0.219942	0.194547	0.0469077	0.0870343					0.0577225	0.129524	0.110266
QAT	0.0410465	0.0693456	0.0624626	0.0382936	0.0394394	0.0843038	0.0415983		0.0783169	0.0503662		0.0369677	0.0395785	0.0376187	0.0844489	0.0856042	0.0972278	0.0895141	0.120598	0.104918	0.0338711	0.046203					0.0532351	0.0937746	0.0830158
CRI	0.0820033	0.152027	0.0812932	0.0761042	0.0514616	0.126645	0.0516097		0.153495	0.0733903		0.0566058	0.0601459	0.047413	0.167644	0.166006	0.182763	0.174375	0.220703	0.195909	0.0470393	0.0876427					0.0577592	0.129157	0.109601
BIH	0.10333	0.193714	0.0878851	0.0969795	0.055179	0.145099	0.0546948		0.19203	0.0817529		0.061738	0.0662275	0.0512946	0.209391	0.206586	0.226667	0.217472	0.271901	0.243903	0.0510215	0.108501					0.0584354	0.139134	0.118885
MDA	0.0685169	0.11505	0.079782	0.0635053	0.0514502	0.120987	0.0514885		0.131313	0.0724786		0.0603468	0.0648364	0.0458077	0.138748	0.140341	0.160423	0.146788	0.201217	0.173219	0.0469483	0.07833					0.0584354	0.13343	0.113181
CHE	0.0921024	0.172898	0.10205	0.0803288	0.0673052	0.156742	0.0647906	0.0560134	0.176008	0.0979808	0.0493819	0.0884306	0.0909035	0.0558495	0.193995	0.191697	0.209672	0.200087	0.256555	0.219659	0.0647355	0.103234					0.0671427	0.182133	0.142044
RWA	0.080896	0.148803	0.0600624	0.0771962	0.0460833	0.105691	0.0471275		0.150012	0.0576316		0.0424776	0.0466336	0.0447671	0.16284	0.16145	0.178492	0.170111	0.21442	0.193485	0.0409997	0.0846297					0.0373503	0.0948641	0.0829155
FRA	0.063781	0.113018	0.11545	0.0560468	0.0716499	0.148933	0.074422	0.0527466	0.123206	0.0936322	0.0443392	0.0742941	0.0769339	0.0654758	0.1339	0.134122	0.149864	0.139713	0.186661	0.158135	0.0629435	0.0736971	0.194502	0.21112	0.138149	0.177499	0.0984262	0.180368	0.152282
PAK	0.078915	0.13287	0.0831827	0.0739601	0.0534628	0.130857	0.0531336	0.0775313	0.15051	0.0770627	0.0612704	0.0637321	0.0690792	0.0477351	0.158359	0.159963	0.182936	0.167589	0.228881	0.198366	0.0490713	0.0892582					0.0588003	0.139554	0.119204
IRL	0.0615045	0.108181	0.103919	0.0540267	0.0708611	0.137631	0.0737626		0.119023	0.0866058		0.070727	0.0733667	0.0648696	0.129142	0.129574	0.145152	0.134925	0.181232	0.153229	0.0620719	0.0714076					0.0858697	0.166438	0.139062
LUX	0.0672146	0.120296	0.101529	0.0583938	0.0746383	0.140087	0.0769115		0.130083	0.0887116		0.0760842	0.0785571	0.0672291	0.141862	0.141792	0.157819	0.147594	0.196495	0.165776	0.0662744	0.0779237					0.0788092	0.169865	0.138162
LVA	0.0643114	0.1171	0.0889772	0.0588572	0.06476	0.122623	0.0687274		0.121557	0.073558		0.0551886	0.0580017	0.062383	0.132873	0.132281	0.14645	0.13856	0.178515	0.156318	0.0552708	0.0704044					0.0728058	0.135622	0.116794
BWA	0.0540607	0.0972205	0.0517889	0.050803	0.0414051	0.0822672	0.0432555		0.101404	0.0470267		0.0358324	0.0386455	0.0399018	0.1106	0.110474	0.122885	0.115977	0.149097	0.13248	0.0360062	0.0581425					0.0365316	0.0820859	0.0708314
LBN	0.106467	0.171571	0.0992989	0.100567	0.064654	0.167901	0.0622844		0.204395	0.0985177		0.0864828	0.0949373	0.0553707	0.210076	0.213724	0.24873	0.223867	0.315951	0.271531	0.0611348	0.122973					0.063205	0.177792	0.150648
MNG	0.0568203	0.0921533	0.0737599	0.0528127	0.0474869	0.10792	0.0481962		0.109579	0.0650626		0.0534922	0.0576482	0.04278	0.114993	0.117212	0.135458	0.12244	0.171428	0.146673	0.0426059	0.0660767					0.0568305	0.121337	0.104203
NAM	0.0604195	0.101874	0.0583412	0.0557928	0.0485231	0.0964394	0.0490857		0.115843	0.0575777		0.0509358	0.0547657	0.0436872	0.123111	0.124514	0.141963	0.130166	0.177715	0.152964	0.0437857	0.0690439					0.0370626	0.104565	0.0861809
IND	0.0702141	0.131903	0.0559006	0.0665616	0.0432213	0.0942508	0.0447947	0.0667899	0.129852	0.051775	0.0493485	0.0370822	0.0401913	0.0424466	0.142812	0.14107	0.154407	0.148603	0.183822	0.166552	0.0379585	0.072673	0.0992988	0.112014	0.112479	0.139056	0.0368621	0.0857918	0.0747892
TZA	0.0755565	0.138412	0.0594842	0.0716287	0.0460092	0.102375	0.0470677		0.140626	0.0567951		0.042986	0.0468159	0.0441962	0.152781	0.151682	0.167881	0.159641	0.202332	0.181547	0.040964	0.0797612					0.0377314	0.0953075	0.0823078
MAR	0.0457121	0.0737334	0.0548273	0.0418442	0.0445885	0.0837999	0.0458257		0.0887553	0.0512146		0.0449855	0.0481869	0.040384	0.0939197	0.0959694	0.110794	0.100007	0.14054	0.119263	0.0395148	0.0539059	0.0995041	0.114064	0.100451	0.132053	0.0389717	0.095876	0.07979
NER	0.057327	0.0828081	0.0619046	0.0539583	0.0496776	0.101654	0.0499082		0.112573	0.0614661		0.0568419	0.0625384	0.0436149	0.113478	0.118088	0.141685	0.123068	0.184998	0.155221	0.0448729	0.0702613					0.0407965	0.115069	0.0970748
PRY	0.0596962	0.10522	0.0566123	0.0548468	0.0472636	0.0928086	0.048091		0.113529	0.0550916		0.0473955	0.0505046	0.0431348	0.122778	0.1231	0.137999	0.12882	0.170113	0.147885	0.0424687	0.066559					0.0362445	0.0989468	0.0812146
OMN	0.0507636	0.0813352	0.0787317	0.0446085	0.0518849	0.110816	0.0518651		0.100207	0.0706251		0.063303	0.0665044	0.0442461	0.10588	0.108253	0.12512	0.112319	0.16079	0.133033	0.0476086	0.0622067					0.0601699	0.137049	0.112168
SVN	0.0856206	0.1621	0.100839	0.0776168	0.0726262	0.146673	0.0752974	0.0703602	0.160905	0.0877327	0.055247	0.0684021	0.0712152	0.0682758	0.177527	0.175037	0.190895	0.183526	0.230042	0.202489	0.0639657	0.0921149					0.0762654	0.159106	0.133008
VEN	0.114612	0.188086	0.0880095	0.107362	0.0688701	0.164318	0.0657937		0.219907	0.0964015		0.0904053	0.0988597	0.058172	0.227448	0.230544	0.26656	0.24142	0.337434	0.289806	0.0658015	0.131973					0.0447869	0.171637	0.14014
MKD	0.0888522	0.168366	0.0809959	0.0831638	0.0506649	0.128843	0.0509778		0.164841	0.0728859		0.0534915	0.0570316	0.0477979	0.181155	0.178433	0.194728	0.187815	0.232345	0.209019	0.046141	0.0926897					0.056811	0.1248	0.107236
AZE	0.0829767	0.157711	0.0783751	0.0775515	0.0489805	0.122555	0.0495882		0.153904	0.0695353		0.0505213	0.0537228	0.046439	0.169639	0.167037	0.181983	0.175791	0.216794	0.195133	0.0443196	0.0864345					0.0562326	0.119574	0.102966
ZWE	0.0728237	0.120095	0.0652195	0.068646	0.0510577	0.111444	0.0511264		0.1392	0.0649887		0.0564485	0.0617956	0.0459796	0.145555	0.147679	0.170122	0.154687	0.21392	0.185086	0.046412	0.0829612					0.0407016	0.116123	0.0980541
ISR	0.0519893	0.0872118	0.0758229	0.0463648	0.0493988	0.106938	0.0498362		0.101098	0.0668235		0.057235	0.0601638	0.0432884	0.108246	0.109713	0.124959	0.114194	0.157748	0.133028	0.0448755	0.061306					0.0586089	0.127487	0.105678
CZE	0.0677121	0.126395	0.0700941	0.0622941	0.064107	0.107301	0.0682126	0.0713849	0.126948	0.0628398	0.0534958	0.0488143	0.051454	0.0624808	0.139861	0.138453	0.151788	0.145271	0.182861	0.161974	0.0545582	0.0724793					0.0503926	0.111562	0.0938457
CYP	0.086512	0.165807	0.097339	0.0794032	0.0697224	0.1423	0.0729047		0.161287	0.0834056		0.0617975	0.0646106	0.067055	0.178577	0.175547	0.190498	0.184423	0.227415	0.202739	0.0607388	0.0911457					0.0744071	0.148513	0.12632
SEN	0.0595269	0.10199	0.0428522	0.0561056	0.0446473	0.0804727	0.0458843		0.112808	0.0458438		0.0401996	0.0440296	0.0418308	0.120343	0.12132	0.137627	0.127203	0.17031	0.149185	0.0394827	0.066075					0.0221683	0.0789617	0.0654998
COD	0.0835255	0.151414	0.0779096	0.0792817	0.0487165	0.124159	0.0492886		0.155792	0.0698699		0.0513353	0.0558249	0.0462029	0.168105	0.167183	0.185953	0.17594	0.225268	0.201434	0.0438827	0.0888165					0.0557456	0.120346	0.105749
GEO	0.0723873	0.135723	0.0695989	0.0690787	0.0427587	0.106969	0.0444048		0.133573	0.0590542		0.0390188	0.0423759	0.0424399	0.146553	0.144782	0.158663	0.152637	0.188714	0.171633	0.0374127	0.0745556					0.0530459	0.0998471	0.0900549
IDN	0.0728191	0.13568	0.0687002	0.0675451	0.0481682	0.109175	0.0488921		0.136149	0.0629966		0.0488253	0.0518465	0.0449876	0.149455	0.147925	0.162406	0.155371	0.195482	0.173904	0.0434575	0.0774985					0.0473586	0.110009	0.092821
ROU	0.0817821	0.152402	0.0982693	0.0745881	0.0708952	0.142223	0.0738354	0.0671339	0.153936	0.0848586	0.0529876	0.0656766	0.0687857	0.0670316	0.168816	0.167035	0.183393	0.175132	0.222096	0.195239	0.0620175	0.0885027					0.0753818	0.154177	0.130161
GUY	0.0783061	0.150069	0.0572026	0.0735314	0.046208	0.100379	0.0473011		0.144647	0.0553135		0.041176	0.0441048	0.0447086	0.160128	0.157414	0.170843	0.165798	0.202292	0.183336	0.04128	0.0806242					0.0343955	0.0908202	0.0768358
MOZ	0.0785124	0.132703	0.0627357	0.0739808	0.0521032	0.112398	0.0520102		0.149293	0.0648148		0.0566861	0.0620333	0.0470742	0.157209	0.158676	0.181251	0.166371	0.226116	0.196864	0.0475621	0.0881448					0.0358286	0.113731	0.095095
NPL	0.0777849	0.144637	0.0756198	0.0732241	0.047214	0.117408	0.0480891		0.144653	0.0664897		0.0480336	0.0515737	0.0450254	0.158124	0.156478	0.172087	0.164654	0.206522	0.18537	0.0423299	0.0817825					0.0554074	0.114876	0.100261
PAN	0.0747899	0.139491	0.077082	0.0694505	0.0485878	0.117564	0.0492399		0.139739	0.0680423		0.0511572	0.0542662	0.045381	0.153332	0.151705	0.166517	0.159377	0.200327	0.178379	0.0439099	0.0794704					0.0565532	0.119834	0.102482
ISL	0.145615	0.296746	0.105465	0.134211	0.0657468	0.181947	0.0636908		0.266649	0.101246		0.0746626	0.0773334	0.0609479	0.300344	0.290523	0.306895	0.306387	0.355625	0.32534	0.0628776	0.145699					0.0625819	0.165083	0.134728
CHL	0.0498985	0.0862583	0.0531085	0.0455244	0.0447981	0.0835215	0.0460464		0.0955624	0.0503681		0.0435013	0.0462125	0.0410019	0.103328	0.104133	0.117395	0.108762	0.145706	0.125602	0.0397942	0.056599	0.0976638	0.110871	0.106301	0.135577	0.0360083	0.0922246	0.0758468
SAU	0.0514132	0.0857257	0.0799208	0.0445138	0.0527259	0.111782	0.0525984		0.101183	0.0716741		0.0643729	0.0670127	0.0447749	0.108509	0.110129	0.125521	0.114249	0.159834	0.13242	0.0486042	0.0623051	0.14056	0.156712	0.118366	0.156369	0.0607728	0.13911	0.112534
YEM	0.0923422	0.153934	0.0924561	0.0861946	0.0600066	0.150096	0.0585182		0.176805	0.0889513		0.0767513	0.0831542	0.052019	0.184774	0.186885	0.214635	0.195675	0.270128	0.232678	0.0562034	0.105576					0.0617264	0.161489	0.135819
BEL	0.0631249	0.110556	0.0994571	0.0548785	0.0733143	0.136008	0.0757929	0.0882347	0.12274	0.0863621	0.0675556	0.0741561	0.0767958	0.0661597	0.133007	0.13356	0.149826	0.138909	0.187895	0.157705	0.0647934	0.0741358					0.0782232	0.166262	0.135918
USA	0.0569202	0.102821	0.0801002	0.051672	0.0418024	0.110467	0.0417269	0.0515917	0.108119	0.0669218	0.0408511	0.0515753	0.0540482	0.0371402	0.118378	0.118148	0.131075	0.123572	0.160425	0.139541	0.0385198	0.0630478	0.134336	0.147452	0.101349	0.131132	0.0649316	0.12432	0.105967
UKR	0.0843517	0.13623	0.0985036	0.0787045	0.0585273	0.150934	0.0572679	0.0666097	0.162625	0.0905715	0.0567391	0.076959	0.0833619	0.0504767	0.168401	0.171433	0.198995	0.179262	0.252982	0.216129	0.0545761	0.0982891					0.0716075	0.1677	0.142841
SLB	0.0822485	0.145801	0.079072	0.077965	0.0498022	0.125772	0.0501581		0.154322	0.0715669		0.0543799	0.059208	0.0465095	0.165146	0.165032	0.185204	0.173489	0.226544	0.200885	0.0450544	0.08897					0.0564274	0.12499	0.109223
GBR	0.0607378	0.104879	0.111961	0.0524278	0.0571203	0.145811	0.056259	0.0908533	0.118773	0.0932233	0.0693966	0.077905	0.0805447	0.0477856	0.12829	0.129216	0.145634	0.134215	0.18379	0.153119	0.0534665	0.0723583					0.0932513	0.181645	0.150648
SYR	0.0641666	0.0772425	0.0867041	0.0605822	0.0578991	0.134902	0.0565534		0.129749	0.083864		0.0798686	0.0883231	0.0476944	0.123676	0.132351	0.166685	0.137302	0.226774	0.184487	0.0537154	0.0850203					0.061827	0.162898	0.138651
MNE	0.0907673	0.169082	0.0855064	0.0842234	0.054194	0.136096	0.053878		0.169719	0.0786081		0.0612673	0.0650972	0.0495688	0.185306	0.183219	0.2014	0.19252	0.242913	0.215841	0.0500246	0.0967508					0.058806	0.13743	0.115895
BEN	0.0740662	0.134917	0.0594154	0.0701261	0.0460745	0.101717	0.0471161		0.138115	0.0567404		0.0434244	0.0472543	0.0440634	0.149814	0.148935	0.165203	0.156684	0.199639	0.178638	0.0410394	0.0786003					0.0378708	0.0958687	0.0825761
LBY	0.0411914	0.0664764	0.0509067	0.0379935	0.0417505	0.0763797	0.043485		0.0797273	0.0462832		0.0392713	0.0422001	0.0386402	0.084692	0.0865983	0.0998824	0.090294	0.126221	0.107727	0.0364021	0.048178					0.0375739	0.0863156	0.072959
BFA	0.0691278	0.11614	0.06167	0.0653412	0.048422	0.104448	0.0489705		0.131449	0.060326		0.0507513	0.0555793	0.044453	0.138528	0.140075	0.160255	0.146857	0.199942	0.174258	0.0435472	0.0776134					0.0394301	0.106772	0.0909717
PSE	0.0742604	0.0969083	0.0959354	0.0685627	0.0645481	0.151157	0.0620773		0.149531	0.0950267		0.0925987	0.101053	0.0518123	0.145568	0.153761	0.189777	0.159491	0.255505	0.207877	0.0610804	0.0970016					0.0652768	0.184487	0.152991
GRC	0.0791429	0.146109	0.0936191	0.0722516	0.0702177	0.136846	0.0732605		0.149254	0.0816905		0.0640296	0.067231	0.0664239	0.163177	0.161802	0.178322	0.169592	0.216714	0.190058	0.0612599	0.0861361					0.0709353	0.148492	0.125104
ARG	0.0806888	0.12862	0.0702226	0.0755486	0.0569535	0.124258	0.0559556	0.0866118	0.155774	0.0737401	0.0690857	0.06849	0.0748928	0.0493632	0.16067	0.163996	0.1912	0.171465	0.243796	0.208078	0.0528353	0.0944285					0.040151	0.133688	0.110367
IRQ	0.0607367	0.0952141	0.078399	0.0561942	0.0510047	0.116706	0.0510703		0.118175	0.0711729		0.0612836	0.0661116	0.0447106	0.122382	0.125485	0.146717	0.130879	0.188054	0.159031	0.0464321	0.0723628					0.0586	0.134021	0.113688
MDG	0.0620378	0.105621	0.0569209	0.0587505	0.045073	0.0943092	0.0462237		0.117516	0.0541443		0.0439592	0.0481152	0.0422531	0.124828	0.125965	0.143312	0.132129	0.177624	0.15572	0.0399146	0.0688723					0.0379758	0.0953892	0.0821262
CMR	0.0849074	0.151849	0.0652262	0.0805431	0.0500178	0.11522	0.0503459		0.158932	0.064386		0.0511729	0.0560009	0.0468972	0.170524	0.170064	0.190216	0.178867	0.231841	0.206247	0.0452886	0.0912342					0.0393717	0.109019	0.0933419
GAB	0.0911236	0.160617	0.0785166	0.0857866	0.0544879	0.132731	0.0540248		0.171692	0.0760099		0.0620211	0.0673683	0.049531	0.183061	0.183082	0.20597	0.192291	0.253251	0.223007	0.0501858	0.0996749					0.0501557	0.132498	0.112516
SDN	0.0617464	0.0718411	0.0716144	0.058292	0.0575207	0.120749	0.0562321		0.125482	0.075254		0.0763481	0.0848025	0.0472588	0.118735	0.127699	0.161997	0.132352	0.221684	0.179511	0.0532999	0.0828537					0.0447404	0.145917	0.121824
EGY	0.0560736	0.0841743	0.0560684	0.0514344	0.0513964	0.0958776	0.0513763		0.110391	0.0591899		0.0581593	0.0629873	0.0443801	0.113145	0.116964	0.138466	0.121682	0.179905	0.150027	0.0468764	0.068839	0.107224	0.12825	0.124552	0.169572	0.0327124	0.111336	0.0898422
AGO	0.0825258	0.149051	0.0635255	0.0782634	0.0487936	0.111495	0.0493485		0.15412	0.0621		0.0485431	0.0530327	0.0461289	0.166123	0.165354	0.184179	0.173966	0.223511	0.1995	0.0439703	0.088057					0.0388469	0.104683	0.0898461
CUB	0.0884484	0.145136	0.0915498	0.0824505	0.0595895	0.147399	0.0581595		0.170014	0.0879139		0.0765957	0.0829986	0.0514053	0.176872	0.179475	0.207225	0.187769	0.262222	0.224772	0.0557478	0.102202					0.0617264	0.160851	0.135181

## Sheet: Comp_Base24_PEM
	c_elec	c_pw	repex	c_capex	c_om
ECU	0.105727	0.000174741	0.0404244	0.0577492	0.0158984
DEU	0.112094	0.000174741	0.0163419	0.0233456	0.0430292
EST	0.118672	0.000174741	0.0178394	0.0254848	0.0173547
MMR	0.0987976	0.000174741	0.0404244	0.0577492	0.00388622
MWI	0.0817439	0.000174741	0.0378559	0.0540799	0.00279112
HRV	0.126019	0.000174741	0.0189168	0.0270241	0.0218261
GIN	0.0851636	0.000174741	0.0378559	0.0540799	0.00238805
SOM	0.0785043	0.000174741	0.0404244	0.0577492	0.012931
NZL	0.0958876	0.000174741	0.0163419	0.0233456	0.0397658
LTU	0.116405	0.000174741	0.0181457	0.0259224	0.0255077
ZAF	0.0800798	0.000174741	0.0230275	0.0328964	0.00965078
DNK	0.109629	0.000174741	0.0163419	0.0233456	0.0336207
CHN	0.106945	0.000174741	0.0178394	0.0254848	0.00845769
HUN	0.118888	0.000174741	0.0204913	0.0292732	0.020387
BGR	0.126165	0.000174741	0.0197922	0.0282746	0.0172692
SRB	0.136214	0.000174741	0.0230275	0.0328964	0.0179472
ARE	0.0973427	0.000174741	0.017386	0.0248371	0.0195594
KEN	0.0819587	0.000174741	0.034022	0.0486028	0.00562
ETH	0.0841955	0.000174741	0.0378559	0.0540799	0.0155172
TUN	0.098274	0.000174741	0.0378559	0.0540799	0.00798797
PER	0.109539	0.000174741	0.0197922	0.0282746	0.0081826
ITA	0.124227	0.000174741	0.0211555	0.0302221	0.0186207
GRL	0.136175	0.000174741	0.0181255	0.0258936	0.012931
SVK	0.124442	0.000174741	0.0189168	0.0270241	0.0184767
KHM	0.0969584	0.000174741	0.0290234	0.0414621	2.05397e-06
BRA	0.102904	0.000174741	0.0218528	0.0312183	0.0087032
JOR	0.097962	0.000174741	0.0244059	0.0348656	0.0125955
KGZ	0.101017	0.000174741	0.0315094	0.0450135	0.00133282
UZB	0.100263	0.000174741	0.0244059	0.0348656	0.00484388
RUS	0.100864	0.000174741	0.0230275	0.0328964	0.00772836
JAM	0.106399	0.000174741	0.026583	0.0379758	0.0104182
POL	0.11557	0.000174741	0.0181457	0.0259224	0.0305717
NOR	0.132816	0.000174741	0.0163419	0.0233456	0.0517241
PRK	0.0957563	0.000174741	0.045591	0.06513	0.012931
ARM	0.101042	0.000174741	0.0244059	0.0348656	0.00740521
BLR	0.101883	0.000174741	0.0604654	0.0863791	0.0119145
BRN	0.0973395	0.000174741	0.0176047	0.0251495	0.012931
FIN	0.128994	0.000174741	0.0171881	0.0245544	0.0276561
BGD	0.0976756	0.000174741	0.0290234	0.0414621	0.00589576
PRT	0.11765	0.000174741	0.0189168	0.0270241	0.0244325
GHA	0.0870104	0.000174741	0.0378559	0.0540799	0.00155415
UGA	0.0853648	0.000174741	0.0315094	0.0450135	0.00152585
ALB	0.137261	0.000174741	0.0244059	0.0348656	0.0120692
SWZ	0.081828	0.000174741	0.0290234	0.0414621	0.00105596
KAZ	0.100498	0.000174741	0.0197922	0.0282746	0.00777265
SLV	0.11006	0.000174741	0.0315094	0.0450135	0.011826
KOR	0.0958812	0.000174741	0.017386	0.0248371	0.0346758
SUR	0.110717	0.000174741	0.034022	0.0486028	0.004404
LAO	0.0970499	0.000174741	0.0404244	0.0577492	0.00444955
GTM	0.110568	0.000174741	0.0218528	0.0312183	0.0149777
COG	0.0859551	0.000174741	0.0378559	0.0540799	0.00805063
THA	0.0960896	0.000174741	0.0197922	0.0282746	0.0127419
NLD	0.110265	0.000174741	0.0163419	0.0233456	0.0406997
HTI	0.104605	0.000174741	0.045591	0.06513	0.00259967
URY	0.0940764	0.000174741	0.0197922	0.0282746	0.0120831
PHL	0.096247	0.000174741	0.0204913	0.0292732	0.0062276
LKA	0.0978348	0.000174741	0.045591	0.06513	0.00311245
CIV	0.0856499	0.000174741	0.0230275	0.0328964	0.00498106
KWT	0.097208	0.000174741	0.0178394	0.0254848	0.00634982
AUT	0.120323	0.000174741	0.0171881	0.0245544	0.0101689
MYS	0.0971068	0.000174741	0.0189168	0.0270241	0.0161055
ZMB	0.0840467	0.000174741	0.0378559	0.0540799	0.00267343
LBR	0.0857981	0.000174741	0.0378559	0.0540799	0.00294263
MEX	0.104856	0.000174741	0.0204913	0.0292732	0.00871685
MLI	0.0786967	0.000174741	0.0378559	0.0540799	0.00323564
BOL	0.110971	0.000174741	0.0404244	0.0577492	0.016772
SLE	0.0855458	0.000174741	0.0378559	0.0540799	0.00188125
FJI	0.0960909	0.000174741	0.026583	0.0379758	0.0159799
VNM	0.0968841	0.000174741	0.0230275	0.0328964	0.0107782
NIC	0.105975	0.000174741	0.0290234	0.0414621	0.00879156
CAN	0.096207	0.000174741	0.0163419	0.0233456	0.0367696
NGA	0.0830177	0.000174741	0.034022	0.0486028	0.00380891
BHS	0.0990774	0.000174741	0.026583	0.0379758	0.0158281
TJK	0.100787	0.000174741	0.0315094	0.0450135	0.001934
BLZ	0.110843	0.000174741	0.034022	0.0486028	0.0146309
PNG	0.0977367	0.000174741	0.0290234	0.0414621	0.00417032
ESP	0.115187	0.000174741	0.0197922	0.0282746	0.0315705
JPN	0.173071	0.000174741	0.0178394	0.0254848	0.0276561
DOM	0.106724	0.000174741	0.0244059	0.0348656	0.0128572
DZA	0.098554	0.000174741	0.0230275	0.0328964	0.0073636
TUR	0.139354	0.000174741	0.026583	0.0379758	0.0278716
IRN	0.0992718	0.000174741	0.0315094	0.0450135	0.00724517
COL	0.103043	0.000174741	0.0204913	0.0292732	0.0115363
FLK	0.101999	0.000174741	0.02445	0.0349285	0.012931
SWE	0.117643	0.000174741	0.0163419	0.0233456	0.012931
GMB	0.0816003	0.000174741	0.026583	0.0379758	0.00104328
AUS	0.0953878	0.000174741	0.0163419	0.0233456	0.0414917
HND	0.109949	0.000174741	0.026583	0.0379758	0.0144547
QAT	0.0975071	0.000174741	0.017386	0.0248371	0.00564704
CRI	0.111015	0.000174741	0.0244059	0.0348656	0.0164027
BIH	0.145678	0.000174741	0.0315094	0.0450135	0.012931
MDA	0.100693	0.000174741	0.0315094	0.0450135	0.012931
CHE	0.135824	0.000174741	0.0163419	0.0233456	0.0574323
RWA	0.085253	0.000174741	0.0290234	0.0414621	0.000111941
FRA	0.113815	0.000174741	0.0176047	0.0251495	0.0356955
PAK	0.0972223	0.000174741	0.0378559	0.0540799	0.00887642
IRL	0.115147	0.000174741	0.0176047	0.0251495	0.0344591
LUX	0.115829	0.000174741	0.0163419	0.0233456	0.0428199
LVA	0.119373	0.000174741	0.0189168	0.0270241	0.0187115
BWA	0.0802752	0.000174741	0.0189168	0.0270241	0.00551518
LBN	0.101488	0.000174741	0.0604654	0.0863791	0.00534528
MNG	0.0948528	0.000174741	0.0290234	0.0414621	0.00914633
NAM	0.0799921	0.000174741	0.026583	0.0379758	0.012931
IND	0.137867	0.000174741	0.0211555	0.0302221	0.00361932
TZA	0.0850952	0.000174741	0.026583	0.0379758	0.00355005
MAR	0.0975312	0.000174741	0.0218528	0.0312183	0.0120224
NER	0.0784064	0.000174741	0.0404244	0.0577492	0.00304648
PRY	0.0990633	0.000174741	0.0211555	0.0302221	0.0153452
OMN	0.0974777	0.000174741	0.0218528	0.0312183	0.0273475
SVN	0.129457	0.000174741	0.0189168	0.0270241	0.0313788
VEN	0.113368	0.000174741	0.0604654	0.0863791	0.012931
MKD	0.139707	0.000174741	0.0244059	0.0348656	0.012931
AZE	0.10149	0.000174741	0.0218528	0.0312183	0.012931
ZWE	0.0825299	0.000174741	0.0378559	0.0540799	0.00490042
ISR	0.0976289	0.000174741	0.0197922	0.0282746	0.0233357
CZE	0.12136	0.000174741	0.0176047	0.0251495	0.0176285
CYP	0.130765	0.000174741	0.0189168	0.0270241	0.0245746
SEN	0.0806479	0.000174741	0.026583	0.0379758	0.0043553
COD	0.0853536	0.000174741	0.0315094	0.0450135	0.0030824
GEO	0.101151	0.000174741	0.0230275	0.0328964	0.000289438
IDN	0.0961106	0.000174741	0.0204913	0.0292732	0.0148295
ROU	0.127442	0.000174741	0.0211555	0.0302221	0.0262935
GUY	0.110817	0.000174741	0.0197922	0.0282746	0.00970227
MOZ	0.0839965	0.000174741	0.0378559	0.0540799	0.00588997
NPL	0.0971726	0.000174741	0.0244059	0.0348656	0.00779151
PAN	0.110178	0.000174741	0.0211555	0.0302221	0.0146818
ISL	0.137236	0.000174741	0.0178394	0.0254848	0.0394956
CHL	0.0943007	0.000174741	0.0181457	0.0259224	0.0149437
SAU	0.0972627	0.000174741	0.0176047	0.0251495	0.0330656
YEM	0.100629	0.000174741	0.045591	0.06513	0.012931
BEL	0.113005	0.000174741	0.0176047	0.0251495	0.0396307
USA	0.117188	0.000174741	0.0163419	0.0233456	0.0195594
UKR	0.101558	0.000174741	0.045591	0.06513	0.0115168
SLB	0.0977417	0.000174741	0.034022	0.0486028	0.00345301
GBR	0.111598	0.000174741	0.0176047	0.0251495	0.0407688
SYR	0.0975978	0.000174741	0.0604654	0.0863791	0.000299786
MNE	0.138904	0.000174741	0.026583	0.0379758	0.018422
BEN	0.0846577	0.000174741	0.026583	0.0379758	0.00406032
LBY	0.0973082	0.000174741	0.0197922	0.0282746	0.00860849
BFA	0.0822706	0.000174741	0.034022	0.0486028	0.00351007
PSE	0.0980497	0.000174741	0.0604654	0.0863791	0.012931
GRC	0.124958	0.000174741	0.0218528	0.0312183	0.0247457
ARG	0.104621	0.000174741	0.045591	0.06513	0.00883646
IRQ	0.0984751	0.000174741	0.034022	0.0486028	0.011408
MDG	0.0812618	0.000174741	0.0290234	0.0414621	0.00240232
CMR	0.0853302	0.000174741	0.034022	0.0486028	0.003296
GAB	0.0861943	0.000174741	0.0378559	0.0540799	0.00823538
SDN	0.0973998	0.000174741	0.0604654	0.0863791	2.94869e-05
EGY	0.0978883	0.000174741	0.034022	0.0486028	0.0134299
AGO	0.0849525	0.000174741	0.0315094	0.0450135	0.00350024
CUB	0.109203	0.000174741	0.045591	0.06513	0.012931

## Sheet: Comp_Base24_DAC
	c_elec	c_heat	c_capex	c_om
ECU	0.0306609	0.257551	0.0988035	0.0510477
DEU	0.0325073	0.273061	0.0373256	0.138162
EST	0.0344148	0.289084	0.0412445	0.0557238
MMR	0.0286513	0.240671	0.0988035	0.0124782
MWI	0.0237057	0.199128	0.0923855	0.00896196
HRV	0.0365455	0.306982	0.0440588	0.0700809
GIN	0.0246974	0.207459	0.0923855	0.00766774
SOM	0.0227663	0.191237	0.0988035	0.04152
NZL	0.0278074	0.233582	0.0373256	0.127683
LTU	0.0337575	0.283563	0.0420451	0.081902
ZAF	0.0232231	0.195074	0.0547344	0.0309875
DNK	0.0317925	0.267057	0.0373256	0.107952
CHN	0.031014	0.260517	0.0412445	0.0271566
HUN	0.0344775	0.289611	0.0481601	0.0654602
BGR	0.0365877	0.307337	0.0463408	0.0554492
SRB	0.0395019	0.331816	0.0547344	0.0576264
ARE	0.0282294	0.237127	0.0400587	0.0628028
KEN	0.023768	0.199651	0.0827602	0.0180451
ETH	0.0244167	0.2051	0.0923855	0.049824
TUN	0.0284995	0.239395	0.0923855	0.0256484
PER	0.0317664	0.266838	0.0463408	0.0262734
ITA	0.0360258	0.302617	0.0498859	0.0597888
GRL	0.0394907	0.331722	0.0419924	0.04152
SVK	0.0360881	0.30314	0.0440588	0.0593264
KHM	0.0281179	0.236191	0.0701075	6.59504e-06
BRA	0.029842	0.250673	0.0516946	0.0279449
JOR	0.028409	0.238635	0.0582894	0.0404425
KGZ	0.029295	0.246078	0.0764166	0.00427953
UZB	0.0290762	0.24424	0.0582894	0.0155531
RUS	0.0292506	0.245705	0.0547344	0.0248148
JAM	0.0308557	0.259188	0.0638786	0.0334516
POL	0.0335153	0.281528	0.0420451	0.0981622
NOR	0.0385167	0.32354	0.0373256	0.16608
PRK	0.0277693	0.233262	0.111656	0.04152
ARM	0.0293021	0.246138	0.0582894	0.0237772
BLR	0.0295461	0.248187	0.148408	0.0382561
BRN	0.0282285	0.237119	0.0406308	0.04152
FIN	0.0374083	0.31423	0.0395408	0.0888003
BGD	0.0283259	0.237938	0.0701075	0.0189306
PRT	0.0341184	0.286595	0.0440588	0.0784498
GHA	0.025233	0.211957	0.0923855	0.0049902
UGA	0.0247558	0.207949	0.0764166	0.00489932
ALB	0.0398056	0.334367	0.0582894	0.0387526
SWZ	0.0237301	0.199333	0.0701075	0.00339055
KAZ	0.0291444	0.244813	0.0463408	0.024957
SLV	0.0319173	0.268106	0.0764166	0.0379717
KOR	0.0278056	0.233567	0.0400587	0.11134
SUR	0.032108	0.269708	0.0827602	0.0141407
LAO	0.0281445	0.236414	0.0988035	0.014287
GTM	0.0320648	0.269344	0.0516946	0.0480915
COG	0.024927	0.209387	0.0923855	0.0258496
THA	0.027866	0.234074	0.0463408	0.0409127
NLD	0.0319768	0.268605	0.0373256	0.130682
HTI	0.0303355	0.254818	0.111656	0.00834723
URY	0.0272821	0.22917	0.0463408	0.0387974
PHL	0.0279116	0.234458	0.0481601	0.0199961
LKA	0.0283721	0.238326	0.111656	0.00999369
CIV	0.0248385	0.208643	0.0547344	0.0159936
KWT	0.0281903	0.236799	0.0412445	0.0203885
AUT	0.0348938	0.293108	0.0395408	0.0326511
MYS	0.028161	0.236552	0.0440588	0.0517128
ZMB	0.0243735	0.204738	0.0923855	0.00858405
LBR	0.0248814	0.209004	0.0923855	0.00944845
MEX	0.0304081	0.255428	0.0481601	0.0279888
MLI	0.022822	0.191705	0.0923855	0.0103892
BOL	0.0321816	0.270325	0.0988035	0.053853
SLE	0.0248083	0.208389	0.0923855	0.00604046
FJI	0.0278664	0.234077	0.0638786	0.0513094
VNM	0.0280964	0.23601	0.0547344	0.0346074
NIC	0.0307329	0.258156	0.0701075	0.0282286
CAN	0.0279	0.23436	0.0373256	0.118063
NGA	0.0240751	0.202231	0.0827602	0.01223
BHS	0.0287324	0.241353	0.0638786	0.0508221
TJK	0.0292283	0.245518	0.0764166	0.00620983
BLZ	0.0321446	0.270014	0.0827602	0.0469779
PNG	0.0283436	0.238087	0.0701075	0.0133904
ESP	0.0334042	0.280595	0.0463408	0.101369
JPN	0.0501906	0.421601	0.0412445	0.0888003
DOM	0.03095	0.25998	0.0582894	0.0412831
DZA	0.0285807	0.240078	0.0547344	0.0236436
TUR	0.0404126	0.339466	0.0638786	0.0894922
IRN	0.0287888	0.241826	0.0764166	0.0232634
COL	0.0298825	0.251013	0.0481601	0.0370417
FLK	0.0295796	0.248469	0.0584029	0.04152
SWE	0.0341164	0.286578	0.0373256	0.04152
GMB	0.0236641	0.198778	0.0638786	0.00334983
AUS	0.0276625	0.232365	0.0373256	0.133225
HND	0.0318851	0.267835	0.0638786	0.0464123
QAT	0.0282771	0.237527	0.0400587	0.018132
CRI	0.0321943	0.270432	0.0582894	0.052667
BIH	0.0422468	0.354873	0.0764166	0.04152
MDA	0.029201	0.245288	0.0764166	0.04152
CHE	0.0393889	0.330867	0.0373256	0.184408
RWA	0.0247234	0.207676	0.0701075	0.00035943
FRA	0.0330065	0.277254	0.0406308	0.114614
PAK	0.0281945	0.236834	0.0923855	0.0285011
IRL	0.0333925	0.280497	0.0406308	0.110644
LUX	0.0335905	0.28216	0.0373256	0.13749
LVA	0.0346181	0.290792	0.0440588	0.0600803
BWA	0.0232798	0.19555	0.0440588	0.0177086
LBN	0.0294316	0.247225	0.148408	0.017163
MNG	0.0275073	0.231061	0.0701075	0.0293678
NAM	0.0231977	0.194861	0.0638786	0.04152
IND	0.0399815	0.335844	0.0498859	0.0116212
TZA	0.0246776	0.207292	0.0638786	0.0113988
MAR	0.0282841	0.237586	0.0516946	0.0386026
NER	0.0227379	0.190998	0.0988035	0.0097819
PRY	0.0287284	0.241318	0.0498859	0.0492717
OMN	0.0282685	0.237456	0.0516946	0.0878094
SVN	0.0375424	0.315356	0.0440588	0.100754
VEN	0.0328768	0.276165	0.148408	0.04152
MKD	0.040515	0.340326	0.0582894	0.04152
AZE	0.0294322	0.247231	0.0516946	0.04152
ZWE	0.0239337	0.201043	0.0923855	0.0157347
ISR	0.0283124	0.237824	0.0463408	0.0749281
CZE	0.0351945	0.295633	0.0406308	0.056603
CYP	0.037922	0.318545	0.0440588	0.0789062
SEN	0.0233879	0.196458	0.0638786	0.0139843
COD	0.0247525	0.207921	0.0764166	0.00989721
GEO	0.0293338	0.246404	0.0547344	0.000929351
IDN	0.0278721	0.234125	0.0481601	0.0476156
ROU	0.0369582	0.310449	0.0498859	0.0844252
GUY	0.0321369	0.26995	0.0463408	0.0311528
MOZ	0.024359	0.204615	0.0923855	0.018912
NPL	0.02818	0.236712	0.0582894	0.0250176
PAN	0.0319516	0.268393	0.0498859	0.0471415
ISL	0.0397985	0.334308	0.0412445	0.126816
CHL	0.0273472	0.229716	0.0420451	0.0479823
SAU	0.0282062	0.236932	0.0406308	0.10617
YEM	0.0291823	0.245132	0.111656	0.04152
BEL	0.0327714	0.27528	0.0406308	0.127249
USA	0.0339844	0.285469	0.0373256	0.0628028
UKR	0.0294519	0.247396	0.111656	0.0369792
SLB	0.0283451	0.238099	0.0827602	0.0110872
GBR	0.0323634	0.271853	0.0406308	0.130904
SYR	0.0283034	0.237748	0.148408	0.000962576
MNE	0.0402821	0.338369	0.0638786	0.0591507
BEN	0.0245507	0.206226	0.0638786	0.0130372
LBY	0.0282194	0.237043	0.0463408	0.0276408
BFA	0.0238585	0.200411	0.0827602	0.0112704
PSE	0.0284344	0.238849	0.148408	0.04152
GRC	0.0362377	0.304397	0.0516946	0.0794553
ARG	0.03034	0.254856	0.111656	0.0283728
IRQ	0.0285578	0.239885	0.0827602	0.0366298
MDG	0.0235659	0.197954	0.0701075	0.00771355
CMR	0.0247458	0.207864	0.0827602	0.010583
GAB	0.0249963	0.209969	0.0923855	0.0264428
SDN	0.028246	0.237266	0.148408	9.46788e-05
EGY	0.0283876	0.238456	0.0827602	0.0431217
AGO	0.0246362	0.206944	0.0764166	0.0112389
CUB	0.031669	0.266019	0.111656	0.04152

## Sheet: Comp_Base24_AD
	c_elec	c_heat	c_bio	c_capex	c_om
ECU	0.00634363	0.0126873	0.0224062	0.0612373	0.0158984
DEU	0.00672565	0.0134513	0.0559063	0.0243131	0.0430292
EST	0.0071203	0.0142406	0.0529576	0.0266209	0.0173547
MMR	0.00592786	0.0118557	0.0397241	0.0612373	0.00388622
MWI	0.00490464	0.00980927	0.025345	0.0573191	0.00279112
HRV	0.00756114	0.0151223	0.0529576	0.028281	0.0218261
GIN	0.00510982	0.0102196	0.025345	0.0573191	0.00238805
SOM	0.00471026	0.00942052	0.025345	0.0612373	0.012931
NZL	0.00575325	0.0115065	0.0397241	0.0243131	0.0397658
LTU	0.00698431	0.0139686	0.0420068	0.0270929	0.0255077
ZAF	0.00480479	0.00960957	0.025345	0.0346082	0.00965078
DNK	0.00657775	0.0131555	0.0730098	0.0243131	0.0336207
CHN	0.00641668	0.0128334	0.0188962	0.0266209	0.00845769
HUN	0.00713328	0.0142666	0.0414391	0.0307058	0.020387
BGR	0.00756988	0.0151398	0.0529576	0.0296294	0.0172692
SRB	0.00817282	0.0163456	0.0397241	0.0346082	0.0179472
ARE	0.00584056	0.0116811	0.0397241	0.0259222	0.0195594
KEN	0.00491752	0.00983504	0.0539385	0.0514632	0.00562
ETH	0.00505173	0.0101035	0.025345	0.0573191	0.0155172
TUN	0.00589644	0.0117929	0.025345	0.0573191	0.00798797
PER	0.00657235	0.0131447	0.0224062	0.0296294	0.0081826
ITA	0.00745362	0.0149072	0.0419612	0.0317283	0.0186207
GRL	0.00817049	0.016341	0.0397241	0.0270618	0.012931
SVK	0.0074665	0.014933	0.0529576	0.028281	0.0184767
KHM	0.0058175	0.011635	0.0397241	0.0438127	2.05397e-06
BRA	0.00617421	0.0123484	0.0219114	0.0328013	0.0087032
JOR	0.00587772	0.0117554	0.0397241	0.0367269	0.0125955
KGZ	0.00606103	0.0121221	0.0397241	0.04762	0.00133282
UZB	0.00601577	0.0120315	0.0397241	0.0367269	0.00484388
RUS	0.00605186	0.0121037	0.0405992	0.0346082	0.00772836
JAM	0.00638394	0.0127679	0.0397241	0.0400701	0.0104182
POL	0.00693419	0.0138684	0.042741	0.0270929	0.0305717
NOR	0.00796897	0.0159379	0.0354306	0.0243131	0.0517241
PRK	0.00574538	0.0114908	0.0397241	0.069109	0.012931
ARM	0.00606251	0.012125	0.0397241	0.0367269	0.00740521
BLR	0.00611298	0.012226	0.0397241	0.0917252	0.0119145
BRN	0.00584037	0.0116807	0.0397241	0.0262592	0.012931
FIN	0.00773966	0.0154793	0.0491853	0.0256172	0.0276561
BGD	0.00586054	0.0117211	0.0397241	0.0438127	0.00589576
PRT	0.00705899	0.014118	0.0529576	0.028281	0.0244325
GHA	0.00522062	0.0104412	0.0312522	0.0573191	0.00155415
UGA	0.00512189	0.0102438	0.0136397	0.04762	0.00152585
ALB	0.00823565	0.0164713	0.0397241	0.0367269	0.0120692
SWZ	0.00490968	0.00981935	0.025345	0.0438127	0.00105596
KAZ	0.00602989	0.0120598	0.0397241	0.0296294	0.00777265
SLV	0.00660359	0.0132072	0.0397241	0.04762	0.011826
KOR	0.00575287	0.0115057	0.0320457	0.0259222	0.0346758
SUR	0.00664304	0.0132861	0.0224062	0.0514632	0.004404
LAO	0.00582299	0.011646	0.0397241	0.0612373	0.00444955
GTM	0.00663409	0.0132682	0.0397241	0.0328013	0.0149777
COG	0.0051573	0.0103146	0.025345	0.0573191	0.00805063
THA	0.00576537	0.0115307	0.0170647	0.0296294	0.0127419
NLD	0.0066159	0.0132318	0.0488861	0.0243131	0.0406997
HTI	0.00627632	0.0125526	0.0397241	0.069109	0.00259967
URY	0.00564458	0.0112892	0.0224062	0.0296294	0.0120831
PHL	0.00577482	0.0115496	0.0320457	0.0307058	0.0062276
LKA	0.00587009	0.0117402	0.0397241	0.069109	0.00311245
CIV	0.005139	0.010278	0.025345	0.0346082	0.00498106
KWT	0.00583248	0.011665	0.0397241	0.0266209	0.00634982
AUT	0.0072194	0.0144388	0.06239	0.0256172	0.0101689
MYS	0.00582641	0.0116528	0.0125965	0.028281	0.0161055
ZMB	0.0050428	0.0100856	0.025345	0.0573191	0.00267343
LBR	0.00514788	0.0102958	0.025345	0.0573191	0.00294263
MEX	0.00629134	0.0125827	0.0191395	0.0307058	0.00871685
MLI	0.0047218	0.0094436	0.0264476	0.0573191	0.00323564
BOL	0.00665826	0.0133165	0.0224062	0.0612373	0.016772
SLE	0.00513275	0.0102655	0.025345	0.0573191	0.00188125
FJI	0.00576545	0.0115309	0.0397241	0.0400701	0.0159799
VNM	0.00581305	0.0116261	0.0320457	0.0346082	0.0107782
NIC	0.00635852	0.012717	0.0167442	0.0438127	0.00879156
CAN	0.00577242	0.0115448	0.0492464	0.0243131	0.0367696
NGA	0.00498106	0.00996213	0.025345	0.0514632	0.00380891
BHS	0.00594464	0.0118893	0.0397241	0.0400701	0.0158281
TJK	0.00604723	0.0120945	0.0397241	0.04762	0.001934
BLZ	0.0066506	0.0133012	0.0397241	0.0514632	0.0146309
PNG	0.0058642	0.0117284	0.0397241	0.0438127	0.00417032
ESP	0.00691121	0.0138224	0.0634182	0.0296294	0.0315705
JPN	0.0103843	0.0207685	0.0860359	0.0266209	0.0276561
DOM	0.00640345	0.0128069	0.0397241	0.0367269	0.0128572
DZA	0.00591324	0.0118265	0.025345	0.0346082	0.0073636
TUR	0.00836122	0.0167224	0.0397241	0.0400701	0.0278716
IRN	0.00595631	0.0119126	0.0397241	0.04762	0.00724517
COL	0.0061826	0.0123652	0.0224062	0.0307058	0.0115363
FLK	0.00611993	0.0122399	0.0397241	0.0367947	0.012931
SWE	0.00705856	0.0141171	0.0454882	0.0243131	0.012931
GMB	0.00489602	0.00979203	0.025345	0.0400701	0.00104328
AUS	0.00572327	0.0114465	0.0397241	0.0243131	0.0414917
HND	0.00659692	0.0131938	0.0397241	0.0400701	0.0144547
QAT	0.00585043	0.0117009	0.0397241	0.0259222	0.00564704
CRI	0.0066609	0.0133218	0.0397241	0.0367269	0.0164027
BIH	0.00874071	0.0174814	0.0397241	0.04762	0.012931
MDA	0.00604158	0.0120832	0.0397241	0.04762	0.012931
CHE	0.00814943	0.0162989	0.0397241	0.0243131	0.0574323
RWA	0.00511518	0.0102304	0.025345	0.0438127	0.000111941
FRA	0.00682893	0.0136579	0.0709416	0.0262592	0.0356955
PAK	0.00583334	0.0116667	0.0397241	0.0573191	0.00887642
IRL	0.0069088	0.0138176	0.0606142	0.0262592	0.0344591
LUX	0.00694977	0.0138995	0.0529576	0.0243131	0.0428199
LVA	0.00716236	0.0143247	0.0529576	0.028281	0.0187115
BWA	0.00481651	0.00963303	0.025345	0.028281	0.00551518
LBN	0.00608929	0.0121786	0.0397241	0.0917252	0.00534528
MNG	0.00569117	0.0113823	0.0397241	0.0438127	0.00914633
NAM	0.00479952	0.00959905	0.0226143	0.0400701	0.012931
IND	0.00827203	0.0165441	0.025635	0.0317283	0.00361932
TZA	0.00510571	0.0102114	0.025345	0.0400701	0.00355005
MAR	0.00585187	0.0117037	0.025345	0.0328013	0.0120224
NER	0.00470439	0.00940877	0.025345	0.0612373	0.00304648
PRY	0.0059438	0.0118876	0.0224062	0.0317283	0.0153452
OMN	0.00584866	0.0116973	0.0397241	0.0328013	0.0273475
SVN	0.0077674	0.0155348	0.0529576	0.028281	0.0313788
VEN	0.0068021	0.0136042	0.0224062	0.0917252	0.012931
MKD	0.00838242	0.0167648	0.0397241	0.0367269	0.012931
AZE	0.00608942	0.0121788	0.0397241	0.0328013	0.012931
ZWE	0.0049518	0.00990359	0.025345	0.0573191	0.00490042
ISR	0.00585773	0.0117155	0.0397241	0.0296294	0.0233357
CZE	0.00728161	0.0145632	0.0345143	0.0262592	0.0176285
CYP	0.00784593	0.0156919	0.0529576	0.028281	0.0245746
SEN	0.00483887	0.00967775	0.0120053	0.0400701	0.0043553
COD	0.00512121	0.0102424	0.0397241	0.04762	0.0030824
GEO	0.00606907	0.0121381	0.0397241	0.0346082	0.000289438
IDN	0.00576664	0.0115333	0.0320457	0.0307058	0.0148295
ROU	0.00764652	0.015293	0.0529576	0.0317283	0.0262935
GUY	0.00664901	0.013298	0.0224062	0.0296294	0.00970227
MOZ	0.00503979	0.0100796	0.020998	0.0573191	0.00588997
NPL	0.00583035	0.0116607	0.0397241	0.0367269	0.00779151
PAN	0.00661067	0.0132213	0.0397241	0.0317283	0.0146818
ISL	0.00823418	0.0164684	0.0397241	0.0266209	0.0394956
CHL	0.00565804	0.0113161	0.0228733	0.0270929	0.0149437
SAU	0.00583576	0.0116715	0.0397241	0.0262592	0.0330656
YEM	0.00603773	0.0120755	0.0397241	0.069109	0.012931
BEL	0.00678029	0.0135606	0.0529576	0.0262592	0.0396307
USA	0.00703126	0.0140625	0.0465976	0.0243131	0.0195594
UKR	0.00609351	0.012187	0.048402	0.069109	0.0115168
SLB	0.0058645	0.011729	0.0397241	0.0514632	0.00345301
GBR	0.00669589	0.0133918	0.0653966	0.0262592	0.0407688
SYR	0.00585587	0.0117117	0.0397241	0.0917252	0.000299786
MNE	0.00833422	0.0166684	0.0397241	0.0400701	0.018422
BEN	0.00507946	0.0101589	0.025345	0.0400701	0.00406032
LBY	0.00583849	0.011677	0.025345	0.0296294	0.00860849
BFA	0.00493623	0.00987247	0.025345	0.0514632	0.00351007
PSE	0.00588298	0.011766	0.0397241	0.0917252	0.012931
GRC	0.00749746	0.0149949	0.0494236	0.0328013	0.0247457
ARG	0.00627724	0.0125545	0.0224339	0.069109	0.00883646
IRQ	0.00590851	0.011817	0.0397241	0.0514632	0.011408
MDG	0.00487571	0.00975142	0.025345	0.0438127	0.00240232
CMR	0.00511981	0.0102396	0.025345	0.0514632	0.003296
GAB	0.00517166	0.0103433	0.0325657	0.0573191	0.00823538
SDN	0.00584399	0.011688	0.025345	0.0917252	2.94869e-05
EGY	0.0058733	0.0117466	0.0173774	0.0514632	0.0134299
AGO	0.00509715	0.0101943	0.025345	0.04762	0.00350024
CUB	0.0065522	0.0131044	0.0397241	0.069109	0.012931

[truncated: 190 more sheets: Comp_Base24_AE, Comp_Base24_ATR_CCS, Comp_Base24_B_PYR_kero, Comp_Base24_CLR, Comp_Base24_CuCl, Comp_Base24_HB, Comp_Base24_HTL, Comp_Base24_HTSE, Comp_Base24_HVO_diesel, Comp_Base24_HVO_kerose, Comp_Base24_M_PYR, Comp_Base24_PTM, Comp_Base24_RWGS_FT_di, Comp_Base24_RWGS_FT_ke, Comp_Base24_RWGS_MeOH_, Comp_Base24_SMR_CCS, Comp_Base24_SOEC, Comp_Base24_SR_FT_dies, Comp_Base24_SR_FT_kero, Comp_Base24_ST_FT_dies …]
