# Supplementary material for: Global cost drivers and regional trade-offs for low-carbon fuels: a prospective techno-economic assessment
Source: Royal Society of Chemistry journal article supplement (doi:10.1039/d5ee05591a), 2026-01-01
Supplement: d5ee05591a2.zip [file Maritime_Routes_Segments.xlsx]

## Sheet: Sheet1
origin_country	carrier	year	total_cost	capital_to_port_distance	capital_to_port_mode	capital_to_port_cost	sea_distance	sea_cost	port_to_capital_distance	port_to_capital_mode	port_to_capital_cost
ABW	LH2	2024	5.60005	0	none	0	7685.42	0.755477	580.565	barge	0.319311
ABW	LH2	2050	3.25822	0	none	0	7685.42	0.576406	580.565	barge	0.243837
ABW	LOHC	2024	3.90423	0	none	0	7685.42	0.230563	580.565	barge	0.0975349
ABW	LOHC	2050	3.58179	0	none	0	7685.42	0.230563	580.565	barge	0.0975349
ABW	MeOH	2024	3.91687	0	none	0	7685.42	0.307417	580.565	barge	0.130047
ABW	MeOH	2050	2.44973	0	none	0	7685.42	0.307417	580.565	barge	0.130047
ABW	NH3	2024	3.35661	0	none	0	7685.42	0.272064	580.565	barge	0.123312
ABW	NH3	2050	2.84061	0	none	0	7685.42	0.272064	580.565	barge	0.123312
AFG	LH2	2024	6.49454	1471.3	rail	0.73565	7725.39	0.759406	580.565	barge	0.319311
AFG	LH2	2050	3.75361	1471.3	rail	0.44139	7725.39	0.579404	580.565	barge	0.243837
AFG	LOHC	2024	4.05007	1471.3	rail	0.141245	7725.39	0.231762	580.565	barge	0.0975349
AFG	LOHC	2050	3.7265	1471.3	rail	0.141245	7725.39	0.231762	580.565	barge	0.0975349
AFG	MeOH	2024	4.10831	1471.3	rail	0.188326	7725.39	0.309016	580.565	barge	0.130047
AFG	MeOH	2050	2.64117	1471.3	rail	0.188326	7725.39	0.309016	580.565	barge	0.130047
AFG	NH3	2024	3.54589	1471.3	rail	0.182294	7725.39	0.273479	580.565	barge	0.123312
AFG	NH3	2050	3.02989	1471.3	rail	0.182294	7725.39	0.273479	580.565	barge	0.123312
AGO	LH2	2024	6.52178	1184.17	rail	0.592085	8722.58	0.85743	580.565	barge	0.319311
AGO	LH2	2050	3.76623	1184.17	rail	0.355251	8722.58	0.654193	580.565	barge	0.243837
AGO	LOHC	2024	4.05402	1184.17	rail	0.11368	8722.58	0.261677	580.565	barge	0.0975349
AGO	LOHC	2050	3.72992	1184.17	rail	0.11368	8722.58	0.261677	580.565	barge	0.0975349
AGO	MeOH	2024	4.11215	1184.17	rail	0.151574	8722.58	0.348903	580.565	barge	0.130047
AGO	MeOH	2050	2.64501	1184.17	rail	0.151574	8722.58	0.348903	580.565	barge	0.130047
AGO	NH3	2024	3.54823	1184.17	rail	0.146719	8722.58	0.308779	580.565	barge	0.123312
AGO	NH3	2050	3.03223	1184.17	rail	0.146719	8722.58	0.308779	580.565	barge	0.123312
AIA	LH2	2024	5.41926	0	none	0	6785.08	0.666973	580.565	barge	0.319311
AIA	LH2	2050	3.16031	0	none	0	6785.08	0.508881	580.565	barge	0.243837
AIA	LOHC	2024	3.87519	0	none	0	6785.08	0.203552	580.565	barge	0.0975349
AIA	LOHC	2050	3.55343	0	none	0	6785.08	0.203552	580.565	barge	0.0975349
AIA	MeOH	2024	3.87996	0	none	0	6785.08	0.271403	580.565	barge	0.130047
AIA	MeOH	2050	2.41282	0	none	0	6785.08	0.271403	580.565	barge	0.130047
AIA	NH3	2024	3.32141	0	none	0	6785.08	0.240192	580.565	barge	0.123312
AIA	NH3	2050	2.80541	0	none	0	6785.08	0.240192	580.565	barge	0.123312
ALB	LH2	2024	4.51181	247.952	truck	0.148771	1398.43	0.137466	580.565	barge	0.319311
ALB	LH2	2050	2.73165	247.952	truck	0.148771	1398.43	0.104882	580.565	barge	0.243837
ALB	LOHC	2024	3.89543	247.952	truck	0.193403	1398.43	0.0419529	580.565	barge	0.0975349
ALB	LOHC	2050	3.57752	247.952	truck	0.193403	1398.43	0.0419529	580.565	barge	0.0975349
ALB	MeOH	2024	3.91722	247.952	truck	0.25787	1398.43	0.0559372	580.565	barge	0.130047
ALB	MeOH	2050	2.45008	247.952	truck	0.25787	1398.43	0.0559372	580.565	barge	0.130047
ALB	NH3	2024	3.36047	247.952	truck	0.248696	1398.43	0.0495044	580.565	barge	0.123312
ALB	NH3	2050	2.84447	247.952	truck	0.248696	1398.43	0.0495044	580.565	barge	0.123312
ANT	LH2	2024	5.4176	0	none	0	6776.8	0.666159	580.565	barge	0.319311
ANT	LH2	2050	3.15941	0	none	0	6776.8	0.50826	580.565	barge	0.243837
ANT	LOHC	2024	3.87492	0	none	0	6776.8	0.203304	580.565	barge	0.0975349
ANT	LOHC	2050	3.55317	0	none	0	6776.8	0.203304	580.565	barge	0.0975349
ANT	MeOH	2024	3.87962	0	none	0	6776.8	0.271072	580.565	barge	0.130047
ANT	MeOH	2050	2.41248	0	none	0	6776.8	0.271072	580.565	barge	0.130047
ANT	NH3	2024	3.32109	0	none	0	6776.8	0.239899	580.565	barge	0.123312
ANT	NH3	2050	2.80509	0	none	0	6776.8	0.239899	580.565	barge	0.123312
ARE	LH2	2024	5.74088	229.463	truck	0.137678	7583.96	0.745503	580.565	barge	0.319311
ARE	LH2	2050	3.39261	229.463	truck	0.137678	7583.96	0.568797	580.565	barge	0.243837
ARE	LOHC	2024	4.08045	229.463	truck	0.178981	7583.96	0.227519	580.565	barge	0.0975349
ARE	LOHC	2050	3.75792	229.463	truck	0.178981	7583.96	0.227519	580.565	barge	0.0975349
ARE	MeOH	2024	4.15158	229.463	truck	0.238642	7583.96	0.303358	580.565	barge	0.130047
ARE	MeOH	2050	2.68444	229.463	truck	0.238642	7583.96	0.303358	580.565	barge	0.130047
ARE	NH3	2024	3.58364	229.463	truck	0.230151	7583.96	0.268472	580.565	barge	0.123312
ARE	NH3	2050	3.06764	229.463	truck	0.230151	7583.96	0.268472	580.565	barge	0.123312
ARG	LH2	2024	7.75399	1738.22	rail	0.86911	13196.7	1.29724	580.565	barge	0.319311
ARG	LH2	2050	4.4377	1738.22	rail	0.521466	13196.7	0.989752	580.565	barge	0.243837
ARG	LOHC	2024	4.25274	1738.22	rail	0.166869	13196.7	0.395901	580.565	barge	0.0975349
ARG	LOHC	2050	3.92487	1738.22	rail	0.166869	13196.7	0.395901	580.565	barge	0.0975349
ARG	MeOH	2024	4.36707	1738.22	rail	0.222492	13196.7	0.527868	580.565	barge	0.130047
ARG	MeOH	2050	2.89992	1738.22	rail	0.222492	13196.7	0.527868	580.565	barge	0.130047
ARG	NH3	2024	3.7938	1738.22	rail	0.215365	13196.7	0.467163	580.565	barge	0.123312
ARG	NH3	2050	3.2778	1738.22	rail	0.215365	13196.7	0.467163	580.565	barge	0.123312
ARM	LH2	2024	5.34041	818.374	truck	0.491024	3529.3	0.34693	580.565	barge	0.319311
ARM	LH2	2050	3.32489	818.374	truck	0.491024	3529.3	0.264697	580.565	barge	0.243837
ARM	LOHC	2024	4.41036	818.374	truck	0.638332	3529.3	0.105879	580.565	barge	0.0975349
ARM	LOHC	2050	4.09043	818.374	truck	0.638332	3529.3	0.105879	580.565	barge	0.0975349
ARM	MeOH	2024	4.5984	818.374	truck	0.851109	3529.3	0.141172	580.565	barge	0.130047
ARM	MeOH	2050	3.13126	818.374	truck	0.851109	3529.3	0.141172	580.565	barge	0.130047
ARM	NH3	2024	4.018	818.374	truck	0.820829	3529.3	0.124937	580.565	barge	0.123312
ARM	NH3	2050	3.502	818.374	truck	0.820829	3529.3	0.124937	580.565	barge	0.123312
ASM	LH2	2024	7.88648	0	none	0	19072	1.87478	580.565	barge	0.319311
ASM	LH2	2050	4.49651	0	none	0	19072	1.4304	580.565	barge	0.243837
ASM	LOHC	2024	4.27144	0	none	0	19072	0.57216	580.565	barge	0.0975349
ASM	LOHC	2050	3.94047	0	none	0	19072	0.57216	580.565	barge	0.0975349
ASM	MeOH	2024	4.38372	0	none	0	19072	0.76288	580.565	barge	0.130047
ASM	MeOH	2050	2.91658	0	none	0	19072	0.76288	580.565	barge	0.130047
ASM	NH3	2024	3.80168	0	none	0	19072	0.675149	580.565	barge	0.123312
ASM	NH3	2050	3.28568	0	none	0	19072	0.675149	580.565	barge	0.123312
ATG	LH2	2024	5.39976	0	none	0	6687.95	0.657425	580.565	barge	0.319311
ATG	LH2	2050	3.14975	0	none	0	6687.95	0.501596	580.565	barge	0.243837
ATG	LOHC	2024	3.87206	0	none	0	6687.95	0.200638	580.565	barge	0.0975349
ATG	LOHC	2050	3.55037	0	none	0	6687.95	0.200638	580.565	barge	0.0975349
ATG	MeOH	2024	3.87598	0	none	0	6687.95	0.267518	580.565	barge	0.130047
ATG	MeOH	2050	2.40883	0	none	0	6687.95	0.267518	580.565	barge	0.130047
ATG	NH3	2024	3.31762	0	none	0	6687.95	0.236753	580.565	barge	0.123312
ATG	NH3	2050	2.80162	0	none	0	6687.95	0.236753	580.565	barge	0.123312
AUS	LH2	2024	7.88937	637.649	truck	0.382589	16855.6	1.65691	580.565	barge	0.319311
AUS	LH2	2050	4.65959	637.649	truck	0.382589	16855.6	1.26417	580.565	barge	0.243837
AUS	LOHC	2024	4.69876	637.649	truck	0.497366	16855.6	0.505668	580.565	barge	0.0975349
AUS	LOHC	2050	4.36897	637.649	truck	0.497366	16855.6	0.505668	580.565	barge	0.0975349
AUS	MeOH	2024	4.95664	637.649	truck	0.663155	16855.6	0.674224	580.565	barge	0.130047
AUS	MeOH	2050	3.4895	637.649	truck	0.663155	16855.6	0.674224	580.565	barge	0.130047
AUS	NH3	2024	4.35696	637.649	truck	0.639562	16855.6	0.596688	580.565	barge	0.123312
AUS	NH3	2050	3.84096	637.649	truck	0.639562	16855.6	0.596688	580.565	barge	0.123312
AZE	LH2	2024	5.48673	1197.06	rail	0.59853	3529.3	0.34693	580.565	barge	0.319311
AZE	LH2	2050	3.20576	1197.06	rail	0.359118	3529.3	0.264697	580.565	barge	0.243837
AZE	LOHC	2024	3.8878	1197.06	rail	0.114918	3529.3	0.105879	580.565	barge	0.0975349
AZE	LOHC	2050	3.56759	1197.06	rail	0.114918	3529.3	0.105879	580.565	barge	0.0975349
AZE	MeOH	2024	3.90089	1197.06	rail	0.153224	3529.3	0.141172	580.565	barge	0.130047
AZE	MeOH	2050	2.43375	1197.06	rail	0.153224	3529.3	0.141172	580.565	barge	0.130047
AZE	NH3	2024	3.34688	1197.06	rail	0.148316	3529.3	0.124937	580.565	barge	0.123312
AZE	NH3	2050	2.83088	1197.06	rail	0.148316	3529.3	0.124937	580.565	barge	0.123312
BDI	LH2	2024	6.4951	1365.32	rail	0.68266	8046.18	0.790939	580.565	barge	0.319311
BDI	LH2	2050	3.75313	1365.32	rail	0.409596	8046.18	0.603463	580.565	barge	0.243837
BDI	LOHC	2024	4.05	1365.32	rail	0.131071	8046.18	0.241385	580.565	barge	0.0975349
BDI	LOHC	2050	3.72627	1365.32	rail	0.131071	8046.18	0.241385	580.565	barge	0.0975349
BDI	MeOH	2024	4.10779	1365.32	rail	0.174761	8046.18	0.321847	580.565	barge	0.130047
BDI	MeOH	2050	2.64065	1365.32	rail	0.174761	8046.18	0.321847	580.565	barge	0.130047
BDI	NH3	2024	3.54491	1365.32	rail	0.169163	8046.18	0.284835	580.565	barge	0.123312
BDI	NH3	2050	3.02891	1365.32	rail	0.169163	8046.18	0.284835	580.565	barge	0.123312
BEL	LH2	2024	4.85489	131.64	truck	0.078984	3513.9	0.345416	580.565	barge	0.319311
BEL	LH2	2050	2.88799	131.64	truck	0.078984	3513.9	0.263543	580.565	barge	0.243837
BEL	LOHC	2024	3.87267	131.64	truck	0.102679	3513.9	0.105417	580.565	barge	0.0975349
BEL	LOHC	2050	3.55326	131.64	truck	0.102679	3513.9	0.105417	580.565	barge	0.0975349
BEL	MeOH	2024	3.88288	131.64	truck	0.136906	3513.9	0.140556	580.565	barge	0.130047
BEL	MeOH	2050	2.41573	131.64	truck	0.136906	3513.9	0.140556	580.565	barge	0.130047
BEL	NH3	2024	3.32607	131.64	truck	0.132035	3513.9	0.124392	580.565	barge	0.123312
BEL	NH3	2050	2.81007	131.64	truck	0.132035	3513.9	0.124392	580.565	barge	0.123312
BEN	LH2	2024	5.46516	80.1127	truck	0.0480676	6733.38	0.661891	580.565	barge	0.319311
BEN	LH2	2050	3.20546	80.1127	truck	0.0480676	6733.38	0.505003	580.565	barge	0.243837
BEN	LOHC	2024	3.93619	80.1127	truck	0.0624879	6733.38	0.202001	580.565	barge	0.0975349
BEN	LOHC	2050	3.61441	80.1127	truck	0.0624879	6733.38	0.202001	580.565	barge	0.0975349
BEN	MeOH	2024	3.96124	80.1127	truck	0.0833172	6733.38	0.269335	580.565	barge	0.130047
BEN	MeOH	2050	2.49409	80.1127	truck	0.0833172	6733.38	0.269335	580.565	barge	0.130047
BEN	NH3	2024	3.40004	80.1127	truck	0.080353	6733.38	0.238362	580.565	barge	0.123312
BEN	NH3	2050	2.88404	80.1127	truck	0.080353	6733.38	0.238362	580.565	barge	0.123312
BFA	LH2	2024	6.07436	971.421	truck	0.582853	6648.98	0.653595	580.565	barge	0.319311
BFA	LH2	2050	3.76115	971.421	truck	0.582853	6648.98	0.498673	580.565	barge	0.243837
BFA	LOHC	2024	4.63069	971.421	truck	0.757708	6648.98	0.199469	580.565	barge	0.0975349
BFA	LOHC	2050	4.30831	971.421	truck	0.757708	6648.98	0.199469	580.565	barge	0.0975349
BFA	MeOH	2024	4.88563	971.421	truck	1.01028	6648.98	0.265959	580.565	barge	0.130047
BFA	MeOH	2050	3.41848	971.421	truck	1.01028	6648.98	0.265959	580.565	barge	0.130047
BFA	NH3	2024	4.29401	971.421	truck	0.974335	6648.98	0.235374	580.565	barge	0.123312
BFA	NH3	2050	3.77801	971.421	truck	0.974335	6648.98	0.235374	580.565	barge	0.123312
BGD	LH2	2024	6.88758	995.978	truck	0.597587	10613	1.04326	580.565	barge	0.319311
BGD	LH2	2050	4.2078	995.978	truck	0.597587	10613	0.795975	580.565	barge	0.243837
BGD	LOHC	2024	4.77774	995.978	truck	0.776863	10613	0.31839	580.565	barge	0.0975349
BGD	LOHC	2050	4.45237	995.978	truck	0.776863	10613	0.31839	580.565	barge	0.0975349
BGD	MeOH	2024	5.07372	995.978	truck	1.03582	10613	0.42452	580.565	barge	0.130047
BGD	MeOH	2050	3.60657	995.978	truck	1.03582	10613	0.42452	580.565	barge	0.130047
BGD	NH3	2024	4.47368	995.978	truck	0.998966	10613	0.3757	580.565	barge	0.123312
BGD	NH3	2050	3.95768	995.978	truck	0.998966	10613	0.3757	580.565	barge	0.123312
BGR	LH2	2024	4.89222	451.146	truck	0.270688	2582.01	0.253812	580.565	barge	0.319311
BGR	LH2	2050	2.98914	451.146	truck	0.270688	2582.01	0.193651	580.565	barge	0.243837
BGR	LOHC	2024	4.09255	451.146	truck	0.351894	2582.01	0.0774603	580.565	barge	0.0975349
BGR	LOHC	2050	3.7736	451.146	truck	0.351894	2582.01	0.0774603	580.565	barge	0.0975349
BGR	MeOH	2024	4.17728	451.146	truck	0.469192	2582.01	0.10328	580.565	barge	0.130047
BGR	MeOH	2050	2.71013	451.146	truck	0.469192	2582.01	0.10328	580.565	barge	0.130047
BGR	NH3	2024	3.61129	451.146	truck	0.452499	2582.01	0.0914032	580.565	barge	0.123312
BGR	NH3	2050	3.09529	451.146	truck	0.452499	2582.01	0.0914032	580.565	barge	0.123312
BHR	LH2	2024	5.67255	0	none	0	8046.48	0.790969	580.565	barge	0.319311
BHR	LH2	2050	3.29749	0	none	0	8046.48	0.603486	580.565	barge	0.243837
BHR	LOHC	2024	3.91587	0	none	0	8046.48	0.241394	580.565	barge	0.0975349
BHR	LOHC	2050	3.59316	0	none	0	8046.48	0.241394	580.565	barge	0.0975349
BHR	MeOH	2024	3.93168	0	none	0	8046.48	0.321859	580.565	barge	0.130047
BHR	MeOH	2050	2.46453	0	none	0	8046.48	0.321859	580.565	barge	0.130047
BHR	NH3	2024	3.37072	0	none	0	8046.48	0.284845	580.565	barge	0.123312
BHR	NH3	2050	2.85472	0	none	0	8046.48	0.284845	580.565	barge	0.123312
BHS	LH2	2024	5.63528	0	none	0	7860.86	0.772723	580.565	barge	0.319311
BHS	LH2	2050	3.2773	0	none	0	7860.86	0.589564	580.565	barge	0.243837
BHS	LOHC	2024	3.90988	0	none	0	7860.86	0.235826	580.565	barge	0.0975349
BHS	LOHC	2050	3.58732	0	none	0	7860.86	0.235826	580.565	barge	0.0975349
BHS	MeOH	2024	3.92407	0	none	0	7860.86	0.314434	580.565	barge	0.130047
BHS	MeOH	2050	2.45692	0	none	0	7860.86	0.314434	580.565	barge	0.130047
BHS	NH3	2024	3.36346	0	none	0	7860.86	0.278274	580.565	barge	0.123312
BHS	NH3	2050	2.84746	0	none	0	7860.86	0.278274	580.565	barge	0.123312
BIH	LH2	2024	4.52491	196.777	truck	0.118066	1642.7	0.161477	580.565	barge	0.319311
BIH	LH2	2050	2.72578	196.777	truck	0.118066	1642.7	0.123203	580.565	barge	0.243837
BIH	LOHC	2024	3.86328	196.777	truck	0.153486	1642.7	0.049281	580.565	barge	0.0975349
BIH	LOHC	2050	3.54523	196.777	truck	0.153486	1642.7	0.049281	580.565	barge	0.0975349
BIH	MeOH	2024	3.87397	196.777	truck	0.204648	1642.7	0.065708	580.565	barge	0.130047
BIH	MeOH	2050	2.40682	196.777	truck	0.204648	1642.7	0.065708	580.565	barge	0.130047
BIH	NH3	2024	3.3185	196.777	truck	0.197367	1642.7	0.0581516	580.565	barge	0.123312
BIH	NH3	2050	2.8025	196.777	truck	0.197367	1642.7	0.0581516	580.565	barge	0.123312
BLR	LH2	2024	5.46438	529.659	truck	0.317795	5156.76	0.50691	580.565	barge	0.319311
BLR	LH2	2050	3.3189	529.659	truck	0.317795	5156.76	0.386757	580.565	barge	0.243837
BLR	LOHC	2024	4.237	529.659	truck	0.413134	5156.76	0.154703	580.565	barge	0.0975349
BLR	LOHC	2050	3.91607	529.659	truck	0.413134	5156.76	0.154703	580.565	barge	0.0975349
BLR	MeOH	2024	4.36457	529.659	truck	0.550845	5156.76	0.20627	580.565	barge	0.130047
BLR	MeOH	2050	2.89743	529.659	truck	0.550845	5156.76	0.20627	580.565	barge	0.130047
BLR	NH3	2024	3.79097	529.659	truck	0.531248	5156.76	0.182549	580.565	barge	0.123312
BLR	NH3	2050	3.27497	529.659	truck	0.531248	5156.76	0.182549	580.565	barge	0.123312
BLZ	LH2	2024	5.96658	77.8406	truck	0.0467044	9238.42	0.908137	580.565	barge	0.319311
BLZ	LH2	2050	3.47644	77.8406	truck	0.0467044	9238.42	0.692881	580.565	barge	0.243837
BLZ	LOHC	2024	4.0152	77.8406	truck	0.0607157	9238.42	0.277153	580.565	barge	0.0975349
BLZ	LOHC	2050	3.69154	77.8406	truck	0.0607157	9238.42	0.277153	580.565	barge	0.0975349
BLZ	MeOH	2024	4.06158	77.8406	truck	0.0809542	9238.42	0.369537	580.565	barge	0.130047
BLZ	MeOH	2050	2.59443	77.8406	truck	0.0809542	9238.42	0.369537	580.565	barge	0.130047
BLZ	NH3	2024	3.49567	77.8406	truck	0.0780741	9238.42	0.32704	580.565	barge	0.123312
BLZ	NH3	2050	2.97967	77.8406	truck	0.0780741	9238.42	0.32704	580.565	barge	0.123312
BMU	LH2	2024	5.34181	0	none	0	6399.35	0.629056	580.565	barge	0.319311
BMU	LH2	2050	3.11836	0	none	0	6399.35	0.479951	580.565	barge	0.243837
BMU	LOHC	2024	3.86275	0	none	0	6399.35	0.19198	580.565	barge	0.0975349
BMU	LOHC	2050	3.54128	0	none	0	6399.35	0.19198	580.565	barge	0.0975349
BMU	MeOH	2024	3.86414	0	none	0	6399.35	0.255974	580.565	barge	0.130047
BMU	MeOH	2050	2.397	0	none	0	6399.35	0.255974	580.565	barge	0.130047
BMU	NH3	2024	3.30634	0	none	0	6399.35	0.226537	580.565	barge	0.123312
BMU	NH3	2050	2.79034	0	none	0	6399.35	0.226537	580.565	barge	0.123312
BOL	LH2	2024	8.45233	2519.94	rail	1.25997	14328.9	1.40853	580.565	barge	0.319311
BOL	LH2	2050	4.82173	2519.94	rail	0.755982	14328.9	1.07467	580.565	barge	0.243837
BOL	LOHC	2024	4.36606	2519.94	rail	0.241914	14328.9	0.429867	580.565	barge	0.0975349
BOL	LOHC	2050	4.03675	2519.94	rail	0.241914	14328.9	0.429867	580.565	barge	0.0975349
BOL	MeOH	2024	4.51433	2519.94	rail	0.322552	14328.9	0.573156	580.565	barge	0.130047
BOL	MeOH	2050	3.04718	2519.94	rail	0.322552	14328.9	0.573156	580.565	barge	0.130047
BOL	NH3	2024	3.9378	2519.94	rail	0.312221	14328.9	0.507243	580.565	barge	0.123312
BOL	NH3	2050	3.4218	2519.94	rail	0.312221	14328.9	0.507243	580.565	barge	0.123312
BRA	LH2	2024	6.71936	1121.07	rail	0.560535	9895.89	0.972766	580.565	barge	0.319311
BRA	LH2	2050	3.87277	1121.07	rail	0.336321	9895.89	0.742192	580.565	barge	0.243837
BRA	LOHC	2024	4.08566	1121.07	rail	0.107623	9895.89	0.296877	580.565	barge	0.0975349
BRA	LOHC	2050	3.76072	1121.07	rail	0.107623	9895.89	0.296877	580.565	barge	0.0975349
BRA	MeOH	2024	4.15212	1121.07	rail	0.143497	9895.89	0.395836	580.565	barge	0.130047
BRA	MeOH	2050	2.68498	1121.07	rail	0.143497	9895.89	0.395836	580.565	barge	0.130047
BRA	NH3	2024	3.58604	1121.07	rail	0.138901	9895.89	0.350315	580.565	barge	0.123312
BRA	NH3	2050	3.07004	1121.07	rail	0.138901	9895.89	0.350315	580.565	barge	0.123312
BRB	LH2	2024	5.39252	0	none	0	6651.92	0.653884	580.565	barge	0.319311
BRB	LH2	2050	3.14583	0	none	0	6651.92	0.498894	580.565	barge	0.243837
BRB	LOHC	2024	3.8709	0	none	0	6651.92	0.199558	580.565	barge	0.0975349
BRB	LOHC	2050	3.54924	0	none	0	6651.92	0.199558	580.565	barge	0.0975349
BRB	MeOH	2024	3.8745	0	none	0	6651.92	0.266077	580.565	barge	0.130047
BRB	MeOH	2050	2.40736	0	none	0	6651.92	0.266077	580.565	barge	0.130047
BRB	NH3	2024	3.31621	0	none	0	6651.92	0.235478	580.565	barge	0.123312
BRB	NH3	2050	2.80021	0	none	0	6651.92	0.235478	580.565	barge	0.123312
BRN	LH2	2024	6.54731	41.6274	truck	0.0249764	12257.2	1.20488	580.565	barge	0.319311
BRN	LH2	2050	3.78178	41.6274	truck	0.0249764	12257.2	0.91929	580.565	barge	0.243837
BRN	LOHC	2024	4.08423	41.6274	truck	0.0324694	12257.2	0.367716	580.565	barge	0.0975349
BRN	LOHC	2050	3.75833	41.6274	truck	0.0324694	12257.2	0.367716	580.565	barge	0.0975349
BRN	MeOH	2024	4.14765	41.6274	truck	0.0432925	12257.2	0.490288	580.565	barge	0.130047
BRN	MeOH	2050	2.68051	41.6274	truck	0.0432925	12257.2	0.490288	580.565	barge	0.130047
BRN	NH3	2024	3.57721	41.6274	truck	0.0417523	12257.2	0.433905	580.565	barge	0.123312
BRN	NH3	2050	3.06121	41.6274	truck	0.0417523	12257.2	0.433905	580.565	barge	0.123312
BTN	LH2	2024	6.83312	1071.62	rail	0.53581	10610.8	1.04304	580.565	barge	0.319311
BTN	LH2	2050	3.93401	1071.62	rail	0.321486	10610.8	0.79581	580.565	barge	0.243837
BTN	LOHC	2024	4.10386	1071.62	rail	0.102876	10610.8	0.318324	580.565	barge	0.0975349
BTN	LOHC	2050	3.77842	1071.62	rail	0.102876	10610.8	0.318324	580.565	barge	0.0975349
BTN	MeOH	2024	4.17505	1071.62	rail	0.137167	10610.8	0.424432	580.565	barge	0.130047
BTN	MeOH	2050	2.70791	1071.62	rail	0.137167	10610.8	0.424432	580.565	barge	0.130047
BTN	NH3	2024	3.60768	1071.62	rail	0.132774	10610.8	0.375622	580.565	barge	0.123312
BTN	NH3	2050	3.09168	1071.62	rail	0.132774	10610.8	0.375622	580.565	barge	0.123312
BWA	LH2	2024	6.91332	947.029	truck	0.568217	10912.4	1.07269	580.565	barge	0.319311
BWA	LH2	2050	4.20933	947.029	truck	0.568217	10912.4	0.81843	580.565	barge	0.243837
BWA	LOHC	2024	4.74911	947.029	truck	0.738683	10912.4	0.327372	580.565	barge	0.0975349
BWA	LOHC	2050	4.42354	947.029	truck	0.738683	10912.4	0.327372	580.565	barge	0.0975349
BWA	MeOH	2024	5.03504	947.029	truck	0.98491	10912.4	0.436496	580.565	barge	0.130047
BWA	MeOH	2050	3.56789	947.029	truck	0.98491	10912.4	0.436496	580.565	barge	0.130047
BWA	NH3	2024	4.4361	947.029	truck	0.94987	10912.4	0.386299	580.565	barge	0.123312
BWA	NH3	2050	3.9201	947.029	truck	0.94987	10912.4	0.386299	580.565	barge	0.123312
CAF	LH2	2024	6.3061	1273.12	rail	0.63656	7381.61	0.725612	580.565	barge	0.319311
CAF	LH2	2050	3.65009	1273.12	rail	0.381936	7381.61	0.553621	580.565	barge	0.243837
CAF	LOHC	2024	4.01951	1273.12	rail	0.12222	7381.61	0.221448	580.565	barge	0.0975349
CAF	LOHC	2050	3.69635	1273.12	rail	0.12222	7381.61	0.221448	580.565	barge	0.0975349
CAF	MeOH	2024	4.06865	1273.12	rail	0.162959	7381.61	0.295264	580.565	barge	0.130047
CAF	MeOH	2050	2.60151	1273.12	rail	0.162959	7381.61	0.295264	580.565	barge	0.130047
CAF	NH3	2024	3.50717	1273.12	rail	0.15774	7381.61	0.261309	580.565	barge	0.123312
CAF	NH3	2050	2.99117	1273.12	rail	0.15774	7381.61	0.261309	580.565	barge	0.123312
CAN	LH2	2024	5.95768	1102.32	rail	0.55116	6158.92	0.605422	580.565	barge	0.319311
CAN	LH2	2050	3.46011	1102.32	rail	0.330696	6158.92	0.461919	580.565	barge	0.243837
CAN	LOHC	2024	3.9633	1102.32	rail	0.105823	6158.92	0.184768	580.565	barge	0.0975349
CAN	LOHC	2050	3.64118	1102.32	rail	0.105823	6158.92	0.184768	580.565	barge	0.0975349
CAN	MeOH	2024	3.99648	1102.32	rail	0.141097	6158.92	0.246357	580.565	barge	0.130047
CAN	MeOH	2050	2.52934	1102.32	rail	0.141097	6158.92	0.246357	580.565	barge	0.130047
CAN	NH3	2024	3.43758	1102.32	rail	0.136577	6158.92	0.218026	580.565	barge	0.123312
CAN	NH3	2050	2.92158	1102.32	rail	0.136577	6158.92	0.218026	580.565	barge	0.123312
CHL	LH2	2024	7.01522	115.521	truck	0.0693126	14328.9	1.40853	580.565	barge	0.319311
CHL	LH2	2050	4.05391	115.521	truck	0.0693126	14328.9	1.07467	580.565	barge	0.243837
CHL	LOHC	2024	4.20884	115.521	truck	0.0901064	14328.9	0.429867	580.565	barge	0.0975349
CHL	LOHC	2050	3.88134	115.521	truck	0.0901064	14328.9	0.429867	580.565	barge	0.0975349
CHL	MeOH	2024	4.30951	115.521	truck	0.120142	14328.9	0.573156	580.565	barge	0.130047
CHL	MeOH	2050	2.84237	115.521	truck	0.120142	14328.9	0.573156	580.565	barge	0.130047
CHL	NH3	2024	3.73258	115.521	truck	0.115868	14328.9	0.507243	580.565	barge	0.123312
CHL	NH3	2050	3.21658	115.521	truck	0.115868	14328.9	0.507243	580.565	barge	0.123312
CHN	LH2	2024	8.02721	1448.85	rail	0.724425	15425.6	1.51634	580.565	barge	0.319311
CHN	LH2	2050	4.58352	1448.85	rail	0.434655	15425.6	1.15692	580.565	barge	0.243837
CHN	LOHC	2024	4.2962	1448.85	rail	0.13909	15425.6	0.462768	580.565	barge	0.0975349
CHN	LOHC	2050	3.96687	1448.85	rail	0.13909	15425.6	0.462768	580.565	barge	0.0975349
CHN	MeOH	2024	4.42112	1448.85	rail	0.185453	15425.6	0.617024	580.565	barge	0.130047
CHN	MeOH	2050	2.95398	1448.85	rail	0.185453	15425.6	0.617024	580.565	barge	0.130047
CHN	NH3	2024	3.84401	1448.85	rail	0.179513	15425.6	0.546066	580.565	barge	0.123312
CHN	NH3	2050	3.32801	1448.85	rail	0.179513	15425.6	0.546066	580.565	barge	0.123312
CIV	LH2	2024	5.45461	250.564	truck	0.150338	6084.51	0.598107	580.565	barge	0.319311
CIV	LH2	2050	3.24292	250.564	truck	0.150338	6084.51	0.456338	580.565	barge	0.243837
CIV	LOHC	2024	4.0486	250.564	truck	0.19544	6084.51	0.182535	580.565	barge	0.0975349
CIV	LOHC	2050	3.72718	250.564	truck	0.19544	6084.51	0.182535	580.565	barge	0.0975349
CIV	MeOH	2024	4.11207	250.564	truck	0.260587	6084.51	0.24338	580.565	barge	0.130047
CIV	MeOH	2050	2.64493	250.564	truck	0.260587	6084.51	0.24338	580.565	barge	0.130047
CIV	NH3	2024	3.54627	250.564	truck	0.251316	6084.51	0.215392	580.565	barge	0.123312
CIV	NH3	2050	3.03027	250.564	truck	0.251316	6084.51	0.215392	580.565	barge	0.123312
CMR	LH2	2024	5.73806	283.162	truck	0.169897	7382.06	0.725656	580.565	barge	0.319311
CMR	LH2	2050	3.40468	283.162	truck	0.169897	7382.06	0.553654	580.565	barge	0.243837
CMR	LOHC	2024	4.11595	283.162	truck	0.220866	7382.06	0.221462	580.565	barge	0.0975349
CMR	LOHC	2050	3.79353	283.162	truck	0.220866	7382.06	0.221462	580.565	barge	0.0975349
CMR	MeOH	2024	4.19921	283.162	truck	0.294488	7382.06	0.295282	580.565	barge	0.130047
CMR	MeOH	2050	2.73206	283.162	truck	0.294488	7382.06	0.295282	580.565	barge	0.130047
CMR	NH3	2024	3.6298	283.162	truck	0.284011	7382.06	0.261325	580.565	barge	0.123312
CMR	NH3	2050	3.1138	283.162	truck	0.284011	7382.06	0.261325	580.565	barge	0.123312
COD	LH2	2024	5.70441	0	none	0	8205.12	0.806563	580.565	barge	0.319311
COD	LH2	2050	3.31474	0	none	0	8205.12	0.615384	580.565	barge	0.243837
COD	LOHC	2024	3.92099	0	none	0	8205.12	0.246154	580.565	barge	0.0975349
COD	LOHC	2050	3.59816	0	none	0	8205.12	0.246154	580.565	barge	0.0975349
COD	MeOH	2024	3.93818	0	none	0	8205.12	0.328205	580.565	barge	0.130047
COD	MeOH	2050	2.47104	0	none	0	8205.12	0.328205	580.565	barge	0.130047
COD	NH3	2024	3.37692	0	none	0	8205.12	0.290461	580.565	barge	0.123312
COD	NH3	2050	2.86092	0	none	0	8205.12	0.290461	580.565	barge	0.123312
COG	LH2	2024	5.99134	437.85	truck	0.26271	8102.27	0.796453	580.565	barge	0.319311
COG	LH2	2050	3.58104	437.85	truck	0.26271	8102.27	0.60767	580.565	barge	0.243837
COG	LOHC	2024	4.26018	437.85	truck	0.341523	8102.27	0.243068	580.565	barge	0.0975349
COG	LOHC	2050	3.9371	437.85	truck	0.341523	8102.27	0.243068	580.565	barge	0.0975349
COG	MeOH	2024	4.38976	437.85	truck	0.455364	8102.27	0.324091	580.565	barge	0.130047
COG	MeOH	2050	2.92262	437.85	truck	0.455364	8102.27	0.324091	580.565	barge	0.130047
COG	NH3	2024	3.81368	437.85	truck	0.439164	8102.27	0.28682	580.565	barge	0.123312
COG	NH3	2050	3.29768	437.85	truck	0.439164	8102.27	0.28682	580.565	barge	0.123312
COK	LH2	2024	7.66985	0	none	0	17993.2	1.76873	580.565	barge	0.319311
COK	LH2	2050	4.37919	0	none	0	17993.2	1.34949	580.565	barge	0.243837
COK	LOHC	2024	4.23665	0	none	0	17993.2	0.539796	580.565	barge	0.0975349
COK	LOHC	2050	3.90649	0	none	0	17993.2	0.539796	580.565	barge	0.0975349
COK	MeOH	2024	4.33949	0	none	0	17993.2	0.719728	580.565	barge	0.130047
COK	MeOH	2050	2.87235	0	none	0	17993.2	0.719728	580.565	barge	0.130047
COK	NH3	2024	3.75951	0	none	0	17993.2	0.636959	580.565	barge	0.123312
COK	NH3	2050	3.24351	0	none	0	17993.2	0.636959	580.565	barge	0.123312
COL	LH2	2024	6.3906	934.081	truck	0.560449	8354.55	0.821252	580.565	barge	0.319311
COL	LH2	2050	3.92296	934.081	truck	0.560449	8354.55	0.626591	580.565	barge	0.243837
COL	LOHC	2024	4.65649	934.081	truck	0.728583	8354.55	0.250636	580.565	barge	0.0975349
COL	LOHC	2050	4.33285	934.081	truck	0.728583	8354.55	0.250636	580.565	barge	0.0975349
COL	MeOH	2024	4.91668	934.081	truck	0.971444	8354.55	0.334182	580.565	barge	0.130047
COL	MeOH	2050	3.44954	934.081	truck	0.971444	8354.55	0.334182	580.565	barge	0.130047
COL	NH3	2024	4.32309	934.081	truck	0.936883	8354.55	0.295751	580.565	barge	0.123312
COL	NH3	2050	3.80709	934.081	truck	0.936883	8354.55	0.295751	580.565	barge	0.123312
COM	LH2	2024	5.77585	0	none	0	8560.93	0.841539	580.565	barge	0.319311
COM	LH2	2050	3.35343	0	none	0	8560.93	0.64207	580.565	barge	0.243837
COM	LOHC	2024	3.93246	0	none	0	8560.93	0.256828	580.565	barge	0.0975349
COM	LOHC	2050	3.60937	0	none	0	8560.93	0.256828	580.565	barge	0.0975349
COM	MeOH	2024	3.95277	0	none	0	8560.93	0.342437	580.565	barge	0.130047
COM	MeOH	2050	2.48563	0	none	0	8560.93	0.342437	580.565	barge	0.130047
COM	NH3	2024	3.39083	0	none	0	8560.93	0.303057	580.565	barge	0.123312
COM	NH3	2050	2.87483	0	none	0	8560.93	0.303057	580.565	barge	0.123312
CPV	LH2	2024	4.81649	0	none	0	3783.2	0.371889	580.565	barge	0.319311
CPV	LH2	2050	2.83385	0	none	0	3783.2	0.28374	580.565	barge	0.243837
CPV	LOHC	2024	3.77838	0	none	0	3783.2	0.113496	580.565	barge	0.0975349
CPV	LOHC	2050	3.45887	0	none	0	3783.2	0.113496	580.565	barge	0.0975349
CPV	MeOH	2024	3.75688	0	none	0	3783.2	0.151328	580.565	barge	0.130047
CPV	MeOH	2050	2.28974	0	none	0	3783.2	0.151328	580.565	barge	0.130047
CPV	NH3	2024	3.20408	0	none	0	3783.2	0.133925	580.565	barge	0.123312
CPV	NH3	2050	2.68808	0	none	0	3783.2	0.133925	580.565	barge	0.123312
CRI	LH2	2024	5.9837	141.645	truck	0.084987	9100.49	0.894578	580.565	barge	0.319311
CRI	LH2	2050	3.50188	141.645	truck	0.084987	9100.49	0.682537	580.565	barge	0.243837
CRI	LOHC	2024	4.06066	141.645	truck	0.110483	9100.49	0.273015	580.565	barge	0.0975349
CRI	LOHC	2050	3.73706	141.645	truck	0.110483	9100.49	0.273015	580.565	barge	0.0975349
CRI	MeOH	2024	4.12234	141.645	truck	0.147311	9100.49	0.36402	580.565	barge	0.130047
CRI	MeOH	2050	2.6552	141.645	truck	0.147311	9100.49	0.36402	580.565	barge	0.130047
CRI	NH3	2024	3.55451	141.645	truck	0.14207	9100.49	0.322157	580.565	barge	0.123312
CRI	NH3	2050	3.03851	141.645	truck	0.14207	9100.49	0.322157	580.565	barge	0.123312
CUB	LH2	2024	5.80713	0	none	0	8716.67	0.856849	580.565	barge	0.319311
CUB	LH2	2050	3.37037	0	none	0	8716.67	0.65375	580.565	barge	0.243837
CUB	LOHC	2024	3.93748	0	none	0	8716.67	0.2615	580.565	barge	0.0975349
CUB	LOHC	2050	3.61427	0	none	0	8716.67	0.2615	580.565	barge	0.0975349
CUB	MeOH	2024	3.95915	0	none	0	8716.67	0.348667	580.565	barge	0.130047
CUB	MeOH	2050	2.49201	0	none	0	8716.67	0.348667	580.565	barge	0.130047
CUB	NH3	2024	3.39692	0	none	0	8716.67	0.30857	580.565	barge	0.123312
CUB	NH3	2050	2.88092	0	none	0	8716.67	0.30857	580.565	barge	0.123312
CYM	LH2	2024	5.76246	0	none	0	8494.25	0.834985	580.565	barge	0.319311
CYM	LH2	2050	3.34618	0	none	0	8494.25	0.637069	580.565	barge	0.243837
CYM	LOHC	2024	3.93031	0	none	0	8494.25	0.254827	580.565	barge	0.0975349
CYM	LOHC	2050	3.60727	0	none	0	8494.25	0.254827	580.565	barge	0.0975349
CYM	MeOH	2024	3.95003	0	none	0	8494.25	0.33977	580.565	barge	0.130047
CYM	MeOH	2050	2.48289	0	none	0	8494.25	0.33977	580.565	barge	0.130047
CYM	NH3	2024	3.38822	0	none	0	8494.25	0.300696	580.565	barge	0.123312
CYM	NH3	2050	2.87222	0	none	0	8494.25	0.300696	580.565	barge	0.123312
CYP	LH2	2024	4.56966	42.8995	truck	0.0257397	2403.92	0.236305	580.565	barge	0.319311
CYP	LH2	2050	2.71105	42.8995	truck	0.0257397	2403.92	0.180294	580.565	barge	0.243837
CYP	LOHC	2024	3.76746	42.8995	truck	0.0334616	2403.92	0.0721176	580.565	barge	0.0975349
CYP	LOHC	2050	3.44895	42.8995	truck	0.0334616	2403.92	0.0721176	580.565	barge	0.0975349
CYP	MeOH	2024	3.74499	42.8995	truck	0.0446155	2403.92	0.0961568	580.565	barge	0.130047
CYP	MeOH	2050	2.27785	42.8995	truck	0.0446155	2403.92	0.0961568	580.565	barge	0.130047
CYP	NH3	2024	3.19335	42.8995	truck	0.0430282	2403.92	0.0850988	580.565	barge	0.123312
CYP	NH3	2050	2.67735	42.8995	truck	0.0430282	2403.92	0.0850988	580.565	barge	0.123312
DEU	LH2	2024	5.08823	390.719	truck	0.234431	3769.58	0.37055	580.565	barge	0.319311
DEU	LH2	2050	3.07999	390.719	truck	0.234431	3769.58	0.282718	580.565	barge	0.243837
DEU	LOHC	2024	4.08358	390.719	truck	0.304761	3769.58	0.113087	580.565	barge	0.0975349
DEU	LOHC	2050	3.76379	390.719	truck	0.304761	3769.58	0.113087	580.565	barge	0.0975349
DEU	MeOH	2024	4.16306	390.719	truck	0.406348	3769.58	0.150783	580.565	barge	0.130047
DEU	MeOH	2050	2.69592	390.719	truck	0.406348	3769.58	0.150783	580.565	barge	0.130047
DEU	NH3	2024	3.59688	390.719	truck	0.391891	3769.58	0.133443	580.565	barge	0.123312
DEU	NH3	2050	3.08088	390.719	truck	0.391891	3769.58	0.133443	580.565	barge	0.123312
DJI	LH2	2024	5.1697	297.475	truck	0.178485	4501.53	0.4425	580.565	barge	0.319311
DJI	LH2	2050	3.1005	297.475	truck	0.178485	4501.53	0.337615	580.565	barge	0.243837
DJI	LOHC	2024	4.03424	297.475	truck	0.232031	4501.53	0.135046	580.565	barge	0.0975349
DJI	LOHC	2050	3.71397	297.475	truck	0.232031	4501.53	0.135046	580.565	barge	0.0975349
DJI	MeOH	2024	4.096	297.475	truck	0.309374	4501.53	0.180061	580.565	barge	0.130047
DJI	MeOH	2050	2.62886	297.475	truck	0.309374	4501.53	0.180061	580.565	barge	0.130047
DJI	NH3	2024	3.53162	297.475	truck	0.298367	4501.53	0.159354	580.565	barge	0.123312
DJI	NH3	2050	3.01562	297.475	truck	0.298367	4501.53	0.159354	580.565	barge	0.123312
DMA	LH2	2024	5.40585	0	none	0	6718.27	0.660406	580.565	barge	0.319311
DMA	LH2	2050	3.15304	0	none	0	6718.27	0.50387	580.565	barge	0.243837
DMA	LOHC	2024	3.87303	0	none	0	6718.27	0.201548	580.565	barge	0.0975349
DMA	LOHC	2050	3.55133	0	none	0	6718.27	0.201548	580.565	barge	0.0975349
DMA	MeOH	2024	3.87722	0	none	0	6718.27	0.268731	580.565	barge	0.130047
DMA	MeOH	2050	2.41008	0	none	0	6718.27	0.268731	580.565	barge	0.130047
DMA	NH3	2024	3.3188	0	none	0	6718.27	0.237827	580.565	barge	0.123312
DMA	NH3	2050	2.8028	0	none	0	6718.27	0.237827	580.565	barge	0.123312
DNK	LH2	2024	4.9747	0	none	0	4571.11	0.44934	580.565	barge	0.319311
DNK	LH2	2050	2.91954	0	none	0	4571.11	0.342833	580.565	barge	0.243837
DNK	LOHC	2024	3.80379	0	none	0	4571.11	0.137133	580.565	barge	0.0975349
DNK	LOHC	2050	3.48369	0	none	0	4571.11	0.137133	580.565	barge	0.0975349
DNK	MeOH	2024	3.78919	0	none	0	4571.11	0.182844	580.565	barge	0.130047
DNK	MeOH	2050	2.32204	0	none	0	4571.11	0.182844	580.565	barge	0.130047
DNK	NH3	2024	3.23488	0	none	0	4571.11	0.161817	580.565	barge	0.123312
DNK	NH3	2050	2.71888	0	none	0	4571.11	0.161817	580.565	barge	0.123312
DOM	LH2	2024	5.534	0	none	0	7356.5	0.723144	580.565	barge	0.319311
DOM	LH2	2050	3.22245	0	none	0	7356.5	0.551737	580.565	barge	0.243837
DOM	LOHC	2024	3.89362	0	none	0	7356.5	0.220695	580.565	barge	0.0975349
DOM	LOHC	2050	3.57143	0	none	0	7356.5	0.220695	580.565	barge	0.0975349
DOM	MeOH	2024	3.90339	0	none	0	7356.5	0.29426	580.565	barge	0.130047
DOM	MeOH	2050	2.43624	0	none	0	7356.5	0.29426	580.565	barge	0.130047
DOM	NH3	2024	3.34375	0	none	0	7356.5	0.26042	580.565	barge	0.123312
DOM	NH3	2050	2.82775	0	none	0	7356.5	0.26042	580.565	barge	0.123312
DZA	LH2	2024	4.50157	385.957	truck	0.231574	864.624	0.0849925	580.565	barge	0.319311
DZA	LH2	2050	2.76106	385.957	truck	0.231574	864.624	0.0648468	580.565	barge	0.243837
DZA	LOHC	2024	3.98617	385.957	truck	0.301046	864.624	0.0259387	580.565	barge	0.0975349
DZA	LOHC	2050	3.66856	385.957	truck	0.301046	864.624	0.0259387	580.565	barge	0.0975349
DZA	MeOH	2024	4.039	385.957	truck	0.401395	864.624	0.034585	580.565	barge	0.130047
DZA	MeOH	2050	2.57186	385.957	truck	0.401395	864.624	0.034585	580.565	barge	0.130047
DZA	NH3	2024	3.47854	385.957	truck	0.387115	864.624	0.0306077	580.565	barge	0.123312
DZA	NH3	2050	2.96254	385.957	truck	0.387115	864.624	0.0306077	580.565	barge	0.123312
ECU	LH2	2024	6.32868	346.764	truck	0.208058	10100.9	0.992918	580.565	barge	0.319311
ECU	LH2	2050	3.74067	346.764	truck	0.208058	10100.9	0.757567	580.565	barge	0.243837
ECU	LOHC	2024	4.25338	346.764	truck	0.270476	10100.9	0.303027	580.565	barge	0.0975349
ECU	LOHC	2050	3.92887	346.764	truck	0.270476	10100.9	0.303027	580.565	barge	0.0975349
ECU	MeOH	2024	4.37689	346.764	truck	0.360635	10100.9	0.404036	580.565	barge	0.130047
ECU	MeOH	2050	2.90975	346.764	truck	0.360635	10100.9	0.404036	580.565	barge	0.130047
ECU	NH3	2024	3.8001	346.764	truck	0.347804	10100.9	0.357572	580.565	barge	0.123312
ECU	NH3	2050	3.2841	346.764	truck	0.347804	10100.9	0.357572	580.565	barge	0.123312
EGY	LH2	2024	4.58656	174.995	truck	0.104997	2025.92	0.199148	580.565	barge	0.319311
EGY	LH2	2050	2.75365	174.995	truck	0.104997	2025.92	0.151944	580.565	barge	0.243837
EGY	LOHC	2024	3.8586	174.995	truck	0.136496	2025.92	0.0607776	580.565	barge	0.0975349
EGY	LOHC	2050	3.54027	174.995	truck	0.136496	2025.92	0.0607776	580.565	barge	0.0975349
EGY	MeOH	2024	3.867	174.995	truck	0.181995	2025.92	0.0810368	580.565	barge	0.130047
EGY	MeOH	2050	2.39986	174.995	truck	0.181995	2025.92	0.0810368	580.565	barge	0.130047
EGY	NH3	2024	3.31156	174.995	truck	0.17552	2025.92	0.0717176	580.565	barge	0.123312
EGY	NH3	2050	2.79556	174.995	truck	0.17552	2025.92	0.0717176	580.565	barge	0.123312
ERI	LH2	2024	5.35456	592.388	truck	0.355433	4390.38	0.431574	580.565	barge	0.319311
ERI	LH2	2050	3.27531	592.388	truck	0.355433	4390.38	0.329278	580.565	barge	0.243837
ERI	LOHC	2024	4.26136	592.388	truck	0.462063	4390.38	0.131711	580.565	barge	0.0975349
ERI	LOHC	2050	3.94095	592.388	truck	0.462063	4390.38	0.131711	580.565	barge	0.0975349
ERI	MeOH	2024	4.39845	592.388	truck	0.616084	4390.38	0.175615	580.565	barge	0.130047
ERI	MeOH	2050	2.93131	592.388	truck	0.616084	4390.38	0.175615	580.565	barge	0.130047
ERI	NH3	2024	3.82416	592.388	truck	0.594165	4390.38	0.155419	580.565	barge	0.123312
ERI	NH3	2050	3.30816	592.388	truck	0.594165	4390.38	0.155419	580.565	barge	0.123312
ESP	LH2	2024	4.73195	655.311	truck	0.393187	1069.6	0.105142	580.565	barge	0.319311
ESP	LH2	2050	2.95405	655.311	truck	0.393187	1069.6	0.08022	580.565	barge	0.243837
ESP	LOHC	2024	4.20348	655.311	truck	0.511143	1069.6	0.032088	580.565	barge	0.0975349
ESP	LOHC	2050	3.88552	655.311	truck	0.511143	1069.6	0.032088	580.565	barge	0.0975349
ESP	MeOH	2024	4.3278	655.311	truck	0.681523	1069.6	0.042784	580.565	barge	0.130047
ESP	MeOH	2050	2.86066	655.311	truck	0.681523	1069.6	0.042784	580.565	barge	0.130047
ESP	NH3	2024	3.7577	655.311	truck	0.657277	1069.6	0.0378638	580.565	barge	0.123312
ESP	NH3	2050	3.2417	655.311	truck	0.657277	1069.6	0.0378638	580.565	barge	0.123312
EST	LH2	2024	5.11434	22.7279	truck	0.0136367	5187.04	0.509886	580.565	barge	0.319311
EST	LH2	2050	3.00093	22.7279	truck	0.0136367	5187.04	0.389028	580.565	barge	0.243837
EST	LOHC	2024	3.84143	22.7279	truck	0.0177278	5187.04	0.155611	580.565	barge	0.0975349
EST	LOHC	2050	3.52085	22.7279	truck	0.0177278	5187.04	0.155611	580.565	barge	0.0975349
EST	MeOH	2024	3.8381	22.7279	truck	0.023637	5187.04	0.207482	580.565	barge	0.130047
EST	MeOH	2050	2.37096	22.7279	truck	0.023637	5187.04	0.207482	580.565	barge	0.130047
EST	NH3	2024	3.28183	22.7279	truck	0.0227961	5187.04	0.183621	580.565	barge	0.123312
EST	NH3	2050	2.76583	22.7279	truck	0.0227961	5187.04	0.183621	580.565	barge	0.123312
ETH	LH2	2024	5.54504	864.141	truck	0.518485	4388.24	0.431364	580.565	barge	0.319311
ETH	LH2	2050	3.4473	864.141	truck	0.518485	4388.24	0.329118	580.565	barge	0.243837
ETH	LOHC	2024	4.47387	864.141	truck	0.67403	4388.24	0.131647	580.565	barge	0.0975349
ETH	LOHC	2050	4.15326	864.141	truck	0.67403	4388.24	0.131647	580.565	barge	0.0975349
ETH	MeOH	2024	4.68126	864.141	truck	0.898707	4388.24	0.17553	580.565	barge	0.130047
ETH	MeOH	2050	3.21412	864.141	truck	0.898707	4388.24	0.17553	580.565	barge	0.130047
ETH	NH3	2024	4.09765	864.141	truck	0.866733	4388.24	0.155344	580.565	barge	0.123312
ETH	NH3	2050	3.58165	864.141	truck	0.866733	4388.24	0.155344	580.565	barge	0.123312
FIN	LH2	2024	5.10164	0	none	0	5203.31	0.511485	580.565	barge	0.319311
FIN	LH2	2050	2.98829	0	none	0	5203.31	0.390248	580.565	barge	0.243837
FIN	LOHC	2024	3.82418	0	none	0	5203.31	0.156099	580.565	barge	0.0975349
FIN	LOHC	2050	3.5036	0	none	0	5203.31	0.156099	580.565	barge	0.0975349
FIN	MeOH	2024	3.81511	0	none	0	5203.31	0.208132	580.565	barge	0.130047
FIN	MeOH	2050	2.34796	0	none	0	5203.31	0.208132	580.565	barge	0.130047
FIN	NH3	2024	3.25959	0	none	0	5203.31	0.184197	580.565	barge	0.123312
FIN	NH3	2050	2.74359	0	none	0	5203.31	0.184197	580.565	barge	0.123312
FJI	LH2	2024	7.93927	0	none	0	19334.9	1.90062	580.565	barge	0.319311
FJI	LH2	2050	4.5251	0	none	0	19334.9	1.45012	580.565	barge	0.243837
FJI	LOHC	2024	4.27992	0	none	0	19334.9	0.580047	580.565	barge	0.0975349
FJI	LOHC	2050	3.94875	0	none	0	19334.9	0.580047	580.565	barge	0.0975349
FJI	MeOH	2024	4.3945	0	none	0	19334.9	0.773396	580.565	barge	0.130047
FJI	MeOH	2050	2.92736	0	none	0	19334.9	0.773396	580.565	barge	0.130047
FJI	NH3	2024	3.81196	0	none	0	19334.9	0.684455	580.565	barge	0.123312
FJI	NH3	2050	3.29596	0	none	0	19334.9	0.684455	580.565	barge	0.123312
FLK	LH2	2024	6.72013	0	none	0	13263.5	1.3038	580.565	barge	0.319311
FLK	LH2	2050	3.86484	0	none	0	13263.5	0.994762	580.565	barge	0.243837
FLK	LOHC	2024	4.08412	0	none	0	13263.5	0.397905	580.565	barge	0.0975349
FLK	LOHC	2050	3.7575	0	none	0	13263.5	0.397905	580.565	barge	0.0975349
FLK	MeOH	2024	4.14557	0	none	0	13263.5	0.53054	580.565	barge	0.130047
FLK	MeOH	2050	2.67843	0	none	0	13263.5	0.53054	580.565	barge	0.130047
FLK	NH3	2024	3.57464	0	none	0	13263.5	0.469528	580.565	barge	0.123312
FLK	NH3	2050	3.05864	0	none	0	13263.5	0.469528	580.565	barge	0.123312
FRO	LH2	2024	4.95284	0	none	0	4462.28	0.438642	580.565	barge	0.319311
FRO	LH2	2050	2.9077	0	none	0	4462.28	0.334671	580.565	barge	0.243837
FRO	LOHC	2024	3.80028	0	none	0	4462.28	0.133868	580.565	barge	0.0975349
FRO	LOHC	2050	3.48026	0	none	0	4462.28	0.133868	580.565	barge	0.0975349
FRO	MeOH	2024	3.78472	0	none	0	4462.28	0.178491	580.565	barge	0.130047
FRO	MeOH	2050	2.31758	0	none	0	4462.28	0.178491	580.565	barge	0.130047
FRO	NH3	2024	3.23062	0	none	0	4462.28	0.157965	580.565	barge	0.123312
FRO	NH3	2050	2.71462	0	none	0	4462.28	0.157965	580.565	barge	0.123312
FSM	LH2	2024	7.22659	0	none	0	15785.7	1.55173	580.565	barge	0.319311
FSM	LH2	2050	4.13913	0	none	0	15785.7	1.18393	580.565	barge	0.243837
FSM	LOHC	2024	4.16546	0	none	0	15785.7	0.473571	580.565	barge	0.0975349
FSM	LOHC	2050	3.83695	0	none	0	15785.7	0.473571	580.565	barge	0.0975349
FSM	MeOH	2024	4.24898	0	none	0	15785.7	0.631428	580.565	barge	0.130047
FSM	MeOH	2050	2.78184	0	none	0	15785.7	0.631428	580.565	barge	0.130047
FSM	NH3	2024	3.67323	0	none	0	15785.7	0.558814	580.565	barge	0.123312
FSM	NH3	2050	3.15723	0	none	0	15785.7	0.558814	580.565	barge	0.123312
GAB	LH2	2024	5.58883	13.8995	truck	0.0083397	7580.9	0.745202	580.565	barge	0.319311
GAB	LH2	2050	3.25566	13.8995	truck	0.0083397	7580.9	0.568567	580.565	barge	0.243837
GAB	LOHC	2024	3.91173	13.8995	truck	0.0108416	7580.9	0.227427	580.565	barge	0.0975349
GAB	LOHC	2050	3.58936	13.8995	truck	0.0108416	7580.9	0.227427	580.565	barge	0.0975349
GAB	MeOH	2024	3.92706	13.8995	truck	0.0144555	7580.9	0.303236	580.565	barge	0.130047
GAB	MeOH	2050	2.45991	13.8995	truck	0.0144555	7580.9	0.303236	580.565	barge	0.130047
GAB	NH3	2024	3.36651	13.8995	truck	0.0139412	7580.9	0.268364	580.565	barge	0.123312
GAB	NH3	2050	2.85051	13.8995	truck	0.0139412	7580.9	0.268364	580.565	barge	0.123312
GBR	LH2	2024	4.77157	95.468	truck	0.0572808	3225.52	0.317069	580.565	barge	0.319311
GBR	LH2	2050	2.83371	95.468	truck	0.0572808	3225.52	0.241914	580.565	barge	0.243837
GBR	LOHC	2024	3.83507	95.468	truck	0.074465	3225.52	0.0967656	580.565	barge	0.0975349
GBR	LOHC	2050	3.51591	95.468	truck	0.074465	3225.52	0.0967656	580.565	barge	0.0975349
GBR	MeOH	2024	3.8334	95.468	truck	0.0992867	3225.52	0.129021	580.565	barge	0.130047
GBR	MeOH	2050	2.36626	95.468	truck	0.0992867	3225.52	0.129021	580.565	barge	0.130047
GBR	NH3	2024	3.27839	95.468	truck	0.0957544	3225.52	0.114183	580.565	barge	0.123312
GBR	NH3	2050	2.76239	95.468	truck	0.0957544	3225.52	0.114183	580.565	barge	0.123312
GEO	LH2	2024	5.08912	435.759	truck	0.261455	3616.44	0.355496	580.565	barge	0.319311
GEO	LH2	2050	3.09188	435.759	truck	0.261455	3616.44	0.271233	580.565	barge	0.243837
GEO	LOHC	2024	4.11387	435.759	truck	0.339892	3616.44	0.108493	580.565	barge	0.0975349
GEO	LOHC	2050	3.79416	435.759	truck	0.339892	3616.44	0.108493	580.565	barge	0.0975349
GEO	MeOH	2024	4.20367	435.759	truck	0.453189	3616.44	0.144658	580.565	barge	0.130047
GEO	MeOH	2050	2.73653	435.759	truck	0.453189	3616.44	0.144658	580.565	barge	0.130047
GEO	NH3	2024	3.63623	435.759	truck	0.437066	3616.44	0.128022	580.565	barge	0.123312
GEO	NH3	2050	3.12023	435.759	truck	0.437066	3616.44	0.128022	580.565	barge	0.123312
GHA	LH2	2024	5.37334	14.4853	truck	0.00869118	6505.7	0.63951	580.565	barge	0.319311
GHA	LH2	2050	3.13911	14.4853	truck	0.00869118	6505.7	0.487928	580.565	barge	0.243837
GHA	LOHC	2024	3.87751	14.4853	truck	0.0112985	6505.7	0.195171	580.565	barge	0.0975349
GHA	LOHC	2050	3.55595	14.4853	truck	0.0112985	6505.7	0.195171	580.565	barge	0.0975349
GHA	MeOH	2024	3.88358	14.4853	truck	0.0150647	6505.7	0.260228	580.565	barge	0.130047
GHA	MeOH	2050	2.41644	14.4853	truck	0.0150647	6505.7	0.260228	580.565	barge	0.130047
GHA	NH3	2024	3.32508	14.4853	truck	0.0145288	6505.7	0.230302	580.565	barge	0.123312
GHA	NH3	2050	2.80908	14.4853	truck	0.0145288	6505.7	0.230302	580.565	barge	0.123312
GIB	LH2	2024	4.27028	0	none	0	1063.03	0.104496	580.565	barge	0.319311
GIB	LH2	2050	2.53804	0	none	0	1063.03	0.0797272	580.565	barge	0.243837
GIB	LOHC	2024	3.69065	0	none	0	1063.03	0.0318909	580.565	barge	0.0975349
GIB	LOHC	2050	3.37319	0	none	0	1063.03	0.0318909	580.565	barge	0.0975349
GIB	MeOH	2024	3.64535	0	none	0	1063.03	0.0425212	580.565	barge	0.130047
GIB	MeOH	2050	2.17821	0	none	0	1063.03	0.0425212	580.565	barge	0.130047
GIB	NH3	2024	3.09775	0	none	0	1063.03	0.0376313	580.565	barge	0.123312
GIB	NH3	2050	2.58175	0	none	0	1063.03	0.0376313	580.565	barge	0.123312
GIN	LH2	2024	4.99883	0	none	0	4691.27	0.461152	580.565	barge	0.319311
GIN	LH2	2050	2.93261	0	none	0	4691.27	0.351845	580.565	barge	0.243837
GIN	LOHC	2024	3.80766	0	none	0	4691.27	0.140738	580.565	barge	0.0975349
GIN	LOHC	2050	3.48747	0	none	0	4691.27	0.140738	580.565	barge	0.0975349
GIN	MeOH	2024	3.79411	0	none	0	4691.27	0.187651	580.565	barge	0.130047
GIN	MeOH	2050	2.32697	0	none	0	4691.27	0.187651	580.565	barge	0.130047
GIN	NH3	2024	3.23957	0	none	0	4691.27	0.166071	580.565	barge	0.123312
GIN	NH3	2050	2.72357	0	none	0	4691.27	0.166071	580.565	barge	0.123312
GLP	LH2	2024	5.40017	0	none	0	6690	0.657627	580.565	barge	0.319311
GLP	LH2	2050	3.14997	0	none	0	6690	0.50175	580.565	barge	0.243837
GLP	LOHC	2024	3.87212	0	none	0	6690	0.2007	580.565	barge	0.0975349
GLP	LOHC	2050	3.55043	0	none	0	6690	0.2007	580.565	barge	0.0975349
GLP	MeOH	2024	3.87606	0	none	0	6690	0.2676	580.565	barge	0.130047
GLP	MeOH	2050	2.40892	0	none	0	6690	0.2676	580.565	barge	0.130047
GLP	NH3	2024	3.3177	0	none	0	6690	0.236826	580.565	barge	0.123312
GLP	NH3	2050	2.8017	0	none	0	6690	0.236826	580.565	barge	0.123312
GMB	LH2	2024	4.86712	0	none	0	4035.37	0.396677	580.565	barge	0.319311
GMB	LH2	2050	2.86128	0	none	0	4035.37	0.302653	580.565	barge	0.243837
GMB	LOHC	2024	3.78651	0	none	0	4035.37	0.121061	580.565	barge	0.0975349
GMB	LOHC	2050	3.46681	0	none	0	4035.37	0.121061	580.565	barge	0.0975349
GMB	MeOH	2024	3.76722	0	none	0	4035.37	0.161415	580.565	barge	0.130047
GMB	MeOH	2050	2.30008	0	none	0	4035.37	0.161415	580.565	barge	0.130047
GMB	NH3	2024	3.21394	0	none	0	4035.37	0.142852	580.565	barge	0.123312
GMB	NH3	2050	2.69794	0	none	0	4035.37	0.142852	580.565	barge	0.123312
GNB	LH2	2024	4.94936	38.1421	truck	0.0228853	4311.51	0.423821	580.565	barge	0.319311
GNB	LH2	2050	2.91548	38.1421	truck	0.0228853	4311.51	0.323363	580.565	barge	0.243837
GNB	LOHC	2024	3.82525	38.1421	truck	0.0297508	4311.51	0.129345	580.565	barge	0.0975349
GNB	LOHC	2050	3.50532	38.1421	truck	0.0297508	4311.51	0.129345	580.565	barge	0.0975349
GNB	MeOH	2024	3.81825	38.1421	truck	0.0396678	4311.51	0.17246	580.565	barge	0.130047
GNB	MeOH	2050	2.3511	38.1421	truck	0.0396678	4311.51	0.17246	580.565	barge	0.130047
GNB	NH3	2024	3.26313	38.1421	truck	0.0382565	4311.51	0.152627	580.565	barge	0.123312
GNB	NH3	2050	2.74713	38.1421	truck	0.0382565	4311.51	0.152627	580.565	barge	0.123312
GNQ	LH2	2024	5.57507	0	none	0	7561.02	0.743248	580.565	barge	0.319311
GNQ	LH2	2050	3.24469	0	none	0	7561.02	0.567076	580.565	barge	0.243837
GNQ	LOHC	2024	3.90021	0	none	0	7561.02	0.226831	580.565	barge	0.0975349
GNQ	LOHC	2050	3.57787	0	none	0	7561.02	0.226831	580.565	barge	0.0975349
GNQ	MeOH	2024	3.91177	0	none	0	7561.02	0.302441	580.565	barge	0.130047
GNQ	MeOH	2050	2.44463	0	none	0	7561.02	0.302441	580.565	barge	0.130047
GNQ	NH3	2024	3.35174	0	none	0	7561.02	0.26766	580.565	barge	0.123312
GNQ	NH3	2050	2.83574	0	none	0	7561.02	0.26766	580.565	barge	0.123312
GRC	LH2	2024	4.39749	27.5863	truck	0.0165518	1600.08	0.157288	580.565	barge	0.319311
GRC	LH2	2050	2.61392	27.5863	truck	0.0165518	1600.08	0.120006	580.565	barge	0.243837
GRC	LOHC	2024	3.72955	27.5863	truck	0.0215173	1600.08	0.0480024	580.565	barge	0.0975349
GRC	LOHC	2050	3.41166	27.5863	truck	0.0215173	1600.08	0.0480024	580.565	barge	0.0975349
GRC	MeOH	2024	3.69609	27.5863	truck	0.0286898	1600.08	0.0640032	580.565	barge	0.130047
GRC	MeOH	2050	2.22895	27.5863	truck	0.0286898	1600.08	0.0640032	580.565	barge	0.130047
GRC	NH3	2024	3.14652	27.5863	truck	0.0276691	1600.08	0.0566428	580.565	barge	0.123312
GRC	NH3	2050	2.63052	27.5863	truck	0.0276691	1600.08	0.0566428	580.565	barge	0.123312
GRD	LH2	2024	5.4374	0	none	0	6875.39	0.675851	580.565	barge	0.319311
GRD	LH2	2050	3.17013	0	none	0	6875.39	0.515654	580.565	barge	0.243837
GRD	LOHC	2024	3.8781	0	none	0	6875.39	0.206262	580.565	barge	0.0975349
GRD	LOHC	2050	3.55627	0	none	0	6875.39	0.206262	580.565	barge	0.0975349
GRD	MeOH	2024	3.88366	0	none	0	6875.39	0.275016	580.565	barge	0.130047
GRD	MeOH	2050	2.41652	0	none	0	6875.39	0.275016	580.565	barge	0.130047
GRD	NH3	2024	3.32494	0	none	0	6875.39	0.243389	580.565	barge	0.123312
GRD	NH3	2050	2.80894	0	none	0	6875.39	0.243389	580.565	barge	0.123312
GRL	LH2	2024	5.04581	0	none	0	4925.25	0.484152	580.565	barge	0.319311
GRL	LH2	2050	2.95805	0	none	0	4925.25	0.369394	580.565	barge	0.243837
GRL	LOHC	2024	3.81521	0	none	0	4925.25	0.147758	580.565	barge	0.0975349
GRL	LOHC	2050	3.49485	0	none	0	4925.25	0.147758	580.565	barge	0.0975349
GRL	MeOH	2024	3.80371	0	none	0	4925.25	0.19701	580.565	barge	0.130047
GRL	MeOH	2050	2.33656	0	none	0	4925.25	0.19701	580.565	barge	0.130047
GRL	NH3	2024	3.24872	0	none	0	4925.25	0.174354	580.565	barge	0.123312
GRL	NH3	2050	2.73272	0	none	0	4925.25	0.174354	580.565	barge	0.123312
GTM	LH2	2024	6.32298	198.31	truck	0.118986	10591.9	1.04118	580.565	barge	0.319311
GTM	LH2	2050	3.69998	198.31	truck	0.118986	10591.9	0.794392	580.565	barge	0.243837
GTM	LOHC	2024	4.15309	198.31	truck	0.154682	10591.9	0.317757	580.565	barge	0.0975349
GTM	LOHC	2050	3.82832	198.31	truck	0.154682	10591.9	0.317757	580.565	barge	0.0975349
GTM	MeOH	2024	4.24248	198.31	truck	0.206242	10591.9	0.423676	580.565	barge	0.130047
GTM	MeOH	2050	2.77534	198.31	truck	0.206242	10591.9	0.423676	580.565	barge	0.130047
GTM	NH3	2024	3.66985	198.31	truck	0.198905	10591.9	0.374953	580.565	barge	0.123312
GTM	NH3	2050	3.15385	198.31	truck	0.198905	10591.9	0.374953	580.565	barge	0.123312
GUF	LH2	2024	5.33782	0	none	0	6379.48	0.627103	580.565	barge	0.319311
GUF	LH2	2050	3.1162	0	none	0	6379.48	0.478461	580.565	barge	0.243837
GUF	LOHC	2024	3.86211	0	none	0	6379.48	0.191384	580.565	barge	0.0975349
GUF	LOHC	2050	3.54065	0	none	0	6379.48	0.191384	580.565	barge	0.0975349
GUF	MeOH	2024	3.86333	0	none	0	6379.48	0.255179	580.565	barge	0.130047
GUF	MeOH	2050	2.39619	0	none	0	6379.48	0.255179	580.565	barge	0.130047
GUF	NH3	2024	3.30556	0	none	0	6379.48	0.225834	580.565	barge	0.123312
GUF	NH3	2050	2.78956	0	none	0	6379.48	0.225834	580.565	barge	0.123312
GUM	LH2	2024	7.21329	0	none	0	15719.5	1.54523	580.565	barge	0.319311
GUM	LH2	2050	4.13193	0	none	0	15719.5	1.17896	580.565	barge	0.243837
GUM	LOHC	2024	4.16332	0	none	0	15719.5	0.471585	580.565	barge	0.0975349
GUM	LOHC	2050	3.83486	0	none	0	15719.5	0.471585	580.565	barge	0.0975349
GUM	MeOH	2024	4.24627	0	none	0	15719.5	0.62878	580.565	barge	0.130047
GUM	MeOH	2050	2.77913	0	none	0	15719.5	0.62878	580.565	barge	0.130047
GUM	NH3	2024	3.67064	0	none	0	15719.5	0.55647	580.565	barge	0.123312
GUM	NH3	2050	3.15464	0	none	0	15719.5	0.55647	580.565	barge	0.123312
GUY	LH2	2024	5.45715	44.5269	truck	0.0267161	6817.96	0.670205	580.565	barge	0.319311
GUY	LH2	2050	3.1921	44.5269	truck	0.0267161	6817.96	0.511347	580.565	barge	0.243837
GUY	LOHC	2024	3.91108	44.5269	truck	0.034731	6817.96	0.204539	580.565	barge	0.0975349
GUY	LOHC	2050	3.58926	44.5269	truck	0.034731	6817.96	0.204539	580.565	barge	0.0975349
GUY	MeOH	2024	3.92766	44.5269	truck	0.046308	6817.96	0.272718	580.565	barge	0.130047
GUY	MeOH	2050	2.46052	44.5269	truck	0.046308	6817.96	0.272718	580.565	barge	0.130047
GUY	NH3	2024	3.36752	44.5269	truck	0.0446605	6817.96	0.241356	580.565	barge	0.123312
GUY	NH3	2050	2.85152	44.5269	truck	0.0446605	6817.96	0.241356	580.565	barge	0.123312
HKG	LH2	2024	6.87898	0	none	0	14054.6	1.38157	580.565	barge	0.319311
HKG	LH2	2050	3.95087	0	none	0	14054.6	1.0541	580.565	barge	0.243837
HKG	LOHC	2024	4.10963	0	none	0	14054.6	0.421638	580.565	barge	0.0975349
HKG	LOHC	2050	3.78242	0	none	0	14054.6	0.421638	580.565	barge	0.0975349
HKG	MeOH	2024	4.17801	0	none	0	14054.6	0.562184	580.565	barge	0.130047
HKG	MeOH	2050	2.71087	0	none	0	14054.6	0.562184	580.565	barge	0.130047
HKG	NH3	2024	3.60556	0	none	0	14054.6	0.497533	580.565	barge	0.123312
HKG	NH3	2050	3.08956	0	none	0	14054.6	0.497533	580.565	barge	0.123312
HND	LH2	2024	6.10837	275.164	truck	0.165098	9254.22	0.90969	580.565	barge	0.319311
HND	LH2	2050	3.60321	275.164	truck	0.165098	9254.22	0.694066	580.565	barge	0.243837
HND	LOHC	2024	4.17007	275.164	truck	0.214628	9254.22	0.277627	580.565	barge	0.0975349
HND	LOHC	2050	3.84625	275.164	truck	0.214628	9254.22	0.277627	580.565	barge	0.0975349
HND	MeOH	2024	4.26764	275.164	truck	0.286171	9254.22	0.370169	580.565	barge	0.130047
HND	MeOH	2050	2.8005	275.164	truck	0.286171	9254.22	0.370169	580.565	barge	0.130047
HND	NH3	2024	3.69493	275.164	truck	0.275989	9254.22	0.327599	580.565	barge	0.123312
HND	NH3	2050	3.17893	275.164	truck	0.275989	9254.22	0.327599	580.565	barge	0.123312
HRV	LH2	2024	4.62433	263.518	truck	0.158111	1904.34	0.187197	580.565	barge	0.319311
HRV	LH2	2050	2.79653	263.518	truck	0.158111	1904.34	0.142825	580.565	barge	0.243837
HRV	LOHC	2024	3.92392	263.518	truck	0.205544	1904.34	0.0571302	580.565	barge	0.0975349
HRV	LOHC	2050	3.60563	263.518	truck	0.205544	1904.34	0.0571302	580.565	barge	0.0975349
HRV	MeOH	2024	3.95417	263.518	truck	0.274059	1904.34	0.0761736	580.565	barge	0.130047
HRV	MeOH	2050	2.48703	263.518	truck	0.274059	1904.34	0.0761736	580.565	barge	0.130047
HRV	NH3	2024	3.39592	263.518	truck	0.264309	1904.34	0.0674136	580.565	barge	0.123312
HRV	NH3	2050	2.87992	263.518	truck	0.264309	1904.34	0.0674136	580.565	barge	0.123312
HTI	LH2	2024	5.58686	0	none	0	7619.71	0.749017	580.565	barge	0.319311
HTI	LH2	2050	3.25107	0	none	0	7619.71	0.571478	580.565	barge	0.243837
HTI	LOHC	2024	3.90211	0	none	0	7619.71	0.228591	580.565	barge	0.0975349
HTI	LOHC	2050	3.57972	0	none	0	7619.71	0.228591	580.565	barge	0.0975349
HTI	MeOH	2024	3.91418	0	none	0	7619.71	0.304788	580.565	barge	0.130047
HTI	MeOH	2050	2.44704	0	none	0	7619.71	0.304788	580.565	barge	0.130047
HTI	NH3	2024	3.35404	0	none	0	7619.71	0.269738	580.565	barge	0.123312
HTI	NH3	2050	2.83804	0	none	0	7619.71	0.269738	580.565	barge	0.123312
IDN	LH2	2024	6.40521	0	none	0	11695.2	1.14964	580.565	barge	0.319311
IDN	LH2	2050	3.69428	0	none	0	11695.2	0.87714	580.565	barge	0.243837
IDN	LOHC	2024	4.03354	0	none	0	11695.2	0.350856	580.565	barge	0.0975349
IDN	LOHC	2050	3.7081	0	none	0	11695.2	0.350856	580.565	barge	0.0975349
IDN	MeOH	2024	4.08127	0	none	0	11695.2	0.467808	580.565	barge	0.130047
IDN	MeOH	2050	2.61413	0	none	0	11695.2	0.467808	580.565	barge	0.130047
IDN	NH3	2024	3.51334	0	none	0	11695.2	0.41401	580.565	barge	0.123312
IDN	NH3	2050	2.99734	0	none	0	11695.2	0.41401	580.565	barge	0.123312
IND	LH2	2024	6.42299	1312.1	rail	0.65605	7846.77	0.771337	580.565	barge	0.319311
IND	LH2	2050	3.71368	1312.1	rail	0.39363	7846.77	0.588508	580.565	barge	0.243837
IND	LOHC	2024	4.03834	1312.1	rail	0.125962	7846.77	0.235403	580.565	barge	0.0975349
IND	LOHC	2050	3.7148	1312.1	rail	0.125962	7846.77	0.235403	580.565	barge	0.0975349
IND	MeOH	2024	4.09275	1312.1	rail	0.167949	7846.77	0.313871	580.565	barge	0.130047
IND	MeOH	2050	2.62561	1312.1	rail	0.167949	7846.77	0.313871	580.565	barge	0.130047
IND	NH3	2024	3.53032	1312.1	rail	0.162569	7846.77	0.277776	580.565	barge	0.123312
IND	NH3	2050	3.01432	1312.1	rail	0.162569	7846.77	0.277776	580.565	barge	0.123312
IRL	LH2	2024	4.75582	0	none	0	3481.09	0.342191	580.565	barge	0.319311
IRL	LH2	2050	2.801	0	none	0	3481.09	0.261082	580.565	barge	0.243837
IRL	LOHC	2024	3.76864	0	none	0	3481.09	0.104433	580.565	barge	0.0975349
IRL	LOHC	2050	3.44935	0	none	0	3481.09	0.104433	580.565	barge	0.0975349
IRL	MeOH	2024	3.74449	0	none	0	3481.09	0.139244	580.565	barge	0.130047
IRL	MeOH	2050	2.27735	0	none	0	3481.09	0.139244	580.565	barge	0.130047
IRL	NH3	2024	3.19227	0	none	0	3481.09	0.123231	580.565	barge	0.123312
IRL	NH3	2050	2.67627	0	none	0	3481.09	0.123231	580.565	barge	0.123312
IRN	LH2	2024	6.51117	1532.94	rail	0.76647	7623.29	0.749369	580.565	barge	0.319311
IRN	LH2	2050	3.76308	1532.94	rail	0.459882	7623.29	0.571747	580.565	barge	0.243837
IRN	LOHC	2024	4.05283	1532.94	rail	0.147162	7623.29	0.228699	580.565	barge	0.0975349
IRN	LOHC	2050	3.7293	1532.94	rail	0.147162	7623.29	0.228699	580.565	barge	0.0975349
IRN	MeOH	2024	4.11207	1532.94	rail	0.196216	7623.29	0.304932	580.565	barge	0.130047
IRN	MeOH	2050	2.64493	1532.94	rail	0.196216	7623.29	0.304932	580.565	barge	0.130047
IRN	NH3	2024	3.54976	1532.94	rail	0.189931	7623.29	0.269864	580.565	barge	0.123312
IRN	NH3	2050	3.03376	1532.94	rail	0.189931	7623.29	0.269864	580.565	barge	0.123312
IRQ	LH2	2024	6.16911	640.169	truck	0.384101	8279.75	0.813899	580.565	barge	0.319311
IRQ	LH2	2050	3.72856	640.169	truck	0.384101	8279.75	0.620981	580.565	barge	0.243837
IRQ	LOHC	2024	4.42416	640.169	truck	0.499332	8279.75	0.248392	580.565	barge	0.0975349
IRQ	LOHC	2050	4.1008	640.169	truck	0.499332	8279.75	0.248392	580.565	barge	0.0975349
IRQ	MeOH	2024	4.60766	640.169	truck	0.665776	8279.75	0.33119	580.565	barge	0.130047
IRQ	MeOH	2050	3.14051	640.169	truck	0.665776	8279.75	0.33119	580.565	barge	0.130047
IRQ	NH3	2024	4.02429	640.169	truck	0.64209	8279.75	0.293103	580.565	barge	0.123312
IRQ	NH3	2050	3.50829	640.169	truck	0.64209	8279.75	0.293103	580.565	barge	0.123312
ISL	LH2	2024	5.0139	52.4861	truck	0.0314917	4582.73	0.450482	580.565	barge	0.319311
ISL	LH2	2050	2.95407	52.4861	truck	0.0314917	4582.73	0.343705	580.565	barge	0.243837
ISL	LOHC	2024	3.84522	52.4861	truck	0.0409392	4582.73	0.137482	580.565	barge	0.0975349
ISL	LOHC	2050	3.52507	52.4861	truck	0.0409392	4582.73	0.137482	580.565	barge	0.0975349
ISL	MeOH	2024	3.8443	52.4861	truck	0.0545855	4582.73	0.183309	580.565	barge	0.130047
ISL	MeOH	2050	2.37716	52.4861	truck	0.0545855	4582.73	0.183309	580.565	barge	0.130047
ISL	NH3	2024	3.28817	52.4861	truck	0.0526436	4582.73	0.162229	580.565	barge	0.123312
ISL	NH3	2050	2.77217	52.4861	truck	0.0526436	4582.73	0.162229	580.565	barge	0.123312
ISR	LH2	2024	4.55271	52.9774	truck	0.0317864	2284.24	0.224541	580.565	barge	0.319311
ISR	LH2	2050	2.70442	52.9774	truck	0.0317864	2284.24	0.171318	580.565	barge	0.243837
ISR	LOHC	2024	3.77148	52.9774	truck	0.0413224	2284.24	0.0685272	580.565	barge	0.0975349
ISR	LOHC	2050	3.45306	52.9774	truck	0.0413224	2284.24	0.0685272	580.565	barge	0.0975349
ISR	MeOH	2024	3.75057	52.9774	truck	0.0550965	2284.24	0.0913696	580.565	barge	0.130047
ISR	MeOH	2050	2.28343	52.9774	truck	0.0550965	2284.24	0.0913696	580.565	barge	0.130047
ISR	NH3	2024	3.19882	52.9774	truck	0.0531363	2284.24	0.0808621	580.565	barge	0.123312
ISR	NH3	2050	2.68282	52.9774	truck	0.0531363	2284.24	0.0808621	580.565	barge	0.123312
ITA	LH2	2024	4.17022	14.0711	truck	0.00844266	515.53	0.0506766	580.565	barge	0.319311
ITA	LH2	2050	2.48741	14.0711	truck	0.00844266	515.53	0.0386647	580.565	barge	0.243837
ITA	LOHC	2024	3.684	14.0711	truck	0.0109755	515.53	0.0154659	580.565	barge	0.0975349
ITA	LOHC	2050	3.36694	14.0711	truck	0.0109755	515.53	0.0154659	580.565	barge	0.0975349
ITA	MeOH	2024	3.63755	14.0711	truck	0.0146339	515.53	0.0206212	580.565	barge	0.130047
ITA	MeOH	2050	2.17041	14.0711	truck	0.0146339	515.53	0.0206212	580.565	barge	0.130047
ITA	NH3	2024	3.09052	14.0711	truck	0.0141133	515.53	0.0182498	580.565	barge	0.123312
ITA	NH3	2050	2.57452	14.0711	truck	0.0141133	515.53	0.0182498	580.565	barge	0.123312
JAM	LH2	2024	5.72627	58.8357	truck	0.0353014	8108.15	0.797031	580.565	barge	0.319311
JAM	LH2	2050	3.34148	58.8357	truck	0.0353014	8108.15	0.608111	580.565	barge	0.243837
JAM	LOHC	2024	3.96388	58.8357	truck	0.0458918	8108.15	0.243245	580.565	barge	0.0975349
JAM	LOHC	2050	3.64109	58.8357	truck	0.0458918	8108.15	0.243245	580.565	barge	0.0975349
JAM	MeOH	2024	3.99545	58.8357	truck	0.0611891	8108.15	0.324326	580.565	barge	0.130047
JAM	MeOH	2050	2.52831	58.8357	truck	0.0611891	8108.15	0.324326	580.565	barge	0.130047
JAM	NH3	2024	3.43236	58.8357	truck	0.0590122	8108.15	0.287029	580.565	barge	0.123312
JAM	NH3	2050	2.91636	58.8357	truck	0.0590122	8108.15	0.287029	580.565	barge	0.123312
JOR	LH2	2024	4.84787	320.987	truck	0.192592	2816.54	0.276866	580.565	barge	0.319311
JOR	LH2	2050	2.93216	320.987	truck	0.192592	2816.54	0.21124	580.565	barge	0.243837
JOR	LOHC	2024	3.9983	320.987	truck	0.25037	2816.54	0.0844962	580.565	barge	0.0975349
JOR	LOHC	2050	3.67927	320.987	truck	0.25037	2816.54	0.0844962	580.565	barge	0.0975349
JOR	MeOH	2024	4.0514	320.987	truck	0.333826	2816.54	0.112662	580.565	barge	0.130047
JOR	MeOH	2050	2.58425	320.987	truck	0.333826	2816.54	0.112662	580.565	barge	0.130047
JOR	NH3	2024	3.48943	320.987	truck	0.32195	2816.54	0.0997055	580.565	barge	0.123312
JOR	NH3	2050	2.97343	320.987	truck	0.32195	2816.54	0.0997055	580.565	barge	0.123312
JPN	LH2	2024	7.62626	377.624	truck	0.226574	16455	1.61753	580.565	barge	0.319311
JPN	LH2	2050	4.45123	377.624	truck	0.226574	16455	1.23412	580.565	barge	0.243837
JPN	LOHC	2024	4.48244	377.624	truck	0.294547	16455	0.49365	580.565	barge	0.0975349
JPN	LOHC	2050	4.15315	377.624	truck	0.294547	16455	0.49365	580.565	barge	0.0975349
JPN	MeOH	2024	4.66953	377.624	truck	0.392729	16455	0.6582	580.565	barge	0.130047
JPN	MeOH	2050	3.20239	377.624	truck	0.392729	16455	0.6582	580.565	barge	0.130047
JPN	NH3	2024	4.07954	377.624	truck	0.378757	16455	0.582507	580.565	barge	0.123312
JPN	NH3	2050	3.56354	377.624	truck	0.378757	16455	0.582507	580.565	barge	0.123312
KAZ	LH2	2024	6.62393	3084.53	rail	1.54226	3529.3	0.34693	580.565	barge	0.319311
KAZ	LH2	2050	3.8357	3084.53	rail	0.925359	3529.3	0.264697	580.565	barge	0.243837
KAZ	LOHC	2024	4.07325	3084.53	rail	0.296115	3529.3	0.105879	580.565	barge	0.0975349
KAZ	LOHC	2050	3.75161	3084.53	rail	0.296115	3529.3	0.105879	580.565	barge	0.0975349
KAZ	MeOH	2024	4.14438	3084.53	rail	0.39482	3529.3	0.141172	580.565	barge	0.130047
KAZ	MeOH	2050	2.67723	3084.53	rail	0.39482	3529.3	0.141172	580.565	barge	0.130047
KAZ	NH3	2024	3.5877	3084.53	rail	0.382173	3529.3	0.124937	580.565	barge	0.123312
KAZ	NH3	2050	3.0717	3084.53	rail	0.382173	3529.3	0.124937	580.565	barge	0.123312
KEN	LH2	2024	5.97224	514.753	truck	0.308852	7738.06	0.760651	580.565	barge	0.319311
KEN	LH2	2050	3.59017	514.753	truck	0.308852	7738.06	0.580354	580.565	barge	0.243837
KEN	LOHC	2024	4.30859	514.753	truck	0.401507	7738.06	0.232142	580.565	barge	0.0975349
KEN	LOHC	2050	3.98573	514.753	truck	0.401507	7738.06	0.232142	580.565	barge	0.0975349
KEN	MeOH	2024	4.45489	514.753	truck	0.535343	7738.06	0.309522	580.565	barge	0.130047
KEN	MeOH	2050	2.98775	514.753	truck	0.535343	7738.06	0.309522	580.565	barge	0.130047
KEN	NH3	2024	3.87686	514.753	truck	0.516297	7738.06	0.273927	580.565	barge	0.123312
KEN	NH3	2050	3.36086	514.753	truck	0.516297	7738.06	0.273927	580.565	barge	0.123312
KGZ	LH2	2024	7.54157	3209.11	rail	1.60455	7725.39	0.759406	580.565	barge	0.319311
KGZ	LH2	2050	4.33361	3209.11	rail	0.962733	7725.39	0.579404	580.565	barge	0.243837
KGZ	LOHC	2024	4.22081	3209.11	rail	0.308075	7725.39	0.231762	580.565	barge	0.0975349
KGZ	LOHC	2050	3.89594	3209.11	rail	0.308075	7725.39	0.231762	580.565	barge	0.0975349
KGZ	MeOH	2024	4.33249	3209.11	rail	0.410766	7725.39	0.309016	580.565	barge	0.130047
KGZ	MeOH	2050	2.86534	3209.11	rail	0.410766	7725.39	0.309016	580.565	barge	0.130047
KGZ	NH3	2024	3.76761	3209.11	rail	0.397609	7725.39	0.273479	580.565	barge	0.123312
KGZ	NH3	2050	3.25161	3209.11	rail	0.397609	7725.39	0.273479	580.565	barge	0.123312
KHM	LH2	2024	6.60232	139.255	truck	0.083553	12189.6	1.19824	580.565	barge	0.319311
KHM	LH2	2050	3.8363	139.255	truck	0.083553	12189.6	0.91422	580.565	barge	0.243837
KHM	LOHC	2024	4.15842	139.255	truck	0.108619	12189.6	0.365688	580.565	barge	0.0975349
KHM	LOHC	2050	3.8325	139.255	truck	0.108619	12189.6	0.365688	580.565	barge	0.0975349
KHM	MeOH	2024	4.24651	139.255	truck	0.144825	12189.6	0.487584	580.565	barge	0.130047
KHM	MeOH	2050	2.77937	139.255	truck	0.144825	12189.6	0.487584	580.565	barge	0.130047
KHM	NH3	2024	3.67285	139.255	truck	0.139673	12189.6	0.431512	580.565	barge	0.123312
KHM	NH3	2050	3.15685	139.255	truck	0.139673	12189.6	0.431512	580.565	barge	0.123312
KIR	LH2	2024	7.4864	0	none	0	17079.6	1.67892	580.565	barge	0.319311
KIR	LH2	2050	4.27984	0	none	0	17079.6	1.28097	580.565	barge	0.243837
KIR	LOHC	2024	4.20719	0	none	0	17079.6	0.512388	580.565	barge	0.0975349
KIR	LOHC	2050	3.87771	0	none	0	17079.6	0.512388	580.565	barge	0.0975349
KIR	MeOH	2024	4.30203	0	none	0	17079.6	0.683184	580.565	barge	0.130047
KIR	MeOH	2050	2.83489	0	none	0	17079.6	0.683184	580.565	barge	0.130047
KIR	NH3	2024	3.7238	0	none	0	17079.6	0.604618	580.565	barge	0.123312
KIR	NH3	2050	3.2078	0	none	0	17079.6	0.604618	580.565	barge	0.123312
KNA	LH2	2024	5.41811	0	none	0	6779.35	0.66641	580.565	barge	0.319311
KNA	LH2	2050	3.15969	0	none	0	6779.35	0.508451	580.565	barge	0.243837
KNA	LOHC	2024	3.875	0	none	0	6779.35	0.20338	580.565	barge	0.0975349
KNA	LOHC	2050	3.55325	0	none	0	6779.35	0.20338	580.565	barge	0.0975349
KNA	MeOH	2024	3.87972	0	none	0	6779.35	0.271174	580.565	barge	0.130047
KNA	MeOH	2050	2.41258	0	none	0	6779.35	0.271174	580.565	barge	0.130047
KNA	NH3	2024	3.32119	0	none	0	6779.35	0.239989	580.565	barge	0.123312
KNA	NH3	2050	2.80519	0	none	0	6779.35	0.239989	580.565	barge	0.123312
KOR	LH2	2024	7.6006	423.305	truck	0.253983	16167.4	1.58926	580.565	barge	0.319311
KOR	LH2	2050	4.44891	423.305	truck	0.253983	16167.4	1.21256	580.565	barge	0.243837
KOR	LOHC	2024	4.5089	423.305	truck	0.330178	16167.4	0.485022	580.565	barge	0.0975349
KOR	LOHC	2050	4.17979	423.305	truck	0.330178	16167.4	0.485022	580.565	barge	0.0975349
KOR	MeOH	2024	4.70529	423.305	truck	0.440237	16167.4	0.646696	580.565	barge	0.130047
KOR	MeOH	2050	3.23815	423.305	truck	0.440237	16167.4	0.646696	580.565	barge	0.130047
KOR	NH3	2024	4.11428	423.305	truck	0.424575	16167.4	0.572326	580.565	barge	0.123312
KOR	NH3	2050	3.59828	423.305	truck	0.424575	16167.4	0.572326	580.565	barge	0.123312
KWT	LH2	2024	5.79625	118.367	truck	0.0710202	8248.41	0.810819	580.565	barge	0.319311
KWT	LH2	2050	3.39446	118.367	truck	0.0710202	8248.41	0.618631	580.565	barge	0.243837
KWT	LOHC	2024	4.01497	118.367	truck	0.0923263	8248.41	0.247452	580.565	barge	0.0975349
KWT	LOHC	2050	3.69203	118.367	truck	0.0923263	8248.41	0.247452	580.565	barge	0.0975349
KWT	MeOH	2024	4.06317	118.367	truck	0.123102	8248.41	0.329936	580.565	barge	0.130047
KWT	MeOH	2050	2.59603	118.367	truck	0.123102	8248.41	0.329936	580.565	barge	0.130047
KWT	NH3	2024	3.49777	118.367	truck	0.118722	8248.41	0.291994	580.565	barge	0.123312
KWT	NH3	2050	2.98177	118.367	truck	0.118722	8248.41	0.291994	580.565	barge	0.123312
LAO	LH2	2024	7.07492	668.942	truck	0.401365	12690.1	1.24744	580.565	barge	0.319311
LAO	LH2	2050	4.22642	668.942	truck	0.401365	12690.1	0.951757	580.565	barge	0.243837
LAO	LOHC	2024	4.58891	668.942	truck	0.521775	12690.1	0.380703	580.565	barge	0.0975349
LAO	LOHC	2050	4.26222	668.942	truck	0.521775	12690.1	0.380703	580.565	barge	0.0975349
LAO	MeOH	2024	4.81843	668.942	truck	0.6957	12690.1	0.507604	580.565	barge	0.130047
LAO	MeOH	2050	3.35129	668.942	truck	0.6957	12690.1	0.507604	580.565	barge	0.130047
LAO	NH3	2024	4.22564	668.942	truck	0.670949	12690.1	0.44923	580.565	barge	0.123312
LAO	NH3	2050	3.70964	668.942	truck	0.670949	12690.1	0.44923	580.565	barge	0.123312
LBN	LH2	2024	4.61015	90.697	truck	0.0544182	2438.35	0.23969	580.565	barge	0.319311
LBN	LH2	2050	2.74508	90.697	truck	0.0544182	2438.35	0.182876	580.565	barge	0.243837
LBN	LOHC	2024	3.80596	90.697	truck	0.0707437	2438.35	0.0731505	580.565	barge	0.0975349
LBN	LOHC	2050	3.48739	90.697	truck	0.0707437	2438.35	0.0731505	580.565	barge	0.0975349
LBN	MeOH	2024	3.79616	90.697	truck	0.0943249	2438.35	0.097534	580.565	barge	0.130047
LBN	MeOH	2050	2.32902	90.697	truck	0.0943249	2438.35	0.097534	580.565	barge	0.130047
LBN	NH3	2024	3.24282	90.697	truck	0.0909691	2438.35	0.0863176	580.565	barge	0.123312
LBN	NH3	2050	2.72682	90.697	truck	0.0909691	2438.35	0.0863176	580.565	barge	0.123312
LBR	LH2	2024	5.64369	639.673	truck	0.383804	5664.85	0.556855	580.565	barge	0.319311
LBR	LH2	2050	3.44388	639.673	truck	0.383804	5664.85	0.424864	580.565	barge	0.243837
LBR	LOHC	2024	4.33945	639.673	truck	0.498945	5664.85	0.169945	580.565	barge	0.0975349
LBR	LOHC	2050	4.01805	639.673	truck	0.498945	5664.85	0.169945	580.565	barge	0.0975349
LBR	MeOH	2024	4.49993	639.673	truck	0.66526	5664.85	0.226594	580.565	barge	0.130047
LBR	MeOH	2050	3.03279	639.673	truck	0.66526	5664.85	0.226594	580.565	barge	0.130047
LBR	NH3	2024	3.92158	639.673	truck	0.641592	5664.85	0.200536	580.565	barge	0.123312
LBR	NH3	2050	3.40558	639.673	truck	0.641592	5664.85	0.200536	580.565	barge	0.123312
LBY	LH2	2024	4.38876	111.355	truck	0.066813	1263.52	0.124204	580.565	barge	0.319311
LBY	LH2	2050	2.63041	111.355	truck	0.066813	1263.52	0.094764	580.565	barge	0.243837
LBY	LOHC	2024	3.78423	111.355	truck	0.0868569	1263.52	0.0379056	580.565	barge	0.0975349
LBY	LOHC	2050	3.46652	111.355	truck	0.0868569	1263.52	0.0379056	580.565	barge	0.0975349
LBY	MeOH	2024	3.76949	111.355	truck	0.115809	1263.52	0.0505408	580.565	barge	0.130047
LBY	MeOH	2050	2.30235	111.355	truck	0.115809	1263.52	0.0505408	580.565	barge	0.130047
LBY	NH3	2024	3.21769	111.355	truck	0.111689	1263.52	0.0447286	580.565	barge	0.123312
LBY	NH3	2050	2.70169	111.355	truck	0.111689	1263.52	0.0447286	580.565	barge	0.123312
LCA	LH2	2024	5.41431	0	none	0	6760.41	0.664548	580.565	barge	0.319311
LCA	LH2	2050	3.15763	0	none	0	6760.41	0.507031	580.565	barge	0.243837
LCA	LOHC	2024	3.87439	0	none	0	6760.41	0.202812	580.565	barge	0.0975349
LCA	LOHC	2050	3.55265	0	none	0	6760.41	0.202812	580.565	barge	0.0975349
LCA	MeOH	2024	3.87895	0	none	0	6760.41	0.270416	580.565	barge	0.130047
LCA	MeOH	2050	2.4118	0	none	0	6760.41	0.270416	580.565	barge	0.130047
LCA	NH3	2024	3.32045	0	none	0	6760.41	0.239319	580.565	barge	0.123312
LCA	NH3	2050	2.80445	0	none	0	6760.41	0.239319	580.565	barge	0.123312
LKA	LH2	2024	5.81291	100.054	truck	0.0600324	8395.43	0.825271	580.565	barge	0.319311
LKA	LH2	2050	3.39884	100.054	truck	0.0600324	8395.43	0.629657	580.565	barge	0.243837
LKA	LOHC	2024	4.00539	100.054	truck	0.0780421	8395.43	0.251863	580.565	barge	0.0975349
LKA	LOHC	2050	3.68235	100.054	truck	0.0780421	8395.43	0.251863	580.565	barge	0.0975349
LKA	MeOH	2024	4.05014	100.054	truck	0.104056	8395.43	0.335817	580.565	barge	0.130047
LKA	MeOH	2050	2.583	100.054	truck	0.104056	8395.43	0.335817	580.565	barge	0.130047
LKA	NH3	2024	3.48508	100.054	truck	0.100354	8395.43	0.297198	580.565	barge	0.123312
LKA	NH3	2050	2.96908	100.054	truck	0.100354	8395.43	0.297198	580.565	barge	0.123312
LSO	LH2	2024	6.65473	578.933	truck	0.34736	10912.4	1.07269	580.565	barge	0.319311
LSO	LH2	2050	3.97605	578.933	truck	0.34736	10912.4	0.81843	580.565	barge	0.243837
LSO	LOHC	2024	4.46117	578.933	truck	0.451568	10912.4	0.327372	580.565	barge	0.0975349
LSO	LOHC	2050	4.13588	578.933	truck	0.451568	10912.4	0.327372	580.565	barge	0.0975349
LSO	MeOH	2024	4.65185	578.933	truck	0.60209	10912.4	0.436496	580.565	barge	0.130047
LSO	MeOH	2050	3.1847	578.933	truck	0.60209	10912.4	0.436496	580.565	barge	0.130047
LSO	NH3	2024	4.06555	578.933	truck	0.58067	10912.4	0.386299	580.565	barge	0.123312
LSO	NH3	2050	3.54955	578.933	truck	0.58067	10912.4	0.386299	580.565	barge	0.123312
LTU	LH2	2024	5.09222	0	none	0	5156.36	0.50687	580.565	barge	0.319311
LTU	LH2	2050	2.98319	0	none	0	5156.36	0.386727	580.565	barge	0.243837
LTU	LOHC	2024	3.82266	0	none	0	5156.36	0.154691	580.565	barge	0.0975349
LTU	LOHC	2050	3.50213	0	none	0	5156.36	0.154691	580.565	barge	0.0975349
LTU	MeOH	2024	3.81318	0	none	0	5156.36	0.206254	580.565	barge	0.130047
LTU	MeOH	2050	2.34604	0	none	0	5156.36	0.206254	580.565	barge	0.130047
LTU	NH3	2024	3.25775	0	none	0	5156.36	0.182535	580.565	barge	0.123312
LTU	NH3	2050	2.74175	0	none	0	5156.36	0.182535	580.565	barge	0.123312
LVA	LH2	2024	5.19169	177.409	truck	0.106445	5031.08	0.494555	580.565	barge	0.319311
LVA	LH2	2050	3.08199	177.409	truck	0.106445	5031.08	0.377331	580.565	barge	0.243837
LVA	LOHC	2024	3.9574	177.409	truck	0.138379	5031.08	0.150932	580.565	barge	0.0975349
LVA	LOHC	2050	3.63682	177.409	truck	0.138379	5031.08	0.150932	580.565	barge	0.0975349
LVA	MeOH	2024	3.99273	177.409	truck	0.184505	5031.08	0.201243	580.565	barge	0.130047
LVA	MeOH	2050	2.52558	177.409	truck	0.184505	5031.08	0.201243	580.565	barge	0.130047
LVA	NH3	2024	3.43145	177.409	truck	0.177941	5031.08	0.1781	580.565	barge	0.123312
LVA	NH3	2050	2.91545	177.409	truck	0.177941	5031.08	0.1781	580.565	barge	0.123312
MAC	LH2	2024	6.87485	0	none	0	14034	1.37954	580.565	barge	0.319311
MAC	LH2	2050	3.94863	0	none	0	14034	1.05255	580.565	barge	0.243837
MAC	LOHC	2024	4.10897	0	none	0	14034	0.42102	580.565	barge	0.0975349
MAC	LOHC	2050	3.78177	0	none	0	14034	0.42102	580.565	barge	0.0975349
MAC	MeOH	2024	4.17716	0	none	0	14034	0.56136	580.565	barge	0.130047
MAC	MeOH	2050	2.71002	0	none	0	14034	0.56136	580.565	barge	0.130047
MAC	NH3	2024	3.60476	0	none	0	14034	0.496804	580.565	barge	0.123312
MAC	NH3	2050	3.08876	0	none	0	14034	0.496804	580.565	barge	0.123312
MAR	LH2	2024	4.45909	256.612	truck	0.153967	1105.57	0.108678	580.565	barge	0.319311
MAR	LH2	2050	2.70529	256.612	truck	0.153967	1105.57	0.0829177	580.565	barge	0.243837
MAR	LOHC	2024	3.89276	256.612	truck	0.200157	1105.57	0.0331671	580.565	barge	0.0975349
MAR	LOHC	2050	3.57507	256.612	truck	0.200157	1105.57	0.0331671	580.565	barge	0.0975349
MAR	MeOH	2024	3.91423	256.612	truck	0.266876	1105.57	0.0442228	580.565	barge	0.130047
MAR	MeOH	2050	2.44709	256.612	truck	0.266876	1105.57	0.0442228	580.565	barge	0.130047
MAR	NH3	2024	3.35774	256.612	truck	0.257382	1105.57	0.0391372	580.565	barge	0.123312
MAR	NH3	2050	2.84174	256.612	truck	0.257382	1105.57	0.0391372	580.565	barge	0.123312
MCO	LH2	2024	4.09862	0	none	0	208.157	0.0204618	580.565	barge	0.319311
MCO	LH2	2050	2.44507	0	none	0	208.157	0.0156118	580.565	barge	0.243837
MCO	LOHC	2024	3.66308	0	none	0	208.157	0.00624471	580.565	barge	0.0975349
MCO	LOHC	2050	3.34626	0	none	0	208.157	0.00624471	580.565	barge	0.0975349
MCO	MeOH	2024	3.6103	0	none	0	208.157	0.00832628	580.565	barge	0.130047
MCO	MeOH	2050	2.14316	0	none	0	208.157	0.00832628	580.565	barge	0.130047
MCO	NH3	2024	3.06434	0	none	0	208.157	0.00736876	580.565	barge	0.123312
MCO	NH3	2050	2.54834	0	none	0	208.157	0.00736876	580.565	barge	0.123312
MDA	LH2	2024	4.9822	500.669	truck	0.300401	2856.88	0.280831	580.565	barge	0.319311
MDA	LH2	2050	3.05042	500.669	truck	0.300401	2856.88	0.214266	580.565	barge	0.243837
MDA	LOHC	2024	4.14015	500.669	truck	0.390522	2856.88	0.0857064	580.565	barge	0.0975349
MDA	LOHC	2050	3.82096	500.669	truck	0.390522	2856.88	0.0857064	580.565	barge	0.0975349
MDA	MeOH	2024	4.2401	500.669	truck	0.520696	2856.88	0.114275	580.565	barge	0.130047
MDA	MeOH	2050	2.77296	500.669	truck	0.520696	2856.88	0.114275	580.565	barge	0.130047
MDA	NH3	2024	3.67189	500.669	truck	0.502171	2856.88	0.101134	580.565	barge	0.123312
MDA	NH3	2050	3.15589	500.669	truck	0.502171	2856.88	0.101134	580.565	barge	0.123312
MDG	LH2	2024	6.07676	282.967	truck	0.16978	9069.52	0.891534	580.565	barge	0.319311
MDG	LH2	2050	3.58807	282.967	truck	0.16978	9069.52	0.680214	580.565	barge	0.243837
MDG	LOHC	2024	4.17021	282.967	truck	0.220714	9069.52	0.272086	580.565	barge	0.0975349
MDG	LOHC	2050	3.84653	282.967	truck	0.220714	9069.52	0.272086	580.565	barge	0.0975349
MDG	MeOH	2024	4.26819	282.967	truck	0.294286	9069.52	0.362781	580.565	barge	0.130047
MDG	MeOH	2050	2.80105	282.967	truck	0.294286	9069.52	0.362781	580.565	barge	0.130047
MDG	NH3	2024	3.69557	282.967	truck	0.283816	9069.52	0.321061	580.565	barge	0.123312
MDG	NH3	2050	3.17957	282.967	truck	0.283816	9069.52	0.321061	580.565	barge	0.123312
MDV	LH2	2024	5.62645	0	none	0	7816.89	0.7684	580.565	barge	0.319311
MDV	LH2	2050	3.27252	0	none	0	7816.89	0.586267	580.565	barge	0.243837
MDV	LOHC	2024	3.90847	0	none	0	7816.89	0.234507	580.565	barge	0.0975349
MDV	LOHC	2050	3.58593	0	none	0	7816.89	0.234507	580.565	barge	0.0975349
MDV	MeOH	2024	3.92226	0	none	0	7816.89	0.312676	580.565	barge	0.130047
MDV	MeOH	2050	2.45512	0	none	0	7816.89	0.312676	580.565	barge	0.130047
MDV	NH3	2024	3.36175	0	none	0	7816.89	0.276718	580.565	barge	0.123312
MDV	NH3	2050	2.84575	0	none	0	7816.89	0.276718	580.565	barge	0.123312
MEX	LH2	2024	6.77253	502.323	truck	0.301394	11767.1	1.15671	580.565	barge	0.319311
MEX	LH2	2050	4.02045	502.323	truck	0.301394	11767.1	0.882532	580.565	barge	0.243837
MEX	LOHC	2024	4.4288	502.323	truck	0.391812	11767.1	0.353013	580.565	barge	0.0975349
MEX	LOHC	2050	4.10293	502.323	truck	0.391812	11767.1	0.353013	580.565	barge	0.0975349
MEX	MeOH	2024	4.60714	502.323	truck	0.522416	11767.1	0.470684	580.565	barge	0.130047
MEX	MeOH	2050	3.14	502.323	truck	0.522416	11767.1	0.470684	580.565	barge	0.130047
MEX	NH3	2024	4.02183	502.323	truck	0.50383	11767.1	0.416555	580.565	barge	0.123312
MEX	NH3	2050	3.50583	502.323	truck	0.50383	11767.1	0.416555	580.565	barge	0.123312
MHL	LH2	2024	7.71403	0	none	0	18213.2	1.79036	580.565	barge	0.319311
MHL	LH2	2050	4.40312	0	none	0	18213.2	1.36599	580.565	barge	0.243837
MHL	LOHC	2024	4.24375	0	none	0	18213.2	0.546396	580.565	barge	0.0975349
MHL	LOHC	2050	3.91342	0	none	0	18213.2	0.546396	580.565	barge	0.0975349
MHL	MeOH	2024	4.34851	0	none	0	18213.2	0.728528	580.565	barge	0.130047
MHL	MeOH	2050	2.88137	0	none	0	18213.2	0.728528	580.565	barge	0.130047
MHL	NH3	2024	3.76811	0	none	0	18213.2	0.644747	580.565	barge	0.123312
MHL	NH3	2050	3.25211	0	none	0	18213.2	0.644747	580.565	barge	0.123312
MKD	LH2	2024	4.61663	328.748	truck	0.197249	1637.79	0.160995	580.565	barge	0.319311
MKD	LH2	2050	2.80889	328.748	truck	0.197249	1637.79	0.122834	580.565	barge	0.243837
MKD	LOHC	2024	3.96635	328.748	truck	0.256423	1637.79	0.0491337	580.565	barge	0.0975349
MKD	LOHC	2050	3.64821	328.748	truck	0.256423	1637.79	0.0491337	580.565	barge	0.0975349
MKD	MeOH	2024	4.01115	328.748	truck	0.341898	1637.79	0.0655116	580.565	barge	0.130047
MKD	MeOH	2050	2.544	328.748	truck	0.341898	1637.79	0.0655116	580.565	barge	0.130047
MKD	NH3	2024	3.45117	328.748	truck	0.329734	1637.79	0.0579778	580.565	barge	0.123312
MKD	NH3	2050	2.93517	328.748	truck	0.329734	1637.79	0.0579778	580.565	barge	0.123312
MLI	LH2	2024	5.59941	855.068	truck	0.513041	4690.79	0.461105	580.565	barge	0.319311
MLI	LH2	2050	3.47445	855.068	truck	0.513041	4690.79	0.351809	580.565	barge	0.243837
MLI	LOHC	2024	4.47653	855.068	truck	0.666953	4690.79	0.140724	580.565	barge	0.0975349
MLI	LOHC	2050	4.1557	855.068	truck	0.666953	4690.79	0.140724	580.565	barge	0.0975349
MLI	MeOH	2024	4.68422	855.068	truck	0.889271	4690.79	0.187632	580.565	barge	0.130047
MLI	MeOH	2050	3.21708	855.068	truck	0.889271	4690.79	0.187632	580.565	barge	0.130047
MLI	NH3	2024	4.10034	855.068	truck	0.857633	4690.79	0.166054	580.565	barge	0.123312
MLI	NH3	2050	3.58434	855.068	truck	0.857633	4690.79	0.166054	580.565	barge	0.123312
MLT	LH2	2024	4.23856	0	none	0	905.094	0.0889707	580.565	barge	0.319311
MLT	LH2	2050	2.52086	0	none	0	905.094	0.067882	580.565	barge	0.243837
MLT	LOHC	2024	3.68556	0	none	0	905.094	0.0271528	580.565	barge	0.0975349
MLT	LOHC	2050	3.36821	0	none	0	905.094	0.0271528	580.565	barge	0.0975349
MLT	MeOH	2024	3.63888	0	none	0	905.094	0.0362038	580.565	barge	0.130047
MLT	MeOH	2050	2.17174	0	none	0	905.094	0.0362038	580.565	barge	0.130047
MLT	NH3	2024	3.09158	0	none	0	905.094	0.0320403	580.565	barge	0.123312
MLT	NH3	2050	2.57558	0	none	0	905.094	0.0320403	580.565	barge	0.123312
MMR	LH2	2024	6.9475	1371.81	rail	0.685905	10279.7	1.01049	580.565	barge	0.319311
MMR	LH2	2050	3.99819	1371.81	rail	0.411543	10279.7	0.770977	580.565	barge	0.243837
MMR	LOHC	2024	4.12267	1371.81	rail	0.131694	10279.7	0.308391	580.565	barge	0.0975349
MMR	LOHC	2050	3.79726	1371.81	rail	0.131694	10279.7	0.308391	580.565	barge	0.0975349
MMR	MeOH	2024	4.2002	1371.81	rail	0.175592	10279.7	0.411188	580.565	barge	0.130047
MMR	MeOH	2050	2.73306	1371.81	rail	0.175592	10279.7	0.411188	580.565	barge	0.130047
MMR	NH3	2024	3.63304	1371.81	rail	0.169967	10279.7	0.363901	580.565	barge	0.123312
MMR	NH3	2050	3.11704	1371.81	rail	0.169967	10279.7	0.363901	580.565	barge	0.123312
MNE	LH2	2024	4.4231	52.8292	truck	0.0316975	1639.28	0.161141	580.565	barge	0.319311
MNE	LH2	2050	2.63418	52.8292	truck	0.0316975	1639.28	0.122946	580.565	barge	0.243837
MNE	LOHC	2024	3.75056	52.8292	truck	0.0412068	1639.28	0.0491784	580.565	barge	0.0975349
MNE	LOHC	2050	3.43262	52.8292	truck	0.0412068	1639.28	0.0491784	580.565	barge	0.0975349
MNE	MeOH	2024	3.72398	52.8292	truck	0.0549424	1639.28	0.0655712	580.565	barge	0.130047
MNE	MeOH	2050	2.25683	52.8292	truck	0.0549424	1639.28	0.0655712	580.565	barge	0.130047
MNE	NH3	2024	3.17346	52.8292	truck	0.0529877	1639.28	0.0580305	580.565	barge	0.123312
MNE	NH3	2050	2.65746	52.8292	truck	0.0529877	1639.28	0.0580305	580.565	barge	0.123312
MNG	LH2	2024	8.871	2849.43	rail	1.42471	15425.3	1.51631	580.565	barge	0.319311
MNG	LH2	2050	5.05093	2849.43	rail	0.854829	15425.3	1.1569	580.565	barge	0.243837
MNG	LOHC	2024	4.43379	2849.43	rail	0.273545	15425.3	0.462759	580.565	barge	0.0975349
MNG	LOHC	2050	4.10342	2849.43	rail	0.273545	15425.3	0.462759	580.565	barge	0.0975349
MNG	MeOH	2024	4.60178	2849.43	rail	0.364727	15425.3	0.617012	580.565	barge	0.130047
MNG	MeOH	2050	3.13464	2849.43	rail	0.364727	15425.3	0.617012	580.565	barge	0.130047
MNG	NH3	2024	4.02269	2849.43	rail	0.353044	15425.3	0.546056	580.565	barge	0.123312
MNG	NH3	2050	3.50669	2849.43	rail	0.353044	15425.3	0.546056	580.565	barge	0.123312
MNP	LH2	2024	7.25012	0	none	0	15902.9	1.56326	580.565	barge	0.319311
MNP	LH2	2050	4.15187	0	none	0	15902.9	1.19272	580.565	barge	0.243837
MNP	LOHC	2024	4.16924	0	none	0	15902.9	0.477087	580.565	barge	0.0975349
MNP	LOHC	2050	3.84064	0	none	0	15902.9	0.477087	580.565	barge	0.0975349
MNP	MeOH	2024	4.25379	0	none	0	15902.9	0.636116	580.565	barge	0.130047
MNP	MeOH	2050	2.78665	0	none	0	15902.9	0.636116	580.565	barge	0.130047
MNP	NH3	2024	3.67781	0	none	0	15902.9	0.562963	580.565	barge	0.123312
MNP	NH3	2050	3.16181	0	none	0	15902.9	0.562963	580.565	barge	0.123312
MOZ	LH2	2024	6.24745	100.083	truck	0.0600498	10559.4	1.03799	580.565	barge	0.319311
MOZ	LH2	2050	3.63419	100.083	truck	0.0600498	10559.4	0.791955	580.565	barge	0.243837
MOZ	LOHC	2024	4.0752	100.083	truck	0.0780647	10559.4	0.316782	580.565	barge	0.0975349
MOZ	LOHC	2050	3.75054	100.083	truck	0.0780647	10559.4	0.316782	580.565	barge	0.0975349
MOZ	MeOH	2024	4.13889	100.083	truck	0.104086	10559.4	0.422376	580.565	barge	0.130047
MOZ	MeOH	2050	2.67175	100.083	truck	0.104086	10559.4	0.422376	580.565	barge	0.130047
MOZ	NH3	2024	3.5697	100.083	truck	0.100383	10559.4	0.373803	580.565	barge	0.123312
MOZ	NH3	2050	3.0537	100.083	truck	0.100383	10559.4	0.373803	580.565	barge	0.123312
MRT	LH2	2024	5.02918	502.921	truck	0.301753	3082.98	0.303057	580.565	barge	0.319311
MRT	LH2	2050	3.07643	502.921	truck	0.301753	3082.98	0.231223	580.565	barge	0.243837
MRT	LOHC	2024	4.14921	502.921	truck	0.392278	3082.98	0.0924894	580.565	barge	0.0975349
MRT	LOHC	2050	3.82985	502.921	truck	0.392278	3082.98	0.0924894	580.565	barge	0.0975349
MRT	MeOH	2024	4.25171	502.921	truck	0.523038	3082.98	0.123319	580.565	barge	0.130047
MRT	MeOH	2050	2.78457	502.921	truck	0.523038	3082.98	0.123319	580.565	barge	0.130047
MRT	NH3	2024	3.68299	502.921	truck	0.50443	3082.98	0.109137	580.565	barge	0.123312
MRT	NH3	2050	3.16699	502.921	truck	0.50443	3082.98	0.109137	580.565	barge	0.123312
MSR	LH2	2024	5.4112	0	none	0	6744.94	0.663028	580.565	barge	0.319311
MSR	LH2	2050	3.15594	0	none	0	6744.94	0.50587	580.565	barge	0.243837
MSR	LOHC	2024	3.87389	0	none	0	6744.94	0.202348	580.565	barge	0.0975349
MSR	LOHC	2050	3.55217	0	none	0	6744.94	0.202348	580.565	barge	0.0975349
MSR	MeOH	2024	3.87831	0	none	0	6744.94	0.269798	580.565	barge	0.130047
MSR	MeOH	2050	2.41117	0	none	0	6744.94	0.269798	580.565	barge	0.130047
MSR	NH3	2024	3.31985	0	none	0	6744.94	0.238771	580.565	barge	0.123312
MSR	NH3	2050	2.80385	0	none	0	6744.94	0.238771	580.565	barge	0.123312
MTQ	LH2	2024	5.41176	0	none	0	6747.74	0.663303	580.565	barge	0.319311
MTQ	LH2	2050	3.15625	0	none	0	6747.74	0.50608	580.565	barge	0.243837
MTQ	LOHC	2024	3.87399	0	none	0	6747.74	0.202432	580.565	barge	0.0975349
MTQ	LOHC	2050	3.55225	0	none	0	6747.74	0.202432	580.565	barge	0.0975349
MTQ	MeOH	2024	3.87843	0	none	0	6747.74	0.26991	580.565	barge	0.130047
MTQ	MeOH	2050	2.41128	0	none	0	6747.74	0.26991	580.565	barge	0.130047
MTQ	NH3	2024	3.31996	0	none	0	6747.74	0.23887	580.565	barge	0.123312
MTQ	NH3	2050	2.80396	0	none	0	6747.74	0.23887	580.565	barge	0.123312
MUS	LH2	2024	5.97602	0	none	0	9557.77	0.939529	580.565	barge	0.319311
MUS	LH2	2050	3.46184	0	none	0	9557.77	0.716833	580.565	barge	0.243837
MUS	LOHC	2024	3.96461	0	none	0	9557.77	0.286733	580.565	barge	0.0975349
MUS	LOHC	2050	3.64077	0	none	0	9557.77	0.286733	580.565	barge	0.0975349
MUS	MeOH	2024	3.99364	0	none	0	9557.77	0.382311	580.565	barge	0.130047
MUS	MeOH	2050	2.5265	0	none	0	9557.77	0.382311	580.565	barge	0.130047
MUS	NH3	2024	3.42979	0	none	0	9557.77	0.338345	580.565	barge	0.123312
MUS	NH3	2050	2.91379	0	none	0	9557.77	0.338345	580.565	barge	0.123312
MWI	LH2	2024	6.68469	1680	rail	0.84	8046.18	0.790939	580.565	barge	0.319311
MWI	LH2	2050	3.85815	1680	rail	0.504	8046.18	0.603463	580.565	barge	0.243837
MWI	LOHC	2024	4.08092	1680	rail	0.16128	8046.18	0.241385	580.565	barge	0.0975349
MWI	LOHC	2050	3.75695	1680	rail	0.16128	8046.18	0.241385	580.565	barge	0.0975349
MWI	MeOH	2024	4.14838	1680	rail	0.21504	8046.18	0.321847	580.565	barge	0.130047
MWI	MeOH	2050	2.68124	1680	rail	0.21504	8046.18	0.321847	580.565	barge	0.130047
MWI	NH3	2024	3.58505	1680	rail	0.208152	8046.18	0.284835	580.565	barge	0.123312
MWI	NH3	2050	3.06905	1680	rail	0.208152	8046.18	0.284835	580.565	barge	0.123312
MYS	LH2	2024	6.24249	65.1127	truck	0.0390676	10657	1.04758	580.565	barge	0.319311
MYS	LH2	2050	3.62265	65.1127	truck	0.0390676	10657	0.799275	580.565	barge	0.243837
MYS	LOHC	2024	4.05099	65.1127	truck	0.0507879	10657	0.31971	580.565	barge	0.0975349
MYS	LOHC	2050	3.72628	65.1127	truck	0.0507879	10657	0.31971	580.565	barge	0.0975349
MYS	MeOH	2024	4.10649	65.1127	truck	0.0677172	10657	0.42628	580.565	barge	0.130047
MYS	MeOH	2050	2.63935	65.1127	truck	0.0677172	10657	0.42628	580.565	barge	0.130047
MYS	NH3	2024	3.53831	65.1127	truck	0.065308	10657	0.377258	580.565	barge	0.123312
MYS	NH3	2050	3.02231	65.1127	truck	0.065308	10657	0.377258	580.565	barge	0.123312
MYT	LH2	2024	5.78204	0	none	0	8591.76	0.84457	580.565	barge	0.319311
MYT	LH2	2050	3.35679	0	none	0	8591.76	0.644382	580.565	barge	0.243837
MYT	LOHC	2024	3.93345	0	none	0	8591.76	0.257753	580.565	barge	0.0975349
MYT	LOHC	2050	3.61034	0	none	0	8591.76	0.257753	580.565	barge	0.0975349
MYT	MeOH	2024	3.95403	0	none	0	8591.76	0.34367	580.565	barge	0.130047
MYT	MeOH	2050	2.48689	0	none	0	8591.76	0.34367	580.565	barge	0.130047
MYT	NH3	2024	3.39203	0	none	0	8591.76	0.304148	580.565	barge	0.123312
MYT	NH3	2050	2.87603	0	none	0	8591.76	0.304148	580.565	barge	0.123312
NAM	LH2	2024	6.22629	333.884	truck	0.20033	9636.06	0.947225	580.565	barge	0.319311
NAM	LH2	2050	3.68195	333.884	truck	0.20033	9636.06	0.722704	580.565	barge	0.243837
NAM	LOHC	2024	4.22831	333.884	truck	0.26043	9636.06	0.289082	580.565	barge	0.0975349
NAM	LOHC	2050	3.90417	333.884	truck	0.26043	9636.06	0.289082	580.565	barge	0.0975349
NAM	MeOH	2024	4.34442	333.884	truck	0.347239	9636.06	0.385442	580.565	barge	0.130047
NAM	MeOH	2050	2.87728	333.884	truck	0.347239	9636.06	0.385442	580.565	barge	0.130047
NAM	NH3	2024	3.76897	333.884	truck	0.334886	9636.06	0.341117	580.565	barge	0.123312
NAM	NH3	2050	3.25297	333.884	truck	0.334886	9636.06	0.341117	580.565	barge	0.123312
NCL	LH2	2024	7.83418	141.624	truck	0.0849744	18316.1	1.80047	580.565	barge	0.319311
NCL	LH2	2050	4.50406	141.624	truck	0.0849744	18316.1	1.37371	580.565	barge	0.243837
NCL	LOHC	2024	4.35785	141.624	truck	0.110467	18316.1	0.549483	580.565	barge	0.0975349
NCL	LOHC	2050	4.02734	141.624	truck	0.110467	18316.1	0.549483	580.565	barge	0.0975349
NCL	MeOH	2024	4.50016	141.624	truck	0.147289	18316.1	0.732644	580.565	barge	0.130047
NCL	MeOH	2050	3.03302	141.624	truck	0.147289	18316.1	0.732644	580.565	barge	0.130047
NCL	NH3	2024	3.9147	141.624	truck	0.142049	18316.1	0.64839	580.565	barge	0.123312
NCL	NH3	2050	3.3987	141.624	truck	0.142049	18316.1	0.64839	580.565	barge	0.123312
NER	LH2	2024	6.0209	1016.28	rail	0.50814	6731.94	0.66175	580.565	barge	0.319311
NER	LH2	2050	3.49371	1016.28	rail	0.304884	6731.94	0.504895	580.565	barge	0.243837
NER	LOHC	2024	3.97333	1016.28	rail	0.0975629	6731.94	0.201958	580.565	barge	0.0975349
NER	LOHC	2050	3.65084	1016.28	rail	0.0975629	6731.94	0.201958	580.565	barge	0.0975349
NER	MeOH	2024	4.00888	1016.28	rail	0.130084	6731.94	0.269278	580.565	barge	0.130047
NER	MeOH	2050	2.54174	1016.28	rail	0.130084	6731.94	0.269278	580.565	barge	0.130047
NER	NH3	2024	3.449	1016.28	rail	0.125917	6731.94	0.238311	580.565	barge	0.123312
NER	NH3	2050	2.933	1016.28	rail	0.125917	6731.94	0.238311	580.565	barge	0.123312
NFK	LH2	2024	7.83204	0	none	0	18800.9	1.84813	580.565	barge	0.319311
NFK	LH2	2050	4.46703	0	none	0	18800.9	1.41007	580.565	barge	0.243837
NFK	LOHC	2024	4.2627	0	none	0	18800.9	0.564027	580.565	barge	0.0975349
NFK	LOHC	2050	3.93193	0	none	0	18800.9	0.564027	580.565	barge	0.0975349
NFK	MeOH	2024	4.37261	0	none	0	18800.9	0.752036	580.565	barge	0.130047
NFK	MeOH	2050	2.90546	0	none	0	18800.9	0.752036	580.565	barge	0.130047
NFK	NH3	2024	3.79108	0	none	0	18800.9	0.665552	580.565	barge	0.123312
NFK	NH3	2050	3.27508	0	none	0	18800.9	0.665552	580.565	barge	0.123312
NGA	LH2	2024	5.9037	666.865	truck	0.400119	6864.6	0.67479	580.565	barge	0.319311
NGA	LH2	2050	3.59158	666.865	truck	0.400119	6864.6	0.514845	580.565	barge	0.243837
NGA	LOHC	2024	4.39941	666.865	truck	0.520155	6864.6	0.205938	580.565	barge	0.0975349
NGA	LOHC	2050	4.07709	666.865	truck	0.520155	6864.6	0.205938	580.565	barge	0.0975349
NGA	MeOH	2024	4.57743	666.865	truck	0.69354	6864.6	0.274584	580.565	barge	0.130047
NGA	MeOH	2050	3.11028	666.865	truck	0.69354	6864.6	0.274584	580.565	barge	0.130047
NGA	NH3	2024	3.99585	666.865	truck	0.668866	6864.6	0.243007	580.565	barge	0.123312
NGA	NH3	2050	3.47985	666.865	truck	0.668866	6864.6	0.243007	580.565	barge	0.123312
NIC	LH2	2024	6.19201	486.279	truck	0.291767	8932.17	0.878032	580.565	barge	0.319311
NIC	LH2	2050	3.70198	486.279	truck	0.291767	8932.17	0.669913	580.565	barge	0.243837
NIC	LOHC	2024	4.32482	486.279	truck	0.379298	8932.17	0.267965	580.565	barge	0.0975349
NIC	LOHC	2050	4.00109	486.279	truck	0.379298	8932.17	0.267965	580.565	barge	0.0975349
NIC	MeOH	2024	4.47421	486.279	truck	0.50573	8932.17	0.357287	580.565	barge	0.130047
NIC	MeOH	2050	3.00706	486.279	truck	0.50573	8932.17	0.357287	580.565	barge	0.130047
NIC	NH3	2024	3.89487	486.279	truck	0.487738	8932.17	0.316199	580.565	barge	0.123312
NIC	NH3	2050	3.37887	486.279	truck	0.487738	8932.17	0.316199	580.565	barge	0.123312
NIU	LH2	2024	7.89445	0	none	0	19111.7	1.87868	580.565	barge	0.319311
NIU	LH2	2050	4.50083	0	none	0	19111.7	1.43338	580.565	barge	0.243837
NIU	LOHC	2024	4.27272	0	none	0	19111.7	0.573351	580.565	barge	0.0975349
NIU	LOHC	2050	3.94172	0	none	0	19111.7	0.573351	580.565	barge	0.0975349
NIU	MeOH	2024	4.38535	0	none	0	19111.7	0.764468	580.565	barge	0.130047
NIU	MeOH	2050	2.91821	0	none	0	19111.7	0.764468	580.565	barge	0.130047
NIU	NH3	2024	3.80323	0	none	0	19111.7	0.676554	580.565	barge	0.123312
NIU	NH3	2050	3.28723	0	none	0	19111.7	0.676554	580.565	barge	0.123312
NLD	LH2	2024	4.86841	167.409	truck	0.100445	3456.11	0.339736	580.565	barge	0.319311
NLD	LH2	2050	2.90438	167.409	truck	0.100445	3456.11	0.259208	580.565	barge	0.243837
NLD	LOHC	2024	3.89879	167.409	truck	0.130579	3456.11	0.103683	580.565	barge	0.0975349
NLD	LOHC	2050	3.5794	167.409	truck	0.130579	3456.11	0.103683	580.565	barge	0.0975349
NLD	MeOH	2024	3.91774	167.409	truck	0.174105	3456.11	0.138244	580.565	barge	0.130047
NLD	MeOH	2050	2.4506	167.409	truck	0.174105	3456.11	0.138244	580.565	barge	0.130047
NLD	NH3	2024	3.35982	167.409	truck	0.167911	3456.11	0.122346	580.565	barge	0.123312
NLD	NH3	2050	2.84382	167.409	truck	0.167911	3456.11	0.122346	580.565	barge	0.123312
NOR	LH2	2024	4.94207	53.5563	truck	0.0321338	4221.27	0.414951	580.565	barge	0.319311
NOR	LH2	2050	2.91544	53.5563	truck	0.0321338	4221.27	0.316595	580.565	barge	0.243837
NOR	LOHC	2024	3.8344	53.5563	truck	0.0417739	4221.27	0.126638	580.565	barge	0.0975349
NOR	LOHC	2050	3.51452	53.5563	truck	0.0417739	4221.27	0.126638	580.565	barge	0.0975349
NOR	MeOH	2024	3.83059	53.5563	truck	0.0556986	4221.27	0.168851	580.565	barge	0.130047
NOR	MeOH	2050	2.36345	53.5563	truck	0.0556986	4221.27	0.168851	580.565	barge	0.130047
NOR	NH3	2024	3.27512	53.5563	truck	0.053717	4221.27	0.149433	580.565	barge	0.123312
NOR	NH3	2050	2.75912	53.5563	truck	0.053717	4221.27	0.149433	580.565	barge	0.123312
NPL	LH2	2024	7.18868	1661.77	rail	0.830885	10610.8	1.04304	580.565	barge	0.319311
NPL	LH2	2050	4.13097	1661.77	rail	0.498531	10610.8	0.79581	580.565	barge	0.243837
NPL	LOHC	2024	4.16184	1661.77	rail	0.15953	10610.8	0.318324	580.565	barge	0.0975349
NPL	LOHC	2050	3.83596	1661.77	rail	0.15953	10610.8	0.318324	580.565	barge	0.0975349
NPL	MeOH	2024	4.25118	1661.77	rail	0.212707	10610.8	0.424432	580.565	barge	0.130047
NPL	MeOH	2050	2.78404	1661.77	rail	0.212707	10610.8	0.424432	580.565	barge	0.130047
NPL	NH3	2024	3.68297	1661.77	rail	0.205893	10610.8	0.375622	580.565	barge	0.123312
NPL	NH3	2050	3.16697	1661.77	rail	0.205893	10610.8	0.375622	580.565	barge	0.123312
NRU	LH2	2024	7.67112	0	none	0	17999.5	1.76935	580.565	barge	0.319311
NRU	LH2	2050	4.37988	0	none	0	17999.5	1.34996	580.565	barge	0.243837
NRU	LOHC	2024	4.23685	0	none	0	17999.5	0.539985	580.565	barge	0.0975349
NRU	LOHC	2050	3.90668	0	none	0	17999.5	0.539985	580.565	barge	0.0975349
NRU	MeOH	2024	4.33975	0	none	0	17999.5	0.71998	580.565	barge	0.130047
NRU	MeOH	2050	2.87261	0	none	0	17999.5	0.71998	580.565	barge	0.130047
NRU	NH3	2024	3.75976	0	none	0	17999.5	0.637182	580.565	barge	0.123312
NRU	NH3	2050	3.24376	0	none	0	17999.5	0.637182	580.565	barge	0.123312
NZL	LH2	2024	8.45592	597.184	truck	0.35831	19818.6	1.94817	580.565	barge	0.319311
NZL	LH2	2050	4.95617	597.184	truck	0.35831	19818.6	1.48639	580.565	barge	0.243837
NZL	LOHC	2024	4.76267	597.184	truck	0.465804	19818.6	0.594558	580.565	barge	0.0975349
NZL	LOHC	2050	4.43069	597.184	truck	0.465804	19818.6	0.594558	580.565	barge	0.0975349
NZL	MeOH	2024	5.036	597.184	truck	0.621071	19818.6	0.792744	580.565	barge	0.130047
NZL	MeOH	2050	3.56886	597.184	truck	0.621071	19818.6	0.792744	580.565	barge	0.130047
NZL	NH3	2024	4.43204	597.184	truck	0.598976	19818.6	0.701578	580.565	barge	0.123312
NZL	NH3	2050	3.91604	597.184	truck	0.598976	19818.6	0.701578	580.565	barge	0.123312
OMN	LH2	2024	5.86731	1053.12	rail	0.52656	5856.53	0.575697	580.565	barge	0.319311
OMN	LH2	2050	3.41081	1053.12	rail	0.315936	5856.53	0.43924	580.565	barge	0.243837
OMN	LOHC	2024	3.94871	1053.12	rail	0.1011	5856.53	0.175696	580.565	barge	0.0975349
OMN	LOHC	2050	3.62686	1053.12	rail	0.1011	5856.53	0.175696	580.565	barge	0.0975349
OMN	MeOH	2024	3.97774	1053.12	rail	0.134799	5856.53	0.234261	580.565	barge	0.130047
OMN	MeOH	2050	2.5106	1053.12	rail	0.134799	5856.53	0.234261	580.565	barge	0.130047
OMN	NH3	2024	3.41948	1053.12	rail	0.130482	5856.53	0.207321	580.565	barge	0.123312
OMN	NH3	2050	2.90348	1053.12	rail	0.130482	5856.53	0.207321	580.565	barge	0.123312
PAK	LH2	2024	6.48108	1448.99	rail	0.724495	7725.33	0.7594	580.565	barge	0.319311
PAK	LH2	2050	3.74616	1448.99	rail	0.434697	7725.33	0.5794	580.565	barge	0.243837
PAK	LOHC	2024	4.04788	1448.99	rail	0.139103	7725.33	0.23176	580.565	barge	0.0975349
PAK	LOHC	2050	3.72432	1448.99	rail	0.139103	7725.33	0.23176	580.565	barge	0.0975349
PAK	MeOH	2024	4.10543	1448.99	rail	0.185471	7725.33	0.309013	580.565	barge	0.130047
PAK	MeOH	2050	2.63829	1448.99	rail	0.185471	7725.33	0.309013	580.565	barge	0.130047
PAK	NH3	2024	3.54304	1448.99	rail	0.17953	7725.33	0.273477	580.565	barge	0.123312
PAK	NH3	2050	3.02704	1448.99	rail	0.17953	7725.33	0.273477	580.565	barge	0.123312
PAN	LH2	2024	5.86843	56.3553	truck	0.0338132	8824.82	0.86748	580.565	barge	0.319311
PAN	LH2	2050	3.41785	56.3553	truck	0.0338132	8824.82	0.661861	580.565	barge	0.243837
PAN	LOHC	2024	3.98505	56.3553	truck	0.0439571	8824.82	0.264745	580.565	barge	0.0975349
PAN	LOHC	2050	3.66172	56.3553	truck	0.0439571	8824.82	0.264745	580.565	barge	0.0975349
PAN	MeOH	2024	4.02225	56.3553	truck	0.0586095	8824.82	0.352993	580.565	barge	0.130047
PAN	MeOH	2050	2.55511	56.3553	truck	0.0586095	8824.82	0.352993	580.565	barge	0.130047
PAN	NH3	2024	3.45788	56.3553	truck	0.0565244	8824.82	0.312399	580.565	barge	0.123312
PAN	NH3	2050	2.94188	56.3553	truck	0.0565244	8824.82	0.312399	580.565	barge	0.123312
PER	LH2	2024	6.89701	974.436	truck	0.584662	10735.3	1.05528	580.565	barge	0.319311
PER	LH2	2050	4.20744	974.436	truck	0.584662	10735.3	0.805147	580.565	barge	0.243837
PER	LOHC	2024	4.76484	974.436	truck	0.76006	10735.3	0.322059	580.565	barge	0.0975349
PER	LOHC	2050	4.43938	974.436	truck	0.76006	10735.3	0.322059	580.565	barge	0.0975349
PER	MeOH	2024	5.05631	974.436	truck	1.01341	10735.3	0.429412	580.565	barge	0.130047
PER	MeOH	2050	3.58916	974.436	truck	1.01341	10735.3	0.429412	580.565	barge	0.130047
PER	NH3	2024	4.45677	974.436	truck	0.977359	10735.3	0.38003	580.565	barge	0.123312
PER	NH3	2050	3.94077	974.436	truck	0.977359	10735.3	0.38003	580.565	barge	0.123312
PHL	LH2	2024	6.9519	230.425	truck	0.138255	13611.6	1.33802	580.565	barge	0.319311
PHL	LH2	2050	4.04872	230.425	truck	0.138255	13611.6	1.02087	580.565	barge	0.243837
PHL	LOHC	2024	4.27559	230.425	truck	0.179731	13611.6	0.408348	580.565	barge	0.0975349
PHL	LOHC	2050	3.94854	230.425	truck	0.179731	13611.6	0.408348	580.565	barge	0.0975349
PHL	MeOH	2024	4.39972	230.425	truck	0.239642	13611.6	0.544464	580.565	barge	0.130047
PHL	MeOH	2050	2.93258	230.425	truck	0.239642	13611.6	0.544464	580.565	barge	0.130047
PHL	NH3	2024	3.82021	230.425	truck	0.231116	13611.6	0.481851	580.565	barge	0.123312
PHL	NH3	2050	3.30421	230.425	truck	0.231116	13611.6	0.481851	580.565	barge	0.123312
PLW	LH2	2024	6.98406	0	none	0	14577.9	1.43301	580.565	barge	0.319311
PLW	LH2	2050	4.00778	0	none	0	14577.9	1.09334	580.565	barge	0.243837
PLW	LOHC	2024	4.12651	0	none	0	14577.9	0.437337	580.565	barge	0.0975349
PLW	LOHC	2050	3.7989	0	none	0	14577.9	0.437337	580.565	barge	0.0975349
PLW	MeOH	2024	4.19946	0	none	0	14577.9	0.583116	580.565	barge	0.130047
PLW	MeOH	2050	2.73232	0	none	0	14577.9	0.583116	580.565	barge	0.130047
PLW	NH3	2024	3.62602	0	none	0	14577.9	0.516058	580.565	barge	0.123312
PLW	NH3	2050	3.11002	0	none	0	14577.9	0.516058	580.565	barge	0.123312
PNG	LH2	2024	7.24556	0	none	0	15880.2	1.56102	580.565	barge	0.319311
PNG	LH2	2050	4.1494	0	none	0	15880.2	1.19101	580.565	barge	0.243837
PNG	LOHC	2024	4.16851	0	none	0	15880.2	0.476406	580.565	barge	0.0975349
PNG	LOHC	2050	3.83993	0	none	0	15880.2	0.476406	580.565	barge	0.0975349
PNG	MeOH	2024	4.25286	0	none	0	15880.2	0.635208	580.565	barge	0.130047
PNG	MeOH	2050	2.78572	0	none	0	15880.2	0.635208	580.565	barge	0.130047
PNG	NH3	2024	3.67692	0	none	0	15880.2	0.562159	580.565	barge	0.123312
PNG	NH3	2050	3.16092	0	none	0	15880.2	0.562159	580.565	barge	0.123312
POL	LH2	2024	5.37712	446.346	truck	0.267808	5013.64	0.492841	580.565	barge	0.319311
POL	LH2	2050	3.25054	446.346	truck	0.267808	5013.64	0.376023	580.565	barge	0.243837
POL	LOHC	2024	4.16721	446.346	truck	0.34815	5013.64	0.150409	580.565	barge	0.0975349
POL	LOHC	2050	3.84645	446.346	truck	0.34815	5013.64	0.150409	580.565	barge	0.0975349
POL	MeOH	2024	4.27198	446.346	truck	0.4642	5013.64	0.200546	580.565	barge	0.130047
POL	MeOH	2050	2.80483	446.346	truck	0.4642	5013.64	0.200546	580.565	barge	0.130047
POL	NH3	2024	3.7015	446.346	truck	0.447685	5013.64	0.177483	580.565	barge	0.123312
POL	NH3	2050	3.1855	446.346	truck	0.447685	5013.64	0.177483	580.565	barge	0.123312
PRI	LH2	2024	5.45433	0	none	0	6959.7	0.684139	580.565	barge	0.319311
PRI	LH2	2050	3.1793	0	none	0	6959.7	0.521977	580.565	barge	0.243837
PRI	LOHC	2024	3.88082	0	none	0	6959.7	0.208791	580.565	barge	0.0975349
PRI	LOHC	2050	3.55893	0	none	0	6959.7	0.208791	580.565	barge	0.0975349
PRI	MeOH	2024	3.88712	0	none	0	6959.7	0.278388	580.565	barge	0.130047
PRI	MeOH	2050	2.41997	0	none	0	6959.7	0.278388	580.565	barge	0.130047
PRI	NH3	2024	3.32824	0	none	0	6959.7	0.246373	580.565	barge	0.123312
PRI	NH3	2050	2.81224	0	none	0	6959.7	0.246373	580.565	barge	0.123312
PRK	LH2	2024	7.81406	528.553	truck	0.317132	16862.2	1.65755	580.565	barge	0.319311
PRK	LH2	2050	4.59117	528.553	truck	0.317132	16862.2	1.26466	580.565	barge	0.243837
PRK	LOHC	2024	4.61364	528.553	truck	0.412271	16862.2	0.505866	580.565	barge	0.0975349
PRK	LOHC	2050	4.28392	528.553	truck	0.412271	16862.2	0.505866	580.565	barge	0.0975349
PRK	MeOH	2024	4.84334	528.553	truck	0.549695	16862.2	0.674488	580.565	barge	0.130047
PRK	MeOH	2050	3.3762	528.553	truck	0.549695	16862.2	0.674488	580.565	barge	0.130047
PRK	NH3	2024	4.24739	528.553	truck	0.530139	16862.2	0.596922	580.565	barge	0.123312
PRK	NH3	2050	3.73139	528.553	truck	0.530139	16862.2	0.596922	580.565	barge	0.123312
PRT	LH2	2024	4.40595	2.41421	truck	0.00144853	1730.26	0.170085	580.565	barge	0.319311
PRT	LH2	2050	2.61213	2.41421	truck	0.00144853	1730.26	0.12977	580.565	barge	0.243837
PRT	LOHC	2024	3.71406	2.41421	truck	0.00188308	1730.26	0.0519078	580.565	barge	0.0975349
PRT	LOHC	2050	3.39609	2.41421	truck	0.00188308	1730.26	0.0519078	580.565	barge	0.0975349
PRT	MeOH	2024	3.67522	2.41421	truck	0.00251078	1730.26	0.0692104	580.565	barge	0.130047
PRT	MeOH	2050	2.20808	2.41421	truck	0.00251078	1730.26	0.0692104	580.565	barge	0.130047
PRT	NH3	2024	3.12626	2.41421	truck	0.00242145	1730.26	0.0612512	580.565	barge	0.123312
PRT	NH3	2050	2.61026	2.41421	truck	0.00242145	1730.26	0.0612512	580.565	barge	0.123312
PRY	LH2	2024	7.23508	1349.67	rail	0.674835	11778.3	1.15781	580.565	barge	0.319311
PRY	LH2	2050	4.15377	1349.67	rail	0.404901	11778.3	0.883372	580.565	barge	0.243837
PRY	LOHC	2024	4.16883	1349.67	rail	0.129568	11778.3	0.353349	580.565	barge	0.0975349
PRY	LOHC	2050	3.84231	1349.67	rail	0.129568	11778.3	0.353349	580.565	barge	0.0975349
PRY	MeOH	2024	4.25879	1349.67	rail	0.172758	11778.3	0.471132	580.565	barge	0.130047
PRY	MeOH	2050	2.79164	1349.67	rail	0.172758	11778.3	0.471132	580.565	barge	0.130047
PRY	NH3	2024	3.68879	1349.67	rail	0.167224	11778.3	0.416952	580.565	barge	0.123312
PRY	NH3	2050	3.17279	1349.67	rail	0.167224	11778.3	0.416952	580.565	barge	0.123312
PSE	LH2	2024	4.51017	0	none	0	2257.74	0.221936	580.565	barge	0.319311
PSE	LH2	2050	2.66796	0	none	0	2257.74	0.16933	580.565	barge	0.243837
PSE	LOHC	2024	3.72918	0	none	0	2257.74	0.0677322	580.565	barge	0.0975349
PSE	LOHC	2050	3.41082	0	none	0	2257.74	0.0677322	580.565	barge	0.0975349
PSE	MeOH	2024	3.69434	0	none	0	2257.74	0.0903096	580.565	barge	0.130047
PSE	MeOH	2050	2.22719	0	none	0	2257.74	0.0903096	580.565	barge	0.130047
PSE	NH3	2024	3.14445	0	none	0	2257.74	0.079924	580.565	barge	0.123312
PSE	NH3	2050	2.62845	0	none	0	2257.74	0.079924	580.565	barge	0.123312
PYF	LH2	2024	7.48984	0	none	0	17096.7	1.68061	580.565	barge	0.319311
PYF	LH2	2050	4.2817	0	none	0	17096.7	1.28225	580.565	barge	0.243837
PYF	LOHC	2024	4.20774	0	none	0	17096.7	0.512901	580.565	barge	0.0975349
PYF	LOHC	2050	3.87825	0	none	0	17096.7	0.512901	580.565	barge	0.0975349
PYF	MeOH	2024	4.30273	0	none	0	17096.7	0.683868	580.565	barge	0.130047
PYF	MeOH	2050	2.83559	0	none	0	17096.7	0.683868	580.565	barge	0.130047
PYF	NH3	2024	3.72447	0	none	0	17096.7	0.605223	580.565	barge	0.123312
PYF	NH3	2050	3.20847	0	none	0	17096.7	0.605223	580.565	barge	0.123312
QAT	LH2	2024	5.6855	29.4853	truck	0.0176912	8007.81	0.787168	580.565	barge	0.319311
QAT	LH2	2050	3.31197	29.4853	truck	0.0176912	8007.81	0.600586	580.565	barge	0.243837
QAT	LOHC	2024	3.93769	29.4853	truck	0.0229985	8007.81	0.240234	580.565	barge	0.0975349
QAT	LOHC	2050	3.61499	29.4853	truck	0.0229985	8007.81	0.240234	580.565	barge	0.0975349
QAT	MeOH	2024	3.96078	29.4853	truck	0.0306647	8007.81	0.320312	580.565	barge	0.130047
QAT	MeOH	2050	2.49364	29.4853	truck	0.0306647	8007.81	0.320312	580.565	barge	0.130047
QAT	NH3	2024	3.39889	29.4853	truck	0.0295738	8007.81	0.283476	580.565	barge	0.123312
QAT	NH3	2050	2.88289	29.4853	truck	0.0295738	8007.81	0.283476	580.565	barge	0.123312
REU	LH2	2024	5.98055	0	none	0	9580.35	0.941748	580.565	barge	0.319311
REU	LH2	2050	3.46429	0	none	0	9580.35	0.718526	580.565	barge	0.243837
REU	LOHC	2024	3.96534	0	none	0	9580.35	0.287411	580.565	barge	0.0975349
REU	LOHC	2050	3.64148	0	none	0	9580.35	0.287411	580.565	barge	0.0975349
REU	MeOH	2024	3.99456	0	none	0	9580.35	0.383214	580.565	barge	0.130047
REU	MeOH	2050	2.52742	0	none	0	9580.35	0.383214	580.565	barge	0.130047
REU	NH3	2024	3.43067	0	none	0	9580.35	0.339144	580.565	barge	0.123312
REU	NH3	2050	2.91467	0	none	0	9580.35	0.339144	580.565	barge	0.123312
ROU	LH2	2024	4.77321	202.912	truck	0.121747	2857.78	0.28092	580.565	barge	0.319311
ROU	LH2	2050	2.86181	202.912	truck	0.121747	2857.78	0.214334	580.565	barge	0.243837
ROU	LOHC	2024	3.90726	202.912	truck	0.158271	2857.78	0.0857334	580.565	barge	0.0975349
ROU	LOHC	2050	3.5883	202.912	truck	0.158271	2857.78	0.0857334	580.565	barge	0.0975349
ROU	MeOH	2024	3.93017	202.912	truck	0.211028	2857.78	0.114311	580.565	barge	0.130047
ROU	MeOH	2050	2.46303	202.912	truck	0.211028	2857.78	0.114311	580.565	barge	0.130047
ROU	NH3	2024	3.37218	202.912	truck	0.203521	2857.78	0.101165	580.565	barge	0.123312
ROU	NH3	2050	2.85618	202.912	truck	0.203521	2857.78	0.101165	580.565	barge	0.123312
RUS	LH2	2024	5.6767	1512.07	rail	0.756035	3530.2	0.347019	580.565	barge	0.319311
RUS	LH2	2050	3.31099	1512.07	rail	0.453621	3530.2	0.264765	580.565	barge	0.243837
RUS	LOHC	2024	3.91878	1512.07	rail	0.145159	3530.2	0.105906	580.565	barge	0.0975349
RUS	LOHC	2050	3.59833	1512.07	rail	0.145159	3530.2	0.105906	580.565	barge	0.0975349
RUS	MeOH	2024	3.94157	1512.07	rail	0.193545	3530.2	0.141208	580.565	barge	0.130047
RUS	MeOH	2050	2.47442	1512.07	rail	0.193545	3530.2	0.141208	580.565	barge	0.130047
RUS	NH3	2024	3.38711	1512.07	rail	0.187345	3530.2	0.124969	580.565	barge	0.123312
RUS	NH3	2050	2.87111	1512.07	rail	0.187345	3530.2	0.124969	580.565	barge	0.123312
RWA	LH2	2024	6.47443	1331.01	rail	0.665505	8046.18	0.790939	580.565	barge	0.319311
RWA	LH2	2050	3.74168	1331.01	rail	0.399303	8046.18	0.603463	580.565	barge	0.243837
RWA	LOHC	2024	4.04663	1331.01	rail	0.127777	8046.18	0.241385	580.565	barge	0.0975349
RWA	LOHC	2050	3.72293	1331.01	rail	0.127777	8046.18	0.241385	580.565	barge	0.0975349
RWA	MeOH	2024	4.10336	1331.01	rail	0.170369	8046.18	0.321847	580.565	barge	0.130047
RWA	MeOH	2050	2.63622	1331.01	rail	0.170369	8046.18	0.321847	580.565	barge	0.130047
RWA	NH3	2024	3.54053	1331.01	rail	0.164912	8046.18	0.284835	580.565	barge	0.123312
RWA	NH3	2050	3.02453	1331.01	rail	0.164912	8046.18	0.284835	580.565	barge	0.123312
SAU	LH2	2024	5.41588	972.66	truck	0.583596	3365.38	0.330817	580.565	barge	0.319311
SAU	LH2	2050	3.40484	972.66	truck	0.583596	3365.38	0.252404	580.565	barge	0.243837
SAU	LOHC	2024	4.52577	972.66	truck	0.758675	3365.38	0.100961	580.565	barge	0.0975349
SAU	LOHC	2050	4.20584	972.66	truck	0.758675	3365.38	0.100961	580.565	barge	0.0975349
SAU	MeOH	2024	4.75229	972.66	truck	1.01157	3365.38	0.134615	580.565	barge	0.130047
SAU	MeOH	2050	3.28515	972.66	truck	1.01157	3365.38	0.134615	580.565	barge	0.130047
SAU	NH3	2024	4.16691	972.66	truck	0.975578	3365.38	0.119134	580.565	barge	0.123312
SAU	NH3	2050	3.65091	972.66	truck	0.975578	3365.38	0.119134	580.565	barge	0.123312
SDN	LH2	2024	5.38352	1139.02	rail	0.56951	3189.43	0.313521	580.565	barge	0.319311
SDN	LH2	2050	3.14943	1139.02	rail	0.341706	3189.43	0.239207	580.565	barge	0.243837
SDN	LOHC	2024	3.87114	1139.02	rail	0.109346	3189.43	0.0956829	580.565	barge	0.0975349
SDN	LOHC	2050	3.55122	1139.02	rail	0.109346	3189.43	0.0956829	580.565	barge	0.0975349
SDN	MeOH	2024	3.87947	1139.02	rail	0.145795	3189.43	0.127577	580.565	barge	0.130047
SDN	MeOH	2050	2.41233	1139.02	rail	0.145795	3189.43	0.127577	580.565	barge	0.130047
SDN	NH3	2024	3.32619	1139.02	rail	0.141125	3189.43	0.112906	580.565	barge	0.123312
SDN	NH3	2050	2.81019	1139.02	rail	0.141125	3189.43	0.112906	580.565	barge	0.123312
SEN	LH2	2024	4.82967	0	none	0	3848.87	0.378344	580.565	barge	0.319311
SEN	LH2	2050	2.841	0	none	0	3848.87	0.288665	580.565	barge	0.243837
SEN	LOHC	2024	3.7805	0	none	0	3848.87	0.115466	580.565	barge	0.0975349
SEN	LOHC	2050	3.46094	0	none	0	3848.87	0.115466	580.565	barge	0.0975349
SEN	MeOH	2024	3.75957	0	none	0	3848.87	0.153955	580.565	barge	0.130047
SEN	MeOH	2050	2.29243	0	none	0	3848.87	0.153955	580.565	barge	0.130047
SEN	NH3	2024	3.20665	0	none	0	3848.87	0.13625	580.565	barge	0.123312
SEN	NH3	2050	2.69065	0	none	0	3848.87	0.13625	580.565	barge	0.123312
SGP	LH2	2024	6.26465	0	none	0	10995.2	1.08083	580.565	barge	0.319311
SGP	LH2	2050	3.61816	0	none	0	10995.2	0.82464	580.565	barge	0.243837
SGP	LOHC	2024	4.01097	0	none	0	10995.2	0.329856	580.565	barge	0.0975349
SGP	LOHC	2050	3.68605	0	none	0	10995.2	0.329856	580.565	barge	0.0975349
SGP	MeOH	2024	4.05257	0	none	0	10995.2	0.439808	580.565	barge	0.130047
SGP	MeOH	2050	2.58543	0	none	0	10995.2	0.439808	580.565	barge	0.130047
SGP	NH3	2024	3.48598	0	none	0	10995.2	0.38923	580.565	barge	0.123312
SGP	NH3	2050	2.96998	0	none	0	10995.2	0.38923	580.565	barge	0.123312
SHN	LH2	2024	6.16223	0	none	0	10485.1	1.03069	580.565	barge	0.319311
SHN	LH2	2050	3.56269	0	none	0	10485.1	0.786382	580.565	barge	0.243837
SHN	LOHC	2024	3.99452	0	none	0	10485.1	0.314553	580.565	barge	0.0975349
SHN	LOHC	2050	3.66998	0	none	0	10485.1	0.314553	580.565	barge	0.0975349
SHN	MeOH	2024	4.03166	0	none	0	10485.1	0.419404	580.565	barge	0.130047
SHN	MeOH	2050	2.56452	0	none	0	10485.1	0.419404	580.565	barge	0.130047
SHN	NH3	2024	3.46604	0	none	0	10485.1	0.371173	580.565	barge	0.123312
SHN	NH3	2050	2.95004	0	none	0	10485.1	0.371173	580.565	barge	0.123312
SLB	LH2	2024	7.46556	0	none	0	16975.8	1.66872	580.565	barge	0.319311
SLB	LH2	2050	4.26855	0	none	0	16975.8	1.27319	580.565	barge	0.243837
SLB	LOHC	2024	4.20384	0	none	0	16975.8	0.509274	580.565	barge	0.0975349
SLB	LOHC	2050	3.87444	0	none	0	16975.8	0.509274	580.565	barge	0.0975349
SLB	MeOH	2024	4.29778	0	none	0	16975.8	0.679032	580.565	barge	0.130047
SLB	MeOH	2050	2.83063	0	none	0	16975.8	0.679032	580.565	barge	0.130047
SLB	NH3	2024	3.71974	0	none	0	16975.8	0.600943	580.565	barge	0.123312
SLB	NH3	2050	3.20374	0	none	0	16975.8	0.600943	580.565	barge	0.123312
SLE	LH2	2024	5.17192	183.464	truck	0.110078	4911.46	0.482797	580.565	barge	0.319311
SLE	LH2	2050	3.07282	183.464	truck	0.110078	4911.46	0.36836	580.565	barge	0.243837
SLE	LOHC	2024	3.95828	183.464	truck	0.143102	4911.46	0.147344	580.565	barge	0.0975349
SLE	LOHC	2050	3.63779	183.464	truck	0.143102	4911.46	0.147344	580.565	barge	0.0975349
SLE	MeOH	2024	3.99413	183.464	truck	0.190803	4911.46	0.196458	580.565	barge	0.130047
SLE	MeOH	2050	2.52698	183.464	truck	0.190803	4911.46	0.196458	580.565	barge	0.130047
SLE	NH3	2024	3.43287	183.464	truck	0.184014	4911.46	0.173866	580.565	barge	0.123312
SLE	NH3	2050	2.91687	183.464	truck	0.184014	4911.46	0.173866	580.565	barge	0.123312
SLV	LH2	2024	6.15716	44.0883	truck	0.026453	10305.6	1.01304	580.565	barge	0.319311
SLV	LH2	2050	3.57111	44.0883	truck	0.026453	10305.6	0.77292	580.565	barge	0.243837
SLV	LOHC	2024	4.02321	44.0883	truck	0.0343889	10305.6	0.309168	580.565	barge	0.0975349
SLV	LOHC	2050	3.69878	44.0883	truck	0.0343889	10305.6	0.309168	580.565	barge	0.0975349
SLV	MeOH	2024	4.0702	44.0883	truck	0.0458518	10305.6	0.412224	580.565	barge	0.130047
SLV	MeOH	2050	2.60305	44.0883	truck	0.0458518	10305.6	0.412224	580.565	barge	0.130047
SLV	NH3	2024	3.50341	44.0883	truck	0.0442206	10305.6	0.364818	580.565	barge	0.123312
SLV	NH3	2050	2.98741	44.0883	truck	0.0442206	10305.6	0.364818	580.565	barge	0.123312
SOM	LH2	2024	5.70562	550.022	truck	0.330013	6286.91	0.618003	580.565	barge	0.319311
SOM	LH2	2050	3.45471	550.022	truck	0.330013	6286.91	0.471518	580.565	barge	0.243837
SOM	LOHC	2024	4.28938	550.022	truck	0.429017	6286.91	0.188607	580.565	barge	0.0975349
SOM	LOHC	2050	3.96758	550.022	truck	0.429017	6286.91	0.188607	580.565	barge	0.0975349
SOM	MeOH	2024	4.43211	550.022	truck	0.572023	6286.91	0.251476	580.565	barge	0.130047
SOM	MeOH	2050	2.96496	550.022	truck	0.572023	6286.91	0.251476	580.565	barge	0.130047
SOM	NH3	2024	3.85564	550.022	truck	0.551672	6286.91	0.222557	580.565	barge	0.123312
SOM	NH3	2050	3.33964	550.022	truck	0.551672	6286.91	0.222557	580.565	barge	0.123312
SPM	LH2	2024	5.1744	0	none	0	5565.66	0.547104	580.565	barge	0.319311
SPM	LH2	2050	3.0277	0	none	0	5565.66	0.417424	580.565	barge	0.243837
SPM	LOHC	2024	3.83586	0	none	0	5565.66	0.16697	580.565	barge	0.0975349
SPM	LOHC	2050	3.51502	0	none	0	5565.66	0.16697	580.565	barge	0.0975349
SPM	MeOH	2024	3.82996	0	none	0	5565.66	0.222626	580.565	barge	0.130047
SPM	MeOH	2050	2.36282	0	none	0	5565.66	0.222626	580.565	barge	0.130047
SPM	NH3	2024	3.27375	0	none	0	5565.66	0.197024	580.565	barge	0.123312
SPM	NH3	2050	2.75775	0	none	0	5565.66	0.197024	580.565	barge	0.123312
SRB	LH2	2024	4.67049	404.282	truck	0.242569	1641.76	0.161385	580.565	barge	0.319311
SRB	LH2	2050	2.85719	404.282	truck	0.242569	1641.76	0.123132	580.565	barge	0.243837
SRB	LOHC	2024	4.02557	404.282	truck	0.31534	1641.76	0.0492528	580.565	barge	0.0975349
SRB	LOHC	2050	3.70736	404.282	truck	0.31534	1641.76	0.0492528	580.565	barge	0.0975349
SRB	MeOH	2024	4.08994	404.282	truck	0.420453	1641.76	0.0656704	580.565	barge	0.130047
SRB	MeOH	2050	2.6228	404.282	truck	0.420453	1641.76	0.0656704	580.565	barge	0.130047
SRB	NH3	2024	3.52736	404.282	truck	0.405495	1641.76	0.0581183	580.565	barge	0.123312
SRB	NH3	2050	3.01136	404.282	truck	0.405495	1641.76	0.0581183	580.565	barge	0.123312
STP	LH2	2024	5.52965	0	none	0	7334.8	0.721011	580.565	barge	0.319311
STP	LH2	2050	3.22009	0	none	0	7334.8	0.55011	580.565	barge	0.243837
STP	LOHC	2024	3.89292	0	none	0	7334.8	0.220044	580.565	barge	0.0975349
STP	LOHC	2050	3.57075	0	none	0	7334.8	0.220044	580.565	barge	0.0975349
STP	MeOH	2024	3.9025	0	none	0	7334.8	0.293392	580.565	barge	0.130047
STP	MeOH	2050	2.43535	0	none	0	7334.8	0.293392	580.565	barge	0.130047
STP	NH3	2024	3.3429	0	none	0	7334.8	0.259652	580.565	barge	0.123312
STP	NH3	2050	2.8269	0	none	0	7334.8	0.259652	580.565	barge	0.123312
SUR	LH2	2024	5.35719	0.0195	truck	1.17e-05	6475.88	0.636579	580.565	barge	0.319311
SUR	LH2	2050	3.1267	0.0195	truck	1.17e-05	6475.88	0.485691	580.565	barge	0.243837
SUR	LOHC	2024	3.86523	0.0195	truck	1.521e-05	6475.88	0.194276	580.565	barge	0.0975349
SUR	LOHC	2050	3.54371	0.0195	truck	1.521e-05	6475.88	0.194276	580.565	barge	0.0975349
SUR	MeOH	2024	3.8673	0.0195	truck	2.028e-05	6475.88	0.259035	580.565	barge	0.130047
SUR	MeOH	2050	2.40016	0.0195	truck	2.028e-05	6475.88	0.259035	580.565	barge	0.130047
SUR	NH3	2024	3.30935	0.0195	truck	1.95585e-05	6475.88	0.229246	580.565	barge	0.123312
SUR	NH3	2050	2.79335	0.0195	truck	1.95585e-05	6475.88	0.229246	580.565	barge	0.123312
SVN	LH2	2024	4.53167	110.663	truck	0.0663978	1977.63	0.194401	580.565	barge	0.319311
SVN	LH2	2050	2.70763	110.663	truck	0.0663978	1977.63	0.148322	580.565	barge	0.243837
SVN	LOHC	2024	3.80672	110.663	truck	0.0863171	1977.63	0.0593289	580.565	barge	0.0975349
SVN	LOHC	2050	3.48848	110.663	truck	0.0863171	1977.63	0.0593289	580.565	barge	0.0975349
SVN	MeOH	2024	3.79805	110.663	truck	0.11509	1977.63	0.0791052	580.565	barge	0.130047
SVN	MeOH	2050	2.33091	110.663	truck	0.11509	1977.63	0.0791052	580.565	barge	0.130047
SVN	NH3	2024	3.24491	110.663	truck	0.110995	1977.63	0.0700081	580.565	barge	0.123312
SVN	NH3	2050	2.72891	110.663	truck	0.110995	1977.63	0.0700081	580.565	barge	0.123312
SWE	LH2	2024	5.22713	471.773	truck	0.283064	4177.75	0.410673	580.565	barge	0.319311
SWE	LH2	2050	3.17575	471.773	truck	0.283064	4177.75	0.313331	580.565	barge	0.243837
SWE	LOHC	2024	4.16015	471.773	truck	0.367983	4177.75	0.125333	580.565	barge	0.0975349
SWE	LOHC	2050	3.83999	471.773	truck	0.367983	4177.75	0.125333	580.565	barge	0.0975349
SWE	MeOH	2024	4.26417	471.773	truck	0.490644	4177.75	0.16711	580.565	barge	0.130047
SWE	MeOH	2050	2.79703	471.773	truck	0.490644	4177.75	0.16711	580.565	barge	0.130047
SWE	NH3	2024	3.69443	471.773	truck	0.473188	4177.75	0.147892	580.565	barge	0.123312
SWE	NH3	2050	3.17843	471.773	truck	0.473188	4177.75	0.147892	580.565	barge	0.123312
SWZ	LH2	2024	6.39974	317.175	truck	0.190305	10558.3	1.03788	580.565	barge	0.319311
SWZ	LH2	2050	3.77166	317.175	truck	0.190305	10558.3	0.791872	580.565	barge	0.243837
SWZ	LOHC	2024	4.24499	317.175	truck	0.247396	10558.3	0.316749	580.565	barge	0.0975349
SWZ	LOHC	2050	3.92016	317.175	truck	0.247396	10558.3	0.316749	580.565	barge	0.0975349
SWZ	MeOH	2024	4.36484	317.175	truck	0.329862	10558.3	0.422332	580.565	barge	0.130047
SWZ	MeOH	2050	2.8977	317.175	truck	0.329862	10558.3	0.422332	580.565	barge	0.130047
SWZ	NH3	2024	3.7882	317.175	truck	0.318127	10558.3	0.373764	580.565	barge	0.123312
SWZ	NH3	2050	3.2722	317.175	truck	0.318127	10558.3	0.373764	580.565	barge	0.123312
SYC	LH2	2024	5.55408	0	none	0	7456.47	0.732971	580.565	barge	0.319311
SYC	LH2	2050	3.23332	0	none	0	7456.47	0.559235	580.565	barge	0.243837
SYC	LOHC	2024	3.89684	0	none	0	7456.47	0.223694	580.565	barge	0.0975349
SYC	LOHC	2050	3.57458	0	none	0	7456.47	0.223694	580.565	barge	0.0975349
SYC	MeOH	2024	3.90749	0	none	0	7456.47	0.298259	580.565	barge	0.130047
SYC	MeOH	2050	2.44034	0	none	0	7456.47	0.298259	580.565	barge	0.130047
SYC	NH3	2024	3.34766	0	none	0	7456.47	0.263959	580.565	barge	0.123312
SYC	NH3	2050	2.83166	0	none	0	7456.47	0.263959	580.565	barge	0.123312
SYR	LH2	2024	4.70128	209.875	truck	0.125925	2475.22	0.243314	580.565	barge	0.319311
SYR	LH2	2050	2.82462	209.875	truck	0.125925	2475.22	0.185641	580.565	barge	0.243837
SYR	LOHC	2024	3.90037	209.875	truck	0.163703	2475.22	0.0742566	580.565	barge	0.0975349
SYR	LOHC	2050	3.58169	209.875	truck	0.163703	2475.22	0.0742566	580.565	barge	0.0975349
SYR	MeOH	2024	3.92173	209.875	truck	0.21827	2475.22	0.0990088	580.565	barge	0.130047
SYR	MeOH	2050	2.45459	209.875	truck	0.21827	2475.22	0.0990088	580.565	barge	0.130047
SYR	NH3	2024	3.36423	209.875	truck	0.210505	2475.22	0.0876228	580.565	barge	0.123312
SYR	NH3	2050	2.84823	209.875	truck	0.210505	2475.22	0.0876228	580.565	barge	0.123312
TCA	LH2	2024	5.56643	0	none	0	7517.96	0.739015	580.565	barge	0.319311
TCA	LH2	2050	3.24001	0	none	0	7517.96	0.563847	580.565	barge	0.243837
TCA	LOHC	2024	3.89882	0	none	0	7517.96	0.225539	580.565	barge	0.0975349
TCA	LOHC	2050	3.57652	0	none	0	7517.96	0.225539	580.565	barge	0.0975349
TCA	MeOH	2024	3.91001	0	none	0	7517.96	0.300718	580.565	barge	0.130047
TCA	MeOH	2050	2.44286	0	none	0	7517.96	0.300718	580.565	barge	0.130047
TCA	NH3	2024	3.35006	0	none	0	7517.96	0.266136	580.565	barge	0.123312
TCA	NH3	2050	2.83406	0	none	0	7517.96	0.266136	580.565	barge	0.123312
TCD	LH2	2024	6.4601	1528.72	rail	0.76436	7381.61	0.725612	580.565	barge	0.319311
TCD	LH2	2050	3.73539	1528.72	rail	0.458616	7381.61	0.553621	580.565	barge	0.243837
TCD	LOHC	2024	4.04462	1528.72	rail	0.146757	7381.61	0.221448	580.565	barge	0.0975349
TCD	LOHC	2050	3.72127	1528.72	rail	0.146757	7381.61	0.221448	580.565	barge	0.0975349
TCD	MeOH	2024	4.10162	1528.72	rail	0.195676	7381.61	0.295264	580.565	barge	0.130047
TCD	MeOH	2050	2.63448	1528.72	rail	0.195676	7381.61	0.295264	580.565	barge	0.130047
TCD	NH3	2024	3.53978	1528.72	rail	0.189408	7381.61	0.261309	580.565	barge	0.123312
TCD	NH3	2050	3.02378	1528.72	rail	0.189408	7381.61	0.261309	580.565	barge	0.123312
TGO	LH2	2024	5.39196	0	none	0	6649.1	0.653607	580.565	barge	0.319311
TGO	LH2	2050	3.14552	0	none	0	6649.1	0.498682	580.565	barge	0.243837
TGO	LOHC	2024	3.8708	0	none	0	6649.1	0.199473	580.565	barge	0.0975349
TGO	LOHC	2050	3.54915	0	none	0	6649.1	0.199473	580.565	barge	0.0975349
TGO	MeOH	2024	3.87438	0	none	0	6649.1	0.265964	580.565	barge	0.130047
TGO	MeOH	2050	2.40724	0	none	0	6649.1	0.265964	580.565	barge	0.130047
TGO	NH3	2024	3.3161	0	none	0	6649.1	0.235378	580.565	barge	0.123312
TGO	NH3	2050	2.8001	0	none	0	6649.1	0.235378	580.565	barge	0.123312
THA	LH2	2024	6.61831	18.8995	truck	0.0113397	12690.3	1.24746	580.565	barge	0.319311
THA	LH2	2050	3.81448	18.8995	truck	0.0113397	12690.3	0.951772	580.565	barge	0.243837
THA	LOHC	2024	4.08042	18.8995	truck	0.0147416	12690.3	0.380709	580.565	barge	0.0975349
THA	LOHC	2050	3.75421	18.8995	truck	0.0147416	12690.3	0.380709	580.565	barge	0.0975349
THA	MeOH	2024	4.14175	18.8995	truck	0.0196555	12690.3	0.507612	580.565	barge	0.130047
THA	MeOH	2050	2.6746	18.8995	truck	0.0196555	12690.3	0.507612	580.565	barge	0.130047
THA	NH3	2024	3.57126	18.8995	truck	0.0189562	12690.3	0.449237	580.565	barge	0.123312
THA	NH3	2050	3.05526	18.8995	truck	0.0189562	12690.3	0.449237	580.565	barge	0.123312
TJK	LH2	2024	6.87558	2103.74	rail	1.05187	7725.39	0.759406	580.565	barge	0.319311
TJK	LH2	2050	3.96469	2103.74	rail	0.631122	7725.39	0.579404	580.565	barge	0.243837
TJK	LOHC	2024	4.11221	2103.74	rail	0.201959	7725.39	0.231762	580.565	barge	0.0975349
TJK	LOHC	2050	3.78816	2103.74	rail	0.201959	7725.39	0.231762	580.565	barge	0.0975349
TJK	MeOH	2024	4.18989	2103.74	rail	0.269279	7725.39	0.309016	580.565	barge	0.130047
TJK	MeOH	2050	2.72275	2103.74	rail	0.269279	7725.39	0.309016	580.565	barge	0.130047
TJK	NH3	2024	3.62658	2103.74	rail	0.260653	7725.39	0.273479	580.565	barge	0.123312
TJK	NH3	2050	3.11058	2103.74	rail	0.260653	7725.39	0.273479	580.565	barge	0.123312
TKL	LH2	2024	7.86513	0	none	0	18965.7	1.86433	580.565	barge	0.319311
TKL	LH2	2050	4.48495	0	none	0	18965.7	1.42243	580.565	barge	0.243837
TKL	LOHC	2024	4.26801	0	none	0	18965.7	0.568971	580.565	barge	0.0975349
TKL	LOHC	2050	3.93712	0	none	0	18965.7	0.568971	580.565	barge	0.0975349
TKL	MeOH	2024	4.37936	0	none	0	18965.7	0.758628	580.565	barge	0.130047
TKL	MeOH	2050	2.91222	0	none	0	18965.7	0.758628	580.565	barge	0.130047
TKL	NH3	2024	3.79752	0	none	0	18965.7	0.671386	580.565	barge	0.123312
TKL	NH3	2050	3.28152	0	none	0	18965.7	0.671386	580.565	barge	0.123312
TKM	LH2	2024	6.76073	1947.57	rail	0.973785	7622.01	0.749244	580.565	barge	0.319311
TKM	LH2	2050	3.90133	1947.57	rail	0.584271	7622.01	0.571651	580.565	barge	0.243837
TKM	LOHC	2024	4.09353	1947.57	rail	0.186967	7622.01	0.22866	580.565	barge	0.0975349
TKM	LOHC	2050	3.76968	1947.57	rail	0.186967	7622.01	0.22866	580.565	barge	0.0975349
TKM	MeOH	2024	4.16551	1947.57	rail	0.249289	7622.01	0.30488	580.565	barge	0.130047
TKM	MeOH	2050	2.69837	1947.57	rail	0.249289	7622.01	0.30488	580.565	barge	0.130047
TKM	NH3	2024	3.60261	1947.57	rail	0.241304	7622.01	0.269819	580.565	barge	0.123312
TKM	NH3	2050	3.08661	1947.57	rail	0.241304	7622.01	0.269819	580.565	barge	0.123312
TLS	LH2	2024	6.97937	204.527	truck	0.122716	13839	1.36037	580.565	barge	0.319311
TLS	LH2	2050	4.05704	204.527	truck	0.122716	13839	1.03792	580.565	barge	0.243837
TLS	LOHC	2024	4.26267	204.527	truck	0.159531	13839	0.41517	580.565	barge	0.0975349
TLS	LOHC	2050	3.93547	204.527	truck	0.159531	13839	0.41517	580.565	barge	0.0975349
TLS	MeOH	2024	4.38208	204.527	truck	0.212708	13839	0.55356	580.565	barge	0.130047
TLS	MeOH	2050	2.91494	204.527	truck	0.212708	13839	0.55356	580.565	barge	0.130047
TLS	NH3	2024	3.80303	204.527	truck	0.205141	13839	0.489901	580.565	barge	0.123312
TLS	NH3	2050	3.28703	204.527	truck	0.205141	13839	0.489901	580.565	barge	0.123312
TON	LH2	2024	7.9726	0	none	0	19500.9	1.91694	580.565	barge	0.319311
TON	LH2	2050	4.54315	0	none	0	19500.9	1.46257	580.565	barge	0.243837
TON	LOHC	2024	4.28527	0	none	0	19500.9	0.585027	580.565	barge	0.0975349
TON	LOHC	2050	3.95398	0	none	0	19500.9	0.585027	580.565	barge	0.0975349
TON	MeOH	2024	4.40131	0	none	0	19500.9	0.780036	580.565	barge	0.130047
TON	MeOH	2050	2.93416	0	none	0	19500.9	0.780036	580.565	barge	0.130047
TON	NH3	2024	3.81844	0	none	0	19500.9	0.690332	580.565	barge	0.123312
TON	NH3	2050	3.30244	0	none	0	19500.9	0.690332	580.565	barge	0.123312
TTO	LH2	2024	5.4541	0	none	0	6958.55	0.684025	580.565	barge	0.319311
TTO	LH2	2050	3.17917	0	none	0	6958.55	0.521891	580.565	barge	0.243837
TTO	LOHC	2024	3.88078	0	none	0	6958.55	0.208757	580.565	barge	0.0975349
TTO	LOHC	2050	3.55889	0	none	0	6958.55	0.208757	580.565	barge	0.0975349
TTO	MeOH	2024	3.88707	0	none	0	6958.55	0.278342	580.565	barge	0.130047
TTO	MeOH	2050	2.41993	0	none	0	6958.55	0.278342	580.565	barge	0.130047
TTO	NH3	2024	3.3282	0	none	0	6958.55	0.246333	580.565	barge	0.123312
TTO	NH3	2050	2.8122	0	none	0	6958.55	0.246333	580.565	barge	0.123312
TUN	LH2	2024	4.21391	7.41421	truck	0.00444853	756.383	0.0743524	580.565	barge	0.319311
TUN	LH2	2050	2.50939	7.41421	truck	0.00444853	756.383	0.0567287	580.565	barge	0.243837
TUN	LOHC	2024	3.68656	7.41421	truck	0.00578308	756.383	0.0226915	580.565	barge	0.0975349
TUN	LOHC	2050	3.36932	7.41421	truck	0.00578308	756.383	0.0226915	580.565	barge	0.0975349
TUN	MeOH	2024	3.6405	7.41421	truck	0.00771078	756.383	0.0302553	580.565	barge	0.130047
TUN	MeOH	2050	2.17336	7.41421	truck	0.00771078	756.383	0.0302553	580.565	barge	0.130047
TUN	NH3	2024	3.09323	7.41421	truck	0.00743645	756.383	0.026776	580.565	barge	0.123312
TUN	NH3	2050	2.57723	7.41421	truck	0.00743645	756.383	0.026776	580.565	barge	0.123312
TUR	LH2	2024	4.87975	475.899	truck	0.285539	2433.33	0.239196	580.565	barge	0.319311
TUR	LH2	2050	2.98866	475.899	truck	0.285539	2433.33	0.1825	580.565	barge	0.243837
TUR	LOHC	2024	4.10712	475.899	truck	0.371201	2433.33	0.0729999	580.565	barge	0.0975349
TUR	LOHC	2050	3.78826	475.899	truck	0.371201	2433.33	0.0729999	580.565	barge	0.0975349
TUR	MeOH	2024	4.19695	475.899	truck	0.494935	2433.33	0.0973332	580.565	barge	0.130047
TUR	MeOH	2050	2.7298	475.899	truck	0.494935	2433.33	0.0973332	580.565	barge	0.130047
TUR	NH3	2024	3.6304	475.899	truck	0.477327	2433.33	0.0861399	580.565	barge	0.123312
TUR	NH3	2050	3.1144	475.899	truck	0.477327	2433.33	0.0861399	580.565	barge	0.123312
TUV	LH2	2024	7.91292	0	none	0	19203.7	1.88772	580.565	barge	0.319311
TUV	LH2	2050	4.51083	0	none	0	19203.7	1.44028	580.565	barge	0.243837
TUV	LOHC	2024	4.27569	0	none	0	19203.7	0.576111	580.565	barge	0.0975349
TUV	LOHC	2050	3.94462	0	none	0	19203.7	0.576111	580.565	barge	0.0975349
TUV	MeOH	2024	4.38912	0	none	0	19203.7	0.768148	580.565	barge	0.130047
TUV	MeOH	2050	2.92198	0	none	0	19203.7	0.768148	580.565	barge	0.130047
TUV	NH3	2024	3.80683	0	none	0	19203.7	0.679811	580.565	barge	0.123312
TUV	NH3	2050	3.29083	0	none	0	19203.7	0.679811	580.565	barge	0.123312
TWN	LH2	2024	7.17677	346.801	truck	0.208081	14324.3	1.40808	580.565	barge	0.319311
TWN	LH2	2050	4.19998	346.801	truck	0.208081	14324.3	1.07432	580.565	barge	0.243837
TWN	LOHC	2024	4.38961	346.801	truck	0.270505	14324.3	0.429729	580.565	barge	0.0975349
TWN	LOHC	2050	4.06194	346.801	truck	0.270505	14324.3	0.429729	580.565	barge	0.0975349
TWN	MeOH	2024	4.55009	346.801	truck	0.360673	14324.3	0.572972	580.565	barge	0.130047
TWN	MeOH	2050	3.08294	346.801	truck	0.360673	14324.3	0.572972	580.565	barge	0.130047
TWN	NH3	2024	3.96522	346.801	truck	0.347841	14324.3	0.50708	580.565	barge	0.123312
TWN	NH3	2050	3.44922	346.801	truck	0.347841	14324.3	0.50708	580.565	barge	0.123312
TZA	LH2	2024	5.80905	194.024	truck	0.116414	8047.48	0.791067	580.565	barge	0.319311
TZA	LH2	2050	3.42056	194.024	truck	0.116414	8047.48	0.603561	580.565	barge	0.243837
TZA	LOHC	2024	4.06768	194.024	truck	0.151339	8047.48	0.241424	580.565	barge	0.0975349
TZA	LOHC	2050	3.74483	194.024	truck	0.151339	8047.48	0.241424	580.565	barge	0.0975349
TZA	MeOH	2024	4.1337	194.024	truck	0.201785	8047.48	0.321899	580.565	barge	0.130047
TZA	MeOH	2050	2.66655	194.024	truck	0.201785	8047.48	0.321899	580.565	barge	0.130047
TZA	NH3	2024	3.56608	194.024	truck	0.194606	8047.48	0.284881	580.565	barge	0.123312
TZA	NH3	2050	3.05008	194.024	truck	0.194606	8047.48	0.284881	580.565	barge	0.123312
UGA	LH2	2024	6.29568	1137.46	rail	0.56873	7736.75	0.760523	580.565	barge	0.319311
UGA	LH2	2050	3.64343	1137.46	rail	0.341238	7736.75	0.580256	580.565	barge	0.243837
UGA	LOHC	2024	4.01764	1137.46	rail	0.109196	7736.75	0.232102	580.565	barge	0.0975349
UGA	LOHC	2050	3.69431	1137.46	rail	0.109196	7736.75	0.232102	580.565	barge	0.0975349
UGA	MeOH	2024	4.06571	1137.46	rail	0.145595	7736.75	0.30947	580.565	barge	0.130047
UGA	MeOH	2050	2.59857	1137.46	rail	0.145595	7736.75	0.30947	580.565	barge	0.130047
UGA	NH3	2024	3.50374	1137.46	rail	0.140931	7736.75	0.273881	580.565	barge	0.123312
UGA	NH3	2050	2.98774	1137.46	rail	0.140931	7736.75	0.273881	580.565	barge	0.123312
UKR	LH2	2024	4.69352	0	none	0	3170.81	0.311691	580.565	barge	0.319311
UKR	LH2	2050	2.76726	0	none	0	3170.81	0.237811	580.565	barge	0.243837
UKR	LOHC	2024	3.75863	0	none	0	3170.81	0.0951243	580.565	barge	0.0975349
UKR	LOHC	2050	3.43958	0	none	0	3170.81	0.0951243	580.565	barge	0.0975349
UKR	MeOH	2024	3.73177	0	none	0	3170.81	0.126832	580.565	barge	0.130047
UKR	MeOH	2050	2.26463	0	none	0	3170.81	0.126832	580.565	barge	0.130047
UKR	NH3	2024	3.18014	0	none	0	3170.81	0.112247	580.565	barge	0.123312
UKR	NH3	2050	2.66414	0	none	0	3170.81	0.112247	580.565	barge	0.123312
URY	LH2	2024	6.94816	749.121	truck	0.449473	11778.3	1.15781	580.565	barge	0.319311
URY	LH2	2050	4.17808	749.121	truck	0.449473	11778.3	0.883372	580.565	barge	0.243837
URY	LOHC	2024	4.62222	749.121	truck	0.584314	11778.3	0.353349	580.565	barge	0.0975349
URY	LOHC	2050	4.29615	749.121	truck	0.584314	11778.3	0.353349	580.565	barge	0.0975349
URY	MeOH	2024	4.86452	749.121	truck	0.779086	11778.3	0.471132	580.565	barge	0.130047
URY	MeOH	2050	3.39737	749.121	truck	0.779086	11778.3	0.471132	580.565	barge	0.130047
URY	NH3	2024	4.27072	749.121	truck	0.751368	11778.3	0.416952	580.565	barge	0.123312
URY	NH3	2050	3.75472	749.121	truck	0.751368	11778.3	0.416952	580.565	barge	0.123312
USA	LH2	2024	7.35005	2242.21	rail	1.12111	9672.82	0.950838	580.565	barge	0.319311
USA	LH2	2050	4.22269	2242.21	rail	0.672663	9672.82	0.725461	580.565	barge	0.243837
USA	LOHC	2024	4.18862	2242.21	rail	0.215252	9672.82	0.290185	580.565	barge	0.0975349
USA	LOHC	2050	3.86301	2242.21	rail	0.215252	9672.82	0.290185	580.565	barge	0.0975349
USA	MeOH	2024	4.2876	2242.21	rail	0.287003	9672.82	0.386913	580.565	barge	0.130047
USA	MeOH	2050	2.82046	2242.21	rail	0.287003	9672.82	0.386913	580.565	barge	0.130047
USA	NH3	2024	3.72037	2242.21	rail	0.27781	9672.82	0.342418	580.565	barge	0.123312
USA	NH3	2050	3.20437	2242.21	rail	0.27781	9672.82	0.342418	580.565	barge	0.123312
UZB	LH2	2024	7.19443	2632.95	rail	1.31648	7725.39	0.759406	580.565	barge	0.319311
UZB	LH2	2050	4.14131	2632.95	rail	0.789885	7725.39	0.579404	580.565	barge	0.243837
UZB	LOHC	2024	4.1642	2632.95	rail	0.252763	7725.39	0.231762	580.565	barge	0.0975349
UZB	LOHC	2050	3.83976	2632.95	rail	0.252763	7725.39	0.231762	580.565	barge	0.0975349
UZB	MeOH	2024	4.25816	2632.95	rail	0.337018	7725.39	0.309016	580.565	barge	0.130047
UZB	MeOH	2050	2.79102	2632.95	rail	0.337018	7725.39	0.309016	580.565	barge	0.130047
UZB	NH3	2024	3.6941	2632.95	rail	0.326223	7725.39	0.273479	580.565	barge	0.123312
UZB	NH3	2050	3.1781	2632.95	rail	0.326223	7725.39	0.273479	580.565	barge	0.123312
VCT	LH2	2024	5.42988	0	none	0	6837.94	0.67217	580.565	barge	0.319311
VCT	LH2	2050	3.16606	0	none	0	6837.94	0.512845	580.565	barge	0.243837
VCT	LOHC	2024	3.87689	0	none	0	6837.94	0.205138	580.565	barge	0.0975349
VCT	LOHC	2050	3.55509	0	none	0	6837.94	0.205138	580.565	barge	0.0975349
VCT	MeOH	2024	3.88213	0	none	0	6837.94	0.273518	580.565	barge	0.130047
VCT	MeOH	2050	2.41498	0	none	0	6837.94	0.273518	580.565	barge	0.130047
VCT	NH3	2024	3.32348	0	none	0	6837.94	0.242063	580.565	barge	0.123312
VCT	NH3	2050	2.80748	0	none	0	6837.94	0.242063	580.565	barge	0.123312
VEN	LH2	2024	5.7238	205.187	truck	0.123112	7583.85	0.745492	580.565	barge	0.319311
VEN	LH2	2050	3.37721	205.187	truck	0.123112	7583.85	0.568789	580.565	barge	0.243837
VEN	LOHC	2024	4.06146	205.187	truck	0.160046	7583.85	0.227516	580.565	barge	0.0975349
VEN	LOHC	2050	3.73894	205.187	truck	0.160046	7583.85	0.227516	580.565	barge	0.0975349
VEN	MeOH	2024	4.12631	205.187	truck	0.213394	7583.85	0.303354	580.565	barge	0.130047
VEN	MeOH	2050	2.65916	205.187	truck	0.213394	7583.85	0.303354	580.565	barge	0.130047
VEN	NH3	2024	3.5592	205.187	truck	0.205803	7583.85	0.268468	580.565	barge	0.123312
VEN	NH3	2050	3.0432	205.187	truck	0.205803	7583.85	0.268468	580.565	barge	0.123312
VGB	LH2	2024	5.44232	0	none	0	6899.89	0.678259	580.565	barge	0.319311
VGB	LH2	2050	3.17279	0	none	0	6899.89	0.517492	580.565	barge	0.243837
VGB	LOHC	2024	3.87889	0	none	0	6899.89	0.206997	580.565	barge	0.0975349
VGB	LOHC	2050	3.55705	0	none	0	6899.89	0.206997	580.565	barge	0.0975349
VGB	MeOH	2024	3.88467	0	none	0	6899.89	0.275996	580.565	barge	0.130047
VGB	MeOH	2050	2.41752	0	none	0	6899.89	0.275996	580.565	barge	0.130047
VGB	NH3	2024	3.3259	0	none	0	6899.89	0.244256	580.565	barge	0.123312
VGB	NH3	2050	2.8099	0	none	0	6899.89	0.244256	580.565	barge	0.123312
VIR	LH2	2024	5.44866	0	none	0	6931.48	0.681364	580.565	barge	0.319311
VIR	LH2	2050	3.17623	0	none	0	6931.48	0.519861	580.565	barge	0.243837
VIR	LOHC	2024	3.87991	0	none	0	6931.48	0.207944	580.565	barge	0.0975349
VIR	LOHC	2050	3.55804	0	none	0	6931.48	0.207944	580.565	barge	0.0975349
VIR	MeOH	2024	3.88596	0	none	0	6931.48	0.277259	580.565	barge	0.130047
VIR	MeOH	2050	2.41882	0	none	0	6931.48	0.277259	580.565	barge	0.130047
VIR	NH3	2024	3.32714	0	none	0	6931.48	0.245374	580.565	barge	0.123312
VIR	NH3	2050	2.81114	0	none	0	6931.48	0.245374	580.565	barge	0.123312
VNM	LH2	2024	7.44864	1513.76	rail	0.75688	12349.5	1.21396	580.565	barge	0.319311
VNM	LH2	2050	4.27066	1513.76	rail	0.454128	12349.5	0.926212	580.565	barge	0.243837
VNM	LOHC	2024	4.20337	1513.76	rail	0.145321	12349.5	0.370485	580.565	barge	0.0975349
VNM	LOHC	2050	3.8763	1513.76	rail	0.145321	12349.5	0.370485	580.565	barge	0.0975349
VNM	MeOH	2024	4.30337	1513.76	rail	0.193761	12349.5	0.49398	580.565	barge	0.130047
VNM	MeOH	2050	2.83623	1513.76	rail	0.193761	12349.5	0.49398	580.565	barge	0.130047
VNM	NH3	2024	3.73205	1513.76	rail	0.187555	12349.5	0.437172	580.565	barge	0.123312
VNM	NH3	2050	3.21605	1513.76	rail	0.187555	12349.5	0.437172	580.565	barge	0.123312
VUT	LH2	2024	7.7372	0	none	0	18328.6	1.8017	580.565	barge	0.319311
VUT	LH2	2050	4.41567	0	none	0	18328.6	1.37464	580.565	barge	0.243837
VUT	LOHC	2024	4.24747	0	none	0	18328.6	0.549858	580.565	barge	0.0975349
VUT	LOHC	2050	3.91705	0	none	0	18328.6	0.549858	580.565	barge	0.0975349
VUT	MeOH	2024	4.35324	0	none	0	18328.6	0.733144	580.565	barge	0.130047
VUT	MeOH	2050	2.8861	0	none	0	18328.6	0.733144	580.565	barge	0.130047
VUT	NH3	2024	3.77262	0	none	0	18328.6	0.648832	580.565	barge	0.123312
VUT	NH3	2050	3.25662	0	none	0	18328.6	0.648832	580.565	barge	0.123312
WLF	LH2	2024	7.98898	0	none	0	19582.5	1.92496	580.565	barge	0.319311
WLF	LH2	2050	4.55203	0	none	0	19582.5	1.46869	580.565	barge	0.243837
WLF	LOHC	2024	4.28791	0	none	0	19582.5	0.587475	580.565	barge	0.0975349
WLF	LOHC	2050	3.95655	0	none	0	19582.5	0.587475	580.565	barge	0.0975349
WLF	MeOH	2024	4.40465	0	none	0	19582.5	0.7833	580.565	barge	0.130047
WLF	MeOH	2050	2.93751	0	none	0	19582.5	0.7833	580.565	barge	0.130047
WLF	NH3	2024	3.82163	0	none	0	19582.5	0.693221	580.565	barge	0.123312
WLF	NH3	2050	3.30563	0	none	0	19582.5	0.693221	580.565	barge	0.123312
WSM	LH2	2024	7.90027	0	none	0	19140.7	1.88153	580.565	barge	0.319311
WSM	LH2	2050	4.50398	0	none	0	19140.7	1.43555	580.565	barge	0.243837
WSM	LOHC	2024	4.27366	0	none	0	19140.7	0.574221	580.565	barge	0.0975349
WSM	LOHC	2050	3.94263	0	none	0	19140.7	0.574221	580.565	barge	0.0975349
WSM	MeOH	2024	4.38654	0	none	0	19140.7	0.765628	580.565	barge	0.130047
WSM	MeOH	2050	2.9194	0	none	0	19140.7	0.765628	580.565	barge	0.130047
WSM	NH3	2024	3.80436	0	none	0	19140.7	0.677581	580.565	barge	0.123312
WSM	NH3	2050	3.28836	0	none	0	19140.7	0.677581	580.565	barge	0.123312
YEM	LH2	2024	5.23826	345.439	truck	0.207263	4675.15	0.459567	580.565	barge	0.319311
YEM	LH2	2050	3.14978	345.439	truck	0.207263	4675.15	0.350636	580.565	barge	0.243837
YEM	LOHC	2024	4.07736	345.439	truck	0.269442	4675.15	0.140255	580.565	barge	0.0975349
YEM	LOHC	2050	3.75693	345.439	truck	0.269442	4675.15	0.140255	580.565	barge	0.0975349
YEM	MeOH	2024	4.15305	345.439	truck	0.359257	4675.15	0.187006	580.565	barge	0.130047
YEM	MeOH	2050	2.68591	345.439	truck	0.359257	4675.15	0.187006	580.565	barge	0.130047
YEM	NH3	2024	3.58669	345.439	truck	0.346475	4675.15	0.1655	580.565	barge	0.123312
YEM	NH3	2050	3.07069	345.439	truck	0.346475	4675.15	0.1655	580.565	barge	0.123312
ZAF	LH2	2024	6.69055	629.633	truck	0.37778	10913.4	1.07279	580.565	barge	0.319311
ZAF	LH2	2050	4.00829	629.633	truck	0.37778	10913.4	0.818505	580.565	barge	0.243837
ZAF	LOHC	2024	4.50086	629.633	truck	0.491114	10913.4	0.327402	580.565	barge	0.0975349
ZAF	LOHC	2050	4.17553	629.633	truck	0.491114	10913.4	0.327402	580.565	barge	0.0975349
ZAF	MeOH	2024	4.70467	629.633	truck	0.654818	10913.4	0.436536	580.565	barge	0.130047
ZAF	MeOH	2050	3.23752	629.633	truck	0.654818	10913.4	0.436536	580.565	barge	0.130047
ZAF	NH3	2024	4.11662	629.633	truck	0.631522	10913.4	0.386334	580.565	barge	0.123312
ZAF	NH3	2050	3.60062	629.633	truck	0.631522	10913.4	0.386334	580.565	barge	0.123312
ZMB	LH2	2024	7.23526	1756.57	rail	0.878285	10558.3	1.03788	580.565	barge	0.319311
ZMB	LH2	2050	4.1569	1756.57	rail	0.526971	10558.3	0.791872	580.565	barge	0.243837
ZMB	LOHC	2024	4.16946	1756.57	rail	0.168631	10558.3	0.316749	580.565	barge	0.0975349
ZMB	LOHC	2050	3.84355	1756.57	rail	0.168631	10558.3	0.316749	580.565	barge	0.0975349
ZMB	MeOH	2024	4.26126	1756.57	rail	0.224841	10558.3	0.422332	580.565	barge	0.130047
ZMB	MeOH	2050	2.79411	1756.57	rail	0.224841	10558.3	0.422332	580.565	barge	0.130047
ZMB	NH3	2024	3.69302	1756.57	rail	0.217639	10558.3	0.373764	580.565	barge	0.123312
ZMB	NH3	2050	3.17702	1756.57	rail	0.217639	10558.3	0.373764	580.565	barge	0.123312
ZWE	LH2	2024	6.96088	1301.17	rail	0.650585	10558.3	1.03788	580.565	barge	0.319311
ZWE	LH2	2050	4.00491	1301.17	rail	0.390351	10558.3	0.791872	580.565	barge	0.243837
ZWE	LOHC	2024	4.12472	1301.17	rail	0.124912	10558.3	0.316749	580.565	barge	0.0975349
ZWE	LOHC	2050	3.79915	1301.17	rail	0.124912	10558.3	0.316749	580.565	barge	0.0975349
ZWE	MeOH	2024	4.20251	1301.17	rail	0.16655	10558.3	0.422332	580.565	barge	0.130047
ZWE	MeOH	2050	2.73537	1301.17	rail	0.16655	10558.3	0.422332	580.565	barge	0.130047
ZWE	NH3	2024	3.63491	1301.17	rail	0.161215	10558.3	0.373764	580.565	barge	0.123312
ZWE	NH3	2050	3.11891	1301.17	rail	0.161215	10558.3	0.373764	580.565	barge	0.123312
