# Supplementary material for: Global cost drivers and regional trade-offs for low-carbon fuels: a prospective techno-economic assessment
Source: Royal Society of Chemistry journal article supplement (doi:10.1039/d5ee05591a), 2026-01-01
Supplement: d5ee05591a2.zip [file monte_carlo_stats_2deg30.xlsx]

## Sheet: Stats_PEM
	mean	median	std	p10	p90	min	max
CHE	0.170877	0.168217	0.0347668	0.129812	0.211696	0.0896921	0.267029
SLV	0.134117	0.131967	0.0259654	0.10205	0.168034	0.0811728	0.190827
ARG	0.145825	0.143345	0.0252906	0.117043	0.183815	0.0832535	0.21594
PAN	0.119597	0.117239	0.0224144	0.0937019	0.147445	0.0669192	0.182659
UKR	0.163556	0.160371	0.0299142	0.12883	0.198141	0.102395	0.274389
GEO	0.125448	0.120663	0.0281819	0.0926853	0.164711	0.0712982	0.23245
CUB	0.15233	0.15065	0.0281757	0.117184	0.191631	0.104233	0.236338
ECU	0.154493	0.151564	0.030274	0.122332	0.195532	0.0976922	0.244366
DEU	0.124822	0.122982	0.0218264	0.100712	0.159314	0.0715319	0.181473
BFA	0.123697	0.119663	0.0246086	0.0951235	0.157259	0.0715774	0.184107
MDG	0.111839	0.110157	0.0236461	0.0814406	0.140826	0.0647241	0.168388
KGZ	0.134474	0.132392	0.0275406	0.0963653	0.172333	0.0863699	0.198698
IRQ	0.127124	0.124763	0.0275031	0.0937939	0.167878	0.0724149	0.203004
SOM	0.123476	0.122798	0.0255829	0.0920906	0.152598	0.0669813	0.196319
NAM	0.112004	0.109821	0.0213402	0.0836192	0.140292	0.0665763	0.176662
ARE	0.10245	0.0983612	0.0229745	0.0746657	0.127009	0.0539333	0.187867
HUN	0.123366	0.120401	0.0246883	0.0928867	0.159268	0.0712903	0.189116
SEN	0.10624	0.107734	0.0195979	0.0816673	0.13068	0.0683955	0.159107
LBY	0.0983277	0.0952877	0.0190235	0.0786277	0.121996	0.0599067	0.157187
SDN	0.149972	0.146361	0.0256731	0.118207	0.182813	0.0925721	0.226929
MYS	0.121601	0.119827	0.0251165	0.0932827	0.156968	0.0669505	0.197728
SUR	0.138478	0.136135	0.0292566	0.105208	0.178927	0.0820144	0.214543
BLZ	0.140507	0.138031	0.0237458	0.111069	0.170563	0.0958001	0.203192
SVN	0.140768	0.137033	0.0304212	0.102575	0.186667	0.0893753	0.21427
CZE	0.123791	0.120862	0.0269346	0.0927289	0.158255	0.076472	0.21894
IRN	0.124515	0.121452	0.0241684	0.0970858	0.157827	0.0837888	0.200146
SLE	0.137302	0.13462	0.0272457	0.103093	0.174284	0.0739366	0.211798
JOR	0.113115	0.110486	0.0199152	0.0873284	0.138295	0.0758256	0.176852
LTU	0.12684	0.122218	0.0246558	0.0981754	0.155164	0.0768499	0.2018
SWE	0.116592	0.11239	0.0263519	0.0888166	0.149554	0.0748645	0.211814
POL	0.126603	0.121919	0.0202099	0.101671	0.152477	0.0874607	0.176952
TZA	0.117652	0.116866	0.0251289	0.0878334	0.1514	0.0708691	0.215528
VEN	0.197351	0.195243	0.0376311	0.155756	0.240168	0.124389	0.319353
KEN	0.120042	0.118024	0.0225136	0.0918858	0.149488	0.0830335	0.189315
SVK	0.129358	0.124919	0.0266198	0.0969134	0.161645	0.0726099	0.211931
GBR	0.130974	0.124846	0.0262193	0.0968477	0.165158	0.0889545	0.228101
MAR	0.108391	0.108917	0.0228288	0.0821096	0.134909	0.067269	0.172347
AGO	0.128265	0.122061	0.0280245	0.094495	0.170516	0.0808198	0.206154
KWT	0.0980034	0.0954285	0.0203631	0.0747829	0.123927	0.0491729	0.159395
UGA	0.129813	0.130588	0.0253622	0.0981445	0.161014	0.0833337	0.226122
KHM	0.11961	0.115534	0.0299092	0.083025	0.16309	0.0758224	0.228639
COD	0.128665	0.123617	0.0295351	0.0914692	0.170305	0.0772738	0.225005
QAT	0.098316	0.0938512	0.024805	0.0716966	0.132914	0.062664	0.177237
BGD	0.125745	0.121219	0.0248355	0.0968526	0.1574	0.0687954	0.187985
GRC	0.139136	0.135842	0.030193	0.10362	0.180586	0.0824697	0.239521
IND	0.137696	0.138393	0.0296005	0.096718	0.173212	0.0749001	0.23539
MDA	0.141128	0.138256	0.0274018	0.104824	0.177565	0.0924717	0.224752
GAB	0.145758	0.144057	0.0267954	0.114663	0.182401	0.0878136	0.214192
MWI	0.127372	0.127123	0.0265267	0.0962257	0.161391	0.0667654	0.19592
EGY	0.124298	0.121303	0.0226061	0.0973164	0.153111	0.080119	0.208202
MNE	0.155834	0.149797	0.0345092	0.117997	0.207925	0.0845523	0.235709
ZAF	0.108126	0.106093	0.0225369	0.0831902	0.134953	0.0697327	0.207255
MKD	0.149236	0.14374	0.036478	0.108884	0.193391	0.0841696	0.265015
BHS	0.114007	0.112366	0.0209475	0.0888709	0.143638	0.0789654	0.177942
ZWE	0.130197	0.126101	0.0239165	0.105979	0.15903	0.0809866	0.236036
IRL	0.12745	0.124834	0.0241168	0.0952471	0.156824	0.0700467	0.189828
LKA	0.145259	0.142661	0.030158	0.108441	0.189305	0.0880413	0.236696
SRB	0.149351	0.142049	0.0345053	0.113817	0.191384	0.0901129	0.307196
COG	0.142715	0.137004	0.0309619	0.102289	0.183062	0.0779604	0.235321
NZL	0.115302	0.115119	0.0204459	0.0904939	0.141469	0.0649047	0.173379
LVA	0.119338	0.115354	0.0220638	0.0957339	0.151319	0.0762988	0.183054
AUS	0.117012	0.115893	0.0228157	0.0893027	0.154191	0.070542	0.17418
FLK	0.175534	0.17427	0.0355102	0.133081	0.214933	0.105931	0.278113
ISR	0.112297	0.105253	0.0224635	0.090138	0.146773	0.0749315	0.188642
COL	0.116857	0.11178	0.0259043	0.0853813	0.156491	0.0736985	0.194176
FIN	0.175788	0.173868	0.039945	0.127876	0.231883	0.103682	0.322271
GMB	0.107316	0.104411	0.0217684	0.0786236	0.139949	0.0700858	0.163071
PRT	0.125607	0.119544	0.0274445	0.0966421	0.156281	0.079682	0.254748
SAU	0.118244	0.115964	0.0218561	0.0936471	0.147135	0.0742904	0.171393
PNG	0.123356	0.118692	0.0252548	0.0928819	0.155879	0.0760499	0.207839
JAM	0.11964	0.116388	0.0262248	0.0896272	0.151481	0.0762471	0.208612
PAK	0.136979	0.131974	0.0312013	0.105299	0.182509	0.0818304	0.236171
ZMB	0.131836	0.127849	0.0275671	0.0976864	0.166958	0.0917457	0.212774
CHN	0.102335	0.0981457	0.0225256	0.078758	0.12689	0.0662201	0.214424
KAZ	0.123864	0.11667	0.026299	0.0949161	0.158725	0.0792391	0.194114
ARM	0.135285	0.131903	0.0304533	0.103297	0.175513	0.0774721	0.24916
LUX	0.131702	0.128014	0.0242244	0.104407	0.161354	0.0875306	0.202116
ALB	0.146218	0.140634	0.0359689	0.112239	0.186114	0.0934947	0.368078
HND	0.131243	0.129919	0.0281185	0.0941508	0.166373	0.076835	0.216573
NIC	0.124206	0.119724	0.0282271	0.0931207	0.161791	0.0660354	0.213356
NER	0.118378	0.115379	0.0258321	0.090329	0.148638	0.0825157	0.250211
ETH	0.143179	0.142623	0.0262336	0.110329	0.173225	0.0820612	0.216736
GRL	0.16671	0.165807	0.0362909	0.125349	0.216947	0.0979337	0.285808
OMN	0.115174	0.111711	0.0216978	0.0929389	0.146711	0.0719389	0.187971
ESP	0.135163	0.131153	0.026302	0.107408	0.166961	0.0783933	0.23726
TJK	0.135545	0.134913	0.0273497	0.103196	0.168535	0.0690521	0.236021
YEM	0.158006	0.155229	0.0320947	0.119471	0.202932	0.0980851	0.257113
THA	0.112916	0.110169	0.0253969	0.0830529	0.148234	0.0694384	0.191967
UZB	0.123667	0.116352	0.0297483	0.0912617	0.168038	0.0794176	0.247299
DZA	0.108891	0.106978	0.0212152	0.0860008	0.133454	0.0666473	0.176037
FRA	0.125742	0.123836	0.0230506	0.0981552	0.154062	0.080283	0.204172
CRI	0.130336	0.127408	0.027224	0.09681	0.164698	0.0784359	0.209938
AUT	0.11409	0.112389	0.0270345	0.0797403	0.15039	0.0575495	0.184157
GHA	0.143053	0.140693	0.027374	0.110506	0.179026	0.0905324	0.217348
MEX	0.110636	0.10863	0.0210325	0.0845879	0.138243	0.0642489	0.164455
HTI	0.135039	0.132883	0.024139	0.106407	0.171091	0.086172	0.19347
JPN	0.180943	0.173995	0.0368148	0.142147	0.225023	0.117049	0.31067
NPL	0.121339	0.120505	0.0253403	0.0898545	0.154132	0.0643124	0.203643
BGR	0.134022	0.130481	0.0285098	0.0978461	0.170776	0.0803487	0.207628
DNK	0.118526	0.115891	0.0226105	0.0919527	0.148966	0.0805199	0.179762
MMR	0.142679	0.138081	0.0280889	0.110935	0.177999	0.0978613	0.240283
SWZ	0.112437	0.108275	0.0246749	0.0865104	0.147766	0.0658376	0.197109
CYP	0.136588	0.133713	0.0268817	0.105569	0.172791	0.0865813	0.216166
ROU	0.140886	0.137414	0.0291472	0.105132	0.178756	0.0790225	0.23329
DOM	0.118758	0.118644	0.0226404	0.0921446	0.15369	0.0716177	0.171525
BRA	0.113449	0.115015	0.0227705	0.0857711	0.142783	0.071389	0.164057
ITA	0.13016	0.129198	0.0243393	0.0990591	0.160875	0.0797153	0.206463
SYR	0.15216	0.150266	0.0326363	0.114174	0.197966	0.0774814	0.237144
CHL	0.0923797	0.091568	0.0177488	0.0713275	0.115344	0.0594998	0.148829
BEL	0.124829	0.122805	0.0244889	0.0934505	0.157795	0.0761218	0.204958
EST	0.119899	0.117076	0.0231642	0.0955849	0.147327	0.0656943	0.221361
LBN	0.176718	0.174373	0.0362046	0.133716	0.238448	0.112835	0.270272
GIN	0.143045	0.139426	0.0313576	0.105971	0.182507	0.0922303	0.248533
BRN	0.115789	0.110529	0.0239007	0.0900509	0.14965	0.0669506	0.177629
MNG	0.116032	0.113587	0.0231844	0.0893851	0.145235	0.0694763	0.17324
PRY	0.109568	0.108412	0.021664	0.0868469	0.138292	0.0662144	0.212402
USA	0.112028	0.108427	0.02302	0.0881072	0.147524	0.0634008	0.163488
RWA	0.123623	0.115684	0.028432	0.0953271	0.175433	0.0804486	0.193042
PRK	0.141952	0.137949	0.0264045	0.108365	0.175497	0.0867747	0.206813
NGA	0.12228	0.118199	0.0281858	0.0864195	0.159931	0.0694543	0.20887
BWA	0.0974601	0.0941222	0.0191913	0.0733162	0.123427	0.0666707	0.152013
NOR	0.159185	0.154894	0.0304149	0.126297	0.199407	0.0932293	0.242751
BIH	0.168712	0.166382	0.0336778	0.131976	0.216407	0.0927374	0.255045
BOL	0.150753	0.145575	0.0302389	0.117369	0.197663	0.0986681	0.256661
AZE	0.132827	0.130881	0.0282039	0.103692	0.167867	0.0797175	0.237594
BLR	0.187593	0.180778	0.0363038	0.149044	0.239713	0.0932043	0.286829
KOR	0.124495	0.125551	0.0257154	0.0928576	0.155544	0.0709431	0.214011
RUS	0.127169	0.125085	0.0251818	0.0977364	0.161157	0.0725176	0.196552
PER	0.11954	0.114033	0.0243122	0.0919223	0.152186	0.0766676	0.210192
VNM	0.117242	0.115433	0.0241633	0.0883974	0.144753	0.069297	0.220743
PSE	0.161216	0.160472	0.0339461	0.119861	0.206617	0.0955834	0.315526
TUN	0.126413	0.124549	0.0235573	0.097927	0.157485	0.0729053	0.189887
NLD	0.121753	0.118083	0.0235622	0.0922289	0.149692	0.0810094	0.183301
GTM	0.127391	0.120807	0.0286324	0.0948232	0.167646	0.0741082	0.215441
URY	0.0973902	0.0957046	0.0186957	0.072647	0.122666	0.0656351	0.161133
HRV	0.13985	0.136632	0.0357615	0.103383	0.179913	0.0775532	0.327367
IDN	0.117449	0.115244	0.0274393	0.0848921	0.148665	0.0690895	0.228407
LAO	0.134279	0.132688	0.0255568	0.103513	0.172482	0.0879935	0.199471
GUY	0.124027	0.122832	0.0252538	0.0925933	0.162092	0.0709141	0.186275
SLB	0.12896	0.126863	0.0269659	0.0979508	0.172749	0.0747696	0.210284
ISL	0.190622	0.184385	0.042231	0.145514	0.241976	0.109071	0.343308
MOZ	0.129287	0.12574	0.0274436	0.094728	0.165015	0.0825406	0.241684
MLI	0.118485	0.117269	0.0216496	0.0928365	0.142303	0.0820774	0.192244
PHL	0.110755	0.10643	0.0259777	0.083588	0.148727	0.0697114	0.18819
CAN	0.116575	0.116853	0.0202552	0.0918376	0.14022	0.079433	0.175966
CMR	0.133569	0.129915	0.0304968	0.0983898	0.172228	0.0709366	0.259559
FJI	0.122178	0.118565	0.0234311	0.0967808	0.153327	0.0816886	0.20486
CIV	0.120693	0.119177	0.026335	0.0908757	0.15481	0.0749997	0.217547
TUR	0.164447	0.161126	0.0352649	0.127184	0.201877	0.100235	0.290208
LBR	0.145516	0.143112	0.0274979	0.11078	0.186613	0.101592	0.219168
BEN	0.116006	0.113157	0.0233136	0.0889291	0.141765	0.0681478	0.180691

## Sheet: Stats_DAC
	mean	median	std	p10	p90	min	max
CHE	0.351734	0.338825	0.0778891	0.262362	0.455461	0.204465	0.62223
SLV	0.271722	0.26715	0.0677601	0.19306	0.354974	0.14386	0.581261
ARG	0.247841	0.246361	0.0570926	0.17845	0.320787	0.143001	0.427123
PAN	0.252278	0.243006	0.0619469	0.183839	0.337822	0.126008	0.465997
UKR	0.30446	0.291552	0.0774237	0.217698	0.40054	0.168659	0.552854
GEO	0.257878	0.253847	0.0636137	0.182538	0.345256	0.142682	0.409974
CUB	0.278637	0.267528	0.0672808	0.199503	0.363115	0.136626	0.491838
ECU	0.288447	0.287066	0.0597397	0.214323	0.356381	0.167843	0.479709
DEU	0.274459	0.267354	0.0571608	0.213848	0.34621	0.168262	0.481003
BFA	0.219149	0.213924	0.0449576	0.160174	0.294301	0.121861	0.337938
MDG	0.208303	0.203502	0.0492043	0.15382	0.287888	0.112195	0.341144
KGZ	0.268412	0.247666	0.0863557	0.178686	0.371762	0.152519	0.681561
IRQ	0.240371	0.234754	0.0578997	0.165691	0.312883	0.142968	0.414692
SOM	0.229813	0.226274	0.0530998	0.170312	0.289	0.130736	0.413336
NAM	0.217146	0.212112	0.0501057	0.159235	0.28534	0.117076	0.394032
ARE	0.219995	0.214248	0.054512	0.154203	0.295046	0.12875	0.349783
HUN	0.263887	0.253638	0.0663799	0.187239	0.341035	0.141798	0.590589
SEN	0.203927	0.201406	0.0451487	0.1446	0.26425	0.131138	0.332109
LBY	0.199259	0.190709	0.0525938	0.146617	0.273404	0.0821304	0.396916
SDN	0.23731	0.228917	0.0558367	0.177039	0.30663	0.138568	0.50103
MYS	0.243215	0.240639	0.0550438	0.178941	0.319401	0.111811	0.389749
SUR	0.267016	0.259151	0.0746358	0.186508	0.369107	0.136646	0.551103
BLZ	0.277982	0.274117	0.0691344	0.192881	0.376598	0.13054	0.460591
SVN	0.310119	0.297809	0.0615716	0.230185	0.40225	0.196464	0.460966
CZE	0.266696	0.254237	0.0698342	0.184214	0.359562	0.11131	0.500418
IRN	0.229949	0.222735	0.0572812	0.161801	0.301457	0.120401	0.444794
SLE	0.251217	0.245799	0.0609288	0.184463	0.320268	0.126975	0.435439
JOR	0.225354	0.21419	0.0604712	0.163811	0.292277	0.115532	0.42025
LTU	0.253137	0.247031	0.063371	0.188616	0.328916	0.14218	0.578781
SWE	0.239171	0.232475	0.0614412	0.162111	0.337052	0.130519	0.424631
POL	0.26928	0.25683	0.0614941	0.201603	0.36292	0.172937	0.450999
TZA	0.231484	0.227912	0.0573285	0.161273	0.302906	0.105943	0.386157
VEN	0.351698	0.340652	0.0753002	0.264408	0.440904	0.196913	0.649938
KEN	0.212846	0.197221	0.0552602	0.155288	0.297089	0.0967145	0.381881
SVK	0.271975	0.266478	0.0646724	0.195222	0.343983	0.169942	0.473688
GBR	0.283253	0.274869	0.071031	0.204989	0.369491	0.15294	0.578767
MAR	0.208488	0.198285	0.0534835	0.151397	0.270155	0.119876	0.437577
AGO	0.251346	0.240848	0.0626837	0.180036	0.337345	0.124744	0.431817
KWT	0.187981	0.180472	0.0498511	0.131938	0.250439	0.0962798	0.386694
UGA	0.259308	0.256276	0.0662269	0.189295	0.346564	0.153114	0.478574
KHM	0.224479	0.21901	0.0547127	0.157231	0.299453	0.113703	0.391441
COD	0.252198	0.238926	0.0610664	0.186146	0.337236	0.144822	0.439309
QAT	0.18835	0.179293	0.045138	0.142817	0.245099	0.116287	0.347326
BGD	0.246683	0.231069	0.067927	0.172695	0.332801	0.148614	0.561014
GRC	0.30942	0.289255	0.0802452	0.233714	0.417503	0.158621	0.561798
IND	0.289092	0.271957	0.0749295	0.206908	0.384562	0.154401	0.534442
MDA	0.28053	0.262568	0.0739661	0.203099	0.389105	0.159416	0.517042
GAB	0.272153	0.269075	0.0705413	0.184475	0.370182	0.140784	0.518846
MWI	0.215545	0.210633	0.0481627	0.161238	0.264052	0.104327	0.421218
EGY	0.231337	0.217642	0.0524854	0.170456	0.293126	0.147666	0.383932
MNE	0.323121	0.310667	0.0780075	0.226975	0.427233	0.162643	0.53355
ZAF	0.209354	0.199147	0.057957	0.139818	0.275151	0.111158	0.426098
MKD	0.318339	0.304591	0.0924779	0.214955	0.420887	0.161795	0.718054
BHS	0.223669	0.220553	0.0509931	0.162141	0.289382	0.131087	0.36017
ZWE	0.230431	0.224336	0.0575476	0.16644	0.303875	0.12649	0.436011
IRL	0.275383	0.265811	0.0544119	0.209517	0.34061	0.1637	0.457114
LKA	0.234846	0.23009	0.0568593	0.16514	0.301753	0.13238	0.396243
SRB	0.306473	0.287235	0.0814723	0.227662	0.408382	0.188878	0.581471
COG	0.265644	0.254112	0.0707304	0.178427	0.350971	0.111501	0.45853
NZL	0.245	0.239514	0.0569944	0.174583	0.328135	0.140277	0.39983
LVA	0.25087	0.238576	0.0579911	0.182953	0.332772	0.155709	0.429567
AUS	0.244364	0.234232	0.0524525	0.186895	0.315432	0.133077	0.409493
FLK	0.357629	0.350242	0.085234	0.261983	0.459003	0.208217	0.637781
ISR	0.228998	0.217123	0.0479192	0.170902	0.290721	0.138228	0.401177
COL	0.232255	0.22546	0.0570453	0.15941	0.306519	0.0885305	0.354986
FIN	0.406828	0.382282	0.11128	0.288689	0.609383	0.216709	0.750507
GMB	0.208339	0.204432	0.053559	0.143946	0.266338	0.108282	0.454044
PRT	0.263236	0.256483	0.0651541	0.185734	0.330836	0.154411	0.562244
SAU	0.242214	0.241571	0.0556925	0.182596	0.301263	0.142578	0.473432
PNG	0.240631	0.233457	0.0647656	0.166958	0.328831	0.11413	0.457081
JAM	0.237686	0.225039	0.063357	0.169933	0.318271	0.113609	0.502755
PAK	0.240724	0.226836	0.0556474	0.183474	0.31648	0.14821	0.465574
ZMB	0.242945	0.22944	0.0739598	0.169992	0.323874	0.139811	0.628727
CHN	0.210796	0.199237	0.0500848	0.15251	0.279238	0.118362	0.37254
KAZ	0.252128	0.244436	0.0669688	0.174377	0.336939	0.13777	0.464123
ARM	0.277351	0.262553	0.0942936	0.173436	0.391714	0.149385	0.635319
LUX	0.289074	0.285883	0.0588327	0.221293	0.362844	0.175065	0.470824
ALB	0.314547	0.30616	0.0660929	0.233452	0.406461	0.189747	0.517258
HND	0.255052	0.238602	0.074416	0.179644	0.364072	0.132004	0.531041
NIC	0.239798	0.230606	0.0580246	0.184104	0.338083	0.133835	0.412173
NER	0.203973	0.197298	0.0522205	0.148771	0.274587	0.117602	0.412892
ETH	0.254981	0.247531	0.05279	0.187694	0.326549	0.167438	0.38906
GRL	0.381499	0.377565	0.0935203	0.259422	0.506204	0.229875	0.715226
OMN	0.243288	0.236848	0.0581016	0.177388	0.330987	0.144552	0.414668
ESP	0.268505	0.26314	0.0531934	0.210295	0.34407	0.163559	0.41426
TJK	0.272272	0.259843	0.0659109	0.196244	0.354811	0.168052	0.468542
YEM	0.273438	0.268196	0.061559	0.205184	0.350913	0.178532	0.528573
THA	0.229929	0.221768	0.0536769	0.167712	0.299064	0.137596	0.472378
UZB	0.256117	0.236896	0.0668888	0.187395	0.337407	0.134698	0.469805
DZA	0.221322	0.20602	0.0621581	0.145777	0.313805	0.128197	0.402022
FRA	0.277184	0.262541	0.0629786	0.199357	0.371629	0.178511	0.450029
CRI	0.273361	0.266674	0.0706112	0.192934	0.369966	0.144552	0.534416
AUT	0.258541	0.242716	0.0804858	0.171788	0.345475	0.113348	0.612429
GHA	0.263838	0.256445	0.0658133	0.183833	0.356644	0.138738	0.471251
MEX	0.237518	0.227893	0.0609621	0.168961	0.31266	0.153809	0.445225
HTI	0.237013	0.231007	0.0538802	0.173397	0.301292	0.141406	0.421473
JPN	0.426058	0.41319	0.104562	0.303937	0.557106	0.216898	0.789352
NPL	0.238912	0.24039	0.0566648	0.167026	0.312018	0.137995	0.433416
BGR	0.275327	0.272858	0.0664675	0.199091	0.35354	0.140293	0.511666
DNK	0.261337	0.254096	0.0579619	0.194752	0.328371	0.155694	0.464064
MMR	0.264581	0.254051	0.0712116	0.185406	0.349393	0.112318	0.554926
SWZ	0.203327	0.195696	0.0559054	0.148046	0.263716	0.102603	0.417754
CYP	0.305305	0.303447	0.0633575	0.225922	0.383288	0.188655	0.52248
ROU	0.300027	0.286008	0.0722034	0.222816	0.386235	0.132844	0.525471
DOM	0.23629	0.222638	0.0596769	0.176131	0.302627	0.127286	0.461742
BRA	0.226388	0.216722	0.054769	0.16679	0.294285	0.134937	0.423733
ITA	0.284687	0.267364	0.0767849	0.218345	0.344149	0.169223	0.738748
SYR	0.229262	0.229599	0.0518117	0.169411	0.282481	0.122572	0.401107
CHL	0.188986	0.182595	0.0439856	0.13789	0.244684	0.121769	0.352862
BEL	0.267419	0.26626	0.051677	0.203535	0.327523	0.147356	0.418876
EST	0.256199	0.246878	0.070785	0.182501	0.328983	0.137705	0.540003
LBN	0.30078	0.283928	0.0698941	0.227821	0.402181	0.144748	0.501249
GIN	0.256364	0.243098	0.0646342	0.188878	0.341189	0.139541	0.475188
BRN	0.245223	0.248941	0.0555517	0.167144	0.314776	0.13305	0.417604
MNG	0.236877	0.225534	0.0602875	0.172601	0.321417	0.12085	0.457938
PRY	0.218966	0.209479	0.0568818	0.153406	0.291605	0.126571	0.466061
USA	0.240844	0.242541	0.0538119	0.175687	0.309959	0.114134	0.436556
RWA	0.245465	0.234588	0.0602411	0.178448	0.321477	0.130165	0.495008
PRK	0.240336	0.236505	0.0515217	0.184326	0.320742	0.154258	0.376275
NGA	0.225656	0.210754	0.065864	0.154142	0.315444	0.126183	0.53036
BWA	0.192716	0.184715	0.0492564	0.140305	0.262414	0.0999793	0.389215
NOR	0.358125	0.350478	0.0820002	0.259995	0.468462	0.21429	0.590108
BIH	0.33659	0.332144	0.0786421	0.241077	0.41795	0.195682	0.638489
BOL	0.266831	0.260966	0.0523761	0.212174	0.33741	0.148415	0.456221
AZE	0.28709	0.277605	0.0742069	0.213973	0.379761	0.144347	0.566704
BLR	0.307626	0.296235	0.068316	0.21667	0.395945	0.156764	0.490994
KOR	0.258714	0.250871	0.0543746	0.19495	0.324549	0.137323	0.43167
RUS	0.280741	0.268505	0.0834872	0.189845	0.40698	0.135922	0.555895
PER	0.246168	0.237059	0.0632689	0.167591	0.332741	0.14715	0.459142
VNM	0.240739	0.226015	0.0633019	0.174928	0.333705	0.126441	0.455771
PSE	0.257256	0.24753	0.0657834	0.183579	0.331563	0.149489	0.529747
TUN	0.225772	0.219378	0.0614603	0.15992	0.296445	0.110933	0.487091
NLD	0.265455	0.253579	0.0617073	0.202185	0.338075	0.144101	0.531553
GTM	0.253066	0.243438	0.0585954	0.18916	0.330172	0.126669	0.430624
URY	0.199641	0.190551	0.0458955	0.150535	0.262645	0.120401	0.310219
HRV	0.277209	0.270541	0.0674916	0.19724	0.36382	0.153251	0.481193
IDN	0.244904	0.238481	0.0566859	0.176892	0.328175	0.155406	0.395525
LAO	0.237689	0.226167	0.0639808	0.174162	0.306231	0.147652	0.54973
GUY	0.262388	0.259369	0.0642982	0.19775	0.346105	0.1121	0.457653
SLB	0.23399	0.230801	0.0473863	0.175491	0.292437	0.150953	0.394012
ISL	0.439558	0.421016	0.107908	0.333311	0.610203	0.243955	0.717352
MOZ	0.231716	0.22638	0.0581523	0.161194	0.304947	0.115468	0.384018
MLI	0.200975	0.193826	0.0477542	0.150776	0.254449	0.0781875	0.376857
PHL	0.226232	0.216404	0.0567333	0.160706	0.304616	0.0812183	0.382471
CAN	0.247935	0.241348	0.0546277	0.189117	0.314547	0.145035	0.477579
CMR	0.249581	0.238982	0.0641735	0.168843	0.336579	0.132065	0.454661
FJI	0.243349	0.235242	0.0610535	0.177931	0.328465	0.150571	0.487909
CIV	0.242906	0.236651	0.0560209	0.177632	0.313188	0.139857	0.449374
TUR	0.340152	0.330012	0.0772361	0.242317	0.422799	0.190992	0.633274
LBR	0.259334	0.255283	0.0630716	0.188666	0.34608	0.161643	0.486764
BEN	0.241359	0.235561	0.0632998	0.165065	0.325846	0.118137	0.410345

## Sheet: Stats_AD
	mean	median	std	p10	p90	min	max
CHE	0.138561	0.136788	0.0189037	0.11154	0.164249	0.102711	0.18825
SLV	0.105134	0.104564	0.0133372	0.0880116	0.122861	0.0708064	0.134495
ARG	0.0958583	0.0944113	0.0147279	0.0787207	0.115421	0.0632356	0.133294
PAN	0.0968493	0.0952244	0.0115236	0.0830098	0.113881	0.0731708	0.124615
UKR	0.129599	0.127924	0.0199323	0.107013	0.157574	0.095683	0.209844
GEO	0.0852301	0.0850742	0.00998743	0.0729532	0.097664	0.0607977	0.108326
CUB	0.121764	0.121176	0.018772	0.0993778	0.145234	0.0833304	0.169783
ECU	0.100783	0.0994211	0.0161616	0.0810481	0.122309	0.0704605	0.142425
DEU	0.135997	0.133447	0.015993	0.115408	0.156033	0.106366	0.183701
BFA	0.0817904	0.0812609	0.0128859	0.0666627	0.0989844	0.0581683	0.116979
MDG	0.0748545	0.0735381	0.0103114	0.0628685	0.0891882	0.0536676	0.0999522
KGZ	0.0962899	0.0948636	0.0119799	0.0821208	0.111794	0.0704435	0.1272
IRQ	0.104836	0.103115	0.013627	0.0882256	0.122532	0.0825691	0.14085
SOM	0.0958855	0.0947208	0.0151138	0.0757132	0.115701	0.0662141	0.140539
NAM	0.0789085	0.077869	0.0108501	0.0644515	0.0935087	0.0579806	0.107594
ARE	0.0955833	0.0942407	0.0124515	0.0823293	0.113729	0.069411	0.141871
HUN	0.102602	0.101317	0.0117806	0.0892904	0.11978	0.0813154	0.137497
SEN	0.059827	0.0587382	0.00933577	0.0475492	0.0735245	0.0420831	0.0816384
LBY	0.0712116	0.0707756	0.00834006	0.0616076	0.0827123	0.0565117	0.0931177
SDN	0.104935	0.100893	0.0223959	0.0773156	0.133276	0.0650008	0.173889
MYS	0.0672619	0.066588	0.010243	0.0546067	0.0821558	0.0459721	0.0947759
SUR	0.0815509	0.0802601	0.0134342	0.066158	0.100793	0.0584036	0.126212
BLZ	0.111341	0.11125	0.0139839	0.0932301	0.128957	0.0812776	0.144855
SVN	0.128845	0.12583	0.016113	0.110233	0.150452	0.0994229	0.172467
CZE	0.0906489	0.0897058	0.0116282	0.0759046	0.106047	0.0679705	0.13213
IRN	0.0979781	0.0967186	0.0128787	0.0836023	0.115059	0.0740916	0.132925
SLE	0.0853514	0.0825575	0.0139132	0.0695927	0.106076	0.0582424	0.125319
JOR	0.0960094	0.0952393	0.0117827	0.0811686	0.110378	0.0747715	0.1381
LTU	0.105844	0.104223	0.0137591	0.0892142	0.125066	0.0771057	0.145012
SWE	0.0957747	0.0941343	0.0105735	0.0833065	0.110359	0.0762457	0.125675
POL	0.112804	0.110366	0.0140387	0.0958763	0.131988	0.0876496	0.154454
TZA	0.0761777	0.0755006	0.0106556	0.0651052	0.0868813	0.052287	0.114176
VEN	0.122272	0.120524	0.0204942	0.0959016	0.148125	0.0840077	0.189736
KEN	0.113523	0.112646	0.0133496	0.0983046	0.131997	0.0881622	0.16071
SVK	0.112729	0.11088	0.0134278	0.0956691	0.129175	0.0853404	0.148229
GBR	0.145303	0.143792	0.0182879	0.125186	0.172929	0.113846	0.186763
MAR	0.0775987	0.0772709	0.0107807	0.0642306	0.0928407	0.0575812	0.108237
AGO	0.0818459	0.0812984	0.013125	0.0650829	0.0970897	0.0557633	0.123896
KWT	0.081805	0.0804293	0.00880981	0.0707928	0.0930313	0.0666623	0.108787
UGA	0.066549	0.0647907	0.0115127	0.0531138	0.0806332	0.0486609	0.112332
KHM	0.089855	0.0889945	0.0118868	0.0752006	0.106094	0.0680224	0.121542
COD	0.0957433	0.0933271	0.0116984	0.0821065	0.111305	0.0665799	0.124312
QAT	0.0811088	0.0798009	0.0083412	0.0719028	0.0933595	0.0634963	0.101254
BGD	0.0948778	0.0939095	0.0109695	0.0809217	0.109999	0.0758342	0.123168
GRC	0.11981	0.118433	0.0139834	0.103396	0.139737	0.088711	0.163415
IND	0.0749389	0.0750214	0.010242	0.0622639	0.0884365	0.0515418	0.103614
MDA	0.106948	0.102888	0.0163296	0.087521	0.130681	0.0778429	0.153363
GAB	0.100391	0.100074	0.0141432	0.0823276	0.11732	0.0716301	0.145263
MWI	0.0841913	0.0837161	0.0119224	0.0690274	0.099546	0.0563391	0.112786
EGY	0.0822684	0.0810704	0.0131723	0.0669343	0.0995718	0.0580653	0.115358
MNE	0.110735	0.109967	0.0138921	0.0931142	0.129678	0.0758208	0.150687
ZAF	0.0751629	0.0754796	0.00969903	0.0629445	0.0872707	0.0585564	0.1034
MKD	0.103157	0.101782	0.0132049	0.0886364	0.1187	0.0740523	0.152599
BHS	0.10074	0.100547	0.0120741	0.0841267	0.117509	0.0787872	0.130775
ZWE	0.0862004	0.0836068	0.0133034	0.0721821	0.101133	0.0577216	0.127163
IRL	0.134079	0.132821	0.0165533	0.11403	0.158105	0.103795	0.190606
LKA	0.109595	0.107019	0.0162142	0.0901293	0.131979	0.0799537	0.158046
SRB	0.106921	0.106375	0.0123116	0.0922234	0.121077	0.0798966	0.145904
COG	0.0930814	0.0910078	0.0155562	0.0741899	0.113312	0.0613935	0.145236
NZL	0.113896	0.112143	0.0145861	0.0948897	0.136484	0.0880933	0.153932
LVA	0.111492	0.112651	0.012799	0.0948741	0.128747	0.0899291	0.146123
AUS	0.114737	0.113843	0.0145725	0.0955704	0.134133	0.0875701	0.159406
FLK	0.107506	0.106241	0.0133419	0.0917908	0.121664	0.0840052	0.164593
ISR	0.101062	0.0984804	0.0130544	0.0851866	0.119395	0.0806695	0.136199
COL	0.0737996	0.074052	0.0109149	0.0593799	0.0850358	0.0536838	0.113665
FIN	0.124429	0.121563	0.0149648	0.105554	0.145148	0.100536	0.174978
GMB	0.0714998	0.0712645	0.00908961	0.0595269	0.0816425	0.0524028	0.0999936
PRT	0.118325	0.11698	0.0138855	0.101502	0.138521	0.0910715	0.15038
SAU	0.108546	0.105331	0.0147455	0.0912579	0.130376	0.0822149	0.147473
PNG	0.0941593	0.0945999	0.0118282	0.0778113	0.109485	0.0655996	0.122036
JAM	0.0977836	0.0974129	0.0118712	0.0834918	0.113968	0.0752216	0.134439
PAK	0.107719	0.108346	0.0145447	0.0883417	0.125755	0.0768864	0.150109
ZMB	0.0863033	0.0846424	0.0143661	0.0706424	0.108479	0.060148	0.13519
CHN	0.0641704	0.0641609	0.00848595	0.0537802	0.0764219	0.0477347	0.084473
KAZ	0.0895294	0.0880009	0.0106915	0.0778452	0.101756	0.0686109	0.122386
ARM	0.0944676	0.0933258	0.0104238	0.0821654	0.10862	0.0736861	0.125451
LUX	0.133915	0.130884	0.0181641	0.112178	0.157815	0.103877	0.183996
ALB	0.100758	0.100475	0.0117377	0.0865383	0.117583	0.0761054	0.130105
HND	0.102816	0.0998515	0.0128689	0.0865208	0.120246	0.0768135	0.133189
NIC	0.0734998	0.0720739	0.0120563	0.0592263	0.0918277	0.047084	0.106011
NER	0.0869128	0.0872874	0.0135579	0.0696651	0.102716	0.0593	0.128173
ETH	0.0989524	0.0958401	0.0158151	0.080472	0.120877	0.0648624	0.143581
GRL	0.10207	0.101248	0.0124837	0.0879089	0.117197	0.0739561	0.139789
OMN	0.1072	0.105853	0.0133131	0.0907165	0.124859	0.0802705	0.144956
ESP	0.135971	0.13608	0.0158805	0.11809	0.15839	0.103189	0.181082
TJK	0.0965615	0.0957442	0.0128699	0.0805486	0.111314	0.0718497	0.137712
YEM	0.12	0.117968	0.0182261	0.0976864	0.14527	0.0800069	0.17146
THA	0.067661	0.0671161	0.00999917	0.0557803	0.0797872	0.0501162	0.0967193
UZB	0.0916305	0.0913308	0.00984961	0.079295	0.106423	0.0719321	0.119293
DZA	0.0748239	0.0748081	0.0101107	0.0622107	0.0869607	0.0529648	0.101107
FRA	0.145541	0.144009	0.016161	0.124811	0.163933	0.111404	0.195422
CRI	0.103898	0.102572	0.0123825	0.0871244	0.119315	0.0794698	0.135232
AUT	0.113137	0.112662	0.0119743	0.0998141	0.126814	0.0853405	0.156609
GHA	0.091804	0.0902015	0.0136199	0.0763651	0.109104	0.0618271	0.139014
MEX	0.0676584	0.0666999	0.00784137	0.0592395	0.0766978	0.052322	0.0920189
HTI	0.107798	0.105218	0.0157698	0.0921063	0.131022	0.0772267	0.15153
JPN	0.168687	0.16678	0.0195027	0.145793	0.195828	0.127591	0.213172
NPL	0.093074	0.0912208	0.0109595	0.0803318	0.105874	0.0687892	0.126368
BGR	0.113567	0.110972	0.0121246	0.0994736	0.129477	0.0903925	0.145789
DNK	0.145079	0.143203	0.0168224	0.12454	0.16838	0.111865	0.191329
MMR	0.105652	0.1049	0.0147113	0.0888317	0.127255	0.0765522	0.146775
SWZ	0.0746868	0.0740939	0.0116785	0.0606292	0.0929452	0.0534093	0.106533
CYP	0.121035	0.120415	0.0135482	0.10358	0.140152	0.0974113	0.156976
ROU	0.125387	0.123718	0.0143604	0.108881	0.144873	0.0997478	0.168222
DOM	0.0979448	0.0976682	0.0121217	0.083508	0.113624	0.0722397	0.129575
BRA	0.0714581	0.0714737	0.00853271	0.0613229	0.0822156	0.0522943	0.0977428
ITA	0.104868	0.104579	0.0134868	0.0889072	0.125648	0.078578	0.138945
SYR	0.122915	0.122163	0.0204114	0.0963231	0.146263	0.0786025	0.183184
CHL	0.0708864	0.0705548	0.00960184	0.059228	0.0846078	0.0546911	0.0943224
BEL	0.130893	0.129371	0.0164249	0.108233	0.15412	0.0997772	0.174605
EST	0.110304	0.109258	0.0125907	0.0960834	0.127948	0.0861103	0.14412
LBN	0.131936	0.129766	0.0207556	0.108168	0.156501	0.0957068	0.194919
GIN	0.088075	0.087761	0.0134513	0.0712074	0.106762	0.0614041	0.119156
BRN	0.0915376	0.0901636	0.0109822	0.0762787	0.106394	0.0737344	0.120244
MNG	0.0975487	0.0954293	0.0129116	0.083301	0.116871	0.0721054	0.139157
PRY	0.0767491	0.0758891	0.0106202	0.0630579	0.0907166	0.0571946	0.10562
USA	0.102006	0.102223	0.0112078	0.0881711	0.118892	0.0792827	0.126547
RWA	0.0752999	0.0737755	0.0102717	0.0645295	0.0900705	0.0543078	0.0977575
PRK	0.11856	0.117399	0.0165244	0.0988446	0.141024	0.0876635	0.163543
NGA	0.0818142	0.0798472	0.0134013	0.0655845	0.097603	0.0600736	0.126046
BWA	0.0676745	0.0671021	0.0085129	0.0562431	0.079071	0.0507543	0.0853721
NOR	0.127685	0.127282	0.0189968	0.1057	0.151663	0.0931606	0.185794
BIH	0.11044	0.108857	0.0146009	0.090892	0.130825	0.0792283	0.14827
BOL	0.100004	0.0975645	0.0168302	0.0785014	0.122107	0.0673227	0.15053
AZE	0.098118	0.0975361	0.0127122	0.0829343	0.114098	0.067707	0.128658
BLR	0.135471	0.134383	0.0208885	0.110091	0.164012	0.085489	0.188824
KOR	0.103921	0.10284	0.0141217	0.08614	0.124876	0.0744131	0.13831
RUS	0.0945899	0.0931266	0.011156	0.0815453	0.108916	0.0758927	0.124952
PER	0.0717123	0.0704362	0.00994957	0.0599345	0.0862176	0.0557929	0.0967202
VNM	0.0854343	0.0848729	0.0103375	0.0732984	0.100234	0.0620551	0.110655
PSE	0.133656	0.131829	0.021811	0.106595	0.162431	0.0878857	0.192773
TUN	0.0917735	0.0895374	0.0151444	0.0736591	0.113675	0.0622777	0.1375
NLD	0.125203	0.123505	0.0171621	0.104279	0.1487	0.0963062	0.17755
GTM	0.0982643	0.0972135	0.0116956	0.0839424	0.114137	0.0708849	0.133705
URY	0.0693657	0.0678726	0.00958882	0.0573198	0.0827179	0.0512564	0.0930792
HRV	0.11846	0.116713	0.0132557	0.102588	0.139549	0.0942439	0.151444
IDN	0.0867931	0.0859858	0.0114198	0.0737965	0.101875	0.0643003	0.117268
LAO	0.106213	0.10433	0.0130508	0.0904561	0.124701	0.0794663	0.146556
GUY	0.0730171	0.0727522	0.00971836	0.0608313	0.0866114	0.0549105	0.0936325
SLB	0.0980196	0.0985047	0.0122413	0.0807571	0.112145	0.0716716	0.131034
ISL	0.127676	0.126369	0.0163168	0.109463	0.148093	0.094576	0.173133
MOZ	0.0849503	0.0822887	0.0148703	0.0683696	0.10656	0.0563527	0.119298
MLI	0.0858728	0.0840086	0.013356	0.0700201	0.104198	0.0603048	0.125218
PHL	0.0786357	0.0793399	0.00919884	0.0675544	0.0884158	0.0575854	0.10985
CAN	0.12063	0.118562	0.0152348	0.10286	0.145016	0.0941552	0.165847
CMR	0.0841018	0.0834769	0.0128488	0.0695933	0.0983521	0.0528836	0.12565
FJI	0.101697	0.100398	0.0119557	0.0879913	0.117866	0.076743	0.1354
CIV	0.0736868	0.0725939	0.0100868	0.0618935	0.086762	0.0587203	0.115323
TUR	0.121604	0.118876	0.0163075	0.101434	0.14202	0.0888942	0.163137
LBR	0.086966	0.0863164	0.0138001	0.0704264	0.100889	0.0569381	0.140166
BEN	0.0751787	0.0739673	0.0106363	0.0631283	0.0885767	0.0534261	0.117899

## Sheet: Stats_AE
	mean	median	std	p10	p90	min	max
CHE	0.122614	0.121601	0.02615	0.0935368	0.156283	0.0640124	0.210997
SLV	0.110434	0.109214	0.0221724	0.0787888	0.142291	0.0701312	0.169076
ARG	0.114403	0.110762	0.0246908	0.0863048	0.150651	0.0640614	0.187527
PAN	0.0982911	0.0946536	0.0214767	0.0735424	0.12875	0.0574739	0.153831
UKR	0.128817	0.125772	0.0253972	0.100842	0.164221	0.07983	0.1874
GEO	0.107082	0.103045	0.0227497	0.0779886	0.138463	0.0558913	0.15423
CUB	0.123891	0.122827	0.0262407	0.0945473	0.153085	0.0764366	0.232954
ECU	0.123361	0.118462	0.0288275	0.092899	0.166383	0.0713547	0.21569
DEU	0.0960667	0.0926088	0.0213817	0.0700552	0.123323	0.0558656	0.151374
BFA	0.100964	0.0996005	0.0192504	0.0778979	0.122861	0.0633363	0.173492
MDG	0.0934088	0.0912428	0.0215095	0.0703891	0.122383	0.0554016	0.172317
KGZ	0.113958	0.108505	0.0270447	0.0802502	0.151599	0.0714332	0.18325
IRQ	0.104591	0.101745	0.0227241	0.0809443	0.13566	0.0605737	0.161138
SOM	0.0982842	0.0961077	0.0195007	0.074398	0.126896	0.0640905	0.144335
NAM	0.0906258	0.0906945	0.0178508	0.0681937	0.11165	0.0519267	0.143709
ARE	0.0871718	0.0865882	0.0177212	0.0661512	0.109998	0.0459069	0.132218
HUN	0.100146	0.0960948	0.021709	0.0777722	0.123941	0.0579689	0.185232
SEN	0.0906292	0.0860275	0.0225762	0.0674616	0.120241	0.0595474	0.186978
LBY	0.0796324	0.0775667	0.0165049	0.0598432	0.100871	0.0493987	0.133456
SDN	0.121985	0.120895	0.0284788	0.0878023	0.157808	0.0600525	0.195128
MYS	0.0961224	0.0923951	0.0210757	0.0701467	0.125279	0.0504138	0.156537
SUR	0.115689	0.111731	0.0294841	0.0841164	0.149538	0.0689485	0.232527
BLZ	0.120191	0.122118	0.0255737	0.0898856	0.150877	0.0661307	0.2227
SVN	0.120608	0.117343	0.0282837	0.0871613	0.166032	0.066502	0.197938
CZE	0.0982467	0.091317	0.0256316	0.0712915	0.129789	0.0566418	0.204727
IRN	0.100163	0.0986449	0.0219452	0.0746192	0.129164	0.0568776	0.173513
SLE	0.113293	0.113139	0.0219632	0.0836571	0.140046	0.0736469	0.186153
JOR	0.0929812	0.0905263	0.0186981	0.0695924	0.117129	0.0539951	0.140133
LTU	0.0991172	0.0976913	0.0183822	0.0769641	0.123567	0.0658067	0.155975
SWE	0.0943787	0.0925979	0.0203476	0.0698653	0.120818	0.0392426	0.156474
POL	0.10002	0.0968847	0.0218732	0.0738991	0.131417	0.061507	0.158328
TZA	0.0981672	0.0951571	0.0246153	0.0687891	0.133499	0.0574939	0.157657
VEN	0.151769	0.146879	0.0297614	0.116277	0.196329	0.0967219	0.2461
KEN	0.0993409	0.0966934	0.0183185	0.0781525	0.12059	0.0695314	0.158765
SVK	0.103841	0.0982835	0.0246328	0.0757996	0.13403	0.0635282	0.204665
GBR	0.0990498	0.0963307	0.022548	0.0739959	0.129279	0.0556724	0.170804
MAR	0.0848777	0.0809271	0.0199436	0.0604294	0.113063	0.0460457	0.148449
AGO	0.109715	0.102011	0.0259865	0.0830513	0.14739	0.0604248	0.183585
KWT	0.078399	0.0767339	0.0176508	0.0584146	0.104389	0.0483337	0.128722
UGA	0.106942	0.103587	0.023047	0.0799295	0.138919	0.060497	0.177859
KHM	0.0984973	0.0965665	0.0235426	0.0714636	0.123577	0.0591302	0.179385
COD	0.110514	0.108816	0.0229989	0.0866385	0.142685	0.0645604	0.180711
QAT	0.0803212	0.076655	0.0153705	0.064851	0.102378	0.0519013	0.137839
BGD	0.103419	0.0997697	0.0209517	0.0791615	0.128073	0.0719586	0.202098
GRC	0.110403	0.107301	0.02728	0.0817535	0.145225	0.0568545	0.220527
IND	0.114743	0.112375	0.0275784	0.0824724	0.154708	0.0634345	0.189802
MDA	0.112777	0.107927	0.0267059	0.0865721	0.14541	0.0632667	0.197595
GAB	0.119466	0.115837	0.0268136	0.0923103	0.150644	0.0667184	0.2428
MWI	0.101308	0.0982846	0.0226249	0.0776989	0.127659	0.0516289	0.179583
EGY	0.102702	0.0991463	0.0195656	0.0830617	0.126959	0.0581242	0.170851
MNE	0.128673	0.125142	0.0320573	0.0921891	0.16177	0.0783158	0.280512
ZAF	0.0845138	0.0814986	0.0175042	0.0642725	0.108919	0.0538328	0.135568
MKD	0.122289	0.121285	0.0268304	0.088714	0.156725	0.0690019	0.202023
BHS	0.0888372	0.0870976	0.0179418	0.0685684	0.115716	0.0535091	0.125389
ZWE	0.101745	0.096829	0.0222462	0.077103	0.133574	0.0624414	0.159891
IRL	0.0992133	0.0977657	0.0220846	0.0744152	0.131019	0.0562536	0.171302
LKA	0.114141	0.110678	0.0243074	0.0848897	0.147313	0.0670435	0.185729
SRB	0.12367	0.119875	0.0297767	0.0908711	0.165119	0.0780877	0.209795
COG	0.114999	0.11224	0.0235952	0.0865295	0.149694	0.0687812	0.176428
NZL	0.0881822	0.0878633	0.0155304	0.0693644	0.105282	0.0606545	0.146881
LVA	0.101837	0.096998	0.0271305	0.0742222	0.134553	0.0600726	0.191719
AUS	0.0853416	0.0803487	0.017562	0.0642397	0.109988	0.0514752	0.131341
FLK	0.140374	0.135001	0.0307834	0.10284	0.186444	0.0852189	0.21411
ISR	0.0849407	0.0817511	0.0177321	0.0635079	0.106585	0.056435	0.142813
COL	0.0911092	0.0893362	0.0198108	0.0697291	0.109703	0.060263	0.17629
FIN	0.144975	0.141869	0.0347418	0.103243	0.189072	0.0840694	0.281881
GMB	0.0923794	0.0882337	0.0217151	0.0694551	0.12552	0.0619716	0.173239
PRT	0.102253	0.100076	0.0215229	0.0764558	0.131994	0.0644005	0.174925
SAU	0.0852156	0.083512	0.0163209	0.0652844	0.107806	0.0544373	0.132936
PNG	0.103187	0.100339	0.0216685	0.0767924	0.131587	0.0479907	0.165941
JAM	0.0984197	0.0948655	0.0226552	0.0744098	0.128437	0.0639066	0.197511
PAK	0.109192	0.10762	0.0206389	0.0855468	0.1349	0.0740422	0.179577
ZMB	0.107454	0.106092	0.0221916	0.0820188	0.138972	0.0648356	0.180232
CHN	0.0854067	0.0846828	0.0161253	0.0657458	0.105178	0.0548137	0.146959
KAZ	0.0981308	0.096943	0.0201203	0.075426	0.123226	0.0512002	0.158712
ARM	0.107278	0.102606	0.0242441	0.0788493	0.14243	0.0662842	0.17893
LUX	0.101549	0.0986726	0.0213251	0.0794665	0.130196	0.0610484	0.180248
ALB	0.121243	0.11593	0.0289202	0.0911443	0.160321	0.0619924	0.208037
HND	0.100085	0.0977414	0.0181746	0.078323	0.126601	0.0688989	0.142219
NIC	0.100953	0.0992373	0.0193752	0.0777946	0.123837	0.0588836	0.157054
NER	0.0931148	0.089957	0.0192693	0.0704909	0.122333	0.0525911	0.150381
ETH	0.114318	0.114004	0.0244423	0.0826314	0.148464	0.065942	0.190622
GRL	0.150197	0.145625	0.0362051	0.107494	0.196516	0.0900408	0.26312
OMN	0.0935923	0.0903143	0.0203882	0.0702304	0.118883	0.0516882	0.153957
ESP	0.103522	0.102488	0.0214035	0.0779287	0.132397	0.0629985	0.17014
TJK	0.110088	0.106416	0.0259225	0.0808017	0.144115	0.0674435	0.215821
YEM	0.122962	0.11926	0.0234216	0.0961007	0.154518	0.0770257	0.189516
THA	0.0939849	0.09216	0.0211577	0.0714769	0.118703	0.0515511	0.170818
UZB	0.103548	0.0987746	0.0259994	0.0729704	0.140806	0.0559451	0.166186
DZA	0.0888115	0.0863644	0.0207729	0.0645819	0.123815	0.0514331	0.161677
FRA	0.0997307	0.0966027	0.0218088	0.0750337	0.123301	0.0605687	0.16794
CRI	0.104501	0.101545	0.0230908	0.0775184	0.135926	0.0604169	0.168598
AUT	0.0917454	0.0884897	0.0219985	0.067392	0.116968	0.0491471	0.171943
GHA	0.120897	0.118235	0.0271697	0.0866281	0.158996	0.0718974	0.189466
MEX	0.0874075	0.0840993	0.0171189	0.0660445	0.108743	0.0586279	0.136186
HTI	0.110278	0.105553	0.0204688	0.0876851	0.139411	0.0751867	0.164835
JPN	0.160724	0.161074	0.0409624	0.112294	0.203374	0.081588	0.330496
NPL	0.101657	0.0999912	0.0208183	0.0769541	0.128077	0.0583966	0.164493
BGR	0.109258	0.106849	0.0243046	0.0841989	0.144896	0.0558527	0.169941
DNK	0.0873578	0.0832483	0.0190246	0.0669936	0.115407	0.0405045	0.142447
MMR	0.117664	0.117181	0.0240319	0.0884038	0.153328	0.065311	0.183701
SWZ	0.091378	0.0889273	0.0196235	0.0694139	0.113368	0.0470508	0.165649
CYP	0.114036	0.108865	0.0261476	0.0853314	0.14675	0.0621653	0.19982
ROU	0.115516	0.112141	0.0231357	0.0879287	0.144807	0.0726563	0.176884
DOM	0.10071	0.0981541	0.0222398	0.0780275	0.128294	0.0634587	0.16494
BRA	0.0973963	0.0923661	0.0244789	0.0725618	0.129363	0.0626622	0.186676
ITA	0.110389	0.105682	0.0241703	0.0852344	0.147204	0.0543442	0.170205
SYR	0.119349	0.114769	0.0205439	0.0972334	0.148055	0.0833377	0.17423
CHL	0.0766935	0.0736968	0.0173207	0.0570646	0.0959635	0.0474697	0.148432
BEL	0.0971622	0.0951168	0.017778	0.0757518	0.117442	0.059634	0.16378
EST	0.0979358	0.0945252	0.0257711	0.0720791	0.128791	0.0571896	0.205918
LBN	0.144342	0.139831	0.0316245	0.110809	0.188638	0.0796524	0.25034
GIN	0.112753	0.110905	0.0239687	0.0834614	0.143993	0.0688851	0.174964
BRN	0.0972705	0.0944106	0.0244888	0.072176	0.128037	0.0556399	0.201245
MNG	0.0956016	0.0892684	0.0222428	0.0717133	0.126389	0.0538554	0.178004
PRY	0.0874356	0.084168	0.0204972	0.0645114	0.115386	0.0576608	0.150897
USA	0.0917609	0.0857849	0.0211391	0.0691228	0.122927	0.0573938	0.177073
RWA	0.106399	0.102562	0.0228656	0.0805941	0.140043	0.0688566	0.16276
PRK	0.111861	0.10981	0.024087	0.0818069	0.1438	0.0620127	0.176465
NGA	0.0995895	0.100797	0.0209015	0.0756781	0.124161	0.0539164	0.179836
BWA	0.0774316	0.0742917	0.0155692	0.0584286	0.0976365	0.0397421	0.119644
NOR	0.119723	0.114689	0.0299077	0.090021	0.15588	0.0694949	0.230299
BIH	0.141116	0.13641	0.0331887	0.102269	0.185979	0.0693975	0.252577
BOL	0.12441	0.119824	0.0270994	0.0945999	0.15964	0.0754161	0.22089
AZE	0.109455	0.105432	0.0237559	0.0826658	0.13767	0.0605967	0.202771
BLR	0.152434	0.148537	0.0312317	0.115521	0.190697	0.0869518	0.262055
KOR	0.0974468	0.0941288	0.0217238	0.0702192	0.126309	0.0616656	0.159717
RUS	0.110873	0.109569	0.0223976	0.0847082	0.136138	0.0705491	0.183748
PER	0.0971826	0.0933194	0.0221193	0.0711496	0.127746	0.0550996	0.165294
VNM	0.0972925	0.095509	0.0233502	0.0684271	0.127736	0.0544736	0.163397
PSE	0.126317	0.123318	0.0242804	0.0929195	0.1603	0.0740632	0.183774
TUN	0.103015	0.100823	0.0212981	0.0772016	0.127786	0.0679448	0.172743
NLD	0.0935766	0.0917718	0.0200822	0.0699645	0.118514	0.0554968	0.173284
GTM	0.111608	0.108456	0.0277902	0.0826436	0.144339	0.0686749	0.243579
URY	0.0771519	0.0743666	0.0167708	0.0570762	0.099346	0.0467583	0.123882
HRV	0.110763	0.107607	0.0263242	0.0798401	0.150786	0.0617291	0.181152
IDN	0.0955701	0.0953414	0.0206754	0.0709825	0.125448	0.059696	0.159809
LAO	0.112674	0.113176	0.023356	0.0878808	0.136805	0.0651595	0.212572
GUY	0.101251	0.0978445	0.0220533	0.0757047	0.128341	0.0549544	0.168539
SLB	0.108011	0.10471	0.0279129	0.0798321	0.137138	0.0614732	0.251248
ISL	0.157984	0.153465	0.0339514	0.11955	0.206453	0.096829	0.247446
MOZ	0.106503	0.103083	0.0225908	0.081182	0.136833	0.0693848	0.180958
MLI	0.0934426	0.0926155	0.0181745	0.0718099	0.117906	0.0558252	0.15809
PHL	0.0918288	0.087929	0.020794	0.0682327	0.117166	0.0551232	0.159709
CAN	0.0870544	0.0849044	0.0172692	0.0671098	0.116173	0.057579	0.13346
CMR	0.109851	0.106843	0.0256503	0.0819767	0.144842	0.0662124	0.209404
FJI	0.0966332	0.0956626	0.0204174	0.0724633	0.124295	0.0617211	0.158561
CIV	0.103133	0.100492	0.0213661	0.0802792	0.124351	0.0597513	0.185536
TUR	0.133313	0.128092	0.0297533	0.0998435	0.173849	0.0797815	0.225457
LBR	0.116026	0.114836	0.0222171	0.0881209	0.142918	0.0779998	0.184862
BEN	0.0956038	0.0930716	0.0223764	0.0681414	0.126938	0.051	0.170909

## Sheet: Stats_ATR_CCS
	mean	median	std	p10	p90	min	max
CHE	0.10212	0.100222	0.0209414	0.0789317	0.131895	0.063754	0.164872
SLV	0.0744808	0.0727543	0.0138734	0.058911	0.0926828	0.0456961	0.115377
ARG	0.0848692	0.0849528	0.0149554	0.065719	0.104334	0.0570897	0.138307
PAN	0.0670658	0.0652309	0.012532	0.0533058	0.0832367	0.0438258	0.100445
UKR	0.0883644	0.0851914	0.0156788	0.0714609	0.109862	0.0545237	0.152967
GEO	0.0578712	0.0558381	0.0114298	0.0458076	0.0718373	0.0380162	0.101001
CUB	0.0868841	0.084253	0.0168437	0.0660979	0.111396	0.0576544	0.129029
ECU	0.0854775	0.082134	0.0151464	0.0666946	0.107395	0.0525365	0.129114
DEU	0.100627	0.10098	0.017378	0.0805704	0.124356	0.0667007	0.144063
BFA	0.069332	0.0673049	0.0137366	0.0517147	0.0883212	0.0432484	0.10054
MDG	0.0619013	0.0612107	0.0118643	0.0487135	0.0767481	0.035539	0.0980705
KGZ	0.0640545	0.0627492	0.0125539	0.0489735	0.0788402	0.0397981	0.100747
IRQ	0.0739721	0.0725813	0.0122759	0.059087	0.089407	0.0512206	0.121976
SOM	0.0815185	0.0790121	0.0157339	0.0634599	0.105226	0.0523424	0.121069
NAM	0.0691274	0.0668945	0.0139655	0.0532842	0.0854044	0.0420774	0.125246
ARE	0.0692624	0.0661233	0.0157881	0.0507724	0.0900271	0.0398377	0.115858
HUN	0.0882772	0.0871673	0.0191783	0.067765	0.113079	0.0523783	0.159989
SEN	0.0634592	0.0627683	0.0127278	0.0475428	0.0806624	0.0361256	0.110051
LBY	0.0592912	0.056312	0.0124484	0.0467427	0.0766059	0.037903	0.100933
SDN	0.0878132	0.0875382	0.0173736	0.0647963	0.107953	0.0556143	0.137892
MYS	0.0685772	0.0670714	0.0131284	0.0529782	0.0888278	0.0469012	0.101247
SUR	0.0697681	0.0685774	0.0119526	0.0541172	0.0863614	0.0475961	0.0969536
BLZ	0.0782799	0.0773361	0.012711	0.0629162	0.0912787	0.0478389	0.129845
SVN	0.097373	0.0948488	0.0198264	0.0770506	0.126042	0.0532462	0.157925
CZE	0.0864254	0.083068	0.0204541	0.0613914	0.116101	0.053096	0.147271
IRN	0.0706218	0.0694084	0.013521	0.0550626	0.0891045	0.0448101	0.111932
SLE	0.0712853	0.0706001	0.014403	0.0532586	0.0891692	0.0420469	0.12673
JOR	0.067256	0.0655589	0.0127	0.0522812	0.0839209	0.0459323	0.112527
LTU	0.0925781	0.0912879	0.0180818	0.0711962	0.114997	0.0615988	0.150966
SWE	0.0785612	0.0781791	0.0154911	0.0601959	0.0993939	0.0491062	0.119481
POL	0.0940029	0.0939152	0.017957	0.072335	0.116564	0.0587335	0.143749
TZA	0.0612641	0.0593643	0.0116787	0.0484679	0.0772579	0.0426084	0.0996352
VEN	0.104004	0.10354	0.0178994	0.0808992	0.126733	0.0567491	0.164027
KEN	0.0707626	0.0684428	0.0146616	0.0544863	0.0874775	0.0420866	0.131827
SVK	0.0847569	0.0822261	0.0146596	0.0685477	0.1007	0.0580235	0.142864
GBR	0.0858004	0.0840292	0.0162391	0.067525	0.104373	0.045121	0.142757
MAR	0.0634146	0.0598061	0.0132605	0.0495986	0.0812599	0.0402235	0.110764
AGO	0.0666371	0.0652614	0.0129618	0.0497281	0.0832853	0.0393964	0.107663
KWT	0.0549326	0.0529337	0.0128391	0.0408491	0.0725375	0.0362414	0.0959392
UGA	0.0660006	0.0642938	0.0122613	0.051237	0.0816799	0.0426018	0.103673
KHM	0.0612358	0.0591272	0.0119938	0.0485011	0.0773752	0.0385535	0.10915
COD	0.0680021	0.0669669	0.0130788	0.0535528	0.0847915	0.0379047	0.102358
QAT	0.0545043	0.053944	0.0104	0.042398	0.0686776	0.036347	0.0802581
BGD	0.0656068	0.0640299	0.0117489	0.0521521	0.0795563	0.0431408	0.107207
GRC	0.0944312	0.0924272	0.0167129	0.0768637	0.114115	0.0579639	0.15623
IND	0.058487	0.057108	0.0112886	0.0460077	0.0708558	0.0346222	0.104544
MDA	0.0759106	0.0748941	0.0144979	0.0582521	0.0951324	0.0446974	0.130073
GAB	0.0768936	0.0757244	0.0160017	0.0580952	0.0994851	0.0496208	0.115546
MWI	0.0717517	0.0694207	0.0141299	0.0556063	0.0911028	0.0436014	0.118341
EGY	0.0772797	0.0746062	0.0145131	0.05967	0.0956487	0.0512816	0.121835
MNE	0.076971	0.0762517	0.0117251	0.0626465	0.094151	0.0515178	0.111186
ZAF	0.0624828	0.0614543	0.0100162	0.0513082	0.0750373	0.0423008	0.0914676
MKD	0.0710697	0.07034	0.0139974	0.0554548	0.0899613	0.0487429	0.122497
BHS	0.0716202	0.069318	0.0145409	0.0551801	0.0890585	0.0483945	0.121035
ZWE	0.071255	0.071108	0.0121471	0.0567363	0.0852268	0.0421375	0.114778
IRL	0.0983008	0.0952018	0.0175438	0.0785785	0.122442	0.060679	0.150202
LKA	0.0772851	0.0760258	0.0156693	0.0568919	0.0976071	0.0494602	0.144049
SRB	0.0756029	0.0736843	0.0147812	0.0590572	0.0934133	0.0483318	0.14607
COG	0.0770378	0.0752362	0.0137086	0.0634585	0.0950914	0.048924	0.127057
NZL	0.0828258	0.0816	0.0147641	0.0651785	0.101199	0.0564743	0.14302
LVA	0.0867867	0.0861675	0.0179562	0.0623743	0.113848	0.0537932	0.13391
AUS	0.0825263	0.0811425	0.0147651	0.0658284	0.0980473	0.0543996	0.140565
FLK	0.0725417	0.0704096	0.0132309	0.0583792	0.089901	0.0462197	0.108148
ISR	0.0713847	0.0704244	0.0126822	0.0553862	0.085419	0.0506234	0.111316
COL	0.0648	0.0642821	0.0123626	0.0500992	0.0808204	0.0425819	0.114324
FIN	0.0978568	0.0947714	0.0193589	0.0762272	0.12452	0.0656302	0.16326
GMB	0.0603898	0.0577605	0.0122355	0.0464632	0.0769323	0.0373034	0.0984018
PRT	0.0897584	0.0868372	0.0186503	0.070746	0.111357	0.0557513	0.17265
SAU	0.0793292	0.0775103	0.0145715	0.0613182	0.096584	0.0489629	0.120324
PNG	0.063859	0.0642288	0.0121334	0.0485755	0.08004	0.0353946	0.0983064
JAM	0.0679801	0.0658204	0.0131046	0.0529275	0.0843132	0.0449804	0.120645
PAK	0.0746179	0.0732567	0.0134382	0.0584537	0.0893315	0.0483816	0.120366
ZMB	0.0714185	0.0683657	0.0144202	0.0554929	0.0883873	0.0450016	0.128802
CHN	0.0745133	0.0721014	0.0182368	0.0538913	0.0987653	0.0387488	0.124829
KAZ	0.0619964	0.0598331	0.0119108	0.0466658	0.077825	0.0345498	0.08888
ARM	0.0648208	0.06303	0.0114077	0.0518194	0.0796434	0.0395772	0.0984099
LUX	0.106813	0.103308	0.0210149	0.084375	0.1343	0.0653385	0.172426
ALB	0.0689276	0.0659264	0.0130453	0.0540378	0.0854715	0.0455951	0.118409
HND	0.0710071	0.0702094	0.0122048	0.0562898	0.0868445	0.0435781	0.11833
NIC	0.0722619	0.0684004	0.0173921	0.0572396	0.0906798	0.0511602	0.165037
NER	0.0721893	0.0713265	0.0145418	0.0560939	0.090603	0.0438577	0.119028
ETH	0.0814687	0.0793234	0.0147696	0.064024	0.100362	0.0597437	0.129247
GRL	0.0695838	0.0697697	0.0121025	0.054657	0.0860055	0.0489018	0.100605
OMN	0.0770814	0.0753417	0.01427	0.0617044	0.0971906	0.0510454	0.13368
ESP	0.0971635	0.0940063	0.0203166	0.0765333	0.116422	0.0606885	0.215579
TJK	0.065716	0.0653028	0.0127357	0.051214	0.0822214	0.0403204	0.104902
YEM	0.0883615	0.0854177	0.0168012	0.067365	0.110507	0.0542252	0.136313
THA	0.0633564	0.0608821	0.0127904	0.0494573	0.0789571	0.0427071	0.103017
UZB	0.0596174	0.0582834	0.0104234	0.0473458	0.0730131	0.0417076	0.0898795
DZA	0.0613082	0.0601597	0.0104975	0.047984	0.0758129	0.0381813	0.088482
FRA	0.0970673	0.0936999	0.0213797	0.0746382	0.123359	0.0622066	0.183889
CRI	0.0712418	0.0701964	0.0132787	0.0562574	0.0869073	0.0494037	0.117316
AUT	0.0764108	0.0725059	0.0192844	0.0562807	0.103021	0.0393347	0.159689
GHA	0.0723418	0.0707044	0.0141642	0.0562816	0.0930626	0.0442726	0.111008
MEX	0.0613975	0.059258	0.0127425	0.0486202	0.0766275	0.0379681	0.113566
HTI	0.0787055	0.0781762	0.0157401	0.0595289	0.0956805	0.0464815	0.132293
JPN	0.0995308	0.096531	0.0218397	0.076512	0.121947	0.0650777	0.178009
NPL	0.06353	0.0627328	0.012453	0.0469539	0.0770914	0.0386347	0.104342
BGR	0.0853902	0.0821167	0.0176612	0.0665563	0.11023	0.0486651	0.151058
DNK	0.100928	0.0961912	0.0233026	0.0760364	0.1328	0.0545997	0.175435
MMR	0.0762368	0.0742499	0.0151214	0.0587708	0.094947	0.0439774	0.119632
SWZ	0.06349	0.0637679	0.0126603	0.0477698	0.0801131	0.0392605	0.0992159
CYP	0.0946698	0.0910314	0.02048	0.0729415	0.120156	0.0572052	0.174052
ROU	0.094159	0.0933091	0.0165117	0.0739302	0.112616	0.055695	0.154504
DOM	0.0690079	0.0694753	0.0119601	0.0555412	0.0844629	0.0395491	0.104488
BRA	0.0623315	0.0612311	0.0129062	0.0479029	0.0788819	0.0383722	0.0988153
ITA	0.08838	0.0877418	0.0171495	0.0696365	0.112409	0.0505855	0.145689
SYR	0.0893545	0.0856835	0.01784	0.0696824	0.111026	0.0618149	0.143846
CHL	0.0633121	0.061859	0.0128144	0.047193	0.0770137	0.0399423	0.124291
BEL	0.101837	0.0991428	0.0204894	0.0791761	0.125618	0.0685954	0.192052
EST	0.0849394	0.0826757	0.0180532	0.0619655	0.109333	0.0528059	0.137921
LBN	0.0953935	0.0942625	0.0175626	0.0737957	0.117233	0.0624599	0.151568
GIN	0.0721107	0.0698158	0.0144762	0.0556464	0.0915313	0.0484787	0.122711
BRN	0.0628723	0.062483	0.0129261	0.0465117	0.0802788	0.0376311	0.101616
MNG	0.0682855	0.0670957	0.0136101	0.0528944	0.0864763	0.0447041	0.113511
PRY	0.0678784	0.0648243	0.0141125	0.0516267	0.0845956	0.0401561	0.10749
USA	0.0621321	0.0615658	0.0110031	0.0485243	0.0759318	0.0351603	0.096881
RWA	0.0627924	0.0618278	0.0130865	0.0473467	0.0756641	0.0413136	0.105746
PRK	0.088482	0.0875495	0.0169117	0.0686493	0.112128	0.0544519	0.128491
NGA	0.0681309	0.0665737	0.0140109	0.0505938	0.0880263	0.0408472	0.116069
BWA	0.0574748	0.0556772	0.0120356	0.0438509	0.0737526	0.0339873	0.0925304
NOR	0.096333	0.0929195	0.0172204	0.07596	0.119302	0.0653545	0.150509
BIH	0.0791931	0.0780897	0.0132186	0.0626227	0.0951391	0.0525365	0.133279
BOL	0.0869057	0.0853301	0.016134	0.0695104	0.106383	0.0521056	0.137809
AZE	0.0671986	0.0659657	0.0110961	0.0525153	0.0820721	0.044909	0.0988722
BLR	0.098517	0.0963012	0.0190664	0.0778973	0.11925	0.0600601	0.156042
KOR	0.079831	0.0783564	0.0150485	0.0607392	0.098201	0.0544075	0.140235
RUS	0.0444473	0.0428328	0.00783166	0.0356246	0.0556078	0.0319024	0.0740739
PER	0.0607688	0.0604463	0.0107142	0.0479559	0.0748907	0.0336556	0.0848521
VNM	0.0650092	0.0635283	0.0126198	0.0514643	0.0823827	0.0455775	0.110334
PSE	0.0978396	0.096032	0.0207244	0.0743741	0.13042	0.0582749	0.160188
TUN	0.0760778	0.0748087	0.0140387	0.0590177	0.0943987	0.0456474	0.118145
NLD	0.102508	0.0996039	0.021477	0.0783199	0.128037	0.0633696	0.164896
GTM	0.0684931	0.0668363	0.0119173	0.0543054	0.085689	0.0426995	0.100755
URY	0.0610134	0.0602422	0.0118309	0.0454287	0.0773587	0.0379179	0.0957008
HRV	0.0890593	0.0867895	0.017369	0.0681052	0.110663	0.0562875	0.147901
IDN	0.0656064	0.0645072	0.0114456	0.0524301	0.0782902	0.0419584	0.10501
LAO	0.0740445	0.0718194	0.0128394	0.0573577	0.0911467	0.0527037	0.114543
GUY	0.0614301	0.060318	0.0116109	0.0497643	0.071303	0.0422554	0.114531
SLB	0.0692444	0.0681619	0.0124259	0.0548819	0.0862054	0.0378275	0.110074
ISL	0.0894683	0.0869864	0.0163243	0.070227	0.114022	0.05808	0.144029
MOZ	0.0762594	0.0750634	0.0162272	0.0576778	0.100489	0.0462037	0.129818
MLI	0.0712017	0.0662859	0.0156688	0.0547912	0.0917868	0.0449373	0.121156
PHL	0.0593755	0.0568651	0.0137252	0.0442138	0.08019	0.034891	0.102143
CAN	0.0785691	0.0773061	0.015008	0.0633303	0.0951534	0.0539361	0.164414
CMR	0.0693759	0.0679855	0.0128253	0.0535967	0.0841353	0.038879	0.116466
FJI	0.0734392	0.0725705	0.01221	0.0594113	0.0897776	0.0449754	0.131546
CIV	0.0625126	0.0614426	0.0114733	0.0487193	0.0762679	0.0424896	0.0957496
TUR	0.0833647	0.0824924	0.0131623	0.0688749	0.100091	0.0547787	0.11726
LBR	0.0709531	0.0687173	0.0138399	0.0539372	0.0886048	0.0446002	0.126115
BEN	0.0631985	0.060512	0.0121887	0.0495532	0.0788757	0.0381767	0.100444

## Sheet: Stats_B_PYR_kerosene
	mean	median	std	p10	p90	min	max
CHE	0.245091	0.2403	0.035474	0.204128	0.297365	0.175284	0.371114
SLV	0.204717	0.203321	0.0287101	0.170841	0.237471	0.152698	0.322373
ARG	0.211691	0.209956	0.0302616	0.171878	0.250562	0.142858	0.287872
PAN	0.17477	0.17372	0.021933	0.145787	0.204347	0.119835	0.229368
UKR	0.253775	0.249297	0.0353252	0.212763	0.299286	0.182085	0.334825
GEO	0.165949	0.162635	0.0281401	0.134891	0.200203	0.110957	0.269574
CUB	0.237795	0.230773	0.0336964	0.199902	0.28718	0.176149	0.347909
ECU	0.220202	0.216225	0.0391307	0.176081	0.277817	0.137439	0.352527
DEU	0.216826	0.214118	0.0263761	0.186516	0.252741	0.1649	0.300636
BFA	0.17347	0.168279	0.029698	0.144227	0.204943	0.115564	0.283756
MDG	0.156095	0.155362	0.0260462	0.121937	0.186047	0.111566	0.243116
KGZ	0.190976	0.187298	0.0280014	0.15384	0.229169	0.140275	0.270959
IRQ	0.203134	0.201599	0.028005	0.169113	0.239474	0.143937	0.286664
SOM	0.190724	0.188226	0.0253388	0.157505	0.223065	0.139212	0.266371
NAM	0.160093	0.161915	0.0228912	0.131169	0.187522	0.111337	0.228146
ARE	0.161566	0.159986	0.0224567	0.135428	0.186132	0.111167	0.231449
HUN	0.187366	0.182781	0.0244398	0.160447	0.223237	0.126758	0.248722
SEN	0.136656	0.135698	0.0220174	0.111518	0.163086	0.0920507	0.197068
LBY	0.138405	0.132828	0.0242858	0.110769	0.168695	0.104982	0.229431
SDN	0.22771	0.22725	0.0352882	0.186041	0.267208	0.127852	0.384934
MYS	0.146836	0.144746	0.0204892	0.122804	0.171222	0.106689	0.223515
SUR	0.184429	0.181029	0.0256231	0.150512	0.221754	0.136557	0.2413
BLZ	0.215874	0.214363	0.0350269	0.173636	0.267248	0.14785	0.321158
SVN	0.221062	0.215579	0.0263616	0.189315	0.252168	0.176862	0.293588
CZE	0.16891	0.169077	0.0206005	0.140112	0.195678	0.124348	0.232367
IRN	0.19088	0.187646	0.0262606	0.159316	0.224493	0.145379	0.28855
SLE	0.185846	0.184337	0.0335168	0.146706	0.227257	0.12537	0.300581
JOR	0.173584	0.170653	0.0228184	0.146609	0.206433	0.126533	0.227305
LTU	0.186648	0.184753	0.0236182	0.159942	0.214546	0.142528	0.277559
SWE	0.167543	0.164619	0.0218325	0.142879	0.197222	0.126191	0.241523
POL	0.198362	0.196127	0.0280319	0.168654	0.230057	0.146955	0.320498
TZA	0.158314	0.15582	0.0271222	0.12823	0.187667	0.101263	0.234964
VEN	0.275432	0.275047	0.0397915	0.225355	0.326406	0.183245	0.38972
KEN	0.207872	0.203797	0.0276765	0.178398	0.241823	0.136471	0.291358
SVK	0.198214	0.19458	0.0295067	0.163248	0.237146	0.145102	0.293024
GBR	0.231631	0.230512	0.0292251	0.195983	0.272392	0.174512	0.313545
MAR	0.15084	0.150566	0.0228855	0.120802	0.182374	0.101967	0.209207
AGO	0.172427	0.168329	0.0291196	0.142669	0.204658	0.116274	0.307169
KWT	0.143738	0.140022	0.0180964	0.12489	0.17102	0.110214	0.197642
UGA	0.160206	0.156863	0.0267591	0.131183	0.196728	0.110234	0.247926
KHM	0.173509	0.171205	0.0253331	0.143174	0.207501	0.118513	0.259825
COD	0.188436	0.186618	0.0282563	0.157333	0.22789	0.115608	0.266326
QAT	0.140191	0.13935	0.0158596	0.121756	0.163053	0.109585	0.187502
BGD	0.183116	0.177871	0.0306976	0.150639	0.212076	0.12405	0.336314
GRC	0.212526	0.211578	0.0259748	0.181968	0.2445	0.167308	0.310098
IND	0.158203	0.154718	0.0267154	0.128252	0.18968	0.113563	0.261892
MDA	0.214358	0.210536	0.0279272	0.181354	0.247436	0.168663	0.318211
GAB	0.200073	0.199555	0.028992	0.165606	0.233486	0.145265	0.296755
MWI	0.178173	0.17245	0.029747	0.145186	0.215466	0.120433	0.289026
EGY	0.178043	0.171559	0.0323351	0.144091	0.220278	0.125879	0.313673
MNE	0.213071	0.20744	0.0309995	0.178644	0.258572	0.15319	0.293984
ZAF	0.150643	0.148883	0.0180363	0.129471	0.173143	0.111578	0.195886
MKD	0.195443	0.194337	0.0252556	0.164809	0.224115	0.148823	0.292032
BHS	0.182924	0.180731	0.0230512	0.156024	0.21173	0.136773	0.25024
ZWE	0.183077	0.182949	0.0284645	0.14918	0.221533	0.109549	0.263087
IRL	0.219682	0.216796	0.0272387	0.189314	0.257906	0.166071	0.319317
LKA	0.219669	0.222463	0.0301614	0.180247	0.256997	0.146866	0.321626
SRB	0.198209	0.193118	0.0297878	0.165215	0.237809	0.139143	0.285781
COG	0.198045	0.198371	0.0301241	0.163467	0.23137	0.122913	0.290407
NZL	0.194975	0.191175	0.0219935	0.170897	0.22474	0.126265	0.247257
LVA	0.191152	0.189073	0.0224963	0.165953	0.223003	0.142222	0.272037
AUS	0.191821	0.184808	0.0254193	0.167266	0.22383	0.14907	0.291718
FLK	0.20985	0.203253	0.0328757	0.167569	0.255157	0.13702	0.296065
ISR	0.179749	0.176675	0.0225667	0.155458	0.210097	0.120535	0.240836
COL	0.151843	0.147741	0.0247513	0.123792	0.186155	0.107169	0.222954
FIN	0.233959	0.231939	0.0282803	0.202595	0.271906	0.151757	0.301967
GMB	0.14426	0.142885	0.0200436	0.119497	0.168825	0.0989631	0.20976
PRT	0.203832	0.203409	0.0260424	0.172718	0.240843	0.1476	0.267766
SAU	0.184134	0.180175	0.0224903	0.159696	0.210598	0.140938	0.266629
PNG	0.182071	0.177365	0.0256848	0.154127	0.218582	0.131856	0.25962
JAM	0.183316	0.180633	0.0293867	0.147923	0.215569	0.135808	0.282656
PAK	0.209023	0.204385	0.0315031	0.176736	0.259833	0.133668	0.308149
ZMB	0.184335	0.184221	0.0299312	0.146784	0.222931	0.124007	0.290513
CHN	0.128919	0.128882	0.0189	0.105544	0.15233	0.0920061	0.185929
KAZ	0.166954	0.164032	0.0254133	0.140023	0.198797	0.10518	0.248873
ARM	0.179052	0.18006	0.0243753	0.146369	0.211654	0.124398	0.247459
LUX	0.22312	0.220132	0.0268059	0.192776	0.258588	0.169188	0.304432
ALB	0.201098	0.198822	0.0346486	0.160801	0.252907	0.139316	0.296316
HND	0.193148	0.190597	0.0244623	0.16214	0.22625	0.134921	0.26122
NIC	0.162472	0.16102	0.0282293	0.125454	0.200105	0.109541	0.238445
NER	0.183351	0.184569	0.027342	0.143764	0.217594	0.129377	0.261687
ETH	0.202987	0.197721	0.0307483	0.169095	0.254473	0.144724	0.288992
GRL	0.199265	0.192673	0.0302674	0.166735	0.243416	0.136747	0.27835
OMN	0.190131	0.191116	0.0261198	0.155735	0.221408	0.138225	0.260666
ESP	0.224366	0.222759	0.0265203	0.190615	0.260826	0.176233	0.317753
TJK	0.191201	0.187415	0.0261594	0.159965	0.224088	0.134391	0.260598
YEM	0.238869	0.235776	0.0345756	0.202591	0.287268	0.155121	0.349627
THA	0.136217	0.134165	0.0208983	0.11117	0.163184	0.101311	0.203559
UZB	0.172811	0.170175	0.0268461	0.142599	0.209387	0.128425	0.262741
DZA	0.150877	0.149969	0.0238961	0.118214	0.183334	0.0969861	0.212612
FRA	0.228761	0.229953	0.0296328	0.189627	0.264349	0.168543	0.308985
CRI	0.186778	0.18296	0.0261737	0.153037	0.222658	0.138209	0.254665
AUT	0.18656	0.181356	0.0285605	0.154621	0.222102	0.144357	0.323307
GHA	0.197607	0.194693	0.0283042	0.163443	0.233419	0.138577	0.279897
MEX	0.140588	0.133126	0.0250409	0.118927	0.169072	0.0920645	0.271885
HTI	0.216116	0.209882	0.0326705	0.173895	0.254684	0.151221	0.32614
JPN	0.28596	0.279768	0.036504	0.244173	0.33498	0.225742	0.416003
NPL	0.172855	0.170047	0.0237476	0.147562	0.202069	0.109805	0.246955
BGR	0.198325	0.197012	0.023828	0.169812	0.233337	0.146824	0.27725
DNK	0.222223	0.217735	0.0287828	0.191586	0.256976	0.170693	0.339954
MMR	0.209796	0.210214	0.0301012	0.176117	0.249522	0.13954	0.281576
SWZ	0.152813	0.147648	0.0232388	0.125525	0.183417	0.104744	0.227726
CYP	0.213153	0.2072	0.0254465	0.184895	0.249212	0.163272	0.288457
ROU	0.216869	0.214391	0.0258015	0.185933	0.257931	0.15477	0.279083
DOM	0.178126	0.176186	0.0237293	0.149797	0.208484	0.129111	0.253315
BRA	0.148717	0.144982	0.0241599	0.127043	0.181798	0.101646	0.23633
ITA	0.193018	0.191429	0.0257342	0.165281	0.221483	0.130506	0.271446
SYR	0.24204	0.245888	0.0334627	0.195643	0.281342	0.172059	0.336521
CHL	0.138419	0.136434	0.0201289	0.113299	0.164681	0.0995137	0.201819
BEL	0.217872	0.213387	0.030984	0.183421	0.254414	0.149009	0.337049
EST	0.186888	0.185044	0.0247778	0.160355	0.221845	0.135971	0.266084
LBN	0.271034	0.260932	0.0440378	0.21735	0.340365	0.199946	0.393013
GIN	0.182268	0.180805	0.0279598	0.145307	0.218668	0.130838	0.281916
BRN	0.163226	0.162801	0.022645	0.137667	0.188288	0.116068	0.26063
MNG	0.17905	0.176382	0.0248683	0.150931	0.215998	0.119791	0.245762
PRY	0.149166	0.147692	0.01975	0.122377	0.17463	0.107136	0.201657
USA	0.179865	0.178627	0.0226216	0.153732	0.209714	0.138353	0.264404
RWA	0.162756	0.161007	0.0254838	0.132	0.196097	0.11455	0.23252
PRK	0.234407	0.232353	0.0341779	0.1881	0.276682	0.165892	0.353618
NGA	0.173583	0.17128	0.0237676	0.146855	0.207114	0.131291	0.237478
BWA	0.129572	0.129605	0.0183815	0.107138	0.152325	0.0889366	0.192061
NOR	0.231489	0.227128	0.0328083	0.194617	0.277411	0.170471	0.363321
BIH	0.223769	0.224948	0.0313163	0.179355	0.256599	0.161305	0.329146
BOL	0.214518	0.208705	0.030845	0.176361	0.24912	0.151051	0.327779
AZE	0.182968	0.181683	0.023151	0.152935	0.209575	0.129005	0.251522
BLR	0.28972	0.28212	0.0458358	0.237303	0.354518	0.179108	0.41602
KOR	0.188571	0.185742	0.0249823	0.158626	0.220724	0.14025	0.25469
RUS	0.177516	0.174645	0.0276297	0.147581	0.203655	0.126828	0.331825
PER	0.148777	0.147621	0.0222202	0.121448	0.178387	0.103863	0.214576
VNM	0.165547	0.165225	0.022247	0.138815	0.193759	0.116577	0.217582
PSE	0.276009	0.269947	0.0411414	0.227671	0.330631	0.17679	0.395004
TUN	0.194068	0.191919	0.0308014	0.153076	0.236732	0.138098	0.289846
NLD	0.210206	0.208474	0.0291993	0.175519	0.248416	0.146661	0.304125
GTM	0.183287	0.185315	0.0241608	0.154768	0.212878	0.139154	0.25694
URY	0.137872	0.134228	0.0209945	0.113399	0.159281	0.0973872	0.221273
HRV	0.201253	0.195776	0.0252382	0.17243	0.238989	0.153639	0.269323
IDN	0.162749	0.15938	0.0235416	0.13435	0.192955	0.123457	0.240245
LAO	0.209969	0.207328	0.0298476	0.171898	0.249906	0.137404	0.281623
GUY	0.151666	0.152826	0.0224481	0.126319	0.1768	0.101616	0.256354
SLB	0.18879	0.187287	0.0280265	0.154042	0.224699	0.12719	0.256202
ISL	0.250112	0.244394	0.0355443	0.207794	0.294609	0.178172	0.363486
MOZ	0.178853	0.177239	0.024982	0.149852	0.212538	0.126215	0.262024
MLI	0.174389	0.173171	0.0282455	0.142183	0.208381	0.113598	0.256337
PHL	0.151891	0.148308	0.0208909	0.127108	0.184636	0.103317	0.216109
CAN	0.198909	0.198861	0.0263788	0.167268	0.226099	0.138049	0.300474
CMR	0.187242	0.181374	0.0310271	0.1504	0.230823	0.133229	0.2744
FJI	0.191204	0.188755	0.026766	0.157876	0.227107	0.143516	0.263194
CIV	0.154902	0.15339	0.0217954	0.129165	0.18555	0.113633	0.226252
TUR	0.231694	0.23364	0.0297963	0.19117	0.267093	0.183612	0.336768
LBR	0.191681	0.186179	0.0290332	0.158727	0.23263	0.138882	0.301912
BEN	0.15587	0.152077	0.0250629	0.126701	0.193933	0.0969262	0.227587

## Sheet: Stats_CLR
	mean	median	std	p10	p90	min	max
CHE	0.092843	0.0915171	0.015501	0.0742972	0.111188	0.0604352	0.144369
SLV	0.0726771	0.0724096	0.0148991	0.0538169	0.0910747	0.0483015	0.119969
ARG	0.0821141	0.0806284	0.0167915	0.0615787	0.103417	0.0500041	0.140562
PAN	0.0639561	0.0622349	0.0118621	0.051411	0.0794948	0.0406348	0.104343
UKR	0.0843049	0.0812959	0.0160031	0.0660349	0.107379	0.0482524	0.128573
GEO	0.0577755	0.0554029	0.0126242	0.0457698	0.0701179	0.0326712	0.105625
CUB	0.0887374	0.0882415	0.0168615	0.0682783	0.112281	0.0540191	0.139196
ECU	0.0853195	0.0846468	0.0161703	0.0683058	0.106838	0.0519652	0.144534
DEU	0.100876	0.099659	0.0214314	0.0748071	0.130208	0.0550357	0.168302
BFA	0.0681501	0.065799	0.0135445	0.0529694	0.0871985	0.0473487	0.110318
MDG	0.0609574	0.0590502	0.0128256	0.0462406	0.0804599	0.0321191	0.10048
KGZ	0.0666626	0.0654877	0.0124009	0.0525765	0.0847721	0.0423721	0.0987944
IRQ	0.0741618	0.0716045	0.014309	0.0593243	0.0917924	0.0445775	0.119881
SOM	0.0781352	0.0758439	0.0160122	0.057836	0.100168	0.0528355	0.119756
NAM	0.0672359	0.0661355	0.0131544	0.0513274	0.0835433	0.0447727	0.107067
ARE	0.0656638	0.0632383	0.012798	0.0519709	0.0821671	0.0390912	0.103343
HUN	0.0896981	0.0854036	0.0178283	0.0696703	0.114163	0.0537398	0.137212
SEN	0.0608901	0.0591316	0.0131388	0.045701	0.0767946	0.0333994	0.12024
LBY	0.0580924	0.0555212	0.0139325	0.0429921	0.0778866	0.0343408	0.102136
SDN	0.0881595	0.0863852	0.017407	0.0666526	0.113119	0.048878	0.134925
MYS	0.0665882	0.0645676	0.0137477	0.0507799	0.0845335	0.0430751	0.114321
SUR	0.0685359	0.0660635	0.0144959	0.0503534	0.0859264	0.0443791	0.131062
BLZ	0.0787103	0.0787285	0.0145997	0.0597917	0.0981047	0.0511112	0.110243
SVN	0.0974817	0.093598	0.0201644	0.0743713	0.126914	0.055673	0.150274
CZE	0.085744	0.0810088	0.0214151	0.061819	0.116051	0.0508731	0.143023
IRN	0.0677984	0.06705	0.0125443	0.0545248	0.0822553	0.0406286	0.115877
SLE	0.069568	0.0682941	0.0132416	0.053934	0.0896799	0.0441536	0.106252
JOR	0.0658417	0.0625415	0.0129855	0.0522922	0.0846764	0.0461299	0.0997071
LTU	0.0854873	0.0832346	0.0182914	0.0638362	0.107642	0.0567489	0.147416
SWE	0.081975	0.0773362	0.0199393	0.0631884	0.101731	0.0484175	0.159257
POL	0.0910339	0.0846466	0.0218071	0.073744	0.111607	0.0521621	0.212945
TZA	0.062937	0.0615697	0.0109906	0.0513313	0.0764982	0.0403117	0.103191
VEN	0.101215	0.100388	0.019568	0.0780088	0.126737	0.0620363	0.160284
KEN	0.0703975	0.0678698	0.0151473	0.0515545	0.090365	0.0441743	0.11438
SVK	0.0870713	0.0835286	0.0213929	0.0642634	0.114942	0.0505384	0.162307
GBR	0.0798594	0.0790384	0.0158217	0.0612228	0.0992797	0.0533295	0.152097
MAR	0.0623823	0.0608217	0.01254	0.0485394	0.0803155	0.0389018	0.116491
AGO	0.0672827	0.0640739	0.0153792	0.0505111	0.0910688	0.0366014	0.107166
KWT	0.0550857	0.0531476	0.0128898	0.0393613	0.0746514	0.0351248	0.0958174
UGA	0.0652692	0.0635284	0.0140462	0.0511338	0.0791016	0.036509	0.117781
KHM	0.0610916	0.0590398	0.0134866	0.0437765	0.0798915	0.0343534	0.102497
COD	0.0680714	0.0655231	0.0156699	0.0527238	0.0879407	0.0395121	0.146382
QAT	0.0555539	0.0520586	0.0119595	0.0431361	0.0745262	0.0377627	0.0898345
BGD	0.06793	0.0682529	0.0124877	0.0519566	0.081442	0.0441628	0.105767
GRC	0.0943428	0.0925498	0.0197499	0.0696992	0.121109	0.0578717	0.157095
IND	0.0592925	0.0575539	0.0109157	0.0454182	0.0731611	0.0384944	0.0877634
MDA	0.073305	0.070455	0.0141893	0.0588337	0.0918254	0.0432499	0.132904
GAB	0.0768577	0.0734063	0.0165232	0.0574537	0.099642	0.0383638	0.125607
MWI	0.0713523	0.0699536	0.0137107	0.0552136	0.0874789	0.0471743	0.125006
EGY	0.0741143	0.073064	0.0132637	0.0565561	0.0924493	0.043675	0.110186
MNE	0.0744162	0.0709326	0.0164325	0.0549521	0.0980349	0.0491828	0.124007
ZAF	0.0648637	0.0639052	0.0144037	0.0483254	0.0867856	0.0374173	0.10746
MKD	0.0692306	0.0668802	0.0127171	0.0533305	0.0867209	0.047332	0.106041
BHS	0.0737745	0.0729226	0.0138817	0.056161	0.0910831	0.048638	0.110292
ZWE	0.074496	0.0731462	0.0129166	0.0583648	0.0927689	0.0474854	0.119824
IRL	0.0962686	0.0927064	0.019441	0.0744588	0.126565	0.0611114	0.156859
LKA	0.0766766	0.0735286	0.016763	0.0567093	0.0967098	0.0463119	0.132462
SRB	0.0709572	0.0688388	0.0133666	0.0554957	0.0897002	0.0461733	0.112019
COG	0.0765512	0.0762224	0.015192	0.0589748	0.0980785	0.0397091	0.128557
NZL	0.0754365	0.072761	0.0138525	0.0593765	0.0945302	0.0450128	0.120125
LVA	0.084902	0.0802988	0.0204747	0.0631748	0.115967	0.0535877	0.154021
AUS	0.0794177	0.0760979	0.0163622	0.0612591	0.102772	0.0463531	0.123191
FLK	0.0687419	0.0679447	0.0125422	0.0539182	0.082634	0.0470222	0.107761
ISR	0.070748	0.0681778	0.0144313	0.0545396	0.0875416	0.0495039	0.124804
COL	0.0620346	0.061757	0.0123156	0.0475951	0.0793298	0.0385988	0.103457
FIN	0.0962752	0.0928608	0.0191747	0.0751621	0.119417	0.0627006	0.180439
GMB	0.0585798	0.0573796	0.0137674	0.0441151	0.0753233	0.032517	0.126547
PRT	0.0890934	0.0861314	0.0194746	0.0639781	0.118005	0.0584431	0.146832
SAU	0.0734775	0.0716244	0.0136975	0.0584317	0.0913938	0.0491579	0.116235
PNG	0.0661551	0.064509	0.0136144	0.050014	0.0849297	0.0389852	0.118
JAM	0.0659055	0.0621831	0.014288	0.0514744	0.0855024	0.0441881	0.117054
PAK	0.0745372	0.0732931	0.0141076	0.057156	0.0941934	0.0435319	0.114391
ZMB	0.0707968	0.069686	0.0160061	0.0510615	0.0903041	0.0408747	0.122094
CHN	0.075138	0.0731213	0.017268	0.0538658	0.0968955	0.0392656	0.130611
KAZ	0.0614275	0.0605415	0.0124844	0.0464381	0.0794728	0.0386896	0.0996604
ARM	0.0649539	0.0623314	0.0136031	0.0495185	0.0831335	0.0396324	0.109703
LUX	0.0999088	0.0995792	0.0194239	0.077069	0.128656	0.061241	0.146261
ALB	0.0667065	0.0649317	0.0128064	0.0508592	0.0851071	0.0353165	0.105353
HND	0.069629	0.0666398	0.0138037	0.0552279	0.0909656	0.0487445	0.117752
NIC	0.0701705	0.0643656	0.0193156	0.0529377	0.0952548	0.0418012	0.144813
NER	0.0734762	0.0719563	0.0148953	0.0552256	0.0942667	0.0458808	0.106235
ETH	0.0794007	0.0781206	0.0159893	0.059601	0.103493	0.0476969	0.12377
GRL	0.0652344	0.0648999	0.0125547	0.0512497	0.0811597	0.0380425	0.105324
OMN	0.0721238	0.0697812	0.0132099	0.0579468	0.088836	0.0411823	0.119999
ESP	0.0970239	0.0971351	0.0197888	0.0692404	0.123876	0.0539252	0.140178
TJK	0.0681032	0.0660659	0.0149193	0.0513925	0.0839785	0.0384933	0.126614
YEM	0.0848387	0.0822156	0.016024	0.0659814	0.107607	0.0572174	0.132875
THA	0.0625349	0.0629412	0.0130404	0.0468981	0.0790742	0.0356016	0.10336
UZB	0.061391	0.0621504	0.0109092	0.0476207	0.0743047	0.0392809	0.104514
DZA	0.0616175	0.0578518	0.0134027	0.0469579	0.0781647	0.0399828	0.124734
FRA	0.0978764	0.0945853	0.020067	0.0731505	0.124759	0.0606674	0.162884
CRI	0.0693088	0.0690784	0.012755	0.0542079	0.0830628	0.0495821	0.130148
AUT	0.0818639	0.0776207	0.0225024	0.0590432	0.110852	0.0435716	0.160291
GHA	0.072568	0.0715148	0.0155701	0.0542399	0.0950717	0.041037	0.116492
MEX	0.0634158	0.0608103	0.0152373	0.0479026	0.0837192	0.0367462	0.129434
HTI	0.0786588	0.0781341	0.0154669	0.0585409	0.0972301	0.0471852	0.133912
JPN	0.0938829	0.0906268	0.0192788	0.0729634	0.124985	0.0562612	0.15239
NPL	0.0638791	0.0646611	0.0129732	0.0463494	0.0818218	0.0406317	0.0983085
BGR	0.089584	0.0852969	0.0220534	0.0653993	0.120437	0.0473116	0.173208
DNK	0.0930993	0.0924858	0.0174323	0.0709722	0.113899	0.0527579	0.152203
MMR	0.0755859	0.0755322	0.014378	0.0578455	0.0944963	0.0463607	0.120616
SWZ	0.0634995	0.0626461	0.0144876	0.047503	0.0832752	0.0341715	0.122639
CYP	0.0961846	0.0925657	0.0229624	0.0717872	0.130435	0.0520449	0.18579
ROU	0.0978499	0.0947344	0.0209984	0.0738413	0.126022	0.0607689	0.164657
DOM	0.0668415	0.0669739	0.0121438	0.0522623	0.083789	0.0417396	0.10035
BRA	0.0624431	0.0617124	0.0136187	0.0466182	0.0784052	0.0381212	0.122522
ITA	0.0898256	0.0873543	0.02127	0.0647132	0.121711	0.0455274	0.152383
SYR	0.0890368	0.0864626	0.0184438	0.0697364	0.112556	0.0550011	0.15063
CHL	0.0607097	0.0595794	0.0114158	0.0479795	0.0763727	0.0385008	0.102699
BEL	0.102691	0.101532	0.0204855	0.0810613	0.129351	0.0634363	0.17943
EST	0.082788	0.0820581	0.0182774	0.060296	0.10597	0.0439772	0.140356
LBN	0.0954811	0.0909645	0.0191516	0.0725166	0.118818	0.0560571	0.15296
GIN	0.0728412	0.0698002	0.0136555	0.0558549	0.0910957	0.0385346	0.112591
BRN	0.0607148	0.059356	0.0130836	0.0469958	0.0757908	0.0349047	0.116429
MNG	0.0652394	0.0630085	0.0119973	0.052125	0.082833	0.042852	0.0999887
PRY	0.0640413	0.0622919	0.0130215	0.0486854	0.0846174	0.0362726	0.100062
USA	0.0576699	0.0568043	0.00965917	0.0466581	0.0686487	0.0398221	0.0917691
RWA	0.0620728	0.0601957	0.0131493	0.0474252	0.0812987	0.0335079	0.092707
PRK	0.0852413	0.0857239	0.0162058	0.0651546	0.106259	0.0547966	0.143641
NGA	0.0675724	0.0653485	0.013521	0.0528547	0.0854414	0.0429865	0.107563
BWA	0.0567575	0.0540059	0.0144977	0.0416303	0.0752425	0.0325599	0.129131
NOR	0.0894552	0.0864372	0.0165385	0.0713914	0.111255	0.0568963	0.162794
BIH	0.0778015	0.0754782	0.0169478	0.0565639	0.100539	0.0475845	0.159115
BOL	0.0829262	0.0811572	0.0137832	0.065642	0.100934	0.057835	0.120557
AZE	0.0661133	0.0652436	0.0141245	0.0486758	0.0848023	0.039125	0.123008
BLR	0.101679	0.098832	0.0205571	0.0795928	0.13306	0.0646261	0.157402
KOR	0.0760883	0.0734235	0.0143718	0.0594666	0.0919359	0.0442771	0.130998
RUS	0.041146	0.0408298	0.00588602	0.0333991	0.0474473	0.028605	0.0590585
PER	0.0612966	0.0594516	0.0133564	0.0443878	0.0801717	0.0338488	0.0992228
VNM	0.0643698	0.0604133	0.0132174	0.0500537	0.0836495	0.0411227	0.100505
PSE	0.0958467	0.0933947	0.0188396	0.0733879	0.126215	0.0642687	0.13757
TUN	0.073444	0.0712285	0.0154233	0.0547546	0.0909963	0.0435195	0.116223
NLD	0.0989057	0.0959282	0.0211926	0.0764403	0.124842	0.0567022	0.16697
GTM	0.0666731	0.0650169	0.0123287	0.0525766	0.0830367	0.0405707	0.106904
URY	0.0619121	0.0586306	0.0146754	0.0478381	0.081442	0.0373093	0.110228
HRV	0.0892777	0.0837225	0.0235496	0.0677046	0.111589	0.0564018	0.188945
IDN	0.0647993	0.0636355	0.0120124	0.0503105	0.0812913	0.0413518	0.0980027
LAO	0.0775432	0.077806	0.014617	0.0612148	0.0975541	0.0478276	0.115982
GUY	0.0598033	0.0581266	0.0102507	0.0476785	0.0746807	0.0378729	0.0809693
SLB	0.0697398	0.0697495	0.0133636	0.0544658	0.0886539	0.0404936	0.105868
ISL	0.0860132	0.0846567	0.0144984	0.067353	0.105375	0.0567434	0.125525
MOZ	0.0732271	0.0703345	0.0154996	0.0559312	0.091291	0.0446936	0.119478
MLI	0.0699055	0.0689386	0.0138472	0.0510264	0.0874518	0.0440184	0.117585
PHL	0.0597343	0.0583638	0.012448	0.0448043	0.0742313	0.0317195	0.097753
CAN	0.077306	0.0755154	0.0137855	0.0621034	0.0954786	0.0503984	0.120039
CMR	0.0664878	0.0647465	0.0128393	0.0504533	0.0865338	0.0426144	0.0985757
FJI	0.0717755	0.0689604	0.0131101	0.0565066	0.0889329	0.050167	0.116517
CIV	0.0607113	0.0582249	0.0141635	0.0460892	0.0769321	0.0349412	0.120039
TUR	0.0816064	0.0786922	0.0154384	0.0630979	0.10253	0.0548023	0.131567
LBR	0.0752272	0.0731388	0.0154038	0.058251	0.0950963	0.0489185	0.126796
BEN	0.0612757	0.0601049	0.01093	0.048948	0.0764714	0.0411504	0.0930987

## Sheet: Stats_CuCl
	mean	median	std	p10	p90	min	max
ARG	0.153859	0.149552	0.0340055	0.110458	0.193536	0.0936353	0.267474
CHE	0.0985705	0.0947201	0.0200949	0.0757201	0.131643	0.0560955	0.150467
USA	0.0901273	0.0871942	0.0175594	0.0695838	0.114192	0.0527249	0.143468
UKR	0.120862	0.116195	0.0215935	0.0942504	0.152494	0.0804651	0.177487
IND	0.110701	0.108512	0.0220484	0.0865811	0.142369	0.0545006	0.158773
ESP	0.146055	0.139437	0.0336177	0.111128	0.188699	0.0876215	0.294847
ARE	0.123629	0.117175	0.0330423	0.086195	0.161309	0.0724768	0.229547
KOR	0.131507	0.128482	0.0289598	0.0985357	0.166241	0.0818336	0.237851
HUN	0.110596	0.10412	0.0264634	0.0792059	0.145266	0.0669678	0.198137
RUS	0.108398	0.105605	0.0232569	0.0794452	0.137243	0.0582893	0.180415
FRA	0.089892	0.0864788	0.0186822	0.0696059	0.108006	0.0534695	0.187153
ZAF	0.159599	0.150646	0.037615	0.118671	0.217711	0.0904969	0.255108
NLD	0.173898	0.169684	0.0384436	0.132446	0.226474	0.100535	0.286922
SVN	0.122083	0.115041	0.0306592	0.0910495	0.171578	0.0589423	0.207606
CZE	0.124303	0.121386	0.0272674	0.0935573	0.164898	0.0707794	0.186726
IRN	0.166438	0.16198	0.0365286	0.126232	0.206337	0.103845	0.29425
MEX	0.14362	0.142986	0.0337101	0.0995064	0.188218	0.0696861	0.235734
JPN	0.191003	0.185684	0.053224	0.137451	0.255426	0.0919938	0.426405
BGR	0.106424	0.103012	0.0222366	0.0799815	0.134597	0.0523983	0.182411
SWE	0.0749074	0.0713	0.0155501	0.0561427	0.0972928	0.0477635	0.118598
FIN	0.128902	0.126103	0.0320343	0.0913087	0.174905	0.068203	0.240231
CAN	0.164815	0.162841	0.0380876	0.119096	0.216738	0.0908015	0.2872
ROU	0.120013	0.114334	0.0295033	0.0888959	0.157305	0.0714089	0.23877
SVK	0.233748	0.228386	0.0597535	0.163944	0.30837	0.141091	0.496836
GBR	0.150336	0.147646	0.0306655	0.11424	0.1887	0.104844	0.26437
PAK	0.134653	0.133536	0.0295225	0.0969766	0.176234	0.077583	0.219146
BRA	0.136392	0.136156	0.0289084	0.100771	0.169987	0.0800191	0.242221
CHN	0.138795	0.132433	0.0360695	0.0970643	0.184298	0.0804498	0.243185
ARM	0.108535	0.103492	0.0216814	0.0865421	0.137444	0.0650869	0.174449
BEL	0.153124	0.14889	0.03308	0.117788	0.196561	0.0848471	0.250182

## Sheet: Stats_HB
	mean	median	std	p10	p90	min	max
CHE	0.292399	0.283362	0.0823843	0.195211	0.405469	0.132051	0.528107
SLV	0.245952	0.240041	0.0636881	0.172913	0.334637	0.119559	0.431977
ARG	0.269839	0.262638	0.0766925	0.181958	0.369102	0.117475	0.529615
PAN	0.206586	0.197141	0.0583773	0.135093	0.283284	0.0892707	0.381024
UKR	0.290159	0.275359	0.0865349	0.19545	0.380352	0.157196	0.547736
GEO	0.21914	0.204659	0.0629697	0.157022	0.299891	0.114349	0.49859
CUB	0.277136	0.258614	0.0904391	0.179578	0.407025	0.158289	0.572766
ECU	0.275577	0.262057	0.0881653	0.18995	0.386491	0.153068	0.663045
DEU	0.235887	0.223527	0.0740116	0.152998	0.324938	0.103004	0.493989
BFA	0.210364	0.194511	0.0712931	0.14709	0.287176	0.103691	0.596648
MDG	0.196748	0.186069	0.0568145	0.130997	0.28474	0.112059	0.339757
KGZ	0.240885	0.221281	0.0716937	0.16406	0.339795	0.11068	0.464207
IRQ	0.22388	0.219146	0.0648434	0.150219	0.305763	0.0872945	0.419137
SOM	0.244922	0.228401	0.0714254	0.163484	0.360521	0.131702	0.428629
NAM	0.187741	0.176361	0.0567568	0.126251	0.258207	0.0905431	0.373731
ARE	0.189876	0.18792	0.0538096	0.122609	0.265526	0.096586	0.344634
HUN	0.227708	0.222376	0.0656735	0.149342	0.318773	0.110582	0.460347
SEN	0.191574	0.185653	0.05145	0.128971	0.257261	0.0869678	0.382426
LBY	0.179285	0.167206	0.0576025	0.115911	0.258388	0.0578743	0.408677
SDN	0.259166	0.242337	0.0810602	0.169204	0.344376	0.138998	0.660812
MYS	0.22157	0.208573	0.0783087	0.151219	0.308382	0.0891511	0.697642
SUR	0.242285	0.233683	0.074352	0.166007	0.343167	0.116901	0.459696
BLZ	0.270762	0.2544	0.0927318	0.17756	0.376503	0.127844	0.71601
SVN	0.250398	0.228606	0.0742855	0.171319	0.351755	0.140221	0.517149
CZE	0.221628	0.208826	0.066245	0.148557	0.312092	0.104602	0.45539
IRN	0.22893	0.219119	0.0694075	0.152838	0.313777	0.115117	0.509253
SLE	0.248134	0.234347	0.072696	0.177892	0.34204	0.147393	0.487711
JOR	0.2012	0.192974	0.0597072	0.132383	0.284164	0.0773407	0.367619
LTU	0.214481	0.203071	0.0608451	0.148471	0.302397	0.115427	0.401577
SWE	0.201513	0.198393	0.0575943	0.133661	0.266122	0.0991524	0.398007
POL	0.236861	0.230551	0.0705401	0.156434	0.328111	0.121703	0.522983
TZA	0.208289	0.201313	0.0569579	0.138287	0.281562	0.121861	0.360625
VEN	0.356449	0.334159	0.103508	0.240971	0.50185	0.194032	0.70722
KEN	0.212546	0.20043	0.0645713	0.149931	0.286703	0.103603	0.454016
SVK	0.234829	0.224504	0.0712534	0.151588	0.313951	0.0973095	0.488133
GBR	0.230714	0.22082	0.07508	0.142668	0.329225	0.119066	0.445557
MAR	0.197588	0.186546	0.0585915	0.132698	0.279367	0.106879	0.373537
AGO	0.227262	0.214997	0.0595668	0.162047	0.310853	0.12183	0.393368
KWT	0.170329	0.16786	0.0491266	0.114968	0.235096	0.0870387	0.323758
UGA	0.23169	0.21644	0.0747598	0.145887	0.334244	0.111557	0.474822
KHM	0.213693	0.20497	0.0586835	0.143726	0.290268	0.124012	0.42581
COD	0.245785	0.234844	0.0751349	0.171551	0.34047	0.121037	0.521523
QAT	0.167338	0.161386	0.0501036	0.108945	0.226082	0.0793525	0.359274
BGD	0.217684	0.20505	0.0598717	0.151358	0.289794	0.119225	0.434223
GRC	0.241159	0.227392	0.0689448	0.158557	0.335507	0.127019	0.447905
IND	0.249594	0.236897	0.0694935	0.163767	0.33508	0.103738	0.452405
MDA	0.269021	0.251609	0.0802111	0.19012	0.369011	0.132611	0.57282
GAB	0.245162	0.232644	0.0692585	0.166717	0.33276	0.118542	0.541703
MWI	0.218173	0.216683	0.059622	0.147094	0.285798	0.109431	0.434487
EGY	0.223157	0.210345	0.0749238	0.148206	0.314258	0.0779735	0.566116
MNE	0.285953	0.270947	0.0859202	0.19176	0.4132	0.140844	0.529173
ZAF	0.190531	0.175491	0.059559	0.119043	0.281212	0.0954852	0.391019
MKD	0.267799	0.260709	0.0964893	0.167039	0.383371	0.118395	0.665914
BHS	0.201657	0.190069	0.0721083	0.133088	0.279593	0.0936231	0.634874
ZWE	0.216898	0.201735	0.0737411	0.145174	0.303345	0.102157	0.572862
IRL	0.231972	0.231363	0.0662212	0.151694	0.307091	0.126414	0.49436
LKA	0.261697	0.25191	0.0817538	0.173361	0.355079	0.11188	0.606832
SRB	0.274265	0.253579	0.0931851	0.17606	0.381436	0.142696	0.651378
COG	0.251358	0.235963	0.0730373	0.170651	0.346593	0.133025	0.505448
NZL	0.206276	0.196309	0.0583001	0.138076	0.291324	0.0958068	0.423036
LVA	0.216852	0.198595	0.0687493	0.135146	0.305716	0.0905901	0.42951
AUS	0.199211	0.184895	0.0545596	0.140037	0.276221	0.100802	0.442271
FLK	0.295162	0.274181	0.0954529	0.184457	0.419688	0.168377	0.570885
ISR	0.195437	0.191735	0.056609	0.126419	0.263915	0.0763863	0.409923
COL	0.204395	0.202136	0.0568603	0.134791	0.284904	0.106108	0.416171
FIN	0.309483	0.299989	0.0885834	0.200884	0.440983	0.134646	0.536168
GMB	0.184949	0.177482	0.0562781	0.121526	0.264042	0.103298	0.353026
PRT	0.218937	0.213086	0.0561275	0.147458	0.27781	0.116761	0.429032
SAU	0.208559	0.198055	0.0666372	0.140869	0.281899	0.101112	0.480372
PNG	0.211365	0.208343	0.0599801	0.14099	0.282243	0.0966226	0.49036
JAM	0.21811	0.206294	0.0726322	0.150796	0.286199	0.125735	0.573247
PAK	0.234206	0.227984	0.0645059	0.155214	0.309653	0.114084	0.512292
ZMB	0.242617	0.233235	0.0646739	0.169013	0.334447	0.124611	0.407755
CHN	0.181824	0.168185	0.0538431	0.123745	0.260739	0.0786151	0.372743
KAZ	0.212268	0.201024	0.0629844	0.14127	0.29543	0.115789	0.407706
ARM	0.233575	0.227172	0.0659447	0.148243	0.309103	0.115185	0.427894
LUX	0.239624	0.230028	0.0688234	0.156132	0.339472	0.115341	0.419386
ALB	0.260489	0.251257	0.0763483	0.17433	0.364973	0.12729	0.503583
HND	0.22915	0.227419	0.0650635	0.156157	0.30295	0.103525	0.455895
NIC	0.218948	0.205772	0.0590413	0.15957	0.305754	0.0859374	0.39168
NER	0.208296	0.194971	0.0585914	0.148892	0.295371	0.102315	0.388011
ETH	0.254442	0.240042	0.0713629	0.172286	0.355345	0.15103	0.52853
GRL	0.305612	0.300424	0.0880881	0.201167	0.433765	0.134142	0.573431
OMN	0.20876	0.196917	0.0641797	0.136568	0.294197	0.0885886	0.463857
ESP	0.241006	0.230471	0.07097	0.166505	0.331457	0.132951	0.478956
TJK	0.232326	0.221113	0.0697732	0.156115	0.306211	0.110013	0.532246
YEM	0.273298	0.267949	0.0765631	0.186748	0.361938	0.125476	0.565363
THA	0.193636	0.188809	0.0548954	0.122247	0.265854	0.086723	0.349414
UZB	0.230533	0.214944	0.0618424	0.154361	0.311521	0.13335	0.42493
DZA	0.197783	0.182004	0.0616587	0.13645	0.280107	0.103602	0.416574
FRA	0.237337	0.225624	0.0704256	0.160543	0.335339	0.123389	0.447789
CRI	0.230985	0.225493	0.0639756	0.150065	0.32221	0.116845	0.373807
AUT	0.208423	0.206844	0.0525943	0.141239	0.271975	0.0969609	0.36841
GHA	0.254305	0.241633	0.0752793	0.168757	0.35466	0.134939	0.505697
MEX	0.201328	0.195233	0.0555137	0.139716	0.266839	0.117098	0.492092
HTI	0.246464	0.231076	0.0746194	0.166927	0.363226	0.125154	0.432424
JPN	0.331162	0.308171	0.0911093	0.231929	0.476031	0.159653	0.562716
NPL	0.214888	0.207608	0.0615192	0.143608	0.286601	0.0952567	0.456453
BGR	0.236919	0.22792	0.0668599	0.16034	0.325354	0.11227	0.54818
DNK	0.198657	0.200246	0.0532131	0.133041	0.264355	0.0881661	0.340924
MMR	0.25007	0.243128	0.0785858	0.16279	0.352449	0.115716	0.542756
SWZ	0.197802	0.188079	0.055781	0.141707	0.267492	0.105592	0.385596
CYP	0.255096	0.250561	0.0772278	0.161651	0.339049	0.109004	0.49465
ROU	0.246294	0.232803	0.083565	0.149153	0.364155	0.0993925	0.579601
DOM	0.217627	0.198998	0.0645762	0.147998	0.309138	0.0966616	0.434202
BRA	0.200774	0.192778	0.0563985	0.138107	0.277264	0.106154	0.419518
ITA	0.231114	0.226153	0.0596506	0.154173	0.302363	0.12542	0.402776
SYR	0.266909	0.254894	0.0806276	0.175315	0.376648	0.124678	0.504582
CHL	0.159589	0.157152	0.0448136	0.107685	0.208947	0.0709568	0.291905
BEL	0.235131	0.220352	0.0695774	0.157163	0.324762	0.10599	0.487265
EST	0.221583	0.212368	0.0721733	0.147263	0.296326	0.119946	0.546899
LBN	0.324046	0.323059	0.095549	0.215752	0.463527	0.162548	0.590451
GIN	0.254063	0.23943	0.0796368	0.165883	0.375075	0.12583	0.440073
BRN	0.206903	0.200518	0.053342	0.148979	0.278403	0.0946393	0.364061
MNG	0.204767	0.191759	0.0591618	0.14019	0.289371	0.118459	0.428866
PRY	0.186698	0.179443	0.0446472	0.139588	0.244647	0.0943532	0.343148
USA	0.202395	0.189528	0.0588768	0.137999	0.282898	0.0999989	0.38088
RWA	0.221324	0.214586	0.0644457	0.150478	0.297893	0.101517	0.45105
PRK	0.248685	0.24266	0.0707075	0.168925	0.33036	0.114767	0.500803
NGA	0.216237	0.209301	0.0613591	0.152267	0.301967	0.109657	0.424086
BWA	0.176183	0.165466	0.0559982	0.121238	0.241528	0.0775461	0.423927
NOR	0.288461	0.270084	0.0805465	0.203984	0.393492	0.132926	0.530171
BIH	0.302564	0.287855	0.084361	0.209276	0.410454	0.156231	0.625005
BOL	0.27175	0.262614	0.0797033	0.167599	0.380058	0.130448	0.488346
AZE	0.230215	0.226411	0.0611816	0.158022	0.298812	0.108544	0.44253
BLR	0.32827	0.315767	0.0992287	0.211905	0.455234	0.162219	0.656392
KOR	0.209455	0.200587	0.0639624	0.130825	0.299889	0.0908437	0.395226
RUS	0.222609	0.223328	0.0609741	0.152689	0.274877	0.0870224	0.456651
PER	0.217772	0.206446	0.0707836	0.144598	0.295933	0.105165	0.481976
VNM	0.20193	0.196076	0.0619012	0.13107	0.281617	0.0742824	0.412047
PSE	0.278346	0.267581	0.0771073	0.19904	0.382109	0.14059	0.509596
TUN	0.228068	0.21144	0.0703471	0.151813	0.320565	0.102252	0.462127
NLD	0.218359	0.205607	0.0653672	0.153603	0.318219	0.0996259	0.416837
GTM	0.233761	0.224757	0.0746816	0.140343	0.33873	0.114082	0.52011
URY	0.168638	0.160894	0.0456574	0.118436	0.224794	0.0878905	0.323468
HRV	0.247118	0.24461	0.0651747	0.169208	0.329515	0.131501	0.458772
IDN	0.213215	0.192472	0.0656136	0.145027	0.318305	0.115108	0.415265
LAO	0.239103	0.226324	0.0675421	0.160969	0.336706	0.120155	0.443045
GUY	0.21658	0.208267	0.0665456	0.137134	0.319163	0.0964429	0.404713
SLB	0.230403	0.227664	0.0610395	0.161392	0.314574	0.0963054	0.398761
ISL	0.342595	0.328956	0.101852	0.223457	0.50234	0.184073	0.57632
MOZ	0.227989	0.215818	0.0640124	0.155487	0.312655	0.098924	0.434282
MLI	0.207875	0.205971	0.056001	0.141939	0.291592	0.110712	0.354811
PHL	0.191374	0.18065	0.0610894	0.126839	0.273388	0.0969261	0.431024
CAN	0.195977	0.184524	0.0658899	0.123189	0.276642	0.0909823	0.451646
CMR	0.245861	0.221932	0.0806073	0.163719	0.366866	0.130915	0.456244
FJI	0.219152	0.208105	0.0618112	0.154512	0.298469	0.104177	0.427029
CIV	0.212351	0.208127	0.0611658	0.147505	0.293971	0.0961014	0.398261
TUR	0.282505	0.267722	0.0805773	0.199798	0.388006	0.132336	0.546329
LBR	0.25287	0.247082	0.0729543	0.169705	0.344744	0.119138	0.474848
BEN	0.205279	0.198648	0.0613626	0.137245	0.279954	0.114894	0.459468

## Sheet: Stats_HTL
	mean	median	std	p10	p90	min	max
CHE	0.196241	0.194757	0.029746	0.161122	0.232836	0.129044	0.30387
SLV	0.139644	0.137355	0.0212803	0.115168	0.168174	0.093369	0.190715
ARG	0.152375	0.153341	0.0268665	0.114252	0.186219	0.0920313	0.225125
PAN	0.123637	0.121711	0.0144361	0.105834	0.142792	0.0994922	0.161824
UKR	0.177109	0.174446	0.0289656	0.139206	0.221566	0.107613	0.235325
GEO	0.104796	0.103769	0.0141022	0.0877529	0.12394	0.0754306	0.137132
CUB	0.173572	0.173276	0.0258482	0.141589	0.203744	0.110899	0.252619
ECU	0.157292	0.154494	0.0238041	0.128435	0.189346	0.11311	0.219457
DEU	0.172547	0.169819	0.0252406	0.142009	0.202522	0.117836	0.268422
BFA	0.12008	0.117517	0.0213996	0.0957068	0.145413	0.075921	0.199235
MDG	0.104646	0.103737	0.0149681	0.0846374	0.126499	0.0746164	0.146363
KGZ	0.125062	0.121455	0.0197555	0.104042	0.154422	0.0813062	0.184751
IRQ	0.143671	0.142946	0.0216765	0.117241	0.166527	0.0955142	0.229662
SOM	0.148097	0.143031	0.0253317	0.116992	0.18774	0.093578	0.219068
NAM	0.117645	0.116374	0.0168193	0.0972574	0.138728	0.0859633	0.167833
ARE	0.119548	0.11795	0.0159189	0.0996312	0.140135	0.0890133	0.188208
HUN	0.134105	0.136391	0.0171376	0.113022	0.156853	0.097998	0.174293
SEN	0.0947963	0.0938083	0.0140757	0.0782958	0.114171	0.0695576	0.131997
LBY	0.0964209	0.0959426	0.0131162	0.0819919	0.115343	0.0621467	0.126608
SDN	0.167833	0.165282	0.0327263	0.130144	0.209073	0.10356	0.267677
MYS	0.10248	0.102804	0.0149908	0.0835702	0.121501	0.0644564	0.145816
SUR	0.122993	0.121009	0.0221591	0.0949347	0.153107	0.0764384	0.179269
BLZ	0.152735	0.152063	0.0203527	0.129841	0.177927	0.113076	0.202954
SVN	0.161886	0.15895	0.0212892	0.134822	0.191164	0.123783	0.21721
CZE	0.118906	0.119493	0.0149689	0.102738	0.137141	0.0888246	0.178334
IRN	0.130556	0.130929	0.0204701	0.104642	0.152012	0.0895711	0.203872
SLE	0.127116	0.125286	0.0196149	0.103588	0.150915	0.0957108	0.198877
JOR	0.125355	0.124866	0.0161351	0.102942	0.144914	0.0961078	0.1752
LTU	0.136833	0.137671	0.0183631	0.117868	0.15608	0.091835	0.195851
SWE	0.113103	0.112605	0.0130829	0.0952557	0.131392	0.0801336	0.149247
POL	0.147218	0.1448	0.0191715	0.125294	0.170758	0.107873	0.201178
TZA	0.105672	0.104814	0.0154081	0.0867221	0.124125	0.0787857	0.151989
VEN	0.202764	0.195376	0.0390889	0.160795	0.251011	0.130269	0.345746
KEN	0.139208	0.13798	0.021639	0.113746	0.166313	0.0958066	0.223086
SVK	0.137142	0.136412	0.0187104	0.114902	0.160129	0.0967064	0.199901
GBR	0.176768	0.1767	0.0224755	0.150394	0.207613	0.127784	0.241931
MAR	0.106919	0.10715	0.0146433	0.0872607	0.121614	0.0682783	0.152794
AGO	0.117849	0.114375	0.0202885	0.0958738	0.142892	0.0766908	0.183786
KWT	0.0953457	0.0959834	0.0115593	0.0808017	0.110603	0.0702695	0.129549
UGA	0.106423	0.104651	0.0179298	0.0846711	0.129461	0.0637427	0.170127
KHM	0.110245	0.110712	0.0156416	0.0911913	0.127895	0.0811826	0.173714
COD	0.126271	0.124988	0.021598	0.0975375	0.156912	0.0838612	0.202786
QAT	0.0950904	0.0939125	0.0126549	0.0780309	0.112314	0.0718023	0.133682
BGD	0.122874	0.12088	0.0172809	0.102106	0.149586	0.0915579	0.165774
GRC	0.1513	0.150136	0.0207436	0.127347	0.183886	0.109242	0.204902
IND	0.0999757	0.0992488	0.0147559	0.0824345	0.120737	0.0740573	0.141863
MDA	0.145331	0.146546	0.0187261	0.12165	0.168577	0.108308	0.197528
GAB	0.145773	0.139232	0.0243819	0.118615	0.18187	0.092735	0.208058
MWI	0.126317	0.125368	0.0227871	0.098057	0.155226	0.0858293	0.19643
EGY	0.132104	0.132265	0.0230789	0.10219	0.158821	0.0752905	0.213973
MNE	0.148215	0.14633	0.0200262	0.123953	0.173253	0.106474	0.220815
ZAF	0.104355	0.104614	0.0145544	0.0856035	0.124655	0.0736377	0.139347
MKD	0.133064	0.130676	0.0214408	0.107043	0.158392	0.0893836	0.205349
BHS	0.131311	0.128955	0.0196973	0.108827	0.158176	0.0974213	0.217332
ZWE	0.134051	0.133112	0.02274	0.106232	0.162886	0.0949924	0.193124
IRL	0.161877	0.160947	0.0214561	0.13629	0.19066	0.119704	0.236272
LKA	0.15391	0.150909	0.0274092	0.120634	0.190954	0.105262	0.244147
SRB	0.139181	0.136956	0.0190464	0.116076	0.167627	0.0987601	0.183296
COG	0.138627	0.131475	0.0235694	0.113971	0.17469	0.106206	0.201274
NZL	0.153479	0.151652	0.0219223	0.130944	0.181663	0.106219	0.226706
LVA	0.133365	0.132701	0.014348	0.114186	0.149118	0.100579	0.188764
AUS	0.156758	0.156693	0.022297	0.130826	0.181122	0.107641	0.226128
FLK	0.139337	0.136648	0.019193	0.116974	0.164996	0.10579	0.204981
ISR	0.132128	0.129346	0.0167057	0.113531	0.151889	0.101858	0.213442
COL	0.104733	0.104044	0.013051	0.0875785	0.119427	0.0731019	0.144511
FIN	0.155487	0.15105	0.0204503	0.130541	0.185079	0.119575	0.223126
GMB	0.0992079	0.0979697	0.0153162	0.080472	0.117978	0.0688265	0.147163
PRT	0.143185	0.141364	0.0173749	0.123685	0.166318	0.0998114	0.197403
SAU	0.146517	0.143922	0.0197332	0.124243	0.171883	0.106608	0.203939
PNG	0.12156	0.120457	0.0179603	0.0984456	0.145846	0.0792701	0.165321
JAM	0.127207	0.126789	0.0158143	0.106322	0.149068	0.0921952	0.161665
PAK	0.146016	0.145499	0.0222978	0.117197	0.173054	0.104681	0.206976
ZMB	0.127511	0.12538	0.02233	0.0986268	0.155464	0.0800187	0.1883
CHN	0.0887668	0.0880088	0.0119469	0.0745652	0.103513	0.0630612	0.11882
KAZ	0.10925	0.108568	0.0132626	0.0939901	0.126211	0.0785912	0.151843
ARM	0.118766	0.11507	0.0176142	0.099349	0.148489	0.0888535	0.168717
LUX	0.172796	0.171794	0.0234479	0.144904	0.202687	0.113792	0.230116
ALB	0.131591	0.12985	0.0194007	0.108704	0.157164	0.0935304	0.192195
HND	0.135761	0.134068	0.0190056	0.115091	0.159612	0.0950748	0.194633
NIC	0.113844	0.11075	0.017712	0.0951182	0.137948	0.0816536	0.173834
NER	0.128978	0.127675	0.0233737	0.097674	0.158395	0.0843641	0.181796
ETH	0.149494	0.149054	0.0224969	0.123913	0.176779	0.100372	0.204538
GRL	0.128124	0.124034	0.0174784	0.108376	0.151349	0.0968022	0.188234
OMN	0.146641	0.144791	0.0209513	0.12199	0.176673	0.101933	0.214355
ESP	0.165215	0.165089	0.0199205	0.141785	0.187042	0.123475	0.250243
TJK	0.1257	0.126526	0.0185284	0.102394	0.147983	0.0901599	0.175354
YEM	0.172394	0.170241	0.0274115	0.140994	0.205964	0.114677	0.268621
THA	0.100052	0.0999148	0.014648	0.0825786	0.118981	0.0616239	0.140168
UZB	0.114923	0.111274	0.017353	0.0963281	0.138453	0.0808986	0.163442
DZA	0.102558	0.101126	0.0138677	0.0859963	0.121044	0.0692752	0.142169
FRA	0.171494	0.170132	0.0239324	0.144483	0.199593	0.117016	0.261014
CRI	0.133584	0.132323	0.0188857	0.110261	0.15979	0.0950297	0.187784
AUT	0.12099	0.122335	0.0147476	0.103292	0.136172	0.0925851	0.16977
GHA	0.136094	0.136137	0.0221032	0.108534	0.161091	0.0888812	0.217377
MEX	0.0970003	0.0961887	0.0136469	0.0819006	0.11641	0.0663513	0.140009
HTI	0.151369	0.149817	0.0243106	0.124719	0.179746	0.103252	0.237415
JPN	0.188246	0.183868	0.0255729	0.157961	0.219097	0.129282	0.268754
NPL	0.11898	0.116897	0.0137998	0.101758	0.137496	0.0906969	0.163331
BGR	0.136226	0.133303	0.0185516	0.113441	0.159464	0.102755	0.196673
DNK	0.16555	0.165823	0.0199247	0.141971	0.191026	0.12578	0.231358
MMR	0.145209	0.143862	0.0204438	0.118071	0.171226	0.103687	0.212105
SWZ	0.104797	0.105184	0.0177842	0.0835375	0.128041	0.0635905	0.147336
CYP	0.149255	0.146637	0.0197409	0.126892	0.168279	0.10109	0.207465
ROU	0.153678	0.151465	0.0202411	0.128436	0.185535	0.119384	0.217354
DOM	0.124452	0.123833	0.0170601	0.103176	0.145035	0.0874314	0.184707
BRA	0.102578	0.101904	0.016183	0.0832961	0.12129	0.0727363	0.147492
ITA	0.132298	0.130651	0.0171733	0.1102	0.155965	0.0934103	0.176078
SYR	0.180394	0.181605	0.0357984	0.133466	0.226706	0.1129	0.285034
CHL	0.100857	0.100528	0.0126579	0.0850728	0.115266	0.0720265	0.155705
BEL	0.166938	0.163561	0.022995	0.139406	0.19667	0.121529	0.270311
EST	0.128046	0.128966	0.0143713	0.109445	0.146682	0.0935831	0.182018
LBN	0.194435	0.193546	0.0315226	0.152629	0.234056	0.122672	0.278886
GIN	0.128454	0.125745	0.0222549	0.102761	0.159535	0.0880736	0.183831
BRN	0.112214	0.110838	0.0140336	0.0955216	0.130481	0.0894257	0.154034
MNG	0.126773	0.125239	0.0186175	0.103335	0.152126	0.0913202	0.179341
PRY	0.108754	0.109544	0.0151937	0.0896208	0.12778	0.0801991	0.161374
USA	0.125617	0.124834	0.0168835	0.104965	0.146955	0.0945603	0.170855
RWA	0.105567	0.10341	0.0186968	0.0858667	0.130676	0.0718917	0.166532
PRK	0.168817	0.167342	0.0272321	0.136134	0.202948	0.105623	0.244772
NGA	0.12213	0.119621	0.0190094	0.100321	0.148943	0.085068	0.168284
BWA	0.090016	0.0884602	0.0126898	0.0748715	0.107777	0.0612734	0.123866
NOR	0.181853	0.180488	0.0269439	0.154753	0.21485	0.127681	0.278474
BIH	0.151178	0.147244	0.0237445	0.123762	0.185391	0.114615	0.216865
BOL	0.157767	0.154304	0.0265609	0.125814	0.190132	0.107826	0.237256
AZE	0.125344	0.124122	0.0158954	0.103568	0.148374	0.095006	0.166916
BLR	0.206761	0.207689	0.0351453	0.160125	0.254864	0.124896	0.29014
KOR	0.145082	0.143237	0.0212252	0.121999	0.163908	0.104093	0.240675
RUS	0.117965	0.116339	0.0172638	0.0996692	0.140573	0.0847826	0.181266
PER	0.0993305	0.100289	0.0134118	0.0808286	0.118197	0.0623086	0.140368
VNM	0.113081	0.111032	0.0134734	0.0964802	0.130449	0.0807988	0.150244
PSE	0.202628	0.203049	0.0327356	0.159843	0.248719	0.134557	0.288243
TUN	0.134464	0.131535	0.0224057	0.109303	0.165306	0.0918647	0.204264
NLD	0.163073	0.163257	0.025209	0.132136	0.19616	0.114183	0.23436
GTM	0.126903	0.122433	0.0170922	0.10874	0.147455	0.101244	0.179996
URY	0.100415	0.0986873	0.0150185	0.0817649	0.118535	0.0744017	0.164073
HRV	0.142375	0.14132	0.0195614	0.121058	0.165607	0.0927639	0.216009
IDN	0.115254	0.114054	0.0155176	0.0963818	0.135406	0.0862277	0.165645
LAO	0.144693	0.138689	0.0265568	0.112511	0.179774	0.098835	0.220192
GUY	0.102897	0.101392	0.0142077	0.0858254	0.124657	0.0779603	0.140334
SLB	0.126438	0.125256	0.0174399	0.106364	0.147924	0.0934722	0.17595
ISL	0.177177	0.177927	0.0280072	0.14158	0.216221	0.125578	0.270919
MOZ	0.129111	0.124802	0.0221053	0.106476	0.160252	0.0885535	0.213831
MLI	0.124467	0.121653	0.0188132	0.104432	0.150813	0.0841595	0.169245
PHL	0.100741	0.0989967	0.0145887	0.0842054	0.116425	0.0704596	0.154293
CAN	0.154221	0.152787	0.019851	0.132073	0.178141	0.105895	0.22791
CMR	0.121359	0.116833	0.0192897	0.101482	0.146368	0.0850152	0.193911
FJI	0.134757	0.13356	0.0184425	0.110612	0.159458	0.101313	0.199973
CIV	0.102793	0.101592	0.0141224	0.0853446	0.119604	0.0749999	0.142342
TUR	0.166793	0.165906	0.0206951	0.145593	0.190313	0.108103	0.218986
LBR	0.128118	0.12494	0.0217148	0.101056	0.161093	0.0859374	0.183156
BEN	0.106013	0.105714	0.0146893	0.0854929	0.122289	0.075364	0.157587

[truncated: 19 more sheets: Stats_HTSE, Stats_HVO_diesel, Stats_HVO_kerosene, Stats_M_PYR, Stats_PTM, Stats_RWGS_FT_diesel, Stats_RWGS_FT_kerosene, Stats_RWGS_MeOH_methanol, Stats_RWGS_MeOH_DME, Stats_RWGS_MeOH_kerosene, Stats_SMR_CCS, Stats_SOEC, Stats_SR_FT_diesel, Stats_SR_FT_kerosene, Stats_ST_FT_diesel, Stats_ST_FT_kerosene, Stats_TG_CCS, Stats_TG_FT_diesel, Stats_TG_FT_kerosene]
