# Supplementary material for: Global cost drivers and regional trade-offs for low-carbon fuels: a prospective techno-economic assessment
Source: Royal Society of Chemistry journal article supplement (doi:10.1039/d5ee05591a), 2026-01-01
Supplement: d5ee05591a2.zip [file monte_carlo_stats_2deg50.xlsx]

## Sheet: Stats_PEM
	mean	median	std	p10	p90	min	max
CHE	0.116445	0.110188	0.0345149	0.0831377	0.156908	0.0516649	0.246979
SLV	0.103651	0.102904	0.025908	0.0729203	0.134946	0.0568557	0.191272
ARG	0.113562	0.111102	0.028413	0.0812252	0.156181	0.061746	0.207075
PAN	0.0980995	0.0919845	0.0284995	0.066966	0.134159	0.0390526	0.218864
UKR	0.113642	0.11095	0.0312269	0.0731291	0.150215	0.053807	0.217485
GEO	0.0880623	0.0845776	0.023409	0.0604088	0.12278	0.0508903	0.145753
CUB	0.116092	0.11454	0.0278009	0.0803663	0.152545	0.0636544	0.182664
ECU	0.116208	0.108952	0.0290507	0.0811271	0.162688	0.060631	0.184288
DEU	0.0770993	0.0753027	0.0197967	0.0544869	0.102885	0.0326776	0.150977
BFA	0.085838	0.0831656	0.0222771	0.0597073	0.112103	0.0474828	0.165344
MDG	0.076855	0.0730872	0.0213989	0.0555371	0.102904	0.0352163	0.160925
KGZ	0.0932558	0.0932628	0.0236271	0.0611411	0.121707	0.0428983	0.155944
IRQ	0.0872291	0.0841565	0.0225371	0.0615547	0.114622	0.049236	0.17847
SOM	0.0792525	0.0750428	0.021591	0.0565637	0.108702	0.0444279	0.146103
NAM	0.0785102	0.0769254	0.0203085	0.0553623	0.10434	0.0455282	0.140634
ARE	0.0640995	0.0626018	0.0166282	0.045785	0.0817905	0.0344455	0.145515
HUN	0.080777	0.0802674	0.020841	0.0573333	0.105314	0.0422956	0.174536
SEN	0.0738944	0.0709522	0.0199575	0.0544369	0.0999113	0.0380393	0.175954
LBY	0.0589531	0.0578103	0.0155394	0.0411904	0.0764244	0.0299054	0.115629
SDN	0.0865857	0.087057	0.0188553	0.0605876	0.110958	0.0417284	0.135298
MYS	0.105479	0.100448	0.0290928	0.0720048	0.143562	0.0600746	0.200839
SUR	0.104489	0.100496	0.0322002	0.0711359	0.152447	0.0454058	0.209746
BLZ	0.111864	0.110228	0.0290132	0.0771264	0.154393	0.0511521	0.197996
SVN	0.107902	0.107073	0.0278171	0.0747468	0.148587	0.056815	0.173657
CZE	0.0831318	0.0787104	0.0236883	0.058101	0.118735	0.0429642	0.15544
IRN	0.0926149	0.0885117	0.0274305	0.0622415	0.12308	0.0530813	0.204781
SLE	0.104099	0.0977998	0.0291103	0.0709998	0.135905	0.0540667	0.23126
JOR	0.0741499	0.0714	0.017474	0.0560656	0.0991973	0.0426871	0.118283
LTU	0.0775045	0.0732831	0.0204878	0.0534453	0.105794	0.043921	0.131572
SWE	0.0738746	0.0693612	0.0218804	0.0481172	0.101093	0.0402916	0.149049
POL	0.0806394	0.0753078	0.0213867	0.058628	0.109444	0.0440196	0.150238
TZA	0.0902149	0.0822481	0.0281255	0.0603205	0.129614	0.0457831	0.182558
VEN	0.14748	0.145067	0.0346278	0.100759	0.189776	0.0790014	0.256965
KEN	0.0838576	0.0810192	0.0227542	0.0563784	0.110482	0.0440551	0.161807
SVK	0.0902931	0.0842906	0.0273305	0.063718	0.122503	0.0535607	0.228052
GBR	0.0766132	0.0728139	0.0199939	0.0559941	0.0996871	0.0479234	0.155529
MAR	0.0653403	0.063089	0.0152282	0.0478553	0.0859988	0.0337121	0.111751
AGO	0.0965243	0.0932887	0.028286	0.0635444	0.136965	0.0520412	0.169586
KWT	0.0531471	0.052091	0.0117463	0.0376508	0.067662	0.0289113	0.0876813
UGA	0.0992541	0.0970597	0.0252652	0.070679	0.134057	0.0500146	0.182639
KHM	0.0977326	0.0963858	0.0275538	0.0648736	0.1313	0.0458176	0.17375
COD	0.0960608	0.093187	0.0247822	0.0677305	0.123838	0.0498858	0.205154
QAT	0.0589685	0.0559617	0.0150327	0.0408517	0.079249	0.0366872	0.0991406
BGD	0.0942912	0.0861463	0.0280748	0.0630012	0.133665	0.0445747	0.202834
GRC	0.102176	0.0971575	0.0312678	0.0684436	0.135552	0.0432521	0.252992
IND	0.0900571	0.0857589	0.0258916	0.0590875	0.12488	0.0461616	0.165008
MDA	0.087727	0.0846881	0.0256326	0.0624818	0.117703	0.0442037	0.20885
GAB	0.109976	0.101769	0.0328076	0.079525	0.157017	0.0519193	0.286088
MWI	0.0866922	0.0861285	0.0217731	0.0609331	0.112583	0.0472417	0.159565
EGY	0.0771346	0.0760805	0.0191663	0.0552687	0.0955638	0.0440708	0.156633
MNE	0.110071	0.106371	0.027171	0.0772746	0.147418	0.0546104	0.189471
ZAF	0.073597	0.0708412	0.0200919	0.0500286	0.0981232	0.0400014	0.148434
MKD	0.101684	0.0972412	0.0292568	0.0709048	0.142619	0.0539252	0.200293
BHS	0.0797253	0.0773544	0.0193851	0.0591774	0.107295	0.0456232	0.145515
ZWE	0.0962224	0.0899698	0.0264044	0.0665605	0.131893	0.0536332	0.175238
IRL	0.0773866	0.0728225	0.0194054	0.0567261	0.104258	0.0472383	0.144228
LKA	0.100004	0.0983135	0.0240329	0.0709019	0.12936	0.0526286	0.197021
SRB	0.104998	0.101366	0.0314775	0.0688106	0.149588	0.0450543	0.191726
COG	0.109744	0.108179	0.0281148	0.0774764	0.151265	0.0641871	0.190105
NZL	0.0758153	0.072782	0.0182357	0.0556621	0.0971294	0.0393149	0.12832
LVA	0.081692	0.0805859	0.0236175	0.0546169	0.110219	0.0379052	0.149156
AUS	0.0747402	0.0742459	0.0163813	0.0527762	0.0934147	0.0385126	0.126367
FLK	0.155194	0.151912	0.0459013	0.0992361	0.211838	0.0746489	0.301225
ISR	0.0691424	0.068181	0.0138937	0.0523257	0.0887636	0.0457831	0.105584
COL	0.0832867	0.0780638	0.0249842	0.0582303	0.112893	0.0345686	0.18339
FIN	0.14467	0.136968	0.0397596	0.10065	0.202203	0.0861698	0.252364
GMB	0.0788469	0.0752492	0.0240093	0.0559854	0.104145	0.0365315	0.171436
PRT	0.082062	0.0799853	0.0189735	0.0606193	0.104779	0.0503138	0.134566
SAU	0.0707651	0.0682596	0.0156554	0.0518939	0.0908514	0.0458828	0.116603
PNG	0.0940135	0.0932687	0.024936	0.0644313	0.124409	0.0490132	0.191207
JAM	0.0920494	0.0856142	0.0240087	0.0655739	0.124858	0.0530106	0.172985
PAK	0.104455	0.102062	0.0276432	0.0705416	0.143712	0.0578689	0.193594
ZMB	0.101402	0.0984553	0.0253053	0.0717001	0.133197	0.0537981	0.183739
CHN	0.0640529	0.0601506	0.0149673	0.0490148	0.0853402	0.0362084	0.109246
KAZ	0.0714648	0.0698316	0.0196427	0.0507176	0.0972093	0.036253	0.141534
ARM	0.0944796	0.0897403	0.0276636	0.0621915	0.134526	0.0521686	0.188933
LUX	0.0839414	0.080078	0.020357	0.0616075	0.110905	0.0460356	0.149226
ALB	0.0998983	0.0959552	0.0269052	0.0716399	0.134819	0.0453826	0.180232
HND	0.0958158	0.0942117	0.0273127	0.0623769	0.123589	0.0424501	0.185591
NIC	0.0957501	0.0890024	0.0262796	0.0696344	0.133471	0.0555013	0.191545
NER	0.0763625	0.0716204	0.0212047	0.0551241	0.102098	0.0358666	0.168307
ETH	0.106782	0.103051	0.0288736	0.0742564	0.148866	0.0642053	0.202881
GRL	0.147644	0.143561	0.0457672	0.0961328	0.194895	0.0801994	0.40377
OMN	0.0695063	0.0680719	0.0155755	0.0521056	0.0890503	0.0414163	0.114091
ESP	0.0842406	0.0807756	0.0227088	0.0574529	0.116172	0.0497651	0.155215
TJK	0.0913897	0.0875392	0.0237382	0.0645317	0.125316	0.0482043	0.188107
YEM	0.121594	0.118251	0.028891	0.0866179	0.157761	0.0598913	0.213395
THA	0.0915112	0.0860666	0.0266897	0.0629748	0.13462	0.0507725	0.189631
UZB	0.0703441	0.0677945	0.0208476	0.0465405	0.0992611	0.0406055	0.14447
DZA	0.0779879	0.076715	0.0221071	0.0505581	0.105191	0.0395581	0.146367
FRA	0.0795454	0.0788432	0.0168307	0.0579173	0.0999866	0.0464912	0.126573
CRI	0.10557	0.100045	0.0277533	0.0755596	0.143656	0.0532338	0.189682
AUT	0.0772958	0.0715875	0.0220424	0.0533896	0.10932	0.0393263	0.169155
GHA	0.108269	0.104106	0.0296637	0.0716782	0.152262	0.050808	0.198259
MEX	0.0823073	0.07997	0.0247585	0.0554328	0.118991	0.0400133	0.158231
HTI	0.0951147	0.0923309	0.0262789	0.0617826	0.127018	0.045996	0.196577
JPN	0.122318	0.11983	0.0348967	0.0778227	0.16501	0.0610053	0.21914
NPL	0.0948112	0.0893396	0.0304848	0.0633464	0.135563	0.0505883	0.202623
BGR	0.0932466	0.0903569	0.023839	0.065514	0.12559	0.0492736	0.159831
DNK	0.0708009	0.067832	0.0173513	0.050583	0.0946794	0.0397016	0.123434
MMR	0.114641	0.108233	0.0307915	0.0814788	0.152952	0.0647155	0.20656
SWZ	0.0829762	0.080275	0.0206427	0.0600748	0.113065	0.0470911	0.14879
CYP	0.114248	0.109587	0.0358971	0.0762236	0.152512	0.0561542	0.30972
ROU	0.103063	0.100907	0.0296205	0.0684759	0.140572	0.0573044	0.19862
DOM	0.0911163	0.0842498	0.0282112	0.0619578	0.135389	0.0493735	0.203478
BRA	0.0883669	0.0820716	0.0300162	0.0581039	0.128583	0.0441527	0.20113
ITA	0.0976231	0.0924843	0.0302677	0.0643621	0.132794	0.0473551	0.237201
SYR	0.0941131	0.0884839	0.0265488	0.0664559	0.12884	0.0498956	0.185678
CHL	0.0630304	0.0603228	0.0162769	0.0455701	0.0858427	0.0321167	0.12539
BEL	0.0779163	0.0760263	0.0184823	0.0558193	0.107869	0.0485613	0.130247
EST	0.0801192	0.0768708	0.0240996	0.0546649	0.11514	0.0451117	0.18565
LBN	0.142987	0.141696	0.0345193	0.0966109	0.188219	0.0756715	0.262246
GIN	0.105666	0.100789	0.0275735	0.0768176	0.143182	0.0547886	0.20109
BRN	0.0916559	0.0852806	0.0295389	0.061364	0.129713	0.0504761	0.249972
MNG	0.076189	0.073479	0.0210369	0.0546645	0.103041	0.0355509	0.174543
PRY	0.0815982	0.0756428	0.0240332	0.0556455	0.109614	0.0446599	0.16492
USA	0.0651098	0.0607767	0.0174934	0.0474163	0.0865027	0.0394127	0.135363
RWA	0.0983223	0.0936499	0.0276906	0.0708837	0.128202	0.040938	0.204351
PRK	0.0994414	0.0993714	0.0228776	0.0739961	0.127367	0.0498207	0.164831
NGA	0.0942808	0.0892962	0.0291686	0.0615091	0.130488	0.0533064	0.221445
BWA	0.0696624	0.0654329	0.0197151	0.0502718	0.0940503	0.0365717	0.131383
NOR	0.0991931	0.0943546	0.0253803	0.0728363	0.134522	0.0518959	0.17631
BIH	0.127026	0.122247	0.0410935	0.0822133	0.171191	0.0608477	0.336726
BOL	0.107703	0.1043	0.0267371	0.0717699	0.138981	0.053229	0.18809
AZE	0.0986335	0.0936589	0.0297809	0.0671532	0.139045	0.0493203	0.202237
BLR	0.127117	0.119608	0.0320112	0.092139	0.171581	0.0725596	0.223532
KOR	0.0894807	0.0887562	0.0201729	0.0645475	0.113769	0.0550973	0.146925
RUS	0.0855966	0.0816289	0.0243641	0.0603039	0.114425	0.0329844	0.161339
PER	0.089573	0.0854288	0.0266525	0.0616333	0.128738	0.0396282	0.17761
VNM	0.0911555	0.087432	0.0260691	0.0637533	0.122075	0.0497028	0.220022
PSE	0.100206	0.0979721	0.021792	0.0719549	0.129253	0.0523546	0.171441
TUN	0.0867252	0.0801733	0.025201	0.0607427	0.119488	0.048256	0.16703
NLD	0.0731382	0.0704218	0.0160798	0.0553337	0.0936687	0.0450785	0.139744
GTM	0.10208	0.0944223	0.0266676	0.076082	0.143523	0.0586197	0.18584
URY	0.0660062	0.062836	0.0160901	0.0474858	0.0900383	0.0364672	0.106141
HRV	0.0953736	0.092719	0.027572	0.0638832	0.139241	0.0444588	0.191556
IDN	0.0878764	0.0846038	0.026031	0.0598156	0.123039	0.0400129	0.175648
LAO	0.0959715	0.0951676	0.0235838	0.0662632	0.12338	0.0474088	0.178969
GUY	0.0958542	0.0902898	0.0320369	0.06226	0.13533	0.0421436	0.21807
SLB	0.097983	0.093985	0.027398	0.0668378	0.125611	0.0454707	0.203818
ISL	0.159959	0.15573	0.0463695	0.0996087	0.225051	0.0693639	0.31506
MOZ	0.103392	0.100637	0.0261225	0.0723209	0.140599	0.0612303	0.170963
MLI	0.0748529	0.0733035	0.0179298	0.0518309	0.0984707	0.0367515	0.126945
PHL	0.09235	0.0896389	0.024676	0.0633074	0.12852	0.0495313	0.158053
CAN	0.0727605	0.0739953	0.0166839	0.0524489	0.0981953	0.044764	0.119515
CMR	0.104552	0.100911	0.0290553	0.0710726	0.143026	0.0550857	0.205695
FJI	0.0886788	0.0867978	0.0218211	0.062202	0.11968	0.0410699	0.166576
CIV	0.0967529	0.0894271	0.0275	0.0640815	0.130585	0.0553597	0.216452
TUR	0.113551	0.106356	0.0310529	0.0822626	0.155715	0.062877	0.2091
LBR	0.102757	0.0970298	0.0287493	0.0728368	0.139304	0.0473232	0.202276
BEN	0.0982463	0.0942804	0.0272333	0.0639074	0.138806	0.0488297	0.181482

## Sheet: Stats_DAC
	mean	median	std	p10	p90	min	max
CHE	0.233969	0.217557	0.0630116	0.169528	0.319341	0.127526	0.477189
SLV	0.177619	0.172787	0.0468444	0.11794	0.232225	0.083815	0.368996
ARG	0.184875	0.177404	0.0584265	0.118474	0.255059	0.0924041	0.379412
PAN	0.185257	0.179828	0.0546234	0.123536	0.245239	0.080103	0.363352
UKR	0.18579	0.179118	0.0538405	0.125084	0.248621	0.095082	0.426268
GEO	0.156741	0.151642	0.0505363	0.10111	0.225034	0.0627048	0.321246
CUB	0.19602	0.190733	0.0504018	0.136822	0.261111	0.0925807	0.396095
ECU	0.20211	0.184291	0.0682621	0.133707	0.28578	0.0978704	0.451865
DEU	0.161539	0.159877	0.0381544	0.117936	0.212593	0.0848114	0.280745
BFA	0.157809	0.151865	0.0446913	0.111276	0.219798	0.0686476	0.343443
MDG	0.141085	0.135562	0.039731	0.0944229	0.198868	0.0632019	0.25579
KGZ	0.165703	0.158725	0.0467539	0.112604	0.222558	0.0893117	0.337944
IRQ	0.157563	0.152464	0.04989	0.100277	0.222539	0.072438	0.340145
SOM	0.124527	0.12047	0.0327479	0.0891664	0.167803	0.0495362	0.256298
NAM	0.137898	0.132031	0.0431336	0.0918711	0.188887	0.0682004	0.327383
ARE	0.126464	0.120203	0.0354142	0.0873992	0.170387	0.0654435	0.232967
HUN	0.162974	0.157407	0.0520372	0.103831	0.219778	0.0763603	0.391541
SEN	0.133918	0.127021	0.0464632	0.0804564	0.190757	0.0615355	0.295379
LBY	0.10553	0.103063	0.031631	0.0632527	0.146986	0.0477267	0.185912
SDN	0.117873	0.115177	0.0306656	0.0801268	0.159444	0.0522184	0.204799
MYS	0.211681	0.202738	0.0671334	0.139517	0.300171	0.0922499	0.397118
SUR	0.185645	0.179368	0.060222	0.114139	0.272229	0.0873653	0.360758
BLZ	0.195276	0.174385	0.0586531	0.140088	0.266145	0.0797904	0.40544
SVN	0.220086	0.202345	0.0658531	0.152972	0.307561	0.0986624	0.442336
CZE	0.181356	0.173747	0.0579918	0.114093	0.246629	0.0942694	0.399634
IRN	0.169726	0.160351	0.0484025	0.113161	0.238451	0.0817225	0.363521
SLE	0.190453	0.18381	0.0694655	0.110741	0.266713	0.084392	0.4961
JOR	0.134983	0.130921	0.04162	0.085111	0.191294	0.0609749	0.288489
LTU	0.157499	0.156598	0.0452415	0.103726	0.22335	0.0852158	0.341932
SWE	0.142267	0.137731	0.0452905	0.0836489	0.198162	0.0648776	0.296877
POL	0.159645	0.154865	0.0379778	0.114751	0.207588	0.0885017	0.299941
TZA	0.184527	0.18463	0.0603072	0.113568	0.261648	0.0704461	0.373406
VEN	0.249751	0.23122	0.0766811	0.164007	0.342322	0.0892036	0.50237
KEN	0.155001	0.145974	0.0452103	0.109864	0.205327	0.0764303	0.343161
SVK	0.178989	0.173421	0.0496753	0.126133	0.2373	0.0889086	0.370085
GBR	0.150946	0.143952	0.0410314	0.103977	0.195169	0.0881288	0.300699
MAR	0.119166	0.112855	0.0337707	0.0846919	0.169602	0.0606219	0.23084
AGO	0.172037	0.154091	0.0554046	0.114167	0.236469	0.0823273	0.414859
KWT	0.101383	0.0963411	0.032269	0.0666212	0.143196	0.041824	0.24499
UGA	0.187499	0.173894	0.073089	0.117964	0.276693	0.0779782	0.46933
KHM	0.169538	0.163733	0.0545587	0.108218	0.242016	0.0647814	0.322868
COD	0.178533	0.170361	0.0568255	0.118417	0.263552	0.081415	0.351954
QAT	0.117528	0.110718	0.0410078	0.0721392	0.162087	0.0432707	0.26645
BGD	0.188381	0.178905	0.0569436	0.126309	0.261715	0.0740224	0.352992
GRC	0.199876	0.193989	0.0596745	0.13485	0.272498	0.0880995	0.370548
IND	0.182742	0.168517	0.0680349	0.110514	0.277234	0.0612638	0.411912
MDA	0.161561	0.151562	0.0522322	0.110622	0.223418	0.0827289	0.392461
GAB	0.211952	0.191495	0.0894148	0.129069	0.298447	0.0993339	0.754043
MWI	0.152657	0.143416	0.0505953	0.098355	0.217979	0.0758329	0.32136
EGY	0.140663	0.136886	0.0381158	0.094356	0.197293	0.070701	0.240729
MNE	0.225632	0.21047	0.0803611	0.134402	0.326971	0.0933314	0.561804
ZAF	0.135152	0.127004	0.0425864	0.092037	0.18576	0.0710997	0.309359
MKD	0.197808	0.191192	0.059368	0.12845	0.288348	0.0858699	0.372618
BHS	0.142825	0.138503	0.0409008	0.0889417	0.195427	0.0798437	0.265029
ZWE	0.148595	0.144251	0.042953	0.101624	0.214865	0.0831195	0.325705
IRL	0.162092	0.159406	0.041751	0.113224	0.210441	0.0847596	0.325049
LKA	0.168124	0.160377	0.0509724	0.109094	0.230428	0.0741034	0.325766
SRB	0.1941	0.190934	0.0483801	0.138727	0.256626	0.0966539	0.362125
COG	0.211439	0.204419	0.0650633	0.132414	0.305711	0.0963946	0.385411
NZL	0.155798	0.148178	0.041047	0.118206	0.20375	0.0723543	0.31384
LVA	0.157408	0.145113	0.0501857	0.107074	0.215696	0.0769019	0.359816
AUS	0.148015	0.138045	0.0396781	0.10437	0.193492	0.0888898	0.273123
FLK	0.333325	0.315112	0.130183	0.191871	0.505461	0.13094	1.00722
ISR	0.133516	0.128012	0.0390529	0.0961587	0.17813	0.0687144	0.271969
COL	0.16122	0.157011	0.0456391	0.109175	0.226061	0.0656217	0.324955
FIN	0.297805	0.279304	0.100637	0.184934	0.444651	0.119743	0.71649
GMB	0.139977	0.13476	0.0504723	0.0831817	0.19324	0.0663129	0.367709
PRT	0.158392	0.152844	0.0451104	0.120218	0.206614	0.081494	0.315132
SAU	0.143588	0.137273	0.0422613	0.0958059	0.193149	0.064729	0.33787
PNG	0.182516	0.174421	0.0587464	0.111373	0.254602	0.08483	0.391167
JAM	0.178898	0.170951	0.052233	0.118324	0.247156	0.0843753	0.369834
PAK	0.184575	0.177906	0.0525175	0.118244	0.254778	0.0828173	0.357361
ZMB	0.176235	0.155978	0.0670889	0.11065	0.270713	0.0812829	0.450709
CHN	0.118312	0.110252	0.0361122	0.0795697	0.163184	0.0497173	0.292055
KAZ	0.129746	0.121732	0.0391311	0.0906365	0.187369	0.0670327	0.264286
ARM	0.182623	0.165937	0.0655498	0.109809	0.26215	0.0769356	0.376065
LUX	0.176531	0.176445	0.051354	0.115369	0.23651	0.0794555	0.33582
ALB	0.198974	0.192381	0.0630037	0.136328	0.290105	0.0994388	0.457332
HND	0.190884	0.181553	0.0580751	0.128713	0.270176	0.0738866	0.427473
NIC	0.178562	0.171097	0.0582009	0.0985262	0.246774	0.0801928	0.342737
NER	0.114026	0.110467	0.0289553	0.0802701	0.151349	0.0600666	0.215665
ETH	0.187237	0.181505	0.0572986	0.121857	0.251404	0.100642	0.40952
GRL	0.308291	0.298571	0.108664	0.189712	0.435812	0.138458	0.858765
OMN	0.135273	0.124849	0.042642	0.0879705	0.192755	0.056638	0.27078
ESP	0.166005	0.158887	0.0411803	0.115912	0.21472	0.0804252	0.280401
TJK	0.168258	0.153998	0.0597561	0.107378	0.238662	0.0720017	0.418154
YEM	0.209809	0.201993	0.0608619	0.136769	0.29367	0.0922643	0.355947
THA	0.168903	0.157781	0.0555665	0.108915	0.249779	0.0904548	0.409082
UZB	0.129581	0.123162	0.0433464	0.084611	0.194684	0.0611346	0.274196
DZA	0.14481	0.137972	0.0551206	0.0858974	0.206894	0.063002	0.366729
FRA	0.156813	0.155014	0.0399494	0.102465	0.214416	0.0833624	0.240255
CRI	0.204307	0.187885	0.0765654	0.12729	0.268542	0.102671	0.630364
AUT	0.155966	0.145145	0.0559495	0.0928389	0.221817	0.0765561	0.365211
GHA	0.209047	0.203892	0.0663182	0.139061	0.286497	0.0893163	0.503384
MEX	0.158004	0.147563	0.0555802	0.0949511	0.225983	0.0589778	0.337492
HTI	0.171343	0.157113	0.0602976	0.109261	0.251769	0.0784824	0.380325
JPN	0.272928	0.266486	0.0854147	0.175143	0.372865	0.139212	0.5162
NPL	0.179588	0.165195	0.060485	0.108345	0.261138	0.0756884	0.385058
BGR	0.190146	0.180022	0.0575124	0.125501	0.26265	0.103767	0.460196
DNK	0.143896	0.140486	0.0357705	0.104107	0.186448	0.0759699	0.288382
MMR	0.193165	0.183264	0.0543407	0.130944	0.263779	0.104369	0.358588
SWZ	0.153298	0.144067	0.0558739	0.0854118	0.212056	0.05564	0.331058
CYP	0.217704	0.211792	0.0694167	0.142041	0.310407	0.0860741	0.481127
ROU	0.206575	0.201036	0.0632683	0.129422	0.29141	0.102566	0.365508
DOM	0.164456	0.152458	0.0443454	0.118531	0.227974	0.0848426	0.348948
BRA	0.157844	0.148695	0.0491531	0.103126	0.227484	0.0673368	0.293037
ITA	0.190768	0.176813	0.0630779	0.116583	0.276011	0.0841154	0.362717
SYR	0.126502	0.121898	0.0321359	0.0904045	0.171459	0.0680492	0.220868
CHL	0.122162	0.115257	0.0393369	0.0799988	0.169423	0.0556436	0.256461
BEL	0.163296	0.152084	0.0439763	0.118964	0.232401	0.0891232	0.307418
EST	0.154128	0.144184	0.047233	0.106306	0.212425	0.0802497	0.343463
LBN	0.249576	0.237452	0.0841624	0.154488	0.349092	0.119938	0.618909
GIN	0.175787	0.171112	0.0554402	0.106399	0.24547	0.0760705	0.321794
BRN	0.178997	0.17969	0.0486225	0.117955	0.239814	0.0745581	0.354091
MNG	0.139867	0.129308	0.0434331	0.0940577	0.205394	0.0726674	0.289428
PRY	0.152935	0.149075	0.0439898	0.0939007	0.216075	0.0776274	0.251236
USA	0.138488	0.13251	0.0442123	0.0842997	0.197476	0.0750004	0.259264
RWA	0.185314	0.183991	0.0619962	0.104204	0.26634	0.0802203	0.345894
PRK	0.151645	0.141722	0.0390509	0.109974	0.204517	0.0877786	0.300828
NGA	0.165792	0.155688	0.0617892	0.102442	0.225299	0.0708177	0.445809
BWA	0.130719	0.12022	0.0489218	0.0770316	0.191496	0.0507481	0.29434
NOR	0.210414	0.20553	0.0590487	0.1356	0.285325	0.107442	0.407212
BIH	0.246885	0.244097	0.0809795	0.152529	0.346098	0.0945706	0.506745
BOL	0.203718	0.193316	0.058935	0.138434	0.278674	0.101145	0.392058
AZE	0.194485	0.179446	0.069379	0.120329	0.283752	0.0886599	0.473201
BLR	0.201734	0.190949	0.0568588	0.133252	0.263247	0.0864508	0.395503
KOR	0.181483	0.171552	0.0561807	0.118371	0.243361	0.0733168	0.390851
RUS	0.152665	0.146873	0.0460758	0.103354	0.211353	0.0603284	0.297262
PER	0.185079	0.184385	0.0613574	0.107872	0.265689	0.0737845	0.357826
VNM	0.168158	0.158678	0.0544711	0.103966	0.239519	0.0605229	0.337426
PSE	0.151091	0.143396	0.0452368	0.104872	0.203163	0.0699943	0.303752
TUN	0.140647	0.134373	0.0435418	0.0937767	0.203329	0.0748147	0.319893
NLD	0.152817	0.140155	0.0476292	0.10631	0.210612	0.0860865	0.346947
GTM	0.185292	0.18666	0.0505237	0.115557	0.251975	0.0932272	0.30864
URY	0.12166	0.117724	0.0376329	0.077546	0.159288	0.0657819	0.271987
HRV	0.195059	0.185287	0.0638971	0.123648	0.288883	0.0850431	0.391257
IDN	0.176833	0.172082	0.0513606	0.122583	0.227348	0.0789918	0.38833
LAO	0.181934	0.169073	0.0586819	0.115201	0.269007	0.0925226	0.344681
GUY	0.174791	0.171005	0.059612	0.111125	0.241545	0.0641619	0.430061
SLB	0.182765	0.168708	0.0600282	0.117365	0.255126	0.0744108	0.381982
ISL	0.3373	0.321746	0.120256	0.203089	0.481956	0.153008	0.828827
MOZ	0.177559	0.172073	0.0561145	0.116593	0.241676	0.0764513	0.496463
MLI	0.116305	0.115392	0.03463	0.0749447	0.162022	0.0496197	0.239792
PHL	0.181443	0.173374	0.0530493	0.117364	0.256524	0.0879883	0.364861
CAN	0.143692	0.13935	0.0330186	0.102191	0.189215	0.0741058	0.238511
CMR	0.169409	0.168454	0.0479146	0.108796	0.218463	0.0717189	0.358954
FJI	0.167242	0.155847	0.0532077	0.110979	0.227842	0.0723638	0.373847
CIV	0.177318	0.173769	0.0624318	0.110376	0.238664	0.0692497	0.41329
TUR	0.222831	0.208332	0.0623568	0.153219	0.30746	0.094855	0.42555
LBR	0.175275	0.167662	0.0561079	0.117756	0.231911	0.079297	0.468653
BEN	0.182609	0.177528	0.0560808	0.115366	0.260799	0.0851033	0.371606

## Sheet: Stats_AD
	mean	median	std	p10	p90	min	max
CHE	0.124296	0.122253	0.0172025	0.10424	0.148355	0.0848239	0.168852
SLV	0.0989146	0.0983243	0.0163135	0.0796518	0.121113	0.0690076	0.145789
ARG	0.0875658	0.0857012	0.0176086	0.0678262	0.108016	0.0561844	0.148329
PAN	0.0927631	0.0917292	0.0116178	0.0793259	0.10852	0.0688036	0.124057
UKR	0.118911	0.116116	0.0204448	0.0980997	0.145613	0.0807406	0.18804
GEO	0.0828004	0.0814145	0.0115533	0.0696609	0.0998218	0.0604737	0.114212
CUB	0.114018	0.111753	0.0195167	0.091585	0.139188	0.0802228	0.177543
ECU	0.0922848	0.0929148	0.0162265	0.0711256	0.113276	0.0594737	0.134668
DEU	0.124471	0.123087	0.0164832	0.10484	0.145835	0.0926804	0.178674
BFA	0.076868	0.0747583	0.0143486	0.0595714	0.0944376	0.0507574	0.122144
MDG	0.0706634	0.0679082	0.0109877	0.058325	0.0873992	0.0496417	0.100684
KGZ	0.0891107	0.0889274	0.012336	0.0741546	0.104205	0.0630259	0.127924
IRQ	0.0963781	0.0934105	0.013605	0.0812757	0.114305	0.0699433	0.136863
SOM	0.0856175	0.0847433	0.0151119	0.0688481	0.104647	0.0525152	0.127656
NAM	0.0715757	0.0709432	0.0107031	0.058988	0.0846157	0.0474013	0.0984779
ARE	0.0875935	0.0856763	0.0110539	0.0742907	0.100949	0.0680524	0.121066
HUN	0.0956993	0.094648	0.0129892	0.0805468	0.111092	0.0708028	0.133172
SEN	0.0547268	0.0525953	0.0103076	0.0443613	0.0672823	0.0376601	0.0873737
LBY	0.0624655	0.0619857	0.00802584	0.0528183	0.0737883	0.0449942	0.0821095
SDN	0.0909105	0.0877064	0.0208286	0.0687277	0.122733	0.0532491	0.147856
MYS	0.0640611	0.0621633	0.0104211	0.0514583	0.0782915	0.042508	0.0933295
SUR	0.0775197	0.0763822	0.0139216	0.0608439	0.0990668	0.0513943	0.114219
BLZ	0.103744	0.103213	0.0152079	0.0833004	0.122637	0.0675812	0.156005
SVN	0.12082	0.11928	0.0176891	0.0963212	0.146658	0.0858431	0.165841
CZE	0.0851244	0.0838237	0.0117307	0.0705825	0.101131	0.0639533	0.119958
IRN	0.0953927	0.0929308	0.0142092	0.0774256	0.114801	0.073104	0.134447
SLE	0.0817992	0.0801759	0.0147744	0.0633418	0.100781	0.0505956	0.122492
JOR	0.0882646	0.0858967	0.012057	0.0744806	0.104361	0.0696586	0.124918
LTU	0.0965717	0.0955365	0.0118481	0.0819607	0.112585	0.0656574	0.127272
SWE	0.0895888	0.087483	0.0121949	0.0742559	0.10399	0.0636071	0.126994
POL	0.103871	0.10391	0.0144411	0.087554	0.120608	0.0759708	0.153146
TZA	0.0725407	0.0713331	0.0120944	0.0581088	0.0891925	0.0519816	0.114094
VEN	0.112694	0.10906	0.0244488	0.0840371	0.144819	0.0712934	0.191263
KEN	0.10898	0.106202	0.0151454	0.0921091	0.130023	0.0815447	0.151505
SVK	0.106685	0.103479	0.012744	0.0934787	0.12598	0.0839137	0.141827
GBR	0.133599	0.130679	0.0173683	0.115137	0.156816	0.0998884	0.180628
MAR	0.0691996	0.0690915	0.00932062	0.0562418	0.0812929	0.0502117	0.0928933
AGO	0.0784163	0.076449	0.0138889	0.0622996	0.0997581	0.0515884	0.117559
KWT	0.074286	0.0731735	0.00978327	0.0631227	0.0874299	0.0555728	0.103693
UGA	0.0624128	0.0621751	0.0113644	0.048231	0.077073	0.0410511	0.0959299
KHM	0.0883931	0.0854586	0.0126968	0.075026	0.105353	0.0589511	0.122131
COD	0.0909461	0.0903174	0.0131182	0.0746933	0.108511	0.0650226	0.123564
QAT	0.0761098	0.0739879	0.00997545	0.0648906	0.0895007	0.0523841	0.109507
BGD	0.0927067	0.0900245	0.0128944	0.0765328	0.108559	0.068651	0.129674
GRC	0.112087	0.111166	0.0141662	0.0949218	0.127416	0.0830854	0.156824
IND	0.067801	0.0671153	0.0105622	0.0548294	0.0805839	0.0491764	0.0980286
MDA	0.0972634	0.0953691	0.0145998	0.0802907	0.118442	0.068802	0.139866
GAB	0.0949186	0.09317	0.0153663	0.0771724	0.117741	0.0622066	0.13663
MWI	0.0787356	0.0769636	0.0140086	0.0630527	0.0993638	0.0539944	0.118294
EGY	0.0735299	0.0724533	0.0127688	0.0575225	0.0899055	0.0499537	0.117736
MNE	0.101301	0.100165	0.0140493	0.0838102	0.120891	0.0747875	0.138222
ZAF	0.0692487	0.0682396	0.00950633	0.0605332	0.0816119	0.0519176	0.100765
MKD	0.0952893	0.0941704	0.0121668	0.081947	0.112314	0.0699811	0.12942
BHS	0.0933776	0.0918582	0.0123869	0.0797668	0.110018	0.0651403	0.138926
ZWE	0.0833579	0.0816963	0.0142567	0.064796	0.102539	0.0574109	0.119608
IRL	0.122906	0.120943	0.0147477	0.105039	0.144165	0.0924839	0.155653
LKA	0.102982	0.10225	0.017223	0.0830466	0.125797	0.0688238	0.16379
SRB	0.0976053	0.0963456	0.0140737	0.0807422	0.118002	0.073907	0.135141
COG	0.0872815	0.0863712	0.0149678	0.0691619	0.105266	0.0556404	0.133683
NZL	0.103564	0.102135	0.0146344	0.0863856	0.121356	0.0726939	0.143687
LVA	0.107364	0.105717	0.0134674	0.0922458	0.124341	0.074436	0.144593
AUS	0.105017	0.10273	0.0154882	0.0877628	0.125949	0.0730218	0.150964
FLK	0.108854	0.105376	0.0179225	0.0904749	0.13235	0.0787154	0.176763
ISR	0.0933188	0.0933268	0.0130039	0.0778294	0.10965	0.0702556	0.132189
COL	0.0675598	0.0655693	0.0102285	0.0560723	0.0833549	0.0483335	0.0984365
FIN	0.121627	0.123403	0.0159876	0.102172	0.139598	0.090796	0.182728
GMB	0.0662697	0.0653241	0.0097356	0.0547713	0.0793899	0.0485012	0.0920269
PRT	0.109979	0.108244	0.0133124	0.093652	0.129902	0.0895877	0.147497
SAU	0.098206	0.0972544	0.0130105	0.0828968	0.116691	0.0734274	0.135931
PNG	0.0898658	0.0876265	0.0132598	0.074939	0.110558	0.0637302	0.134352
JAM	0.0921482	0.0914421	0.0128636	0.077731	0.10761	0.0654231	0.131408
PAK	0.100694	0.0989996	0.0140834	0.0851335	0.121061	0.0768242	0.14233
ZMB	0.081733	0.0807912	0.0146172	0.0655568	0.103468	0.0507752	0.118375
CHN	0.0560065	0.056379	0.00869216	0.0450135	0.0673046	0.0380296	0.0869797
KAZ	0.0807626	0.0790295	0.0115619	0.0669585	0.0979161	0.0566078	0.122284
ARM	0.0895729	0.087565	0.0136628	0.0741878	0.105749	0.065177	0.146104
LUX	0.122861	0.120938	0.0172302	0.101962	0.145233	0.093233	0.184592
ALB	0.0928548	0.0932468	0.0125451	0.0759711	0.108214	0.0689169	0.130405
HND	0.0972116	0.095653	0.0149572	0.0788846	0.119421	0.0687227	0.131577
NIC	0.0696134	0.0678452	0.0136729	0.0539833	0.0895517	0.0466624	0.112775
NER	0.0777099	0.0752358	0.0152448	0.0592327	0.0971742	0.0531501	0.117472
ETH	0.090935	0.087276	0.0145316	0.0741411	0.111648	0.0654687	0.126812
GRL	0.101891	0.0991332	0.0165678	0.0849189	0.121463	0.0643202	0.161467
OMN	0.0974379	0.0957433	0.0119923	0.0837762	0.114615	0.0701807	0.130297
ESP	0.127469	0.125989	0.0166072	0.109419	0.14867	0.095541	0.185159
TJK	0.0888639	0.0870681	0.0148658	0.0725166	0.109132	0.0606928	0.126481
YEM	0.116433	0.114967	0.0183273	0.0971532	0.13993	0.07976	0.18176
THA	0.0654342	0.063599	0.0106743	0.052727	0.0784844	0.0435061	0.103666
UZB	0.0821599	0.0811111	0.0114328	0.0693277	0.0979406	0.0609075	0.117317
DZA	0.0679595	0.0662681	0.0110603	0.0541877	0.0850769	0.0486161	0.099462
FRA	0.13557	0.133289	0.0182121	0.114871	0.162284	0.0992355	0.183674
CRI	0.0970294	0.0948009	0.0137235	0.0812131	0.115062	0.0723162	0.133607
AUT	0.106947	0.10433	0.0123515	0.0914904	0.124307	0.0842539	0.138621
GHA	0.088356	0.0846074	0.0157121	0.0705585	0.110083	0.0574601	0.130169
MEX	0.0633057	0.062963	0.0087072	0.0519888	0.0753875	0.0467582	0.0850918
HTI	0.0997662	0.0974442	0.0175757	0.0772726	0.125723	0.0682554	0.160536
JPN	0.15434	0.152905	0.0178769	0.135566	0.177298	0.111108	0.199758
NPL	0.0881307	0.0870389	0.0106754	0.0760782	0.101061	0.0636668	0.124906
BGR	0.107829	0.106193	0.0150883	0.0905464	0.125403	0.075979	0.162787
DNK	0.133439	0.131358	0.0166844	0.114123	0.154119	0.100981	0.181387
MMR	0.100513	0.0976903	0.0167884	0.0830517	0.121787	0.0614676	0.153407
SWZ	0.0690728	0.0677401	0.0119813	0.0547885	0.0817122	0.0478538	0.114955
CYP	0.114955	0.112014	0.0155805	0.0976528	0.134973	0.079375	0.164191
ROU	0.117721	0.115558	0.0150378	0.100254	0.138948	0.0874419	0.160264
DOM	0.094261	0.0929233	0.0126095	0.0785802	0.113734	0.0721493	0.132322
BRA	0.0664945	0.0656776	0.0102658	0.053047	0.0805637	0.044748	0.0915982
ITA	0.0986007	0.0969334	0.0135044	0.0851067	0.11541	0.071495	0.145022
SYR	0.110314	0.110477	0.0209983	0.0849193	0.136191	0.0688812	0.165951
CHL	0.0653837	0.0643842	0.0098556	0.0547926	0.0792453	0.0472623	0.0927775
BEL	0.118906	0.117588	0.0162776	0.0999753	0.141205	0.0833672	0.161673
EST	0.10256	0.101018	0.0132077	0.087036	0.119183	0.0801571	0.151779
LBN	0.123948	0.121963	0.0230657	0.0976262	0.158526	0.091166	0.196161
GIN	0.0806343	0.0791028	0.0146494	0.0607085	0.10068	0.0549141	0.118032
BRN	0.0885529	0.0858827	0.0126091	0.074706	0.10746	0.0617384	0.126489
MNG	0.0886373	0.0887575	0.0129913	0.0733986	0.102664	0.0578689	0.13346
PRY	0.0703058	0.0693558	0.0101534	0.0596042	0.0834061	0.0527607	0.101522
USA	0.0947786	0.093205	0.0122261	0.0797712	0.110801	0.0670844	0.13018
RWA	0.071885	0.0698154	0.0124252	0.0579938	0.0900133	0.0499833	0.104462
PRK	0.109529	0.106361	0.0191446	0.0885598	0.136024	0.0738323	0.181528
NGA	0.0778779	0.0757474	0.0145876	0.0602469	0.0996393	0.054309	0.115161
BWA	0.0626631	0.0611378	0.00890781	0.052315	0.0747281	0.0470197	0.0844331
NOR	0.114992	0.110953	0.0185244	0.0962185	0.141847	0.0685385	0.171566
BIH	0.105937	0.102843	0.0178708	0.0854203	0.129821	0.0732676	0.163536
BOL	0.0936902	0.0924337	0.0171162	0.0721926	0.117969	0.0599523	0.150545
AZE	0.0932269	0.0915479	0.0123366	0.0785555	0.108026	0.0740942	0.140021
BLR	0.1261	0.126642	0.0225558	0.0942857	0.159961	0.0834518	0.182723
KOR	0.0950171	0.093652	0.0132983	0.078865	0.112934	0.0736361	0.139552
RUS	0.0873632	0.0846451	0.0130754	0.0724872	0.105712	0.0592954	0.119661
PER	0.066297	0.0652702	0.00883697	0.0555254	0.0781813	0.0477878	0.0917063
VNM	0.0823114	0.0828355	0.011817	0.066603	0.0975085	0.0581978	0.117608
PSE	0.12226	0.12012	0.0220792	0.0964896	0.146043	0.0824567	0.195567
TUN	0.0819133	0.08252	0.0127266	0.0664849	0.0978708	0.0571792	0.111903
NLD	0.112926	0.110341	0.0159393	0.0942484	0.134691	0.0836799	0.159403
GTM	0.0954175	0.0936882	0.0132126	0.0800304	0.113911	0.0705025	0.135023
URY	0.0642334	0.0634175	0.00900887	0.0526776	0.0776503	0.0479259	0.0890628
HRV	0.110893	0.108886	0.0150372	0.0940231	0.133837	0.081036	0.150532
IDN	0.0837904	0.0822548	0.0114433	0.0713643	0.100634	0.0632349	0.120781
LAO	0.099899	0.0963863	0.0181839	0.0796737	0.128211	0.0692949	0.157388
GUY	0.0695941	0.0685772	0.0101868	0.0569484	0.0817042	0.048258	0.0982379
SLB	0.0948202	0.0950424	0.0148622	0.0776563	0.114425	0.0635237	0.134922
ISL	0.123353	0.123953	0.0179349	0.100449	0.148979	0.0916817	0.170995
MOZ	0.0783111	0.0750267	0.0147451	0.060998	0.0986697	0.0472626	0.126743
MLI	0.0760797	0.0740519	0.0140679	0.0591564	0.096173	0.0479076	0.118788
PHL	0.0787332	0.07779	0.0119	0.0634669	0.0969861	0.0540866	0.110138
CAN	0.111572	0.110888	0.0148193	0.0935003	0.130917	0.0841975	0.149023
CMR	0.0797658	0.0776722	0.0137616	0.0636083	0.101163	0.0541277	0.11807
FJI	0.0950137	0.0941253	0.0133985	0.0783166	0.114424	0.0672246	0.129544
CIV	0.0715095	0.0713949	0.0113214	0.0592996	0.0842081	0.0478516	0.119598
TUR	0.109697	0.106917	0.0171919	0.0888182	0.133422	0.0815406	0.161427
LBR	0.0818722	0.0808195	0.0137027	0.0638139	0.0992707	0.0562427	0.1208
BEN	0.0720175	0.0716297	0.0102996	0.0590704	0.0841644	0.050091	0.0985797

## Sheet: Stats_AE
	mean	median	std	p10	p90	min	max
CHE	0.0964431	0.091862	0.0289707	0.0627513	0.135149	0.051684	0.211326
SLV	0.0965788	0.0943157	0.0244961	0.066752	0.128667	0.0479305	0.160192
ARG	0.103346	0.0975246	0.0302221	0.0747272	0.136701	0.05902	0.21938
PAN	0.0903058	0.0875967	0.025101	0.0616844	0.124794	0.0505349	0.180768
UKR	0.105409	0.102665	0.0269872	0.0768611	0.137702	0.0574339	0.227945
GEO	0.085029	0.0824222	0.0251256	0.0586361	0.112439	0.0378351	0.203543
CUB	0.107415	0.105198	0.0262331	0.0778901	0.14239	0.0636878	0.191705
ECU	0.116662	0.113079	0.0323455	0.0778767	0.166546	0.0488932	0.20236
DEU	0.0700167	0.0698562	0.0153319	0.0516872	0.0880674	0.0394188	0.116998
BFA	0.0834492	0.0816557	0.0233367	0.0520018	0.112472	0.0387621	0.164734
MDG	0.0783644	0.0744605	0.0205251	0.0563419	0.109334	0.0460869	0.147945
KGZ	0.0900138	0.0859153	0.0251572	0.0606348	0.123288	0.0494829	0.181356
IRQ	0.0825519	0.0777068	0.0254197	0.0584895	0.115555	0.0375107	0.211236
SOM	0.0711864	0.0697395	0.0163482	0.051331	0.0938785	0.0417033	0.124965
NAM	0.0725174	0.0686302	0.0203858	0.0505663	0.101301	0.0403747	0.145109
ARE	0.061751	0.0610961	0.0143185	0.0458127	0.0793796	0.0323701	0.0981915
HUN	0.0807127	0.0813991	0.0200386	0.056841	0.103049	0.0369258	0.14065
SEN	0.0757741	0.073007	0.0227295	0.0505693	0.108596	0.0399236	0.15773
LBY	0.0538603	0.0530326	0.0137107	0.0378814	0.0709368	0.0265199	0.0994126
SDN	0.0816319	0.0775931	0.0200716	0.0577131	0.111049	0.0462148	0.125675
MYS	0.104453	0.100447	0.0277705	0.0747091	0.139006	0.0492675	0.204401
SUR	0.100057	0.0972497	0.0256642	0.0718965	0.136527	0.0524992	0.175955
BLZ	0.102852	0.100672	0.0276593	0.0687071	0.13919	0.0492571	0.186498
SVN	0.101744	0.0981388	0.0261234	0.0716696	0.133587	0.0461868	0.180658
CZE	0.0778181	0.0740393	0.0238905	0.053326	0.107506	0.0422294	0.188178
IRN	0.0877669	0.0847126	0.0258592	0.0596317	0.118034	0.045069	0.219552
SLE	0.101471	0.100599	0.0259621	0.0713067	0.128534	0.0480938	0.193879
JOR	0.0676136	0.0675691	0.015993	0.0475557	0.0880752	0.0340717	0.104713
LTU	0.0709186	0.0652226	0.0229161	0.0495205	0.0999101	0.0364334	0.172826
SWE	0.0736903	0.0695638	0.0224697	0.0484607	0.106606	0.0367287	0.147021
POL	0.0741262	0.0695101	0.0236473	0.0504237	0.106813	0.0339875	0.152852
TZA	0.092527	0.0852473	0.0285982	0.0606643	0.132476	0.0503381	0.191421
VEN	0.143618	0.140908	0.0353825	0.0947088	0.19142	0.0587248	0.236917
KEN	0.0861718	0.0816817	0.019529	0.0626646	0.110493	0.0454374	0.157672
SVK	0.0850676	0.0808152	0.0252027	0.0586178	0.117337	0.0422882	0.186905
GBR	0.0693859	0.06449	0.0205942	0.0458401	0.0999643	0.0332247	0.12583
MAR	0.0594538	0.0564927	0.0184489	0.042644	0.0844316	0.030429	0.141853
AGO	0.0943744	0.0889248	0.0243423	0.0660642	0.125803	0.0526789	0.173511
KWT	0.0523997	0.0496324	0.0140526	0.0375305	0.066393	0.0280707	0.107857
UGA	0.0978482	0.0941623	0.0278163	0.0648511	0.133876	0.0457946	0.19985
KHM	0.0950302	0.0914008	0.0295815	0.0641027	0.130295	0.0531564	0.214434
COD	0.0981161	0.0954447	0.0314448	0.0655097	0.132918	0.0489386	0.306699
QAT	0.0554795	0.054793	0.0148573	0.0376459	0.0712542	0.0305541	0.113887
BGD	0.0987918	0.095301	0.0285019	0.0630902	0.137055	0.0473897	0.186176
GRC	0.0918985	0.084838	0.0270274	0.0615714	0.133099	0.0436199	0.158532
IND	0.090083	0.085044	0.0270525	0.0605849	0.126735	0.0468272	0.183686
MDA	0.0801531	0.0763957	0.0216152	0.0580613	0.112651	0.0467448	0.146451
GAB	0.107332	0.104668	0.026601	0.0728671	0.148718	0.0504571	0.159442
MWI	0.0882809	0.0840808	0.0229691	0.0646851	0.114929	0.0344625	0.1779
EGY	0.0725273	0.0705612	0.0163263	0.052401	0.0963005	0.0387941	0.138906
MNE	0.104965	0.0970148	0.0364831	0.0668609	0.151374	0.0536938	0.216444
ZAF	0.07238	0.0687589	0.0201031	0.0499952	0.101568	0.0341982	0.129214
MKD	0.101283	0.0918161	0.037449	0.0636076	0.141202	0.0487792	0.26729
BHS	0.0772252	0.073325	0.0193442	0.0553518	0.109914	0.0423115	0.123815
ZWE	0.0903504	0.0885348	0.0258395	0.0576584	0.124724	0.048576	0.155656
IRL	0.067554	0.062837	0.0185798	0.0491194	0.0889679	0.0387627	0.154867
LKA	0.0992177	0.0956646	0.0237299	0.073571	0.13004	0.0527907	0.170669
SRB	0.0947022	0.0913682	0.0261209	0.0640752	0.128211	0.0518717	0.187139
COG	0.104189	0.0996636	0.0362784	0.0664096	0.133053	0.0590692	0.269291
NZL	0.0664636	0.0638354	0.0178419	0.0479183	0.0854298	0.037364	0.151638
LVA	0.0773299	0.0755552	0.0224014	0.0510252	0.10544	0.0359443	0.160481
AUS	0.0628352	0.0621492	0.0146391	0.0479018	0.0806917	0.0336245	0.117924
FLK	0.151691	0.140052	0.0470518	0.101884	0.214327	0.0841077	0.287117
ISR	0.0662544	0.0608843	0.0209958	0.0463607	0.0897156	0.0383159	0.133795
COL	0.0804273	0.0767369	0.0236465	0.0549391	0.110878	0.0374898	0.158357
FIN	0.128389	0.127049	0.0436139	0.0784973	0.178171	0.0558168	0.289491
GMB	0.0755266	0.0701045	0.0227146	0.0532058	0.106255	0.0313007	0.16283
PRT	0.0756119	0.0727447	0.0204745	0.0518976	0.101311	0.0413522	0.158632
SAU	0.0638258	0.0628279	0.0164774	0.0435632	0.0861922	0.0341641	0.124664
PNG	0.0955709	0.0909814	0.0238219	0.0678638	0.127847	0.0493103	0.152833
JAM	0.0854061	0.0806669	0.0246981	0.0597692	0.113683	0.0426591	0.170826
PAK	0.10159	0.093773	0.0270919	0.0728727	0.142102	0.050522	0.18948
ZMB	0.0942762	0.0909194	0.0241897	0.0652588	0.121223	0.0495144	0.168882
CHN	0.0617259	0.056074	0.0214832	0.0384599	0.0845671	0.0320191	0.137526
KAZ	0.0686263	0.0664735	0.0185511	0.0471288	0.0934611	0.0319096	0.126576
ARM	0.0910412	0.0896729	0.023827	0.0628724	0.121256	0.0367596	0.162887
LUX	0.0737676	0.0709265	0.0232814	0.0476042	0.107729	0.0365645	0.141594
ALB	0.0980955	0.0908965	0.0314351	0.0648792	0.136569	0.0540241	0.218953
HND	0.0902803	0.0859317	0.0223828	0.0640004	0.116808	0.0496202	0.155047
NIC	0.0908276	0.0862155	0.0250481	0.0645104	0.126593	0.0434953	0.18042
NER	0.0715261	0.0691046	0.0156178	0.0512885	0.0935615	0.0451632	0.109386
ETH	0.0996225	0.0941484	0.0271109	0.0711215	0.139094	0.0508539	0.170751
GRL	0.1318	0.124828	0.03991	0.0875303	0.188374	0.0611022	0.281176
OMN	0.0629227	0.0596216	0.0124139	0.0498915	0.0777392	0.0381716	0.10339
ESP	0.0741702	0.073907	0.0191778	0.0500073	0.102813	0.0437026	0.143587
TJK	0.0854411	0.0821736	0.0246361	0.0580008	0.12237	0.0444843	0.179486
YEM	0.116439	0.111629	0.0320485	0.0788854	0.153429	0.0650183	0.244941
THA	0.0845855	0.0776811	0.0272564	0.05331	0.122641	0.0450581	0.18491
UZB	0.0679366	0.0668576	0.0167598	0.0485389	0.0862083	0.0364711	0.130775
DZA	0.076405	0.0736878	0.0207127	0.0512585	0.0999854	0.0463482	0.144669
FRA	0.0704581	0.0680742	0.0172807	0.0488774	0.0914724	0.0324752	0.120904
CRI	0.0978797	0.0924796	0.0282629	0.0626283	0.129395	0.0505455	0.216029
AUT	0.0742125	0.0723068	0.0227226	0.0446478	0.102492	0.0343549	0.152562
GHA	0.104852	0.100773	0.0252142	0.0758225	0.134776	0.0572895	0.20191
MEX	0.0798306	0.0747817	0.0227264	0.0556079	0.11541	0.0413315	0.153274
HTI	0.0954358	0.0944985	0.0271984	0.0646773	0.124639	0.0395612	0.172421
JPN	0.117298	0.112455	0.0362791	0.0772315	0.157715	0.0552493	0.242665
NPL	0.0897991	0.0867198	0.0255912	0.0609544	0.117214	0.0428382	0.166081
BGR	0.0891291	0.0884511	0.0216254	0.0619757	0.115477	0.0398905	0.150381
DNK	0.0611565	0.0617555	0.0152894	0.0422719	0.0803241	0.03238	0.107386
MMR	0.109298	0.102562	0.0351812	0.0746853	0.149562	0.0509687	0.248293
SWZ	0.0814572	0.0789749	0.0221361	0.0556163	0.114882	0.0397273	0.152564
CYP	0.100241	0.0944552	0.0315269	0.0633701	0.140225	0.0472857	0.204446
ROU	0.0904845	0.0881943	0.0245918	0.0632031	0.11729	0.0433863	0.191068
DOM	0.0895245	0.0834832	0.0281473	0.0604705	0.124792	0.040782	0.209382
BRA	0.07747	0.0736371	0.022147	0.0525077	0.103468	0.0407059	0.151287
ITA	0.0877609	0.0821774	0.0249682	0.060939	0.119932	0.0429855	0.181108
SYR	0.0860995	0.0852971	0.0212271	0.0589023	0.115602	0.0452643	0.137475
CHL	0.058613	0.0585721	0.0147326	0.0416575	0.07641	0.0309079	0.111319
BEL	0.072331	0.0672278	0.0179915	0.0521705	0.0981912	0.0404852	0.121267
EST	0.0714104	0.0676574	0.0194925	0.0509969	0.100479	0.0388237	0.129651
LBN	0.140335	0.13423	0.0374456	0.0962772	0.191754	0.0845682	0.254692
GIN	0.103707	0.0989399	0.0296763	0.0713413	0.139183	0.0581913	0.213754
BRN	0.0894557	0.0845127	0.0258479	0.0619148	0.12664	0.0446701	0.175775
MNG	0.0722584	0.0715761	0.0174164	0.0510417	0.0964203	0.0424752	0.122967
PRY	0.0696162	0.0675336	0.0201763	0.0455453	0.0949523	0.0324651	0.133152
USA	0.0612476	0.0594106	0.0183004	0.0387605	0.0853257	0.029703	0.121011
RWA	0.0930277	0.0899337	0.0257665	0.0660683	0.126577	0.0458139	0.181089
PRK	0.093411	0.0926996	0.0227959	0.0663092	0.121178	0.0484338	0.17997
NGA	0.0929609	0.0894555	0.0264559	0.0630296	0.120171	0.0492208	0.173463
BWA	0.0671326	0.0631522	0.0213813	0.0435458	0.097341	0.0318934	0.129606
NOR	0.0863008	0.0851177	0.0207683	0.0606955	0.112571	0.0402584	0.139166
BIH	0.125264	0.117545	0.0371537	0.0835836	0.178903	0.0600694	0.263569
BOL	0.107045	0.100262	0.0306234	0.0705366	0.154282	0.0504619	0.187442
AZE	0.0976528	0.0972083	0.0282312	0.0616927	0.134675	0.0423179	0.180621
BLR	0.119924	0.118817	0.0302608	0.0852674	0.15359	0.0472846	0.212723
KOR	0.0796456	0.076195	0.0220436	0.0542397	0.102206	0.0434408	0.148096
RUS	0.080192	0.0745741	0.0266107	0.0510551	0.107098	0.0290022	0.194446
PER	0.0870766	0.083804	0.0264861	0.0557468	0.120297	0.0409912	0.181019
VNM	0.0793574	0.0761595	0.0203769	0.0560547	0.108727	0.0474511	0.165457
PSE	0.0960535	0.0916509	0.0219385	0.0714109	0.127575	0.0552894	0.167498
TUN	0.0801597	0.074842	0.0217333	0.0577009	0.113617	0.0448992	0.142221
NLD	0.0644481	0.0617504	0.01539	0.0456568	0.087744	0.0309363	0.109969
GTM	0.0943658	0.0907777	0.0250453	0.0638639	0.12551	0.052696	0.185089
URY	0.0609234	0.0591172	0.0180522	0.0416585	0.0830685	0.0306009	0.130368
HRV	0.0911647	0.0876051	0.0262228	0.0627141	0.129037	0.0464278	0.187845
IDN	0.0863793	0.0831956	0.0276324	0.0547382	0.123575	0.0449333	0.15691
LAO	0.0967369	0.0907924	0.0237742	0.0693474	0.132191	0.056551	0.162504
GUY	0.0881138	0.086	0.0248898	0.0601779	0.123451	0.0359774	0.166098
SLB	0.0978571	0.0935586	0.0276922	0.0671902	0.12665	0.051048	0.205956
ISL	0.145282	0.144872	0.0422033	0.0964832	0.187418	0.0639733	0.291088
MOZ	0.0936622	0.0902349	0.0247179	0.0637965	0.128376	0.042936	0.193299
MLI	0.07216	0.0698305	0.0165648	0.0519584	0.0951435	0.0405207	0.116959
PHL	0.0845291	0.0821032	0.0227883	0.0568407	0.113863	0.0398137	0.158282
CAN	0.0654213	0.0634002	0.0141738	0.048746	0.0847204	0.0414162	0.103893
CMR	0.0988464	0.0893261	0.0357666	0.0635675	0.155698	0.0444124	0.239843
FJI	0.0818166	0.0785438	0.0224639	0.0593413	0.10639	0.0448457	0.174213
CIV	0.0958908	0.0884564	0.0287891	0.0647641	0.13672	0.051708	0.204313
TUR	0.105613	0.0966416	0.0327247	0.0719268	0.151428	0.0535082	0.200565
LBR	0.106459	0.102739	0.0304213	0.06965	0.152418	0.0492125	0.187694
BEN	0.0891315	0.0855764	0.0229318	0.0604461	0.124705	0.045074	0.142946

## Sheet: Stats_ATR_CCS
	mean	median	std	p10	p90	min	max
CHE	0.0854074	0.0813467	0.016646	0.0670221	0.108351	0.0502659	0.137107
SLV	0.0656737	0.0661735	0.016245	0.0448648	0.0850145	0.0334848	0.114228
ARG	0.0723916	0.0686794	0.0172564	0.0525483	0.0939416	0.040349	0.136119
PAN	0.0607267	0.0605242	0.0137482	0.0442321	0.0764415	0.0343229	0.106739
UKR	0.0758979	0.073271	0.0177814	0.0571914	0.0956673	0.04399	0.155706
GEO	0.0514941	0.048822	0.0131895	0.0352867	0.0679702	0.026687	0.0910695
CUB	0.0752943	0.0714783	0.0175625	0.0546578	0.099465	0.0473938	0.133006
ECU	0.0747704	0.0735832	0.0158835	0.0566364	0.0912139	0.0445655	0.139757
DEU	0.0920021	0.0868009	0.0220393	0.0671791	0.119081	0.0543036	0.178668
BFA	0.0597719	0.0591902	0.0134489	0.0422066	0.0768654	0.034679	0.0989644
MDG	0.0566656	0.0522646	0.0174535	0.0393203	0.0791728	0.0276441	0.136947
KGZ	0.057576	0.0557311	0.0141841	0.0413976	0.0743216	0.0347257	0.125983
IRQ	0.0631894	0.0628794	0.0134407	0.0458528	0.0805868	0.0390756	0.103192
SOM	0.0679989	0.0655976	0.0166151	0.0505657	0.0885361	0.0343266	0.129631
NAM	0.0605113	0.0589788	0.0138191	0.0448685	0.0789574	0.0344124	0.108774
ARE	0.0559991	0.0563155	0.0118526	0.0407727	0.0739049	0.0305853	0.0855061
HUN	0.0787536	0.0769322	0.0214659	0.0553209	0.104112	0.0452543	0.162179
SEN	0.0532914	0.0522109	0.0140841	0.0383506	0.0700091	0.0285854	0.117605
LBY	0.0510381	0.049233	0.013583	0.0361523	0.0678074	0.0279163	0.101932
SDN	0.0752124	0.0747093	0.0198584	0.0526596	0.0989173	0.0343114	0.160196
MYS	0.0602197	0.0572594	0.0146126	0.0445563	0.0775928	0.0363819	0.116777
SUR	0.0618853	0.0574458	0.0173027	0.0442005	0.0845384	0.0301573	0.123197
BLZ	0.067446	0.0679325	0.0145866	0.0483433	0.0858829	0.0352196	0.107944
SVN	0.0877332	0.0833204	0.0249949	0.062911	0.115949	0.0456212	0.204661
CZE	0.0761687	0.0701071	0.0200007	0.0557997	0.106584	0.0405794	0.154195
IRN	0.0601986	0.0569464	0.0150445	0.0436644	0.0773463	0.0379146	0.126999
SLE	0.0620345	0.0584618	0.0167696	0.0457747	0.0843718	0.0300361	0.128559
JOR	0.058009	0.055633	0.01643	0.0405697	0.079701	0.0302713	0.136776
LTU	0.0766988	0.0745767	0.0169456	0.056596	0.0983848	0.0443046	0.128867
SWE	0.0678775	0.0647435	0.0189748	0.0460803	0.0930099	0.0385737	0.146617
POL	0.0835567	0.0787845	0.0212758	0.0620035	0.106767	0.0456175	0.160975
TZA	0.0561266	0.0542186	0.0147891	0.0407916	0.0735634	0.0276756	0.108868
VEN	0.0886009	0.0860625	0.021064	0.0624223	0.113326	0.0495377	0.157459
KEN	0.0605956	0.061423	0.0109517	0.0466476	0.0743248	0.0362015	0.0881586
SVK	0.0787847	0.0747514	0.0214605	0.0552769	0.106497	0.0390586	0.165145
GBR	0.0721181	0.072075	0.0151718	0.0506108	0.0916589	0.0431373	0.111038
MAR	0.0549581	0.0526998	0.0139567	0.0391825	0.0765059	0.0315555	0.0962037
AGO	0.0587048	0.0567936	0.0165751	0.0422416	0.0787027	0.0297818	0.115297
KWT	0.0495639	0.0480452	0.0130573	0.0351344	0.0664388	0.0284592	0.0883612
UGA	0.0566418	0.0538659	0.0128464	0.0423777	0.0743058	0.0337198	0.0956648
KHM	0.0546273	0.0525046	0.014917	0.0395126	0.0678015	0.0347968	0.128359
COD	0.0589232	0.0587132	0.0145564	0.0412861	0.0745599	0.0347344	0.114737
QAT	0.0501776	0.0476299	0.0127124	0.0359183	0.0653903	0.0251883	0.0888649
BGD	0.0587343	0.0558857	0.0142718	0.0430944	0.0758896	0.030157	0.105129
GRC	0.0846028	0.0791962	0.0210757	0.0607087	0.112961	0.047231	0.180148
IND	0.049776	0.0493558	0.0122126	0.0344095	0.0650104	0.0225939	0.093595
MDA	0.0653508	0.0611293	0.0161857	0.0480425	0.0889627	0.0373849	0.126354
GAB	0.0680542	0.0661453	0.0158594	0.0498776	0.089139	0.0401371	0.125534
MWI	0.0613932	0.0566248	0.0168271	0.0432554	0.0851455	0.0343079	0.115911
EGY	0.0633437	0.063242	0.0132506	0.0474064	0.079047	0.0382224	0.0951422
MNE	0.0688622	0.0670367	0.0165126	0.050296	0.0892248	0.0378027	0.109729
ZAF	0.0531109	0.0521354	0.0120987	0.0387641	0.0693464	0.0318635	0.091669
MKD	0.0618034	0.0602672	0.0136371	0.0462818	0.0812373	0.0364944	0.104838
BHS	0.0618376	0.0598919	0.0136419	0.0461694	0.0808367	0.0344835	0.108851
ZWE	0.0639943	0.0606722	0.0160069	0.0483598	0.0818336	0.0323689	0.11661
IRL	0.0889082	0.0832574	0.0245488	0.0656266	0.119752	0.0523254	0.202896
LKA	0.0684162	0.0643163	0.0186402	0.0460876	0.0924376	0.030463	0.131461
SRB	0.0650395	0.0608805	0.016686	0.0465465	0.0840535	0.0332494	0.124754
COG	0.0683983	0.0693527	0.0157124	0.049153	0.088604	0.0384183	0.122241
NZL	0.0720406	0.0696662	0.0172836	0.0527184	0.0933296	0.0383916	0.139921
LVA	0.0753831	0.0705129	0.0201896	0.0544896	0.0992915	0.048173	0.15775
AUS	0.0711393	0.0693098	0.017992	0.0509063	0.0931633	0.0389242	0.146036
FLK	0.0682643	0.0669984	0.0170726	0.048691	0.0859354	0.0400063	0.128659
ISR	0.0631309	0.0610805	0.0139563	0.0466884	0.0824693	0.033539	0.0974848
COL	0.0557591	0.0540297	0.0121538	0.0413047	0.0729079	0.0337465	0.095915
FIN	0.0925867	0.0871538	0.0277706	0.0606021	0.129849	0.044582	0.201108
GMB	0.0499994	0.0491114	0.0112255	0.0384244	0.0632447	0.0254195	0.0991266
PRT	0.0800943	0.074471	0.0230602	0.0599911	0.106305	0.0461049	0.175161
SAU	0.0673661	0.0644558	0.0162131	0.0507105	0.087655	0.0389121	0.118185
PNG	0.058536	0.0571436	0.014133	0.042721	0.0746315	0.033499	0.103463
JAM	0.0588549	0.0571987	0.0132418	0.0433889	0.0781401	0.0342574	0.0966169
PAK	0.0644965	0.0602212	0.0167935	0.0473261	0.0891401	0.0425008	0.112316
ZMB	0.0616254	0.0584054	0.0161162	0.0435839	0.0841869	0.036851	0.136478
CHN	0.071268	0.0664148	0.020636	0.0510275	0.0940234	0.0414647	0.156444
KAZ	0.0526278	0.0493293	0.0148488	0.0379734	0.0701355	0.030793	0.101291
ARM	0.0558775	0.0541181	0.0135347	0.0414018	0.0707965	0.0270072	0.0992068
LUX	0.0918998	0.0887307	0.0253743	0.0624461	0.126505	0.0481025	0.179104
ALB	0.0587925	0.0562322	0.0130849	0.0448638	0.0786168	0.0370577	0.108067
HND	0.0624173	0.0590245	0.0160681	0.0472055	0.0773612	0.0351043	0.144534
NIC	0.0610185	0.0600639	0.0168082	0.0446587	0.07961	0.0342609	0.16059
NER	0.0591316	0.0577218	0.0145366	0.0428084	0.0783762	0.0350995	0.100976
ETH	0.072366	0.0720945	0.0175652	0.0505352	0.0911438	0.0358746	0.144529
GRL	0.0621322	0.0596033	0.0154981	0.0459762	0.0811819	0.0323396	0.12732
OMN	0.0670775	0.0659904	0.0159793	0.0504212	0.0851644	0.0392526	0.16112
ESP	0.0850783	0.0817096	0.0218137	0.0598769	0.11277	0.0461815	0.169155
TJK	0.0557943	0.0525269	0.012504	0.0413315	0.072628	0.028179	0.0905315
YEM	0.0764852	0.0753134	0.0178139	0.0555767	0.100202	0.0487869	0.131547
THA	0.0588861	0.0573574	0.0147462	0.0433062	0.0783828	0.0318604	0.104366
UZB	0.054461	0.0527669	0.0142555	0.0389036	0.0753144	0.0317756	0.101469
DZA	0.0548314	0.0542184	0.0131543	0.0403178	0.0715716	0.0317758	0.101732
FRA	0.0844105	0.081678	0.0194619	0.0624062	0.108559	0.0481846	0.140025
CRI	0.0623545	0.0611421	0.0141831	0.0481968	0.0797492	0.0340263	0.113642
AUT	0.0679717	0.0664359	0.0185535	0.047335	0.0930436	0.034514	0.120798
GHA	0.0631723	0.0597252	0.0161077	0.0472149	0.0826144	0.0342389	0.129588
MEX	0.0539683	0.051378	0.013169	0.0405539	0.0711277	0.0285711	0.0994286
HTI	0.0680857	0.0666505	0.0156941	0.0483578	0.0880647	0.0370981	0.123085
JPN	0.0871702	0.0830009	0.0204019	0.0637905	0.118706	0.0503807	0.141341
NPL	0.056965	0.054874	0.013619	0.0411805	0.0758452	0.0311431	0.103816
BGR	0.0795989	0.0740954	0.0222797	0.0559895	0.110547	0.0379137	0.164277
DNK	0.0844883	0.0808225	0.0227493	0.0587193	0.111823	0.0475499	0.175874
MMR	0.0643885	0.0621753	0.0153319	0.0469365	0.0853365	0.0386713	0.119393
SWZ	0.0546896	0.0511184	0.013687	0.0385138	0.0718236	0.0326839	0.0958371
CYP	0.0817136	0.0781678	0.0203508	0.0595731	0.110938	0.0421497	0.139816
ROU	0.084782	0.0811945	0.0226514	0.0606859	0.114441	0.0404588	0.180367
DOM	0.0608549	0.059157	0.0160109	0.0400886	0.0792395	0.026537	0.123556
BRA	0.0545889	0.0524603	0.0139513	0.0403834	0.0699371	0.0312155	0.138088
ITA	0.0830305	0.0776578	0.0232578	0.0560966	0.117684	0.0412731	0.160461
SYR	0.0754055	0.0749761	0.0174486	0.0515562	0.0981741	0.0418376	0.115186
CHL	0.0536811	0.0516619	0.0122076	0.0384098	0.0712334	0.0297171	0.0851861
BEL	0.0907265	0.0857712	0.0231612	0.0666231	0.12199	0.0550685	0.184499
EST	0.0759911	0.0711165	0.0214389	0.0528269	0.100762	0.0365324	0.152822
LBN	0.0823817	0.0802801	0.0204247	0.0590196	0.107346	0.0406431	0.144989
GIN	0.0623315	0.059333	0.0153953	0.0467699	0.0824896	0.0326564	0.109676
BRN	0.0579685	0.0572263	0.0140812	0.0388718	0.07656	0.0289877	0.0901222
MNG	0.0591586	0.0585055	0.0132591	0.0444403	0.0753855	0.0330612	0.111121
PRY	0.0593168	0.0569231	0.0137462	0.0435351	0.0779694	0.0379734	0.106389
USA	0.0517926	0.0489968	0.0113326	0.0404644	0.0653804	0.0278991	0.0914775
RWA	0.0546138	0.0534935	0.0119074	0.041962	0.0691459	0.0297139	0.0899717
PRK	0.0755887	0.0736518	0.0183136	0.0556654	0.0982623	0.0474778	0.135564
NGA	0.0612466	0.0599681	0.0168861	0.0420502	0.0838867	0.0324873	0.111348
BWA	0.0477759	0.0448664	0.0124107	0.0354014	0.0638873	0.0264766	0.102721
NOR	0.0816404	0.0796906	0.0154214	0.0623043	0.102318	0.0525293	0.130246
BIH	0.0682976	0.0675221	0.0124703	0.0530231	0.08618	0.0445046	0.108484
BOL	0.0751672	0.0744725	0.0146806	0.0557527	0.0929948	0.0408972	0.118738
AZE	0.0617533	0.057854	0.0147337	0.0465514	0.0852849	0.0403966	0.118403
BLR	0.0883042	0.0860867	0.0208639	0.0634155	0.117272	0.0492952	0.166994
KOR	0.0689475	0.0658095	0.0169548	0.0505046	0.0902081	0.043577	0.156647
RUS	0.0360523	0.0356047	0.00708389	0.0261439	0.0451946	0.0206748	0.0519773
PER	0.0515032	0.0510314	0.0111781	0.0375536	0.0634085	0.0304127	0.0908042
VNM	0.0615508	0.0583581	0.0148828	0.0445919	0.0805506	0.0344466	0.104696
PSE	0.0851494	0.0832457	0.021215	0.0606049	0.114426	0.0476942	0.14524
TUN	0.0657292	0.0642071	0.0163753	0.0459511	0.0880894	0.0384338	0.119121
NLD	0.0872835	0.0817676	0.0227626	0.062801	0.11613	0.0495561	0.171471
GTM	0.059513	0.0556563	0.0117005	0.0474304	0.0766946	0.0346619	0.101119
URY	0.0550716	0.0526534	0.0137517	0.0383071	0.0732258	0.0288458	0.0955284
HRV	0.0778638	0.0736726	0.0201272	0.0582065	0.103529	0.0474166	0.161019
IDN	0.0597795	0.0575054	0.0170783	0.0403428	0.0822842	0.0316239	0.135482
LAO	0.06655	0.0619372	0.0172985	0.0497354	0.0869604	0.0408734	0.133693
GUY	0.0568681	0.0542058	0.0139239	0.0422781	0.0774066	0.0310334	0.0991902
SLB	0.0594514	0.056431	0.0141535	0.0434456	0.0758556	0.0359628	0.120222
ISL	0.0815244	0.0804977	0.0141197	0.0632072	0.100268	0.0606146	0.120808
MOZ	0.0653554	0.0629766	0.0167642	0.0466624	0.0901994	0.0395589	0.109087
MLI	0.0602009	0.0583027	0.01537	0.0437467	0.0804195	0.0293328	0.106499
PHL	0.0519164	0.04992	0.0126826	0.037496	0.0704371	0.0279463	0.0872478
CAN	0.0696314	0.0653457	0.017245	0.0514654	0.0955012	0.0380105	0.115738
CMR	0.0612931	0.0615155	0.01457	0.0445013	0.0807997	0.0352133	0.102231
FJI	0.0601174	0.0597893	0.013702	0.0431005	0.0749509	0.0351613	0.103983
CIV	0.0569029	0.0546448	0.0142253	0.0424704	0.0765307	0.0279512	0.104151
TUR	0.0723212	0.07153	0.0155091	0.055878	0.0904219	0.0411468	0.13467
LBR	0.0635203	0.0629575	0.0175732	0.0435018	0.0834807	0.0322422	0.121198
BEN	0.0537374	0.0508109	0.0140777	0.0378021	0.0717778	0.0314553	0.105701

## Sheet: Stats_B_PYR_kerosene
	mean	median	std	p10	p90	min	max
CHE	0.198521	0.198112	0.0377864	0.153208	0.244812	0.128528	0.353854
SLV	0.155292	0.153667	0.0266553	0.122144	0.189517	0.0976835	0.220507
ARG	0.156251	0.149087	0.0334162	0.119522	0.199563	0.099522	0.260514
PAN	0.146361	0.142738	0.0271986	0.116069	0.180386	0.0985875	0.228602
UKR	0.189764	0.188549	0.0361667	0.146248	0.234152	0.10974	0.291966
GEO	0.123206	0.11803	0.0215505	0.102582	0.153706	0.0806778	0.193658
CUB	0.185	0.180254	0.0351313	0.144772	0.231634	0.120865	0.304879
ECU	0.170395	0.169966	0.0376148	0.122827	0.215168	0.0952916	0.297902
DEU	0.168943	0.163574	0.0271702	0.138843	0.209006	0.115966	0.244479
BFA	0.125966	0.123662	0.0247827	0.098016	0.157923	0.0811599	0.20204
MDG	0.115341	0.110571	0.0248078	0.0885674	0.149592	0.0751619	0.200072
KGZ	0.142351	0.143028	0.0250549	0.112383	0.179043	0.0865677	0.223212
IRQ	0.150579	0.145358	0.0281838	0.118948	0.183843	0.10286	0.262283
SOM	0.137169	0.13523	0.025043	0.103834	0.169922	0.0834377	0.207379
NAM	0.123698	0.120808	0.0245386	0.0930245	0.157887	0.0724133	0.199244
ARE	0.125267	0.122953	0.0202503	0.101551	0.150112	0.0883938	0.181323
HUN	0.143167	0.137999	0.0263324	0.112577	0.17812	0.096489	0.234144
SEN	0.0989902	0.0973305	0.0184873	0.0785435	0.120373	0.0674533	0.156543
LBY	0.0984493	0.0965073	0.0171159	0.0799731	0.117866	0.0678134	0.178971
SDN	0.153993	0.149737	0.0327446	0.117295	0.199784	0.0831669	0.239203
MYS	0.127317	0.120645	0.0319407	0.0922304	0.171379	0.0775393	0.231024
SUR	0.132282	0.128851	0.0251068	0.103449	0.16751	0.0810262	0.208453
BLZ	0.164064	0.158224	0.0325576	0.128743	0.203823	0.113456	0.270108
SVN	0.175325	0.174343	0.0270826	0.145394	0.211571	0.119437	0.264418
CZE	0.130293	0.12684	0.0226565	0.103278	0.157803	0.0939199	0.200245
IRN	0.152553	0.147033	0.0346813	0.116244	0.193501	0.0941308	0.286153
SLE	0.142433	0.140682	0.0298565	0.108468	0.174527	0.0835309	0.24458
JOR	0.127543	0.127414	0.0207468	0.102804	0.154314	0.0883952	0.195242
LTU	0.148721	0.141639	0.0273814	0.118886	0.182411	0.102684	0.244463
SWE	0.127513	0.125769	0.0216192	0.103004	0.156354	0.0905777	0.199765
POL	0.148869	0.146578	0.0252759	0.123136	0.179382	0.100593	0.265345
TZA	0.123658	0.122151	0.022649	0.0951957	0.151975	0.0817673	0.197474
VEN	0.212531	0.2118	0.0460604	0.158203	0.269131	0.113301	0.364786
KEN	0.162179	0.157067	0.0311262	0.127132	0.204286	0.10761	0.267236
SVK	0.154585	0.14807	0.0258664	0.127436	0.192354	0.115175	0.236086
GBR	0.180539	0.177524	0.026142	0.151618	0.21924	0.123326	0.258263
MAR	0.105531	0.102634	0.0174317	0.0852501	0.133372	0.0773349	0.158783
AGO	0.13534	0.130939	0.029895	0.101533	0.178208	0.080982	0.232697
KWT	0.105719	0.106042	0.0168688	0.0862762	0.129888	0.0682478	0.150404
UGA	0.120911	0.114458	0.0285596	0.0894699	0.158341	0.0721391	0.238601
KHM	0.13548	0.132029	0.022341	0.109472	0.167057	0.0933035	0.200116
COD	0.146301	0.142666	0.031326	0.111642	0.187769	0.0919009	0.239963
QAT	0.106706	0.103671	0.0175632	0.0867407	0.136954	0.07132	0.14961
BGD	0.1466	0.143498	0.0272537	0.114265	0.182676	0.0935907	0.228293
GRC	0.170687	0.167441	0.0321068	0.13255	0.206432	0.123067	0.304446
IND	0.111904	0.110305	0.0218462	0.0894333	0.138496	0.0758299	0.23998
MDA	0.149362	0.144305	0.0274752	0.121695	0.185747	0.0912271	0.244153
GAB	0.16483	0.161989	0.0319451	0.126661	0.205244	0.0957492	0.254826
MWI	0.132109	0.127669	0.0270704	0.101529	0.169919	0.083799	0.229876
EGY	0.129666	0.126931	0.0273656	0.0969636	0.166527	0.078037	0.207002
MNE	0.168552	0.163886	0.0306497	0.133711	0.211738	0.109924	0.265481
ZAF	0.112254	0.111124	0.0186132	0.0893912	0.136176	0.0760053	0.168496
MKD	0.154495	0.152249	0.0316784	0.120524	0.181965	0.0959416	0.275692
BHS	0.140496	0.135879	0.0256171	0.11261	0.175106	0.0985479	0.243215
ZWE	0.140997	0.137763	0.0308317	0.102503	0.183959	0.0814865	0.242606
IRL	0.16806	0.167449	0.0247983	0.134216	0.204244	0.115767	0.230313
LKA	0.161213	0.160359	0.0308195	0.122697	0.207984	0.102672	0.237259
SRB	0.153639	0.147085	0.0275492	0.125016	0.190593	0.102301	0.265003
COG	0.151148	0.144784	0.0317039	0.120448	0.197584	0.0911573	0.259761
NZL	0.151957	0.145247	0.0294789	0.12139	0.188166	0.106943	0.266401
LVA	0.147815	0.144004	0.0262296	0.119507	0.17814	0.10769	0.264838
AUS	0.152068	0.151041	0.0288674	0.118642	0.191379	0.10721	0.249284
FLK	0.185022	0.177361	0.0425697	0.14452	0.232999	0.121746	0.366593
ISR	0.136713	0.136161	0.0214669	0.11198	0.166197	0.0917435	0.199099
COL	0.115446	0.113167	0.0206223	0.0914648	0.141048	0.0792618	0.191404
FIN	0.194244	0.192821	0.0380796	0.151255	0.244171	0.130714	0.364162
GMB	0.113776	0.110579	0.0230034	0.0873233	0.148039	0.0740933	0.199907
PRT	0.157409	0.154912	0.0276343	0.125493	0.192824	0.104256	0.253507
SAU	0.143571	0.141045	0.0236097	0.115991	0.176694	0.104057	0.229959
PNG	0.14075	0.137729	0.0290773	0.107413	0.183803	0.0883928	0.239046
JAM	0.13979	0.137017	0.0240963	0.113697	0.170243	0.0892678	0.227915
PAK	0.164093	0.164192	0.0311527	0.120479	0.195314	0.0989134	0.311403
ZMB	0.141027	0.138887	0.0318021	0.103109	0.179003	0.0717478	0.252508
CHN	0.0908833	0.0895935	0.0165754	0.0711446	0.114495	0.0595581	0.127307
KAZ	0.117822	0.114659	0.0194325	0.0944174	0.14521	0.0834479	0.171345
ARM	0.138662	0.132086	0.0288699	0.106268	0.172423	0.0899847	0.237074
LUX	0.173299	0.168928	0.0293565	0.140164	0.215054	0.116492	0.259027
ALB	0.146764	0.141002	0.0320158	0.11574	0.191091	0.096209	0.2748
HND	0.153912	0.148615	0.0326465	0.115703	0.196843	0.0967861	0.253933
NIC	0.124595	0.119767	0.0279102	0.094192	0.15999	0.0702075	0.219743
NER	0.128181	0.125489	0.0245184	0.0994745	0.167629	0.0859493	0.191455
ETH	0.154999	0.152152	0.0337763	0.113233	0.194193	0.0939568	0.294668
GRL	0.168833	0.163216	0.0352379	0.13139	0.210596	0.107084	0.314158
OMN	0.139093	0.135058	0.0229003	0.112653	0.168592	0.089074	0.210967
ESP	0.172637	0.16937	0.0236889	0.145585	0.207715	0.130313	0.261553
TJK	0.135596	0.135132	0.0240282	0.106953	0.171027	0.0959298	0.208529
YEM	0.189542	0.184554	0.0363559	0.143979	0.245061	0.131126	0.297886
THA	0.115247	0.111902	0.0252554	0.0879391	0.151833	0.0739538	0.223281
UZB	0.121649	0.119423	0.0221402	0.0969993	0.150876	0.0843571	0.195852
DZA	0.116366	0.115345	0.0220128	0.0903897	0.144102	0.0762509	0.20731
FRA	0.177251	0.176771	0.02392	0.146604	0.206193	0.113104	0.246426
CRI	0.156552	0.153119	0.0329548	0.121644	0.194837	0.105823	0.256819
AUT	0.141638	0.13872	0.0223508	0.113382	0.173024	0.104356	0.20723
GHA	0.150273	0.145282	0.0342113	0.118488	0.190629	0.101609	0.314027
MEX	0.1084	0.105734	0.0211061	0.0846225	0.133594	0.0690903	0.19148
HTI	0.158135	0.154072	0.0292367	0.124443	0.193077	0.0898506	0.275889
JPN	0.215272	0.211889	0.0353877	0.176056	0.25107	0.152988	0.390546
NPL	0.136327	0.131711	0.0227183	0.109331	0.167832	0.0911839	0.206439
BGR	0.15585	0.147798	0.0272705	0.124226	0.192852	0.112548	0.248562
DNK	0.171172	0.166841	0.0253875	0.14396	0.207061	0.126416	0.248397
MMR	0.168443	0.165074	0.031976	0.13233	0.20662	0.0937608	0.255115
SWZ	0.117689	0.114779	0.0272001	0.0900272	0.142684	0.0665732	0.236148
CYP	0.174653	0.171501	0.0326111	0.13616	0.215581	0.108303	0.317714
ROU	0.175236	0.172485	0.030273	0.140724	0.211668	0.114589	0.285933
DOM	0.1442	0.144058	0.022731	0.115009	0.166288	0.0986748	0.226761
BRA	0.115913	0.112411	0.0247079	0.0882495	0.145055	0.0671327	0.203873
ITA	0.147521	0.145728	0.0254293	0.116296	0.179285	0.0999466	0.218137
SYR	0.170594	0.164991	0.0343941	0.136022	0.220531	0.113276	0.273808
CHL	0.102839	0.100755	0.017349	0.0812506	0.123091	0.071876	0.165044
BEL	0.166321	0.15886	0.0271657	0.135263	0.199734	0.119161	0.255344
EST	0.147019	0.146046	0.0258352	0.118194	0.178648	0.102742	0.228961
LBN	0.219859	0.217713	0.041973	0.166061	0.268964	0.130983	0.334696
GIN	0.137712	0.133261	0.0299755	0.105316	0.177936	0.0866301	0.241847
BRN	0.135929	0.131817	0.0202459	0.113072	0.161315	0.0924047	0.201201
MNG	0.135705	0.133594	0.0235588	0.107462	0.16638	0.0905872	0.201027
PRY	0.116333	0.113213	0.0217123	0.0907759	0.146099	0.0722522	0.170597
USA	0.128929	0.126854	0.0198763	0.101336	0.156582	0.0903915	0.185537
RWA	0.121818	0.116795	0.0268467	0.0936444	0.155249	0.0759841	0.210743
PRK	0.170167	0.164462	0.032249	0.137072	0.219049	0.107317	0.269257
NGA	0.132684	0.129234	0.0270118	0.0968726	0.170197	0.075666	0.211169
BWA	0.101835	0.0980883	0.0197535	0.0807261	0.12581	0.0574878	0.169211
NOR	0.179033	0.174126	0.0367869	0.134322	0.225954	0.106043	0.288539
BIH	0.178137	0.174808	0.0352067	0.138931	0.221105	0.109774	0.293852
BOL	0.163453	0.156362	0.0340753	0.126784	0.205846	0.0924095	0.277218
AZE	0.142449	0.14131	0.0258592	0.111414	0.173499	0.086372	0.213872
BLR	0.20343	0.202277	0.0386809	0.156443	0.254703	0.12859	0.342751
KOR	0.149299	0.147055	0.028378	0.116449	0.187507	0.101926	0.245407
RUS	0.129158	0.128491	0.0187385	0.105748	0.153325	0.0811941	0.187155
PER	0.114743	0.108023	0.0247997	0.0897846	0.147067	0.0744427	0.2001
VNM	0.132064	0.130567	0.0255977	0.100906	0.164211	0.0893038	0.207907
PSE	0.191145	0.180569	0.0439246	0.148837	0.258694	0.123456	0.405609
TUN	0.13503	0.131369	0.0299984	0.0996228	0.174794	0.0872063	0.222391
NLD	0.156677	0.153037	0.0246789	0.12964	0.186145	0.112021	0.23423
GTM	0.146045	0.138402	0.029151	0.115961	0.180899	0.0916827	0.270603
URY	0.101749	0.0971647	0.0177686	0.0829124	0.129512	0.0706324	0.145894
HRV	0.16239	0.160872	0.0276172	0.130557	0.19685	0.111523	0.258988
IDN	0.132027	0.129944	0.0210445	0.105847	0.160439	0.0914983	0.184547
LAO	0.162701	0.15467	0.0321183	0.123835	0.207848	0.111721	0.245478
GUY	0.117365	0.110191	0.024339	0.0941121	0.147841	0.0764489	0.217267
SLB	0.147501	0.14147	0.0277893	0.11609	0.180029	0.0994468	0.232744
ISL	0.20916	0.206544	0.0382659	0.165673	0.260296	0.123581	0.314412
MOZ	0.143784	0.13825	0.0337313	0.1073	0.191189	0.0944034	0.248167
MLI	0.126863	0.123467	0.0258702	0.0972536	0.168501	0.0787697	0.198298
PHL	0.125614	0.119876	0.0257769	0.0990916	0.156017	0.0823594	0.22283
CAN	0.156585	0.152148	0.0260053	0.126298	0.18984	0.106347	0.239194
CMR	0.134207	0.131079	0.0233334	0.108723	0.165599	0.0842447	0.206563
FJI	0.146555	0.14209	0.0271997	0.117462	0.186806	0.102207	0.240761
CIV	0.122037	0.117465	0.0237427	0.0948729	0.153736	0.0801633	0.191628
TUR	0.175659	0.170203	0.0361644	0.132798	0.21823	0.114039	0.311992
LBR	0.145658	0.140921	0.0309524	0.107082	0.189717	0.0875725	0.22904
BEN	0.122562	0.117494	0.0246135	0.09533	0.155016	0.0701712	0.203307

## Sheet: Stats_CLR
	mean	median	std	p10	p90	min	max
CHE	0.0845584	0.0818767	0.0217242	0.0609039	0.10879	0.0498922	0.160352
SLV	0.0639796	0.0610008	0.0164751	0.0442143	0.085285	0.0308068	0.11171
ARG	0.0687458	0.0677733	0.0160242	0.0494901	0.0871115	0.0404846	0.121253
PAN	0.0587409	0.0562996	0.0146421	0.0425673	0.0782894	0.0338122	0.131388
UKR	0.074961	0.0732812	0.0199771	0.0513347	0.101021	0.0349124	0.142057
GEO	0.0531937	0.0491449	0.0159504	0.0354841	0.0751571	0.0272812	0.106762
CUB	0.0743932	0.0714776	0.0205546	0.0517375	0.0973057	0.0415017	0.164911
ECU	0.0749846	0.067796	0.0211907	0.0554251	0.0991764	0.0393935	0.155392
DEU	0.0960345	0.0903509	0.0306785	0.0662125	0.135145	0.0420295	0.215679
BFA	0.0624206	0.0598848	0.016868	0.0435945	0.0862056	0.0336414	0.11236
MDG	0.0555152	0.0508322	0.0163983	0.0382808	0.0771512	0.0319092	0.106901
KGZ	0.0619291	0.0595564	0.0183557	0.0415098	0.0836934	0.0351245	0.135902
IRQ	0.0661803	0.0624491	0.0199549	0.0453776	0.0936489	0.0336824	0.135882
SOM	0.0654152	0.0634493	0.0139422	0.0479722	0.0834652	0.0376127	0.10542
NAM	0.0589269	0.0556715	0.016268	0.040227	0.0807779	0.0314716	0.10806
ARE	0.0594481	0.0564363	0.016524	0.0402979	0.0804466	0.0328593	0.135567
HUN	0.0809003	0.077611	0.022461	0.0541428	0.112115	0.0415167	0.154597
SEN	0.059896	0.0553548	0.0218438	0.0377803	0.0893207	0.0301601	0.149899
LBY	0.053666	0.049319	0.0160707	0.0373109	0.0701163	0.0288103	0.117578
SDN	0.0739824	0.0724879	0.0217209	0.0470267	0.100946	0.0359398	0.133481
MYS	0.0630177	0.0606952	0.0159863	0.0449194	0.0798399	0.035071	0.128049
SUR	0.0600479	0.0576778	0.0160979	0.0432351	0.0832349	0.0340212	0.11271
BLZ	0.0688663	0.0675257	0.0155669	0.0512753	0.0862844	0.039576	0.119111
SVN	0.0947929	0.0880399	0.0315075	0.0644042	0.134844	0.051314	0.231064
CZE	0.0758553	0.0720691	0.022346	0.0514801	0.107364	0.039987	0.137019
IRN	0.0610228	0.0586045	0.0176188	0.0442405	0.0779528	0.0317529	0.156904
SLE	0.0636789	0.0596762	0.0166623	0.0459761	0.0859029	0.0345626	0.129658
JOR	0.0577537	0.0567952	0.0149543	0.0398308	0.0752832	0.0321639	0.120853
LTU	0.0802791	0.0779741	0.0215595	0.0530063	0.10716	0.0363509	0.144185
SWE	0.0774375	0.071371	0.0259952	0.0531267	0.122263	0.0398716	0.174278
POL	0.086992	0.0842393	0.0239511	0.0632641	0.116272	0.0366218	0.179367
TZA	0.0561018	0.0539861	0.0158881	0.0399774	0.0724613	0.0256856	0.119079
VEN	0.0870061	0.0834201	0.0229211	0.0640746	0.114367	0.0453446	0.199971
KEN	0.0634476	0.0632132	0.0162963	0.0423242	0.0842681	0.027522	0.111371
SVK	0.0805815	0.0757752	0.0229884	0.0560545	0.111356	0.0442447	0.15404
GBR	0.070602	0.068864	0.016065	0.0536072	0.0900067	0.0360936	0.140364
MAR	0.0582795	0.0567708	0.0137468	0.0421975	0.0748188	0.0286763	0.0968715
AGO	0.0622796	0.0609083	0.0187392	0.0389078	0.082456	0.0301458	0.146065
KWT	0.0508421	0.0493652	0.0159221	0.0343223	0.0674212	0.0242341	0.131237
UGA	0.0570385	0.0553201	0.0147554	0.0401457	0.0735869	0.0287051	0.103241
KHM	0.0545981	0.051282	0.0150106	0.0387213	0.0736555	0.0258543	0.12078
COD	0.0647504	0.063266	0.0209722	0.0424899	0.0868891	0.0301387	0.15396
QAT	0.0483955	0.0456589	0.0135363	0.0330853	0.0670666	0.0230553	0.0925347
BGD	0.0595281	0.0551407	0.0178322	0.0406498	0.080183	0.0305667	0.142865
GRC	0.0912183	0.0861731	0.0304081	0.0587132	0.130812	0.0417715	0.208029
IND	0.0551254	0.0532051	0.0156569	0.0372308	0.0742271	0.0294444	0.1101
MDA	0.0674311	0.0666798	0.0177037	0.0470496	0.092096	0.0358609	0.125753
GAB	0.0680006	0.0642166	0.0193079	0.0474021	0.0944149	0.0370214	0.129848
MWI	0.0623824	0.0585773	0.0179007	0.0439851	0.08547	0.0301376	0.140971
EGY	0.0651116	0.0639667	0.0144592	0.0481107	0.0837861	0.0265737	0.105025
MNE	0.0705929	0.0672588	0.019913	0.0510598	0.0955029	0.0374126	0.158359
ZAF	0.0579612	0.0533233	0.0189046	0.037148	0.08177	0.0291108	0.122555
MKD	0.0608527	0.0591263	0.0143058	0.0441855	0.0811916	0.0281654	0.103805
BHS	0.0648379	0.0621162	0.0208216	0.0433254	0.0862512	0.0342249	0.170966
ZWE	0.0657544	0.0624685	0.0168217	0.0456404	0.0879425	0.0316168	0.132962
IRL	0.0896826	0.0871904	0.0291573	0.0581876	0.12126	0.0428005	0.19871
LKA	0.0683327	0.0668494	0.018901	0.0469242	0.0902954	0.0400845	0.161408
SRB	0.0619354	0.0603328	0.0165102	0.044356	0.0796779	0.0307676	0.124549
COG	0.0664818	0.0655265	0.0153603	0.04669	0.0890888	0.0364655	0.107623
NZL	0.07162	0.0701784	0.0167505	0.0501483	0.096408	0.0289842	0.1042
LVA	0.0812865	0.0747586	0.0297999	0.0518803	0.125108	0.0395995	0.194744
AUS	0.0722523	0.0685729	0.017319	0.0516606	0.0978539	0.039605	0.123963
FLK	0.0687241	0.0653423	0.0172869	0.0504526	0.0937511	0.0359859	0.129596
ISR	0.0640976	0.0607031	0.018841	0.04692	0.0824139	0.0320715	0.153193
COL	0.0566927	0.0543639	0.0150408	0.0409357	0.076318	0.0326222	0.102153
FIN	0.0884438	0.0875226	0.0246965	0.0585773	0.126339	0.0524397	0.16473
GMB	0.0537802	0.0508611	0.0168899	0.0364624	0.0743379	0.0251295	0.106
PRT	0.0913533	0.0861802	0.0353246	0.0606378	0.131596	0.0370163	0.312697
SAU	0.0659581	0.0631264	0.0160283	0.0482959	0.0849106	0.0314095	0.126813
PNG	0.0555313	0.0521857	0.0152704	0.0403383	0.0769725	0.0323971	0.101866
JAM	0.0600915	0.0570668	0.0160717	0.0440483	0.0797224	0.0373641	0.132411
PAK	0.0654393	0.0615297	0.0147391	0.0493476	0.0846721	0.0368645	0.112447
ZMB	0.0640576	0.0603545	0.0266613	0.0430831	0.0850765	0.031415	0.252002
CHN	0.075692	0.0686967	0.028773	0.0476367	0.110804	0.0323679	0.191442
KAZ	0.0526429	0.0487985	0.0147661	0.0370884	0.071223	0.0287966	0.0966971
ARM	0.0576438	0.0552982	0.0157796	0.0405011	0.0797023	0.0304834	0.105111
LUX	0.0920617	0.0869203	0.0268898	0.0648164	0.128379	0.0425707	0.175858
ALB	0.0584241	0.0556363	0.0168682	0.040366	0.0813839	0.0318066	0.118459
HND	0.0640978	0.0638019	0.0158846	0.0450128	0.0838261	0.037099	0.108659
NIC	0.0606928	0.0579896	0.0174511	0.0423292	0.0847284	0.0329498	0.114034
NER	0.0610565	0.0579073	0.0154744	0.0431872	0.0824991	0.0296578	0.11881
ETH	0.0707678	0.0676885	0.0203018	0.0495835	0.0908876	0.0406068	0.15649
GRL	0.0600042	0.0542532	0.0179005	0.0418291	0.0859142	0.0320777	0.141613
OMN	0.0683326	0.0642124	0.0190112	0.0489522	0.0898922	0.0349515	0.139724
ESP	0.0866639	0.0835722	0.0224043	0.0623408	0.118728	0.0441674	0.154366
TJK	0.0577767	0.0555098	0.0160294	0.0382083	0.0774944	0.0261882	0.108629
YEM	0.0733065	0.0718235	0.0157943	0.0556022	0.0928917	0.0402954	0.126674
THA	0.0579004	0.0581406	0.0134191	0.0406131	0.0741762	0.0317447	0.100265
UZB	0.0522982	0.050771	0.0145203	0.0370713	0.0663803	0.0254071	0.114513
DZA	0.0580593	0.0549742	0.0187472	0.0409821	0.0746045	0.0294183	0.170275
FRA	0.0908769	0.0865038	0.0274154	0.0610657	0.117136	0.0470855	0.191696
CRI	0.0628716	0.0595977	0.0172971	0.043718	0.0869206	0.0353883	0.115901
AUT	0.0785409	0.0736844	0.0257174	0.0503342	0.111985	0.0430611	0.174796
GHA	0.0675133	0.0650289	0.0205852	0.0453724	0.0959733	0.0381623	0.153644
MEX	0.0581418	0.0534528	0.0186411	0.0396403	0.0847091	0.0312658	0.133781
HTI	0.069911	0.0666434	0.0199035	0.0497648	0.0983616	0.035137	0.130682
JPN	0.0894496	0.0821949	0.0296992	0.0590354	0.128366	0.0519785	0.212678
NPL	0.0578992	0.0557578	0.0176984	0.0415465	0.0764111	0.0294698	0.151627
BGR	0.0868491	0.0825427	0.0257162	0.0594801	0.116317	0.0407907	0.19428
DNK	0.0859587	0.0815819	0.0220007	0.0632782	0.113028	0.0459431	0.166189
MMR	0.0668774	0.0663507	0.0150507	0.0475292	0.0870987	0.0395264	0.103566
SWZ	0.0542953	0.0517344	0.0176586	0.036635	0.0727518	0.0281401	0.143516
CYP	0.0870587	0.0824753	0.0268931	0.0576814	0.125684	0.0436971	0.179525
ROU	0.0936776	0.0877491	0.0287439	0.0621826	0.13225	0.0425354	0.191833
DOM	0.0609942	0.0592449	0.0156626	0.0418391	0.0810284	0.033011	0.104602
BRA	0.0554747	0.0530302	0.0164974	0.0376423	0.071772	0.0271166	0.123256
ITA	0.0805451	0.0782803	0.0212597	0.0549641	0.105835	0.0460915	0.139736
SYR	0.0740957	0.0717145	0.0197811	0.0540509	0.0988774	0.0316332	0.150493
CHL	0.0557362	0.0517101	0.0164775	0.0362096	0.078448	0.0257417	0.110476
BEL	0.094428	0.0883876	0.0251123	0.0686099	0.124926	0.0465196	0.177851
EST	0.074696	0.0689087	0.0218688	0.0507527	0.103944	0.0402647	0.135367
LBN	0.0848209	0.0778295	0.0252782	0.0579779	0.122564	0.0395874	0.162654
GIN	0.0646884	0.0586639	0.0213582	0.0430926	0.0905612	0.0261489	0.147531
BRN	0.0575545	0.0543862	0.014748	0.0412871	0.0803002	0.0318546	0.10478
MNG	0.0588913	0.0556734	0.0155676	0.0408072	0.0765727	0.0330574	0.11822
PRY	0.0574171	0.0528464	0.0170756	0.041843	0.0790262	0.0321651	0.12475
USA	0.0503729	0.0476917	0.0131707	0.0361159	0.0674638	0.0298998	0.0992147
RWA	0.0560429	0.0537999	0.0144614	0.0390639	0.0759588	0.0277323	0.0964959
PRK	0.0750722	0.0707831	0.0203615	0.0517822	0.103761	0.0412499	0.144503
NGA	0.0604206	0.059729	0.0144785	0.04364	0.07966	0.0248937	0.115939
BWA	0.0509412	0.0473492	0.0160195	0.0357096	0.0683955	0.0280241	0.119646
NOR	0.0795513	0.0780887	0.0166757	0.0616087	0.104357	0.0467468	0.137051
BIH	0.0657517	0.0650725	0.0138628	0.0496909	0.0848573	0.0380487	0.115579
BOL	0.0750522	0.0719003	0.0184188	0.0545958	0.101346	0.0378383	0.122981
AZE	0.0602825	0.0587132	0.0153983	0.041444	0.0813994	0.0329027	0.109701
BLR	0.0849669	0.0803794	0.0248889	0.0615897	0.107658	0.0469517	0.229269
KOR	0.0686966	0.0662142	0.0160721	0.0494684	0.0924001	0.0434092	0.124267
RUS	0.0335553	0.0327493	0.00685729	0.0256514	0.0418192	0.0205601	0.0615874
PER	0.0560433	0.0519912	0.0173002	0.0418111	0.0751179	0.0315676	0.142422
VNM	0.0576974	0.0550619	0.014489	0.040293	0.0746977	0.0337928	0.116601
PSE	0.0816388	0.0799049	0.0217884	0.0574483	0.107521	0.0461295	0.165628
TUN	0.0648557	0.060663	0.0166354	0.0472747	0.0891024	0.0356976	0.117262
NLD	0.0918219	0.0876435	0.0265779	0.062905	0.120332	0.040553	0.19839
GTM	0.0615094	0.0567509	0.0183977	0.0425667	0.0801118	0.0372632	0.144586
URY	0.0571646	0.0526731	0.0189347	0.0380102	0.0789526	0.0313881	0.137346
HRV	0.0869941	0.0788034	0.0271845	0.0574858	0.121067	0.0419892	0.181261
IDN	0.0575206	0.0559321	0.0151694	0.0402853	0.0775162	0.0291431	0.107387
LAO	0.0683511	0.0643596	0.0195127	0.0469997	0.0938683	0.0336495	0.116403
GUY	0.0576488	0.0555492	0.0180011	0.0403936	0.0798444	0.0307003	0.127509
SLB	0.0618759	0.0607799	0.015455	0.0447879	0.0815939	0.0344909	0.106769
ISL	0.0803407	0.0778487	0.0211472	0.0552297	0.110029	0.0406554	0.149731
MOZ	0.0644637	0.0618811	0.015592	0.0477805	0.0832305	0.0388015	0.121036
MLI	0.0609778	0.0590357	0.0165945	0.041926	0.0827672	0.0340356	0.11759
PHL	0.056635	0.0544143	0.0165115	0.0377854	0.0793526	0.027045	0.123006
CAN	0.0691737	0.0666406	0.017646	0.0479584	0.0947336	0.0367056	0.124711
CMR	0.0613111	0.0579168	0.0199546	0.0433219	0.0817113	0.0322733	0.169299
FJI	0.0635503	0.0614807	0.0185974	0.0409565	0.0887868	0.0311644	0.118117
CIV	0.0544297	0.0534909	0.0154673	0.0390467	0.0694682	0.0317169	0.156703
TUR	0.0716799	0.0686081	0.0166603	0.0544652	0.0905568	0.0355141	0.133531
LBR	0.063829	0.0637395	0.0155366	0.0445193	0.0839103	0.0320942	0.125521
BEN	0.0573936	0.0554305	0.0145891	0.0398893	0.0760471	0.023857	0.0969614

## Sheet: Stats_CuCl
	mean	median	std	p10	p90	min	max
ARG	0.102421	0.0975552	0.0280874	0.0704208	0.139168	0.0593861	0.215607
CHE	0.0690626	0.0666182	0.0156596	0.04969	0.0933772	0.0402967	0.124042
USA	0.0611398	0.0582112	0.0185214	0.0403883	0.0908379	0.0317958	0.111756
UKR	0.0849685	0.080623	0.0190877	0.0660107	0.106979	0.0403133	0.161262
IND	0.079988	0.0736824	0.0292243	0.0479864	0.124563	0.0375418	0.16048
ESP	0.102615	0.0930924	0.034707	0.0683321	0.148443	0.0581434	0.258615
ARE	0.0830381	0.0781888	0.0256489	0.0549662	0.12354	0.0426912	0.155662
KOR	0.0959487	0.0930642	0.0236997	0.0711306	0.125846	0.0564868	0.182837
HUN	0.07517	0.0735199	0.0188942	0.0505057	0.098413	0.039999	0.122853
RUS	0.0761524	0.069775	0.0231669	0.0516704	0.109565	0.0376389	0.1497
FRA	0.0638075	0.0627177	0.0154814	0.0467745	0.0874469	0.027672	0.114881
ZAF	0.111565	0.10751	0.0327114	0.0723087	0.154574	0.0508874	0.212906
NLD	0.117623	0.112715	0.0360278	0.0769326	0.165235	0.04718	0.270753
SVN	0.0829086	0.0809755	0.0220343	0.0599037	0.105817	0.0495495	0.190198
CZE	0.0859516	0.0814641	0.0242925	0.0571003	0.119617	0.0406118	0.149011
IRN	0.115989	0.107157	0.0344008	0.0794893	0.168101	0.0595527	0.239708
MEX	0.103348	0.0968705	0.0335272	0.0674078	0.145702	0.0465568	0.227047
JPN	0.136182	0.126145	0.0467559	0.082227	0.199541	0.0534457	0.290132
BGR	0.0723887	0.0683763	0.0210303	0.0520977	0.103819	0.0342496	0.128513
SWE	0.0538424	0.0524495	0.0148758	0.0372293	0.0744006	0.0223381	0.0956138
FIN	0.0836501	0.0802614	0.0217231	0.0629251	0.110207	0.0462258	0.186866
CAN	0.118186	0.111308	0.0431195	0.0746936	0.166674	0.0603415	0.396829
ROU	0.0809664	0.0777394	0.024019	0.0560762	0.114611	0.0405695	0.160761
SVK	0.149757	0.135729	0.0500816	0.0994452	0.209418	0.081917	0.368071
GBR	0.108615	0.105212	0.0291766	0.0753809	0.149453	0.0571739	0.185006
PAK	0.0901778	0.0862938	0.0237593	0.0669021	0.120598	0.0466963	0.178271
BRA	0.102068	0.0933741	0.0417464	0.0621659	0.149652	0.0493387	0.335967
CHN	0.0947417	0.0889524	0.0303997	0.0646259	0.126328	0.0483963	0.20115
ARM	0.0756992	0.0715618	0.0237212	0.0499589	0.109945	0.0354354	0.142
BEL	0.103168	0.102298	0.0266442	0.0720764	0.139969	0.0502704	0.168378

## Sheet: Stats_HB
	mean	median	std	p10	p90	min	max
CHE	0.207704	0.197743	0.0677781	0.128921	0.298831	0.100347	0.447713
SLV	0.179237	0.165516	0.0651454	0.102159	0.266646	0.0622832	0.358809
ARG	0.20175	0.19146	0.0733745	0.124019	0.279642	0.0903369	0.456851
PAN	0.174644	0.162529	0.0754434	0.100053	0.255734	0.0609905	0.559721
UKR	0.208246	0.19221	0.0825568	0.127269	0.305107	0.0782117	0.544695
GEO	0.16185	0.150977	0.0623738	0.0905005	0.261992	0.0586829	0.32579
CUB	0.236572	0.222508	0.0860584	0.143074	0.358813	0.108472	0.586342
ECU	0.230451	0.2147	0.0839857	0.128217	0.355503	0.10278	0.483863
DEU	0.14814	0.142947	0.0483556	0.0934153	0.21109	0.0672277	0.380839
BFA	0.176159	0.170088	0.0646996	0.11212	0.250701	0.0764113	0.410766
MDG	0.14848	0.1402	0.0476468	0.101912	0.211434	0.0365599	0.295875
KGZ	0.174679	0.165787	0.0655848	0.1044	0.279861	0.0561795	0.352373
IRQ	0.169655	0.153539	0.0637641	0.104446	0.263729	0.0763637	0.382601
SOM	0.150582	0.142346	0.0518747	0.0910346	0.219227	0.064891	0.300555
NAM	0.145223	0.134179	0.0542898	0.0823329	0.22658	0.0564751	0.326708
ARE	0.118419	0.111379	0.0448436	0.0715942	0.174182	0.0363488	0.291545
HUN	0.160521	0.145406	0.0522535	0.106792	0.231656	0.0671786	0.382024
SEN	0.148324	0.136422	0.0571641	0.0877182	0.234016	0.0638872	0.332896
LBY	0.10208	0.0936284	0.0365499	0.0672562	0.149206	0.0395508	0.272941
SDN	0.169796	0.159114	0.0589839	0.0996603	0.256206	0.0619591	0.350082
MYS	0.198844	0.169608	0.0885437	0.114781	0.306702	0.0852476	0.609418
SUR	0.176958	0.165749	0.0598122	0.117149	0.253274	0.0757474	0.449226
BLZ	0.187548	0.167912	0.0685834	0.109406	0.280642	0.0744863	0.440318
SVN	0.220522	0.198314	0.0892906	0.115796	0.350416	0.0847009	0.536872
CZE	0.162607	0.148434	0.0727129	0.0961426	0.235759	0.0750731	0.596378
IRN	0.185793	0.175533	0.0738695	0.10153	0.292042	0.0695015	0.404641
SLE	0.186687	0.177657	0.0640433	0.110961	0.279952	0.0612082	0.349138
JOR	0.135354	0.121522	0.0501868	0.081529	0.215109	0.0578047	0.272355
LTU	0.147018	0.135954	0.0550197	0.08775	0.222226	0.0579149	0.342521
SWE	0.13944	0.12916	0.0536775	0.0827033	0.217384	0.0541591	0.311956
POL	0.151547	0.144664	0.0560115	0.0953777	0.219832	0.0644351	0.366873
TZA	0.184217	0.18035	0.0661838	0.107171	0.275477	0.0787164	0.446805
VEN	0.289113	0.261298	0.12582	0.165278	0.454588	0.105305	0.904767
KEN	0.162819	0.152996	0.0557498	0.097702	0.236747	0.0597925	0.344476
SVK	0.161704	0.148231	0.0540019	0.102178	0.238263	0.0891445	0.380067
GBR	0.145871	0.133537	0.0530039	0.0854666	0.217931	0.057244	0.269139
MAR	0.121012	0.111411	0.048693	0.0717457	0.20323	0.0452034	0.274511
AGO	0.178287	0.163808	0.0652654	0.107206	0.263597	0.0692667	0.367232
KWT	0.0996258	0.09277	0.03921	0.0568935	0.149621	0.0429358	0.227855
UGA	0.181668	0.172051	0.0647627	0.105954	0.273372	0.0668667	0.383625
KHM	0.163754	0.155718	0.0601532	0.0955781	0.231518	0.0719191	0.40726
COD	0.178172	0.170586	0.0624757	0.107262	0.256563	0.0833734	0.424934
QAT	0.110919	0.100593	0.0419564	0.0691996	0.166663	0.0408227	0.254581
BGD	0.183096	0.168702	0.0740443	0.109578	0.262413	0.0606588	0.467272
GRC	0.186173	0.156787	0.0814621	0.101619	0.312632	0.0763777	0.398066
IND	0.171991	0.160746	0.0654702	0.0897828	0.256601	0.0678967	0.376593
MDA	0.16586	0.156106	0.0573809	0.102177	0.243228	0.0691897	0.34225
GAB	0.202492	0.186886	0.0756072	0.11578	0.303064	0.0836498	0.434959
MWI	0.165662	0.154189	0.0623853	0.104279	0.235348	0.0655621	0.428473
EGY	0.143064	0.134433	0.0522028	0.0901051	0.210258	0.060327	0.326722
MNE	0.206148	0.190587	0.0738963	0.130089	0.31079	0.0857621	0.414978
ZAF	0.136625	0.128292	0.051022	0.0810745	0.194795	0.0470595	0.323772
MKD	0.194683	0.181956	0.0762715	0.117364	0.291767	0.0736477	0.497142
BHS	0.15322	0.140119	0.0643001	0.0863383	0.242876	0.0576761	0.47252
ZWE	0.175578	0.166967	0.0644006	0.10009	0.264853	0.0835405	0.395593
IRL	0.149377	0.139298	0.0579539	0.0898763	0.214399	0.066566	0.431878
LKA	0.182294	0.175835	0.0611587	0.109768	0.246876	0.0777491	0.444832
SRB	0.195712	0.180772	0.0723131	0.122247	0.277142	0.0718567	0.461382
COG	0.202678	0.182867	0.0758003	0.128912	0.284582	0.0871977	0.474949
NZL	0.146002	0.139529	0.0504624	0.0919009	0.21989	0.0671615	0.31791
LVA	0.152587	0.139609	0.0592631	0.093482	0.22103	0.0560822	0.404991
AUS	0.143244	0.130642	0.0462177	0.0918354	0.195277	0.076154	0.282232
FLK	0.296581	0.272439	0.108066	0.19384	0.456663	0.142457	0.610788
ISR	0.133586	0.131498	0.0494202	0.080478	0.183087	0.0507092	0.343559
COL	0.151702	0.138629	0.066623	0.087254	0.253507	0.0643707	0.445352
FIN	0.266101	0.242985	0.106231	0.152063	0.389475	0.109866	0.738052
GMB	0.147118	0.141368	0.0592038	0.0758919	0.225596	0.0535339	0.388212
PRT	0.148568	0.135199	0.0568026	0.0881645	0.229093	0.0669824	0.377837
SAU	0.13287	0.122534	0.0509811	0.0870274	0.1913	0.0584275	0.359785
PNG	0.17253	0.166371	0.0624546	0.100938	0.24422	0.0741171	0.429753
JAM	0.182754	0.166241	0.063098	0.122507	0.275535	0.0837944	0.420219
PAK	0.205427	0.194224	0.0726295	0.121701	0.320289	0.095181	0.4083
ZMB	0.188099	0.171241	0.0686665	0.121298	0.269471	0.0721803	0.435754
CHN	0.119954	0.115651	0.0436273	0.0680335	0.16807	0.0483553	0.245228
KAZ	0.136438	0.128662	0.0499496	0.0844089	0.199203	0.0639349	0.328815
ARM	0.163209	0.1512	0.0584774	0.103179	0.231814	0.0727155	0.432792
LUX	0.15548	0.137071	0.0644451	0.0935235	0.23709	0.0778437	0.453835
ALB	0.181037	0.170181	0.0624325	0.112215	0.264006	0.0789771	0.418693
HND	0.17257	0.15755	0.0702358	0.105862	0.243379	0.0811981	0.582772
NIC	0.178638	0.170596	0.0700418	0.111394	0.269572	0.0699031	0.430039
NER	0.138442	0.13003	0.053105	0.0847124	0.213835	0.0546344	0.358327
ETH	0.204124	0.182996	0.0867264	0.120239	0.319374	0.0819864	0.664249
GRL	0.294854	0.262301	0.12874	0.161452	0.434411	0.102327	0.808925
OMN	0.143416	0.139303	0.0477998	0.0887413	0.211687	0.0541666	0.295854
ESP	0.146012	0.133364	0.0518557	0.0903018	0.216472	0.0642043	0.325316
TJK	0.163764	0.148832	0.0606042	0.0995029	0.244258	0.0736331	0.399986
YEM	0.226254	0.202601	0.0876857	0.143739	0.337666	0.0926448	0.650998
THA	0.174686	0.164927	0.0623985	0.105597	0.263281	0.0848502	0.435014
UZB	0.132426	0.125134	0.0512163	0.0793181	0.201098	0.0510269	0.31751
DZA	0.135458	0.134799	0.0422994	0.0810697	0.18944	0.0606485	0.267159
FRA	0.155739	0.142897	0.062335	0.091945	0.247287	0.0640007	0.449797
CRI	0.182764	0.177935	0.066825	0.110815	0.267945	0.0552281	0.41475
AUT	0.143778	0.134665	0.0595276	0.0835274	0.213026	0.0576392	0.416806
GHA	0.200194	0.173696	0.0939009	0.11113	0.310953	0.0762458	0.660201
MEX	0.154901	0.143671	0.0544599	0.090663	0.226647	0.065451	0.303541
HTI	0.188055	0.172286	0.0713044	0.111223	0.283236	0.0754142	0.415839
JPN	0.236595	0.212323	0.0842311	0.147799	0.342905	0.105269	0.586102
NPL	0.166538	0.152872	0.0685332	0.0976218	0.252881	0.0734423	0.439962
BGR	0.180731	0.156723	0.0823942	0.102962	0.291437	0.0798619	0.510175
DNK	0.129356	0.11719	0.050638	0.0694058	0.206383	0.044406	0.255035
MMR	0.192249	0.18907	0.0601056	0.123152	0.278739	0.0806962	0.396652
SWZ	0.148545	0.137927	0.0621612	0.0795803	0.222441	0.0540049	0.406199
CYP	0.214023	0.211232	0.0751525	0.122573	0.300943	0.0919465	0.468125
ROU	0.182378	0.173286	0.0673455	0.109589	0.273751	0.0828112	0.437687
DOM	0.17027	0.149301	0.0720629	0.0940995	0.279571	0.0683002	0.375782
BRA	0.13946	0.133956	0.0533593	0.0826218	0.209166	0.0516043	0.390499
ITA	0.179668	0.171183	0.0659772	0.099391	0.264363	0.0652993	0.381198
SYR	0.170361	0.15677	0.0584267	0.107725	0.271133	0.0723379	0.32185
CHL	0.121771	0.112793	0.0492604	0.0714873	0.17842	0.0534072	0.343914
BEL	0.142758	0.134828	0.0433751	0.0918809	0.208699	0.0662966	0.251526
EST	0.141012	0.130516	0.0515436	0.0862732	0.201176	0.0644858	0.315849
LBN	0.283676	0.25297	0.118084	0.162078	0.440083	0.117596	0.771983
GIN	0.202705	0.182748	0.0763418	0.115129	0.320034	0.0892661	0.4095
BRN	0.166114	0.148186	0.0710039	0.0951534	0.253189	0.0613932	0.452128
MNG	0.13782	0.12889	0.0487041	0.0835831	0.197863	0.0608073	0.299653
PRY	0.141081	0.138096	0.0484695	0.084939	0.201659	0.0544668	0.281247
USA	0.130205	0.125631	0.048402	0.0767887	0.186244	0.0547743	0.335027
RWA	0.180843	0.164399	0.0656435	0.111917	0.266065	0.0761588	0.416234
PRK	0.184526	0.164589	0.0741559	0.113246	0.270862	0.0817605	0.473093
NGA	0.172969	0.164904	0.074056	0.102109	0.239121	0.0676473	0.686459
BWA	0.13639	0.129368	0.0551061	0.0786545	0.202727	0.0422961	0.414045
NOR	0.195751	0.174653	0.0894768	0.116432	0.289487	0.0701962	0.577707
BIH	0.234937	0.214761	0.0860622	0.151308	0.32989	0.124911	0.642969
BOL	0.223915	0.200301	0.08838	0.138648	0.353683	0.0938808	0.475843
AZE	0.185758	0.172086	0.068534	0.106964	0.295977	0.0840165	0.357302
BLR	0.230459	0.21006	0.0909325	0.134975	0.340856	0.0939517	0.516562
KOR	0.164883	0.15261	0.0606394	0.102228	0.257298	0.0614072	0.342324
RUS	0.159808	0.150093	0.0670964	0.0904765	0.229151	0.063936	0.444385
PER	0.171581	0.153242	0.0750167	0.103639	0.278835	0.0791001	0.441032
VNM	0.163144	0.146054	0.0616299	0.102367	0.240401	0.0779528	0.365725
PSE	0.196719	0.18468	0.0608355	0.13516	0.272843	0.09439	0.379334
TUN	0.159097	0.15453	0.0540408	0.0932215	0.22325	0.0578464	0.394463
NLD	0.137421	0.124656	0.0489327	0.0885303	0.204391	0.0460236	0.301149
GTM	0.181417	0.168632	0.0806456	0.099555	0.280892	0.0770441	0.472776
URY	0.113707	0.101894	0.0431537	0.064443	0.168202	0.0510624	0.278081
HRV	0.175119	0.168799	0.0674366	0.102801	0.242346	0.0730565	0.448192
IDN	0.157413	0.154161	0.0556927	0.0906932	0.241375	0.0734415	0.360686
LAO	0.186093	0.174008	0.0644261	0.120315	0.263739	0.0934874	0.447671
GUY	0.178343	0.156358	0.065546	0.115285	0.267981	0.0848695	0.374653
SLB	0.182792	0.176712	0.0636652	0.113354	0.26408	0.080674	0.400773
ISL	0.302454	0.294746	0.109525	0.162928	0.440668	0.115768	0.676158
MOZ	0.182217	0.167909	0.0643286	0.107548	0.266741	0.0658256	0.368772
MLI	0.14135	0.134002	0.0539589	0.0904674	0.195497	0.0572174	0.391162
PHL	0.179689	0.162595	0.0791989	0.103299	0.293062	0.0690717	0.504153
CAN	0.140714	0.12799	0.0490361	0.0867368	0.208254	0.0566775	0.283646
CMR	0.190549	0.174959	0.0824811	0.106214	0.31274	0.0717313	0.515593
FJI	0.174617	0.160673	0.0696236	0.102234	0.262571	0.0672966	0.385499
CIV	0.173715	0.168837	0.0646949	0.103863	0.252525	0.0771842	0.405952
TUR	0.20009	0.187042	0.0770973	0.124438	0.279249	0.0891366	0.54841
LBR	0.20464	0.189726	0.0791702	0.114381	0.31519	0.0711186	0.43658
BEN	0.178265	0.168986	0.0653453	0.102806	0.272056	0.0771188	0.370092

## Sheet: Stats_HTL
	mean	median	std	p10	p90	min	max
CHE	0.152532	0.147677	0.0286056	0.121829	0.181363	0.106401	0.263584
SLV	0.114896	0.112141	0.0219058	0.0900831	0.144283	0.0758623	0.168733
ARG	0.122083	0.121333	0.0252789	0.0927792	0.153509	0.0808263	0.227581
PAN	0.100964	0.0978697	0.0174117	0.080027	0.121957	0.0724712	0.154966
UKR	0.143361	0.138664	0.026693	0.115066	0.180535	0.0925564	0.224997
GEO	0.0824278	0.0811341	0.0139551	0.0644639	0.100794	0.0482798	0.123715
CUB	0.140598	0.138605	0.0305595	0.103699	0.179654	0.0866476	0.234507
ECU	0.126147	0.125147	0.0243471	0.0968705	0.157099	0.0700128	0.196903
DEU	0.137128	0.135606	0.0209236	0.113111	0.160392	0.104117	0.207565
BFA	0.095168	0.0959517	0.016874	0.073868	0.116033	0.0507504	0.145604
MDG	0.082936	0.0819414	0.0153745	0.0633646	0.104026	0.0521216	0.117424
KGZ	0.098773	0.096416	0.0185256	0.0762803	0.122776	0.0632495	0.154966
IRQ	0.115689	0.112374	0.0218057	0.0914185	0.144633	0.0796527	0.186682
SOM	0.11445	0.110615	0.0233837	0.0885441	0.144679	0.0675794	0.220568
NAM	0.091957	0.0914062	0.0177969	0.0722818	0.115281	0.0612369	0.15025
ARE	0.0944637	0.0926221	0.0150479	0.0775486	0.112322	0.0687619	0.153282
HUN	0.104537	0.101721	0.0164842	0.0863816	0.125653	0.0744155	0.158484
SEN	0.0723161	0.0708832	0.0151976	0.0556836	0.0911082	0.0479624	0.142715
LBY	0.0731889	0.0701468	0.0127848	0.058867	0.0920157	0.0521016	0.108329
SDN	0.12895	0.125608	0.0335518	0.0895098	0.169646	0.0716244	0.297926
MYS	0.0872457	0.0836265	0.0176972	0.067695	0.108376	0.0571871	0.150974
SUR	0.0970437	0.0954364	0.0179451	0.0763684	0.121099	0.0644859	0.161142
BLZ	0.124713	0.122842	0.0243416	0.0958006	0.154638	0.07689	0.217743
SVN	0.129146	0.12807	0.0197821	0.107589	0.156891	0.0927576	0.205163
CZE	0.0939869	0.092508	0.0153351	0.0776649	0.11318	0.0644267	0.150795
IRN	0.106433	0.102618	0.0206178	0.0816343	0.132835	0.0716059	0.180779
SLE	0.101788	0.0990771	0.0233592	0.0738401	0.13169	0.0568402	0.191054
JOR	0.0964	0.0959026	0.0161696	0.0779297	0.120885	0.0651908	0.145511
LTU	0.108383	0.105367	0.0176894	0.08989	0.134859	0.0790665	0.178842
SWE	0.0904488	0.0887966	0.0142159	0.0748671	0.109365	0.0606907	0.140498
POL	0.114063	0.111949	0.0172155	0.0956907	0.134654	0.0788738	0.179321
TZA	0.0875024	0.0854236	0.0168355	0.0689681	0.106511	0.0528924	0.144616
VEN	0.153269	0.151494	0.0324822	0.114941	0.195724	0.0890251	0.247509
KEN	0.114756	0.112204	0.0216965	0.0930904	0.13979	0.0761226	0.211669
SVK	0.110555	0.107742	0.0186406	0.09042	0.13415	0.0714724	0.174668
GBR	0.139669	0.137202	0.0240983	0.111411	0.168864	0.092833	0.227901
MAR	0.0818513	0.0792376	0.0152351	0.0659152	0.103024	0.054971	0.14085
AGO	0.092772	0.0903858	0.0189547	0.0714404	0.116682	0.0513193	0.15055
KWT	0.0745218	0.0723514	0.0106079	0.0624233	0.0880444	0.0561354	0.114913
UGA	0.0831321	0.0799179	0.0186385	0.0639991	0.106409	0.0502794	0.161838
KHM	0.0940664	0.0938856	0.0186391	0.0728472	0.118534	0.0601464	0.146208
COD	0.101913	0.101854	0.0165924	0.0824885	0.124448	0.0732385	0.157368
QAT	0.0732174	0.070459	0.012075	0.0601592	0.0857139	0.0531592	0.127719
BGD	0.102504	0.100963	0.0169318	0.0816649	0.12414	0.06662	0.149515
GRC	0.12192	0.121526	0.0184409	0.0994487	0.143561	0.0867	0.177525
IND	0.0740292	0.0719949	0.0126195	0.0615764	0.0876625	0.0513079	0.140993
MDA	0.112755	0.110067	0.0245491	0.0878087	0.144722	0.0763766	0.20725
GAB	0.119125	0.114571	0.0210981	0.0959973	0.144402	0.0816547	0.214463
MWI	0.0988027	0.0955441	0.0226442	0.0725459	0.126811	0.0598657	0.16455
EGY	0.0996482	0.095886	0.0210851	0.0778969	0.125315	0.0660885	0.210291
MNE	0.117461	0.116572	0.0235037	0.0899761	0.149394	0.0808877	0.194475
ZAF	0.0823329	0.0792334	0.0163353	0.0655324	0.10041	0.0565675	0.152059
MKD	0.105547	0.103202	0.0163456	0.0872253	0.125132	0.0726842	0.169486
BHS	0.104629	0.103202	0.0161098	0.083852	0.123822	0.0751639	0.150227
ZWE	0.104781	0.100812	0.0217113	0.0853661	0.133018	0.0678226	0.196469
IRL	0.128664	0.127207	0.020578	0.104838	0.150494	0.0970061	0.19703
LKA	0.125263	0.123407	0.0256395	0.0948939	0.15954	0.0817803	0.196897
SRB	0.107275	0.104939	0.0188061	0.085444	0.130578	0.0678815	0.161984
COG	0.113856	0.110111	0.0239984	0.0887499	0.139928	0.0664579	0.197306
NZL	0.122723	0.117113	0.0212509	0.100283	0.152015	0.0885222	0.190365
LVA	0.106791	0.105021	0.0180142	0.0858415	0.129554	0.0711871	0.183678
AUS	0.122587	0.12034	0.0211491	0.0996678	0.141521	0.0864294	0.212392
FLK	0.118278	0.114562	0.0243141	0.0875255	0.152704	0.0765512	0.176331
ISR	0.104207	0.10198	0.0188275	0.0811253	0.12872	0.073427	0.170583
COL	0.0836892	0.081153	0.0146837	0.0660349	0.105111	0.0541473	0.124278
FIN	0.126858	0.124679	0.0213439	0.100435	0.155214	0.0932822	0.202681
GMB	0.0788822	0.0764922	0.0154998	0.0619006	0.100184	0.0524273	0.14681
PRT	0.11609	0.113534	0.0189664	0.0944772	0.142597	0.0821625	0.178505
SAU	0.112076	0.109186	0.0192591	0.0898219	0.138197	0.0724804	0.188771
PNG	0.101366	0.0997778	0.0184961	0.0799829	0.12293	0.0713099	0.188758
JAM	0.103129	0.101109	0.0181874	0.0810379	0.126156	0.0707844	0.174608
PAK	0.121236	0.119101	0.0219228	0.0933074	0.149935	0.0734396	0.182247
ZMB	0.10264	0.0992587	0.0248555	0.0727406	0.13328	0.0532899	0.182025
CHN	0.0679965	0.0655902	0.0126425	0.0549254	0.0839177	0.0492418	0.118167
KAZ	0.0856906	0.0822887	0.0139783	0.0694685	0.1054	0.0570246	0.130548
ARM	0.0953841	0.0942877	0.0175605	0.0758965	0.115229	0.0615874	0.166362
LUX	0.135252	0.131145	0.0233168	0.110346	0.163361	0.0967325	0.220729
ALB	0.104613	0.104263	0.0171456	0.0855126	0.125566	0.0664554	0.162448
HND	0.107134	0.106342	0.0176456	0.0864385	0.131202	0.0718254	0.159551
NIC	0.0905869	0.0888584	0.0164098	0.0723386	0.107976	0.0578155	0.152113
NER	0.101407	0.101645	0.0229471	0.0748007	0.125699	0.0634665	0.210902
ETH	0.12046	0.117168	0.0267426	0.087227	0.153294	0.078492	0.201848
GRL	0.109759	0.105569	0.0189953	0.088471	0.13832	0.0717616	0.154479
OMN	0.111494	0.110569	0.0170264	0.0912447	0.129818	0.0778599	0.164764
ESP	0.128873	0.127679	0.02054	0.105072	0.152227	0.0886069	0.217219
TJK	0.0972008	0.0954595	0.0175923	0.0781669	0.118068	0.0720963	0.180444
YEM	0.14086	0.135366	0.0287782	0.112475	0.180344	0.0939106	0.258815
THA	0.0798761	0.0773864	0.0141307	0.0657779	0.0996809	0.0531729	0.139124
UZB	0.0867472	0.0855908	0.0149191	0.07001	0.107236	0.0603238	0.151366
DZA	0.0813278	0.0801773	0.0142403	0.0659429	0.100969	0.0525973	0.125416
FRA	0.135536	0.135271	0.020106	0.108878	0.156787	0.0937919	0.205915
CRI	0.110339	0.108808	0.0196617	0.0895583	0.137465	0.0734978	0.192925
AUT	0.0975107	0.0967212	0.0140221	0.0813455	0.11435	0.0681757	0.143142
GHA	0.106863	0.10607	0.0196948	0.0839241	0.129123	0.0647339	0.183394
MEX	0.0782552	0.0763545	0.0148745	0.0598215	0.0942777	0.050707	0.130987
HTI	0.121887	0.11822	0.0236641	0.0962712	0.149138	0.075387	0.215477
JPN	0.14758	0.143573	0.0208319	0.12476	0.176335	0.102541	0.204646
NPL	0.094572	0.0916874	0.0154693	0.0752962	0.1128	0.0687056	0.143481
BGR	0.110289	0.108262	0.0177943	0.0909513	0.131754	0.0776132	0.20232
DNK	0.130866	0.128058	0.0197024	0.110912	0.154839	0.0949536	0.216695
MMR	0.118251	0.115017	0.0255297	0.0887481	0.151581	0.0776144	0.198653
SWZ	0.0816241	0.0794721	0.0149958	0.0651935	0.0997855	0.05612	0.129052
CYP	0.119747	0.117493	0.0190391	0.0993703	0.146867	0.0787941	0.205772
ROU	0.126234	0.123653	0.0215394	0.103052	0.14842	0.0930942	0.233821
DOM	0.100852	0.0978244	0.0182157	0.0793545	0.12298	0.0707787	0.177803
BRA	0.0808301	0.0782046	0.0145243	0.0647277	0.0995415	0.0529214	0.137311
ITA	0.106688	0.105452	0.0162757	0.0858242	0.128844	0.074383	0.148189
SYR	0.139874	0.136559	0.0316347	0.100153	0.173718	0.0864434	0.235975
CHL	0.0778438	0.0759766	0.0128253	0.0629052	0.091015	0.0569594	0.137102
BEL	0.130651	0.127773	0.0225069	0.104879	0.153482	0.0918063	0.226982
EST	0.101866	0.100372	0.0156163	0.0823962	0.117332	0.0756157	0.169365
LBN	0.158805	0.151338	0.0393009	0.117898	0.199117	0.0947306	0.321131
GIN	0.10173	0.0976333	0.0240764	0.0749865	0.138868	0.0597988	0.191547
BRN	0.0915106	0.089327	0.0148615	0.0744508	0.11199	0.062032	0.134399
MNG	0.1015	0.0977856	0.0207779	0.0800948	0.128133	0.0620594	0.171583
PRY	0.0868725	0.0853854	0.0151902	0.0682029	0.10552	0.0546971	0.141294
USA	0.0978001	0.0958601	0.0162062	0.0780542	0.119022	0.0676271	0.165689
RWA	0.0837434	0.0837693	0.0152117	0.0635233	0.102581	0.0581185	0.128477
PRK	0.135255	0.132573	0.024773	0.104772	0.165687	0.0906799	0.20589
NGA	0.0944119	0.0902422	0.0212171	0.0731379	0.125453	0.0566007	0.154012
BWA	0.0707023	0.0703329	0.0124355	0.0564274	0.0842842	0.0469509	0.133187
NOR	0.138588	0.135892	0.0250438	0.110427	0.166316	0.091832	0.236186
BIH	0.123569	0.118048	0.0255022	0.0957619	0.15221	0.071469	0.22766
BOL	0.126231	0.122566	0.0269055	0.0956096	0.164337	0.0732307	0.213839
AZE	0.100899	0.0977467	0.0171438	0.081684	0.124088	0.0680992	0.161566
BLR	0.162898	0.163569	0.03442	0.11737	0.205081	0.0936507	0.273189
KOR	0.11436	0.111422	0.0208686	0.0898386	0.139636	0.0814956	0.192821
RUS	0.092527	0.0896256	0.0149624	0.0750493	0.116019	0.0643253	0.131952
PER	0.0772865	0.0760034	0.0137365	0.061851	0.0930124	0.0510199	0.122293
VNM	0.0925819	0.0911891	0.0156671	0.0749302	0.11226	0.0604955	0.136326
PSE	0.156302	0.151175	0.0329513	0.116318	0.198149	0.102678	0.275374
TUN	0.105793	0.101552	0.0211738	0.0838702	0.135242	0.0651875	0.176644
NLD	0.126419	0.124468	0.0217912	0.100737	0.148588	0.084744	0.224526
GTM	0.101324	0.0984115	0.0162043	0.0833448	0.120272	0.0708683	0.167239
URY	0.0768225	0.0733894	0.0136973	0.0619829	0.100829	0.0542155	0.121621
HRV	0.113382	0.11152	0.0177116	0.09313	0.135858	0.0829285	0.171503
IDN	0.094929	0.0927374	0.0171799	0.0764067	0.115412	0.0698804	0.167472
LAO	0.116212	0.112463	0.0254691	0.0876641	0.149937	0.0648188	0.204852
GUY	0.0807159	0.0793586	0.0136611	0.0618973	0.0994117	0.0517896	0.125585
SLB	0.106426	0.103088	0.0194344	0.0839257	0.135151	0.0701944	0.154067
ISL	0.145943	0.141144	0.0280251	0.118372	0.182754	0.0909925	0.262563
MOZ	0.105722	0.104194	0.0205545	0.0834211	0.128311	0.0646567	0.17692
MLI	0.0950196	0.0935145	0.0199496	0.0730137	0.124953	0.0575817	0.152762
PHL	0.0825309	0.0800677	0.0152737	0.0638747	0.100401	0.0575837	0.143029
CAN	0.120909	0.117994	0.0203216	0.0989095	0.142793	0.0787381	0.204973
CMR	0.0997732	0.0990852	0.0183199	0.0790381	0.127234	0.0577171	0.158819
FJI	0.106191	0.105168	0.0168134	0.0868952	0.127113	0.0680906	0.173558
CIV	0.0804472	0.0776028	0.0159345	0.0628273	0.0999469	0.0547822	0.138725
TUR	0.12723	0.124788	0.0235412	0.0978951	0.153539	0.0873793	0.208281
LBR	0.103282	0.103427	0.0209938	0.0776407	0.129597	0.0591988	0.166538
BEN	0.0873323	0.0865623	0.0158269	0.0675722	0.111512	0.0580816	0.128379

[truncated: 19 more sheets: Stats_HTSE, Stats_HVO_diesel, Stats_HVO_kerosene, Stats_M_PYR, Stats_PTM, Stats_RWGS_FT_diesel, Stats_RWGS_FT_kerosene, Stats_RWGS_MeOH_methanol, Stats_RWGS_MeOH_DME, Stats_RWGS_MeOH_kerosene, Stats_SMR_CCS, Stats_SOEC, Stats_SR_FT_diesel, Stats_SR_FT_kerosene, Stats_ST_FT_diesel, Stats_ST_FT_kerosene, Stats_TG_CCS, Stats_TG_FT_diesel, Stats_TG_FT_kerosene]
