# Supplementary material for: Global cost drivers and regional trade-offs for low-carbon fuels: a prospective techno-economic assessment
Source: Royal Society of Chemistry journal article supplement (doi:10.1039/d5ee05591a), 2026-01-01
Supplement: d5ee05591a2.zip [file monte_carlo_stats_15deg30.xlsx]

## Sheet: Stats_PEM
	mean	median	std	p10	p90	min	max
CHE	0.146131	0.140376	0.0294166	0.116058	0.182094	0.0908411	0.244386
SLV	0.127043	0.122851	0.0264235	0.0997193	0.160926	0.0839278	0.241931
ARG	0.121592	0.118995	0.0231476	0.0987255	0.150617	0.0773754	0.208647
PAN	0.103524	0.0998099	0.0205507	0.0799984	0.131037	0.067542	0.198779
UKR	0.13726	0.137407	0.0295749	0.099518	0.176207	0.0737529	0.254056
GEO	0.107786	0.103519	0.0252925	0.0776102	0.145735	0.0635603	0.173205
CUB	0.131991	0.129629	0.0260913	0.0981816	0.169838	0.0872541	0.194644
ECU	0.134097	0.129505	0.0256015	0.105948	0.167057	0.0842868	0.205039
DEU	0.105629	0.10413	0.0184378	0.0866535	0.131829	0.0681652	0.152638
BFA	0.105718	0.104326	0.0198852	0.0842925	0.12939	0.0660543	0.188528
MDG	0.0965495	0.0960816	0.0212897	0.0720194	0.118047	0.0629803	0.175914
KGZ	0.112212	0.108526	0.0238903	0.0844287	0.145781	0.0725255	0.186552
IRQ	0.101692	0.0998148	0.0211119	0.0749255	0.126274	0.0628193	0.167356
SOM	0.107075	0.10258	0.0208421	0.0844822	0.133056	0.0619449	0.176526
NAM	0.0972494	0.0966293	0.0202428	0.0719633	0.123395	0.0588128	0.177774
ARE	0.0865532	0.0846325	0.0178345	0.0650231	0.109223	0.051976	0.14199
HUN	0.104783	0.100487	0.0195436	0.0838728	0.132468	0.0616816	0.159355
SEN	0.0883613	0.0860943	0.0173042	0.067339	0.109965	0.0546593	0.138822
LBY	0.0789211	0.076263	0.0158687	0.0599029	0.100036	0.0482215	0.138306
SDN	0.116581	0.118916	0.0224329	0.0880692	0.144797	0.0604106	0.180756
MYS	0.103171	0.099167	0.0246772	0.0773798	0.131888	0.061488	0.212313
SUR	0.122596	0.120674	0.0249972	0.0941355	0.158261	0.0674007	0.202817
BLZ	0.128666	0.125481	0.0261978	0.101564	0.163246	0.0737894	0.218261
SVN	0.119927	0.117941	0.0247453	0.0855016	0.155324	0.0778969	0.180543
CZE	0.103902	0.102491	0.0260051	0.0747801	0.135304	0.0575923	0.192278
IRN	0.0983938	0.0952339	0.0182713	0.0745792	0.124334	0.0640042	0.139597
SLE	0.125243	0.119789	0.0281397	0.0971179	0.162882	0.0701918	0.213951
JOR	0.0895644	0.0862551	0.0177646	0.071692	0.111256	0.0566582	0.154637
LTU	0.096632	0.0930867	0.0203204	0.0725076	0.128608	0.0566758	0.151319
SWE	0.0936317	0.0932002	0.0212042	0.0681412	0.122042	0.0552937	0.15219
POL	0.102844	0.101895	0.0180222	0.0830311	0.125659	0.0673559	0.159091
TZA	0.102938	0.101569	0.0204041	0.0803819	0.129429	0.0595988	0.189679
VEN	0.168676	0.167123	0.0329593	0.132243	0.213078	0.104929	0.276088
KEN	0.101667	0.100521	0.0181603	0.0772352	0.125876	0.0495271	0.145507
SVK	0.105361	0.102965	0.0231206	0.0764008	0.141265	0.0633095	0.170539
GBR	0.104293	0.101524	0.021061	0.0809774	0.127517	0.0671733	0.176977
MAR	0.0847147	0.0820823	0.0175272	0.0662063	0.10486	0.054775	0.160771
AGO	0.120478	0.119508	0.0253874	0.0870458	0.153201	0.0682047	0.180189
KWT	0.0742901	0.0738247	0.0147133	0.056544	0.0948384	0.0492632	0.110754
UGA	0.116179	0.115035	0.0226375	0.090474	0.147908	0.0745415	0.177105
KHM	0.100594	0.0973238	0.0212228	0.0750924	0.129594	0.0626572	0.169422
COD	0.123572	0.123992	0.0261037	0.0936598	0.152852	0.0661092	0.212575
QAT	0.0784338	0.0767186	0.0193976	0.0570229	0.105368	0.0430529	0.158201
BGD	0.105515	0.103473	0.0201255	0.0765089	0.130309	0.066485	0.158128
GRC	0.114714	0.111691	0.0283272	0.0870668	0.145876	0.0661736	0.274163
IND	0.11702	0.115657	0.0264957	0.0858414	0.150273	0.0609512	0.213452
MDA	0.11641	0.113537	0.0236991	0.090623	0.144945	0.0639401	0.202578
GAB	0.126851	0.126533	0.0257855	0.0946376	0.155169	0.0678347	0.229122
MWI	0.107632	0.103654	0.0225641	0.0810562	0.138696	0.0647433	0.180867
EGY	0.100675	0.0984898	0.0198238	0.0756877	0.128101	0.0588381	0.161088
MNE	0.132983	0.129127	0.0291993	0.103471	0.165691	0.0740277	0.254764
ZAF	0.0893193	0.0884309	0.0193117	0.0670955	0.117119	0.0476527	0.141895
MKD	0.129787	0.12289	0.0286729	0.101965	0.172735	0.0857776	0.239627
BHS	0.100564	0.0969035	0.0204394	0.0762885	0.130402	0.0565464	0.146512
ZWE	0.109272	0.110137	0.0199431	0.084149	0.135831	0.0656861	0.153653
IRL	0.101594	0.101141	0.0232658	0.0769762	0.126226	0.0660332	0.20199
LKA	0.115205	0.111223	0.0248337	0.0865176	0.148495	0.0537823	0.173039
SRB	0.128021	0.12549	0.0274174	0.0992825	0.166685	0.0676378	0.206374
COG	0.129537	0.125468	0.026099	0.098952	0.169149	0.0807732	0.202105
NZL	0.0988962	0.0955039	0.0173142	0.0799327	0.123086	0.0637682	0.149418
LVA	0.10095	0.0973917	0.0221833	0.0757282	0.126581	0.0636221	0.183923
AUS	0.0985848	0.0955224	0.0175212	0.0758539	0.120348	0.0600757	0.151336
FLK	0.162864	0.158645	0.0358721	0.119371	0.213684	0.0934935	0.268881
ISR	0.0894941	0.0878092	0.018995	0.0662251	0.115183	0.0543092	0.144762
COL	0.103873	0.103487	0.0215389	0.0752702	0.131976	0.056482	0.172156
FIN	0.168383	0.160386	0.03706	0.12745	0.224732	0.096231	0.262116
GMB	0.0930304	0.0911912	0.0197194	0.0718027	0.117204	0.0523358	0.175709
PRT	0.0985795	0.0971583	0.0163704	0.0785832	0.117897	0.0621716	0.148943
SAU	0.0931009	0.0921134	0.0183914	0.0696146	0.11645	0.0563879	0.146479
PNG	0.107132	0.103704	0.0207112	0.0828953	0.135971	0.0696675	0.17643
JAM	0.105238	0.102454	0.0247576	0.0775152	0.134577	0.0638014	0.195274
PAK	0.114204	0.108734	0.0237003	0.0853386	0.150266	0.0623945	0.191504
ZMB	0.105798	0.102553	0.0186114	0.0841206	0.135317	0.0666449	0.154409
CHN	0.0778255	0.0765555	0.0170149	0.057244	0.10168	0.0432982	0.118579
KAZ	0.101572	0.100792	0.0214448	0.0757907	0.125151	0.0552438	0.19604
ARM	0.11177	0.10944	0.023623	0.0803025	0.144882	0.0630752	0.181875
LUX	0.109791	0.109143	0.0222921	0.0839007	0.13994	0.060496	0.179126
ALB	0.130693	0.12831	0.0288234	0.096612	0.171856	0.0725404	0.216454
HND	0.111583	0.106895	0.0264845	0.0828336	0.146067	0.0687619	0.194678
NIC	0.107081	0.104774	0.0253699	0.0768342	0.137476	0.0583251	0.191218
NER	0.100465	0.0955283	0.0229375	0.0749546	0.128841	0.05694	0.188766
ETH	0.117195	0.116448	0.0229271	0.090851	0.147156	0.0737451	0.183761
GRL	0.166194	0.155238	0.0446233	0.115129	0.221152	0.0966747	0.311416
OMN	0.093664	0.0942153	0.0175618	0.0735249	0.116496	0.0478377	0.152772
ESP	0.110773	0.110478	0.0226591	0.0808084	0.140977	0.0636607	0.17167
TJK	0.112628	0.110413	0.0244183	0.0856413	0.139755	0.072176	0.221432
YEM	0.129018	0.12566	0.0297861	0.0922447	0.170301	0.0767214	0.212324
THA	0.0941753	0.0903814	0.0229317	0.0700855	0.122104	0.0570161	0.207362
UZB	0.10341	0.0982767	0.0202323	0.0817784	0.13436	0.0658109	0.170044
DZA	0.0880894	0.0856242	0.0172437	0.0684485	0.112618	0.0496516	0.151573
FRA	0.10242	0.0972816	0.0183304	0.0834177	0.126035	0.0668383	0.157892
CRI	0.113691	0.109947	0.0252218	0.0857994	0.145723	0.0673459	0.191866
AUT	0.0960861	0.0936325	0.0206519	0.0716905	0.121299	0.0439876	0.164239
GHA	0.128846	0.122447	0.0295941	0.0993379	0.163755	0.0694126	0.230581
MEX	0.0958382	0.0946713	0.0195304	0.0723631	0.116584	0.0624036	0.164358
HTI	0.118983	0.114723	0.0266393	0.0887137	0.156945	0.0723994	0.212249
JPN	0.168682	0.160523	0.0366023	0.128693	0.217865	0.0986058	0.293176
NPL	0.105205	0.106106	0.0219619	0.0775629	0.132582	0.051235	0.163451
BGR	0.110251	0.107369	0.0229761	0.0825155	0.137812	0.0596897	0.198216
DNK	0.0958803	0.0948805	0.0189825	0.0740911	0.125468	0.0618587	0.145817
MMR	0.124479	0.122331	0.0240047	0.0955115	0.15735	0.0687071	0.191181
SWZ	0.0969522	0.0948714	0.0193345	0.0751157	0.119482	0.0579492	0.156522
CYP	0.117793	0.11553	0.0276513	0.0848938	0.150543	0.0726174	0.25425
ROU	0.117019	0.112825	0.0226331	0.0902388	0.146674	0.076907	0.187565
DOM	0.106544	0.102709	0.0265606	0.0774059	0.135023	0.0634054	0.208406
BRA	0.0997409	0.094894	0.0236248	0.0772589	0.126436	0.0549605	0.19886
ITA	0.109216	0.104279	0.0227863	0.0845845	0.136985	0.0624399	0.201082
SYR	0.122264	0.121067	0.024315	0.0901703	0.152951	0.0676787	0.192416
CHL	0.0822087	0.0812859	0.0171388	0.0619199	0.103159	0.0426237	0.159241
BEL	0.105077	0.102227	0.0183337	0.0846012	0.132672	0.0702769	0.160606
EST	0.0974549	0.0947493	0.0206735	0.0743581	0.124718	0.0569794	0.145799
LBN	0.151488	0.14874	0.0269016	0.118898	0.186083	0.0852953	0.228208
GIN	0.127782	0.121332	0.0285041	0.0960115	0.170603	0.0748427	0.210389
BRN	0.0997973	0.0996473	0.0197961	0.0738973	0.127084	0.0627423	0.14482
MNG	0.0930438	0.0896226	0.0203475	0.0691366	0.121146	0.0557013	0.143216
PRY	0.0930058	0.0879849	0.0209819	0.0707455	0.123913	0.0527133	0.151249
USA	0.0887788	0.0874163	0.0187555	0.0653663	0.111778	0.0531401	0.152631
RWA	0.112458	0.109467	0.0245547	0.0840266	0.14744	0.0677504	0.175917
PRK	0.112514	0.11087	0.0214724	0.087433	0.141227	0.0745646	0.174673
NGA	0.108971	0.109086	0.0223684	0.0842783	0.140633	0.0661867	0.168081
BWA	0.0851262	0.0822772	0.0179764	0.0671415	0.111574	0.0498495	0.133975
NOR	0.138035	0.137755	0.0247746	0.108639	0.170398	0.0813886	0.199819
BIH	0.141243	0.140128	0.0303428	0.105742	0.177826	0.0793262	0.257012
BOL	0.130748	0.124116	0.0281796	0.0992259	0.166757	0.0881166	0.25848
AZE	0.112765	0.107819	0.0251233	0.0874298	0.144777	0.0722216	0.205874
BLR	0.149185	0.146737	0.0292419	0.115661	0.181844	0.0885282	0.237311
KOR	0.0986538	0.0976735	0.0158182	0.0790317	0.119621	0.0663559	0.144457
RUS	0.107622	0.104219	0.0271406	0.0788426	0.141497	0.0609885	0.207474
PER	0.109634	0.106237	0.0257117	0.0802523	0.14795	0.0547562	0.207271
VNM	0.096448	0.0951768	0.0200363	0.0724669	0.120634	0.0596142	0.169735
PSE	0.124642	0.123214	0.0234383	0.0952349	0.151498	0.0713432	0.183424
TUN	0.104252	0.1014	0.0222758	0.0798709	0.134082	0.0657749	0.17018
NLD	0.099969	0.100227	0.0195244	0.0778587	0.119761	0.0661772	0.176492
GTM	0.115444	0.109968	0.0270947	0.0883559	0.148326	0.0779303	0.212105
URY	0.0843626	0.0823649	0.0177845	0.0645167	0.103398	0.0494091	0.144966
HRV	0.111031	0.105932	0.0231764	0.085579	0.141309	0.0688124	0.199529
IDN	0.09872	0.0970818	0.0175555	0.0766253	0.117784	0.0717321	0.158808
LAO	0.112877	0.113148	0.0220681	0.0842512	0.13957	0.0669145	0.19003
GUY	0.111893	0.108977	0.0260575	0.082083	0.14603	0.0590474	0.185418
SLB	0.105544	0.104055	0.0199296	0.0799886	0.128659	0.0569796	0.164698
ISL	0.187001	0.181727	0.0419557	0.132454	0.243043	0.104498	0.297167
MOZ	0.114679	0.113835	0.0257551	0.0837172	0.147212	0.0608122	0.186632
MLI	0.0985691	0.0952301	0.0224012	0.0702159	0.122926	0.0553896	0.173278
PHL	0.0916038	0.0898901	0.0183006	0.0675191	0.119366	0.0532207	0.143628
CAN	0.0983653	0.0938135	0.0198074	0.0765536	0.130607	0.0711099	0.154887
CMR	0.121878	0.120406	0.0230479	0.0952466	0.148765	0.0776575	0.220554
FJI	0.101784	0.101475	0.0223401	0.0731221	0.13379	0.0665318	0.169114
CIV	0.113677	0.108324	0.0257066	0.0858284	0.147597	0.0750289	0.202857
TUR	0.141642	0.140241	0.0291262	0.107763	0.187067	0.0824409	0.237387
LBR	0.128687	0.122912	0.0289462	0.0966283	0.164761	0.0681552	0.259259
BEN	0.0990586	0.097444	0.0212273	0.0737847	0.126616	0.0608663	0.178284

## Sheet: Stats_DAC
	mean	median	std	p10	p90	min	max
CHE	0.309566	0.307037	0.0645202	0.233267	0.378893	0.168301	0.543963
SLV	0.240606	0.236624	0.0554289	0.165979	0.322561	0.101362	0.361934
ARG	0.209757	0.19784	0.0623795	0.138209	0.283462	0.0901868	0.458528
PAN	0.212689	0.208992	0.0534516	0.150832	0.288419	0.0965213	0.333658
UKR	0.237357	0.223588	0.065907	0.172998	0.320293	0.142464	0.504448
GEO	0.210261	0.204631	0.0527528	0.144142	0.283639	0.106189	0.334195
CUB	0.202739	0.201178	0.0471832	0.145406	0.262879	0.130317	0.380635
ECU	0.24347	0.233867	0.0560336	0.184673	0.314754	0.135518	0.447218
DEU	0.203599	0.196822	0.050651	0.141136	0.272766	0.0941186	0.334301
BFA	0.183799	0.181587	0.0451639	0.13409	0.231412	0.0860071	0.386972
MDG	0.183812	0.17498	0.047791	0.126864	0.250235	0.0842667	0.341145
KGZ	0.214964	0.209638	0.0589164	0.153595	0.287354	0.0998638	0.448154
IRQ	0.176293	0.162689	0.0521212	0.121258	0.243891	0.0856629	0.409015
SOM	0.173357	0.163255	0.0488801	0.11961	0.250232	0.0989576	0.303724
NAM	0.174946	0.17015	0.0454279	0.125071	0.231864	0.0776786	0.321154
ARE	0.161755	0.156964	0.0328828	0.127306	0.199907	0.102041	0.265859
HUN	0.208787	0.205648	0.0552938	0.139622	0.277399	0.0962733	0.412884
SEN	0.173291	0.168134	0.0505776	0.116499	0.247499	0.0714906	0.335585
LBY	0.150664	0.144524	0.0375326	0.109656	0.206022	0.0840968	0.241955
SDN	0.149103	0.144356	0.0388452	0.104227	0.192868	0.0822186	0.334523
MYS	0.20684	0.200961	0.0504535	0.149057	0.275143	0.101603	0.381667
SUR	0.240743	0.220705	0.0704187	0.176186	0.325703	0.107389	0.521682
BLZ	0.240765	0.231537	0.0560945	0.175251	0.312875	0.133889	0.417913
SVN	0.245677	0.23448	0.0576479	0.177815	0.328342	0.147423	0.416759
CZE	0.200931	0.193778	0.0490908	0.144357	0.26721	0.117974	0.370882
IRN	0.176685	0.172884	0.0468818	0.120762	0.235985	0.103129	0.344328
SLE	0.233285	0.224169	0.0659783	0.167791	0.327275	0.142765	0.506816
JOR	0.167274	0.158074	0.0479922	0.115621	0.224933	0.0887124	0.342118
LTU	0.198511	0.184414	0.0506612	0.140834	0.266287	0.109869	0.36417
SWE	0.188096	0.186541	0.0461209	0.134658	0.24268	0.0964491	0.360198
POL	0.201175	0.200348	0.0436168	0.149761	0.246481	0.07275	0.341425
TZA	0.191368	0.192245	0.0514554	0.129534	0.266042	0.101049	0.353422
VEN	0.286823	0.279449	0.0714283	0.195587	0.401728	0.164898	0.500024
KEN	0.185514	0.179704	0.0515069	0.120718	0.260828	0.0934054	0.319028
SVK	0.217926	0.210181	0.0604921	0.153359	0.287449	0.113244	0.544799
GBR	0.196696	0.187721	0.0504264	0.144954	0.24813	0.129471	0.406122
MAR	0.15667	0.15298	0.0407006	0.108654	0.200234	0.0691471	0.307362
AGO	0.22099	0.219432	0.0576345	0.146297	0.29768	0.110097	0.38555
KWT	0.142729	0.136767	0.0311645	0.108858	0.187521	0.0882585	0.254204
UGA	0.238122	0.224439	0.0734541	0.160379	0.336204	0.0854917	0.442245
KHM	0.189157	0.184029	0.0479394	0.135116	0.253326	0.0885998	0.351804
COD	0.231151	0.229352	0.0593296	0.159218	0.314556	0.112678	0.384909
QAT	0.146463	0.138893	0.0369825	0.102255	0.196299	0.0661634	0.253024
BGD	0.195463	0.182977	0.0544239	0.14381	0.282484	0.100603	0.335131
GRC	0.221215	0.214368	0.0498434	0.16443	0.279996	0.130673	0.404199
IND	0.230446	0.218746	0.067139	0.160547	0.311367	0.113817	0.487689
MDA	0.215588	0.21249	0.0466742	0.160166	0.267583	0.113537	0.364344
GAB	0.236298	0.228909	0.0562268	0.170818	0.327289	0.135136	0.364335
MWI	0.178441	0.173627	0.0499421	0.11693	0.24055	0.0893562	0.330288
EGY	0.168726	0.165848	0.0405985	0.117165	0.220048	0.0790503	0.294414
MNE	0.271119	0.267825	0.0605248	0.194783	0.349302	0.143239	0.464684
ZAF	0.170055	0.165607	0.0398387	0.123801	0.226627	0.0817091	0.289987
MKD	0.257672	0.247824	0.0623452	0.190707	0.328176	0.127828	0.488828
BHS	0.176983	0.169671	0.040632	0.129623	0.233086	0.10624	0.339079
ZWE	0.196752	0.188369	0.0550223	0.132694	0.273863	0.096878	0.356317
IRL	0.207787	0.200871	0.0480185	0.151198	0.274183	0.130329	0.342493
LKA	0.188931	0.178246	0.0518753	0.124932	0.254371	0.0951987	0.373594
SRB	0.267005	0.258053	0.0815199	0.174246	0.362931	0.126401	0.544302
COG	0.245878	0.239026	0.0678373	0.169579	0.331234	0.130968	0.502388
NZL	0.193594	0.18987	0.0396573	0.146363	0.248434	0.118686	0.294841
LVA	0.202503	0.197202	0.0551057	0.133861	0.284009	0.0917567	0.351097
AUS	0.197572	0.18823	0.0446808	0.152328	0.260949	0.105976	0.331212
FLK	0.350283	0.335214	0.098982	0.246395	0.487163	0.173662	0.660468
ISR	0.160535	0.157895	0.0398511	0.116594	0.203739	0.0891836	0.318746
COL	0.211044	0.198595	0.0548821	0.150144	0.286886	0.108761	0.413107
FIN	0.36417	0.34696	0.0906315	0.243483	0.47974	0.181818	0.603159
GMB	0.170722	0.168008	0.0423983	0.12133	0.233346	0.0763718	0.268281
PRT	0.204339	0.19603	0.0481974	0.1526	0.282502	0.123511	0.349721
SAU	0.181136	0.175238	0.0414946	0.132584	0.244398	0.11116	0.313678
PNG	0.214245	0.207036	0.0559094	0.153881	0.273425	0.134037	0.416897
JAM	0.198691	0.191288	0.0503525	0.14547	0.270748	0.100095	0.358733
PAK	0.19508	0.191707	0.048735	0.140353	0.257113	0.103697	0.342686
ZMB	0.199943	0.18805	0.0540835	0.137924	0.278298	0.0910887	0.371661
CHN	0.15587	0.147605	0.0424754	0.11222	0.205799	0.086979	0.343825
KAZ	0.204229	0.19456	0.0551154	0.14463	0.282257	0.0990806	0.374678
ARM	0.2158	0.214692	0.056489	0.148638	0.289712	0.0899274	0.357426
LUX	0.212358	0.206782	0.0498964	0.156784	0.271865	0.109167	0.377783
ALB	0.261788	0.251263	0.0664346	0.186698	0.353384	0.136318	0.49152
HND	0.215975	0.212071	0.0571106	0.154803	0.283248	0.11184	0.422958
NIC	0.195982	0.19176	0.0461528	0.142225	0.258837	0.0985639	0.358507
NER	0.166353	0.158915	0.0489267	0.106322	0.224525	0.0829981	0.358393
ETH	0.211697	0.206894	0.0458908	0.150654	0.261716	0.115745	0.355959
GRL	0.376913	0.361999	0.0964078	0.25592	0.528044	0.214677	0.582753
OMN	0.181982	0.177832	0.0485074	0.129359	0.249301	0.105909	0.403854
ESP	0.213867	0.207252	0.0529215	0.154971	0.266918	0.118853	0.449846
TJK	0.210873	0.205137	0.0498191	0.159374	0.281326	0.11516	0.355613
YEM	0.222563	0.218469	0.0552555	0.163754	0.285465	0.112516	0.460704
THA	0.183583	0.178688	0.0437395	0.134688	0.253612	0.108692	0.292666
UZB	0.205208	0.191086	0.0586148	0.139804	0.292548	0.118285	0.363335
DZA	0.166106	0.160503	0.0405595	0.11658	0.226079	0.0628065	0.272138
FRA	0.202779	0.196377	0.0528597	0.142534	0.268965	0.120902	0.387368
CRI	0.219216	0.217666	0.0570954	0.153936	0.288223	0.102987	0.400392
AUT	0.182147	0.173104	0.0442411	0.131871	0.234694	0.0981567	0.319495
GHA	0.238137	0.230676	0.0657643	0.153652	0.329131	0.114947	0.436004
MEX	0.191056	0.186052	0.0551014	0.128998	0.252504	0.0829936	0.40379
HTI	0.188916	0.175461	0.0477452	0.136516	0.253868	0.116954	0.367962
JPN	0.367981	0.365822	0.0905687	0.249968	0.48336	0.195522	0.672943
NPL	0.198372	0.196935	0.0437062	0.144697	0.260998	0.106734	0.30739
BGR	0.222493	0.218069	0.057974	0.156039	0.297208	0.130728	0.394771
DNK	0.186222	0.179179	0.0445626	0.137778	0.239381	0.112521	0.355588
MMR	0.215666	0.195511	0.0652573	0.150746	0.27288	0.130118	0.480949
SWZ	0.177084	0.18053	0.0442458	0.120548	0.229766	0.0938164	0.341182
CYP	0.249046	0.238415	0.0606516	0.171872	0.336933	0.13835	0.400154
ROU	0.227419	0.221458	0.0604892	0.153868	0.294521	0.112045	0.489149
DOM	0.204683	0.199673	0.0481717	0.149192	0.266126	0.110389	0.352636
BRA	0.206284	0.200625	0.055223	0.139046	0.283664	0.115658	0.430019
ITA	0.219248	0.204545	0.0616832	0.156711	0.309795	0.111599	0.429857
SYR	0.163778	0.158669	0.0438977	0.117526	0.215973	0.0833824	0.351015
CHL	0.161496	0.153067	0.0431085	0.109531	0.213103	0.0899326	0.291768
BEL	0.210707	0.202849	0.0512339	0.160173	0.255098	0.110729	0.412644
EST	0.198966	0.198655	0.0442048	0.13997	0.251918	0.101105	0.333829
LBN	0.234527	0.223115	0.0662915	0.165658	0.329842	0.133225	0.479535
GIN	0.235352	0.229214	0.0587776	0.172815	0.318195	0.1046	0.421355
BRN	0.199916	0.185811	0.0546819	0.140665	0.270111	0.106268	0.400386
MNG	0.164791	0.155633	0.0448863	0.115391	0.219335	0.102719	0.299548
PRY	0.180774	0.169842	0.0449065	0.13038	0.245734	0.0970638	0.37756
USA	0.171765	0.173613	0.0372298	0.120341	0.220575	0.0962705	0.2501
RWA	0.23327	0.223697	0.0645351	0.156222	0.324654	0.110792	0.396636
PRK	0.184128	0.175176	0.0466526	0.13223	0.243843	0.101769	0.355775
NGA	0.190443	0.182576	0.0596966	0.119611	0.2676	0.0836447	0.430553
BWA	0.171393	0.16001	0.048215	0.122039	0.245343	0.0928906	0.320429
NOR	0.293853	0.279899	0.0720691	0.212733	0.393628	0.169506	0.546339
BIH	0.29544	0.290312	0.0719866	0.203419	0.405897	0.13687	0.465117
BOL	0.22868	0.219775	0.0594812	0.164458	0.305633	0.124825	0.507415
AZE	0.244623	0.223605	0.0752628	0.163673	0.345382	0.130303	0.53184
BLR	0.239799	0.231661	0.0577339	0.174967	0.311903	0.14175	0.392256
KOR	0.200063	0.194964	0.0480031	0.146859	0.247357	0.127902	0.429682
RUS	0.215354	0.211531	0.0537586	0.153983	0.276719	0.112382	0.371255
PER	0.228469	0.222809	0.0672801	0.154437	0.293802	0.104743	0.570955
VNM	0.180223	0.170338	0.0474539	0.127237	0.245001	0.0983368	0.325094
PSE	0.176305	0.17296	0.0432815	0.119254	0.239782	0.0910199	0.296905
TUN	0.178542	0.166828	0.0422773	0.131529	0.234577	0.101685	0.292535
NLD	0.199058	0.197993	0.0410911	0.157238	0.246105	0.111454	0.363704
GTM	0.234235	0.220324	0.0650857	0.163261	0.299634	0.117415	0.542007
URY	0.152956	0.150334	0.0404525	0.108122	0.201769	0.0780955	0.29539
HRV	0.235456	0.221764	0.074566	0.162047	0.315681	0.125554	0.568348
IDN	0.206542	0.197214	0.0596186	0.139974	0.289321	0.116797	0.450249
LAO	0.19861	0.189204	0.051198	0.145208	0.266704	0.0912788	0.350494
GUY	0.231957	0.226525	0.0643681	0.154787	0.319898	0.105452	0.430754
SLB	0.184031	0.18401	0.0452247	0.128283	0.239192	0.0879541	0.325225
ISL	0.403179	0.395688	0.084353	0.298863	0.500547	0.257825	0.683876
MOZ	0.201404	0.19584	0.0549892	0.14005	0.285048	0.102546	0.358302
MLI	0.164883	0.158841	0.0430778	0.114304	0.224988	0.0697189	0.298768
PHL	0.182844	0.173544	0.054563	0.119247	0.251953	0.0901752	0.370379
CAN	0.187157	0.177246	0.0429598	0.138172	0.250821	0.117011	0.323851
CMR	0.239466	0.224825	0.0679065	0.163607	0.333609	0.12653	0.46756
FJI	0.190168	0.179202	0.0466881	0.137636	0.253047	0.122734	0.329909
CIV	0.220092	0.205412	0.057953	0.160875	0.306469	0.120192	0.38838
TUR	0.294577	0.2859	0.0772966	0.21265	0.401528	0.155325	0.580509
LBR	0.227918	0.22752	0.0520717	0.161112	0.301092	0.121794	0.37631
BEN	0.19795	0.197147	0.0543434	0.133379	0.268458	0.0946099	0.325294

## Sheet: Stats_AD
	mean	median	std	p10	p90	min	max
CHE	0.120465	0.119067	0.0140747	0.104071	0.137956	0.0924365	0.174152
SLV	0.0958946	0.0954422	0.0101307	0.0830883	0.107854	0.0748437	0.127208
ARG	0.0857742	0.0825985	0.0141797	0.0700497	0.105133	0.0583355	0.130011
PAN	0.086475	0.086577	0.00792684	0.0766798	0.0974624	0.0707329	0.107454
UKR	0.11487	0.113237	0.0145395	0.0980316	0.135379	0.0911527	0.159278
GEO	0.079094	0.0783589	0.00860553	0.0695067	0.0893321	0.0604378	0.112461
CUB	0.105963	0.105357	0.0136007	0.0888763	0.124387	0.0817031	0.143075
ECU	0.0880656	0.0861988	0.0115852	0.0748673	0.102959	0.0613045	0.118903
DEU	0.119165	0.117469	0.0120859	0.104807	0.13652	0.0937447	0.15717
BFA	0.0726509	0.0718575	0.00973023	0.0620569	0.0843676	0.0541247	0.107226
MDG	0.0664666	0.0647453	0.00764488	0.0571642	0.0777049	0.0533886	0.0841384
KGZ	0.0873991	0.0854677	0.0106532	0.0759983	0.103664	0.0639934	0.119248
IRQ	0.0927077	0.0915808	0.0103053	0.0807266	0.105547	0.0749446	0.120585
SOM	0.0827242	0.0819078	0.0115703	0.066826	0.0957656	0.0573624	0.12028
NAM	0.069752	0.0676919	0.00818172	0.061237	0.081858	0.0529871	0.0913471
ARE	0.0844742	0.0835468	0.00771401	0.0762349	0.0943392	0.0654911	0.105895
HUN	0.091837	0.0901499	0.00905848	0.0815871	0.104047	0.0716989	0.120055
SEN	0.0520402	0.0511426	0.0069098	0.0443979	0.0626023	0.038843	0.0712768
LBY	0.0625489	0.0620928	0.00683267	0.0551499	0.0739704	0.0501387	0.0801377
SDN	0.0912503	0.0879838	0.0152953	0.0730396	0.112516	0.0627573	0.14511
MYS	0.0590596	0.0587397	0.00706164	0.0508404	0.067687	0.0430713	0.0854893
SUR	0.074322	0.072461	0.010525	0.0640156	0.0851932	0.050648	0.11887
BLZ	0.0995228	0.0990825	0.0115294	0.0862263	0.113805	0.0764943	0.135941
SVN	0.113671	0.111714	0.0116385	0.0996245	0.129307	0.0915073	0.144249
CZE	0.0811763	0.0801181	0.00829165	0.0714706	0.0929248	0.0588616	0.10199
IRN	0.0873169	0.086572	0.0100859	0.0760782	0.0991333	0.0684893	0.121337
SLE	0.0767456	0.0768109	0.011282	0.0635509	0.0919979	0.0574598	0.115782
JOR	0.0849336	0.0838323	0.00787199	0.0767822	0.0947067	0.0676088	0.10482
LTU	0.0940464	0.0944243	0.00884766	0.0830946	0.104321	0.0773905	0.118075
SWE	0.086523	0.0851743	0.00933828	0.076576	0.0999444	0.0688944	0.118453
POL	0.0986307	0.0974893	0.0107794	0.0859165	0.114206	0.0754622	0.128097
TZA	0.0670825	0.0662754	0.00763672	0.0582633	0.0774365	0.0487878	0.0885782
VEN	0.105443	0.101978	0.0152515	0.0873876	0.122353	0.0720066	0.155664
KEN	0.104257	0.103474	0.0102705	0.091744	0.116208	0.0823297	0.13089
SVK	0.102991	0.1025	0.00959802	0.091694	0.116609	0.0840253	0.128488
GBR	0.130383	0.128652	0.0123859	0.116019	0.147133	0.10815	0.164622
MAR	0.0668541	0.0653304	0.00701474	0.0585965	0.0766459	0.0537323	0.0862046
AGO	0.0727691	0.07051	0.0101405	0.0615761	0.0860559	0.0550556	0.108657
KWT	0.0740087	0.0735925	0.00694156	0.0650205	0.0827355	0.0581875	0.0954979
UGA	0.0603984	0.0601488	0.00839289	0.0497686	0.0712376	0.041457	0.0839464
KHM	0.0807801	0.079618	0.00899667	0.0709522	0.093491	0.0611575	0.114194
COD	0.0891586	0.0883838	0.0102956	0.0764781	0.102508	0.0688106	0.12614
QAT	0.0717932	0.0713446	0.00633805	0.0634567	0.0788475	0.0587157	0.089468
BGD	0.0865846	0.0869356	0.00936216	0.0754516	0.100296	0.067348	0.114609
GRC	0.106525	0.103946	0.0110034	0.0927972	0.121611	0.0833353	0.142594
IND	0.0663395	0.0664353	0.0078435	0.0555325	0.077003	0.0513998	0.0932246
MDA	0.0942014	0.093145	0.010489	0.0820019	0.106741	0.0716783	0.12796
GAB	0.0902187	0.0908632	0.0104984	0.0779591	0.104271	0.0625297	0.118409
MWI	0.0746104	0.0745656	0.00994741	0.0609912	0.0881792	0.0565588	0.101439
EGY	0.0712154	0.0698699	0.0101286	0.0596772	0.0873891	0.0519188	0.0984524
MNE	0.0978925	0.097237	0.0110806	0.0857641	0.113015	0.0719782	0.129145
ZAF	0.0674996	0.0661485	0.00797459	0.0584909	0.0775402	0.0518237	0.088139
MKD	0.0937381	0.0925337	0.00995041	0.082293	0.106144	0.0707377	0.122356
BHS	0.0894041	0.0881278	0.00977303	0.078003	0.103387	0.0692568	0.118223
ZWE	0.0775527	0.077598	0.00928949	0.0667626	0.0904306	0.0574482	0.10316
IRL	0.119771	0.118835	0.0108877	0.106839	0.134577	0.0968712	0.151936
LKA	0.09718	0.0955003	0.0118656	0.0832759	0.113824	0.076851	0.132083
SRB	0.0957764	0.0931007	0.010911	0.0824066	0.111201	0.074653	0.123392
COG	0.082458	0.0818552	0.0101731	0.0694286	0.0939737	0.0627322	0.1107
NZL	0.0994501	0.0974214	0.0101719	0.088524	0.114095	0.0811578	0.125498
LVA	0.100824	0.0994223	0.0100866	0.088688	0.1135	0.081451	0.12698
AUS	0.100792	0.098658	0.0113414	0.0888055	0.115106	0.0757691	0.131243
FLK	0.0973332	0.0970478	0.010202	0.0839664	0.108562	0.0691154	0.134042
ISR	0.0884106	0.0884622	0.00856486	0.0783862	0.100566	0.0705704	0.118328
COL	0.0663984	0.0659236	0.00706023	0.058646	0.0753836	0.0497811	0.0919456
FIN	0.114035	0.112873	0.0110677	0.102023	0.129217	0.0936023	0.150806
GMB	0.0633787	0.0630995	0.00778737	0.0542526	0.0730191	0.0431202	0.0844213
PRT	0.105509	0.104834	0.00955951	0.0947197	0.117868	0.0849077	0.132487
SAU	0.0947583	0.0931142	0.00935557	0.0841214	0.10926	0.0734493	0.11797
PNG	0.0853694	0.0844738	0.00920814	0.0740306	0.0963274	0.0654548	0.111956
JAM	0.0870969	0.0861052	0.00885147	0.0769523	0.100028	0.0694531	0.112378
PAK	0.0953619	0.0943587	0.0114655	0.081807	0.110564	0.069272	0.12148
ZMB	0.0759172	0.0735518	0.0102382	0.064434	0.0895981	0.0586852	0.110108
CHN	0.0544768	0.0538597	0.00585617	0.0468197	0.0620414	0.0425783	0.0738473
KAZ	0.0807387	0.0803243	0.00787696	0.0700176	0.0904272	0.0636426	0.101916
ARM	0.0854136	0.0845544	0.00992877	0.0745585	0.0971092	0.0675553	0.125855
LUX	0.118359	0.116171	0.0123426	0.105607	0.134316	0.0924186	0.154654
ALB	0.0911855	0.0880147	0.0101539	0.0797048	0.10595	0.0752259	0.121349
HND	0.091486	0.0892801	0.00905075	0.0819956	0.101822	0.0731162	0.119486
NIC	0.0648553	0.0639062	0.0089232	0.0546608	0.0762302	0.0454374	0.0880504
NER	0.0743325	0.0738568	0.00839247	0.0637402	0.0859452	0.055412	0.09046
ETH	0.0864811	0.0847874	0.0121613	0.0715864	0.102937	0.0614737	0.123938
GRL	0.0963563	0.0942123	0.00954194	0.0857402	0.110446	0.0789528	0.127749
OMN	0.0933623	0.0914019	0.00992778	0.0821006	0.1085	0.069223	0.117804
ESP	0.123882	0.12164	0.0121852	0.110547	0.139721	0.098259	0.167629
TJK	0.0854353	0.0852565	0.0102164	0.0729621	0.0984711	0.0671096	0.119572
YEM	0.105512	0.103577	0.0136447	0.0907716	0.122432	0.0775883	0.146602
THA	0.0576945	0.0565165	0.0074187	0.0494277	0.0664663	0.0421694	0.0852452
UZB	0.0820151	0.0811769	0.00833318	0.0724268	0.0939318	0.0634519	0.103957
DZA	0.0659741	0.0650356	0.00746734	0.0585466	0.075324	0.0496417	0.0901469
FRA	0.131277	0.12999	0.0107329	0.120239	0.14638	0.107947	0.159314
CRI	0.0915759	0.0911219	0.0089709	0.0818743	0.101806	0.0704426	0.118029
AUT	0.102851	0.101961	0.00846419	0.091988	0.113465	0.0821337	0.132702
GHA	0.0844606	0.0838118	0.0089821	0.0733098	0.0963565	0.0674131	0.102152
MEX	0.0593831	0.0586129	0.00648996	0.0506802	0.0682804	0.0465836	0.0737356
HTI	0.0965486	0.097114	0.0118353	0.0813183	0.111192	0.0726246	0.128795
JPN	0.154493	0.15379	0.0139082	0.135072	0.170384	0.126152	0.190226
NPL	0.0843941	0.0831957	0.00898606	0.0740085	0.0978733	0.0686403	0.107295
BGR	0.101698	0.10029	0.00921357	0.0910173	0.114641	0.0861515	0.130329
DNK	0.129204	0.128476	0.0107973	0.117019	0.143015	0.103898	0.15947
MMR	0.0946337	0.092931	0.0112027	0.0824932	0.110447	0.0726196	0.129233
SWZ	0.0659254	0.0652511	0.00780755	0.0570633	0.0742011	0.047013	0.0908406
CYP	0.108804	0.106932	0.010623	0.0978572	0.121915	0.0832713	0.146667
ROU	0.111539	0.109719	0.01141	0.0989369	0.12728	0.0890224	0.147074
DOM	0.0871662	0.0863282	0.00944019	0.0755243	0.0980261	0.0702346	0.117607
BRA	0.0642928	0.0637101	0.00770613	0.0557414	0.0735937	0.0502482	0.0942559
ITA	0.0929626	0.0919853	0.00924498	0.0814547	0.105772	0.0768889	0.119497
SYR	0.104211	0.102063	0.0154379	0.0887829	0.122397	0.0728628	0.163086
CHL	0.0636486	0.0623449	0.00697606	0.0553709	0.0731974	0.0518852	0.0880465
BEL	0.115027	0.113489	0.0124701	0.101298	0.13283	0.0882871	0.150217
EST	0.0995756	0.0982634	0.00942861	0.0891195	0.112162	0.0776333	0.12905
LBN	0.115077	0.111108	0.016851	0.0974992	0.138057	0.0850629	0.180294
GIN	0.0791097	0.0779283	0.0105222	0.0656712	0.0934952	0.0583365	0.105934
BRN	0.0828752	0.0818576	0.00862014	0.0729448	0.0942939	0.0677434	0.110225
MNG	0.086412	0.0854803	0.00967211	0.0747677	0.0983516	0.0668283	0.125625
PRY	0.0671368	0.0659786	0.00735132	0.0581593	0.0768005	0.0539334	0.0908323
USA	0.0910411	0.0890126	0.00895321	0.0804398	0.104915	0.075662	0.112613
RWA	0.0683733	0.0669291	0.00861224	0.0579375	0.0803221	0.0546921	0.0981537
PRK	0.103408	0.101639	0.0112193	0.0903299	0.119447	0.0783597	0.131566
NGA	0.0723776	0.0717276	0.00906292	0.0624979	0.081992	0.055132	0.0989714
BWA	0.0603635	0.0593214	0.00644242	0.0526261	0.0690482	0.0458679	0.0800985
NOR	0.111194	0.11067	0.0123216	0.0963675	0.129437	0.0831235	0.144344
BIH	0.0992843	0.0985093	0.0118526	0.0865293	0.116666	0.0743297	0.135671
BOL	0.088414	0.0880963	0.0121297	0.0744972	0.104029	0.0591611	0.124902
AZE	0.0873857	0.0856911	0.00883131	0.0777482	0.100122	0.0670584	0.108981
BLR	0.119825	0.116333	0.0161468	0.100862	0.141691	0.0876498	0.163472
KOR	0.0898764	0.0870506	0.0105313	0.0785598	0.104753	0.0695258	0.121826
RUS	0.0851945	0.0842294	0.00900663	0.0741531	0.0965905	0.0619194	0.114643
PER	0.0639457	0.0632501	0.00730187	0.0554182	0.0747954	0.048075	0.0830895
VNM	0.0756232	0.0740706	0.00854368	0.066082	0.0869582	0.0545962	0.106637
PSE	0.116313	0.114549	0.0168292	0.0966512	0.137324	0.0822982	0.175898
TUN	0.0770726	0.0757721	0.00962275	0.0655063	0.0894676	0.0608581	0.104094
NLD	0.111174	0.109076	0.0116006	0.097376	0.127006	0.0892287	0.145372
GTM	0.0895539	0.0882516	0.00882223	0.079149	0.10044	0.0671536	0.114765
URY	0.0620893	0.0609728	0.00664921	0.0550112	0.0710538	0.0491596	0.0835693
HRV	0.104645	0.104268	0.0100449	0.0931574	0.117085	0.0850889	0.133957
IDN	0.0774961	0.076342	0.00703733	0.0686495	0.08638	0.0631543	0.0966566
LAO	0.092585	0.0909773	0.0114661	0.0797032	0.108054	0.0679777	0.130683
GUY	0.0657254	0.0651006	0.0067244	0.0581682	0.075153	0.0527278	0.0859865
SLB	0.087792	0.0862937	0.0108571	0.0762572	0.100434	0.0675913	0.123315
ISL	0.116786	0.116039	0.0148124	0.102139	0.136052	0.0901895	0.167994
MOZ	0.0732564	0.0722821	0.00989261	0.0606956	0.0886012	0.0543082	0.0996576
MLI	0.0754282	0.0731151	0.0119186	0.0621499	0.0932672	0.0521784	0.109399
PHL	0.0701096	0.0699069	0.00709568	0.0621216	0.078296	0.0542074	0.0967585
CAN	0.107403	0.106435	0.010812	0.0944068	0.119664	0.0894222	0.144389
CMR	0.0762818	0.0735632	0.0105845	0.0651327	0.0902786	0.052056	0.106041
FJI	0.0905591	0.0899154	0.0109723	0.0775232	0.104916	0.0698623	0.127569
CIV	0.0671078	0.0668152	0.00889684	0.0567144	0.0799091	0.0512653	0.0949076
TUR	0.106401	0.104398	0.012035	0.0929658	0.123271	0.072497	0.133758
LBR	0.0787468	0.0773052	0.0125137	0.0651851	0.0941149	0.0593763	0.119715
BEN	0.06764	0.0662735	0.00814853	0.0579184	0.0789913	0.0526561	0.0914979

## Sheet: Stats_AE
	mean	median	std	p10	p90	min	max
CHE	0.110649	0.107229	0.0233905	0.0814598	0.140787	0.0640086	0.180182
SLV	0.101523	0.0982492	0.0220908	0.0769202	0.130045	0.0593472	0.159398
ARG	0.100272	0.097683	0.0208706	0.074661	0.12242	0.0676657	0.191962
PAN	0.087658	0.0832208	0.0195408	0.0686315	0.117347	0.0522302	0.151451
UKR	0.112926	0.111093	0.0237473	0.0844029	0.144709	0.0684797	0.183486
GEO	0.0913583	0.0887564	0.0228251	0.064017	0.115744	0.0529565	0.168138
CUB	0.108579	0.103629	0.0235264	0.0829076	0.14041	0.0660842	0.199156
ECU	0.109853	0.107928	0.0214431	0.0840098	0.141175	0.0751781	0.159824
DEU	0.0788894	0.0764897	0.0171484	0.059295	0.100485	0.048091	0.125347
BFA	0.0886235	0.0873174	0.0177914	0.0653371	0.112376	0.0474378	0.134419
MDG	0.0810673	0.0788268	0.0186603	0.058775	0.108781	0.0491229	0.130769
KGZ	0.09675	0.095022	0.0205819	0.0730343	0.126222	0.0504474	0.146468
IRQ	0.0840709	0.0825348	0.0173755	0.0606555	0.105386	0.0470653	0.131211
SOM	0.0889938	0.0864598	0.0184263	0.0653195	0.112472	0.0478622	0.136407
NAM	0.080868	0.0814819	0.0159984	0.0619934	0.0992153	0.0483596	0.129694
ARE	0.0701513	0.0669179	0.0139782	0.0533548	0.0907609	0.0453055	0.09848
HUN	0.0874233	0.0847718	0.0227448	0.0617894	0.115084	0.0521608	0.191021
SEN	0.0794627	0.0772563	0.0166603	0.0605442	0.0979908	0.0508993	0.136727
LBY	0.0664398	0.0664173	0.0138604	0.0496273	0.0841368	0.040403	0.109554
SDN	0.0979016	0.0949923	0.0201373	0.0756807	0.126408	0.0652251	0.150542
MYS	0.0907458	0.0864367	0.0218912	0.0656653	0.118949	0.0539656	0.161917
SUR	0.103005	0.0991669	0.0246559	0.0740465	0.135866	0.0541051	0.171879
BLZ	0.10531	0.102388	0.022519	0.0804667	0.132843	0.0664019	0.180247
SVN	0.097536	0.0942839	0.0213861	0.0743787	0.124957	0.0588546	0.163862
CZE	0.0803566	0.077859	0.0182352	0.0604546	0.103488	0.0440989	0.140354
IRN	0.0836682	0.0820447	0.0188306	0.0629291	0.102192	0.0412662	0.175872
SLE	0.106584	0.103639	0.0255987	0.077113	0.140365	0.0559311	0.182759
JOR	0.0769991	0.0755779	0.0162641	0.0588597	0.0926597	0.0399722	0.144325
LTU	0.0806572	0.0790309	0.0174166	0.0611116	0.102989	0.0521182	0.152472
SWE	0.0773612	0.0729494	0.0189385	0.0572534	0.106509	0.0433511	0.148943
POL	0.0798208	0.0780577	0.0161812	0.061047	0.0974862	0.0490088	0.14444
TZA	0.0902844	0.0882637	0.0168847	0.0700952	0.113139	0.0570711	0.136235
VEN	0.138056	0.135189	0.0281171	0.107388	0.170391	0.0795611	0.24327
KEN	0.0846553	0.0839689	0.0163814	0.0655129	0.109068	0.0487895	0.129534
SVK	0.0880421	0.08572	0.0190791	0.0664864	0.111243	0.0527443	0.138852
GBR	0.0787284	0.0760454	0.0148605	0.0621192	0.105624	0.0490515	0.117256
MAR	0.0674835	0.0653332	0.0144748	0.0513554	0.0856773	0.0442552	0.11497
AGO	0.0998817	0.0961608	0.0244113	0.0724651	0.124255	0.0576325	0.187111
KWT	0.0632386	0.0615331	0.0133354	0.04655	0.0836633	0.0387464	0.0949027
UGA	0.106825	0.105089	0.0260663	0.0774273	0.135169	0.0602122	0.236832
KHM	0.0865883	0.0807705	0.0220833	0.0650438	0.114971	0.0450475	0.172183
COD	0.105829	0.104001	0.0232513	0.0770391	0.137768	0.064304	0.163806
QAT	0.0633131	0.0638305	0.0136595	0.0449288	0.0799217	0.0341631	0.10284
BGD	0.0880427	0.0879099	0.0180498	0.0641421	0.11206	0.0551322	0.139146
GRC	0.0950012	0.0895523	0.021946	0.0717896	0.126844	0.0584073	0.163225
IND	0.0965987	0.094533	0.0214333	0.0704521	0.12674	0.0541535	0.15614
MDA	0.0963762	0.0945717	0.0187815	0.0751508	0.12089	0.0584707	0.143593
GAB	0.113447	0.11089	0.0262848	0.0844314	0.145631	0.0682346	0.224983
MWI	0.0858024	0.0850949	0.0174334	0.0641548	0.105755	0.0499385	0.136338
EGY	0.0833215	0.0817051	0.0172237	0.0627564	0.105512	0.0500887	0.128354
MNE	0.111016	0.108066	0.0229646	0.0865328	0.143485	0.0549605	0.192663
ZAF	0.0783551	0.0761085	0.0148645	0.0607099	0.101043	0.048304	0.124901
MKD	0.111594	0.104423	0.0292129	0.082543	0.146989	0.0632037	0.22638
BHS	0.080608	0.0784367	0.0162027	0.06162	0.103042	0.0468006	0.134033
ZWE	0.0926016	0.0892852	0.0216548	0.0682795	0.115669	0.053294	0.162511
IRL	0.0791355	0.0741442	0.0210078	0.0590472	0.104678	0.0480147	0.159907
LKA	0.097904	0.0970761	0.0225424	0.0706593	0.125791	0.0545065	0.184978
SRB	0.103135	0.100329	0.0246907	0.0756632	0.136501	0.0617942	0.169008
COG	0.108097	0.105493	0.0242232	0.0797114	0.140476	0.0637622	0.172956
NZL	0.0761052	0.0742386	0.0169616	0.05367	0.101197	0.0442754	0.113956
LVA	0.0824392	0.0788776	0.0206781	0.0603853	0.113204	0.0486076	0.148918
AUS	0.0750146	0.0734707	0.0160761	0.0563462	0.0950656	0.0423732	0.128319
FLK	0.138934	0.131978	0.0365143	0.0970684	0.184328	0.0617681	0.263048
ISR	0.068833	0.065914	0.0153747	0.0514072	0.0875548	0.0423764	0.137515
COL	0.0868383	0.0845894	0.0229698	0.0603009	0.116303	0.0491908	0.166274
FIN	0.14082	0.142414	0.0335265	0.0958988	0.185401	0.0653525	0.22709
GMB	0.0803889	0.0764652	0.0175888	0.0591332	0.104882	0.0522458	0.13165
PRT	0.0846818	0.0821258	0.0193234	0.0625502	0.109527	0.053731	0.169087
SAU	0.070408	0.06783	0.0141426	0.0535317	0.0894184	0.0440457	0.103486
PNG	0.0926732	0.0885887	0.0207576	0.0686837	0.122417	0.0511778	0.148721
JAM	0.0870182	0.0850596	0.0192672	0.0634807	0.106229	0.0518469	0.174083
PAK	0.0910206	0.0887874	0.0184189	0.0695672	0.116499	0.0598062	0.148948
ZMB	0.0947366	0.092177	0.0206409	0.0695583	0.11997	0.0498047	0.160586
CHN	0.0651599	0.0629933	0.0154026	0.0481684	0.0847632	0.041219	0.116646
KAZ	0.0825649	0.0798366	0.0184337	0.0611599	0.107182	0.0474704	0.157207
ARM	0.0953366	0.0914553	0.0232954	0.0695839	0.125854	0.0570329	0.192885
LUX	0.0841525	0.0817782	0.0171089	0.061874	0.107602	0.0502285	0.126213
ALB	0.106727	0.10208	0.0276408	0.0801385	0.135782	0.0591708	0.27337
HND	0.0910726	0.0876723	0.0206263	0.0683215	0.11655	0.0601413	0.155873
NIC	0.0886332	0.0874696	0.0190548	0.0661188	0.110066	0.0531256	0.158253
NER	0.0841572	0.0811407	0.0175384	0.0616163	0.104335	0.0523236	0.13769
ETH	0.100043	0.0980641	0.0215298	0.0744126	0.124897	0.0482436	0.183234
GRL	0.141297	0.132392	0.0370229	0.10136	0.191062	0.0763685	0.24872
OMN	0.0725048	0.0682408	0.016052	0.0548855	0.094448	0.047499	0.12353
ESP	0.0855292	0.0806138	0.0222108	0.0634461	0.109041	0.0538859	0.190443
TJK	0.0947178	0.0934474	0.0215076	0.066117	0.123403	0.0564769	0.160735
YEM	0.107075	0.103711	0.0227735	0.0819812	0.140366	0.0678077	0.16568
THA	0.0783746	0.0773527	0.0172052	0.0561599	0.0996722	0.0431928	0.123203
UZB	0.0841295	0.0810111	0.0191223	0.0623809	0.111989	0.0512531	0.133077
DZA	0.0711043	0.0700946	0.013739	0.0545121	0.0891035	0.0442224	0.118211
FRA	0.0795447	0.0750902	0.0165381	0.0606078	0.102047	0.0437185	0.146429
CRI	0.0932614	0.0915584	0.020057	0.066374	0.120393	0.0551576	0.147043
AUT	0.0789362	0.0766811	0.0180409	0.0595633	0.103513	0.0418339	0.134705
GHA	0.109537	0.106194	0.0248498	0.0796355	0.139947	0.055946	0.18219
MEX	0.0837778	0.0823512	0.0214852	0.0588211	0.108355	0.0453236	0.178018
HTI	0.0981521	0.0933908	0.0238261	0.0695276	0.12904	0.0541243	0.174425
JPN	0.140225	0.136659	0.0305615	0.102895	0.183099	0.0788278	0.22472
NPL	0.0875753	0.0858587	0.0192826	0.0683792	0.11163	0.0429924	0.147957
BGR	0.0945565	0.0878325	0.024948	0.0678246	0.127859	0.0469993	0.203207
DNK	0.0731408	0.0705097	0.0155611	0.0558226	0.0930854	0.0472411	0.130958
MMR	0.104196	0.100147	0.0249868	0.0782771	0.146049	0.0608489	0.19096
SWZ	0.0827036	0.0806475	0.017312	0.0614754	0.10929	0.0479998	0.124705
CYP	0.0956407	0.0967067	0.0193269	0.0707043	0.120889	0.0530817	0.146733
ROU	0.0944599	0.0941895	0.0182471	0.0726792	0.118817	0.0506595	0.138435
DOM	0.0834425	0.0821375	0.0190022	0.0604821	0.1078	0.0534683	0.137404
BRA	0.0878445	0.084467	0.020391	0.0636852	0.11562	0.0481347	0.152574
ITA	0.0892891	0.0862351	0.022848	0.0633172	0.12309	0.0532366	0.165099
SYR	0.0985116	0.0968176	0.0203472	0.0733768	0.12105	0.0560329	0.15614
CHL	0.0680286	0.064583	0.0167377	0.048496	0.0880137	0.0413738	0.130543
BEL	0.0796955	0.0783745	0.0183185	0.0580853	0.103427	0.0441817	0.142094
EST	0.0798629	0.0785177	0.0185007	0.056036	0.10175	0.043544	0.130141
LBN	0.125077	0.122934	0.0238056	0.0961367	0.149555	0.0730673	0.208437
GIN	0.104461	0.101871	0.021675	0.0785501	0.135582	0.0598438	0.158241
BRN	0.0827633	0.0802834	0.0202205	0.05882	0.11149	0.0474306	0.146352
MNG	0.0790023	0.0796195	0.0150301	0.0590046	0.0961003	0.045127	0.130598
PRY	0.0763526	0.0738686	0.0183373	0.0556155	0.101964	0.0467111	0.149142
USA	0.0731094	0.0709484	0.0175471	0.0534641	0.0993408	0.0423985	0.127356
RWA	0.0997501	0.0955493	0.023699	0.0769949	0.125052	0.0640536	0.207021
PRK	0.0993182	0.0978463	0.0197196	0.0733744	0.129477	0.0571041	0.149847
NGA	0.0901179	0.0897636	0.0196069	0.066624	0.117907	0.059895	0.155418
BWA	0.0732126	0.0695746	0.017548	0.0532531	0.0968462	0.0421187	0.1228
NOR	0.104661	0.10076	0.024927	0.0760493	0.137103	0.0610333	0.189172
BIH	0.12628	0.124552	0.026787	0.0928212	0.159808	0.0682143	0.208711
BOL	0.107764	0.104441	0.0248505	0.0802854	0.138738	0.0652222	0.183906
AZE	0.0948725	0.0929842	0.0219802	0.0700894	0.123883	0.0534827	0.185952
BLR	0.127968	0.122394	0.0310502	0.0909097	0.165024	0.081315	0.231534
KOR	0.0770349	0.0747344	0.017887	0.0569392	0.10287	0.0484477	0.130193
RUS	0.0934127	0.090765	0.0212164	0.0720759	0.120599	0.050111	0.181389
PER	0.0914196	0.0898953	0.0211521	0.0643388	0.118165	0.0541384	0.154843
VNM	0.0819076	0.0808951	0.0168948	0.0628374	0.101403	0.0492245	0.135557
PSE	0.0998961	0.0961039	0.0221175	0.0742755	0.130143	0.0631695	0.165654
TUN	0.0853959	0.0822767	0.0168122	0.0679935	0.103976	0.0517211	0.136533
NLD	0.0753468	0.0728196	0.016062	0.0564351	0.0966977	0.0462823	0.124367
GTM	0.098241	0.0969889	0.0216055	0.0737269	0.125443	0.0510616	0.166645
URY	0.0670977	0.0656275	0.01422	0.0499827	0.0836357	0.0404622	0.107432
HRV	0.0882487	0.0831088	0.0219867	0.0659268	0.115407	0.049287	0.164634
IDN	0.0841423	0.0800588	0.0196085	0.061069	0.111267	0.0538995	0.146996
LAO	0.0933678	0.088761	0.0225671	0.0680529	0.125969	0.0490579	0.186228
GUY	0.0994723	0.0972615	0.02149	0.0732806	0.121453	0.0605324	0.161825
SLB	0.0911582	0.0882683	0.0188171	0.0694042	0.115716	0.051714	0.14933
ISL	0.150942	0.14584	0.0395508	0.107977	0.209009	0.0765266	0.304045
MOZ	0.094444	0.0910288	0.0205693	0.0722438	0.123248	0.0480389	0.149691
MLI	0.0813757	0.0777807	0.0161353	0.063507	0.105594	0.048835	0.121734
PHL	0.0783636	0.0766227	0.0152687	0.0611312	0.0982077	0.0499281	0.125537
CAN	0.0744775	0.072512	0.0154074	0.0581959	0.0959717	0.0464013	0.119617
CMR	0.105158	0.101942	0.0233278	0.0805964	0.129353	0.0564484	0.186206
FJI	0.0812515	0.0792806	0.0152197	0.0631069	0.099126	0.0542137	0.128856
CIV	0.0957423	0.0946951	0.0218906	0.0690038	0.130956	0.0513388	0.148104
TUR	0.118273	0.114958	0.0269201	0.0862927	0.154737	0.062166	0.206715
LBR	0.10845	0.108666	0.0217511	0.0830303	0.13447	0.0619243	0.181789
BEN	0.089655	0.0867374	0.017496	0.0699099	0.114627	0.0592885	0.140971

## Sheet: Stats_ATR_CCS
	mean	median	std	p10	p90	min	max
CHE	0.0893332	0.0888277	0.015159	0.0701702	0.106928	0.0641983	0.147339
SLV	0.0689392	0.069111	0.0124217	0.0537409	0.0836608	0.0452806	0.111012
ARG	0.0733791	0.0708571	0.014831	0.0558057	0.0923789	0.0469661	0.121038
PAN	0.061644	0.0598736	0.0115461	0.0487051	0.0743633	0.0396616	0.106372
UKR	0.0799354	0.0781424	0.0162848	0.0619736	0.0979226	0.0526828	0.141553
GEO	0.0537919	0.0536666	0.0106305	0.0412163	0.0675137	0.031855	0.0816411
CUB	0.0804251	0.0773346	0.0166656	0.0621217	0.102036	0.0528459	0.137469
ECU	0.078362	0.0773605	0.016	0.0617486	0.0989202	0.0444759	0.130572
DEU	0.0968911	0.0934151	0.0216863	0.0717257	0.12093	0.0589007	0.184963
BFA	0.0599159	0.0580065	0.0113383	0.0484088	0.0746596	0.0363801	0.0971202
MDG	0.0580108	0.0580924	0.0129133	0.0411632	0.0729732	0.0334216	0.095408
KGZ	0.0607608	0.0591886	0.0127347	0.0449934	0.0753537	0.0363907	0.105623
IRQ	0.0670851	0.0671535	0.0117648	0.0529139	0.080756	0.0385255	0.111885
SOM	0.0742342	0.0706274	0.0156928	0.0576652	0.0933921	0.0459824	0.128825
NAM	0.0636088	0.0616407	0.0127909	0.0482875	0.080014	0.0395237	0.10018
ARE	0.0609295	0.0585245	0.0130668	0.0459151	0.0785289	0.0345241	0.0986084
HUN	0.0832992	0.0810537	0.0218942	0.0622997	0.107372	0.0528703	0.169713
SEN	0.0576629	0.0572078	0.0108645	0.0439642	0.0703089	0.0378803	0.0945218
LBY	0.0524374	0.0520282	0.0100192	0.0404618	0.0659232	0.0277463	0.0777783
SDN	0.0804109	0.0789699	0.0152921	0.0609526	0.0959005	0.0523741	0.131585
MYS	0.0614335	0.0600362	0.0106467	0.0472734	0.0764246	0.0432412	0.092307
SUR	0.0654163	0.0644101	0.013518	0.0496753	0.0827859	0.0370326	0.106538
BLZ	0.0720917	0.0717227	0.0137839	0.0561743	0.0880662	0.0453653	0.124773
SVN	0.0915392	0.0874076	0.0185415	0.0690256	0.117313	0.0594295	0.153426
CZE	0.0771337	0.0737678	0.0183867	0.0562097	0.102646	0.0480454	0.139336
IRN	0.0633599	0.0620309	0.0122154	0.0494387	0.079207	0.0408556	0.108182
SLE	0.0657512	0.0648079	0.0115468	0.0529599	0.0796278	0.0377993	0.104619
JOR	0.0606086	0.0600061	0.0117792	0.0450649	0.0761134	0.0396527	0.096888
LTU	0.0848254	0.0823149	0.0210592	0.0621182	0.107421	0.0466461	0.176458
SWE	0.0719792	0.0707689	0.0174392	0.0524926	0.0906001	0.0464214	0.154738
POL	0.0869519	0.083578	0.0180942	0.0658296	0.112792	0.0514443	0.13609
TZA	0.0577506	0.0559333	0.011826	0.0454093	0.072984	0.0380379	0.0949011
VEN	0.0940305	0.0889115	0.0209137	0.0711602	0.122036	0.0510344	0.151412
KEN	0.0630206	0.0624456	0.0125914	0.0477904	0.0796263	0.0357905	0.0955511
SVK	0.0813591	0.0789749	0.0193693	0.059966	0.10258	0.0497787	0.153849
GBR	0.0744792	0.0727928	0.0133927	0.0598099	0.0907088	0.0514738	0.12295
MAR	0.0571553	0.0564232	0.0114781	0.0432473	0.0726455	0.0360813	0.0904825
AGO	0.0607637	0.0595739	0.010695	0.0486151	0.071722	0.0420214	0.10104
KWT	0.0524469	0.0518291	0.0115497	0.0388703	0.0683251	0.0303851	0.0909335
UGA	0.0602398	0.057126	0.0137112	0.0463956	0.0733559	0.0383283	0.122518
KHM	0.0576399	0.0563947	0.0126001	0.0431596	0.0756126	0.0357354	0.091639
COD	0.063787	0.0619705	0.0124906	0.0499048	0.0815565	0.0361818	0.108116
QAT	0.0512047	0.0489964	0.0105321	0.0408683	0.0642717	0.0318851	0.0845803
BGD	0.0611087	0.05896	0.0129591	0.048041	0.0729397	0.0389632	0.120836
GRC	0.0866087	0.084239	0.0181299	0.0631182	0.111349	0.0494406	0.124868
IND	0.0545301	0.0525771	0.0116346	0.0417703	0.0660495	0.0337598	0.103912
MDA	0.0699583	0.0673839	0.0137183	0.0545486	0.0891306	0.0462058	0.118284
GAB	0.0707377	0.0699027	0.0130004	0.0562222	0.088721	0.0449082	0.112511
MWI	0.0646861	0.0628652	0.0130457	0.0496924	0.0822334	0.0379716	0.101688
EGY	0.069829	0.0697259	0.014218	0.054937	0.0907222	0.0417677	0.122395
MNE	0.0692113	0.0679284	0.0129248	0.053177	0.087246	0.0481714	0.111966
ZAF	0.0590024	0.0555611	0.0141309	0.0444697	0.0769309	0.0352884	0.108772
MKD	0.0653949	0.0635223	0.0133373	0.0498555	0.0829842	0.0430367	0.107346
BHS	0.0639384	0.0626428	0.012058	0.0489054	0.0801705	0.0406749	0.105835
ZWE	0.066737	0.066819	0.0123173	0.0517064	0.081343	0.035944	0.109659
IRL	0.0889219	0.0880801	0.0162526	0.0705055	0.114026	0.055245	0.131022
LKA	0.0717827	0.0717015	0.0142207	0.0550966	0.0912146	0.0397411	0.119161
SRB	0.0670205	0.0657354	0.013449	0.0510916	0.083749	0.042531	0.11649
COG	0.0705883	0.0683636	0.0151352	0.0532428	0.088398	0.0439983	0.117787
NZL	0.0740704	0.0718252	0.0155363	0.0556362	0.0976864	0.0504875	0.116698
LVA	0.0815628	0.0778103	0.0190159	0.0593918	0.109166	0.0502021	0.140055
AUS	0.074719	0.0726135	0.0136573	0.0587247	0.0923581	0.047994	0.109131
FLK	0.0690168	0.066677	0.0139381	0.0510556	0.088596	0.0432864	0.106611
ISR	0.065774	0.0651737	0.0122275	0.0504112	0.083781	0.036623	0.0947418
COL	0.0590529	0.0563343	0.0117146	0.045697	0.0751816	0.0364621	0.100441
FIN	0.0941846	0.0933538	0.018448	0.0720389	0.119655	0.0580324	0.157586
GMB	0.0547231	0.0544606	0.0115023	0.0413207	0.0698163	0.0336249	0.0900218
PRT	0.0849787	0.0820139	0.0193138	0.064509	0.106629	0.0535004	0.205623
SAU	0.0729036	0.0708231	0.015945	0.0563896	0.0917359	0.0446776	0.12991
PNG	0.0602539	0.0610666	0.0110317	0.0462596	0.0726829	0.0402318	0.0951613
JAM	0.06204	0.0597298	0.0121822	0.0485369	0.0781983	0.0388333	0.0978642
PAK	0.0714201	0.0701627	0.0133286	0.0567592	0.0903427	0.0431919	0.10959
ZMB	0.0652871	0.0636085	0.0145739	0.0479526	0.0843596	0.0404435	0.12261
CHN	0.070337	0.0669722	0.0169038	0.0519173	0.0950059	0.0458001	0.136933
KAZ	0.0563314	0.0529877	0.012889	0.0430747	0.0726982	0.0374942	0.113464
ARM	0.0606899	0.0595249	0.0110236	0.0489071	0.0769555	0.0346251	0.0850757
LUX	0.0988186	0.0956053	0.0199877	0.0747999	0.124044	0.0549055	0.144868
ALB	0.0652671	0.0644	0.0137323	0.0495723	0.0819514	0.0390654	0.115703
HND	0.0655166	0.0641451	0.0115008	0.0532021	0.0826757	0.0411521	0.10057
NIC	0.0633278	0.0625384	0.0115813	0.0498838	0.0788733	0.0389561	0.0912102
NER	0.064615	0.0630307	0.0132405	0.0489459	0.0844082	0.0394318	0.114207
ETH	0.0741596	0.0738367	0.012477	0.0584003	0.0896574	0.051348	0.11254
GRL	0.0633409	0.062155	0.0111985	0.0493628	0.0756404	0.0422076	0.0990605
OMN	0.0698767	0.0690342	0.0131071	0.0551498	0.0844055	0.0391091	0.11389
ESP	0.0889983	0.0881298	0.0159256	0.069951	0.106461	0.0553128	0.143657
TJK	0.0597898	0.0581547	0.0121044	0.0444894	0.0773156	0.0382043	0.0997827
YEM	0.0793819	0.0789842	0.0141947	0.0614909	0.0958825	0.0475807	0.131119
THA	0.0579018	0.0559948	0.0124796	0.0418815	0.0744864	0.0368043	0.0972136
UZB	0.0559856	0.0550382	0.0117505	0.0433441	0.0727331	0.0345304	0.0932428
DZA	0.0563695	0.0544525	0.0118795	0.0430744	0.0744706	0.035062	0.0873499
FRA	0.0888164	0.0851177	0.0204128	0.0695362	0.108626	0.0607853	0.218678
CRI	0.0673546	0.0653864	0.0130418	0.0517888	0.0865542	0.0456568	0.102609
AUT	0.0733257	0.0719125	0.0162928	0.0528492	0.0911934	0.0399713	0.136577
GHA	0.064534	0.0628071	0.0114539	0.0512738	0.0796698	0.0429554	0.0948193
MEX	0.0565156	0.0534052	0.0127653	0.0416759	0.0759808	0.0302655	0.0966687
HTI	0.0722697	0.0706394	0.0149451	0.0527582	0.0923654	0.0436773	0.115
JPN	0.0902761	0.0887512	0.0182592	0.0668916	0.11595	0.0601786	0.138229
NPL	0.0581029	0.057839	0.0115078	0.0451538	0.0716232	0.0372364	0.0923286
BGR	0.0781328	0.0764186	0.0168713	0.0582803	0.102299	0.0444695	0.123161
DNK	0.0851622	0.084699	0.0175356	0.0640204	0.104726	0.0515574	0.157507
MMR	0.0693219	0.0689292	0.0138335	0.0528929	0.0873508	0.0395556	0.104561
SWZ	0.0573213	0.0560086	0.0133985	0.0433715	0.0712194	0.036015	0.132821
CYP	0.0872938	0.0847578	0.0177996	0.0666529	0.110706	0.0532377	0.153723
ROU	0.0865682	0.0818019	0.0175755	0.0680137	0.112905	0.0524585	0.139532
DOM	0.0628597	0.0595928	0.015149	0.0474316	0.0853637	0.039927	0.114732
BRA	0.0581393	0.0558644	0.0112392	0.044822	0.0722635	0.0346084	0.0884887
ITA	0.0836558	0.0807023	0.0175351	0.0627574	0.107408	0.0576262	0.140756
SYR	0.0778865	0.0754316	0.015837	0.0592127	0.0974649	0.0417774	0.12161
CHL	0.058046	0.0558661	0.012637	0.0449592	0.0781712	0.0365234	0.0996388
BEL	0.0959041	0.0942081	0.0201269	0.0717942	0.125008	0.0602228	0.165304
EST	0.0783008	0.0754077	0.0200927	0.0576579	0.102503	0.0496472	0.162216
LBN	0.0875426	0.0857106	0.0195827	0.065018	0.111068	0.054668	0.161562
GIN	0.0659733	0.0645867	0.0136606	0.0492031	0.0890507	0.0428511	0.105797
BRN	0.0572604	0.0568554	0.0109714	0.0449282	0.0706018	0.0361184	0.0921626
MNG	0.0623025	0.06161	0.012261	0.0467389	0.0799473	0.0384895	0.102343
PRY	0.0622821	0.0609601	0.0132935	0.0474638	0.077717	0.0368081	0.108496
USA	0.0560456	0.052999	0.0113855	0.0447902	0.0728557	0.0390681	0.0932398
RWA	0.0576562	0.0562716	0.0100268	0.0447496	0.0716985	0.0347996	0.0835278
PRK	0.081047	0.0772329	0.0184207	0.061281	0.107586	0.0529772	0.140663
NGA	0.0623112	0.0591543	0.0133744	0.0489364	0.0816432	0.0401377	0.107531
BWA	0.0528614	0.0520548	0.0108577	0.041118	0.0657705	0.0336589	0.0960797
NOR	0.0864518	0.0823104	0.0174222	0.0688567	0.112633	0.0573542	0.140244
BIH	0.0723527	0.0705878	0.0126268	0.0568702	0.0906291	0.0467119	0.106024
BOL	0.0773316	0.0745772	0.0148609	0.0597046	0.101749	0.0521689	0.119175
AZE	0.0605398	0.0583855	0.0116041	0.0478816	0.0756875	0.0374128	0.0978379
BLR	0.0899369	0.0874398	0.0169512	0.0675597	0.113138	0.0582349	0.144026
KOR	0.0708524	0.0671553	0.0124556	0.0565832	0.0873661	0.0479294	0.103734
RUS	0.0389052	0.0390732	0.00603823	0.0308964	0.0458395	0.0257386	0.0535394
PER	0.0574087	0.0569679	0.011351	0.0416765	0.0729188	0.0330502	0.0861493
VNM	0.0594312	0.0576426	0.0115765	0.0447627	0.074651	0.0353935	0.0895955
PSE	0.0907027	0.0866672	0.0177328	0.0698711	0.118139	0.0507748	0.132394
TUN	0.0674683	0.0648629	0.0146268	0.0510036	0.0897587	0.0396479	0.113705
NLD	0.0910249	0.0901355	0.0165894	0.069081	0.1126	0.0619089	0.129405
GTM	0.0640886	0.0638346	0.0137648	0.0471375	0.080409	0.0391833	0.121603
URY	0.0574842	0.0554668	0.0116041	0.0445734	0.0718649	0.0393091	0.109483
HRV	0.0853838	0.0823414	0.0187331	0.0622086	0.11208	0.0529621	0.13489
IDN	0.0609057	0.0579946	0.012683	0.0481486	0.0796261	0.040724	0.0973893
LAO	0.0689319	0.0665668	0.0140234	0.0534298	0.0858811	0.0426582	0.119769
GUY	0.0581546	0.0582511	0.0108715	0.0442778	0.0726598	0.0364659	0.0866373
SLB	0.0631903	0.0631752	0.0128213	0.0478337	0.0794635	0.0407901	0.101712
ISL	0.0852159	0.0859624	0.013769	0.0700029	0.102826	0.0535394	0.123946
MOZ	0.0661954	0.0654571	0.0125066	0.0491765	0.0812039	0.0423161	0.0978066
MLI	0.0650276	0.0644701	0.0120647	0.0502589	0.0804235	0.0418218	0.0962686
PHL	0.0540568	0.0529032	0.0118852	0.0387739	0.071098	0.031537	0.0911824
CAN	0.0736028	0.0721386	0.0133135	0.0577674	0.0906504	0.0511917	0.115265
CMR	0.0655666	0.0655711	0.0135997	0.0478802	0.0794365	0.0406228	0.133282
FJI	0.0660644	0.0639264	0.0140314	0.0492712	0.0838994	0.0397006	0.109656
CIV	0.0585843	0.0569338	0.0123768	0.0447919	0.0747273	0.0329671	0.101524
TUR	0.0777066	0.0770904	0.012126	0.0632833	0.0930142	0.0504409	0.115898
LBR	0.0690313	0.0681669	0.0140699	0.0530819	0.0868037	0.040962	0.119178
BEN	0.0567287	0.0542366	0.0120023	0.0439501	0.0764168	0.0354162	0.0955913

## Sheet: Stats_B_PYR_kerosene
	mean	median	std	p10	p90	min	max
CHE	0.210216	0.203675	0.0304278	0.1775	0.246433	0.147294	0.291558
SLV	0.174527	0.170886	0.0251467	0.147453	0.20337	0.116491	0.279768
ARG	0.170716	0.167327	0.0235821	0.143359	0.19918	0.11738	0.243606
PAN	0.151596	0.152517	0.0206068	0.127082	0.180634	0.10752	0.210316
UKR	0.206158	0.202992	0.0311689	0.167474	0.247239	0.143617	0.280033
GEO	0.142612	0.142279	0.0209997	0.112727	0.171148	0.0980821	0.210115
CUB	0.194386	0.190243	0.0295397	0.158843	0.228056	0.134431	0.301978
ECU	0.181995	0.17949	0.0315981	0.143383	0.226275	0.122557	0.274941
DEU	0.188755	0.18876	0.0259498	0.155905	0.220172	0.135664	0.262386
BFA	0.140394	0.139223	0.0195479	0.119319	0.165021	0.100925	0.205065
MDG	0.127368	0.124163	0.0188711	0.105048	0.152665	0.0910522	0.184246
KGZ	0.158841	0.1552	0.0242337	0.133847	0.18975	0.117677	0.278517
IRQ	0.164862	0.161995	0.0258813	0.13513	0.201422	0.110509	0.238599
SOM	0.156761	0.155341	0.0264153	0.122217	0.193426	0.10191	0.240308
NAM	0.133155	0.130219	0.0187516	0.111361	0.155469	0.100605	0.197121
ARE	0.138661	0.136313	0.0192683	0.116614	0.163588	0.105467	0.203245
HUN	0.156557	0.156969	0.0192099	0.132525	0.178965	0.118124	0.221789
SEN	0.113792	0.110211	0.0190897	0.0930709	0.138951	0.0784934	0.166854
LBY	0.112627	0.112632	0.0157534	0.0944997	0.132907	0.0724417	0.153496
SDN	0.176928	0.175615	0.0271044	0.141447	0.214785	0.115984	0.26726
MYS	0.125025	0.122662	0.0196284	0.1008	0.151317	0.0886369	0.188485
SUR	0.14881	0.146566	0.0194936	0.126619	0.175051	0.115692	0.197093
BLZ	0.183006	0.182366	0.0258023	0.147003	0.210128	0.135124	0.259796
SVN	0.189592	0.187718	0.0271803	0.156452	0.223288	0.136713	0.278355
CZE	0.143319	0.144908	0.018194	0.118622	0.167279	0.108188	0.189159
IRN	0.155489	0.153886	0.021551	0.129667	0.186239	0.110557	0.225867
SLE	0.159979	0.15986	0.0216389	0.132363	0.184857	0.109708	0.217177
JOR	0.143714	0.144672	0.0211837	0.116526	0.169258	0.0995791	0.216977
LTU	0.156958	0.156701	0.019835	0.131391	0.183942	0.101776	0.204022
SWE	0.144637	0.144884	0.0172625	0.123562	0.165473	0.110005	0.180814
POL	0.16435	0.162159	0.0216633	0.137515	0.195815	0.119069	0.223174
TZA	0.131024	0.128973	0.0187003	0.110884	0.157735	0.0902565	0.194017
VEN	0.225754	0.225664	0.0335585	0.188607	0.263567	0.147707	0.328823
KEN	0.171322	0.168987	0.022685	0.144903	0.201278	0.133957	0.236605
SVK	0.166584	0.162	0.0235322	0.138562	0.193993	0.130859	0.283166
GBR	0.197743	0.197135	0.0211632	0.171109	0.225772	0.149363	0.264363
MAR	0.121583	0.118873	0.0163843	0.100708	0.141918	0.0850523	0.170517
AGO	0.147084	0.145147	0.0220988	0.11746	0.172817	0.100903	0.233282
KWT	0.119762	0.119374	0.0137808	0.101217	0.136547	0.090563	0.153161
UGA	0.134253	0.130396	0.0254736	0.105973	0.164628	0.0825159	0.229348
KHM	0.140167	0.138495	0.0181243	0.117739	0.162626	0.100253	0.206899
COD	0.164559	0.161324	0.0250997	0.134577	0.19274	0.123041	0.251667
QAT	0.120363	0.119552	0.0164139	0.102562	0.142597	0.082922	0.189384
BGD	0.150142	0.150059	0.0190527	0.126428	0.176224	0.113866	0.209802
GRC	0.179355	0.176241	0.0268923	0.147033	0.209239	0.127508	0.272053
IND	0.132426	0.128119	0.0214964	0.107762	0.165084	0.0902708	0.198648
MDA	0.169497	0.169642	0.0252147	0.142735	0.196475	0.120512	0.27133
GAB	0.17657	0.176354	0.0234776	0.146749	0.205508	0.127842	0.244637
MWI	0.146566	0.144133	0.0218788	0.121566	0.177452	0.0982116	0.216921
EGY	0.138947	0.137276	0.0234959	0.109445	0.171324	0.0962384	0.211708
MNE	0.18124	0.179367	0.0258467	0.148936	0.212196	0.124398	0.248185
ZAF	0.127786	0.129611	0.015845	0.105157	0.149484	0.0990046	0.170641
MKD	0.172247	0.164126	0.0286313	0.143092	0.213881	0.127103	0.262493
BHS	0.155915	0.15423	0.0197245	0.129663	0.178501	0.12028	0.21858
ZWE	0.147008	0.145318	0.0214285	0.119811	0.173392	0.104313	0.22831
IRL	0.187093	0.188117	0.0199135	0.164723	0.211354	0.134955	0.244787
LKA	0.173849	0.171913	0.0271349	0.144031	0.210601	0.100464	0.266007
SRB	0.171478	0.170969	0.0233485	0.140696	0.204845	0.123158	0.227991
COG	0.16815	0.167677	0.0266929	0.13867	0.197161	0.115394	0.28457
NZL	0.165066	0.16395	0.0208406	0.138259	0.193576	0.118234	0.207671
LVA	0.161172	0.158528	0.0207119	0.13769	0.186617	0.114643	0.23368
AUS	0.169104	0.167313	0.0220687	0.141583	0.197141	0.117409	0.227347
FLK	0.18936	0.185743	0.0288292	0.155723	0.232965	0.130071	0.281772
ISR	0.149705	0.146123	0.0208036	0.123849	0.175731	0.109855	0.213928
COL	0.128547	0.125805	0.0195112	0.107622	0.157242	0.0935493	0.192661
FIN	0.210122	0.208494	0.0293318	0.178818	0.242656	0.151566	0.323206
GMB	0.121106	0.120956	0.0178215	0.0996494	0.144195	0.0849661	0.173556
PRT	0.171514	0.168082	0.0209184	0.147004	0.197178	0.123506	0.24145
SAU	0.155951	0.151679	0.0203617	0.133135	0.186666	0.112756	0.215739
PNG	0.155238	0.154419	0.0247346	0.123677	0.189533	0.10421	0.216501
JAM	0.154169	0.152905	0.0208755	0.12845	0.179746	0.119751	0.235847
PAK	0.170526	0.167885	0.023206	0.141586	0.20214	0.126715	0.230651
ZMB	0.146518	0.14633	0.0217216	0.117345	0.175106	0.0824383	0.193212
CHN	0.104745	0.102924	0.0154908	0.0868316	0.127636	0.0693004	0.149711
KAZ	0.138742	0.137664	0.0179553	0.116349	0.161644	0.101563	0.194894
ARM	0.151602	0.147454	0.0213266	0.125488	0.1804	0.110697	0.219696
LUX	0.189172	0.18699	0.0235177	0.158966	0.218429	0.136603	0.250375
ALB	0.171715	0.170181	0.0224651	0.13989	0.199889	0.12348	0.234831
HND	0.162778	0.160169	0.0240325	0.135848	0.194816	0.116256	0.236029
NIC	0.130456	0.128534	0.0210037	0.10629	0.157791	0.0906586	0.192873
NER	0.142478	0.140852	0.0210423	0.118443	0.169694	0.101109	0.216044
ETH	0.169287	0.168634	0.0252543	0.137785	0.20246	0.108451	0.227452
GRL	0.18448	0.180597	0.0298974	0.151226	0.223936	0.118562	0.270841
OMN	0.157946	0.156949	0.0182657	0.136146	0.181676	0.126467	0.218494
ESP	0.188646	0.187222	0.0207849	0.167018	0.214442	0.146167	0.276317
TJK	0.155122	0.153876	0.021763	0.126642	0.185434	0.114597	0.209161
YEM	0.191349	0.188773	0.0250655	0.162402	0.222455	0.148626	0.267956
THA	0.119036	0.117075	0.0185893	0.0948131	0.143001	0.0796925	0.16308
UZB	0.14212	0.141279	0.0177426	0.119563	0.162772	0.106761	0.203061
DZA	0.120145	0.119657	0.0156672	0.100245	0.14053	0.0848818	0.160438
FRA	0.196812	0.190612	0.0254417	0.166093	0.230381	0.155851	0.265356
CRI	0.163943	0.16175	0.0235157	0.136399	0.196463	0.121265	0.232642
AUT	0.1601	0.159879	0.0237347	0.131302	0.183093	0.115781	0.26738
GHA	0.168194	0.165876	0.0253645	0.136965	0.202786	0.126092	0.230071
MEX	0.117947	0.117664	0.0171598	0.0958181	0.141476	0.0811398	0.153573
HTI	0.174797	0.169595	0.0276285	0.146434	0.212299	0.129704	0.273271
JPN	0.256162	0.251123	0.0363999	0.210885	0.300734	0.177838	0.371529
NPL	0.149372	0.146694	0.0232854	0.122132	0.181505	0.087172	0.218156
BGR	0.165323	0.164062	0.0162947	0.144064	0.187598	0.127644	0.208562
DNK	0.192166	0.19179	0.0214064	0.164542	0.220898	0.137039	0.237567
MMR	0.173956	0.171437	0.0239436	0.147153	0.205966	0.121341	0.243776
SWZ	0.124166	0.124064	0.0175154	0.101001	0.145593	0.0843752	0.170848
CYP	0.180623	0.179999	0.0228287	0.151522	0.212493	0.138559	0.246404
ROU	0.184265	0.185462	0.0228766	0.154282	0.213978	0.137303	0.241954
DOM	0.153343	0.151484	0.0231709	0.124775	0.181267	0.109315	0.276162
BRA	0.123512	0.121782	0.0203853	0.0988675	0.149592	0.0865894	0.188328
ITA	0.160516	0.157874	0.0220653	0.138825	0.184707	0.120636	0.234949
SYR	0.190926	0.184866	0.0273814	0.166178	0.228063	0.126512	0.286195
CHL	0.117189	0.117899	0.0164914	0.0986053	0.136386	0.078025	0.165994
BEL	0.183895	0.183603	0.0215021	0.155196	0.213543	0.142813	0.242364
EST	0.157159	0.157403	0.020554	0.132439	0.179777	0.112086	0.214752
LBN	0.21158	0.206767	0.0345864	0.170147	0.25537	0.136757	0.305271
GIN	0.161821	0.158984	0.0239054	0.133713	0.18714	0.118822	0.239745
BRN	0.143177	0.143585	0.021058	0.117651	0.172639	0.107115	0.205813
MNG	0.149948	0.147074	0.0211846	0.124547	0.182576	0.112386	0.207604
PRY	0.127324	0.127092	0.0184821	0.105173	0.148661	0.0925438	0.187343
USA	0.14785	0.14563	0.0174058	0.127879	0.172542	0.115204	0.202992
RWA	0.137315	0.136487	0.0211459	0.111765	0.163539	0.0901128	0.20661
PRK	0.185775	0.178998	0.0276918	0.15717	0.21846	0.133566	0.267418
NGA	0.141217	0.139042	0.0223394	0.112646	0.169179	0.0924381	0.220671
BWA	0.116162	0.115027	0.0184511	0.0940268	0.135512	0.0774621	0.172205
NOR	0.198326	0.195715	0.0253978	0.170895	0.229333	0.146548	0.281468
BIH	0.189891	0.183938	0.027971	0.155708	0.225358	0.142161	0.274776
BOL	0.174516	0.173122	0.0249002	0.143687	0.205965	0.120724	0.24223
AZE	0.153089	0.152253	0.0199734	0.128692	0.182209	0.112224	0.209605
BLR	0.232454	0.22923	0.037251	0.185023	0.285211	0.156055	0.351277
KOR	0.159098	0.155078	0.0230602	0.132967	0.186775	0.118854	0.258698
RUS	0.151041	0.147768	0.0232068	0.122765	0.1801	0.116592	0.24732
PER	0.12877	0.127802	0.0204329	0.104169	0.157947	0.085672	0.200509
VNM	0.135335	0.132226	0.0214383	0.114554	0.159139	0.0825278	0.214716
PSE	0.212336	0.213306	0.0285296	0.176822	0.24311	0.161009	0.307766
TUN	0.146153	0.143173	0.0200966	0.12539	0.171582	0.104659	0.214826
NLD	0.177605	0.176122	0.0234932	0.148954	0.207541	0.133621	0.258576
GTM	0.160288	0.155706	0.0233718	0.132843	0.192862	0.114361	0.232037
URY	0.115188	0.113207	0.0175683	0.0947371	0.132714	0.081691	0.17136
HRV	0.172869	0.166736	0.0278464	0.143455	0.215267	0.126493	0.256869
IDN	0.140574	0.136595	0.0201187	0.118544	0.161763	0.10352	0.217801
LAO	0.168062	0.162789	0.0305698	0.13333	0.215057	0.11749	0.266178
GUY	0.135344	0.134609	0.0221436	0.109938	0.166635	0.091711	0.205995
SLB	0.153876	0.151301	0.0218445	0.130418	0.182401	0.113258	0.236956
ISL	0.220573	0.215984	0.0363923	0.1803	0.274962	0.139962	0.31246
MOZ	0.15009	0.148206	0.0242404	0.117994	0.179331	0.0997511	0.204305
MLI	0.141156	0.137208	0.0227653	0.115988	0.172942	0.0984761	0.228961
PHL	0.124603	0.122169	0.0161025	0.105439	0.144812	0.0908604	0.174133
CAN	0.173392	0.172692	0.0199029	0.151595	0.197067	0.126497	0.240063
CMR	0.152734	0.149287	0.0261186	0.121561	0.184543	0.0926215	0.231591
FJI	0.154483	0.151079	0.018385	0.132612	0.181131	0.114807	0.203198
CIV	0.135398	0.130478	0.02395	0.111041	0.162295	0.0952129	0.224636
TUR	0.199015	0.200407	0.0316638	0.164002	0.244389	0.136004	0.313906
LBR	0.160556	0.160197	0.0239204	0.129781	0.190284	0.116098	0.244256
BEN	0.129636	0.131022	0.0185446	0.106385	0.153368	0.0863963	0.182442

## Sheet: Stats_CLR
	mean	median	std	p10	p90	min	max
CHE	0.0819603	0.0807064	0.0137321	0.0655124	0.101184	0.0440178	0.111452
SLV	0.0628146	0.0615781	0.0141672	0.0484977	0.0817728	0.0349107	0.113912
ARG	0.0676291	0.0656165	0.0147927	0.050965	0.0830544	0.038669	0.128597
PAN	0.0582544	0.0566044	0.0133605	0.0433326	0.0729468	0.0369349	0.135231
UKR	0.0724291	0.0710027	0.0165513	0.0512669	0.0935904	0.0392361	0.126699
GEO	0.0514636	0.0491983	0.0124576	0.0373749	0.0707197	0.0309375	0.0834142
CUB	0.0718137	0.0702902	0.015554	0.0541837	0.0947823	0.0417967	0.125754
ECU	0.0698166	0.0678914	0.0136484	0.0538963	0.0864381	0.0403822	0.107805
DEU	0.0910109	0.0859602	0.0263869	0.0619206	0.127886	0.0530344	0.185685
BFA	0.0580426	0.0567306	0.0115924	0.0437413	0.0727565	0.0320799	0.0923226
MDG	0.0562492	0.0550722	0.0128915	0.0412362	0.0718046	0.0340872	0.0997334
KGZ	0.0557359	0.0551156	0.013599	0.0380749	0.0742983	0.0306945	0.0897112
IRQ	0.0616745	0.059967	0.0132523	0.0469027	0.0808118	0.0326186	0.119038
SOM	0.0672875	0.0662476	0.0132397	0.0524645	0.0844836	0.0384729	0.109931
NAM	0.0576299	0.055528	0.0131906	0.0419784	0.0737763	0.0367433	0.109178
ARE	0.0574056	0.0559476	0.0133145	0.0411574	0.0757758	0.0343948	0.0944647
HUN	0.0794319	0.0746182	0.0187127	0.0578672	0.105887	0.0472854	0.130922
SEN	0.0553253	0.0539004	0.0117418	0.0414444	0.0720491	0.0357865	0.0892086
LBY	0.0509873	0.0482728	0.0122265	0.0385417	0.0687844	0.0327859	0.100807
SDN	0.0720145	0.070763	0.0159936	0.0530414	0.0919394	0.0413984	0.122112
MYS	0.0553155	0.0528054	0.0125164	0.0420942	0.0707328	0.0365013	0.125187
SUR	0.0609474	0.0583093	0.0138676	0.0450066	0.0787075	0.0368559	0.107426
BLZ	0.0656086	0.064474	0.0123817	0.0504292	0.0808363	0.0418519	0.104366
SVN	0.0876263	0.0813788	0.023144	0.0646674	0.114708	0.0465247	0.179789
CZE	0.0748554	0.0719156	0.0148286	0.060815	0.0980332	0.0380296	0.123111
IRN	0.0585285	0.0586023	0.0121243	0.04344	0.0763609	0.0339995	0.0866162
SLE	0.0601429	0.0592654	0.0129794	0.0455947	0.0791438	0.0341171	0.0954524
JOR	0.0572003	0.0554146	0.012158	0.0437577	0.0736425	0.0311117	0.0992382
LTU	0.0838731	0.0816609	0.0206915	0.0572093	0.11051	0.0403106	0.140705
SWE	0.0736283	0.0696262	0.0207434	0.0531765	0.0966473	0.033801	0.160347
POL	0.0830638	0.0797255	0.0214946	0.0589921	0.109429	0.0466388	0.1809
TZA	0.0538236	0.051079	0.0169348	0.0388475	0.0691237	0.0284817	0.170481
VEN	0.0825772	0.0813973	0.0175335	0.0629628	0.103483	0.048298	0.138597
KEN	0.0599754	0.0590296	0.0132671	0.0451298	0.0766949	0.038371	0.102402
SVK	0.078458	0.0744761	0.0201377	0.0553365	0.10452	0.0399125	0.169031
GBR	0.0707894	0.0692956	0.0155994	0.0535448	0.089437	0.0408334	0.131056
MAR	0.0546478	0.0543477	0.0109065	0.0405181	0.068315	0.0368422	0.0808443
AGO	0.0575759	0.0562987	0.0125752	0.0419778	0.0740614	0.0325431	0.0935806
KWT	0.0500206	0.0484511	0.0114761	0.0370996	0.0650948	0.03032	0.0853072
UGA	0.0567429	0.0560147	0.0135173	0.0415468	0.0732808	0.0326659	0.117872
KHM	0.0540019	0.0507819	0.0132967	0.04035	0.0714205	0.0335358	0.0947297
COD	0.0611064	0.0593421	0.0168762	0.0415173	0.0803731	0.0315604	0.122116
QAT	0.0485772	0.0476899	0.0116674	0.0351268	0.0623837	0.0269343	0.0883466
BGD	0.0555053	0.0536602	0.0120045	0.0420065	0.074326	0.0329327	0.0990429
GRC	0.0825677	0.0807865	0.0198559	0.0567663	0.107521	0.047029	0.159118
IND	0.0510347	0.0508062	0.0112773	0.037764	0.0653329	0.0311412	0.0841788
MDA	0.0612508	0.0588329	0.0119854	0.0476795	0.0765952	0.0393891	0.100284
GAB	0.0645054	0.0622824	0.0138107	0.048069	0.0812456	0.0399056	0.112626
MWI	0.0602939	0.0569679	0.0121509	0.0463487	0.0763682	0.0405118	0.0900371
EGY	0.0617273	0.0597326	0.0132029	0.0474802	0.0767046	0.0381511	0.107197
MNE	0.0645645	0.062384	0.0133796	0.0482385	0.0815778	0.0430073	0.102705
ZAF	0.0562365	0.0537167	0.0141876	0.0393583	0.0759827	0.0334552	0.0947458
MKD	0.0615197	0.0603175	0.0126006	0.0483144	0.0784136	0.0361453	0.110472
BHS	0.0617385	0.0607919	0.0138439	0.0456753	0.079028	0.0335404	0.101254
ZWE	0.0607831	0.0561543	0.0167976	0.0447059	0.0837091	0.0363057	0.124924
IRL	0.0888743	0.0874903	0.0210685	0.0627097	0.117929	0.0504246	0.142873
LKA	0.0656979	0.0636955	0.0162332	0.0483414	0.0845177	0.0401423	0.147434
SRB	0.0628263	0.0619471	0.0125904	0.0480716	0.0806043	0.0403329	0.0969939
COG	0.0655645	0.0636086	0.0132465	0.0503344	0.0852066	0.0420648	0.0981175
NZL	0.0699536	0.0666839	0.0156155	0.0519733	0.0893597	0.043031	0.134481
LVA	0.080211	0.0766628	0.0226694	0.0539039	0.105325	0.0452089	0.181984
AUS	0.0697738	0.0687082	0.0122831	0.054924	0.086831	0.0483328	0.112332
FLK	0.0635097	0.0619302	0.0129986	0.04876	0.0772811	0.0443442	0.134633
ISR	0.05973	0.0572197	0.0113091	0.0471022	0.0729233	0.0364742	0.0959323
COL	0.0568023	0.0555682	0.0123923	0.0422101	0.0764562	0.0358726	0.0898582
FIN	0.0902388	0.0873178	0.0225583	0.0639909	0.115109	0.0517847	0.164297
GMB	0.0516414	0.0492244	0.0117734	0.0383669	0.0679228	0.0276465	0.0828499
PRT	0.0840069	0.0823562	0.0179845	0.0641534	0.108963	0.0518959	0.136335
SAU	0.0632407	0.0612484	0.0139242	0.0481639	0.0790206	0.0343536	0.111832
PNG	0.0571077	0.0563722	0.0123839	0.0441504	0.0713952	0.0350785	0.106041
JAM	0.0600549	0.0584616	0.0142123	0.0435119	0.0761398	0.0348989	0.116255
PAK	0.0616484	0.059271	0.0123416	0.0495587	0.0797209	0.0381588	0.0994429
ZMB	0.0599604	0.0586771	0.0128327	0.044451	0.0776209	0.0329181	0.0979637
CHN	0.0727772	0.072288	0.0199025	0.048402	0.0986611	0.0373517	0.123922
KAZ	0.0503795	0.0496577	0.0112355	0.0368656	0.0636388	0.0257487	0.0863075
ARM	0.0574672	0.0556283	0.0118191	0.0438585	0.073722	0.0346959	0.0876219
LUX	0.0932036	0.088679	0.0213728	0.070203	0.119449	0.055865	0.162464
ALB	0.0592685	0.0577016	0.0125527	0.0451023	0.076951	0.0354559	0.100175
HND	0.062519	0.0608905	0.0122223	0.0470649	0.0776708	0.0380472	0.0979034
NIC	0.0578949	0.0566828	0.0123885	0.0438137	0.0759587	0.0332619	0.0934844
NER	0.0599859	0.0593088	0.0130852	0.0427274	0.0780949	0.0319309	0.0913379
ETH	0.0666889	0.0674505	0.0132534	0.0506506	0.0820503	0.0379869	0.106898
GRL	0.0603293	0.0578034	0.0129935	0.0469825	0.0773197	0.0357908	0.107719
OMN	0.0630911	0.0614379	0.0122404	0.0483389	0.0811911	0.0380433	0.0939236
ESP	0.0855869	0.0835468	0.018593	0.0658443	0.104614	0.0495433	0.160413
TJK	0.0583623	0.0582486	0.0131828	0.0418627	0.0734548	0.0373984	0.0998493
YEM	0.0721537	0.0710356	0.0126525	0.0561563	0.0894421	0.0427765	0.0999747
THA	0.0537617	0.0523946	0.0109653	0.0408166	0.0668915	0.0310079	0.0856048
UZB	0.0536365	0.0510605	0.0115954	0.0403385	0.0705437	0.0306478	0.085599
DZA	0.0538237	0.0525166	0.0110854	0.0412906	0.0684742	0.0321681	0.0838053
FRA	0.0849721	0.0833012	0.0188048	0.0631727	0.110423	0.0509874	0.139251
CRI	0.0613832	0.0596912	0.012603	0.0483344	0.0777849	0.0360427	0.107119
AUT	0.0728755	0.0680846	0.0221048	0.0518618	0.100063	0.0409144	0.154201
GHA	0.058919	0.0573955	0.0122692	0.0435396	0.0771619	0.0334001	0.0933788
MEX	0.0561575	0.0551367	0.0116911	0.0423358	0.0707494	0.0317112	0.0867409
HTI	0.0632748	0.0607912	0.0123747	0.0498425	0.078846	0.0368782	0.0930446
JPN	0.0915908	0.0878868	0.0216646	0.06743	0.118016	0.0466548	0.169951
NPL	0.0548845	0.0519449	0.0139412	0.0410805	0.0688561	0.0334386	0.128451
BGR	0.0777876	0.0747293	0.0187594	0.0563962	0.0986305	0.0472732	0.14322
DNK	0.0849899	0.0835562	0.0202882	0.0617852	0.109919	0.049619	0.159201
MMR	0.0642121	0.0638046	0.0150622	0.0483756	0.0789194	0.0356434	0.122437
SWZ	0.0529881	0.0506541	0.0117846	0.0394468	0.0694805	0.031433	0.0884053
CYP	0.0825652	0.0789784	0.0198791	0.0603858	0.110734	0.0471878	0.157826
ROU	0.0869186	0.0846181	0.0208989	0.0618743	0.112212	0.0501228	0.155508
DOM	0.0585601	0.0566658	0.0132815	0.0449974	0.0735227	0.0348763	0.107491
BRA	0.0532997	0.051954	0.0117384	0.0390856	0.0681388	0.0310786	0.0998833
ITA	0.0805991	0.0782896	0.0172474	0.0591727	0.104949	0.0473836	0.120332
SYR	0.0719739	0.0707341	0.0141281	0.0540494	0.090723	0.0481481	0.111442
CHL	0.0569438	0.0542947	0.0144519	0.0419868	0.0759078	0.0289796	0.0997451
BEL	0.092529	0.0896248	0.022555	0.0693078	0.121619	0.0540325	0.176431
EST	0.0741844	0.0692894	0.0182515	0.0555067	0.100386	0.044163	0.124608
LBN	0.0781404	0.0785723	0.0156244	0.0555074	0.0950231	0.0410004	0.114705
GIN	0.0599448	0.0575924	0.0132074	0.0450013	0.0793293	0.0344349	0.104105
BRN	0.0542379	0.052262	0.0121	0.0398922	0.0692674	0.031021	0.0947424
MNG	0.0571296	0.0566339	0.0113061	0.0439662	0.0715899	0.0381415	0.0929373
PRY	0.0580099	0.0562125	0.0134996	0.0421165	0.0724639	0.0382447	0.10217
USA	0.0490577	0.0480671	0.0100058	0.0384944	0.0623644	0.0289971	0.0814125
RWA	0.0547677	0.0530547	0.0144341	0.0397428	0.0715549	0.028925	0.111758
PRK	0.0685149	0.0675281	0.0126843	0.0513424	0.0863198	0.0430138	0.0998603
NGA	0.0566909	0.0541061	0.011944	0.0438704	0.0718733	0.0307777	0.0872181
BWA	0.0519067	0.0494823	0.0137741	0.0382461	0.0680778	0.0309077	0.113487
NOR	0.0792231	0.0768052	0.0148911	0.0625657	0.0974673	0.051917	0.133951
BIH	0.0682684	0.0671959	0.0137272	0.0507231	0.0858295	0.0440274	0.112273
BOL	0.0724516	0.0701075	0.0134928	0.0561427	0.0899826	0.0466361	0.117452
AZE	0.0588574	0.0580907	0.013461	0.041727	0.0761298	0.0347662	0.100472
BLR	0.0818252	0.0796261	0.0184723	0.0586614	0.103732	0.0509199	0.133789
KOR	0.0672889	0.066475	0.0153668	0.0493009	0.0877605	0.034201	0.111147
RUS	0.0324558	0.031338	0.00562019	0.0252519	0.0404292	0.022224	0.0480844
PER	0.0522247	0.0509829	0.0119782	0.0381516	0.065915	0.0343059	0.0869527
VNM	0.0540355	0.052662	0.0109446	0.0407086	0.0698915	0.0337262	0.0885668
PSE	0.0799354	0.0770791	0.0152595	0.0626864	0.0994397	0.0404787	0.119779
TUN	0.0647689	0.0640311	0.0136928	0.0497669	0.0814469	0.0380324	0.116916
NLD	0.0878851	0.0830398	0.0187574	0.0684485	0.115593	0.0521577	0.148298
GTM	0.057431	0.0569435	0.0111285	0.0438856	0.0738284	0.0359179	0.0906307
URY	0.0526774	0.0530713	0.0106464	0.0393236	0.0666716	0.0301646	0.0827594
HRV	0.0836564	0.0809741	0.0211443	0.0590204	0.116944	0.0483778	0.139199
IDN	0.0570905	0.055614	0.0129956	0.0421317	0.0712774	0.0356002	0.106075
LAO	0.0645702	0.0630031	0.0145696	0.0467022	0.0804234	0.0367355	0.119221
GUY	0.0538675	0.0500559	0.0139161	0.039553	0.0724485	0.0341306	0.109722
SLB	0.0578295	0.0551703	0.0152285	0.0414052	0.0771654	0.0351208	0.120631
ISL	0.0777167	0.0769458	0.013063	0.0636167	0.0932162	0.0519435	0.119705
MOZ	0.0632119	0.0615746	0.0126403	0.0473865	0.0810667	0.0381744	0.0992022
MLI	0.058779	0.0580727	0.0132662	0.0426816	0.0772819	0.0362049	0.0981083
PHL	0.0518037	0.0515105	0.0123284	0.0370759	0.0689798	0.0314857	0.0927968
CAN	0.066217	0.0652728	0.0121515	0.0495	0.082503	0.0395247	0.0969741
CMR	0.0593791	0.0580871	0.0134166	0.0440448	0.0725253	0.0364767	0.108813
FJI	0.0589192	0.05719	0.0107494	0.0459382	0.0742295	0.0384154	0.0822379
CIV	0.0541779	0.0524725	0.011757	0.0396423	0.0717857	0.0339527	0.0840369
TUR	0.069838	0.0687013	0.0138897	0.0524345	0.0834052	0.0408094	0.118662
LBR	0.0599974	0.0579113	0.0121678	0.0452044	0.0774355	0.0364868	0.094272
BEN	0.0550564	0.0550834	0.0118967	0.0402748	0.0686904	0.0321856	0.0889414

## Sheet: Stats_CuCl
	mean	median	std	p10	p90	min	max
ARG	0.146403	0.135997	0.041254	0.104384	0.204751	0.0813582	0.269547
CHE	0.0886333	0.0849911	0.0181041	0.0680447	0.11145	0.0549484	0.138062
USA	0.0842148	0.0825	0.0172476	0.0663222	0.104685	0.0541081	0.135705
UKR	0.104667	0.103729	0.0181123	0.0813831	0.128146	0.0735439	0.149593
IND	0.105077	0.0995664	0.026659	0.0764583	0.141607	0.0556415	0.194929
ESP	0.133765	0.130194	0.0306645	0.0994752	0.168025	0.0649954	0.253085
ARE	0.115083	0.113065	0.0245292	0.0835299	0.146248	0.0699661	0.184272
KOR	0.123542	0.117289	0.0315885	0.095332	0.152912	0.0779001	0.295809
HUN	0.0988481	0.0954232	0.0230114	0.0722642	0.127977	0.0538616	0.177975
RUS	0.095044	0.0911902	0.0209817	0.071917	0.123821	0.0540716	0.163116
FRA	0.0838182	0.0824315	0.0153393	0.0646542	0.10223	0.054186	0.127915
ZAF	0.150192	0.136488	0.0418461	0.104639	0.21355	0.0881233	0.296847
NLD	0.162998	0.153282	0.0427602	0.117899	0.223841	0.0910254	0.366165
SVN	0.109552	0.106415	0.0257755	0.0810056	0.147436	0.0646361	0.202502
CZE	0.11711	0.113124	0.0282703	0.0867126	0.148786	0.0690475	0.210729
IRN	0.15623	0.14956	0.0395681	0.111558	0.204913	0.0932572	0.313241
MEX	0.137897	0.133634	0.0365104	0.0966775	0.185205	0.0644584	0.236963
JPN	0.178973	0.176344	0.045575	0.124571	0.225329	0.0887321	0.408626
BGR	0.103331	0.0980952	0.0273827	0.0735113	0.135689	0.0531101	0.192237
SWE	0.0690375	0.0673251	0.0163489	0.0516763	0.0937471	0.0351047	0.126612
FIN	0.119226	0.119736	0.0221061	0.091203	0.148909	0.0776913	0.172074
CAN	0.157788	0.1499	0.0394107	0.109198	0.216999	0.0874007	0.254099
ROU	0.108141	0.106108	0.0245827	0.0793505	0.144915	0.0626046	0.189212
SVK	0.211739	0.202378	0.0511841	0.150822	0.276581	0.105655	0.358744
GBR	0.146631	0.147297	0.0326433	0.105316	0.188916	0.0775477	0.223728
PAK	0.122893	0.121803	0.0307353	0.0856513	0.154883	0.074106	0.223387
BRA	0.129212	0.125134	0.0317709	0.0944933	0.180307	0.0589612	0.23693
CHN	0.128557	0.12309	0.0332962	0.0948451	0.169228	0.0736667	0.230891
ARM	0.101532	0.0989067	0.026208	0.0713807	0.137427	0.0572367	0.176253
BEL	0.140883	0.134475	0.0372686	0.0979408	0.181277	0.0720081	0.325862

## Sheet: Stats_HB
	mean	median	std	p10	p90	min	max
CHE	0.263254	0.245054	0.0877246	0.182029	0.363158	0.147789	0.745762
SLV	0.212514	0.200839	0.0618834	0.14667	0.298382	0.119219	0.414663
ARG	0.225097	0.222222	0.0548391	0.158421	0.29963	0.124168	0.394513
PAN	0.199922	0.181261	0.0682118	0.132421	0.290041	0.0984625	0.508829
UKR	0.245994	0.245711	0.0654182	0.175751	0.324654	0.0942755	0.503006
GEO	0.19678	0.183251	0.0596723	0.132528	0.282406	0.0848596	0.408954
CUB	0.231395	0.215146	0.0656357	0.155403	0.323222	0.107023	0.410525
ECU	0.243927	0.234856	0.0706139	0.162749	0.330279	0.127973	0.503051
DEU	0.182906	0.178516	0.0495916	0.131352	0.240609	0.0828947	0.368662
BFA	0.179	0.173221	0.0520552	0.114299	0.253711	0.0809859	0.329465
MDG	0.173747	0.169544	0.0483428	0.110461	0.240862	0.0702518	0.284676
KGZ	0.200271	0.199468	0.051096	0.142513	0.268937	0.112201	0.373556
IRQ	0.18589	0.174977	0.0582861	0.12216	0.270605	0.08538	0.385981
SOM	0.193907	0.184776	0.0588047	0.125569	0.260037	0.0883612	0.388217
NAM	0.175181	0.171449	0.0515938	0.11127	0.239882	0.0887231	0.381579
ARE	0.152818	0.149873	0.0405416	0.104661	0.203465	0.060714	0.289093
HUN	0.191199	0.187966	0.0531809	0.129267	0.26102	0.0933472	0.370039
SEN	0.164948	0.157558	0.047131	0.109066	0.245704	0.08087	0.288896
LBY	0.140093	0.135781	0.0348818	0.0992129	0.189987	0.0799274	0.247428
SDN	0.210733	0.204701	0.0575183	0.14378	0.286769	0.128119	0.392396
MYS	0.186839	0.178326	0.0552668	0.126968	0.256688	0.100088	0.352089
SUR	0.206385	0.204361	0.0538722	0.137603	0.278392	0.10936	0.356675
BLZ	0.235663	0.233578	0.0667864	0.153182	0.32264	0.0910403	0.417764
SVN	0.218516	0.213431	0.0648768	0.144145	0.30867	0.0970292	0.430842
CZE	0.181626	0.171273	0.049231	0.129815	0.258288	0.108169	0.324344
IRN	0.172808	0.168837	0.040736	0.122494	0.222521	0.0784251	0.298088
SLE	0.233112	0.216087	0.0750609	0.155238	0.32459	0.102067	0.556775
JOR	0.168832	0.16454	0.0527118	0.105597	0.23472	0.0873966	0.340835
LTU	0.179895	0.1715	0.0581896	0.122354	0.256269	0.0908621	0.482788
SWE	0.166158	0.165763	0.0428052	0.108851	0.228136	0.0890787	0.301527
POL	0.188748	0.177141	0.0567601	0.129379	0.271751	0.0823786	0.354518
TZA	0.177857	0.168638	0.0540714	0.116005	0.249078	0.0935835	0.33592
VEN	0.292101	0.29246	0.0851041	0.194553	0.396396	0.138407	0.567359
KEN	0.173801	0.165297	0.0466553	0.121966	0.232335	0.0968565	0.352116
SVK	0.191653	0.190638	0.052605	0.129832	0.247789	0.10426	0.355491
GBR	0.192416	0.184226	0.056792	0.123507	0.262651	0.0795068	0.375613
MAR	0.154101	0.145227	0.0408945	0.105228	0.20403	0.0937906	0.289038
AGO	0.203565	0.18601	0.0618985	0.13232	0.279398	0.106607	0.417827
KWT	0.136392	0.133446	0.0393544	0.0844012	0.188324	0.0719117	0.251423
UGA	0.215071	0.203735	0.0684701	0.136611	0.301949	0.111682	0.426905
KHM	0.173392	0.161931	0.0520786	0.116471	0.243695	0.0875077	0.371096
COD	0.205683	0.195706	0.0601271	0.146294	0.274255	0.10628	0.49882
QAT	0.132835	0.125112	0.0389468	0.0934045	0.176901	0.073088	0.291318
BGD	0.181175	0.175443	0.0499746	0.123213	0.24857	0.0914562	0.34076
GRC	0.200959	0.191441	0.0610778	0.131904	0.276953	0.101017	0.431951
IND	0.210778	0.204342	0.0627269	0.133924	0.289295	0.105224	0.495782
MDA	0.204119	0.196175	0.0490425	0.146442	0.266173	0.117644	0.333308
GAB	0.241094	0.219404	0.0730801	0.169913	0.348182	0.136344	0.468728
MWI	0.186302	0.168932	0.0611508	0.121924	0.277443	0.089503	0.391282
EGY	0.183658	0.184766	0.0499392	0.12095	0.245422	0.0890049	0.295026
MNE	0.24621	0.23888	0.0676692	0.176881	0.34631	0.1307	0.46334
ZAF	0.158409	0.154506	0.043739	0.108979	0.203642	0.0763164	0.306033
MKD	0.240141	0.218608	0.0759147	0.16416	0.348991	0.124283	0.478185
BHS	0.17477	0.175953	0.0427892	0.119402	0.225503	0.0959932	0.314588
ZWE	0.201894	0.185494	0.0634679	0.138611	0.273749	0.085574	0.48089
IRL	0.185781	0.178346	0.0478918	0.12874	0.253084	0.103588	0.336386
LKA	0.206314	0.18867	0.0624493	0.141496	0.288467	0.113253	0.402206
SRB	0.217618	0.21274	0.061111	0.1494	0.286921	0.11603	0.491894
COG	0.223577	0.218531	0.058701	0.156832	0.289132	0.102754	0.408265
NZL	0.179558	0.171754	0.0519939	0.127835	0.228866	0.0862241	0.371297
LVA	0.178464	0.181491	0.0476985	0.117504	0.235743	0.0930818	0.313319
AUS	0.181845	0.17265	0.0492545	0.131042	0.245127	0.0794187	0.385153
FLK	0.288578	0.272453	0.0775065	0.209622	0.383977	0.174695	0.681769
ISR	0.15574	0.152126	0.0381485	0.107575	0.209902	0.0847319	0.263853
COL	0.180504	0.173945	0.0524357	0.124885	0.252249	0.07671	0.331081
FIN	0.295224	0.290469	0.0901823	0.193297	0.422391	0.107033	0.577024
GMB	0.16591	0.163433	0.0476297	0.109512	0.232645	0.0770576	0.29059
PRT	0.18363	0.171433	0.0576362	0.11958	0.261206	0.099997	0.412385
SAU	0.163339	0.153409	0.0476704	0.11341	0.212861	0.0708534	0.365734
PNG	0.193176	0.187155	0.0641855	0.11753	0.266163	0.0896082	0.40774
JAM	0.18558	0.187625	0.0557119	0.114934	0.242661	0.0942558	0.41523
PAK	0.206117	0.197837	0.0578661	0.137816	0.282856	0.0881948	0.418843
ZMB	0.205056	0.199935	0.0559679	0.138424	0.285952	0.0877008	0.362323
CHN	0.141641	0.130786	0.0436504	0.0948253	0.207767	0.0699729	0.284924
KAZ	0.174428	0.164678	0.0540285	0.11263	0.25291	0.0781142	0.345642
ARM	0.197709	0.187525	0.0511162	0.137971	0.270118	0.105173	0.342805
LUX	0.194998	0.189354	0.0579388	0.136197	0.247415	0.0864633	0.46697
ALB	0.227805	0.217802	0.0639335	0.148125	0.312857	0.131945	0.444184
HND	0.191121	0.190229	0.0531949	0.132781	0.253488	0.0957318	0.437352
NIC	0.19296	0.18548	0.0529761	0.132414	0.266175	0.107294	0.395373
NER	0.17551	0.166537	0.0514429	0.119311	0.240502	0.083564	0.346146
ETH	0.220058	0.214621	0.0591001	0.15211	0.290235	0.10917	0.415968
GRL	0.279873	0.261459	0.090852	0.186699	0.382042	0.153409	0.609824
OMN	0.168828	0.1556	0.0505682	0.12087	0.250926	0.0916997	0.31423
ESP	0.194224	0.187384	0.0591876	0.126507	0.271839	0.09355	0.391035
TJK	0.195471	0.187611	0.0519807	0.137291	0.267021	0.108121	0.355126
YEM	0.235993	0.231331	0.0661754	0.16549	0.318807	0.108503	0.449254
THA	0.172135	0.167605	0.0551467	0.107587	0.223564	0.0960861	0.454968
UZB	0.182944	0.174558	0.0589377	0.120593	0.263821	0.0915059	0.394443
DZA	0.155334	0.14717	0.0415394	0.109869	0.210703	0.0825809	0.288278
FRA	0.187894	0.170648	0.0643773	0.118801	0.277514	0.0817547	0.418071
CRI	0.202257	0.193664	0.0631368	0.140312	0.270276	0.0833074	0.531916
AUT	0.173039	0.166347	0.0482463	0.118751	0.22991	0.0881347	0.37657
GHA	0.245854	0.22878	0.0828233	0.166956	0.339288	0.122988	0.580825
MEX	0.166594	0.154839	0.0484827	0.118332	0.221378	0.0843301	0.32379
HTI	0.206858	0.19359	0.0644517	0.129906	0.30982	0.10254	0.395838
JPN	0.303751	0.292369	0.0927381	0.198556	0.442812	0.123055	0.592425
NPL	0.19398	0.189986	0.0531575	0.133876	0.247054	0.0821514	0.374444
BGR	0.189987	0.185856	0.048901	0.144248	0.25286	0.085553	0.362107
DNK	0.16806	0.157696	0.0495169	0.115269	0.224623	0.0802231	0.393071
MMR	0.223894	0.201396	0.0733752	0.142781	0.331527	0.106361	0.464938
SWZ	0.165788	0.153293	0.0541201	0.109013	0.240061	0.0832621	0.375365
CYP	0.206943	0.194975	0.0707081	0.134986	0.310136	0.094725	0.559065
ROU	0.214107	0.201847	0.0621721	0.143126	0.294167	0.0943194	0.464785
DOM	0.178568	0.171541	0.0487127	0.121593	0.247283	0.0948096	0.354481
BRA	0.176987	0.164809	0.0460887	0.12644	0.243454	0.0885373	0.313038
ITA	0.185656	0.175657	0.056973	0.120409	0.259374	0.0718089	0.350573
SYR	0.229232	0.210361	0.0759619	0.161248	0.323148	0.0977018	0.548626
CHL	0.154339	0.142658	0.0431285	0.100774	0.204139	0.0776016	0.30729
BEL	0.198984	0.185525	0.061682	0.136686	0.276461	0.115088	0.460816
EST	0.175548	0.164578	0.0537548	0.118947	0.24137	0.104076	0.378922
LBN	0.261486	0.258613	0.0735278	0.157995	0.373403	0.138769	0.425868
GIN	0.227324	0.21728	0.0598647	0.158717	0.302483	0.117244	0.500007
BRN	0.17616	0.16857	0.0479381	0.119341	0.234794	0.072712	0.299463
MNG	0.171568	0.164523	0.0486309	0.122145	0.230505	0.0860255	0.375606
PRY	0.178148	0.168277	0.0510756	0.120983	0.237997	0.0868718	0.37863
USA	0.15552	0.152512	0.0402889	0.107112	0.203078	0.0852321	0.311647
RWA	0.200636	0.191228	0.0607625	0.132436	0.271729	0.0808858	0.455314
PRK	0.212658	0.202723	0.0551383	0.153442	0.287412	0.0933139	0.423668
NGA	0.184716	0.177521	0.0489459	0.133595	0.244929	0.0991655	0.412596
BWA	0.150149	0.141572	0.0432896	0.105858	0.216741	0.0702694	0.306804
NOR	0.236355	0.231524	0.0636907	0.161158	0.318398	0.132427	0.460732
BIH	0.251045	0.230021	0.077236	0.169383	0.33977	0.137987	0.536463
BOL	0.227219	0.2234	0.0580448	0.158807	0.299404	0.102565	0.375274
AZE	0.199001	0.18658	0.0560769	0.146036	0.281769	0.0913151	0.385557
BLR	0.267549	0.249311	0.0844292	0.191823	0.366996	0.145303	0.617419
KOR	0.184323	0.172123	0.0550064	0.130521	0.25335	0.0920294	0.38728
RUS	0.206165	0.194585	0.0723757	0.14001	0.269986	0.113199	0.597495
PER	0.187388	0.176778	0.0613703	0.118853	0.260055	0.0855342	0.445172
VNM	0.168539	0.162918	0.0485827	0.106807	0.230659	0.0758327	0.318589
PSE	0.234251	0.217778	0.0708959	0.158033	0.318448	0.106255	0.471664
TUN	0.194289	0.176779	0.0622014	0.134062	0.27364	0.106876	0.463824
NLD	0.181843	0.172757	0.0459896	0.128919	0.24699	0.0969588	0.321441
GTM	0.213431	0.198098	0.0637254	0.133821	0.306107	0.0889144	0.385076
URY	0.141367	0.136821	0.0400285	0.096447	0.189843	0.0817023	0.301377
HRV	0.199711	0.191252	0.0614633	0.124627	0.284396	0.101629	0.386362
IDN	0.176812	0.171979	0.0492363	0.112206	0.247982	0.0976256	0.301208
LAO	0.210942	0.202623	0.0609316	0.142382	0.298444	0.0878679	0.375803
GUY	0.200234	0.194372	0.0543573	0.134661	0.26298	0.0992813	0.349159
SLB	0.198486	0.190645	0.0601093	0.130101	0.292151	0.0977126	0.348792
ISL	0.325626	0.314705	0.0891844	0.226161	0.449856	0.130963	0.591113
MOZ	0.202444	0.195512	0.0573531	0.138842	0.268137	0.101763	0.397464
MLI	0.184806	0.16823	0.0585868	0.12362	0.256699	0.09825	0.371779
PHL	0.170866	0.161363	0.0494836	0.109578	0.236843	0.069129	0.322128
CAN	0.176376	0.171267	0.049044	0.119421	0.236881	0.0769343	0.328909
CMR	0.219818	0.209642	0.0611646	0.148124	0.296512	0.119777	0.391068
FJI	0.189393	0.175935	0.0604219	0.124493	0.28813	0.0837571	0.401204
CIV	0.193173	0.181056	0.0490853	0.135515	0.252192	0.100555	0.342904
TUR	0.247825	0.231557	0.0852564	0.163685	0.362615	0.127288	0.610988
LBR	0.240978	0.236051	0.0706135	0.16444	0.334177	0.124386	0.593924
BEN	0.176339	0.170442	0.0477258	0.125753	0.229949	0.0923802	0.344562

## Sheet: Stats_HTL
	mean	median	std	p10	p90	min	max
CHE	0.153022	0.153709	0.0227385	0.123783	0.179651	0.0927299	0.218122
SLV	0.116155	0.113176	0.0166153	0.0969434	0.139659	0.0801823	0.158321
ARG	0.116587	0.115288	0.0165279	0.0967392	0.14078	0.0807954	0.15682
PAN	0.101536	0.103294	0.0126577	0.0837838	0.118884	0.0758618	0.131597
UKR	0.139465	0.137688	0.0199091	0.115155	0.16712	0.101901	0.200529
GEO	0.0857299	0.0835202	0.010759	0.07326	0.101432	0.0596632	0.116355
CUB	0.135209	0.133108	0.0220291	0.111084	0.159763	0.0957236	0.208608
ECU	0.12445	0.125976	0.0188062	0.100751	0.149906	0.0807233	0.165664
DEU	0.137768	0.137494	0.017864	0.113746	0.157273	0.101945	0.177555
BFA	0.0933332	0.0921416	0.0122447	0.0781261	0.110021	0.0649537	0.128921
MDG	0.0810656	0.0802673	0.0112916	0.0679057	0.0969782	0.0595764	0.110028
KGZ	0.0993963	0.09774	0.0154318	0.0813429	0.123108	0.0759199	0.152594
IRQ	0.111864	0.108588	0.0184874	0.0928779	0.137296	0.0776638	0.16614
SOM	0.113647	0.110965	0.0189761	0.0914938	0.135691	0.0718059	0.17274
NAM	0.0932789	0.0930207	0.0113874	0.0781734	0.108539	0.0676398	0.121149
ARE	0.0960139	0.095284	0.0120006	0.080538	0.110198	0.0696044	0.127059
HUN	0.106808	0.106132	0.0151455	0.0877987	0.125315	0.0769605	0.145659
SEN	0.0736893	0.0750388	0.0114195	0.059513	0.0887691	0.0449834	0.100205
LBY	0.0751628	0.0746606	0.010317	0.0630009	0.0898595	0.0549809	0.100829
SDN	0.130599	0.128451	0.0249748	0.100442	0.165549	0.0867026	0.205366
MYS	0.0818732	0.0825273	0.0127004	0.0657355	0.0969729	0.0530827	0.115687
SUR	0.0971524	0.0952559	0.0147482	0.0822867	0.11607	0.065722	0.147674
BLZ	0.122776	0.12296	0.0168949	0.101583	0.145421	0.0887227	0.172626
SVN	0.127158	0.126473	0.0168042	0.106702	0.148534	0.0866933	0.162635
CZE	0.0950416	0.0958134	0.0125013	0.0797764	0.110091	0.0698971	0.13127
IRN	0.104755	0.101602	0.0156936	0.0873416	0.127836	0.0721881	0.141019
SLE	0.103781	0.100593	0.0173164	0.0838661	0.124861	0.0781603	0.157924
JOR	0.0992838	0.0982529	0.0123742	0.0824773	0.115307	0.073696	0.132272
LTU	0.10909	0.108418	0.0150134	0.0902556	0.127737	0.0807125	0.163427
SWE	0.0911452	0.0908974	0.0110233	0.077461	0.106797	0.0678453	0.117665
POL	0.11533	0.113597	0.0157839	0.0970523	0.135913	0.0821994	0.161521
TZA	0.0836867	0.0822556	0.0126928	0.0684987	0.100439	0.0604412	0.122764
VEN	0.154834	0.151007	0.0260752	0.125393	0.190446	0.100564	0.220327
KEN	0.114303	0.114186	0.0159649	0.0953517	0.135968	0.0862248	0.169493
SVK	0.109433	0.108043	0.0135021	0.0924313	0.128941	0.0812242	0.143346
GBR	0.142786	0.143487	0.018306	0.119059	0.166484	0.103358	0.183586
MAR	0.0836867	0.083568	0.0114861	0.0684813	0.100394	0.0608294	0.108427
AGO	0.0923741	0.0906766	0.0146337	0.0750288	0.113405	0.0656085	0.129468
KWT	0.0782484	0.0769477	0.00853273	0.0675461	0.0914882	0.060525	0.101028
UGA	0.0861402	0.0851518	0.0141101	0.0691467	0.106477	0.0556869	0.125596
KHM	0.0907101	0.0901118	0.0130207	0.0740487	0.10857	0.0676727	0.126412
COD	0.104367	0.102974	0.0155184	0.0851654	0.126353	0.0758923	0.14535
QAT	0.0778811	0.0772392	0.00949652	0.0673192	0.0891603	0.0535689	0.101262
BGD	0.099454	0.096602	0.0139587	0.0844734	0.1201	0.0700118	0.135988
GRC	0.122062	0.122937	0.015416	0.100206	0.141228	0.0912247	0.158604
IND	0.0806282	0.0798824	0.0120728	0.0646757	0.0994861	0.0565764	0.119953
MDA	0.115894	0.113245	0.0166371	0.0964418	0.137145	0.083399	0.165665
GAB	0.115766	0.115226	0.0174404	0.0957556	0.13488	0.0799031	0.17869
MWI	0.099299	0.0966967	0.0174737	0.0804704	0.12284	0.0649487	0.175664
EGY	0.0988001	0.0982939	0.0162701	0.0788411	0.122227	0.0656474	0.140621
MNE	0.117209	0.117877	0.0163815	0.0966049	0.136508	0.0796592	0.161104
ZAF	0.0832191	0.0835765	0.00966444	0.0724316	0.094402	0.0598382	0.109801
MKD	0.107822	0.106281	0.0153002	0.0884318	0.128199	0.0700412	0.14787
BHS	0.107049	0.107147	0.0135752	0.0890049	0.125081	0.0804042	0.137634
ZWE	0.102466	0.100541	0.0178296	0.0823701	0.125173	0.071573	0.154103
IRL	0.130341	0.129026	0.0167876	0.111672	0.151947	0.0997707	0.189784
LKA	0.120049	0.117664	0.019609	0.0937818	0.144602	0.0860006	0.173227
SRB	0.111745	0.11141	0.0150185	0.0919858	0.131117	0.0802021	0.143886
COG	0.111558	0.110714	0.0164913	0.091654	0.134272	0.0767305	0.15761
NZL	0.121886	0.11978	0.0179115	0.100875	0.146538	0.0791976	0.164225
LVA	0.108504	0.108365	0.0131379	0.0904196	0.126474	0.0820725	0.148817
AUS	0.124668	0.123616	0.0173094	0.102077	0.147874	0.0846212	0.161417
FLK	0.116762	0.116649	0.0172282	0.0960009	0.137088	0.0812317	0.166986
ISR	0.105472	0.103837	0.013361	0.0886378	0.123068	0.0774617	0.137045
COL	0.0846612	0.0829656	0.0117927	0.0705204	0.0988177	0.0594946	0.118169
FIN	0.132764	0.13088	0.0180084	0.110317	0.156359	0.102108	0.176004
GMB	0.0770264	0.0760875	0.0117754	0.0627976	0.0934199	0.0557247	0.114258
PRT	0.115682	0.117416	0.0144757	0.097626	0.135464	0.0780401	0.150187
SAU	0.113304	0.113332	0.0152751	0.0938193	0.135753	0.0804259	0.147479
PNG	0.0984391	0.0963288	0.0139312	0.0818553	0.115152	0.0728133	0.151696
JAM	0.101295	0.0996757	0.0133258	0.0846619	0.118476	0.0721835	0.139392
PAK	0.116425	0.117201	0.0175234	0.0904385	0.135962	0.0825899	0.167178
ZMB	0.101181	0.101787	0.0152486	0.0793479	0.118233	0.0692141	0.137408
CHN	0.0677799	0.0666326	0.00989786	0.0567422	0.0781307	0.0418314	0.109889
KAZ	0.0890828	0.0874295	0.0126727	0.0740627	0.107318	0.0621386	0.124415
ARM	0.0987486	0.0971784	0.0126912	0.0845987	0.116094	0.0666376	0.136214
LUX	0.136206	0.135073	0.0188216	0.112204	0.16017	0.0994253	0.192334
ALB	0.105734	0.106041	0.0151617	0.0869231	0.122711	0.0709157	0.146616
HND	0.108101	0.106197	0.0143291	0.0911025	0.127329	0.0769424	0.148826
NIC	0.0883507	0.0859073	0.0139859	0.0737173	0.105813	0.0566734	0.14022
NER	0.0988914	0.0973431	0.0166327	0.0781772	0.123267	0.0659982	0.139049
ETH	0.116834	0.115326	0.0173213	0.0964737	0.142251	0.0804165	0.162341
GRL	0.108546	0.107062	0.0153871	0.0874861	0.12946	0.0792991	0.141151
OMN	0.114647	0.114356	0.0150202	0.0942838	0.135808	0.0823937	0.152654
ESP	0.134538	0.133701	0.0162894	0.11691	0.159372	0.0942708	0.175511
TJK	0.103377	0.102784	0.0135411	0.0873595	0.122641	0.0761775	0.139127
YEM	0.13645	0.134617	0.0214178	0.110125	0.161363	0.0909837	0.199961
THA	0.0784043	0.078422	0.0107659	0.0656714	0.0919002	0.057167	0.100897
UZB	0.0909632	0.0898743	0.0120243	0.0755901	0.110161	0.0678148	0.122692
DZA	0.0809891	0.0813075	0.011422	0.0659713	0.0976927	0.0559642	0.102782
FRA	0.140703	0.139945	0.0173097	0.119192	0.160579	0.111627	0.192041
CRI	0.107391	0.108288	0.0134872	0.089235	0.123725	0.0789598	0.141265
AUT	0.10175	0.100291	0.0107224	0.0885903	0.114481	0.0790904	0.136671
GHA	0.105643	0.103262	0.0176002	0.0855039	0.128108	0.0741849	0.1746
MEX	0.0762597	0.0757896	0.0109054	0.0620365	0.0925979	0.0537052	0.10221
HTI	0.118547	0.117212	0.0186215	0.0945257	0.14262	0.0832675	0.176182
JPN	0.157727	0.155446	0.0196148	0.136562	0.184097	0.116142	0.230967
NPL	0.0959795	0.0942484	0.013169	0.0814797	0.110418	0.0715139	0.144017
BGR	0.110206	0.10969	0.0121861	0.0950608	0.124483	0.084239	0.137492
DNK	0.134885	0.133605	0.0148841	0.116757	0.151362	0.104275	0.177578
MMR	0.113801	0.112946	0.0154129	0.0949522	0.13279	0.0790509	0.157275
SWZ	0.0839028	0.0826388	0.012094	0.0690078	0.100286	0.0540378	0.110817
CYP	0.120182	0.118802	0.0163455	0.0972492	0.141733	0.0901623	0.169265
ROU	0.124735	0.124995	0.0161492	0.103354	0.14779	0.0915121	0.157439
DOM	0.102854	0.10348	0.0125156	0.0877834	0.118931	0.0758366	0.134698
BRA	0.0814927	0.0808779	0.0121622	0.065385	0.0964663	0.0580954	0.115152
ITA	0.106519	0.104661	0.013864	0.0897489	0.124163	0.0802788	0.143136
SYR	0.139235	0.13591	0.0227579	0.112737	0.170341	0.0974	0.213002
CHL	0.0804127	0.0809536	0.0110396	0.0653994	0.0945987	0.0584451	0.11029
BEL	0.133528	0.133099	0.0175206	0.111458	0.156904	0.0887115	0.17585
EST	0.104457	0.103779	0.0124337	0.0876805	0.121959	0.0815054	0.134585
LBN	0.1536	0.149212	0.0242637	0.12464	0.189208	0.106633	0.207909
GIN	0.101604	0.0997734	0.015673	0.0806333	0.120535	0.0710038	0.150317
BRN	0.0929338	0.0916853	0.0113456	0.0807623	0.107134	0.0653988	0.12873
MNG	0.101104	0.0997918	0.0149925	0.0835037	0.120131	0.0731695	0.157471
PRY	0.0872616	0.0866603	0.0112618	0.0731329	0.102331	0.0630242	0.114157
USA	0.10032	0.0984854	0.0121818	0.0857693	0.117436	0.0749273	0.127312
RWA	0.0868444	0.085782	0.0136844	0.071187	0.107075	0.0502726	0.12057
PRK	0.133016	0.130816	0.0211537	0.106618	0.161971	0.0920063	0.196754
NGA	0.0949283	0.0927945	0.015648	0.0785444	0.110425	0.0634026	0.151369
BWA	0.0716194	0.0708456	0.00944764	0.0606021	0.08547	0.0509996	0.0967786
NOR	0.143358	0.145047	0.0201321	0.117932	0.166567	0.0960007	0.204348
BIH	0.124522	0.122655	0.0207878	0.10067	0.152501	0.08147	0.180121
BOL	0.125249	0.12288	0.018551	0.101662	0.150038	0.090124	0.172095
AZE	0.101639	0.100844	0.0131282	0.0852611	0.118764	0.0781393	0.149945
BLR	0.160938	0.156585	0.0265592	0.125984	0.196735	0.104369	0.230497
KOR	0.112021	0.11347	0.0147757	0.0923596	0.13015	0.0742077	0.145879
RUS	0.0960906	0.0958106	0.012412	0.080355	0.112082	0.0686756	0.12666
PER	0.0806316	0.0801656	0.0129858	0.0640186	0.0977361	0.0572509	0.112759
VNM	0.0894459	0.090201	0.0112332	0.0744927	0.103162	0.0624525	0.11376
PSE	0.157968	0.156836	0.0276558	0.121471	0.194574	0.104472	0.231676
TUN	0.103166	0.101655	0.0172785	0.0800209	0.126486	0.0706218	0.143442
NLD	0.127687	0.126679	0.016614	0.107848	0.148572	0.0965269	0.17987
GTM	0.105096	0.105465	0.0146406	0.0866576	0.123039	0.0671176	0.142904
URY	0.0784485	0.0782797	0.0107339	0.0651636	0.0932435	0.0553936	0.103466
HRV	0.11516	0.113978	0.0152946	0.0950606	0.136517	0.0890195	0.154285
IDN	0.0943774	0.0931552	0.0122716	0.0798023	0.11252	0.0732933	0.126931
LAO	0.114756	0.111867	0.0181384	0.0940765	0.138199	0.0828115	0.166383
GUY	0.0823904	0.081584	0.0119661	0.0672836	0.0982857	0.0570864	0.113908
SLB	0.104133	0.0992862	0.0162931	0.0885258	0.128371	0.0721575	0.158787
ISL	0.14612	0.145392	0.0203507	0.117694	0.168293	0.106848	0.209956
MOZ	0.104456	0.102257	0.0159337	0.0861166	0.127571	0.0727403	0.147025
MLI	0.0985953	0.0966301	0.0154448	0.0815185	0.116511	0.06075	0.143033
PHL	0.0810142	0.078412	0.0103229	0.0692416	0.096084	0.0556383	0.105091
CAN	0.125084	0.122959	0.0173471	0.104533	0.148561	0.0935769	0.181465
CMR	0.0999482	0.0987329	0.0158197	0.0821701	0.118002	0.0686746	0.168245
FJI	0.106844	0.105368	0.0146078	0.0862593	0.123625	0.0724134	0.145191
CIV	0.0831033	0.0825788	0.0125984	0.0680929	0.0990994	0.0601627	0.127143
TUR	0.132909	0.131693	0.0189821	0.10903	0.157771	0.0841974	0.174989
LBR	0.1047	0.103326	0.0160441	0.0857274	0.127502	0.0665102	0.148009
BEN	0.0850783	0.0841184	0.0136103	0.0668028	0.101698	0.0561108	0.121565

[truncated: 19 more sheets: Stats_HTSE, Stats_HVO_diesel, Stats_HVO_kerosene, Stats_M_PYR, Stats_PTM, Stats_RWGS_FT_diesel, Stats_RWGS_FT_kerosene, Stats_RWGS_MeOH_methanol, Stats_RWGS_MeOH_DME, Stats_RWGS_MeOH_kerosene, Stats_SMR_CCS, Stats_SOEC, Stats_SR_FT_diesel, Stats_SR_FT_kerosene, Stats_ST_FT_diesel, Stats_ST_FT_kerosene, Stats_TG_CCS, Stats_TG_FT_diesel, Stats_TG_FT_kerosene]
