# Supplementary material for: Global cost drivers and regional trade-offs for low-carbon fuels: a prospective techno-economic assessment
Source: Royal Society of Chemistry journal article supplement (doi:10.1039/d5ee05591a), 2026-01-01
Supplement: d5ee05591a2.zip [file monte_carlo_stats_15deg50.xlsx]

## Sheet: Stats_PEM
	mean	median	std	p10	p90	min	max
CHE	0.101359	0.0967514	0.0300194	0.067744	0.136649	0.0551327	0.223804
SLV	0.0927756	0.0887246	0.0277314	0.0630414	0.129101	0.0422748	0.196358
ARG	0.089903	0.0858497	0.0232348	0.0632303	0.118105	0.0483225	0.171148
PAN	0.0757874	0.0701003	0.0224786	0.0521756	0.105618	0.0403507	0.158386
UKR	0.0947518	0.0908992	0.0301458	0.0612167	0.131075	0.0479454	0.200528
GEO	0.0787628	0.0775131	0.0240045	0.0510657	0.103422	0.0344612	0.175172
CUB	0.0946374	0.0922024	0.0262681	0.0665192	0.123691	0.0448383	0.222834
ECU	0.0962929	0.0883022	0.031474	0.0662731	0.134035	0.0540876	0.231011
DEU	0.0692918	0.0666616	0.0187154	0.049414	0.0964928	0.0374559	0.14847
BFA	0.0735298	0.0717981	0.0191369	0.0523497	0.0954552	0.0285687	0.134174
MDG	0.0668912	0.0639111	0.0194214	0.0451365	0.096912	0.0342081	0.123126
KGZ	0.0800067	0.0745344	0.0232827	0.0547681	0.112139	0.0465984	0.155278
IRQ	0.0683523	0.066584	0.0181183	0.0449527	0.0890051	0.0341858	0.141543
SOM	0.0681371	0.0642806	0.0174336	0.0484842	0.0930848	0.0393869	0.119333
NAM	0.0659312	0.0633743	0.0156733	0.0484793	0.0877748	0.0293227	0.110088
ARE	0.0523091	0.0498077	0.0135563	0.0378144	0.0683557	0.0294226	0.108601
HUN	0.0715717	0.068394	0.0194061	0.0501826	0.0950938	0.0376605	0.146159
SEN	0.0658123	0.0625601	0.0180741	0.0465502	0.0871135	0.0338979	0.138985
LBY	0.0445973	0.0419053	0.0108246	0.0325241	0.0609626	0.0263437	0.0796866
SDN	0.070995	0.0676578	0.0186725	0.0491263	0.0933299	0.0347348	0.131236
MYS	0.0890973	0.085045	0.0260453	0.0608982	0.118696	0.0446541	0.171978
SUR	0.0882426	0.0824095	0.0267631	0.0600098	0.121896	0.0390681	0.161728
BLZ	0.0958724	0.0899956	0.0290813	0.0653049	0.132751	0.0518977	0.195351
SVN	0.0916674	0.0899404	0.0281827	0.0609177	0.123923	0.0450453	0.213666
CZE	0.0745891	0.0702742	0.0229708	0.0501195	0.103202	0.0404931	0.172108
IRN	0.0718122	0.0673675	0.0207486	0.0500713	0.0978921	0.0363785	0.139583
SLE	0.0933038	0.0890893	0.026366	0.0635201	0.122796	0.0493574	0.186313
JOR	0.0561236	0.0517745	0.0162154	0.0384499	0.0742932	0.0258854	0.114697
LTU	0.0651792	0.0633283	0.0150714	0.048501	0.0845659	0.0383459	0.112552
SWE	0.063036	0.0614115	0.0146848	0.0477771	0.0786264	0.0352804	0.117563
POL	0.0677402	0.0646935	0.0177517	0.0464627	0.093399	0.0377242	0.118426
TZA	0.0869347	0.0780671	0.0294998	0.0595761	0.123633	0.0394756	0.207708
VEN	0.124387	0.122592	0.0341326	0.087623	0.16505	0.0615958	0.249836
KEN	0.0730669	0.0710719	0.016668	0.0544662	0.0956318	0.0405805	0.136189
SVK	0.0789465	0.0773815	0.0200718	0.0557342	0.105445	0.0314255	0.144473
GBR	0.0667959	0.0631192	0.0160774	0.048707	0.0928451	0.0383313	0.106395
MAR	0.0498219	0.0477131	0.0136106	0.0335644	0.0676816	0.0243947	0.0997345
AGO	0.0919475	0.0881771	0.0271701	0.06388	0.120366	0.0561408	0.247195
KWT	0.0419525	0.0419692	0.0104314	0.0303515	0.0572874	0.0232493	0.070537
UGA	0.0884856	0.0866565	0.0253663	0.0591795	0.126477	0.0437592	0.168839
KHM	0.0819206	0.0787242	0.0243031	0.0526156	0.113099	0.0368665	0.163018
COD	0.0962364	0.0960494	0.0286423	0.0610525	0.138952	0.0477996	0.177853
QAT	0.04412	0.0428134	0.010638	0.0321318	0.0568283	0.0251761	0.0842081
BGD	0.0786349	0.0756857	0.0210688	0.0544194	0.108247	0.0424443	0.130887
GRC	0.0802497	0.077858	0.0211272	0.055434	0.108586	0.0423192	0.144654
IND	0.0755194	0.072268	0.0233006	0.051581	0.100637	0.0372967	0.179168
MDA	0.0760739	0.0718807	0.0184435	0.05598	0.100987	0.042158	0.144616
GAB	0.100136	0.0916288	0.0311678	0.0704265	0.145881	0.0462142	0.21055
MWI	0.0762558	0.0730274	0.0202258	0.0552292	0.102667	0.0389301	0.137676
EGY	0.0619279	0.0597052	0.0161222	0.0450684	0.0836328	0.0297976	0.120112
MNE	0.0948767	0.0914849	0.0241178	0.0652864	0.124091	0.0506313	0.160609
ZAF	0.0615141	0.0583912	0.0160022	0.0450824	0.0844922	0.0373099	0.117845
MKD	0.0924353	0.0886275	0.0261285	0.0629499	0.122504	0.0418947	0.197413
BHS	0.0676896	0.0639316	0.0219786	0.0469948	0.0913775	0.0386924	0.170266
ZWE	0.0782043	0.06975	0.0252971	0.0542161	0.118168	0.0429283	0.161684
IRL	0.0660818	0.06341	0.0164574	0.0479787	0.0832233	0.031638	0.129317
LKA	0.0823553	0.0806188	0.0205547	0.0576743	0.11219	0.0458189	0.151249
SRB	0.0875349	0.082215	0.0241244	0.0632919	0.116044	0.0482089	0.170024
COG	0.0965872	0.0940226	0.0245609	0.0671559	0.134358	0.0421449	0.161269
NZL	0.0661312	0.0639421	0.0176769	0.0469286	0.0829385	0.0361111	0.16465
LVA	0.0692012	0.0691668	0.0197172	0.0449113	0.0916268	0.0367947	0.133391
AUS	0.0673154	0.0649269	0.0170361	0.047341	0.0889721	0.0347218	0.116296
FLK	0.154755	0.142193	0.0576698	0.0982482	0.223819	0.0596207	0.353842
ISR	0.0606072	0.0589244	0.0163536	0.0442901	0.0769107	0.0339738	0.130487
COL	0.0757443	0.0701087	0.0204305	0.0562348	0.106952	0.03688	0.145348
FIN	0.137511	0.132118	0.043728	0.091973	0.203889	0.0650827	0.291835
GMB	0.0658156	0.0656781	0.0175905	0.0438194	0.0877544	0.0330799	0.13968
PRT	0.0699693	0.0636346	0.022792	0.0486823	0.105345	0.038183	0.162712
SAU	0.0576515	0.0558967	0.0151645	0.0417637	0.0726476	0.0266212	0.131132
PNG	0.0860669	0.0830055	0.02401	0.0607065	0.112016	0.0361315	0.180942
JAM	0.083595	0.0820062	0.0239169	0.0543815	0.11411	0.0419191	0.14945
PAK	0.0855586	0.0826543	0.0233087	0.0602417	0.113646	0.0483228	0.200688
ZMB	0.0857893	0.083012	0.0222851	0.0599584	0.113032	0.0410517	0.161835
CHN	0.0580101	0.0550823	0.016164	0.0409177	0.0851389	0.0313785	0.116206
KAZ	0.0631128	0.0601351	0.0192168	0.0435043	0.0814767	0.033065	0.150194
ARM	0.0836796	0.0761355	0.0259868	0.0577164	0.11594	0.0352436	0.184811
LUX	0.0741555	0.0716748	0.0187834	0.0536042	0.0948933	0.0402419	0.141654
ALB	0.0910677	0.0854261	0.0247605	0.0614985	0.125937	0.0479782	0.159837
HND	0.0897335	0.0851958	0.0296256	0.0573176	0.121354	0.0468373	0.241736
NIC	0.0774756	0.0741546	0.0216004	0.0530226	0.10222	0.0390277	0.180159
NER	0.0619838	0.0605428	0.01624	0.0433253	0.0823988	0.0305457	0.117792
ETH	0.0904042	0.0847924	0.0232735	0.0655997	0.120628	0.0474297	0.171674
GRL	0.141143	0.131241	0.0392896	0.0980043	0.19267	0.0655367	0.258521
OMN	0.0562085	0.0552984	0.0138037	0.0391255	0.0741564	0.0294327	0.0921544
ESP	0.0714536	0.071045	0.0157294	0.04982	0.0901649	0.0396516	0.113909
TJK	0.0785821	0.0745416	0.019536	0.0570778	0.104507	0.0444893	0.135622
YEM	0.0992219	0.0934687	0.0287724	0.0674512	0.144296	0.0436542	0.201101
THA	0.0728262	0.0695759	0.0205975	0.0490961	0.101424	0.0408951	0.145254
UZB	0.0639043	0.0592691	0.0203021	0.0419744	0.0861749	0.0303794	0.152021
DZA	0.0590926	0.0552554	0.0184411	0.0384008	0.0822268	0.0299026	0.13075
FRA	0.0696902	0.0670765	0.0195943	0.0485603	0.0936065	0.0295491	0.136723
CRI	0.0841977	0.080348	0.0230569	0.0584925	0.120978	0.0363701	0.136765
AUT	0.0675407	0.0642436	0.0183487	0.0490131	0.0933905	0.0372732	0.127562
GHA	0.0964134	0.0904751	0.0289887	0.064277	0.128338	0.0484668	0.193638
MEX	0.0685335	0.0643401	0.0189175	0.0495077	0.0910555	0.035426	0.146249
HTI	0.0839817	0.0822172	0.0242314	0.0551058	0.111321	0.0425283	0.166583
JPN	0.113947	0.105948	0.0374668	0.0722467	0.163564	0.0600305	0.258116
NPL	0.0861501	0.0788637	0.0265795	0.0567842	0.119852	0.0491185	0.188768
BGR	0.0805702	0.0768228	0.0205623	0.0565771	0.105134	0.0411347	0.159633
DNK	0.0633038	0.0596074	0.0156705	0.0464798	0.0839845	0.0340524	0.116085
MMR	0.0971053	0.0944209	0.0264033	0.0648214	0.128346	0.0562985	0.2117
SWZ	0.0671797	0.0655934	0.0164716	0.0475056	0.0930016	0.0349525	0.111629
CYP	0.0916571	0.0876924	0.0298375	0.0609043	0.127955	0.0421819	0.224505
ROU	0.0859827	0.0813768	0.0233814	0.0609144	0.11933	0.0471473	0.158986
DOM	0.0758334	0.0734425	0.0221306	0.0507303	0.105547	0.0338396	0.151954
BRA	0.0732572	0.0708624	0.0206372	0.0499601	0.0958393	0.0400711	0.167792
ITA	0.0849608	0.0808949	0.0250336	0.0591479	0.116073	0.0429985	0.212175
SYR	0.070887	0.0695642	0.0179387	0.0506583	0.0929541	0.0252301	0.124423
CHL	0.0553204	0.053153	0.016179	0.0358086	0.076079	0.0271498	0.108176
BEL	0.0710417	0.0671628	0.0190993	0.0516104	0.0939723	0.037657	0.159188
EST	0.0666957	0.062101	0.0203175	0.0439614	0.0915098	0.0320655	0.146042
LBN	0.114782	0.110225	0.0294543	0.0807247	0.149075	0.0617728	0.268453
GIN	0.0958406	0.0897248	0.0315991	0.065224	0.134114	0.0481672	0.234224
BRN	0.0815319	0.0785902	0.023889	0.055078	0.113288	0.0399763	0.165663
MNG	0.0616988	0.061979	0.015952	0.0435946	0.0778732	0.0304196	0.1261
PRY	0.0654484	0.0624488	0.0159453	0.0479108	0.0850764	0.0361624	0.126807
USA	0.0601112	0.0575544	0.0158438	0.0435685	0.083546	0.0257625	0.10352
RWA	0.0830794	0.0754465	0.0245972	0.0578195	0.114938	0.0446765	0.151006
PRK	0.0802239	0.0772596	0.0234654	0.0549265	0.10854	0.0387701	0.157697
NGA	0.0785858	0.0743212	0.0225623	0.0538612	0.104578	0.0357774	0.163915
BWA	0.0609783	0.0574397	0.0185912	0.0416515	0.0825067	0.0332483	0.135832
NOR	0.0960313	0.0935467	0.024904	0.0680668	0.130445	0.0530464	0.177015
BIH	0.111052	0.109155	0.032666	0.0750744	0.15257	0.055638	0.228778
BOL	0.0968418	0.0939106	0.026001	0.067849	0.131374	0.0535113	0.213938
AZE	0.0923356	0.0882829	0.0270724	0.0629897	0.124638	0.0542098	0.211383
BLR	0.10842	0.102236	0.0316513	0.0742398	0.141937	0.0605546	0.239054
KOR	0.0713295	0.0663128	0.0198038	0.049362	0.0991479	0.0390938	0.139743
RUS	0.0680674	0.0647841	0.0182061	0.0464255	0.0953946	0.0292401	0.122341
PER	0.0814632	0.0797173	0.0234617	0.0537419	0.111962	0.0417744	0.14785
VNM	0.0720987	0.0699462	0.0223097	0.0493252	0.0983086	0.0318174	0.170563
PSE	0.0833888	0.0803098	0.0212523	0.0588546	0.106136	0.0414423	0.150471
TUN	0.0671509	0.0661097	0.0178844	0.0466657	0.0877447	0.0338855	0.146476
NLD	0.0653893	0.0636638	0.0152956	0.046643	0.0833478	0.035121	0.112203
GTM	0.0899774	0.0878108	0.0242739	0.0606536	0.122149	0.0439899	0.17284
URY	0.0546129	0.0497286	0.0146723	0.0384373	0.0773463	0.0331616	0.0925942
HRV	0.0818486	0.0788059	0.0233905	0.0549499	0.117203	0.0434397	0.148116
IDN	0.0769052	0.0738101	0.0210778	0.0536108	0.103905	0.0404611	0.141912
LAO	0.081604	0.0756859	0.0235408	0.0580255	0.112448	0.0445756	0.179575
GUY	0.0792951	0.0772938	0.0222099	0.0504219	0.111197	0.0404795	0.158494
SLB	0.0908333	0.0858037	0.0272127	0.061246	0.12565	0.0445199	0.181874
ISL	0.154958	0.145046	0.051642	0.0948415	0.222149	0.0693866	0.335434
MOZ	0.085528	0.0819611	0.0252417	0.0598092	0.117855	0.0442334	0.196537
MLI	0.0647605	0.0639822	0.0155059	0.0473091	0.082222	0.0319742	0.132734
PHL	0.0804027	0.0735763	0.0276483	0.0513339	0.119238	0.0358383	0.17989
CAN	0.0693516	0.0676686	0.0176147	0.0484739	0.0890099	0.0369855	0.134107
CMR	0.0918761	0.0893854	0.0275094	0.060752	0.121755	0.0380785	0.182332
FJI	0.0749396	0.0701238	0.0241509	0.0499165	0.106522	0.0327689	0.185023
CIV	0.0851022	0.0816321	0.0263046	0.0542681	0.120115	0.0401813	0.190293
TUR	0.105442	0.0987986	0.0306648	0.0766875	0.147036	0.0469615	0.246333
LBR	0.0931349	0.091059	0.0236773	0.0598378	0.119904	0.0447443	0.161774
BEN	0.0804485	0.0770115	0.0258366	0.0508227	0.105062	0.0372322	0.164355

## Sheet: Stats_DAC
	mean	median	std	p10	p90	min	max
CHE	0.179119	0.17019	0.0503398	0.120554	0.240235	0.0992683	0.383161
SLV	0.155881	0.14845	0.0491984	0.101392	0.215274	0.061913	0.312476
ARG	0.13448	0.125167	0.0457829	0.0846927	0.19924	0.0463825	0.273851
PAN	0.147147	0.138163	0.0496819	0.0956901	0.212519	0.0657421	0.313403
UKR	0.144821	0.140006	0.0501371	0.0944375	0.201165	0.0571794	0.331258
GEO	0.136598	0.131261	0.0410903	0.0868735	0.188556	0.0626447	0.259629
CUB	0.14745	0.143227	0.0434158	0.0967531	0.206825	0.0780009	0.317399
ECU	0.159557	0.146147	0.0575758	0.1014	0.236738	0.0585031	0.38512
DEU	0.112097	0.109451	0.0259885	0.0798468	0.148872	0.0627466	0.180386
BFA	0.125025	0.116969	0.0466135	0.0708741	0.17503	0.0578335	0.315403
MDG	0.107314	0.0990984	0.0390572	0.0672789	0.16114	0.0480424	0.223109
KGZ	0.138137	0.134672	0.0471657	0.0858655	0.197519	0.0474665	0.286835
IRQ	0.101759	0.0970455	0.0319729	0.0677027	0.139132	0.0458026	0.199533
SOM	0.0932584	0.0878525	0.0276264	0.0637641	0.135649	0.0509613	0.179408
NAM	0.110359	0.105484	0.0353342	0.0711479	0.157069	0.0581864	0.251784
ARE	0.0881669	0.0865017	0.0272105	0.0583742	0.122254	0.0438692	0.188528
HUN	0.130334	0.120376	0.0434649	0.0858843	0.188663	0.0646773	0.293161
SEN	0.11185	0.102669	0.0388764	0.0665184	0.169627	0.0425654	0.20079
LBY	0.0692074	0.065862	0.0228561	0.0455201	0.0920908	0.0320643	0.200035
SDN	0.0748021	0.0728869	0.0238986	0.0478923	0.104355	0.0299179	0.164694
MYS	0.165989	0.150585	0.0615303	0.103745	0.246891	0.0684395	0.3598
SUR	0.163966	0.161512	0.0576275	0.101144	0.245306	0.0603908	0.336686
BLZ	0.163954	0.158844	0.0458341	0.11431	0.222021	0.0759388	0.317389
SVN	0.17466	0.167983	0.057912	0.1062	0.27002	0.0896766	0.31114
CZE	0.129995	0.122255	0.0383176	0.0911488	0.188778	0.0668912	0.231676
IRN	0.123624	0.120477	0.0371616	0.0817768	0.16294	0.0500296	0.266446
SLE	0.165138	0.152479	0.0616459	0.101445	0.248259	0.0639139	0.437881
JOR	0.0945566	0.0874199	0.0326649	0.059828	0.137493	0.0433739	0.230124
LTU	0.118177	0.11396	0.0351425	0.0786904	0.163485	0.0450794	0.218961
SWE	0.115251	0.109619	0.0352995	0.075107	0.167276	0.0509646	0.23494
POL	0.119517	0.115411	0.0382076	0.0814403	0.163273	0.0582787	0.27639
TZA	0.137932	0.132305	0.0474506	0.0859071	0.199566	0.059838	0.319879
VEN	0.198698	0.191412	0.0600195	0.126116	0.267227	0.0840819	0.371976
KEN	0.114679	0.105158	0.0375584	0.0812849	0.163649	0.0516645	0.303766
SVK	0.143275	0.140826	0.0425265	0.0917781	0.199315	0.0634151	0.261351
GBR	0.106929	0.101097	0.0297053	0.0715259	0.151029	0.0594068	0.21141
MAR	0.0797025	0.0741818	0.0250083	0.0549977	0.115339	0.0421019	0.152665
AGO	0.150471	0.13864	0.0515723	0.0953307	0.218154	0.0596898	0.326124
KWT	0.0671026	0.06201	0.022524	0.0407712	0.0983433	0.031065	0.156632
UGA	0.157518	0.151639	0.0505868	0.0969867	0.235254	0.0634919	0.291112
KHM	0.140825	0.131355	0.0465682	0.0872522	0.202768	0.0577108	0.32597
COD	0.153285	0.138598	0.0573375	0.0956931	0.224637	0.0626753	0.370655
QAT	0.0771084	0.0728109	0.0270583	0.046605	0.114282	0.0317752	0.176128
BGD	0.145472	0.133437	0.0488962	0.0997859	0.211792	0.0745679	0.312765
GRC	0.147058	0.140786	0.0459262	0.0914859	0.215656	0.0672648	0.282982
IND	0.133975	0.124141	0.0461722	0.0809259	0.189901	0.0628792	0.349063
MDA	0.119832	0.112976	0.038225	0.0768725	0.172562	0.0587919	0.250877
GAB	0.172256	0.161952	0.0623925	0.108082	0.246443	0.0868829	0.375139
MWI	0.112295	0.110034	0.0372737	0.0667788	0.157604	0.0435575	0.225069
EGY	0.0907628	0.0876032	0.0282146	0.0586402	0.128302	0.0442914	0.173287
MNE	0.169109	0.158149	0.0514841	0.11735	0.239175	0.0746795	0.353449
ZAF	0.102477	0.0996299	0.0342733	0.0672095	0.14647	0.0353255	0.233643
MKD	0.175554	0.164701	0.0510716	0.11832	0.249176	0.0660933	0.291298
BHS	0.114578	0.112265	0.0418576	0.0705936	0.159896	0.0553854	0.322564
ZWE	0.132037	0.125543	0.0513876	0.0802504	0.190473	0.0523048	0.350403
IRL	0.11582	0.113694	0.0295485	0.0838101	0.147866	0.0517118	0.260122
LKA	0.133814	0.126542	0.0429868	0.0857731	0.191767	0.0648065	0.276926
SRB	0.165278	0.158367	0.0492809	0.109744	0.23663	0.0777331	0.290948
COG	0.171522	0.169878	0.0572042	0.0984122	0.239933	0.0725168	0.358692
NZL	0.114178	0.108269	0.03525	0.0772952	0.159104	0.0518688	0.222601
LVA	0.124458	0.118099	0.0392243	0.0785323	0.178975	0.0645357	0.238277
AUS	0.112237	0.108991	0.0296098	0.0741231	0.157183	0.0632101	0.190631
FLK	0.296107	0.284857	0.101537	0.182438	0.439994	0.109792	0.605
ISR	0.0931307	0.0896316	0.0253243	0.063765	0.12468	0.0441543	0.200783
COL	0.124473	0.122154	0.0401466	0.078614	0.174596	0.0559827	0.269818
FIN	0.269978	0.260824	0.0851992	0.169057	0.383048	0.134153	0.554372
GMB	0.106072	0.0967714	0.0387542	0.0654453	0.166817	0.0385277	0.221431
PRT	0.126032	0.12179	0.0394115	0.0820649	0.182153	0.0572111	0.235307
SAU	0.0919538	0.0892703	0.0268711	0.0618545	0.119956	0.0368381	0.194254
PNG	0.157957	0.152192	0.0561843	0.0905376	0.231409	0.0680365	0.349347
JAM	0.139446	0.127058	0.0499208	0.0850622	0.216595	0.056269	0.277072
PAK	0.143728	0.138425	0.0492624	0.0893205	0.21811	0.0495698	0.262
ZMB	0.126208	0.117519	0.043852	0.0784956	0.180901	0.0514813	0.272425
CHN	0.100535	0.096162	0.0334779	0.0616633	0.14496	0.0408756	0.198863
KAZ	0.106605	0.103406	0.0333588	0.0692005	0.144134	0.0486402	0.231784
ARM	0.152231	0.140332	0.0519612	0.0989262	0.21961	0.069182	0.36364
LUX	0.130846	0.124363	0.0373194	0.0883993	0.181783	0.0689425	0.25087
ALB	0.166885	0.151744	0.0623823	0.0995782	0.256017	0.0767421	0.364639
HND	0.151032	0.141313	0.0526517	0.0911698	0.219977	0.0746637	0.330799
NIC	0.131863	0.117003	0.0509043	0.0842839	0.190049	0.053056	0.365219
NER	0.083276	0.0775459	0.0266935	0.0542452	0.116279	0.0410834	0.174982
ETH	0.140727	0.133356	0.047539	0.0919609	0.204873	0.0731343	0.374727
GRL	0.291353	0.270816	0.108172	0.171487	0.415805	0.124829	0.610407
OMN	0.0843537	0.0838512	0.0210681	0.0589603	0.109149	0.0409624	0.156079
ESP	0.131069	0.124642	0.0393405	0.0886945	0.195384	0.0612092	0.232786
TJK	0.123436	0.115656	0.0415228	0.0809213	0.172698	0.0577635	0.334565
YEM	0.155617	0.147505	0.0453192	0.102943	0.214947	0.0794883	0.283825
THA	0.130972	0.129361	0.0362559	0.0897527	0.17209	0.0630889	0.265244
UZB	0.103633	0.10322	0.0335983	0.0616757	0.154152	0.0447993	0.193159
DZA	0.0930536	0.0876794	0.0323686	0.061323	0.137235	0.0431689	0.194738
FRA	0.118095	0.111075	0.0361574	0.0753438	0.168325	0.0589894	0.228171
CRI	0.153089	0.148592	0.0436648	0.104205	0.218628	0.0624611	0.263378
AUT	0.121319	0.117192	0.0412831	0.0794238	0.172969	0.0508752	0.332823
GHA	0.176851	0.163444	0.0639771	0.107314	0.269689	0.0665525	0.347491
MEX	0.128537	0.117636	0.0432464	0.0827874	0.198234	0.0635229	0.284917
HTI	0.131591	0.127682	0.0413773	0.0842696	0.179736	0.0514491	0.268018
JPN	0.216611	0.203384	0.0764394	0.130022	0.325936	0.0989859	0.500584
NPL	0.146911	0.140629	0.0480318	0.0944958	0.206428	0.0562327	0.299827
BGR	0.143861	0.136804	0.0427816	0.0988904	0.18669	0.0583392	0.300242
DNK	0.10045	0.0936922	0.0286103	0.0699764	0.143292	0.0535922	0.201581
MMR	0.162672	0.152399	0.0735035	0.0987631	0.235765	0.0650482	0.601667
SWZ	0.113415	0.106226	0.0422939	0.0649591	0.165458	0.0495735	0.283002
CYP	0.169547	0.16101	0.0543928	0.106522	0.236506	0.0742818	0.35952
ROU	0.159601	0.158248	0.0480008	0.10097	0.230737	0.0771148	0.323346
DOM	0.13827	0.127422	0.0459267	0.0914863	0.205844	0.0712463	0.271963
BRA	0.122621	0.118017	0.0387038	0.0760271	0.182157	0.0610353	0.233031
ITA	0.150018	0.143957	0.0494097	0.0978601	0.206681	0.0581849	0.325727
SYR	0.0823843	0.0795685	0.0212453	0.0570553	0.110765	0.0478865	0.141295
CHL	0.0946569	0.0901208	0.0306459	0.0595349	0.131909	0.046198	0.181707
BEL	0.119781	0.112346	0.0341967	0.0827776	0.159575	0.0687734	0.249737
EST	0.116127	0.110921	0.0361379	0.0785192	0.165768	0.0520182	0.240375
LBN	0.184954	0.166526	0.0721005	0.116576	0.279903	0.0877693	0.490336
GIN	0.162117	0.149199	0.0569384	0.0994655	0.250019	0.0758676	0.322364
BRN	0.154303	0.14489	0.0509873	0.094439	0.215464	0.0646707	0.338498
MNG	0.0969565	0.0915318	0.0327264	0.0592955	0.140328	0.0445599	0.204497
PRY	0.112306	0.103866	0.0380072	0.0712548	0.163935	0.0553477	0.24122
USA	0.108223	0.0956177	0.0388682	0.0710918	0.157517	0.0514226	0.258261
RWA	0.154581	0.142598	0.0532242	0.0977607	0.220757	0.0567944	0.320429
PRK	0.110351	0.104338	0.0366294	0.0685428	0.149717	0.0440485	0.267818
NGA	0.134981	0.132065	0.0458897	0.0814536	0.194132	0.0368501	0.283686
BWA	0.104201	0.102965	0.0317187	0.065789	0.145011	0.0460761	0.189108
NOR	0.160033	0.151426	0.0470403	0.108162	0.217118	0.0843733	0.333672
BIH	0.206278	0.187831	0.0796041	0.119967	0.308866	0.085045	0.493929
BOL	0.162763	0.152746	0.0572723	0.099439	0.237193	0.070251	0.347833
AZE	0.166877	0.162073	0.0506825	0.103446	0.228715	0.0745521	0.334314
BLR	0.146349	0.14173	0.0459739	0.0971156	0.218107	0.0742159	0.308801
KOR	0.120212	0.117716	0.0337089	0.078873	0.166035	0.0592321	0.21191
RUS	0.126408	0.119456	0.0492358	0.0762658	0.185661	0.0491291	0.364829
PER	0.149721	0.146858	0.0479048	0.0872079	0.214627	0.0672239	0.269556
VNM	0.130153	0.121636	0.0453537	0.0796355	0.18892	0.0491605	0.306605
PSE	0.10321	0.100589	0.0303587	0.0676506	0.14578	0.0533122	0.202695
TUN	0.0954501	0.0938497	0.0297397	0.0623559	0.129065	0.0342912	0.230671
NLD	0.107654	0.102399	0.0339246	0.0726045	0.145337	0.0513158	0.301325
GTM	0.156279	0.147201	0.0507186	0.0975959	0.223128	0.0639218	0.338638
URY	0.0876523	0.0817166	0.0293854	0.0576034	0.124022	0.0487561	0.221845
HRV	0.153895	0.151953	0.0475343	0.0916725	0.218459	0.060397	0.276062
IDN	0.146404	0.14611	0.0395802	0.100145	0.199795	0.064896	0.248335
LAO	0.136356	0.130617	0.0440765	0.0867702	0.198351	0.0553797	0.273396
GUY	0.152604	0.143277	0.0519987	0.0930975	0.225711	0.0621884	0.326274
SLB	0.158615	0.141941	0.0637792	0.0994045	0.27066	0.067029	0.370214
ISL	0.328307	0.313929	0.119736	0.195118	0.4963	0.110311	0.807216
MOZ	0.141819	0.133988	0.049373	0.092141	0.194544	0.0626762	0.336871
MLI	0.0877951	0.080882	0.0272367	0.0585001	0.126283	0.0406125	0.179076
PHL	0.129688	0.124489	0.040283	0.0825771	0.184957	0.0544834	0.23617
CAN	0.116813	0.113564	0.0310934	0.0824809	0.158239	0.0680879	0.23167
CMR	0.160557	0.152429	0.0579952	0.0989899	0.244494	0.0723531	0.396808
FJI	0.117959	0.112149	0.0371491	0.0746139	0.160037	0.0501831	0.238501
CIV	0.15087	0.143298	0.0507368	0.0995602	0.215278	0.0594428	0.346378
TUR	0.18424	0.173775	0.0564773	0.12221	0.251804	0.0984549	0.484077
LBR	0.160366	0.153944	0.0548985	0.101774	0.220614	0.070449	0.445864
BEN	0.134312	0.122027	0.0444097	0.0888695	0.195165	0.0551378	0.284613

## Sheet: Stats_AD
	mean	median	std	p10	p90	min	max
CHE	0.113438	0.111995	0.017215	0.0908315	0.136273	0.072395	0.161943
SLV	0.0900918	0.0893505	0.0121848	0.0778877	0.105388	0.0626898	0.123589
ARG	0.0775549	0.0773051	0.0121856	0.0607828	0.0910199	0.0546889	0.117735
PAN	0.0841301	0.0821698	0.011021	0.0712248	0.0981305	0.0637476	0.116802
UKR	0.109856	0.107559	0.0166502	0.0887856	0.131572	0.0768592	0.160338
GEO	0.0747591	0.0740853	0.0100497	0.0625311	0.0875239	0.0547735	0.105323
CUB	0.101026	0.0992759	0.0145799	0.0834422	0.120132	0.0698495	0.153849
ECU	0.0827203	0.0823828	0.0127819	0.0677461	0.0980358	0.0577573	0.117028
DEU	0.114356	0.113657	0.0149648	0.0972522	0.135261	0.0825688	0.152775
BFA	0.0691516	0.067933	0.0104148	0.0571274	0.0822248	0.0467277	0.0978335
MDG	0.0626338	0.0613724	0.0089143	0.053273	0.0736656	0.037643	0.101509
KGZ	0.0824487	0.0823	0.0113973	0.0693528	0.094457	0.0592195	0.119721
IRQ	0.0864937	0.084898	0.0117382	0.0725793	0.100849	0.0647742	0.126369
SOM	0.0768339	0.0758418	0.0134816	0.0597746	0.0936208	0.0536991	0.109759
NAM	0.0646195	0.063432	0.00890842	0.0540735	0.0761811	0.0482047	0.0956068
ARE	0.0797433	0.0788905	0.0100881	0.0674003	0.0914967	0.0571301	0.106592
HUN	0.0874593	0.0852144	0.0108829	0.0752375	0.103537	0.0670022	0.120363
SEN	0.0483159	0.0470265	0.00874499	0.038183	0.0593691	0.0311039	0.0722452
LBY	0.0572968	0.0573498	0.00749015	0.0479274	0.0658982	0.0440667	0.0844819
SDN	0.0815885	0.079591	0.0156046	0.064333	0.103019	0.0506634	0.139728
MYS	0.0570371	0.057067	0.00958875	0.0457415	0.0663638	0.0392228	0.0914755
SUR	0.0688352	0.0670252	0.0122493	0.0531243	0.0862297	0.0425123	0.108287
BLZ	0.096535	0.0940279	0.0136201	0.0803455	0.116131	0.0638018	0.131385
SVN	0.111192	0.108925	0.0146355	0.0944294	0.132	0.0818253	0.160492
CZE	0.0767352	0.0755761	0.0102718	0.0638503	0.0890867	0.0570557	0.11051
IRN	0.0835684	0.0834915	0.0105898	0.070799	0.0976235	0.0588758	0.117281
SLE	0.0748781	0.0745015	0.0118086	0.0607607	0.0910598	0.0522623	0.111682
JOR	0.0800234	0.0789811	0.00982825	0.0684571	0.0932149	0.0542398	0.106828
LTU	0.0891554	0.0879251	0.0116863	0.0740168	0.104938	0.0606065	0.119014
SWE	0.0817948	0.0807074	0.00970222	0.0705327	0.0936649	0.0620085	0.116393
POL	0.093182	0.0911417	0.0130518	0.07787	0.109764	0.0663373	0.129612
TZA	0.065692	0.0658375	0.0079997	0.0559726	0.0759821	0.0475354	0.0850954
VEN	0.0981098	0.0944698	0.0181827	0.0775571	0.122559	0.0698984	0.146141
KEN	0.0996624	0.0985188	0.0126554	0.0832586	0.116869	0.0744821	0.138152
SVK	0.0993447	0.0959308	0.0123286	0.0846368	0.117808	0.0763731	0.128728
GBR	0.123864	0.121561	0.0151939	0.105685	0.146451	0.094479	0.162954
MAR	0.0601138	0.0591486	0.00820848	0.0496506	0.0706429	0.0434011	0.0864622
AGO	0.0694255	0.0683448	0.00989678	0.0583997	0.0828357	0.0496034	0.10061
KWT	0.0675958	0.0658434	0.00800729	0.0576415	0.0778075	0.0523496	0.0920271
UGA	0.0565038	0.0553305	0.0112844	0.0420287	0.0725181	0.0359693	0.0880288
KHM	0.0805593	0.0810947	0.0104171	0.067734	0.0936975	0.0584416	0.115221
COD	0.0849543	0.0834065	0.0115119	0.0729615	0.0989885	0.0548168	0.124866
QAT	0.0677849	0.0665043	0.00813477	0.0586504	0.0788903	0.0520258	0.0884577
BGD	0.0838762	0.0824872	0.0117753	0.0697086	0.0992356	0.0624915	0.131923
GRC	0.103136	0.102248	0.0121697	0.0869342	0.118862	0.0751841	0.135352
IND	0.0613147	0.059346	0.00920178	0.0516707	0.0746745	0.0429103	0.0917406
MDA	0.088667	0.0869575	0.0123658	0.0744863	0.107183	0.0618331	0.125227
GAB	0.0861815	0.0855677	0.012587	0.0704709	0.104007	0.0604443	0.111012
MWI	0.0696518	0.0704058	0.0106367	0.055341	0.0830663	0.0502431	0.0978712
EGY	0.0654378	0.0650158	0.0114899	0.0509803	0.0813764	0.0412567	0.0974223
MNE	0.0951163	0.0936556	0.0125837	0.0799289	0.113122	0.0705675	0.12584
ZAF	0.0621339	0.0619884	0.00865899	0.0517428	0.0726374	0.0440104	0.0867092
MKD	0.087964	0.0862802	0.0127416	0.0717567	0.106333	0.0669606	0.119179
BHS	0.0860748	0.0859413	0.0119827	0.0722662	0.0988848	0.0600594	0.141954
ZWE	0.0723287	0.0698334	0.0113788	0.0597147	0.0861928	0.0534949	0.107339
IRL	0.114362	0.113487	0.0144219	0.0992016	0.132829	0.0775311	0.158645
LKA	0.091967	0.0904142	0.0138483	0.0756936	0.111336	0.0649074	0.123537
SRB	0.0883685	0.088141	0.0119016	0.0741122	0.102774	0.0620602	0.126209
COG	0.0789842	0.0786467	0.0117781	0.0646709	0.093711	0.056932	0.108114
NZL	0.0958204	0.0933973	0.0131356	0.0799464	0.111694	0.0724595	0.132868
LVA	0.0979621	0.0987424	0.0113172	0.0816656	0.114164	0.0754647	0.129269
AUS	0.095494	0.093073	0.0147924	0.0767381	0.115188	0.0650294	0.145792
FLK	0.100189	0.0969324	0.0172704	0.0831887	0.122218	0.0745148	0.182972
ISR	0.084315	0.0845002	0.0108335	0.0702688	0.0984028	0.0632283	0.114875
COL	0.0626766	0.0604753	0.0100227	0.0515981	0.0763224	0.0456768	0.102588
FIN	0.112256	0.111048	0.0146489	0.0967443	0.130044	0.0780237	0.151075
GMB	0.0610229	0.0595248	0.00810083	0.0515586	0.0732176	0.0435359	0.0835344
PRT	0.101837	0.101602	0.0124598	0.0871218	0.118015	0.0742858	0.13501
SAU	0.0890371	0.0879633	0.0107059	0.0768616	0.103908	0.0658559	0.122073
PNG	0.0829452	0.0828853	0.0112343	0.0708303	0.0976127	0.0630864	0.116905
JAM	0.0838591	0.0819802	0.0115146	0.0689616	0.0981524	0.0577503	0.120283
PAK	0.0912146	0.0891762	0.0136888	0.0749429	0.11141	0.0676403	0.133214
ZMB	0.0735242	0.0715865	0.0119392	0.0599324	0.0880485	0.0512561	0.116824
CHN	0.0506284	0.0497505	0.00685778	0.0434002	0.0589014	0.0379237	0.0711925
KAZ	0.0755697	0.0737662	0.00877841	0.0655473	0.0868636	0.055258	0.101141
ARM	0.0825061	0.0810185	0.0106784	0.0693404	0.0970587	0.0609258	0.110293
LUX	0.113267	0.111349	0.0145858	0.09594	0.133933	0.0823974	0.152161
ALB	0.0866438	0.0856567	0.0122255	0.0728916	0.102219	0.0626052	0.137635
HND	0.0879673	0.0871681	0.0120063	0.0727414	0.102298	0.0598779	0.117334
NIC	0.0590682	0.0582431	0.00804922	0.049398	0.0696504	0.0411997	0.0842448
NER	0.0688649	0.0670738	0.0112673	0.0564418	0.0858875	0.0470532	0.100475
ETH	0.0814116	0.081203	0.0124791	0.0668725	0.0976766	0.0575593	0.120993
GRL	0.0951412	0.0934365	0.0130469	0.0794336	0.113249	0.0663592	0.123246
OMN	0.0878721	0.0890506	0.0117751	0.0730907	0.10217	0.0630869	0.11915
ESP	0.119329	0.116868	0.0150869	0.100439	0.139443	0.0882004	0.160955
TJK	0.0814761	0.0802691	0.0117266	0.0664787	0.0966859	0.0619964	0.11805
YEM	0.102781	0.100097	0.0125997	0.0879986	0.120229	0.07625	0.138135
THA	0.057148	0.0561447	0.00889274	0.0467893	0.0680976	0.0391334	0.0887139
UZB	0.0761366	0.0753395	0.00959423	0.0639393	0.0890819	0.0514193	0.103467
DZA	0.0601602	0.058983	0.00859202	0.0513012	0.0728901	0.0451058	0.093748
FRA	0.126414	0.124689	0.0149344	0.105974	0.148782	0.0945656	0.169091
CRI	0.0885895	0.0887743	0.011094	0.0740192	0.102144	0.0665268	0.118032
AUT	0.10022	0.0988406	0.0124407	0.0860913	0.116726	0.0750628	0.143803
GHA	0.0810338	0.0801777	0.0127328	0.0663276	0.0993713	0.0569622	0.114927
MEX	0.0562232	0.0553994	0.00845013	0.0466017	0.0666747	0.0379007	0.0822065
HTI	0.0918168	0.0912499	0.0126943	0.0759906	0.109053	0.0683995	0.121345
JPN	0.147165	0.143425	0.019373	0.124806	0.175844	0.109971	0.199539
NPL	0.0823304	0.081054	0.0106202	0.0696709	0.0967708	0.0628077	0.110365
BGR	0.0993579	0.0996898	0.0122144	0.0843018	0.115495	0.0725961	0.139124
DNK	0.126215	0.123958	0.0159003	0.109127	0.148134	0.0963341	0.167632
MMR	0.0900457	0.0890538	0.0113228	0.0758914	0.106397	0.0616693	0.116674
SWZ	0.0630854	0.0617201	0.00967412	0.0523259	0.0759986	0.0437297	0.0958609
CYP	0.105942	0.103342	0.0130349	0.0903054	0.125583	0.0817616	0.137653
ROU	0.107166	0.104876	0.0134028	0.0919045	0.12281	0.0816938	0.161479
DOM	0.085579	0.083628	0.0103034	0.0750409	0.0982643	0.0668384	0.122923
BRA	0.0606847	0.0605423	0.0091555	0.0489637	0.0730719	0.0405977	0.0857201
ITA	0.0891905	0.0885894	0.0115808	0.0747648	0.105251	0.0658854	0.126861
SYR	0.094584	0.0921321	0.0163038	0.077167	0.117296	0.0660633	0.157475
CHL	0.0596617	0.0591351	0.00775032	0.0506064	0.0697805	0.0447401	0.0778834
BEL	0.111732	0.109758	0.0152518	0.0964848	0.131217	0.077812	0.150869
EST	0.0961674	0.0949128	0.0116779	0.0806583	0.112816	0.0731576	0.126069
LBN	0.112567	0.110918	0.0168225	0.092545	0.135049	0.077894	0.157978
GIN	0.0742053	0.0726186	0.0127465	0.0614994	0.0898069	0.0456627	0.117505
BRN	0.0808674	0.0791288	0.0110916	0.0684004	0.0965787	0.0555028	0.107259
MNG	0.0816679	0.0802128	0.0117744	0.0680421	0.0952316	0.0618721	0.131454
PRY	0.0640496	0.0627013	0.00864684	0.053888	0.0753125	0.0455757	0.0946539
USA	0.0866369	0.0851165	0.00988533	0.0743785	0.0989254	0.0694586	0.110677
RWA	0.0650028	0.0630437	0.00905399	0.0552371	0.0776643	0.0483616	0.0926181
PRK	0.0993374	0.0984771	0.0141124	0.0816325	0.116157	0.0644251	0.145285
NGA	0.0688925	0.0672161	0.0114588	0.0552417	0.0835962	0.0469175	0.114258
BWA	0.0573692	0.0571255	0.00720396	0.0481305	0.0646762	0.0431421	0.0855577
NOR	0.106076	0.104191	0.0165721	0.0874004	0.126337	0.0710499	0.15789
BIH	0.0962627	0.0947212	0.0117473	0.0829112	0.112319	0.0753982	0.124893
BOL	0.0813401	0.0793073	0.0134921	0.0650338	0.0994996	0.0598049	0.127988
AZE	0.0850099	0.0841737	0.0106987	0.0724025	0.100144	0.060529	0.119052
BLR	0.11218	0.11064	0.0170205	0.0910445	0.135908	0.07974	0.154757
KOR	0.0845461	0.0824013	0.0122294	0.06938	0.0994427	0.0617069	0.117265
RUS	0.0789799	0.0767083	0.0102042	0.0679419	0.0948115	0.0539159	0.103418
PER	0.0606431	0.0604133	0.00934261	0.0494585	0.0737494	0.042328	0.0883645
VNM	0.0725728	0.0714231	0.0106884	0.0592433	0.0859178	0.0540946	0.103618
PSE	0.106571	0.104489	0.0179223	0.0863461	0.131636	0.0732042	0.169712
TUN	0.0712105	0.0711798	0.0114961	0.0560753	0.0847963	0.0500541	0.115815
NLD	0.104241	0.102103	0.014597	0.0883691	0.125563	0.0745255	0.142411
GTM	0.0865544	0.0853674	0.0116141	0.0699239	0.101211	0.0646747	0.117395
URY	0.0572625	0.0567973	0.00797179	0.0469748	0.068143	0.0428897	0.0818072
HRV	0.103869	0.101607	0.01258	0.0871104	0.12029	0.078466	0.138828
IDN	0.0763422	0.0751537	0.0111587	0.0626079	0.0909844	0.0509933	0.109588
LAO	0.0918546	0.0918344	0.014624	0.0734414	0.112135	0.0606496	0.132352
GUY	0.0624455	0.0618595	0.0082959	0.0538579	0.0735297	0.0436815	0.0834729
SLB	0.0875851	0.0862773	0.0128685	0.0728412	0.105531	0.062552	0.131348
ISL	0.116666	0.112966	0.0189625	0.0944674	0.143654	0.0779029	0.179319
MOZ	0.0693868	0.0684552	0.0103039	0.0584776	0.083096	0.0434062	0.0937968
MLI	0.0683337	0.0671183	0.0101158	0.056784	0.0822671	0.0470443	0.0912007
PHL	0.0693854	0.0684782	0.00913764	0.0576593	0.0809041	0.0508035	0.0993046
CAN	0.103322	0.101017	0.0138559	0.0865518	0.122375	0.0729518	0.142128
CMR	0.0708976	0.0698649	0.0118774	0.0565731	0.0885699	0.0480935	0.108216
FJI	0.0865537	0.0859766	0.0124555	0.0713474	0.102901	0.0671723	0.123602
CIV	0.0652214	0.0655285	0.00962009	0.0535752	0.0777775	0.0475949	0.0935868
TUR	0.103594	0.0994831	0.0156942	0.0852828	0.127428	0.0741872	0.148027
LBR	0.074452	0.0752309	0.0111527	0.0598309	0.0885385	0.0513954	0.114007
BEN	0.0640461	0.0625785	0.00985535	0.0508778	0.0771333	0.0478976	0.0891152

## Sheet: Stats_AE
	mean	median	std	p10	p90	min	max
CHE	0.0868674	0.0822035	0.0279738	0.0571196	0.120029	0.0396245	0.231899
SLV	0.0825639	0.0802227	0.0219736	0.0585814	0.111559	0.0403431	0.165598
ARG	0.0812273	0.0781931	0.0255538	0.0572228	0.106838	0.0415675	0.247022
PAN	0.0760404	0.0700121	0.0279867	0.0465012	0.108898	0.0312787	0.203307
UKR	0.0827645	0.0776487	0.0247056	0.0571591	0.117115	0.0427593	0.168932
GEO	0.0731453	0.0696883	0.0185369	0.0516621	0.0994237	0.0365023	0.134324
CUB	0.0887644	0.0857727	0.0230253	0.0628807	0.117505	0.0477695	0.178226
ECU	0.0964677	0.0920675	0.0247497	0.0697593	0.130919	0.0419713	0.170256
DEU	0.0578292	0.0550318	0.0128102	0.0444102	0.0767972	0.0377698	0.0947278
BFA	0.0681046	0.0657459	0.0171339	0.0463755	0.0897196	0.0352011	0.122538
MDG	0.0632678	0.0609134	0.0199581	0.0421352	0.081588	0.0332199	0.172662
KGZ	0.078566	0.074522	0.02036	0.0556708	0.104921	0.0334496	0.13821
IRQ	0.0595012	0.0579544	0.0124114	0.0423281	0.0773132	0.035965	0.0917135
SOM	0.0613997	0.0574336	0.0168323	0.0443838	0.0834905	0.0317809	0.130825
NAM	0.0637996	0.0611954	0.0187836	0.0441744	0.0858043	0.0282094	0.131878
ARE	0.0487303	0.0468032	0.012602	0.0335145	0.0651414	0.0257165	0.0793581
HUN	0.0662889	0.0636153	0.0176932	0.0471341	0.088914	0.0293633	0.133405
SEN	0.0604344	0.0598468	0.0169209	0.0410162	0.0830528	0.0316899	0.124722
LBY	0.0416364	0.0384642	0.0118945	0.0294579	0.0569148	0.0214016	0.08662
SDN	0.0670226	0.0648894	0.0154599	0.0484198	0.0875426	0.0359804	0.117492
MYS	0.0875458	0.0834844	0.027112	0.0589544	0.120606	0.0456249	0.209498
SUR	0.0837806	0.0785802	0.0243676	0.0579918	0.113772	0.0393883	0.16871
BLZ	0.0876158	0.0832036	0.0263391	0.0620882	0.118123	0.0433681	0.191116
SVN	0.0810001	0.0784517	0.0222787	0.0537828	0.10863	0.0436323	0.164425
CZE	0.0683168	0.0641529	0.0197477	0.0439686	0.0973743	0.0387836	0.121289
IRN	0.0687805	0.0687293	0.0186741	0.0449686	0.0933926	0.0324428	0.133318
SLE	0.0870529	0.0863439	0.0220569	0.060965	0.115603	0.0486684	0.148037
JOR	0.0508151	0.0487425	0.0124591	0.0363155	0.0681028	0.0279827	0.0913085
LTU	0.0612922	0.0595017	0.0155724	0.043488	0.082868	0.0335039	0.116727
SWE	0.0570639	0.0547266	0.0153211	0.0372819	0.0764247	0.0263984	0.104436
POL	0.0604544	0.059391	0.016711	0.0414491	0.0789172	0.0300563	0.132604
TZA	0.0769553	0.0748527	0.0231993	0.0495878	0.106215	0.0343147	0.152581
VEN	0.115974	0.11391	0.0315469	0.0847179	0.15174	0.0517128	0.273413
KEN	0.0713899	0.06831	0.0197833	0.0504154	0.0939644	0.0292384	0.145321
SVK	0.0721478	0.0677982	0.0205178	0.0496539	0.101563	0.0384396	0.13052
GBR	0.0563738	0.0535328	0.0153035	0.0394048	0.0790607	0.0325116	0.117427
MAR	0.0454931	0.0437318	0.0107155	0.0342806	0.0592433	0.0258611	0.0778207
AGO	0.0873718	0.0826204	0.028059	0.0585731	0.123746	0.0339862	0.198519
KWT	0.0374111	0.0367441	0.00695195	0.0299432	0.0477458	0.0234394	0.0541375
UGA	0.0853005	0.0811308	0.0245945	0.0595698	0.111328	0.0363378	0.202042
KHM	0.0758812	0.0737407	0.0203381	0.0511735	0.101907	0.03647	0.137445
COD	0.0865736	0.0814848	0.0241441	0.0591552	0.119232	0.0464916	0.168036
QAT	0.0407948	0.0383176	0.0124785	0.0286967	0.0538674	0.0241393	0.100114
BGD	0.0814133	0.0782876	0.0221488	0.0541801	0.112263	0.0424486	0.138573
GRC	0.076045	0.0733284	0.0201138	0.0510408	0.0988478	0.0398593	0.145811
IND	0.0696495	0.0687523	0.0185109	0.0484822	0.089487	0.0336444	0.1421
MDA	0.0706531	0.0638444	0.0241331	0.0471189	0.107296	0.0259773	0.150902
GAB	0.0885627	0.0848472	0.0258744	0.0609997	0.125845	0.0445343	0.175961
MWI	0.0729508	0.0718885	0.0168487	0.052813	0.0946851	0.0392714	0.121109
EGY	0.0577249	0.0555669	0.0146217	0.0410585	0.0743871	0.0354762	0.107845
MNE	0.091441	0.0818877	0.0291042	0.0632973	0.127022	0.0461992	0.203631
ZAF	0.05641	0.0554359	0.0155607	0.0376638	0.0753858	0.0289496	0.10164
MKD	0.0888211	0.0843763	0.0252395	0.0625321	0.114513	0.044027	0.197654
BHS	0.0605468	0.0584057	0.0154941	0.0442499	0.0799139	0.0331262	0.122225
ZWE	0.0751254	0.0742825	0.0144528	0.0582888	0.0938005	0.0444447	0.115527
IRL	0.0586187	0.0580379	0.0128813	0.0422205	0.0754219	0.0283918	0.0974142
LKA	0.077498	0.0751378	0.0188065	0.0574495	0.102584	0.0435512	0.13981
SRB	0.0844285	0.0857571	0.0236498	0.0563939	0.115095	0.0353254	0.175081
COG	0.0905242	0.0900291	0.0261553	0.0604981	0.124326	0.0468401	0.187585
NZL	0.0583593	0.0550823	0.0142052	0.0420008	0.0780059	0.0272284	0.102024
LVA	0.0627038	0.060907	0.0148469	0.0454115	0.0805987	0.0318309	0.108382
AUS	0.0555141	0.0550458	0.0133397	0.042161	0.0681872	0.0312544	0.130559
FLK	0.143526	0.132676	0.0500793	0.0918083	0.20286	0.0537769	0.354294
ISR	0.051411	0.0490946	0.0130369	0.0364996	0.0690578	0.0256632	0.086984
COL	0.0658468	0.0621522	0.0187726	0.0450768	0.0955519	0.0358581	0.131809
FIN	0.12166	0.118076	0.037634	0.0794148	0.17306	0.0517237	0.249176
GMB	0.063839	0.0617338	0.018899	0.0419797	0.0874449	0.0335002	0.127565
PRT	0.0626842	0.0583415	0.0173634	0.0444634	0.0823249	0.0322539	0.137932
SAU	0.0481651	0.0472864	0.0118194	0.0333671	0.0627443	0.026305	0.0800715
PNG	0.0836857	0.0784808	0.0275389	0.0578872	0.114727	0.0385611	0.226242
JAM	0.0718282	0.0682785	0.0186865	0.052547	0.0995639	0.0404433	0.132788
PAK	0.0801908	0.0775839	0.0229469	0.0544296	0.104064	0.0354085	0.15688
ZMB	0.0787054	0.0757433	0.0176928	0.0549081	0.101907	0.0388472	0.123616
CHN	0.0536411	0.0504628	0.0164664	0.0358554	0.078283	0.0252707	0.0998305
KAZ	0.0563716	0.0544049	0.0147691	0.0401535	0.0751679	0.0301371	0.132373
ARM	0.0743032	0.0714953	0.0206728	0.0499451	0.103188	0.0377304	0.133508
LUX	0.0638442	0.0630997	0.0151337	0.0452786	0.0851577	0.0318863	0.11106
ALB	0.0784521	0.0734172	0.0224509	0.0530891	0.111995	0.038414	0.148304
HND	0.0797396	0.0770648	0.0187541	0.0580487	0.101624	0.0386585	0.132684
NIC	0.0723347	0.0695005	0.0196507	0.0519661	0.0980461	0.0333387	0.125282
NER	0.0584766	0.0573661	0.0129725	0.042242	0.0753592	0.0327216	0.103052
ETH	0.082849	0.0765896	0.0249486	0.0580664	0.112551	0.0414878	0.176953
GRL	0.128928	0.12335	0.0362267	0.0871983	0.179037	0.0572721	0.217418
OMN	0.0493736	0.0456956	0.0118234	0.0365739	0.0654939	0.0276664	0.0853444
ESP	0.0656816	0.0638221	0.0168369	0.0463778	0.087114	0.0393	0.122575
TJK	0.0765885	0.0747179	0.0209543	0.0524631	0.104617	0.0409694	0.149059
YEM	0.0907442	0.0825079	0.0250583	0.0648212	0.124821	0.0542501	0.16869
THA	0.0707491	0.068926	0.0209771	0.0463247	0.100055	0.0306441	0.134588
UZB	0.0600091	0.0573658	0.0178718	0.0395499	0.083104	0.0307037	0.113722
DZA	0.0549904	0.0524068	0.0135368	0.0397196	0.0757408	0.0295666	0.0916574
FRA	0.0604579	0.0565236	0.0163037	0.043895	0.0839596	0.0339503	0.121142
CRI	0.0840066	0.0836556	0.022476	0.0576646	0.11571	0.0390784	0.155003
AUT	0.0672953	0.0622621	0.0232581	0.0432123	0.0914052	0.0294796	0.170501
GHA	0.091927	0.088301	0.0270371	0.0626505	0.126467	0.0429645	0.200552
MEX	0.066998	0.0616269	0.0206287	0.0453479	0.0974143	0.0299248	0.130534
HTI	0.0763752	0.072199	0.0188406	0.0578457	0.100424	0.0367831	0.13658
JPN	0.10198	0.096942	0.0299946	0.0696781	0.145749	0.0529963	0.196906
NPL	0.0780615	0.0769292	0.023439	0.0534204	0.1042	0.0399022	0.188723
BGR	0.0772555	0.071767	0.0228287	0.0521708	0.111026	0.0424219	0.130165
DNK	0.0517066	0.0486408	0.0157935	0.0353292	0.0681274	0.0246983	0.128827
MMR	0.0897881	0.0869485	0.0221278	0.0646292	0.118026	0.0452722	0.156389
SWZ	0.064495	0.0611208	0.0165946	0.0471528	0.088132	0.0299963	0.116748
CYP	0.0834307	0.078506	0.0210996	0.0590079	0.11839	0.0462919	0.139351
ROU	0.0821487	0.0772545	0.0231739	0.0551476	0.108891	0.0413121	0.159964
DOM	0.0696743	0.0666903	0.0198029	0.0475386	0.0918665	0.0253547	0.163623
BRA	0.0696569	0.0655374	0.0210623	0.0482264	0.097675	0.0291929	0.159062
ITA	0.0778822	0.0737436	0.0229719	0.0536659	0.111344	0.0434558	0.159585
SYR	0.0691748	0.068152	0.0193369	0.0454714	0.0917398	0.0340608	0.128414
CHL	0.0491258	0.0476124	0.0122028	0.0342517	0.0629834	0.0286582	0.0918401
BEL	0.0609302	0.056405	0.0186607	0.0403309	0.0844775	0.0309467	0.127942
EST	0.0626263	0.0608651	0.0173684	0.0415181	0.0840554	0.0284648	0.126563
LBN	0.110801	0.105516	0.0302788	0.0799664	0.146832	0.0514517	0.203973
GIN	0.0922387	0.0855575	0.0298156	0.0605627	0.128702	0.0442377	0.212946
BRN	0.0745685	0.0726391	0.0197513	0.0518231	0.101231	0.0424881	0.137007
MNG	0.0566585	0.0550072	0.0130018	0.0404839	0.075329	0.0320598	0.0924566
PRY	0.0586805	0.0550734	0.0155128	0.0419953	0.0826513	0.0322659	0.118831
USA	0.0570255	0.0545631	0.0157627	0.0382399	0.0755984	0.0277439	0.104791
RWA	0.0797162	0.0754247	0.021822	0.0556443	0.109171	0.0357569	0.141218
PRK	0.073438	0.071824	0.0184771	0.0544449	0.0971695	0.0366885	0.125011
NGA	0.0725519	0.0681061	0.0197459	0.0511096	0.103243	0.0345618	0.132779
BWA	0.0545298	0.0516155	0.0160364	0.037093	0.0780604	0.0238982	0.103335
NOR	0.079734	0.0777421	0.0236251	0.0557086	0.111412	0.0397571	0.182909
BIH	0.100449	0.0966119	0.0261771	0.0681446	0.139563	0.0537553	0.169404
BOL	0.0876125	0.0837515	0.0221644	0.0603249	0.109403	0.0450407	0.178346
AZE	0.0778576	0.0772187	0.020739	0.0575338	0.102017	0.0413484	0.176198
BLR	0.0989862	0.0948059	0.0261966	0.0675023	0.133035	0.0528793	0.194938
KOR	0.0618265	0.0594364	0.0159657	0.0448932	0.0810511	0.0323997	0.132851
RUS	0.0699839	0.0675906	0.0199487	0.0467592	0.0939003	0.0271981	0.150373
PER	0.0715727	0.0688171	0.0206868	0.05007	0.0931012	0.0320028	0.154032
VNM	0.0683269	0.0654932	0.0174987	0.045615	0.0962012	0.0357985	0.12476
PSE	0.0759226	0.0745138	0.0180158	0.0543582	0.101899	0.0480409	0.131827
TUN	0.06142	0.0598394	0.014748	0.0421728	0.0808257	0.0295054	0.095339
NLD	0.0546118	0.0513904	0.0139077	0.0404052	0.0730829	0.0338391	0.107892
GTM	0.0795208	0.0750944	0.0266493	0.05356	0.106196	0.0406819	0.247948
URY	0.0487301	0.0470844	0.0123404	0.0344383	0.063224	0.0243991	0.0980206
HRV	0.0783432	0.0744674	0.0245013	0.0501733	0.110212	0.0382488	0.156324
IDN	0.0701812	0.0681709	0.0195373	0.0509536	0.10096	0.0389654	0.133644
LAO	0.0835742	0.0799133	0.0284976	0.05427	0.115898	0.0428977	0.197341
GUY	0.0782573	0.0730988	0.023758	0.0515502	0.109789	0.0345082	0.163645
SLB	0.0847321	0.0835828	0.0245583	0.0542393	0.115738	0.0417553	0.160373
ISL	0.141252	0.127485	0.0535873	0.0911963	0.200533	0.0628538	0.428497
MOZ	0.0792284	0.077083	0.0208711	0.0560266	0.105654	0.042338	0.155983
MLI	0.0573781	0.0552732	0.0139671	0.0398961	0.076313	0.0290121	0.0891498
PHL	0.0738543	0.072385	0.0224383	0.0489825	0.103774	0.034129	0.155579
CAN	0.0566086	0.0539325	0.0134376	0.0413826	0.0748871	0.0328768	0.104495
CMR	0.0867066	0.0845636	0.0247136	0.0598254	0.117689	0.0381567	0.18887
FJI	0.064218	0.0603742	0.017432	0.0449924	0.0924734	0.035247	0.115671
CIV	0.0782109	0.0736754	0.0211659	0.0560761	0.104931	0.0349758	0.15386
TUR	0.0939907	0.0930267	0.0265579	0.0588771	0.124513	0.050243	0.180524
LBR	0.0929266	0.0906704	0.0246499	0.0661223	0.131673	0.0541632	0.164989
BEN	0.076954	0.0727109	0.0202325	0.0548229	0.105921	0.0433862	0.14028

## Sheet: Stats_ATR_CCS
	mean	median	std	p10	p90	min	max
CHE	0.0741668	0.0720415	0.0170339	0.0548318	0.093593	0.0435943	0.131595
SLV	0.0555908	0.0544786	0.013085	0.0404444	0.0702404	0.0349385	0.105246
ARG	0.0637133	0.0617026	0.0149671	0.047303	0.0844241	0.0359487	0.108605
PAN	0.0532255	0.0498169	0.0146112	0.0376889	0.0696681	0.0299345	0.111715
UKR	0.0637906	0.0617187	0.0154143	0.0469749	0.0820806	0.03511	0.115774
GEO	0.0442831	0.04287	0.0121125	0.0316539	0.0570296	0.0231822	0.0979057
CUB	0.0653402	0.0621833	0.0149493	0.0497035	0.084567	0.0311777	0.112298
ECU	0.0652384	0.0635021	0.0153899	0.046653	0.0849944	0.0343136	0.10882
DEU	0.0823006	0.0788483	0.022434	0.0553857	0.111202	0.0434445	0.173381
BFA	0.0511244	0.0484138	0.0124215	0.0366424	0.0700238	0.0286526	0.0840488
MDG	0.047321	0.0443958	0.0120517	0.0345925	0.0633019	0.0274001	0.0871317
KGZ	0.0530969	0.0497359	0.0167888	0.0352201	0.0743969	0.0296127	0.137017
IRQ	0.0563965	0.0548975	0.0130155	0.0404394	0.0736403	0.0323734	0.0886197
SOM	0.0589423	0.0560055	0.0141332	0.044325	0.0793036	0.0348697	0.112759
NAM	0.0522321	0.0516834	0.0133692	0.0376112	0.0693689	0.0275302	0.112719
ARE	0.050582	0.049379	0.0109276	0.0376114	0.0642696	0.0323824	0.0836497
HUN	0.0713411	0.0642161	0.0230667	0.0473455	0.102074	0.0340039	0.155804
SEN	0.0483379	0.0447349	0.0143475	0.0351189	0.0648892	0.0248574	0.0945874
LBY	0.0454947	0.0429797	0.0119148	0.03334	0.0660912	0.0250962	0.0822799
SDN	0.0662303	0.0629862	0.0194722	0.0454411	0.0894636	0.0310252	0.13449
MYS	0.0515847	0.0493631	0.0133066	0.0376758	0.0703218	0.030329	0.0955601
SUR	0.0532043	0.0517513	0.0138577	0.0380367	0.0736173	0.0272224	0.0919563
BLZ	0.0602276	0.0576383	0.0134959	0.0457973	0.0789072	0.0333077	0.114732
SVN	0.0803074	0.0793272	0.021159	0.0563847	0.104657	0.0364628	0.162892
CZE	0.0677465	0.0637709	0.0197176	0.0440471	0.0958937	0.0340917	0.133278
IRN	0.0560281	0.054705	0.0138478	0.0400815	0.0722016	0.031073	0.10542
SLE	0.0536133	0.0531354	0.0120423	0.038917	0.0693294	0.031116	0.088684
JOR	0.0501415	0.0485388	0.0127951	0.0355035	0.0660319	0.0254126	0.0933232
LTU	0.0748887	0.0703148	0.0221859	0.0499664	0.103889	0.0325355	0.165575
SWE	0.0709974	0.0649115	0.0286236	0.0449662	0.104194	0.0331437	0.212455
POL	0.0754519	0.0747957	0.0186384	0.0541519	0.0980749	0.0407859	0.136795
TZA	0.049784	0.0480778	0.012514	0.0368752	0.0644297	0.028326	0.0977832
VEN	0.0760661	0.0737712	0.0182717	0.056206	0.0994149	0.040007	0.140707
KEN	0.052089	0.050529	0.0127538	0.0373145	0.0675087	0.0285286	0.0895511
SVK	0.0678384	0.0647035	0.0181547	0.0474492	0.0913277	0.0377015	0.129622
GBR	0.0633686	0.0612894	0.0156779	0.0468713	0.082689	0.0362074	0.139503
MAR	0.0482701	0.044962	0.0138962	0.03416	0.068148	0.0283935	0.109444
AGO	0.0525748	0.0506748	0.0145519	0.0345668	0.0710005	0.0293795	0.107835
KWT	0.0421901	0.0406264	0.0125115	0.0284714	0.0600772	0.0211439	0.0982513
UGA	0.0506427	0.0501597	0.0136558	0.0350506	0.0697748	0.0277467	0.097554
KHM	0.0472854	0.0466478	0.011838	0.0330442	0.0614754	0.0251993	0.084121
COD	0.0534785	0.0524721	0.013399	0.0388373	0.0687431	0.0292552	0.0992326
QAT	0.0419261	0.0381187	0.0143004	0.0288109	0.0609945	0.0208698	0.0896357
BGD	0.0524864	0.0506955	0.015037	0.036072	0.0709266	0.0242967	0.115255
GRC	0.0778598	0.0762205	0.0196218	0.057369	0.103043	0.0396911	0.156488
IND	0.0447759	0.0424305	0.0125204	0.0309749	0.0620219	0.0267622	0.0829939
MDA	0.0558486	0.054112	0.0136067	0.0405188	0.0706772	0.0303807	0.101596
GAB	0.0601427	0.0588436	0.0135602	0.0431529	0.0764305	0.0309036	0.100131
MWI	0.0538881	0.0534568	0.012603	0.0379025	0.068772	0.0272094	0.0972795
EGY	0.0564345	0.0533959	0.0135342	0.0426369	0.0728933	0.0317561	0.106523
MNE	0.0581719	0.056363	0.0125849	0.0438231	0.0755648	0.0342481	0.104519
ZAF	0.0476273	0.046119	0.0122544	0.0338369	0.0663245	0.0260086	0.0757699
MKD	0.0541664	0.051207	0.0116108	0.0416477	0.0709774	0.0299942	0.08706
BHS	0.0565482	0.0531171	0.0161715	0.0404859	0.0736725	0.0260046	0.12193
ZWE	0.0560616	0.0532711	0.0154489	0.0411648	0.0786914	0.0304453	0.132894
IRL	0.0764553	0.0727296	0.0213294	0.0528468	0.106305	0.0356675	0.150307
LKA	0.0575328	0.055234	0.015921	0.0391455	0.0793846	0.0254268	0.1058
SRB	0.0567689	0.0545912	0.0145626	0.0413676	0.0795967	0.0331203	0.0976272
COG	0.0580843	0.0557448	0.0139401	0.0421465	0.0740832	0.0378633	0.127749
NZL	0.0631615	0.059593	0.0178457	0.0463483	0.0831236	0.0372804	0.169623
LVA	0.0719802	0.068205	0.0209562	0.048082	0.101808	0.0374584	0.134799
AUS	0.0638745	0.0620094	0.0157652	0.0441321	0.0852051	0.0358947	0.111879
FLK	0.0584391	0.0574425	0.0137103	0.0448027	0.080224	0.0352031	0.113007
ISR	0.053516	0.0517521	0.0120773	0.0389331	0.0700197	0.0317484	0.0915941
COL	0.0493888	0.0477072	0.0122073	0.0363365	0.0666444	0.0275353	0.0864529
FIN	0.0776948	0.0724194	0.0207989	0.0568613	0.0981394	0.0458955	0.179883
GMB	0.0447073	0.0436573	0.0101046	0.0315544	0.0585949	0.0255404	0.0713997
PRT	0.0727082	0.0701801	0.0182822	0.0514971	0.0995025	0.039795	0.132432
SAU	0.0583174	0.0567294	0.0146127	0.0418344	0.0768172	0.0328238	0.112189
PNG	0.0503745	0.0482676	0.0129865	0.0359316	0.0700536	0.0297967	0.0950919
JAM	0.0515472	0.0496102	0.0132493	0.0364951	0.0697095	0.0297905	0.0984902
PAK	0.0592372	0.0575006	0.014377	0.0451079	0.0748062	0.03608	0.123922
ZMB	0.0525666	0.0505022	0.013191	0.0398488	0.072656	0.0292952	0.0918815
CHN	0.0622205	0.0563412	0.0215847	0.0406342	0.0884176	0.0335497	0.144812
KAZ	0.0462635	0.0440525	0.0141666	0.0293779	0.0629166	0.0256855	0.0962928
ARM	0.0488246	0.0472356	0.0120357	0.0341526	0.0640913	0.0274962	0.0879293
LUX	0.076775	0.0742879	0.0189381	0.0568177	0.0999764	0.0451485	0.136541
ALB	0.0528836	0.0498929	0.0140476	0.0378354	0.0704456	0.0330292	0.104247
HND	0.0568991	0.0541627	0.0166851	0.0415894	0.0736899	0.032757	0.148731
NIC	0.0512823	0.0488033	0.0119535	0.0375993	0.0679373	0.0321888	0.0852523
NER	0.0544679	0.0535508	0.0177889	0.0367536	0.0748112	0.0288656	0.155156
ETH	0.0594362	0.056856	0.014352	0.043372	0.076491	0.035732	0.110865
GRL	0.0538604	0.0528776	0.0112824	0.0417527	0.0683614	0.0288953	0.0890372
OMN	0.0575448	0.0551692	0.0132354	0.0424544	0.0754439	0.0309707	0.101884
ESP	0.0778092	0.0759242	0.0194842	0.0539498	0.10257	0.0310722	0.134312
TJK	0.0510182	0.0492886	0.0147542	0.0343849	0.0692677	0.0234629	0.10872
YEM	0.0651788	0.0626931	0.013431	0.0498132	0.0817131	0.0386531	0.122331
THA	0.0496797	0.0473848	0.0144136	0.0348585	0.062542	0.025734	0.109512
UZB	0.0475456	0.0459368	0.0137615	0.0334377	0.060396	0.0218152	0.118845
DZA	0.0473265	0.0463711	0.0115259	0.0349334	0.0606163	0.0302837	0.0946635
FRA	0.0793692	0.073231	0.0224147	0.0556204	0.110309	0.0418775	0.155244
CRI	0.0561458	0.0551589	0.0110927	0.043122	0.0693668	0.0338838	0.0875513
AUT	0.0642026	0.059928	0.0201827	0.0448437	0.0875009	0.0334966	0.183601
GHA	0.0559066	0.0536872	0.0146333	0.0413383	0.0726249	0.0304351	0.137009
MEX	0.0486959	0.0480362	0.0114014	0.0349076	0.0631688	0.0233905	0.0820724
HTI	0.0586615	0.0537141	0.0165541	0.0430477	0.0795901	0.0296092	0.13424
JPN	0.0753645	0.0719784	0.0203375	0.0534431	0.105454	0.0379239	0.138539
NPL	0.0502478	0.0483186	0.0131956	0.0367335	0.0622482	0.0261796	0.108389
BGR	0.0716217	0.0674789	0.0225286	0.0483357	0.0991377	0.035158	0.162628
DNK	0.0727605	0.0706589	0.0192253	0.0509966	0.0970097	0.039398	0.14168
MMR	0.0569744	0.0562651	0.0119153	0.0413773	0.0717076	0.0324752	0.0952639
SWZ	0.0487674	0.0463633	0.0143504	0.0322669	0.0678177	0.02412	0.0900062
CYP	0.0731765	0.0711039	0.0181711	0.0513458	0.0929899	0.0344708	0.148115
ROU	0.0758617	0.0710655	0.023783	0.0499122	0.110576	0.0378935	0.166873
DOM	0.0535954	0.0515485	0.0128706	0.0394407	0.0700923	0.0249952	0.0902297
BRA	0.0501976	0.0479705	0.0132197	0.0365996	0.065378	0.0324023	0.106056
ITA	0.0723277	0.0685746	0.0228113	0.0481584	0.0941485	0.0412262	0.177149
SYR	0.0650845	0.0643684	0.0166343	0.0463088	0.0860389	0.0254826	0.124292
CHL	0.0495764	0.0465694	0.0149648	0.0323486	0.0708049	0.0277443	0.107894
BEL	0.0795962	0.0747861	0.0213011	0.0553972	0.105352	0.0439	0.14283
EST	0.066084	0.064448	0.019176	0.0440329	0.0924712	0.030545	0.120428
LBN	0.0716935	0.0712131	0.0149999	0.0536589	0.0899763	0.0355279	0.109428
GIN	0.0553739	0.0535663	0.0125164	0.0403721	0.0709075	0.0347095	0.0969535
BRN	0.0485039	0.0476387	0.0111837	0.0348015	0.0628263	0.0273065	0.0821499
MNG	0.0524134	0.051173	0.0147527	0.0355549	0.0721693	0.0291811	0.109012
PRY	0.0520693	0.0495547	0.0116988	0.0393272	0.0681765	0.0275718	0.0900308
USA	0.0474023	0.0459785	0.0123535	0.034043	0.0596824	0.028827	0.102433
RWA	0.0516411	0.0484661	0.0145695	0.037086	0.0681232	0.0272327	0.110457
PRK	0.0644953	0.060653	0.0158175	0.0470322	0.085652	0.0317776	0.111203
NGA	0.0496469	0.0492364	0.0122732	0.0340697	0.0636539	0.0258279	0.0942999
BWA	0.0430044	0.0414727	0.0123121	0.0287493	0.0556249	0.0225284	0.102186
NOR	0.0713987	0.0702694	0.0173113	0.0541561	0.0903759	0.0354179	0.161787
BIH	0.0606698	0.0565932	0.0149713	0.0435138	0.0825964	0.0355237	0.10686
BOL	0.0666557	0.0652511	0.0157845	0.0469774	0.0887653	0.0325362	0.104511
AZE	0.0522775	0.0495655	0.0120125	0.0387554	0.0711978	0.0269031	0.0801621
BLR	0.0721452	0.0722739	0.0144234	0.0529303	0.0899103	0.0417643	0.113031
KOR	0.0600829	0.0600493	0.0133057	0.0452901	0.0737707	0.0273934	0.119861
RUS	0.0301604	0.0286148	0.00689414	0.0231223	0.0391719	0.0175204	0.0547555
PER	0.0477255	0.0462954	0.0126769	0.0327502	0.0635071	0.0235607	0.0963098
VNM	0.0514428	0.0506159	0.0124091	0.0360516	0.0666104	0.0297907	0.0969871
PSE	0.0707798	0.0710983	0.0166412	0.0487374	0.0931835	0.0422004	0.112975
TUN	0.0541847	0.0515351	0.0144915	0.0380825	0.0706304	0.0291579	0.104635
NLD	0.0812622	0.0767805	0.0233516	0.0571734	0.109908	0.0408682	0.186892
GTM	0.0544229	0.0528261	0.0122441	0.0399079	0.0711826	0.0274662	0.0916535
URY	0.0468045	0.0437235	0.012205	0.0335392	0.0641222	0.0271991	0.0872932
HRV	0.070085	0.0652483	0.0200971	0.048407	0.0995558	0.0356474	0.136605
IDN	0.0530152	0.0502497	0.0137097	0.0361886	0.0704342	0.0281899	0.0999291
LAO	0.0598739	0.0559798	0.0176191	0.0413525	0.08254	0.0318206	0.129867
GUY	0.0501468	0.047853	0.0141067	0.035298	0.0658177	0.0278865	0.108363
SLB	0.0523384	0.0503785	0.0132713	0.0366333	0.0728564	0.0305589	0.0906644
ISL	0.0736877	0.0720679	0.0159439	0.0551868	0.0949732	0.041443	0.115731
MOZ	0.0601886	0.056488	0.0181557	0.0418376	0.0825289	0.0334663	0.138338
MLI	0.0543539	0.0517728	0.0156936	0.0375443	0.0747489	0.0290608	0.10766
PHL	0.0476083	0.0458866	0.011599	0.0350597	0.0625181	0.0287405	0.0923671
CAN	0.0613907	0.059407	0.0147722	0.0451189	0.0818951	0.0327205	0.104159
CMR	0.0548086	0.0523392	0.0141061	0.0401046	0.0735967	0.0328981	0.099875
FJI	0.0551816	0.052999	0.0126489	0.0409309	0.0723676	0.0331424	0.0958759
CIV	0.0485156	0.0470407	0.0117699	0.0353682	0.0615327	0.0298525	0.0899399
TUR	0.0653223	0.0630518	0.0156483	0.0513907	0.0833185	0.0396485	0.148063
LBR	0.0549986	0.0543451	0.0109427	0.0401084	0.0683971	0.0320477	0.0798579
BEN	0.0505287	0.0480437	0.0148015	0.0353858	0.0691427	0.029606	0.130143

## Sheet: Stats_B_PYR_kerosene
	mean	median	std	p10	p90	min	max
CHE	0.169867	0.169218	0.0258993	0.139127	0.202877	0.107775	0.261585
SLV	0.139387	0.136806	0.0252794	0.108215	0.169659	0.0865745	0.232575
ARG	0.134924	0.132997	0.0240008	0.10506	0.171011	0.0897002	0.196306
PAN	0.127022	0.12413	0.021139	0.101914	0.15413	0.0863051	0.211811
UKR	0.165925	0.162458	0.0333873	0.130142	0.205236	0.108763	0.308834
GEO	0.114799	0.111003	0.0192083	0.0946851	0.14404	0.0842362	0.188836
CUB	0.161126	0.155468	0.0306339	0.126069	0.202507	0.105684	0.27646
ECU	0.141281	0.135575	0.0277582	0.107211	0.179147	0.0939087	0.235765
DEU	0.150911	0.148912	0.021507	0.12563	0.173278	0.10651	0.212087
BFA	0.115276	0.112019	0.0235125	0.0876424	0.149683	0.0700759	0.183581
MDG	0.102315	0.101959	0.0192693	0.0810976	0.125787	0.0647313	0.163452
KGZ	0.126516	0.12527	0.0214924	0.0994931	0.148771	0.0847351	0.189468
IRQ	0.127184	0.124883	0.0204154	0.105741	0.152795	0.0896362	0.197109
SOM	0.12404	0.118918	0.0227247	0.098135	0.15844	0.0826058	0.190623
NAM	0.104905	0.105239	0.0183505	0.0823246	0.125345	0.0646161	0.161397
ARE	0.105305	0.106094	0.0122095	0.0906705	0.119722	0.0774375	0.134598
HUN	0.126417	0.124512	0.0174832	0.105315	0.149311	0.0932629	0.17409
SEN	0.0863209	0.0813025	0.0164531	0.0673959	0.108307	0.0581751	0.140852
LBY	0.0827821	0.0807465	0.0123656	0.0672071	0.101319	0.0565793	0.112971
SDN	0.135806	0.133303	0.0293572	0.102628	0.176945	0.0800911	0.229599
MYS	0.107631	0.104683	0.0232745	0.0803572	0.14201	0.064421	0.195176
SUR	0.117641	0.114641	0.0254445	0.0890573	0.151086	0.0777035	0.203196
BLZ	0.146403	0.142365	0.0247346	0.118459	0.184713	0.08873	0.219207
SVN	0.156846	0.155778	0.0258456	0.125548	0.184361	0.102001	0.251074
CZE	0.114963	0.113586	0.0183647	0.0926328	0.139555	0.0762665	0.161876
IRN	0.128273	0.125242	0.0223074	0.10413	0.156809	0.0865675	0.202554
SLE	0.127678	0.123977	0.0290145	0.0953247	0.161703	0.073228	0.269155
JOR	0.11292	0.112815	0.017851	0.0913164	0.137101	0.0751557	0.178223
LTU	0.126217	0.125192	0.0194908	0.100702	0.151946	0.0903702	0.179411
SWE	0.111935	0.110104	0.0178335	0.090249	0.134873	0.0732504	0.187057
POL	0.132418	0.128842	0.0254668	0.106645	0.16349	0.0831367	0.232072
TZA	0.111829	0.109711	0.0211473	0.0876258	0.138482	0.0715438	0.181699
VEN	0.175845	0.175468	0.0347067	0.130161	0.217627	0.102152	0.274527
KEN	0.138333	0.13727	0.0238751	0.106457	0.17024	0.0911919	0.193262
SVK	0.138911	0.135318	0.0211372	0.115015	0.170993	0.0931822	0.199061
GBR	0.160167	0.156322	0.0231236	0.130552	0.190936	0.112734	0.218968
MAR	0.090594	0.0878731	0.0156076	0.0722351	0.112608	0.068531	0.138847
AGO	0.120886	0.122046	0.0206204	0.0956425	0.149282	0.0712652	0.181086
KWT	0.0901663	0.0907771	0.012129	0.074055	0.10604	0.0650682	0.130329
UGA	0.107901	0.105807	0.0238158	0.0809399	0.136206	0.0631185	0.18323
KHM	0.120217	0.117905	0.0207263	0.0956018	0.150059	0.0822023	0.189021
COD	0.13265	0.12705	0.0230075	0.107947	0.165087	0.0727373	0.210795
QAT	0.0902548	0.0885161	0.0131966	0.0740377	0.106155	0.0668374	0.129941
BGD	0.126142	0.123184	0.0230704	0.101602	0.14974	0.0765963	0.203673
GRC	0.147721	0.143505	0.027993	0.117247	0.181906	0.0920596	0.25407
IND	0.100076	0.0963403	0.0178557	0.0800822	0.127375	0.062921	0.152754
MDA	0.133416	0.129881	0.0266545	0.104355	0.172541	0.0848888	0.209863
GAB	0.137923	0.136264	0.0246581	0.110076	0.166651	0.0876223	0.2407
MWI	0.116899	0.114752	0.0245246	0.0877691	0.142359	0.061373	0.232361
EGY	0.105032	0.101169	0.0230564	0.0795246	0.136802	0.0623722	0.170769
MNE	0.146377	0.143015	0.0278086	0.117139	0.182479	0.0994164	0.272645
ZAF	0.098314	0.0985814	0.0178339	0.0774822	0.119691	0.0569339	0.145773
MKD	0.135402	0.134371	0.0218622	0.106524	0.165973	0.0896697	0.195457
BHS	0.122586	0.122445	0.0191374	0.0985074	0.147405	0.0835159	0.173733
ZWE	0.119659	0.118789	0.0219232	0.0920688	0.149825	0.0776693	0.173834
IRL	0.149977	0.145207	0.0233878	0.122293	0.179192	0.109618	0.245754
LKA	0.144232	0.143566	0.0234291	0.110168	0.176284	0.0993347	0.211137
SRB	0.134621	0.130673	0.0236278	0.108415	0.161034	0.100757	0.242448
COG	0.137675	0.1371	0.0226911	0.107302	0.16565	0.085563	0.193171
NZL	0.136366	0.13494	0.0243685	0.105736	0.167942	0.0778206	0.205528
LVA	0.132306	0.130271	0.0211094	0.107771	0.156545	0.0838336	0.201467
AUS	0.137117	0.134098	0.0223678	0.110338	0.167064	0.0948235	0.210627
FLK	0.17331	0.167955	0.0404726	0.129067	0.218103	0.109206	0.325572
ISR	0.116785	0.114769	0.0188387	0.0936744	0.141366	0.0838111	0.177165
COL	0.101266	0.100256	0.0171485	0.081215	0.122746	0.0691133	0.144499
FIN	0.176337	0.170561	0.0343639	0.138162	0.215053	0.12376	0.316827
GMB	0.097668	0.0955267	0.0174859	0.0776893	0.121894	0.0643695	0.167291
PRT	0.137422	0.134709	0.0203152	0.113392	0.164437	0.0948589	0.1944
SAU	0.120982	0.11919	0.0209472	0.0967139	0.147637	0.0805633	0.181046
PNG	0.128784	0.122943	0.0205699	0.107356	0.154287	0.0918731	0.201835
JAM	0.127397	0.127433	0.0202572	0.102764	0.154819	0.0852653	0.17798
PAK	0.142716	0.138587	0.0261618	0.112549	0.182972	0.102127	0.230407
ZMB	0.125518	0.124021	0.0254367	0.0955585	0.160875	0.0748414	0.199041
CHN	0.0814798	0.0781954	0.0140633	0.0675659	0.100357	0.0502748	0.130931
KAZ	0.10879	0.107421	0.0186458	0.0869949	0.133273	0.076729	0.179525
ARM	0.126607	0.125876	0.0227217	0.0984484	0.159711	0.0833274	0.210555
LUX	0.153232	0.153156	0.02638	0.119598	0.187219	0.105255	0.234272
ALB	0.134257	0.131112	0.0245215	0.103646	0.17142	0.0887599	0.196552
HND	0.134641	0.131188	0.0247533	0.106994	0.172105	0.0786233	0.216191
NIC	0.104511	0.104231	0.0189188	0.0828739	0.127031	0.0663498	0.167844
NER	0.110401	0.107012	0.0188169	0.0875294	0.136017	0.0745529	0.168208
ETH	0.136504	0.135685	0.0272305	0.10527	0.168333	0.0724489	0.206481
GRL	0.159274	0.156618	0.0315957	0.120181	0.197033	0.10133	0.250538
OMN	0.122249	0.119988	0.0189265	0.0977745	0.145334	0.0813174	0.187901
ESP	0.154844	0.152699	0.0227756	0.129751	0.182845	0.115784	0.243098
TJK	0.125831	0.123257	0.0239878	0.095491	0.156868	0.0771442	0.192703
YEM	0.162322	0.158347	0.0312357	0.128628	0.200836	0.108341	0.284324
THA	0.0978359	0.0947806	0.0199766	0.0757578	0.120637	0.0654101	0.198484
UZB	0.106568	0.105711	0.0173727	0.0841743	0.1274	0.0671555	0.167996
DZA	0.0945527	0.0944029	0.0153117	0.0756808	0.113722	0.0637137	0.130758
FRA	0.160231	0.156478	0.0266279	0.129755	0.2026	0.117167	0.234364
CRI	0.140931	0.137105	0.027036	0.110123	0.177393	0.0936114	0.226105
AUT	0.127468	0.126669	0.0180319	0.108592	0.150162	0.0896901	0.196604
GHA	0.132078	0.130117	0.0249385	0.102615	0.165376	0.0796308	0.191671
MEX	0.0959428	0.0944148	0.0198526	0.0705285	0.121341	0.0590112	0.154816
HTI	0.145044	0.141569	0.0255615	0.114157	0.179846	0.0959021	0.224108
JPN	0.19898	0.198635	0.0284857	0.167327	0.234931	0.133837	0.297239
NPL	0.123936	0.119222	0.0228304	0.0986894	0.151826	0.0842192	0.204372
BGR	0.144277	0.139031	0.0298808	0.113388	0.177545	0.0857893	0.257049
DNK	0.153546	0.151688	0.0202161	0.12988	0.184362	0.110926	0.208354
MMR	0.147629	0.146501	0.0299773	0.113312	0.188321	0.0867645	0.239037
SWZ	0.1012	0.0994956	0.015708	0.0818732	0.119946	0.0667909	0.154896
CYP	0.155657	0.152161	0.0300077	0.122685	0.194666	0.0993706	0.260955
ROU	0.155879	0.153796	0.0259888	0.127665	0.181398	0.103333	0.26109
DOM	0.123634	0.12232	0.0191365	0.101896	0.144691	0.0934044	0.204818
BRA	0.0972819	0.0961393	0.0173758	0.07555	0.118421	0.0653768	0.143115
ITA	0.133574	0.133496	0.0217853	0.104993	0.15582	0.088623	0.199158
SYR	0.150915	0.153129	0.024343	0.119592	0.180253	0.0948522	0.217755
CHL	0.0917119	0.0908486	0.0150963	0.0722016	0.113701	0.059831	0.128853
BEL	0.146605	0.148892	0.0221777	0.119286	0.176603	0.100335	0.207621
EST	0.130057	0.131471	0.0199529	0.103976	0.154784	0.0870371	0.18185
LBN	0.183065	0.179747	0.0356849	0.141714	0.238024	0.106485	0.282935
GIN	0.12479	0.12348	0.0232398	0.0954389	0.153086	0.0786623	0.187676
BRN	0.12393	0.12178	0.0249773	0.0985742	0.151459	0.0768759	0.220498
MNG	0.116892	0.116353	0.0164109	0.0955671	0.137335	0.0754198	0.172708
PRY	0.100968	0.0991464	0.0205052	0.0781727	0.122938	0.0612791	0.185238
USA	0.119569	0.120584	0.0173591	0.0990114	0.140546	0.0804374	0.182489
RWA	0.113054	0.107123	0.0226828	0.0889968	0.1444	0.0696066	0.196601
PRK	0.149455	0.143658	0.026027	0.120536	0.185087	0.0948234	0.22454
NGA	0.11431	0.111932	0.0198052	0.0910129	0.141604	0.0660464	0.16601
BWA	0.0878967	0.0864833	0.0161212	0.0697995	0.103189	0.0606712	0.180668
NOR	0.156769	0.152512	0.0305527	0.121034	0.199541	0.096999	0.247741
BIH	0.159504	0.151877	0.0317416	0.125341	0.20052	0.108804	0.271088
BOL	0.141286	0.138202	0.0282585	0.106965	0.182106	0.0848563	0.210444
AZE	0.130961	0.129649	0.0211668	0.105535	0.159383	0.0836735	0.19135
BLR	0.178485	0.179038	0.0275579	0.144486	0.214705	0.118188	0.238715
KOR	0.124515	0.123044	0.0220823	0.100573	0.152151	0.0798661	0.214782
RUS	0.118472	0.11604	0.0172566	0.0982782	0.139735	0.0789767	0.188477
PER	0.104642	0.103043	0.0211106	0.080211	0.13107	0.0628059	0.170644
VNM	0.110237	0.107984	0.0168888	0.0901569	0.130276	0.0655543	0.153719
PSE	0.167834	0.161821	0.0323959	0.128139	0.210127	0.10801	0.26948
TUN	0.113222	0.114425	0.0187536	0.0886298	0.135721	0.0719156	0.17047
NLD	0.141342	0.141018	0.0226891	0.110185	0.169018	0.0887826	0.202329
GTM	0.130189	0.124327	0.0245305	0.105121	0.16276	0.0896141	0.240384
URY	0.0887458	0.0859567	0.0131633	0.0737738	0.105608	0.0568542	0.129314
HRV	0.143695	0.142026	0.0211457	0.116143	0.170341	0.098246	0.202033
IDN	0.114996	0.113652	0.0206923	0.0908503	0.1398	0.0779372	0.195577
LAO	0.141653	0.137098	0.0253943	0.115144	0.1777	0.0993015	0.239059
GUY	0.108181	0.106875	0.0210757	0.0817944	0.13398	0.0640435	0.17894
SLB	0.132672	0.130223	0.027402	0.102417	0.165058	0.0821266	0.244058
ISL	0.191455	0.19083	0.0382558	0.147138	0.228805	0.117885	0.352405
MOZ	0.1222	0.119909	0.0243885	0.0950675	0.154139	0.0755111	0.192079
MLI	0.109196	0.107621	0.01964	0.0854351	0.131628	0.0627747	0.161667
PHL	0.108766	0.105285	0.0209527	0.0857101	0.135515	0.0709764	0.186711
CAN	0.14207	0.140969	0.0235721	0.1131	0.176105	0.0959703	0.227378
CMR	0.120585	0.116229	0.0224268	0.0944381	0.152167	0.0769527	0.197989
FJI	0.12691	0.12331	0.0220096	0.103666	0.151867	0.0735228	0.215501
CIV	0.10865	0.105284	0.0202359	0.0847847	0.135222	0.0672257	0.159515
TUR	0.158111	0.158674	0.0252166	0.124618	0.193306	0.101309	0.222994
LBR	0.123404	0.119827	0.026099	0.0964656	0.145375	0.0754413	0.264127
BEN	0.110051	0.10358	0.0257464	0.0838714	0.143306	0.0657989	0.233154

## Sheet: Stats_CLR
	mean	median	std	p10	p90	min	max
CHE	0.0698784	0.0677731	0.0162373	0.0505793	0.0884031	0.0310735	0.126928
SLV	0.0546432	0.050265	0.0160662	0.0362976	0.0750287	0.0299201	0.12902
ARG	0.0595739	0.0598326	0.0145716	0.0416424	0.0771177	0.0351347	0.102014
PAN	0.0513097	0.0491754	0.0138673	0.0336519	0.0703303	0.0273458	0.0887719
UKR	0.0603877	0.0582793	0.0146923	0.0456503	0.0840405	0.0265395	0.0966333
GEO	0.0477885	0.0446862	0.0139345	0.0323879	0.064548	0.0255102	0.0925841
CUB	0.0615982	0.0586556	0.0154767	0.0436443	0.0803365	0.0374499	0.112259
ECU	0.0625086	0.0614019	0.0155903	0.0452061	0.0837436	0.0298386	0.112899
DEU	0.0814702	0.0769695	0.0257359	0.0524022	0.111259	0.040658	0.172853
BFA	0.0509721	0.0494411	0.0138097	0.0345272	0.069502	0.0227443	0.0970073
MDG	0.0464903	0.0445701	0.0122843	0.0320208	0.059253	0.0269391	0.0906239
KGZ	0.0514991	0.0497766	0.0162439	0.0335124	0.0734927	0.0235558	0.0984816
IRQ	0.0544027	0.0522891	0.0165613	0.0384878	0.070145	0.0312732	0.162943
SOM	0.0577036	0.0540756	0.0156349	0.0417116	0.0795779	0.02568	0.111732
NAM	0.0537564	0.0510367	0.0170113	0.0374489	0.0719439	0.0300691	0.140947
ARE	0.0498959	0.047368	0.0140678	0.0352248	0.0660011	0.0254132	0.10764
HUN	0.0764622	0.0710009	0.0225895	0.0523198	0.110781	0.0318096	0.145108
SEN	0.0476918	0.0443242	0.0146904	0.03309	0.0658834	0.0252999	0.111554
LBY	0.0465913	0.0466377	0.0130611	0.0293214	0.0628229	0.0201351	0.0774761
SDN	0.0588335	0.0578067	0.0143829	0.0427016	0.0769941	0.0257199	0.0960118
MYS	0.0531359	0.0494193	0.0150923	0.0357903	0.0736132	0.0290809	0.0986264
SUR	0.0540891	0.0505127	0.0164438	0.0367729	0.0739614	0.027421	0.109874
BLZ	0.058069	0.0547862	0.0191547	0.0391638	0.0757859	0.0295246	0.142419
SVN	0.0793442	0.0745255	0.0270547	0.0519597	0.110446	0.0373792	0.200303
CZE	0.067541	0.0634977	0.0243287	0.0431391	0.0947576	0.0295757	0.174063
IRN	0.0551377	0.0509562	0.0179711	0.0368644	0.0751564	0.0262204	0.127719
SLE	0.0558832	0.0545661	0.0145701	0.0380077	0.0780064	0.0285733	0.0972313
JOR	0.0523259	0.0475737	0.0157443	0.036216	0.0732961	0.0269324	0.109473
LTU	0.0763746	0.0710215	0.0286805	0.0461068	0.116919	0.0301705	0.178885
SWE	0.0689347	0.0623506	0.0275304	0.0395448	0.103358	0.0303434	0.200042
POL	0.0688754	0.0648762	0.018096	0.0511575	0.0926269	0.0370163	0.141398
TZA	0.0499655	0.0474586	0.0154661	0.0334696	0.0709666	0.025456	0.110145
VEN	0.0720386	0.0671616	0.0180521	0.0544397	0.0966841	0.0403894	0.13362
KEN	0.0535701	0.0511511	0.0154906	0.0368557	0.0709054	0.026902	0.11689
SVK	0.0758201	0.0689203	0.0286249	0.0465152	0.112855	0.036468	0.205123
GBR	0.0608104	0.0586007	0.0154442	0.0442141	0.081276	0.0381908	0.111728
MAR	0.0513425	0.049803	0.0158862	0.0338183	0.0703141	0.0261344	0.111942
AGO	0.0531737	0.0511733	0.0151684	0.0363944	0.0718837	0.0286187	0.116754
KWT	0.0438023	0.039877	0.0139735	0.0308656	0.0630254	0.0229671	0.110017
UGA	0.05306	0.0512439	0.0168255	0.0346009	0.0677846	0.025671	0.116972
KHM	0.0502603	0.0485049	0.0151759	0.0330227	0.0710771	0.0236023	0.100873
COD	0.0515492	0.0492574	0.0150274	0.035829	0.0682556	0.0231588	0.100639
QAT	0.0464637	0.0439361	0.0154647	0.0307489	0.0674071	0.024971	0.108983
BGD	0.0539286	0.0513043	0.016082	0.0372286	0.0763863	0.0267634	0.106508
GRC	0.0794876	0.0738406	0.0256699	0.0504511	0.116375	0.0451624	0.174827
IND	0.0459973	0.042125	0.0147582	0.0304943	0.0624658	0.0246466	0.126918
MDA	0.0529479	0.049228	0.0176324	0.036279	0.0687282	0.0269115	0.133537
GAB	0.058102	0.0546226	0.0162581	0.0416397	0.0786158	0.0314646	0.145691
MWI	0.0534481	0.0501605	0.0131813	0.0378928	0.0689019	0.0315973	0.0977034
EGY	0.05584	0.054471	0.0138947	0.0397925	0.0786013	0.0263999	0.0911918
MNE	0.0581991	0.0566237	0.0158402	0.0415354	0.074093	0.0342089	0.125049
ZAF	0.0503945	0.0468381	0.0158402	0.0335224	0.0706277	0.0252616	0.107881
MKD	0.0515865	0.0505487	0.0121412	0.0374211	0.0662134	0.0257821	0.0920752
BHS	0.0536438	0.0532907	0.0138027	0.0371531	0.0693758	0.0297689	0.10883
ZWE	0.0535455	0.0526825	0.0147772	0.0378303	0.0730317	0.0242592	0.114771
IRL	0.0809097	0.0739257	0.0261967	0.0508376	0.122439	0.0362537	0.171599
LKA	0.0568545	0.0539491	0.0142043	0.0410877	0.0774827	0.0301394	0.100076
SRB	0.0565453	0.0532344	0.0147261	0.0417234	0.0744667	0.0356391	0.110781
COG	0.0566252	0.053866	0.0157669	0.0399255	0.0761269	0.0305293	0.124591
NZL	0.0594584	0.0572985	0.0180784	0.0391932	0.082344	0.031699	0.119244
LVA	0.0739743	0.067991	0.0251908	0.0502854	0.103957	0.0357409	0.190362
AUS	0.0596456	0.0562159	0.0153473	0.0401844	0.0775363	0.0337678	0.109859
FLK	0.0622632	0.0563493	0.0197721	0.0412976	0.0892149	0.0344664	0.131387
ISR	0.0515918	0.0516266	0.014125	0.0359318	0.0701813	0.0248158	0.111091
COL	0.0522637	0.0498378	0.0163424	0.0340798	0.0723537	0.0256791	0.11621
FIN	0.0820035	0.0756021	0.0268268	0.054935	0.114367	0.0493442	0.175997
GMB	0.0480995	0.0467965	0.0156037	0.0304196	0.0682462	0.0253396	0.100885
PRT	0.0784134	0.0743596	0.0255142	0.052867	0.108672	0.0419521	0.178681
SAU	0.0571245	0.0555785	0.0147205	0.0401883	0.0799631	0.0291418	0.0955519
PNG	0.0534096	0.0497963	0.0158511	0.0366622	0.0780506	0.0293381	0.107016
JAM	0.0533263	0.0504784	0.016845	0.0347316	0.0700913	0.0265036	0.142045
PAK	0.0582929	0.0564163	0.017244	0.0395549	0.0826933	0.0268861	0.122102
ZMB	0.0532958	0.0512226	0.0163201	0.0367703	0.0748953	0.0273725	0.124198
CHN	0.0638778	0.0581991	0.0245561	0.0369197	0.0958882	0.0252996	0.154892
KAZ	0.0464097	0.0436935	0.0134588	0.0312023	0.0648711	0.0254724	0.0867416
ARM	0.0513729	0.0517603	0.0151963	0.0347362	0.0765476	0.0229395	0.0925799
LUX	0.0830981	0.0726458	0.0304635	0.0554264	0.126245	0.0460276	0.181167
ALB	0.0525459	0.0514835	0.0132556	0.0354094	0.0728065	0.0304503	0.0846031
HND	0.0561847	0.0524323	0.0184131	0.0394415	0.0779332	0.027807	0.177494
NIC	0.0519579	0.04793	0.0153717	0.0368416	0.0732887	0.0277614	0.110261
NER	0.0533912	0.0524053	0.0129421	0.0378715	0.0719843	0.0299655	0.0965466
ETH	0.0615599	0.0577597	0.0190967	0.0414667	0.0820588	0.0305768	0.133967
GRL	0.0567337	0.0552176	0.0147739	0.0401522	0.0738035	0.0309153	0.109724
OMN	0.0565115	0.054544	0.0176611	0.0367452	0.07787	0.029278	0.133912
ESP	0.0806156	0.0752313	0.0250647	0.0531224	0.116752	0.0321106	0.153189
TJK	0.0511082	0.0485406	0.0152874	0.0356591	0.0729839	0.0279165	0.103802
YEM	0.06297	0.0614124	0.0135542	0.0494211	0.0808285	0.0312417	0.107572
THA	0.0516268	0.0485327	0.0185706	0.0333245	0.0689171	0.0245384	0.177191
UZB	0.0482473	0.0471476	0.0140111	0.0305865	0.0671028	0.0219422	0.102181
DZA	0.0493288	0.0447204	0.0158872	0.0328506	0.0721852	0.0211337	0.0932241
FRA	0.0781006	0.0752996	0.0233419	0.0528211	0.102281	0.0445776	0.15071
CRI	0.0536594	0.0501281	0.0148221	0.0381667	0.0711086	0.0287914	0.111473
AUT	0.0727456	0.068704	0.0246685	0.0447601	0.106008	0.0348522	0.155689
GHA	0.0561939	0.0531883	0.0191628	0.037961	0.0745967	0.0267189	0.127493
MEX	0.0479062	0.0447281	0.01338	0.0342941	0.0627098	0.0190131	0.0963816
HTI	0.0558584	0.0531728	0.0150105	0.0390262	0.0724737	0.0257981	0.103612
JPN	0.0783262	0.0753182	0.0220283	0.0542864	0.104952	0.0343607	0.161564
NPL	0.0535178	0.047338	0.0192308	0.0348323	0.0852139	0.0253159	0.107774
BGR	0.0747448	0.0699899	0.0262139	0.046786	0.100908	0.0348783	0.220755
DNK	0.076699	0.0695376	0.0274882	0.0490038	0.120205	0.0307508	0.15272
MMR	0.0554283	0.0532958	0.0138599	0.0400138	0.0711788	0.0264973	0.105056
SWZ	0.0495794	0.0478005	0.0150116	0.0324412	0.0688575	0.0244498	0.0921524
CYP	0.0749592	0.0703094	0.0219958	0.0515482	0.1111	0.038336	0.147048
ROU	0.0848462	0.0811959	0.0243388	0.0574979	0.115374	0.0339858	0.148083
DOM	0.0505463	0.0480208	0.0146235	0.0352922	0.0662381	0.0280514	0.126972
BRA	0.0496491	0.0474929	0.0141592	0.0354531	0.0684878	0.0240305	0.107496
ITA	0.0795436	0.0745131	0.0279684	0.0507134	0.112106	0.0376184	0.180614
SYR	0.0601434	0.0604388	0.0178375	0.0364774	0.0783224	0.0303355	0.132334
CHL	0.0486982	0.0442153	0.0173113	0.0320823	0.0706523	0.022864	0.105356
BEL	0.0802579	0.076665	0.0219372	0.0566985	0.106488	0.0434657	0.161551
EST	0.0719031	0.0692163	0.0224046	0.0430092	0.105139	0.0343562	0.141129
LBN	0.0667401	0.0654336	0.0176782	0.0476749	0.0870206	0.0410713	0.153063
GIN	0.0556195	0.0514059	0.0160929	0.0370353	0.0809657	0.0317643	0.102547
BRN	0.0522295	0.0492536	0.0155076	0.0365694	0.0738504	0.0238224	0.116784
MNG	0.0490613	0.0452495	0.0148143	0.031808	0.066715	0.0248819	0.0949178
PRY	0.0491034	0.0454345	0.015169	0.0323812	0.0651901	0.0280565	0.116232
USA	0.0445043	0.0415593	0.0129734	0.0305065	0.0609201	0.0215659	0.104031
RWA	0.0525078	0.0492943	0.0150095	0.0382142	0.0732966	0.0271394	0.108464
PRK	0.0629459	0.062142	0.0157216	0.0445231	0.08103	0.0260445	0.126822
NGA	0.0541658	0.0515965	0.016012	0.0390977	0.0689867	0.029184	0.131775
BWA	0.0461381	0.0440135	0.0139757	0.0332952	0.059902	0.0247225	0.118883
NOR	0.0664006	0.0632391	0.0179321	0.0464047	0.0831821	0.0400048	0.146091
BIH	0.0589122	0.0551251	0.0167342	0.0390752	0.0794285	0.0329417	0.115669
BOL	0.0602673	0.0600694	0.0142226	0.0442096	0.0756942	0.0331956	0.107321
AZE	0.0535844	0.0478196	0.0176078	0.0349745	0.0796615	0.0295759	0.110785
BLR	0.0686908	0.06542	0.0196003	0.0489055	0.0993331	0.0370984	0.125691
KOR	0.0574233	0.0558075	0.0140315	0.0405816	0.076287	0.0351413	0.0993089
RUS	0.0273341	0.0268715	0.00636298	0.0198937	0.0371806	0.0159421	0.0467612
PER	0.0506959	0.0462628	0.0156539	0.0351697	0.0764891	0.0256552	0.0907068
VNM	0.0499109	0.0493985	0.0127989	0.0345265	0.0676768	0.0250526	0.0903561
PSE	0.0702652	0.0677443	0.0204107	0.0488015	0.0945132	0.0357321	0.145197
TUN	0.0546295	0.0526504	0.0160279	0.0362754	0.0764054	0.026391	0.109601
NLD	0.0811469	0.0784935	0.0258745	0.053304	0.119205	0.0339287	0.170829
GTM	0.05247	0.0507256	0.0148155	0.0357726	0.072318	0.0255393	0.0970214
URY	0.0489005	0.0452986	0.0159852	0.0328523	0.0693327	0.0254441	0.117587
HRV	0.0766721	0.0702945	0.0296082	0.0478348	0.1116	0.0333456	0.212357
IDN	0.0508558	0.0465825	0.0159786	0.0344876	0.0725551	0.0263725	0.116638
LAO	0.058436	0.0548655	0.0179585	0.0368681	0.082265	0.0268473	0.125444
GUY	0.0500614	0.0486456	0.0133126	0.032143	0.0666263	0.0258757	0.0949291
SLB	0.0524447	0.0502684	0.013323	0.037289	0.0690372	0.0314657	0.109866
ISL	0.0686145	0.0644607	0.0213995	0.0472734	0.0905779	0.0304694	0.182182
MOZ	0.0576767	0.0535491	0.0170968	0.0388384	0.0798335	0.0291112	0.122987
MLI	0.0500993	0.0486551	0.0133203	0.0353742	0.06745	0.0246372	0.0969635
PHL	0.0497153	0.04633	0.0152491	0.0351181	0.0706475	0.0231824	0.115804
CAN	0.0575	0.0570982	0.0148521	0.0389095	0.0799998	0.0311151	0.0908934
CMR	0.0531198	0.0504487	0.0130818	0.0385038	0.0713315	0.0321447	0.0897749
FJI	0.0531805	0.0505138	0.0154844	0.0369929	0.0711318	0.0321636	0.133187
CIV	0.0503951	0.0505942	0.0136692	0.0341269	0.0655117	0.0233492	0.106463
TUR	0.0621756	0.0595634	0.0182564	0.045272	0.0838224	0.028748	0.141186
LBR	0.0573965	0.0549874	0.0170181	0.0376051	0.0760609	0.0286068	0.118783
BEN	0.0490922	0.0459751	0.0168352	0.0321055	0.0663049	0.0231681	0.131627

## Sheet: Stats_CuCl
	mean	median	std	p10	p90	min	max
ARG	0.0931469	0.0849873	0.0285035	0.0619311	0.133957	0.0458521	0.175206
CHE	0.0615713	0.0598141	0.0162471	0.0419656	0.0837492	0.0325919	0.112131
USA	0.0560349	0.055927	0.0151149	0.0361846	0.07643	0.0283317	0.0933479
UKR	0.0721809	0.0712963	0.0172995	0.0523928	0.0972536	0.0393113	0.116719
IND	0.0713615	0.0675712	0.0241168	0.0468512	0.0954596	0.0328853	0.16329
ESP	0.0929991	0.089836	0.0289599	0.058863	0.12811	0.041243	0.190973
ARE	0.0790781	0.073663	0.025439	0.0496771	0.108967	0.0375567	0.170126
KOR	0.0880986	0.0824746	0.029376	0.0560075	0.128323	0.032725	0.180095
HUN	0.0650763	0.0645762	0.0166449	0.0448592	0.0884109	0.0384826	0.112171
RUS	0.0657781	0.0607419	0.0197145	0.0457883	0.0941869	0.0332601	0.118149
FRA	0.0594403	0.0569701	0.0149253	0.0443216	0.0773242	0.0306159	0.118294
ZAF	0.108995	0.103681	0.0382821	0.0661119	0.147758	0.0408632	0.232313
NLD	0.106168	0.102388	0.0316669	0.0713867	0.148061	0.0497315	0.221049
SVN	0.0751219	0.0724995	0.0210118	0.0557935	0.0992108	0.0330605	0.148014
CZE	0.0729936	0.069862	0.0217764	0.0506358	0.10106	0.0359883	0.140315
IRN	0.116156	0.110074	0.036482	0.0729526	0.166147	0.0441231	0.211516
MEX	0.0955864	0.0932766	0.0288812	0.062161	0.131938	0.0441126	0.192981
JPN	0.115471	0.113353	0.035357	0.0750208	0.163284	0.0568941	0.220528
BGR	0.0648255	0.0614236	0.018225	0.0447478	0.0862445	0.0258468	0.136811
SWE	0.047503	0.0455942	0.0124501	0.0334092	0.0651472	0.0259256	0.0798279
FIN	0.0830808	0.0793816	0.0260238	0.0561178	0.116175	0.0404347	0.190991
CAN	0.102579	0.0948948	0.035378	0.0643209	0.15166	0.0485585	0.225448
ROU	0.0707988	0.0684449	0.0229171	0.0464185	0.0949441	0.0370967	0.169533
SVK	0.144005	0.132367	0.0505453	0.0845567	0.21895	0.0433643	0.289662
GBR	0.0943139	0.0885225	0.026471	0.0643809	0.12594	0.0543927	0.189744
PAK	0.0818124	0.0782422	0.024027	0.0552013	0.108489	0.041918	0.167877
BRA	0.0881835	0.0865284	0.0261125	0.0589514	0.12021	0.0388758	0.183268
CHN	0.0831153	0.0777258	0.0283598	0.0552479	0.119903	0.030765	0.190464
ARM	0.0707054	0.0690089	0.0204452	0.0473507	0.0962005	0.0296	0.138075
BEL	0.0959608	0.0930842	0.0311028	0.0633851	0.130089	0.047152	0.257923

## Sheet: Stats_HB
	mean	median	std	p10	p90	min	max
CHE	0.174469	0.159245	0.0611119	0.108124	0.254627	0.0745983	0.411902
SLV	0.153574	0.147915	0.0481081	0.0934323	0.222105	0.0743634	0.296037
ARG	0.153991	0.135642	0.0576634	0.0986854	0.231405	0.0650701	0.343718
PAN	0.145527	0.132232	0.0574876	0.0905077	0.223259	0.0532055	0.307135
UKR	0.175387	0.164834	0.0598984	0.1193	0.255635	0.0657808	0.386829
GEO	0.139887	0.127409	0.0559038	0.0903087	0.206236	0.0617872	0.461241
CUB	0.186038	0.179368	0.0708002	0.108629	0.266423	0.0645453	0.47656
ECU	0.174952	0.162676	0.0592046	0.11081	0.279052	0.0622638	0.330701
DEU	0.122752	0.110882	0.0521514	0.0727488	0.181132	0.0581139	0.318587
BFA	0.1411	0.131094	0.052698	0.0835499	0.21575	0.0550123	0.283117
MDG	0.128777	0.114365	0.0432427	0.0825147	0.190946	0.0639457	0.270786
KGZ	0.142418	0.141158	0.0491935	0.0810353	0.204571	0.0582866	0.307043
IRQ	0.127204	0.124253	0.042063	0.0784515	0.183275	0.0448863	0.261129
SOM	0.135629	0.125648	0.0487007	0.0855487	0.205482	0.0553163	0.294763
NAM	0.124077	0.118817	0.0402941	0.0721098	0.190272	0.0556306	0.229391
ARE	0.1	0.0905475	0.0389551	0.0590818	0.150554	0.0388972	0.288646
HUN	0.133594	0.125711	0.0498983	0.0837203	0.202629	0.0481009	0.286961
SEN	0.115736	0.105029	0.0432173	0.0737653	0.170558	0.0443188	0.273826
LBY	0.0914702	0.082039	0.0390449	0.0522236	0.131552	0.0373028	0.269468
SDN	0.135984	0.122249	0.0523683	0.0808772	0.191913	0.0523561	0.400919
MYS	0.165999	0.149734	0.0616756	0.0984324	0.254347	0.06306	0.390197
SUR	0.1728	0.164143	0.0609399	0.095623	0.26142	0.0728859	0.369556
BLZ	0.167897	0.150755	0.0617641	0.105853	0.2526	0.0702001	0.410472
SVN	0.172199	0.151162	0.0740355	0.110357	0.259599	0.0592326	0.523115
CZE	0.141756	0.134566	0.0525312	0.090313	0.208277	0.062255	0.415892
IRN	0.133699	0.120032	0.0577056	0.0791082	0.224843	0.0556647	0.324815
SLE	0.167579	0.152326	0.0664199	0.0998734	0.257221	0.0629454	0.457727
JOR	0.104414	0.0990781	0.0401707	0.0614775	0.144086	0.0447678	0.283745
LTU	0.123922	0.120776	0.0422518	0.0696117	0.181965	0.0414417	0.255342
SWE	0.117128	0.105723	0.0446976	0.0697979	0.18121	0.0445062	0.286205
POL	0.132505	0.113819	0.0585608	0.0807925	0.187936	0.050067	0.353889
TZA	0.14296	0.138639	0.0446218	0.0885727	0.193878	0.0631224	0.308063
VEN	0.231093	0.210004	0.0887593	0.138647	0.352791	0.0812518	0.49202
KEN	0.142515	0.136746	0.047263	0.0870659	0.20394	0.0593043	0.298477
SVK	0.138366	0.133358	0.0519828	0.0810301	0.200085	0.0576976	0.322781
GBR	0.120682	0.110037	0.0403465	0.0798058	0.178844	0.0537912	0.262052
MAR	0.0920775	0.0832201	0.0358017	0.0583409	0.138744	0.0353389	0.29453
AGO	0.16597	0.155323	0.0591643	0.0948499	0.24584	0.0567944	0.327004
KWT	0.0763986	0.0687039	0.0285991	0.0442186	0.119194	0.0287288	0.175749
UGA	0.150691	0.144595	0.0540046	0.0896715	0.218679	0.0613464	0.363939
KHM	0.149884	0.138668	0.0657021	0.0803295	0.207494	0.05968	0.41501
COD	0.16639	0.15506	0.0637177	0.0987403	0.24617	0.0587487	0.401338
QAT	0.0759589	0.0754196	0.0242265	0.0461988	0.108177	0.0358534	0.146798
BGD	0.156594	0.148476	0.0571784	0.0903323	0.227256	0.0555209	0.336584
GRC	0.16269	0.154074	0.0612002	0.0994684	0.236669	0.061638	0.354641
IND	0.127999	0.123297	0.0443048	0.0777248	0.180068	0.0643616	0.294663
MDA	0.142233	0.133005	0.0559382	0.0907157	0.209552	0.0490908	0.374728
GAB	0.170757	0.152704	0.0595826	0.103945	0.256451	0.0871422	0.335165
MWI	0.14115	0.137786	0.0458591	0.0851633	0.210562	0.0458257	0.257965
EGY	0.117969	0.111158	0.0384737	0.0758754	0.175667	0.0540599	0.222969
MNE	0.178339	0.167551	0.0641132	0.100997	0.272163	0.0659833	0.397162
ZAF	0.119612	0.105067	0.0523283	0.0650607	0.179758	0.0367351	0.352649
MKD	0.183387	0.170011	0.0714238	0.105538	0.284723	0.0838245	0.459123
BHS	0.126996	0.117206	0.0492644	0.0774578	0.178699	0.0616915	0.311625
ZWE	0.142037	0.1315	0.0556107	0.083749	0.201024	0.054427	0.337304
IRL	0.124403	0.117045	0.0426878	0.0761491	0.186929	0.054819	0.272561
LKA	0.153422	0.143428	0.0531143	0.096553	0.226643	0.0482821	0.293266
SRB	0.162074	0.146782	0.0671183	0.0858195	0.233224	0.0572059	0.429306
COG	0.1926	0.175638	0.0730862	0.12054	0.28003	0.0648884	0.520692
NZL	0.127166	0.115983	0.046779	0.0775792	0.193217	0.0621136	0.258657
LVA	0.121055	0.111431	0.0377925	0.0799475	0.174414	0.0407077	0.250374
AUS	0.124788	0.113616	0.046882	0.0758579	0.18647	0.0462246	0.301912
FLK	0.260253	0.247802	0.0972097	0.152285	0.40113	0.0964336	0.570746
ISR	0.111134	0.105237	0.0368134	0.0694767	0.173216	0.0457559	0.215119
COL	0.129547	0.124711	0.0458469	0.0772464	0.187355	0.051022	0.28006
FIN	0.238807	0.21193	0.0883205	0.144646	0.386418	0.0860826	0.46571
GMB	0.12374	0.112838	0.047293	0.0820176	0.17164	0.0602388	0.42708
PRT	0.135881	0.126763	0.0579563	0.086109	0.184437	0.0498199	0.499701
SAU	0.101494	0.101063	0.0331349	0.0641903	0.139389	0.0398776	0.240415
PNG	0.15197	0.145436	0.0504311	0.0903299	0.21565	0.0690629	0.315409
JAM	0.147193	0.135364	0.0530967	0.0904511	0.221061	0.0501581	0.304121
PAK	0.160977	0.147597	0.0536803	0.103187	0.227949	0.0811573	0.350214
ZMB	0.155735	0.156295	0.0517481	0.0969933	0.219485	0.0610672	0.38513
CHN	0.110014	0.107634	0.0372872	0.0642086	0.159343	0.0591692	0.25155
KAZ	0.116509	0.110756	0.039991	0.0710676	0.178106	0.0455894	0.249079
ARM	0.14924	0.136012	0.0592959	0.0899	0.213926	0.0662254	0.370304
LUX	0.141639	0.131134	0.0539274	0.0828056	0.211868	0.055061	0.32503
ALB	0.173141	0.150236	0.0838018	0.0981044	0.261666	0.0617623	0.591718
HND	0.162338	0.150546	0.0577345	0.100267	0.244752	0.0617902	0.385295
NIC	0.145798	0.1343	0.0521014	0.0946668	0.211498	0.0598738	0.299699
NER	0.116886	0.10919	0.0376841	0.076726	0.170076	0.0514273	0.217254
ETH	0.166844	0.15606	0.0582336	0.0998215	0.262958	0.061925	0.345773
GRL	0.261925	0.240949	0.0918172	0.169824	0.412623	0.102214	0.582287
OMN	0.106306	0.0992123	0.0371159	0.062684	0.153869	0.0481219	0.258703
ESP	0.143978	0.133686	0.0510652	0.0917113	0.206557	0.0677639	0.40484
TJK	0.150783	0.136408	0.0603493	0.0866004	0.22634	0.0621444	0.345196
YEM	0.183309	0.167202	0.0620693	0.119768	0.268919	0.0739098	0.439324
THA	0.13842	0.135044	0.0454876	0.0861526	0.200367	0.0562859	0.282817
UZB	0.117812	0.119461	0.0431154	0.0661504	0.165082	0.0483901	0.256166
DZA	0.105823	0.0972346	0.0387916	0.0686135	0.156095	0.0426745	0.26791
FRA	0.129475	0.119253	0.0434382	0.0865416	0.183705	0.0535064	0.289427
CRI	0.168641	0.154653	0.0685162	0.0923301	0.269227	0.0732367	0.376904
AUT	0.128435	0.120975	0.0486291	0.0828955	0.195489	0.0351776	0.324952
GHA	0.181153	0.173746	0.0591693	0.11013	0.266766	0.0908651	0.356916
MEX	0.127366	0.116392	0.0530324	0.0775874	0.204138	0.0506056	0.326574
HTI	0.159085	0.141986	0.0701043	0.0945211	0.236076	0.0584601	0.459934
JPN	0.211952	0.18916	0.0900316	0.13137	0.318026	0.0641518	0.71537
NPL	0.156842	0.15236	0.0551243	0.0930586	0.23664	0.063962	0.311575
BGR	0.146171	0.134245	0.0567403	0.08355	0.217605	0.0612292	0.332011
DNK	0.117735	0.110164	0.0457389	0.0698828	0.170002	0.0452372	0.315769
MMR	0.170041	0.159777	0.0763224	0.0998037	0.239323	0.0749908	0.611539
SWZ	0.121378	0.112912	0.0466863	0.0712924	0.166664	0.0501723	0.3166
CYP	0.160427	0.159292	0.0537422	0.0902422	0.224452	0.0684772	0.334875
ROU	0.162622	0.155216	0.053345	0.098603	0.23388	0.067223	0.340778
DOM	0.136808	0.136267	0.0463601	0.0817959	0.19611	0.0474415	0.288066
BRA	0.133477	0.126957	0.0553576	0.0739025	0.194528	0.0608243	0.368093
ITA	0.148418	0.138335	0.0491477	0.0996122	0.200507	0.0707672	0.410339
SYR	0.148894	0.143663	0.0484016	0.0931683	0.200812	0.0722977	0.368017
CHL	0.0995734	0.0952129	0.0331999	0.0591791	0.142733	0.0393657	0.202384
BEL	0.12588	0.115795	0.0452565	0.0776098	0.182409	0.0471377	0.263637
EST	0.131432	0.124292	0.0458097	0.0852705	0.191217	0.0540118	0.314579
LBN	0.217361	0.206392	0.082193	0.125193	0.328576	0.0974591	0.533783
GIN	0.176108	0.173506	0.0605895	0.103343	0.253742	0.0659586	0.339058
BRN	0.143677	0.131755	0.0512744	0.0887801	0.212094	0.0682657	0.299327
MNG	0.120252	0.114816	0.0531849	0.0665641	0.181501	0.0464455	0.385682
PRY	0.130609	0.121756	0.0502019	0.0752722	0.195117	0.0489234	0.269305
USA	0.118024	0.106456	0.0412588	0.0762207	0.183503	0.0556719	0.269236
RWA	0.157041	0.148651	0.0541823	0.09815	0.238393	0.0670991	0.310244
PRK	0.14206	0.132496	0.0499464	0.0892684	0.213463	0.0604318	0.336554
NGA	0.138986	0.125967	0.0529637	0.0892835	0.202239	0.0504469	0.365025
BWA	0.110273	0.0984949	0.0484252	0.0660716	0.159659	0.0460325	0.323444
NOR	0.183025	0.180415	0.0667833	0.108447	0.257361	0.0715797	0.41368
BIH	0.214923	0.202963	0.0775892	0.120371	0.314559	0.0766885	0.447274
BOL	0.184146	0.165011	0.0685089	0.118323	0.267114	0.0727291	0.493499
AZE	0.161889	0.148847	0.0650523	0.0869793	0.247478	0.0564901	0.406943
BLR	0.202632	0.188974	0.0737404	0.12542	0.308563	0.0974858	0.426885
KOR	0.130868	0.125104	0.0503514	0.077281	0.18738	0.0491484	0.336481
RUS	0.121397	0.110766	0.049668	0.0737801	0.182625	0.0547073	0.323364
PER	0.145978	0.136332	0.0533959	0.0831667	0.222557	0.0584571	0.360642
VNM	0.132292	0.123765	0.0466384	0.0796972	0.18236	0.0563884	0.353851
PSE	0.161175	0.152648	0.0482225	0.104762	0.228235	0.092952	0.339574
TUN	0.122455	0.11508	0.0441502	0.0766293	0.176612	0.0527218	0.301431
NLD	0.128142	0.11464	0.0648111	0.0693053	0.194705	0.0425806	0.451957
GTM	0.16034	0.151816	0.0613287	0.0931194	0.252451	0.043915	0.347334
URY	0.0950959	0.0871339	0.0331603	0.0597713	0.14483	0.0358648	0.186257
HRV	0.157143	0.144484	0.0633488	0.0856793	0.246618	0.0626122	0.37421
IDN	0.142329	0.130544	0.0537275	0.0864121	0.217431	0.0664025	0.325239
LAO	0.147507	0.14199	0.0458554	0.0953645	0.212847	0.0643131	0.272353
GUY	0.143938	0.133477	0.0532072	0.0847452	0.214937	0.0692607	0.381288
SLB	0.170978	0.163346	0.0703997	0.10393	0.254178	0.0563849	0.479578
ISL	0.285846	0.267024	0.127135	0.144971	0.49693	0.102337	0.643493
MOZ	0.160857	0.148466	0.0562142	0.104731	0.232515	0.0585501	0.357129
MLI	0.117992	0.11053	0.0423605	0.0768329	0.156658	0.0436859	0.268802
PHL	0.128997	0.115298	0.0483552	0.0781944	0.199079	0.0544142	0.299107
CAN	0.120838	0.113265	0.0420993	0.0760115	0.182682	0.0542175	0.24551
CMR	0.154051	0.147791	0.0525417	0.100084	0.205165	0.0708545	0.399145
FJI	0.140003	0.131177	0.0583475	0.0770414	0.211974	0.0559327	0.401402
CIV	0.154289	0.149544	0.0536684	0.0944402	0.225174	0.0495405	0.309493
TUR	0.191952	0.169901	0.08036	0.110327	0.294313	0.0782283	0.511198
LBR	0.170748	0.161616	0.0668088	0.0932563	0.245607	0.0599891	0.484014
BEN	0.140471	0.128114	0.053237	0.0773741	0.211961	0.0446463	0.313174

## Sheet: Stats_HTL
	mean	median	std	p10	p90	min	max
CHE	0.109004	0.106628	0.020154	0.0844352	0.139761	0.0735872	0.167672
SLV	0.0853892	0.0849939	0.0158844	0.0659974	0.104931	0.0542409	0.146213
ARG	0.0815065	0.0792497	0.0175294	0.0608695	0.102261	0.0506639	0.146084
PAN	0.0759486	0.0743669	0.012494	0.0625253	0.0925604	0.0533854	0.124987
UKR	0.100562	0.0977588	0.0187613	0.0784361	0.126835	0.0682727	0.14817
GEO	0.063652	0.061097	0.0111345	0.0519766	0.0777717	0.0464793	0.100267
CUB	0.100357	0.0994916	0.0209522	0.0721545	0.12725	0.0547885	0.146177
ECU	0.0893073	0.0848167	0.0192928	0.0685359	0.115522	0.0509691	0.153438
DEU	0.101545	0.0995207	0.0162123	0.081252	0.12348	0.0702406	0.14391
BFA	0.0669111	0.0664356	0.013823	0.0495164	0.0867504	0.0395586	0.106662
MDG	0.0599572	0.059679	0.0107541	0.0463993	0.0745731	0.0388302	0.0865469
KGZ	0.0728177	0.0721672	0.0130762	0.0559456	0.0902887	0.0481836	0.106801
IRQ	0.0790238	0.0789236	0.0144129	0.0621893	0.0967722	0.0457394	0.122054
SOM	0.0762427	0.0753683	0.0141345	0.0617449	0.0949479	0.0505572	0.120354
NAM	0.0641963	0.0629509	0.012999	0.0483378	0.0852471	0.0388476	0.0961663
ARE	0.0692201	0.069354	0.00897876	0.0578868	0.0819858	0.050422	0.0895348
HUN	0.0767312	0.0750262	0.0126015	0.0611643	0.0924743	0.050673	0.12968
SEN	0.0515	0.0489775	0.0109108	0.0397028	0.0679355	0.0297744	0.0804018
LBY	0.0518979	0.0516607	0.00801674	0.0410554	0.0619248	0.0353131	0.072423
SDN	0.0830417	0.0841458	0.018133	0.0594491	0.105361	0.0451119	0.128933
MYS	0.0605008	0.060339	0.0103794	0.0465546	0.0746647	0.0401663	0.0858707
SUR	0.0687648	0.0658901	0.0160252	0.05245	0.0856613	0.0438435	0.141236
BLZ	0.090606	0.0893495	0.0162041	0.0704465	0.112795	0.0604091	0.142996
SVN	0.0942778	0.0928982	0.0158886	0.0764717	0.115936	0.0658222	0.152111
CZE	0.0689884	0.0682089	0.0110904	0.0539051	0.0831817	0.0481399	0.099508
IRN	0.0763334	0.0755285	0.0128719	0.0616772	0.0900551	0.0470571	0.116651
SLE	0.072987	0.0708546	0.0158123	0.0569494	0.092584	0.0437225	0.126406
JOR	0.0705426	0.0689933	0.0117467	0.0570261	0.0837853	0.0515073	0.11685
LTU	0.0787543	0.0781546	0.0107972	0.0663213	0.0918845	0.055166	0.103815
SWE	0.0686196	0.068727	0.0107108	0.0555215	0.0827311	0.0477296	0.108262
POL	0.0824513	0.0808354	0.0124067	0.0652515	0.0982772	0.0557142	0.119317
TZA	0.0632299	0.0620577	0.0119765	0.0499871	0.0782788	0.0390519	0.112315
VEN	0.107154	0.107241	0.0224015	0.0765829	0.134943	0.0613624	0.164781
KEN	0.0843394	0.0834517	0.0140203	0.0671676	0.103122	0.0566876	0.135509
SVK	0.0840122	0.0816785	0.0131058	0.0682662	0.0994799	0.0624419	0.12494
GBR	0.103083	0.102953	0.0150594	0.0832937	0.122217	0.0725543	0.150299
MAR	0.0577539	0.0579371	0.00949094	0.0454084	0.0712765	0.035447	0.0824295
AGO	0.0663227	0.0643673	0.0120781	0.0526546	0.0828675	0.0345372	0.0937528
KWT	0.0560614	0.0549128	0.00820115	0.0459844	0.0668242	0.0411766	0.0800463
UGA	0.0600601	0.0589238	0.0131885	0.0450422	0.0765063	0.0329973	0.103501
KHM	0.0708842	0.070954	0.0119744	0.0559766	0.0874796	0.0483508	0.104129
COD	0.0752573	0.0732495	0.0131987	0.0589367	0.0931416	0.0507707	0.110859
QAT	0.0543028	0.0536045	0.00731475	0.0460559	0.0644487	0.0404478	0.071883
BGD	0.0765646	0.0762312	0.0129599	0.0598088	0.0934551	0.053213	0.118477
GRC	0.0893447	0.087933	0.0144931	0.0723781	0.107149	0.0613398	0.131151
IND	0.0570024	0.0553548	0.0096603	0.0463436	0.0704218	0.0384234	0.0877578
MDA	0.0811611	0.0803247	0.0145821	0.064631	0.0975551	0.0537479	0.127403
GAB	0.0851188	0.0838526	0.014704	0.0659184	0.105822	0.0547321	0.117894
MWI	0.0684432	0.067878	0.0134378	0.0518398	0.0871672	0.0383746	0.0996524
EGY	0.0669331	0.0658275	0.0121828	0.0533303	0.0841921	0.0407095	0.101289
MNE	0.0865145	0.0849168	0.0120354	0.0714221	0.102952	0.0584762	0.118443
ZAF	0.0591365	0.058177	0.0105882	0.0459334	0.0729942	0.0399578	0.0931515
MKD	0.0814975	0.0790101	0.0137855	0.0648545	0.100347	0.0529129	0.121378
BHS	0.0781682	0.0771062	0.0118991	0.0648148	0.0970441	0.0534929	0.108186
ZWE	0.073218	0.0701284	0.0148467	0.0564892	0.0942229	0.0427987	0.124944
IRL	0.0955203	0.0952924	0.012852	0.0812488	0.110632	0.0688341	0.135245
LKA	0.0859781	0.0855546	0.0165609	0.0667699	0.108359	0.0563458	0.139278
SRB	0.0819056	0.0814627	0.0130034	0.0657324	0.100601	0.0572028	0.11929
COG	0.0788547	0.0781133	0.0138944	0.0620634	0.0954881	0.0563833	0.124468
NZL	0.0870673	0.0857668	0.0128982	0.0705982	0.106533	0.0581481	0.120687
LVA	0.0810657	0.0799409	0.0124924	0.0659173	0.0963712	0.0588394	0.123987
AUS	0.0889227	0.086978	0.0155778	0.0707107	0.110397	0.0576285	0.138014
FLK	0.0918611	0.0901491	0.0172751	0.0727941	0.111923	0.0585245	0.151222
ISR	0.073957	0.0718483	0.0121168	0.0599775	0.0916069	0.0504723	0.112569
COL	0.0608778	0.0586672	0.0110742	0.0465336	0.0737171	0.0403784	0.0882368
FIN	0.102206	0.099504	0.0191821	0.0828871	0.126207	0.0661187	0.194845
GMB	0.0562867	0.0551155	0.0113577	0.041956	0.0715696	0.0316427	0.086179
PRT	0.0869139	0.0862506	0.0138341	0.0719606	0.106474	0.0635044	0.121638
SAU	0.0806848	0.0796992	0.0127417	0.0640789	0.0981121	0.0564727	0.114841
PNG	0.0733779	0.0712136	0.0137946	0.0587728	0.0912472	0.0425145	0.114886
JAM	0.0745715	0.0726624	0.01157	0.0618334	0.0898802	0.0514881	0.105748
PAK	0.0848981	0.0836921	0.0154375	0.0667933	0.104678	0.0520372	0.127788
ZMB	0.0741452	0.0734242	0.015675	0.0546884	0.0948551	0.0381116	0.116377
CHN	0.0491536	0.047928	0.00880539	0.0396231	0.0612741	0.0358427	0.0752693
KAZ	0.0628463	0.0621051	0.0102823	0.0510542	0.0758954	0.0428865	0.0941206
ARM	0.0709229	0.0705241	0.012599	0.0556873	0.0852646	0.047358	0.102317
LUX	0.0996876	0.0970071	0.0158388	0.0803391	0.121151	0.0681591	0.147864
ALB	0.0778175	0.0759138	0.0132117	0.0638759	0.0935913	0.0531902	0.143417
HND	0.0796027	0.0781683	0.0124497	0.0649947	0.0951476	0.0539415	0.114088
NIC	0.0624216	0.0602804	0.0121609	0.0496837	0.0792394	0.0411946	0.101828
NER	0.0694867	0.0680435	0.0151961	0.0509504	0.0926919	0.0369531	0.106846
ETH	0.0835179	0.0817869	0.0162704	0.06305	0.105022	0.0487831	0.132971
GRL	0.0873385	0.0856412	0.0186997	0.067374	0.106193	0.0592185	0.164254
OMN	0.0786713	0.0777322	0.0132976	0.0620722	0.0975791	0.0508903	0.114386
ESP	0.0996981	0.0981762	0.0149221	0.0803497	0.117918	0.0723547	0.136027
TJK	0.0723748	0.0721384	0.0113926	0.0592362	0.0857626	0.0475406	0.11946
YEM	0.0972431	0.094549	0.018381	0.0769076	0.124874	0.0605781	0.153552
THA	0.0576392	0.0564775	0.0101586	0.045237	0.0698801	0.0385003	0.087226
UZB	0.0651996	0.0644073	0.0108535	0.0519457	0.0800208	0.0414143	0.0968345
DZA	0.0566197	0.0558775	0.00928426	0.0445523	0.0706574	0.0365327	0.081981
FRA	0.10131	0.10111	0.0137596	0.0863635	0.121155	0.0722342	0.135634
CRI	0.0790702	0.0780977	0.0114712	0.0633145	0.0939467	0.0552912	0.10315
AUT	0.0765298	0.0742487	0.0105018	0.0627532	0.0903045	0.0568749	0.108121
GHA	0.0785345	0.0780983	0.0149128	0.0596788	0.097806	0.0440514	0.118657
MEX	0.0544174	0.053161	0.00991455	0.0432894	0.067038	0.0363287	0.0887585
HTI	0.0869709	0.0844108	0.0166875	0.0654797	0.108929	0.0495984	0.131498
JPN	0.117662	0.1156	0.0179043	0.0956461	0.137417	0.0797777	0.192693
NPL	0.0741315	0.0711243	0.013078	0.0583367	0.0927386	0.0488914	0.112082
BGR	0.0841451	0.0832415	0.013079	0.067065	0.101203	0.0585765	0.113788
DNK	0.0986548	0.0962615	0.0146718	0.0823319	0.118913	0.076546	0.147493
MMR	0.0844055	0.0847763	0.0153079	0.065508	0.103486	0.0514152	0.120216
SWZ	0.0586442	0.0575032	0.0103849	0.0476517	0.0718013	0.0372847	0.0891721
CYP	0.0912928	0.0900681	0.0168332	0.0711344	0.109878	0.0603224	0.146289
ROU	0.0918059	0.08899	0.0141901	0.0747838	0.110349	0.0603618	0.130333
DOM	0.0750415	0.072839	0.0122669	0.0616009	0.091355	0.0471482	0.106924
BRA	0.0581437	0.0569694	0.0111162	0.045671	0.0731248	0.0354787	0.0916057
ITA	0.0779552	0.0765819	0.0118434	0.0634796	0.0908314	0.0568639	0.120199
SYR	0.0945785	0.0952595	0.0183115	0.0718493	0.117675	0.0565807	0.14745
CHL	0.0565707	0.0550743	0.0103021	0.0438962	0.0705362	0.0362385	0.0833689
BEL	0.0953569	0.0954006	0.0138548	0.0776416	0.114994	0.0672503	0.125767
EST	0.0782993	0.0774502	0.0101865	0.0664297	0.091753	0.0570309	0.102452
LBN	0.111232	0.109788	0.0209264	0.0877664	0.136147	0.07606	0.175709
GIN	0.0751687	0.0748714	0.0155717	0.0564887	0.0953963	0.0417465	0.121617
BRN	0.070258	0.0697695	0.0116282	0.0564839	0.0851872	0.0506776	0.111688
MNG	0.0729822	0.0707314	0.012683	0.057313	0.090054	0.0449268	0.104637
PRY	0.0611964	0.0608521	0.0101685	0.0467147	0.0749368	0.0406135	0.0930232
USA	0.0727089	0.0710444	0.0116095	0.0588819	0.0863049	0.0518749	0.110581
RWA	0.062237	0.0621695	0.011747	0.0474823	0.0762497	0.0383148	0.0993575
PRK	0.0918306	0.0893501	0.0174537	0.0724026	0.117183	0.055855	0.136305
NGA	0.0672058	0.0650057	0.0130748	0.0525499	0.0861633	0.0433704	0.110842
BWA	0.0517216	0.0497568	0.00965359	0.041207	0.065172	0.0320888	0.0805313
NOR	0.100427	0.0978752	0.0167619	0.0817826	0.125056	0.0705994	0.149101
BIH	0.088553	0.0874394	0.0159778	0.0699731	0.10977	0.0577238	0.134943
BOL	0.0861981	0.0848832	0.0168934	0.0668473	0.10875	0.0484754	0.147428
AZE	0.073966	0.0717099	0.0109138	0.0600698	0.0872685	0.0497417	0.104483
BLR	0.110072	0.108423	0.0218796	0.0817221	0.141954	0.0653125	0.169769
KOR	0.0800337	0.0774903	0.0145038	0.0635363	0.0954007	0.0519482	0.132072
RUS	0.0700358	0.0687096	0.0117528	0.0572552	0.086327	0.046968	0.0972564
PER	0.0597758	0.0589909	0.0108815	0.0467468	0.0725125	0.0358785	0.0882623
VNM	0.0665712	0.0652124	0.0110007	0.054973	0.0824545	0.0446739	0.0958823
PSE	0.107406	0.107173	0.020741	0.0769949	0.135167	0.0688166	0.16674
TUN	0.0709151	0.0697887	0.0117352	0.0558808	0.0871326	0.0439345	0.0991569
NLD	0.0911463	0.0873796	0.0146988	0.0749611	0.11024	0.0623214	0.131901
GTM	0.0765676	0.0757717	0.0116221	0.061953	0.0901698	0.0528685	0.11911
URY	0.0547169	0.0545002	0.00887904	0.0440426	0.0638121	0.0328362	0.0815894
HRV	0.086594	0.0844925	0.0148866	0.0692127	0.10513	0.059842	0.141561
IDN	0.0694758	0.0685605	0.00964983	0.0573445	0.0825102	0.0456787	0.100147
LAO	0.0827411	0.0802517	0.0147697	0.0652123	0.101785	0.0563718	0.126922
GUY	0.0597184	0.0597509	0.0104855	0.0446432	0.0740973	0.0389728	0.0870477
SLB	0.0784244	0.0775569	0.0130648	0.0620505	0.095357	0.0516284	0.115366
ISL	0.111891	0.109193	0.0224636	0.0873378	0.139555	0.0664069	0.206132
MOZ	0.072118	0.0694018	0.0148428	0.0536214	0.0888939	0.0428849	0.114003
MLI	0.0684321	0.0676856	0.0141551	0.0514473	0.0872899	0.0411828	0.118736
PHL	0.0616613	0.0609636	0.0109916	0.0488947	0.0735489	0.0393437	0.091018
CAN	0.0905439	0.0910504	0.0143544	0.0723288	0.107906	0.0605649	0.140574
CMR	0.069957	0.068323	0.0154586	0.0512036	0.0920615	0.0363536	0.109171
FJI	0.0772556	0.0758645	0.0137778	0.0611349	0.0960351	0.0549495	0.123044
CIV	0.0613645	0.0584038	0.0112652	0.0493341	0.0795605	0.0365379	0.0972323
TUR	0.0962228	0.0950594	0.0147585	0.078637	0.113897	0.0630119	0.137931
LBR	0.0737774	0.0722454	0.0142019	0.0563606	0.0944881	0.0427448	0.107605
BEN	0.0629236	0.0616151	0.00998014	0.0515032	0.0758379	0.0398095	0.0863364

[truncated: 19 more sheets: Stats_HTSE, Stats_HVO_diesel, Stats_HVO_kerosene, Stats_M_PYR, Stats_PTM, Stats_RWGS_FT_diesel, Stats_RWGS_FT_kerosene, Stats_RWGS_MeOH_methanol, Stats_RWGS_MeOH_DME, Stats_RWGS_MeOH_kerosene, Stats_SMR_CCS, Stats_SOEC, Stats_SR_FT_diesel, Stats_SR_FT_kerosene, Stats_ST_FT_diesel, Stats_ST_FT_kerosene, Stats_TG_CCS, Stats_TG_FT_diesel, Stats_TG_FT_kerosene]
