# Supplementary material for: Global cost drivers and regional trade-offs for low-carbon fuels: a prospective techno-economic assessment
Source: Royal Society of Chemistry journal article supplement (doi:10.1039/d5ee05591a), 2026-01-01
Supplement: d5ee05591a2.zip [file monte_carlo_stats_Base24.xlsx]

## Sheet: Stats_PEM
	mean	median	std	p10	p90	min	max
CHE	0.244764	0.239707	0.0359879	0.202733	0.291924	0.173791	0.376942
SLV	0.213994	0.212036	0.0291663	0.175597	0.254792	0.14655	0.298787
ARG	0.239589	0.2341	0.0427991	0.190458	0.298006	0.161759	0.340756
PAN	0.183802	0.180976	0.0293035	0.148274	0.220792	0.122472	0.284464
UKR	0.240297	0.238899	0.040343	0.192788	0.290749	0.174545	0.343453
GEO	0.171155	0.166573	0.0299549	0.138127	0.203896	0.114226	0.303141
CUB	0.249841	0.249347	0.0378391	0.20606	0.299587	0.178797	0.355642
ECU	0.233328	0.234731	0.0335876	0.193857	0.277488	0.171943	0.352579
DEU	0.200918	0.198787	0.0295741	0.165985	0.235784	0.145759	0.313121
BFA	0.180163	0.180035	0.0260546	0.148128	0.21507	0.123435	0.259836
MDG	0.163752	0.162543	0.0264447	0.133531	0.199834	0.101594	0.226521
KGZ	0.189088	0.185874	0.0309092	0.154752	0.239572	0.132368	0.288034
IRQ	0.207078	0.205825	0.0353757	0.165367	0.250012	0.128764	0.307919
SOM	0.205957	0.202041	0.0299198	0.166401	0.24325	0.150472	0.322348
NAM	0.170237	0.171292	0.0265332	0.135629	0.204545	0.119116	0.236344
ARE	0.1648	0.160351	0.0258991	0.137181	0.196331	0.108027	0.241497
HUN	0.195302	0.190514	0.0281454	0.166663	0.229912	0.145524	0.291844
SEN	0.157364	0.153484	0.0256834	0.126236	0.193551	0.11084	0.223393
LBY	0.159969	0.162316	0.0241999	0.127387	0.190155	0.111201	0.221345
SDN	0.263327	0.256158	0.0466082	0.201599	0.320045	0.164946	0.446497
MYS	0.169039	0.166508	0.0277345	0.13751	0.208878	0.109335	0.25053
SUR	0.210858	0.208551	0.0337206	0.16824	0.250895	0.128522	0.297687
BLZ	0.223552	0.223051	0.0332474	0.186131	0.271218	0.148752	0.322599
SVN	0.213529	0.210719	0.0297149	0.179082	0.259625	0.153894	0.286753
CZE	0.193657	0.188832	0.0356414	0.155528	0.23737	0.115225	0.353411
IRN	0.19444	0.190887	0.0314293	0.15662	0.237004	0.127801	0.294319
SLE	0.191081	0.190608	0.0331378	0.146829	0.231964	0.127202	0.27809
JOR	0.178791	0.177119	0.0281629	0.143997	0.214684	0.121462	0.29961
LTU	0.193682	0.192228	0.0304415	0.156265	0.237207	0.126699	0.267622
SWE	0.172715	0.171478	0.0268968	0.141979	0.208565	0.109279	0.244611
POL	0.199369	0.196409	0.030493	0.165111	0.236068	0.145669	0.349175
TZA	0.161321	0.162391	0.0279506	0.129283	0.198662	0.10455	0.250882
VEN	0.295966	0.294244	0.0450418	0.23255	0.357479	0.205742	0.409523
KEN	0.1873	0.184758	0.028213	0.151927	0.225385	0.133162	0.270396
SVK	0.198042	0.198166	0.0308075	0.156892	0.231589	0.14446	0.344342
GBR	0.204021	0.203497	0.0275996	0.172397	0.244354	0.147394	0.27638
MAR	0.175161	0.170491	0.0284936	0.142023	0.213038	0.119342	0.252707
AGO	0.178366	0.174918	0.0300192	0.143584	0.218398	0.118022	0.261842
KWT	0.153019	0.151367	0.0246445	0.124245	0.186713	0.103449	0.224393
UGA	0.173523	0.171957	0.0298705	0.139836	0.213344	0.110134	0.279506
KHM	0.175137	0.1765	0.0262851	0.141803	0.210427	0.117815	0.240586
COD	0.179239	0.174657	0.0292679	0.146624	0.220051	0.113457	0.279615
QAT	0.152052	0.152237	0.0248863	0.120344	0.184351	0.100568	0.224731
BGD	0.186627	0.184398	0.0296773	0.15263	0.219914	0.122137	0.319248
GRC	0.21518	0.211685	0.0343601	0.174317	0.25696	0.154894	0.301842
IND	0.19314	0.190889	0.031518	0.152414	0.230198	0.138877	0.301594
MDA	0.20169	0.200405	0.0325622	0.163427	0.250466	0.137353	0.300775
GAB	0.203332	0.198921	0.0311027	0.163861	0.242023	0.14024	0.310275
MWI	0.196495	0.193477	0.0335193	0.154883	0.24403	0.115575	0.273203
EGY	0.206816	0.204038	0.0384043	0.158524	0.261164	0.13385	0.315918
MNE	0.228454	0.227732	0.0309872	0.193197	0.272178	0.150189	0.300239
ZAF	0.158377	0.155321	0.0258014	0.126193	0.194215	0.107835	0.229143
MKD	0.225032	0.222551	0.0336545	0.185313	0.265317	0.150483	0.33723
BHS	0.195563	0.191955	0.0355775	0.154241	0.243976	0.123675	0.31315
ZWE	0.191827	0.188723	0.0322202	0.151461	0.232373	0.132001	0.311431
IRL	0.203165	0.200153	0.0287899	0.171869	0.243675	0.147526	0.297494
LKA	0.228379	0.222351	0.034941	0.187038	0.274686	0.167022	0.343853
SRB	0.224889	0.224117	0.0359231	0.185131	0.272003	0.151175	0.321154
COG	0.197618	0.195599	0.0312444	0.161682	0.243717	0.130893	0.271052
NZL	0.187724	0.184525	0.0292743	0.153643	0.228495	0.136879	0.275953
LVA	0.197224	0.193137	0.0298024	0.162304	0.23382	0.121836	0.311333
AUS	0.190066	0.185828	0.0304609	0.154439	0.231076	0.1305	0.272046
FLK	0.181007	0.179949	0.0258433	0.151279	0.208581	0.133332	0.288194
ISR	0.179752	0.178046	0.026524	0.145746	0.21167	0.120538	0.278709
COL	0.176603	0.175184	0.0273722	0.146069	0.211367	0.119628	0.259886
FIN	0.209181	0.208051	0.0305895	0.169754	0.248291	0.149505	0.306617
GMB	0.157206	0.155669	0.0254179	0.124046	0.190437	0.107578	0.222233
PRT	0.199267	0.194031	0.0293292	0.163526	0.2382	0.146816	0.270081
SAU	0.17791	0.177904	0.0252349	0.14773	0.208251	0.114227	0.236282
PNG	0.187161	0.18459	0.0308812	0.14967	0.23362	0.129023	0.266223
JAM	0.193982	0.189286	0.0342559	0.159838	0.229595	0.135805	0.40551
PAK	0.211832	0.208893	0.035411	0.168775	0.256997	0.137036	0.304313
ZMB	0.193748	0.192748	0.0311905	0.1519	0.23627	0.13466	0.297752
CHN	0.167622	0.165679	0.023326	0.139418	0.193871	0.106834	0.242397
KAZ	0.167872	0.166419	0.0261107	0.13755	0.199676	0.1074	0.241831
ARM	0.180253	0.178879	0.0262975	0.149752	0.220531	0.121588	0.236057
LUX	0.205658	0.202069	0.0307014	0.16949	0.242038	0.138784	0.303458
ALB	0.22223	0.215467	0.040294	0.172709	0.278272	0.133975	0.326961
HND	0.198809	0.19041	0.0335054	0.160306	0.243827	0.134913	0.308968
NIC	0.192606	0.184988	0.0328948	0.153282	0.238557	0.131614	0.278244
NER	0.193806	0.191396	0.0348304	0.155564	0.23661	0.112312	0.302621
ETH	0.205512	0.202981	0.0319943	0.166096	0.248449	0.134261	0.318958
GRL	0.198559	0.195836	0.0322043	0.161189	0.24378	0.127166	0.287052
OMN	0.18706	0.184483	0.0280552	0.155214	0.221919	0.124787	0.270832
ESP	0.206615	0.204562	0.0346508	0.165919	0.247782	0.141495	0.317167
TJK	0.193792	0.195489	0.0330303	0.151385	0.234865	0.126231	0.289217
YEM	0.240249	0.234802	0.0398206	0.191076	0.292417	0.165247	0.357982
THA	0.16481	0.166135	0.0226403	0.135937	0.192913	0.10751	0.242396
UZB	0.172781	0.17151	0.0316681	0.133175	0.215574	0.118664	0.262807
DZA	0.174584	0.172773	0.0318276	0.134372	0.212848	0.113407	0.314398
FRA	0.202312	0.195822	0.0286452	0.170947	0.237369	0.136724	0.27457
CRI	0.194688	0.187151	0.032075	0.157357	0.243904	0.136203	0.273972
AUT	0.180133	0.180247	0.0291681	0.143928	0.220485	0.125418	0.251464
GHA	0.194879	0.192389	0.0327333	0.155071	0.241757	0.137095	0.277645
MEX	0.17415	0.17156	0.0273521	0.140528	0.210864	0.120743	0.258254
HTI	0.232248	0.22929	0.0376167	0.187222	0.279097	0.148065	0.319163
JPN	0.253087	0.251038	0.0381476	0.208797	0.298269	0.175033	0.373524
NPL	0.172807	0.172329	0.0271305	0.138435	0.205873	0.112324	0.255656
BGR	0.200157	0.194578	0.0315674	0.162653	0.239605	0.13937	0.282583
DNK	0.188258	0.183569	0.0316387	0.152804	0.224683	0.118709	0.340166
MMR	0.214231	0.212718	0.0352751	0.169678	0.258883	0.126462	0.31894
SWZ	0.163623	0.163453	0.0276919	0.128289	0.200829	0.112229	0.243057
CYP	0.211499	0.206994	0.0338677	0.174898	0.256559	0.130431	0.307284
ROU	0.215931	0.211872	0.0336842	0.179033	0.263253	0.149183	0.322402
DOM	0.191945	0.188605	0.0305769	0.155925	0.235884	0.131059	0.27457
BRA	0.172181	0.17076	0.0258961	0.139155	0.201868	0.128069	0.255283
ITA	0.204022	0.198709	0.0310445	0.163235	0.246406	0.146334	0.281831
SYR	0.264828	0.263828	0.0460247	0.211307	0.321481	0.167792	0.378549
CHL	0.161328	0.158802	0.0222502	0.133909	0.191497	0.109629	0.221782
BEL	0.20342	0.199652	0.0285964	0.172002	0.242974	0.14212	0.285372
EST	0.189368	0.182888	0.031254	0.156272	0.231693	0.126916	0.289804
LBN	0.275494	0.268737	0.0478245	0.22624	0.338358	0.178651	0.409389
GIN	0.193754	0.190415	0.0304629	0.155571	0.232793	0.127923	0.284861
BRN	0.162182	0.160817	0.0268247	0.131515	0.194708	0.104336	0.268694
MNG	0.186231	0.181621	0.0280976	0.154464	0.224937	0.132179	0.295828
PRY	0.175645	0.175522	0.0271016	0.142757	0.210926	0.11517	0.262964
USA	0.188531	0.185404	0.0281007	0.157015	0.225607	0.118027	0.266206
RWA	0.168998	0.165462	0.0246294	0.139953	0.195137	0.120897	0.255893
PRK	0.237758	0.240242	0.0377717	0.189764	0.279497	0.165206	0.334616
NGA	0.181468	0.18008	0.0294983	0.145109	0.218103	0.107518	0.257547
BWA	0.136787	0.134516	0.0198305	0.113057	0.163444	0.102514	0.207482
NOR	0.238043	0.234887	0.0383088	0.191667	0.284193	0.165358	0.364665
BIH	0.247731	0.248542	0.0411379	0.198604	0.300825	0.169842	0.37318
BOL	0.243113	0.237737	0.0401424	0.20077	0.291168	0.183845	0.441625
AZE	0.179444	0.174675	0.0280122	0.149063	0.2187	0.122354	0.260635
BLR	0.281864	0.2789	0.0473683	0.221743	0.339633	0.174521	0.38715
KOR	0.185062	0.180775	0.025327	0.151345	0.219339	0.139972	0.252435
RUS	0.176405	0.171355	0.0324609	0.142652	0.219905	0.121407	0.281388
PER	0.172801	0.16932	0.028408	0.139968	0.209947	0.120461	0.24865
VNM	0.174048	0.173795	0.0315254	0.134511	0.21667	0.104926	0.270205
PSE	0.277915	0.277651	0.0432244	0.226485	0.331742	0.178163	0.402017
TUN	0.213408	0.210769	0.0356243	0.166834	0.262867	0.143554	0.297536
NLD	0.200035	0.202933	0.0269441	0.16448	0.233677	0.146899	0.275562
GTM	0.186989	0.181695	0.0309386	0.151218	0.230215	0.131258	0.267554
URY	0.165998	0.163323	0.0291219	0.134908	0.19895	0.110559	0.281209
HRV	0.206257	0.204153	0.0293933	0.173333	0.240782	0.143098	0.295317
IDN	0.168591	0.168335	0.0251571	0.13981	0.201935	0.113417	0.248
LAO	0.214259	0.21356	0.0341776	0.168301	0.258394	0.143027	0.299898
GUY	0.178619	0.178448	0.0297635	0.140642	0.215386	0.106216	0.300304
SLB	0.194381	0.187128	0.034412	0.157246	0.243496	0.117561	0.28631
ISL	0.235438	0.230218	0.0357928	0.195552	0.284533	0.160094	0.320078
MOZ	0.199415	0.198909	0.031688	0.156665	0.237733	0.123953	0.308691
MLI	0.193315	0.191226	0.0284641	0.155597	0.227093	0.123434	0.270805
PHL	0.15877	0.157128	0.0235123	0.132492	0.185522	0.10718	0.235686
CAN	0.183901	0.178551	0.0271757	0.15188	0.218408	0.134433	0.270206
CMR	0.181379	0.180549	0.030034	0.149977	0.210553	0.125693	0.346714
FJI	0.184247	0.184801	0.0253661	0.149292	0.214469	0.12616	0.259334
CIV	0.155447	0.152804	0.0268955	0.123324	0.181967	0.103662	0.243522
TUR	0.245969	0.242306	0.0395404	0.19239	0.295744	0.16382	0.348019
LBR	0.193055	0.193381	0.0286929	0.158791	0.229701	0.119167	0.282175
BEN	0.161126	0.159494	0.0238638	0.132093	0.191594	0.102599	0.230773

## Sheet: Stats_DAC
	mean	median	std	p10	p90	min	max
CHE	0.61533	0.599823	0.10708	0.494513	0.752742	0.403066	0.936799
SLV	0.43373	0.423829	0.0715247	0.353995	0.526256	0.28502	0.618355
ARG	0.441873	0.434642	0.0750379	0.350873	0.550983	0.279736	0.643384
PAN	0.411282	0.403333	0.0668314	0.333483	0.491493	0.255256	0.656984
UKR	0.441066	0.430775	0.0714672	0.357597	0.548877	0.269963	0.64226
GEO	0.353575	0.356871	0.0779753	0.257602	0.457037	0.18839	0.587265
CUB	0.475939	0.459714	0.0866762	0.375598	0.583935	0.336581	0.836856
ECU	0.453896	0.450031	0.0751538	0.365123	0.550586	0.302604	0.689301
DEU	0.507818	0.502716	0.0883359	0.408486	0.624743	0.302871	0.730912
BFA	0.34324	0.336783	0.0711589	0.267696	0.413022	0.220152	0.72546
MDG	0.313498	0.299712	0.0607944	0.244752	0.409769	0.206028	0.472748
KGZ	0.363207	0.352191	0.0721414	0.284542	0.468585	0.213013	0.555552
IRQ	0.400401	0.388687	0.0704788	0.319805	0.491375	0.274244	0.63798
SOM	0.369375	0.362349	0.0623529	0.289996	0.453723	0.249448	0.581099
NAM	0.342046	0.335638	0.0631696	0.268644	0.435067	0.214304	0.486875
ARE	0.383266	0.37782	0.0645913	0.301008	0.468475	0.256383	0.57617
HUN	0.446174	0.429747	0.0804195	0.358943	0.559245	0.28575	0.670362
SEN	0.314503	0.308126	0.0568586	0.243589	0.392081	0.18372	0.506502
LBY	0.345965	0.341516	0.0599654	0.279604	0.424956	0.226068	0.504665
SDN	0.44951	0.445334	0.0870639	0.342714	0.553755	0.247234	0.736193
MYS	0.372371	0.358432	0.0585447	0.306595	0.44319	0.261845	0.55544
SUR	0.418253	0.415569	0.0722453	0.342219	0.498058	0.233277	0.673575
BLZ	0.436449	0.421452	0.082353	0.339486	0.550049	0.283823	0.674771
SVN	0.521283	0.521915	0.0894509	0.407918	0.64078	0.327386	0.726737
CZE	0.454648	0.444875	0.0868647	0.366024	0.589555	0.286178	0.706505
IRN	0.380664	0.37317	0.0671345	0.307728	0.457692	0.250324	0.706603
SLE	0.35213	0.355327	0.0529942	0.280681	0.415164	0.218705	0.479526
JOR	0.378572	0.369155	0.0626966	0.303751	0.462678	0.24836	0.547909
LTU	0.473816	0.458661	0.0962831	0.364891	0.603917	0.315016	0.807085
SWE	0.409542	0.411097	0.0628597	0.334741	0.484448	0.27145	0.613327
POL	0.488017	0.471878	0.0837947	0.389373	0.609993	0.349534	0.762523
TZA	0.322153	0.309387	0.0602592	0.254628	0.412895	0.215581	0.511416
VEN	0.531452	0.524386	0.0777512	0.438969	0.632755	0.357237	0.752225
KEN	0.340565	0.340011	0.0543623	0.270199	0.421199	0.240469	0.47682
SVK	0.45512	0.437483	0.0890227	0.355778	0.583501	0.286804	0.728627
GBR	0.502624	0.500684	0.0734421	0.404941	0.585914	0.324777	0.742848
MAR	0.371386	0.362773	0.0654888	0.299682	0.444116	0.233339	0.64629
AGO	0.328066	0.32453	0.058903	0.255008	0.407981	0.228347	0.445613
KWT	0.332712	0.331194	0.0628655	0.254066	0.413062	0.211444	0.516649
UGA	0.330601	0.322098	0.0557629	0.27525	0.40624	0.205565	0.49395
KHM	0.348198	0.346435	0.0656233	0.263888	0.438833	0.214292	0.528488
COD	0.327199	0.320283	0.0600686	0.258587	0.400134	0.226842	0.523504
QAT	0.326443	0.327086	0.0672768	0.246832	0.415591	0.212688	0.49761
BGD	0.365219	0.359494	0.0573995	0.295375	0.438421	0.264155	0.550199
GRC	0.495094	0.47271	0.0904649	0.406397	0.601248	0.316288	0.783359
IND	0.443336	0.435846	0.080513	0.340666	0.552581	0.29392	0.727547
MDA	0.41248	0.404224	0.073833	0.324393	0.514864	0.258871	0.614194
GAB	0.360494	0.345693	0.064289	0.277593	0.451174	0.234229	0.516229
MWI	0.320154	0.316987	0.0583983	0.256029	0.39924	0.216094	0.485837
EGY	0.421496	0.408749	0.0750024	0.334394	0.526122	0.275032	0.62807
MNE	0.51171	0.498366	0.0969826	0.402817	0.636697	0.322149	0.806393
ZAF	0.316557	0.310559	0.051618	0.257699	0.36218	0.211637	0.514356
MKD	0.505838	0.490619	0.0964978	0.407454	0.641778	0.300776	0.825608
BHS	0.405706	0.392993	0.0727931	0.323907	0.489054	0.272499	0.710858
ZWE	0.352306	0.347284	0.0624339	0.278535	0.435277	0.240407	0.555262
IRL	0.497446	0.496803	0.0763906	0.397051	0.60671	0.320229	0.698808
LKA	0.396451	0.393775	0.0656456	0.322146	0.491568	0.270363	0.570275
SRB	0.498249	0.5042	0.0828522	0.394463	0.600272	0.325271	0.666147
COG	0.37141	0.367229	0.0580847	0.2981	0.454861	0.26758	0.52847
NZL	0.458054	0.444468	0.0876638	0.358173	0.583103	0.287939	0.734186
LVA	0.436182	0.430581	0.0721831	0.345592	0.529944	0.278185	0.623183
AUS	0.449266	0.446761	0.0634539	0.382165	0.532104	0.325918	0.62816
FLK	0.391879	0.385661	0.0717627	0.312515	0.487921	0.245031	0.651902
ISR	0.408329	0.403552	0.0686494	0.325062	0.509508	0.266365	0.595874
COL	0.368401	0.364174	0.0676422	0.289379	0.44343	0.236563	0.605573
FIN	0.491432	0.482801	0.0763649	0.395078	0.596796	0.328225	0.686316
GMB	0.307042	0.303388	0.0586749	0.234456	0.36962	0.200496	0.519746
PRT	0.459802	0.468196	0.0771291	0.369576	0.533833	0.249473	0.772951
SAU	0.425339	0.42773	0.0649201	0.346546	0.498	0.267059	0.600593
PNG	0.36624	0.356049	0.0648976	0.287741	0.453692	0.262182	0.546352
JAM	0.397771	0.392794	0.0743042	0.314419	0.502252	0.262879	0.665191
PAK	0.404732	0.393029	0.0576797	0.331632	0.476172	0.29577	0.65131
ZMB	0.339753	0.331895	0.0617129	0.270888	0.42688	0.236508	0.530659
CHN	0.379816	0.367059	0.0710611	0.302611	0.459528	0.261597	0.673914
KAZ	0.359928	0.358681	0.069874	0.271723	0.448046	0.22657	0.626093
ARM	0.366226	0.367057	0.0650581	0.292638	0.436463	0.208555	0.563821
LUX	0.512139	0.503034	0.0803353	0.407473	0.618362	0.352371	0.730068
ALB	0.483002	0.470343	0.0798822	0.394198	0.583584	0.313899	0.801009
HND	0.406995	0.388931	0.0757912	0.334253	0.507519	0.278987	0.703234
NIC	0.400789	0.392393	0.0738276	0.327214	0.495601	0.247676	0.640195
NER	0.337918	0.337938	0.063954	0.260085	0.423284	0.213611	0.502202
ETH	0.39535	0.386332	0.0680103	0.32196	0.469956	0.250557	0.626421
GRL	0.46436	0.459627	0.0763355	0.370957	0.563355	0.331346	0.707225
OMN	0.424057	0.40982	0.0718386	0.341528	0.530553	0.282102	0.619627
ESP	0.49691	0.492452	0.0727642	0.4154	0.580854	0.336108	0.686705
TJK	0.383856	0.377463	0.0718062	0.294906	0.48951	0.244593	0.576916
YEM	0.444869	0.430349	0.0765105	0.356112	0.553631	0.281207	0.61758
THA	0.356372	0.355341	0.0559538	0.286196	0.433432	0.20959	0.506065
UZB	0.358638	0.349606	0.0665263	0.283932	0.459743	0.195797	0.537711
DZA	0.35554	0.353575	0.0591316	0.29299	0.429474	0.190994	0.573076
FRA	0.497521	0.493777	0.0816727	0.400794	0.599416	0.311651	0.736602
CRI	0.429308	0.427195	0.0774674	0.34183	0.516242	0.30344	0.712192
AUT	0.410557	0.405519	0.0707504	0.319147	0.507024	0.26678	0.636561
GHA	0.354335	0.343432	0.0638993	0.284626	0.456742	0.2359	0.517275
MEX	0.379551	0.375489	0.0604747	0.30956	0.464276	0.277563	0.555542
HTI	0.427782	0.41911	0.0820233	0.328104	0.545214	0.208268	0.657635
JPN	0.618319	0.59131	0.116225	0.492058	0.770208	0.377425	1.06944
NPL	0.370681	0.360393	0.0690837	0.289117	0.449546	0.240905	0.59243
BGR	0.464978	0.458526	0.0834928	0.371271	0.583216	0.284132	0.74619
DNK	0.474275	0.473261	0.0862145	0.368296	0.574899	0.307907	0.771195
MMR	0.394994	0.391606	0.0746619	0.304539	0.485892	0.288373	0.689549
SWZ	0.310239	0.302703	0.0544183	0.256181	0.376481	0.205723	0.564939
CYP	0.503308	0.497605	0.106345	0.379785	0.624027	0.331713	0.892872
ROU	0.50377	0.472607	0.0877554	0.417092	0.615552	0.33727	0.87725
DOM	0.407098	0.394956	0.0702768	0.322273	0.519462	0.25207	0.556641
BRA	0.376367	0.369873	0.0809632	0.297005	0.484601	0.229519	0.699269
ITA	0.46892	0.465102	0.0775463	0.380672	0.562705	0.289126	0.776499
SYR	0.4359	0.423667	0.0784274	0.345792	0.542979	0.290761	0.70122
CHL	0.368721	0.359108	0.068813	0.294287	0.462321	0.199787	0.570702
BEL	0.498427	0.485695	0.0845313	0.396049	0.605718	0.32586	0.747097
EST	0.441751	0.432347	0.0753806	0.357477	0.557807	0.278209	0.673903
LBN	0.47295	0.464801	0.0714482	0.387109	0.560078	0.303742	0.704989
GIN	0.348323	0.343943	0.0573585	0.28276	0.418601	0.216121	0.539024
BRN	0.355555	0.342807	0.064656	0.278339	0.444157	0.245665	0.581856
MNG	0.371564	0.365632	0.065411	0.297455	0.440439	0.22274	0.563679
PRY	0.392591	0.377367	0.0674185	0.312433	0.484997	0.249159	0.551307
USA	0.428526	0.431402	0.0760145	0.336452	0.533462	0.262531	0.60136
RWA	0.313432	0.308859	0.0559322	0.25192	0.376524	0.16459	0.532225
PRK	0.42973	0.420786	0.0740123	0.351117	0.518103	0.292686	0.701317
NGA	0.332658	0.333799	0.0559072	0.26461	0.416268	0.184316	0.472796
BWA	0.281753	0.271191	0.0486365	0.221644	0.343119	0.197785	0.395277
NOR	0.586493	0.577071	0.0980668	0.469837	0.720681	0.403674	0.890263
BIH	0.523002	0.514792	0.0966269	0.409675	0.641646	0.356528	0.813988
BOL	0.481143	0.476802	0.0852613	0.371766	0.575488	0.323192	0.819003
AZE	0.3896	0.389005	0.0709969	0.303243	0.481144	0.230058	0.604511
BLR	0.48934	0.48137	0.0739158	0.39565	0.589042	0.336395	0.666951
KOR	0.432701	0.422665	0.0734946	0.343091	0.522034	0.259135	0.67208
RUS	0.381362	0.369869	0.081629	0.281611	0.482906	0.214567	0.631111
PER	0.382372	0.370921	0.0740612	0.30832	0.450993	0.262015	0.747856
VNM	0.37104	0.372554	0.0630636	0.293008	0.462196	0.259491	0.545913
PSE	0.475249	0.470333	0.0746281	0.378397	0.579602	0.312512	0.646723
TUN	0.401929	0.402187	0.0721655	0.321942	0.503391	0.237934	0.599189
NLD	0.507216	0.495	0.0791899	0.412592	0.607023	0.333498	0.741694
GTM	0.425624	0.419148	0.0750536	0.329219	0.536029	0.287646	0.613009
URY	0.367958	0.363251	0.0720814	0.288834	0.466023	0.215285	0.604412
HRV	0.480467	0.466323	0.0850198	0.38301	0.570352	0.295359	0.757943
IDN	0.372037	0.367372	0.0639463	0.300389	0.446122	0.238195	0.571054
LAO	0.402656	0.40655	0.0716209	0.308567	0.487191	0.26448	0.590163
GUY	0.387044	0.386468	0.068952	0.302271	0.471446	0.225911	0.558981
SLB	0.371518	0.368033	0.0609452	0.293572	0.448001	0.203195	0.531768
ISL	0.561204	0.548285	0.0882655	0.455888	0.693619	0.394563	0.80542
MOZ	0.362878	0.364014	0.0635388	0.284826	0.443898	0.245949	0.577852
MLI	0.333682	0.330429	0.0597938	0.268752	0.423862	0.174974	0.53869
PHL	0.341316	0.329177	0.0623613	0.268672	0.42836	0.212464	0.556866
CAN	0.444683	0.437442	0.0690381	0.363025	0.531779	0.297302	0.704478
CMR	0.334993	0.324682	0.0603329	0.25922	0.4124	0.220819	0.544792
FJI	0.405486	0.390996	0.0774922	0.330364	0.505519	0.289479	0.72088
CIV	0.314707	0.313433	0.0533622	0.241382	0.384291	0.206078	0.477409
TUR	0.547113	0.545339	0.0799861	0.444539	0.638996	0.371723	0.786071
LBR	0.337409	0.334709	0.0591127	0.263537	0.41251	0.22011	0.486047
BEN	0.312386	0.301624	0.0489311	0.254832	0.379948	0.18802	0.477783

## Sheet: Stats_AD
	mean	median	std	p10	p90	min	max
CHE	0.159582	0.160639	0.0162776	0.137951	0.181385	0.119337	0.199725
SLV	0.128043	0.126477	0.0130391	0.114053	0.144296	0.0961486	0.166181
ARG	0.130859	0.131332	0.0162599	0.110558	0.151559	0.0919898	0.166402
PAN	0.113939	0.114543	0.0101844	0.100229	0.127751	0.0894959	0.142787
UKR	0.158542	0.158838	0.018393	0.135736	0.184168	0.112903	0.197937
GEO	0.0990316	0.0996313	0.00840943	0.0879051	0.110391	0.0830647	0.123721
CUB	0.153129	0.151037	0.0194525	0.127902	0.173157	0.114283	0.20622
ECU	0.128399	0.129707	0.0165191	0.109035	0.150261	0.0934293	0.17035
DEU	0.154236	0.152566	0.0136391	0.138853	0.169594	0.115934	0.192364
BFA	0.104865	0.105396	0.0115329	0.0902317	0.120505	0.0770271	0.130768
MDG	0.0937266	0.09337	0.0105341	0.0803556	0.108424	0.0700018	0.118515
KGZ	0.114579	0.114435	0.013076	0.0989706	0.130087	0.0813998	0.14422
IRQ	0.130073	0.129917	0.0129487	0.113745	0.145899	0.104037	0.161991
SOM	0.12232	0.120753	0.015673	0.102784	0.140729	0.0939408	0.180641
NAM	0.0980624	0.0973632	0.0115835	0.0845175	0.115359	0.0716782	0.129893
ARE	0.110928	0.112693	0.00970156	0.0966963	0.1223	0.0870702	0.134231
HUN	0.121745	0.122216	0.010188	0.109196	0.134837	0.0930686	0.149133
SEN	0.0772839	0.0764262	0.00910609	0.0658583	0.089169	0.0585828	0.103577
LBY	0.0869872	0.0859681	0.00878911	0.0773115	0.0995773	0.0677277	0.109058
SDN	0.148323	0.150048	0.0201803	0.12638	0.174635	0.097853	0.193123
MYS	0.0817296	0.0809214	0.0091102	0.0700035	0.0936789	0.0612537	0.103198
SUR	0.106623	0.104783	0.0125086	0.0940243	0.12446	0.0800707	0.148959
BLZ	0.136129	0.137541	0.0144942	0.116729	0.153413	0.102473	0.167957
SVN	0.14573	0.145696	0.0128052	0.128407	0.161843	0.110772	0.176346
CZE	0.107028	0.106318	0.00998756	0.095891	0.12092	0.0823574	0.132518
IRN	0.121155	0.121076	0.0135889	0.104916	0.138809	0.0911744	0.164996
SLE	0.107433	0.106555	0.0144287	0.090966	0.12616	0.0758036	0.145633
JOR	0.115156	0.115324	0.0113786	0.100179	0.129128	0.0864407	0.140804
LTU	0.124886	0.124861	0.0109097	0.112084	0.138884	0.101489	0.157546
SWE	0.11007	0.109899	0.00833544	0.0994613	0.119442	0.0893017	0.134715
POL	0.130382	0.129538	0.0129346	0.113847	0.147334	0.105365	0.164883
TZA	0.091916	0.0924918	0.00989407	0.0786737	0.10257	0.0650292	0.122095
VEN	0.162211	0.160535	0.0221968	0.131387	0.191083	0.10815	0.2129
KEN	0.136086	0.135907	0.0123574	0.12132	0.152964	0.100886	0.16353
SVK	0.130063	0.13036	0.00975869	0.117964	0.141472	0.102954	0.157113
GBR	0.164313	0.16449	0.0147601	0.144601	0.181839	0.135643	0.204638
MAR	0.0958573	0.0961919	0.00925258	0.0847383	0.107843	0.0696653	0.115919
AGO	0.100436	0.100072	0.0119285	0.0852096	0.117918	0.074231	0.131222
KWT	0.0946265	0.0947766	0.00799455	0.0851313	0.105332	0.0782955	0.116258
UGA	0.0840356	0.0846419	0.0113463	0.0679186	0.0962251	0.0602504	0.118479
KHM	0.107987	0.107228	0.0106675	0.0942323	0.12254	0.079201	0.13344
COD	0.113348	0.113564	0.0107998	0.101495	0.126734	0.0863652	0.143628
QAT	0.0943775	0.0939218	0.00803164	0.0832853	0.104796	0.0744659	0.12298
BGD	0.114856	0.113848	0.0112644	0.10059	0.129727	0.0877064	0.140932
GRC	0.139268	0.138566	0.0117956	0.123461	0.155602	0.112361	0.171244
IND	0.0914647	0.0920099	0.00924201	0.0793065	0.103914	0.0706469	0.114181
MDA	0.12912	0.128017	0.0129352	0.113764	0.146588	0.100385	0.171972
GAB	0.124484	0.123988	0.0159847	0.10581	0.144015	0.0855274	0.185012
MWI	0.110447	0.109153	0.0143901	0.0927754	0.128347	0.0807355	0.153298
EGY	0.108318	0.107209	0.0133695	0.0926007	0.126865	0.0821702	0.139209
MNE	0.131211	0.13056	0.0128892	0.117249	0.149164	0.09821	0.157214
ZAF	0.0909609	0.0898493	0.00927328	0.0793466	0.104025	0.0693515	0.114817
MKD	0.12186	0.121075	0.0113449	0.10876	0.134612	0.0976493	0.153806
BHS	0.123343	0.122262	0.0115835	0.110047	0.139791	0.0978665	0.151802
ZWE	0.110041	0.108155	0.0130127	0.0946434	0.125825	0.0781735	0.14294
IRL	0.15232	0.151886	0.0127082	0.137183	0.168221	0.122641	0.185574
LKA	0.14078	0.13996	0.0168624	0.120307	0.165139	0.104484	0.182842
SRB	0.125564	0.125203	0.0120654	0.11146	0.142581	0.0952688	0.157727
COG	0.115819	0.115294	0.0138863	0.0972096	0.134854	0.0913779	0.156405
NZL	0.130721	0.130865	0.0122175	0.116423	0.146183	0.0994564	0.156994
LVA	0.129404	0.129614	0.0105121	0.115198	0.142237	0.104251	0.155272
AUS	0.133514	0.133056	0.0126156	0.1184	0.149797	0.101756	0.165186
FLK	0.117329	0.118486	0.0114634	0.101999	0.131157	0.0904524	0.150738
ISR	0.118233	0.118059	0.0111545	0.104596	0.132695	0.0953477	0.143003
COL	0.0884861	0.0880243	0.00941048	0.0764247	0.102028	0.0686315	0.112966
FIN	0.133693	0.13343	0.0109961	0.120093	0.14511	0.102639	0.160569
GMB	0.0877026	0.0866897	0.0093658	0.0772811	0.100164	0.0642306	0.108404
PRT	0.136583	0.13544	0.0110304	0.121963	0.151034	0.112392	0.158737
SAU	0.126302	0.126782	0.0113074	0.110523	0.139924	0.0938551	0.155176
PNG	0.113235	0.114167	0.0109699	0.0986132	0.127518	0.0856666	0.136429
JAM	0.117569	0.118478	0.0108865	0.1038	0.130777	0.0870678	0.146487
PAK	0.133353	0.133545	0.0153757	0.113322	0.152903	0.10319	0.16818
ZMB	0.108741	0.105163	0.015574	0.0909425	0.133469	0.077342	0.151134
CHN	0.0790954	0.0786762	0.00795548	0.0677409	0.0889151	0.0638667	0.106269
KAZ	0.100705	0.100428	0.00850019	0.0893369	0.1121	0.0832432	0.123594
ARM	0.109462	0.109839	0.0103433	0.0947996	0.121897	0.0863656	0.134677
LUX	0.151703	0.15153	0.0128402	0.134857	0.169242	0.121447	0.184117
ALB	0.12243	0.123074	0.011198	0.107758	0.13744	0.0978026	0.14515
HND	0.123331	0.123372	0.0118655	0.108042	0.138225	0.0968627	0.155927
NIC	0.0973128	0.0966145	0.0115168	0.0823112	0.111606	0.0718116	0.124792
NER	0.111639	0.111051	0.0142246	0.091891	0.130086	0.0780759	0.150962
ETH	0.124241	0.122455	0.0160328	0.107201	0.146715	0.0886314	0.166785
GRL	0.111541	0.11088	0.00929796	0.0993157	0.123425	0.0889181	0.137314
OMN	0.127397	0.126973	0.0120292	0.11284	0.143139	0.09645	0.154966
ESP	0.156872	0.156118	0.0127541	0.140482	0.173474	0.129894	0.188091
TJK	0.117135	0.115957	0.0117749	0.10349	0.134139	0.0862382	0.147925
YEM	0.150904	0.151417	0.0169989	0.130497	0.171753	0.107035	0.203738
THA	0.083158	0.0834759	0.0083514	0.0726259	0.0942332	0.0670173	0.108119
UZB	0.105855	0.106214	0.0075842	0.0954496	0.115301	0.0907974	0.129314
DZA	0.091272	0.0909634	0.00853476	0.0804698	0.10334	0.0674761	0.108641
FRA	0.164441	0.164033	0.0129392	0.1493	0.177996	0.1318	0.195365
CRI	0.121523	0.121062	0.0111737	0.106644	0.137719	0.1002	0.15288
AUT	0.128609	0.128892	0.0095277	0.114972	0.141798	0.10528	0.146977
GHA	0.114716	0.114913	0.0135187	0.0988611	0.133377	0.0833695	0.157339
MEX	0.0844991	0.0845145	0.00889192	0.0741812	0.0964921	0.0590472	0.104022
HTI	0.140287	0.140494	0.0159674	0.119787	0.160114	0.0983045	0.17567
JPN	0.182813	0.184197	0.01355	0.16404	0.197203	0.1534	0.222404
NPL	0.10935	0.10882	0.0100538	0.0964975	0.121538	0.085722	0.133909
BGR	0.130827	0.131093	0.0110378	0.115933	0.144338	0.104452	0.16011
DNK	0.161222	0.161994	0.0137334	0.142346	0.176799	0.128552	0.200869
MMR	0.134056	0.13318	0.014964	0.114643	0.150857	0.101133	0.180345
SWZ	0.0921697	0.092279	0.00939385	0.0801035	0.102791	0.0678964	0.11753
CYP	0.138124	0.138755	0.0104259	0.123855	0.150703	0.114332	0.164972
ROU	0.143447	0.143714	0.0123485	0.129611	0.157555	0.113613	0.171293
DOM	0.117153	0.118912	0.0104776	0.102523	0.127787	0.0919767	0.148842
BRA	0.0888486	0.088017	0.00895385	0.0776286	0.101235	0.072069	0.112667
ITA	0.123659	0.122743	0.0114246	0.106934	0.137783	0.098846	0.155471
SYR	0.16228	0.158787	0.0204714	0.135769	0.192487	0.119799	0.206402
CHL	0.0885881	0.0884106	0.0080105	0.0788448	0.098181	0.0684439	0.108439
BEL	0.151222	0.151133	0.0134187	0.134145	0.168066	0.114505	0.191602
EST	0.125525	0.125973	0.0106129	0.111585	0.138008	0.0952436	0.147703
LBN	0.165629	0.163761	0.0204254	0.138537	0.19312	0.121232	0.20875
GIN	0.108841	0.107074	0.0144706	0.0911684	0.128853	0.0744598	0.144975
BRN	0.102976	0.102495	0.00822391	0.0930519	0.114346	0.0830553	0.12312
MNG	0.118193	0.116275	0.011733	0.10455	0.131752	0.0952984	0.152734
PRY	0.0945016	0.0946641	0.00926967	0.081473	0.106591	0.0731227	0.115097
USA	0.119516	0.120658	0.0094913	0.107054	0.131961	0.0909545	0.138332
RWA	0.0911367	0.0909428	0.0103507	0.0772488	0.103971	0.0653509	0.116684
PRK	0.152022	0.151818	0.017216	0.131456	0.174115	0.108474	0.197484
NGA	0.102351	0.101403	0.0130568	0.0859724	0.119442	0.074387	0.132034
BWA	0.0792896	0.0787765	0.00688808	0.0708098	0.0887017	0.0649394	0.098466
NOR	0.148108	0.146901	0.0148677	0.129872	0.168183	0.115202	0.184869
BIH	0.135544	0.136243	0.0128127	0.117649	0.152149	0.108414	0.16521
BOL	0.133366	0.131896	0.016587	0.111971	0.155487	0.0987719	0.174635
AZE	0.110637	0.109748	0.0103247	0.0982501	0.122088	0.086843	0.136294
BLR	0.173158	0.174272	0.0244073	0.141113	0.20609	0.127004	0.226887
KOR	0.120058	0.119147	0.0125733	0.105501	0.134508	0.0927495	0.157879
RUS	0.108511	0.107528	0.0104102	0.0962998	0.123038	0.0804354	0.138075
PER	0.0856883	0.0850818	0.00825774	0.0755717	0.0947308	0.0664811	0.112649
VNM	0.102437	0.103129	0.00925308	0.0898662	0.11393	0.0753513	0.123921
PSE	0.177782	0.177772	0.0202883	0.15117	0.205168	0.131546	0.221692
TUN	0.119498	0.119776	0.0138766	0.102657	0.137096	0.0849687	0.152722
NLD	0.14511	0.14452	0.0138962	0.126462	0.163157	0.112911	0.177624
GTM	0.115655	0.11548	0.00960475	0.103441	0.126672	0.0909172	0.136355
URY	0.0876884	0.0866807	0.0089038	0.0774717	0.0977946	0.0680428	0.114309
HRV	0.134506	0.134421	0.0115695	0.119863	0.146786	0.107645	0.170913
IDN	0.102774	0.102348	0.0091672	0.0923119	0.114588	0.0756355	0.130237
LAO	0.131424	0.131476	0.0139194	0.11397	0.149266	0.0969811	0.179166
GUY	0.0885386	0.0884448	0.00833193	0.0763492	0.0989417	0.0719404	0.113463
SLB	0.119846	0.118253	0.0134751	0.10263	0.137606	0.0947927	0.15785
ISL	0.141861	0.140949	0.0130901	0.123669	0.156427	0.115328	0.193947
MOZ	0.109805	0.110609	0.0142191	0.0925726	0.128412	0.0748128	0.141459
MLI	0.110781	0.111529	0.0133652	0.0939446	0.12711	0.0794803	0.143764
PHL	0.092869	0.0926408	0.00821634	0.084171	0.102849	0.0703315	0.120521
CAN	0.138482	0.138831	0.0124241	0.123407	0.154875	0.108343	0.16993
CMR	0.102979	0.101341	0.0130983	0.0853629	0.119026	0.0737492	0.142468
FJI	0.122068	0.121774	0.0113742	0.109525	0.1347	0.0970814	0.163237
CIV	0.0863064	0.0860589	0.00900205	0.0740735	0.0974297	0.0649346	0.107971
TUR	0.141377	0.141693	0.0123937	0.124994	0.159899	0.112868	0.166588
LBR	0.109708	0.108914	0.0135243	0.0937657	0.128576	0.0795639	0.143774
BEN	0.0910437	0.0922612	0.0101131	0.075926	0.103191	0.0711581	0.117122

## Sheet: Stats_AE
	mean	median	std	p10	p90	min	max
CHE	0.168394	0.165131	0.0305848	0.130726	0.207596	0.0993598	0.257372
SLV	0.151056	0.150048	0.0233206	0.123239	0.181338	0.0983626	0.200289
ARG	0.173535	0.169258	0.0295998	0.138401	0.218433	0.116802	0.297544
PAN	0.136219	0.13306	0.0248273	0.107999	0.17248	0.0805201	0.19556
UKR	0.167594	0.160774	0.0279257	0.1361	0.205061	0.128835	0.248562
GEO	0.127932	0.126033	0.0214439	0.10359	0.155644	0.0753631	0.185581
CUB	0.177438	0.17488	0.0287884	0.140802	0.214214	0.115035	0.261195
ECU	0.166364	0.164465	0.0279376	0.13216	0.207698	0.116211	0.249978
DEU	0.141908	0.138712	0.0266796	0.11113	0.172983	0.0958057	0.233906
BFA	0.132897	0.132334	0.0230243	0.10592	0.163028	0.0862024	0.220966
MDG	0.118955	0.117788	0.0188953	0.0946941	0.138967	0.0814379	0.181926
KGZ	0.139665	0.138481	0.0219714	0.113579	0.163569	0.0913499	0.218765
IRQ	0.149661	0.14931	0.022011	0.121969	0.177528	0.0960242	0.215405
SOM	0.139882	0.137692	0.021548	0.113532	0.167628	0.0995609	0.201686
NAM	0.119232	0.118467	0.018255	0.0963606	0.14388	0.073984	0.178502
ARE	0.122513	0.120679	0.0235735	0.0926552	0.158111	0.0814301	0.193574
HUN	0.147236	0.145292	0.0211949	0.121521	0.176129	0.100141	0.200244
SEN	0.114887	0.115945	0.0173748	0.0939367	0.134579	0.0714848	0.167953
LBY	0.124414	0.123117	0.0216297	0.0981203	0.153599	0.0855759	0.193746
SDN	0.184853	0.183425	0.0358387	0.143141	0.232282	0.118246	0.305681
MYS	0.122089	0.119754	0.0250869	0.0948695	0.149712	0.0788342	0.248714
SUR	0.154026	0.152935	0.0250362	0.123275	0.189903	0.106368	0.215482
BLZ	0.161494	0.157728	0.028809	0.130294	0.20102	0.104735	0.250656
SVN	0.16304	0.162113	0.0290973	0.126588	0.2036	0.109441	0.24157
CZE	0.144135	0.139676	0.0270538	0.11345	0.180241	0.100969	0.242297
IRN	0.147431	0.144988	0.0267828	0.114763	0.187207	0.0969422	0.219023
SLE	0.140017	0.135834	0.0230825	0.112244	0.167701	0.0996742	0.212913
JOR	0.131553	0.12829	0.0232189	0.104426	0.161219	0.0870548	0.211585
LTU	0.142016	0.138441	0.022083	0.120788	0.172784	0.101331	0.207807
SWE	0.135518	0.131088	0.0237974	0.10926	0.166633	0.0853693	0.200656
POL	0.145421	0.143786	0.0272788	0.113402	0.180632	0.0944701	0.226426
TZA	0.121655	0.11589	0.0216462	0.101305	0.150746	0.075476	0.20994
VEN	0.206412	0.203024	0.0409373	0.159871	0.261902	0.126867	0.31414
KEN	0.128582	0.12836	0.0195848	0.101958	0.153246	0.0873276	0.180474
SVK	0.151865	0.146807	0.0260686	0.119532	0.186616	0.103922	0.225509
GBR	0.143326	0.140425	0.0251483	0.115285	0.178368	0.092652	0.20929
MAR	0.12567	0.124522	0.0224685	0.100221	0.155389	0.0814607	0.196605
AGO	0.127987	0.124606	0.0191194	0.107267	0.154478	0.0921119	0.181295
KWT	0.118709	0.113933	0.0226514	0.0966643	0.154425	0.0718235	0.172668
UGA	0.129139	0.126011	0.022373	0.105067	0.1646	0.0850009	0.201303
KHM	0.130084	0.129398	0.0220801	0.10122	0.151002	0.0859944	0.213707
COD	0.131211	0.131749	0.0188069	0.110519	0.155212	0.087146	0.188265
QAT	0.116332	0.113321	0.0220757	0.092287	0.14854	0.0747734	0.196159
BGD	0.136843	0.137833	0.0189416	0.111413	0.16083	0.0904515	0.180124
GRC	0.155831	0.154228	0.0255025	0.123945	0.189413	0.10717	0.225517
IND	0.153661	0.150215	0.0310271	0.119944	0.190042	0.0990068	0.262975
MDA	0.146369	0.14512	0.0258943	0.114059	0.174592	0.088436	0.250661
GAB	0.143178	0.139217	0.0218725	0.117608	0.177458	0.0982456	0.197561
MWI	0.138034	0.13294	0.0240464	0.110288	0.169159	0.0916394	0.223361
EGY	0.151468	0.150667	0.0264948	0.120295	0.18461	0.0997138	0.231598
MNE	0.174131	0.178365	0.026067	0.13729	0.206634	0.109576	0.241456
ZAF	0.113164	0.114748	0.0200022	0.0848178	0.135895	0.0688527	0.16462
MKD	0.166998	0.166792	0.0277389	0.133922	0.197704	0.11107	0.247999
BHS	0.136347	0.132193	0.0214241	0.112696	0.166003	0.0948347	0.201219
ZWE	0.138805	0.139248	0.0220233	0.109914	0.169006	0.0962619	0.198194
IRL	0.145122	0.140113	0.0271593	0.115403	0.183799	0.0984438	0.219888
LKA	0.163513	0.158795	0.0286387	0.130265	0.19736	0.108437	0.256238
SRB	0.167961	0.163857	0.0307743	0.131982	0.206577	0.117755	0.273686
COG	0.140549	0.137173	0.0227428	0.114377	0.172277	0.0992766	0.209743
NZL	0.130046	0.126323	0.0219734	0.101912	0.154651	0.0807903	0.194314
LVA	0.143433	0.140838	0.0234633	0.115994	0.17581	0.0907047	0.196862
AUS	0.127445	0.123189	0.0218221	0.10089	0.157481	0.0905515	0.191345
FLK	0.140783	0.139846	0.0263848	0.112332	0.175894	0.0904662	0.220516
ISR	0.128366	0.125092	0.0214964	0.104392	0.152811	0.0826084	0.224681
COL	0.12929	0.129751	0.0205019	0.104207	0.155613	0.0888608	0.177423
FIN	0.149776	0.144511	0.0256809	0.121685	0.186281	0.0981918	0.235352
GMB	0.116849	0.1132	0.016753	0.099458	0.141727	0.0817143	0.161906
PRT	0.142612	0.144982	0.0224692	0.1124	0.171915	0.10158	0.198938
SAU	0.131633	0.130512	0.0223072	0.104373	0.160403	0.0931532	0.197666
PNG	0.137016	0.134378	0.0237815	0.107527	0.173743	0.0931225	0.196747
JAM	0.142721	0.138312	0.0258883	0.111094	0.174079	0.0926726	0.226119
PAK	0.155764	0.156689	0.0244208	0.124759	0.184318	0.109339	0.242363
ZMB	0.137052	0.132679	0.0247696	0.107706	0.170465	0.0884012	0.209961
CHN	0.127783	0.122952	0.0232938	0.0998856	0.160432	0.0742831	0.197257
KAZ	0.127501	0.124848	0.021894	0.10113	0.151277	0.0845523	0.191112
ARM	0.130892	0.125598	0.0225661	0.104094	0.161828	0.0955533	0.194695
LUX	0.143954	0.143469	0.0240026	0.114899	0.177832	0.100357	0.218365
ALB	0.167551	0.162533	0.0282095	0.135312	0.203489	0.119631	0.248964
HND	0.152236	0.149825	0.025899	0.122431	0.187448	0.103529	0.236933
NIC	0.148328	0.14647	0.025529	0.119441	0.175866	0.0960752	0.229187
NER	0.135184	0.13035	0.0239065	0.109626	0.169011	0.0835682	0.210855
ETH	0.139555	0.139648	0.0222582	0.110638	0.17015	0.0888146	0.210331
GRL	0.154535	0.156185	0.0274069	0.118619	0.189071	0.0873561	0.221185
OMN	0.131922	0.128264	0.0240978	0.102884	0.160923	0.086835	0.206085
ESP	0.149339	0.151285	0.0254783	0.114461	0.17901	0.0870404	0.208491
TJK	0.144075	0.14223	0.0229556	0.119587	0.174205	0.100602	0.217214
YEM	0.168309	0.164657	0.0266666	0.13837	0.197163	0.126604	0.290642
THA	0.124953	0.123346	0.0231082	0.0978702	0.155524	0.0742968	0.193773
UZB	0.133782	0.132795	0.0197405	0.108703	0.158442	0.0939706	0.180412
DZA	0.124213	0.12326	0.0230556	0.092337	0.15494	0.0848082	0.188532
FRA	0.146645	0.146154	0.0224838	0.120583	0.180372	0.0940529	0.206035
CRI	0.145677	0.141284	0.0263528	0.113875	0.175727	0.0827099	0.224432
AUT	0.137304	0.133039	0.0254367	0.105402	0.17447	0.0879874	0.209967
GHA	0.136621	0.135795	0.0236232	0.108638	0.170514	0.0921417	0.203864
MEX	0.133065	0.130657	0.0225223	0.108416	0.163778	0.0845116	0.215988
HTI	0.169324	0.166327	0.0256126	0.138408	0.204555	0.12291	0.242078
JPN	0.193718	0.187229	0.0369578	0.156211	0.240573	0.129296	0.324558
NPL	0.133139	0.133446	0.0208511	0.107392	0.157861	0.0818606	0.175381
BGR	0.151555	0.146533	0.0281698	0.117578	0.192991	0.0960569	0.222202
DNK	0.136917	0.131014	0.0230312	0.111474	0.164906	0.102581	0.210301
MMR	0.152367	0.149535	0.0203692	0.129256	0.181305	0.106628	0.20714
SWZ	0.125459	0.121418	0.0227686	0.0997054	0.158254	0.0807875	0.180837
CYP	0.155106	0.157595	0.0277942	0.116408	0.189314	0.100738	0.226979
ROU	0.157857	0.15726	0.0247951	0.125214	0.190677	0.11076	0.223622
DOM	0.140398	0.137798	0.0246355	0.109097	0.175244	0.0943069	0.22421
BRA	0.131392	0.129722	0.0260722	0.097598	0.160453	0.0832818	0.218078
ITA	0.151858	0.151131	0.030723	0.116012	0.189475	0.0888352	0.261638
SYR	0.187928	0.188386	0.0318326	0.150643	0.229882	0.119339	0.279913
CHL	0.120193	0.118399	0.0212366	0.0942306	0.146847	0.0775727	0.177224
BEL	0.146646	0.143889	0.027523	0.111407	0.178354	0.0872325	0.228565
EST	0.141841	0.138809	0.0244348	0.112038	0.176128	0.0887049	0.19647
LBN	0.192775	0.188174	0.0304633	0.158992	0.232863	0.129015	0.279607
GIN	0.140732	0.136677	0.0242368	0.114327	0.172146	0.073015	0.206853
BRN	0.120633	0.115334	0.0259856	0.0939864	0.153075	0.0757536	0.215827
MNG	0.136065	0.135191	0.0238428	0.107491	0.167877	0.090853	0.207911
PRY	0.12666	0.125735	0.0221335	0.0994365	0.153627	0.0782146	0.192056
USA	0.138689	0.13744	0.025038	0.11033	0.169856	0.0947995	0.210936
RWA	0.127309	0.124373	0.0254437	0.0990079	0.162463	0.0872467	0.215865
PRK	0.164564	0.161693	0.0241289	0.135728	0.196837	0.116574	0.23245
NGA	0.128574	0.12872	0.0206811	0.102746	0.150917	0.0745367	0.189488
BWA	0.105089	0.103399	0.0158156	0.0857854	0.126701	0.0748541	0.150704
NOR	0.162635	0.160661	0.0284759	0.130212	0.195772	0.106044	0.264885
BIH	0.18801	0.181544	0.0394389	0.150115	0.226822	0.114186	0.433811
BOL	0.179136	0.173789	0.0303601	0.142206	0.220267	0.119517	0.253406
AZE	0.132572	0.128922	0.0256071	0.104107	0.171578	0.0807044	0.212207
BLR	0.198993	0.192143	0.035391	0.164046	0.240428	0.131188	0.334097
KOR	0.127807	0.127298	0.0219796	0.0993602	0.160575	0.0872744	0.188457
RUS	0.130449	0.130108	0.0204115	0.104717	0.152964	0.0891549	0.199272
PER	0.135651	0.134994	0.0217596	0.109155	0.165099	0.0958865	0.195155
VNM	0.128478	0.127604	0.0201358	0.105538	0.153897	0.0797495	0.195393
PSE	0.189311	0.182796	0.0339382	0.155403	0.241756	0.115776	0.302012
TUN	0.155254	0.151921	0.0267726	0.125128	0.193109	0.0988938	0.228939
NLD	0.137925	0.1343	0.0239431	0.112567	0.169421	0.0956128	0.213585
GTM	0.142989	0.14207	0.0212786	0.119377	0.164752	0.0929855	0.228336
URY	0.120819	0.118421	0.0220775	0.0932812	0.148848	0.0786918	0.179701
HRV	0.150191	0.14288	0.0278046	0.1226	0.182653	0.108357	0.273653
IDN	0.123256	0.119213	0.022332	0.0988979	0.151232	0.083966	0.216455
LAO	0.150622	0.146027	0.0291986	0.116188	0.190824	0.101763	0.230763
GUY	0.13488	0.135491	0.0237218	0.102046	0.164198	0.0803762	0.199581
SLB	0.144099	0.139458	0.0248924	0.115331	0.175217	0.0971274	0.2408
ISL	0.163577	0.160457	0.0285224	0.130814	0.200917	0.111321	0.253294
MOZ	0.139242	0.138082	0.0226285	0.1109	0.173779	0.0909464	0.193808
MLI	0.133127	0.130773	0.0219739	0.108096	0.159425	0.0909453	0.200663
PHL	0.122711	0.122296	0.0219232	0.093638	0.150532	0.0804758	0.191584
CAN	0.127872	0.128067	0.0190748	0.101484	0.148611	0.0873396	0.184535
CMR	0.132043	0.129019	0.0219916	0.106127	0.162077	0.0898358	0.193377
FJI	0.135502	0.136564	0.0222478	0.105797	0.165384	0.0929282	0.20395
CIV	0.118045	0.115446	0.0187966	0.0948488	0.14507	0.0841961	0.159818
TUR	0.179758	0.174306	0.0306329	0.142322	0.22681	0.117658	0.261493
LBR	0.139322	0.13803	0.0227924	0.115111	0.168124	0.0990834	0.210736
BEN	0.120125	0.119234	0.0199076	0.0972877	0.147518	0.0800062	0.169704

## Sheet: Stats_ATR_CCS
	mean	median	std	p10	p90	min	max
CHE	0.119283	0.117881	0.0179506	0.100012	0.143325	0.0836768	0.171559
SLV	0.0920286	0.0908625	0.0150598	0.0742767	0.111347	0.0639718	0.132459
ARG	0.10835	0.108262	0.0179436	0.0843364	0.132481	0.0714471	0.150657
PAN	0.080976	0.0804655	0.0118474	0.0666916	0.0973705	0.0508272	0.1166
UKR	0.112013	0.109378	0.0192307	0.0874317	0.137919	0.0815402	0.168193
GEO	0.067841	0.0662614	0.0113249	0.0542179	0.08492	0.0461001	0.0991756
CUB	0.112896	0.112987	0.0165761	0.0914604	0.131319	0.0710058	0.167161
ECU	0.108343	0.10696	0.0159305	0.090615	0.129906	0.0743204	0.15446
DEU	0.119906	0.116629	0.0187279	0.0983051	0.144545	0.0745825	0.171793
BFA	0.0861794	0.0850657	0.0145907	0.0686275	0.105414	0.0478612	0.129518
MDG	0.0759967	0.072365	0.0126463	0.0603135	0.0919361	0.0531883	0.115117
KGZ	0.0820067	0.0804669	0.0134176	0.0654417	0.097942	0.0509775	0.116456
IRQ	0.0975051	0.0974689	0.0165762	0.0785487	0.119532	0.0673699	0.154343
SOM	0.104369	0.100813	0.0169392	0.0864379	0.126017	0.0723818	0.163811
NAM	0.0845568	0.0829922	0.013395	0.0689817	0.0991848	0.0573547	0.152157
ARE	0.0790846	0.0780405	0.0118417	0.0654387	0.0956289	0.0507253	0.109442
HUN	0.10398	0.101844	0.0161108	0.0851374	0.128013	0.0704174	0.147849
SEN	0.0773335	0.0753246	0.0131878	0.0629285	0.0920328	0.0516757	0.119989
LBY	0.0727814	0.0729262	0.0105571	0.060359	0.087632	0.0502699	0.112386
SDN	0.122056	0.119782	0.0225993	0.0971671	0.151466	0.0793016	0.205655
MYS	0.0790284	0.0768322	0.0120171	0.0650663	0.0932624	0.0536695	0.11712
SUR	0.0895729	0.0901248	0.0143004	0.0718455	0.106724	0.0602412	0.127302
BLZ	0.0995357	0.0969949	0.0156045	0.080026	0.120757	0.069484	0.134719
SVN	0.113985	0.114431	0.0168686	0.0931089	0.133301	0.0833811	0.164348
CZE	0.098026	0.0944057	0.0170304	0.0795727	0.124982	0.0689806	0.173575
IRN	0.0871727	0.0859075	0.0127565	0.071747	0.106045	0.061114	0.122197
SLE	0.0902764	0.0881555	0.0149428	0.0728557	0.108381	0.0615997	0.130381
JOR	0.0817428	0.0807314	0.0129733	0.0667785	0.0981651	0.058216	0.118024
LTU	0.104528	0.105147	0.0153975	0.0837991	0.124817	0.0728366	0.16002
SWE	0.0911047	0.0890404	0.0168763	0.0717602	0.112024	0.0627817	0.137328
POL	0.11172	0.111099	0.0162545	0.0914817	0.1322	0.0764071	0.152147
TZA	0.0742949	0.0722855	0.0120742	0.0597196	0.0894757	0.0508349	0.112228
VEN	0.136366	0.134373	0.0241904	0.108489	0.168106	0.0887319	0.220242
KEN	0.0891127	0.0876448	0.0151721	0.0728172	0.108936	0.056535	0.141477
SVK	0.102943	0.100698	0.0176754	0.0848544	0.124196	0.0624687	0.157958
GBR	0.102317	0.0994608	0.0146167	0.0859451	0.123946	0.0779191	0.147318
MAR	0.0767267	0.0753853	0.0115058	0.0628911	0.0901854	0.0544037	0.11773
AGO	0.084757	0.0842316	0.0143656	0.0661217	0.102138	0.0506537	0.128848
KWT	0.0663369	0.0652512	0.0106538	0.0539948	0.0791594	0.0465957	0.101322
UGA	0.0799748	0.0789939	0.0132129	0.0648908	0.0952162	0.0534019	0.12908
KHM	0.0771329	0.0764076	0.014786	0.0624332	0.0958067	0.0474764	0.142133
COD	0.0824516	0.0813473	0.0133131	0.0670402	0.100794	0.0512897	0.1151
QAT	0.0654848	0.0653582	0.0104295	0.0516318	0.0789768	0.0424729	0.0932882
BGD	0.0832133	0.0820252	0.0139985	0.065561	0.102748	0.0548863	0.116489
GRC	0.11288	0.112208	0.0166425	0.0933125	0.130991	0.0817925	0.161639
IND	0.0730516	0.0710314	0.0123279	0.0582675	0.0918109	0.0521611	0.10436
MDA	0.091931	0.0922545	0.0138206	0.0748518	0.110176	0.0658643	0.134216
GAB	0.0940289	0.0920408	0.0163937	0.0754431	0.112007	0.0555737	0.159594
MWI	0.0896277	0.087829	0.0161901	0.0697279	0.10863	0.0545051	0.153195
EGY	0.0969052	0.0945629	0.0166625	0.0787405	0.118461	0.0694414	0.153409
MNE	0.0962217	0.0947733	0.0128575	0.080583	0.112881	0.0651034	0.131579
ZAF	0.0757558	0.0753738	0.011409	0.0610383	0.0870279	0.0502388	0.109999
MKD	0.0860525	0.0843006	0.0120699	0.0710625	0.105203	0.0663132	0.135755
BHS	0.0891293	0.0876882	0.0134474	0.0728949	0.106244	0.0628527	0.131285
ZWE	0.0941337	0.09176	0.017678	0.0756619	0.114952	0.0543907	0.158174
IRL	0.115494	0.113097	0.0184175	0.0927789	0.139671	0.0808763	0.169978
LKA	0.102298	0.101276	0.0181515	0.0802184	0.123924	0.0668545	0.181202
SRB	0.0912947	0.0902934	0.0136807	0.0762582	0.110772	0.0611935	0.131229
COG	0.0941853	0.0917321	0.015639	0.0771906	0.113914	0.070753	0.147291
NZL	0.0981023	0.0977589	0.0134158	0.0810211	0.115073	0.0699693	0.141832
LVA	0.101223	0.100002	0.0145059	0.0843891	0.12113	0.0678237	0.141568
AUS	0.100718	0.0980917	0.0140794	0.0859772	0.121533	0.0713451	0.139045
FLK	0.0839993	0.0805458	0.0134815	0.0696843	0.10303	0.0564128	0.128318
ISR	0.0885036	0.0869213	0.0129823	0.0736661	0.103607	0.0554305	0.123833
COL	0.0759065	0.0751962	0.0102478	0.0620064	0.0897352	0.0549298	0.102024
FIN	0.107569	0.104191	0.0183839	0.0878028	0.131413	0.074376	0.192231
GMB	0.0725327	0.0712404	0.0116938	0.0602527	0.0864828	0.0512014	0.133636
PRT	0.109035	0.107314	0.0177565	0.0868511	0.135515	0.076202	0.168457
SAU	0.0936461	0.0916319	0.0147342	0.0774381	0.11391	0.0667073	0.13338
PNG	0.0785997	0.079177	0.0117727	0.0638844	0.0938432	0.0544726	0.110091
JAM	0.0856171	0.0851277	0.0138568	0.0700449	0.102865	0.0582531	0.132936
PAK	0.097882	0.0949324	0.0171946	0.078869	0.118389	0.0707627	0.153249
ZMB	0.0908303	0.0869079	0.0149564	0.0738341	0.111537	0.0556656	0.129937
CHN	0.0866285	0.0848259	0.0135243	0.0718542	0.102891	0.0606424	0.141331
KAZ	0.0729321	0.072141	0.0111174	0.0588779	0.0881645	0.0419659	0.097502
ARM	0.0786595	0.0784474	0.0126999	0.0644113	0.091194	0.0495005	0.134362
LUX	0.120269	0.118317	0.0188506	0.0994217	0.140259	0.0802714	0.20831
ALB	0.0851715	0.0853065	0.0122025	0.0696408	0.0972568	0.0614687	0.133623
HND	0.0883368	0.0875704	0.0129146	0.0734858	0.105079	0.0602266	0.122692
NIC	0.0864488	0.0850324	0.013452	0.0701835	0.106342	0.0634435	0.122307
NER	0.0949413	0.0941142	0.0150794	0.0771071	0.113336	0.0593198	0.151451
ETH	0.104582	0.101802	0.0178174	0.0820966	0.131023	0.0732025	0.160083
GRL	0.0780138	0.0749892	0.0134458	0.0648087	0.0953557	0.0502578	0.123589
OMN	0.0939057	0.093714	0.0123312	0.0813657	0.110838	0.0691189	0.126927
ESP	0.116548	0.11497	0.0207757	0.0931256	0.142479	0.0811364	0.190598
TJK	0.0815091	0.0814669	0.014384	0.0649072	0.0973623	0.0547943	0.123386
YEM	0.110171	0.108687	0.0163601	0.0915498	0.131047	0.0734295	0.163683
THA	0.075774	0.0747936	0.0132824	0.0614598	0.0943053	0.0509389	0.121083
UZB	0.0746766	0.0737925	0.0115011	0.0611855	0.09011	0.048244	0.102582
DZA	0.0738395	0.0724328	0.0129436	0.0585649	0.0858322	0.0531648	0.11548
FRA	0.11796	0.113965	0.020185	0.0955604	0.147999	0.0806715	0.179443
CRI	0.0884212	0.0865063	0.0141098	0.0727896	0.105499	0.0596178	0.138914
AUT	0.0904762	0.0891987	0.0158969	0.0719593	0.110386	0.0611008	0.141687
GHA	0.0894273	0.0888411	0.0148819	0.0729247	0.108818	0.0502475	0.126206
MEX	0.0732141	0.0710199	0.0121041	0.0580672	0.0870106	0.0495197	0.117612
HTI	0.105234	0.102053	0.0195161	0.082069	0.131717	0.0642667	0.162404
JPN	0.112779	0.111659	0.0152879	0.0929627	0.133096	0.0763947	0.150799
NPL	0.0779217	0.0743057	0.0129999	0.0660337	0.0960471	0.0532943	0.12366
BGR	0.103106	0.102586	0.0164583	0.0839911	0.123503	0.0654139	0.159657
DNK	0.111187	0.107013	0.0170946	0.0934259	0.133172	0.0744	0.164545
MMR	0.0960073	0.0937395	0.0152567	0.0769862	0.117775	0.0692859	0.138105
SWZ	0.0751602	0.0734161	0.013703	0.0582251	0.0942404	0.0514046	0.11735
CYP	0.109049	0.107291	0.019618	0.0863085	0.142392	0.0756148	0.157361
ROU	0.112413	0.11001	0.0186161	0.0907507	0.136786	0.0785641	0.165647
DOM	0.0839004	0.0824816	0.0133069	0.0686339	0.101917	0.062075	0.1268
BRA	0.0763839	0.074441	0.0129313	0.0610731	0.0949927	0.0497388	0.11195
ITA	0.10698	0.104088	0.0173014	0.0887966	0.130552	0.0532283	0.155662
SYR	0.121534	0.120206	0.0173172	0.100973	0.142293	0.0831953	0.175048
CHL	0.0775128	0.0769716	0.0106724	0.0658442	0.0917286	0.0475725	0.108257
BEL	0.120093	0.118525	0.0168787	0.100678	0.141938	0.0839929	0.17215
EST	0.09773	0.0945838	0.0164995	0.0809659	0.120745	0.0692774	0.150895
LBN	0.128237	0.125925	0.0235968	0.101784	0.158941	0.0828509	0.205358
GIN	0.0910671	0.0900549	0.0156092	0.0699423	0.113209	0.0618374	0.135699
BRN	0.0736927	0.0727231	0.0116194	0.0608399	0.0877	0.0507789	0.116624
MNG	0.085657	0.0825711	0.0154297	0.0694644	0.104716	0.0585988	0.15291
PRY	0.0799322	0.0791609	0.0116817	0.0649969	0.0943463	0.0524276	0.115471
USA	0.0742097	0.0720216	0.0103293	0.0613542	0.0877783	0.0516506	0.101951
RWA	0.0762434	0.073499	0.012604	0.061547	0.0947938	0.0471833	0.111037
PRK	0.112194	0.113294	0.016317	0.0914665	0.132668	0.082015	0.150302
NGA	0.0867254	0.0844303	0.0164321	0.0672372	0.106875	0.0569463	0.142254
BWA	0.0670241	0.065027	0.0112677	0.0532383	0.0840458	0.0472818	0.103392
NOR	0.114705	0.113146	0.0161322	0.0948116	0.139873	0.0814817	0.155378
BIH	0.0974206	0.0959654	0.0145247	0.0799241	0.117095	0.0675695	0.140981
BOL	0.11173	0.109432	0.0196462	0.088452	0.135295	0.0737394	0.182987
AZE	0.0800287	0.0791647	0.0126239	0.0649683	0.0980955	0.0557103	0.122436
BLR	0.134187	0.1306	0.0261445	0.105648	0.171275	0.0857419	0.199741
KOR	0.0949144	0.0935033	0.0132609	0.0793403	0.113485	0.0652337	0.135471
RUS	0.0569324	0.0563533	0.0087252	0.0475117	0.0692005	0.0403824	0.090185
PER	0.0735257	0.0697913	0.0138864	0.0596631	0.09117	0.0413298	0.117746
VNM	0.078922	0.0773	0.0115159	0.0662236	0.0917636	0.0556996	0.116627
PSE	0.134365	0.131836	0.0242596	0.108671	0.166089	0.07674	0.2101
TUN	0.0983173	0.0958108	0.0175042	0.0782765	0.124066	0.06352	0.139864
NLD	0.119081	0.119025	0.0165682	0.0998595	0.136309	0.0825106	0.179846
GTM	0.0833084	0.0813637	0.0128578	0.0678057	0.100166	0.0547892	0.124412
URY	0.0751205	0.0737101	0.0114156	0.0615436	0.0910527	0.0527898	0.104568
HRV	0.102399	0.101775	0.017446	0.0816525	0.123098	0.0612699	0.165353
IDN	0.0808479	0.0771612	0.0135694	0.065336	0.100251	0.0565907	0.130565
LAO	0.0981467	0.097017	0.017656	0.0750104	0.12149	0.0581432	0.144152
GUY	0.074868	0.0744515	0.0106691	0.0621732	0.0858921	0.057881	0.125496
SLB	0.08782	0.0868887	0.0165966	0.0671949	0.112397	0.0572618	0.141773
ISL	0.104019	0.102871	0.0147656	0.0880824	0.12312	0.0639968	0.139695
MOZ	0.0938891	0.0920447	0.0157648	0.0745575	0.117445	0.0636811	0.132105
MLI	0.0920009	0.0899133	0.016306	0.0725276	0.110298	0.0619518	0.159727
PHL	0.070129	0.0696844	0.00933488	0.0586639	0.0824721	0.0494247	0.0938191
CAN	0.0963335	0.0947474	0.0148335	0.0803641	0.113991	0.0689893	0.146839
CMR	0.0867243	0.0855038	0.0146221	0.068065	0.106052	0.0613494	0.1368
FJI	0.0916535	0.0909907	0.0129411	0.0739015	0.106502	0.0609933	0.126984
CIV	0.0718098	0.0704595	0.0122918	0.0587496	0.0866718	0.0496259	0.122128
TUR	0.106553	0.103889	0.0172181	0.0872491	0.127111	0.0746987	0.160062
LBR	0.092484	0.0903181	0.0177455	0.0702153	0.115556	0.0607665	0.148356
BEN	0.0761969	0.0740543	0.0129957	0.0615804	0.092819	0.0462639	0.117424

## Sheet: Stats_B_PYR_kerosene
	mean	median	std	p10	p90	min	max
CHE	0.339683	0.329704	0.0563675	0.270316	0.417581	0.248191	0.500469
SLV	0.28606	0.282397	0.05018	0.228547	0.351298	0.199897	0.438263
ARG	0.31738	0.312608	0.0486764	0.259236	0.385627	0.239068	0.478433
PAN	0.24073	0.237787	0.0320308	0.198917	0.280147	0.18032	0.321856
UKR	0.348852	0.345259	0.0465242	0.292383	0.410653	0.260159	0.489131
GEO	0.215824	0.210164	0.0329655	0.180737	0.262894	0.163541	0.332514
CUB	0.350408	0.345228	0.0490305	0.293521	0.416732	0.256978	0.501576
ECU	0.313921	0.306535	0.0437576	0.262275	0.381826	0.225853	0.428133
DEU	0.295463	0.292105	0.0390177	0.250676	0.346197	0.208322	0.414339
BFA	0.248086	0.240414	0.0414771	0.202335	0.299766	0.18273	0.431633
MDG	0.217496	0.21741	0.0309631	0.180757	0.253977	0.157541	0.345143
KGZ	0.254455	0.253255	0.0352731	0.210967	0.302488	0.181042	0.341983
IRQ	0.289617	0.286602	0.0445039	0.231659	0.349337	0.200468	0.412937
SOM	0.29487	0.297387	0.0486873	0.230595	0.358186	0.209431	0.482104
NAM	0.226301	0.223923	0.0308295	0.18844	0.272307	0.174126	0.302427
ARE	0.224913	0.221994	0.0267174	0.19346	0.259489	0.164669	0.307781
HUN	0.260069	0.25627	0.037528	0.219341	0.302515	0.193791	0.432421
SEN	0.202114	0.200204	0.030276	0.163526	0.238501	0.135849	0.313976
LBY	0.201188	0.200207	0.0303399	0.165626	0.238216	0.147504	0.303617
SDN	0.364226	0.36213	0.0629699	0.286984	0.445325	0.23057	0.527804
MYS	0.207278	0.203093	0.029158	0.172289	0.247182	0.167529	0.33567
SUR	0.267622	0.265381	0.0470081	0.21788	0.318691	0.197501	0.502377
BLZ	0.304816	0.306497	0.0391065	0.259111	0.347293	0.198539	0.429436
SVN	0.293891	0.289084	0.0376956	0.255422	0.341632	0.207241	0.430354
CZE	0.231743	0.231761	0.0325495	0.188822	0.273341	0.160248	0.32796
IRN	0.265996	0.266274	0.0369456	0.219055	0.312456	0.189577	0.386777
SLE	0.255897	0.251334	0.0382511	0.21477	0.305416	0.186244	0.399766
JOR	0.243074	0.23781	0.0319628	0.206758	0.283734	0.169894	0.327492
LTU	0.261783	0.259653	0.0342245	0.217975	0.304696	0.193744	0.36564
SWE	0.226106	0.220946	0.0286257	0.192085	0.264854	0.169305	0.319777
POL	0.276954	0.273505	0.0415176	0.230204	0.336359	0.196562	0.388179
TZA	0.214674	0.211659	0.0305814	0.178534	0.258508	0.158732	0.293929
VEN	0.404638	0.397925	0.060347	0.331849	0.480519	0.277915	0.579033
KEN	0.283395	0.278941	0.038108	0.237573	0.337083	0.215445	0.394129
SVK	0.262591	0.255965	0.0325971	0.229187	0.299445	0.185495	0.372844
GBR	0.322345	0.320735	0.0461457	0.26895	0.373604	0.231895	0.467974
MAR	0.214846	0.211424	0.0291415	0.181139	0.258834	0.143652	0.295753
AGO	0.238745	0.235362	0.036168	0.197798	0.282716	0.158984	0.35713
KWT	0.197699	0.19803	0.0256733	0.16546	0.228128	0.148968	0.269568
UGA	0.224761	0.21784	0.0380346	0.180659	0.271556	0.155212	0.343175
KHM	0.242132	0.238178	0.0377164	0.198195	0.29123	0.163831	0.359682
COD	0.250179	0.249123	0.0307202	0.209838	0.284836	0.18471	0.325178
QAT	0.19529	0.194689	0.0232304	0.169218	0.229475	0.155447	0.265535
BGD	0.249702	0.24664	0.0350721	0.208563	0.290814	0.178415	0.349916
GRC	0.288201	0.283284	0.0404205	0.241934	0.340137	0.200228	0.403374
IND	0.218658	0.217397	0.0318395	0.181438	0.256476	0.14308	0.311291
MDA	0.287179	0.284891	0.0427026	0.236618	0.337687	0.205978	0.427174
GAB	0.284586	0.278992	0.0442452	0.233609	0.344031	0.201315	0.40986
MWI	0.268711	0.255266	0.0452974	0.219736	0.327304	0.180925	0.434635
EGY	0.274449	0.269563	0.0350162	0.238124	0.327279	0.190187	0.366164
MNE	0.295893	0.292032	0.0442277	0.242773	0.350067	0.221077	0.451799
ZAF	0.204643	0.203838	0.0308654	0.165487	0.243149	0.146291	0.294591
MKD	0.269621	0.270323	0.0348582	0.224155	0.313551	0.206246	0.359214
BHS	0.268631	0.264186	0.0403388	0.216014	0.321166	0.183263	0.367793
ZWE	0.274047	0.271299	0.0386996	0.222063	0.327187	0.191736	0.387551
IRL	0.293476	0.290501	0.0392144	0.243384	0.351979	0.219411	0.391502
LKA	0.322776	0.316307	0.045924	0.272068	0.390546	0.238365	0.47554
SRB	0.275441	0.276714	0.0406258	0.231026	0.317147	0.175958	0.402433
COG	0.272594	0.265349	0.0396884	0.229137	0.329068	0.186296	0.401016
NZL	0.267353	0.26608	0.0427816	0.212661	0.312101	0.175015	0.390403
LVA	0.255151	0.251176	0.0316828	0.218392	0.301575	0.19437	0.357081
AUS	0.268345	0.263313	0.0359607	0.228497	0.315853	0.198171	0.386488
FLK	0.247308	0.244149	0.034992	0.205375	0.297708	0.188828	0.341991
ISR	0.251589	0.246191	0.0308745	0.215095	0.292435	0.199371	0.336233
COL	0.210268	0.206819	0.0324434	0.17347	0.247219	0.132515	0.325723
FIN	0.280102	0.268933	0.0437824	0.230375	0.33468	0.214313	0.459441
GMB	0.20785	0.207907	0.0304465	0.168961	0.245495	0.14204	0.301647
PRT	0.268844	0.26216	0.0324956	0.232916	0.315083	0.19249	0.356008
SAU	0.254101	0.251774	0.0308446	0.215092	0.289535	0.199433	0.377208
PNG	0.252246	0.252484	0.0349613	0.208838	0.296851	0.173985	0.350594
JAM	0.255909	0.256591	0.0357729	0.210949	0.298398	0.180333	0.362927
PAK	0.303908	0.301295	0.0431994	0.249036	0.364146	0.197817	0.406185
ZMB	0.259403	0.253526	0.0376808	0.216262	0.302259	0.186438	0.364904
CHN	0.191626	0.190373	0.02567	0.159595	0.226562	0.139348	0.27592
KAZ	0.214276	0.211453	0.0260291	0.185894	0.249107	0.156504	0.307654
ARM	0.232539	0.228126	0.0340584	0.191157	0.279004	0.154722	0.318867
LUX	0.305122	0.304403	0.0356354	0.264664	0.347755	0.241927	0.439053
ALB	0.272676	0.264724	0.0417544	0.223306	0.323934	0.19678	0.44023
HND	0.266799	0.265491	0.0369145	0.216358	0.317878	0.202026	0.350075
NIC	0.24124	0.23914	0.0343324	0.196739	0.284593	0.161597	0.361997
NER	0.274765	0.266116	0.0419601	0.22639	0.334157	0.183176	0.391236
ETH	0.291484	0.285471	0.040648	0.248062	0.344326	0.219564	0.410098
GRL	0.242032	0.237574	0.0332052	0.200735	0.289809	0.172382	0.334417
OMN	0.261297	0.257658	0.0328316	0.225332	0.305752	0.204738	0.379852
ESP	0.300275	0.299669	0.0353997	0.259683	0.343776	0.229996	0.414277
TJK	0.2602	0.26056	0.0370212	0.217433	0.302892	0.162748	0.448671
YEM	0.348613	0.344042	0.043951	0.302097	0.396397	0.236666	0.49394
THA	0.195083	0.196048	0.0280331	0.15945	0.228622	0.143858	0.280753
UZB	0.223045	0.217816	0.0296869	0.187725	0.26292	0.169267	0.310201
DZA	0.214651	0.216509	0.0256012	0.185137	0.249472	0.145126	0.276252
FRA	0.307988	0.301935	0.0429187	0.259445	0.366867	0.22899	0.451666
CRI	0.264553	0.265138	0.0351771	0.22193	0.31253	0.170027	0.37358
AUT	0.245008	0.240517	0.0311518	0.206967	0.287267	0.177456	0.353516
GHA	0.269237	0.269299	0.0486401	0.211812	0.327623	0.182816	0.436094
MEX	0.197417	0.194634	0.030489	0.162519	0.235032	0.147342	0.305303
HTI	0.327749	0.332637	0.0458128	0.264309	0.386719	0.221792	0.423275
JPN	0.344869	0.343994	0.0388741	0.292665	0.404576	0.255118	0.430614
NPL	0.235602	0.23143	0.0329171	0.196194	0.27915	0.167812	0.342877
BGR	0.266853	0.264333	0.0342742	0.230915	0.310059	0.188869	0.401158
DNK	0.294931	0.293301	0.0349202	0.250318	0.338733	0.223492	0.387484
MMR	0.30723	0.301402	0.0479784	0.251364	0.375257	0.216487	0.444016
SWZ	0.211559	0.210141	0.0333348	0.171595	0.263227	0.145903	0.302223
CYP	0.281616	0.27391	0.035754	0.242132	0.330358	0.211797	0.388569
ROU	0.298875	0.295158	0.0425531	0.252346	0.353775	0.223703	0.475655
DOM	0.254744	0.249161	0.0364511	0.209328	0.305391	0.187618	0.367068
BRA	0.211747	0.207046	0.0322257	0.175347	0.250125	0.159293	0.336536
ITA	0.263318	0.255651	0.0332722	0.226777	0.312727	0.197425	0.369778
SYR	0.380376	0.377028	0.0540835	0.315817	0.450771	0.252963	0.54221
CHL	0.199392	0.198774	0.0284531	0.164789	0.237665	0.134201	0.285147
BEL	0.298764	0.29828	0.0373218	0.254687	0.347755	0.222936	0.398918
EST	0.248366	0.250473	0.0291224	0.206343	0.286275	0.197463	0.315199
LBN	0.402791	0.394461	0.0657987	0.319287	0.475385	0.291503	0.629913
GIN	0.261765	0.255295	0.0403377	0.215189	0.303866	0.175053	0.45727
BRN	0.214416	0.211194	0.0278169	0.182381	0.247325	0.164499	0.326578
MNG	0.256563	0.25539	0.0371041	0.216785	0.303932	0.181593	0.389683
PRY	0.2222	0.218475	0.0329252	0.183947	0.26443	0.150838	0.334046
USA	0.242826	0.24233	0.0335403	0.203464	0.286185	0.182235	0.338371
RWA	0.21654	0.213871	0.0347219	0.17706	0.265459	0.141977	0.33052
PRK	0.346551	0.34148	0.0548249	0.272583	0.421405	0.240492	0.52465
NGA	0.246121	0.246513	0.0330492	0.204228	0.286887	0.17434	0.340669
BWA	0.178361	0.174896	0.0269473	0.149861	0.2177	0.130674	0.264441
NOR	0.313316	0.313717	0.0453034	0.257664	0.362771	0.223477	0.488731
BIH	0.310705	0.307883	0.0403955	0.268039	0.362181	0.215618	0.453199
BOL	0.319	0.314583	0.0483144	0.263699	0.388724	0.220751	0.464777
AZE	0.235297	0.23178	0.0286408	0.205003	0.267434	0.184604	0.344399
BLR	0.418605	0.409202	0.0642065	0.347011	0.5159	0.290887	0.62706
KOR	0.248576	0.246832	0.0315949	0.212291	0.287516	0.169534	0.344176
RUS	0.228317	0.227798	0.030161	0.190583	0.266066	0.1577	0.308341
PER	0.203198	0.201285	0.0295969	0.168449	0.242831	0.139164	0.295899
VNM	0.2289	0.225802	0.0359386	0.181786	0.282308	0.168276	0.30598
PSE	0.422623	0.422012	0.0643504	0.339537	0.507707	0.310311	0.626854
TUN	0.288646	0.284827	0.045223	0.236943	0.349467	0.18926	0.445984
NLD	0.288318	0.286166	0.0431131	0.237987	0.339146	0.221629	0.477334
GTM	0.244605	0.240555	0.0310306	0.206483	0.282583	0.178126	0.338294
URY	0.199544	0.198168	0.025517	0.168295	0.232917	0.150201	0.269698
HRV	0.267152	0.264218	0.0388493	0.220217	0.322825	0.201164	0.377528
IDN	0.220784	0.221466	0.0301393	0.182475	0.260766	0.149981	0.314946
LAO	0.304737	0.299186	0.050854	0.243925	0.364436	0.199143	0.461147
GUY	0.21057	0.207559	0.0344171	0.169807	0.256532	0.123271	0.306343
SLB	0.273233	0.270252	0.0392837	0.228294	0.32615	0.187219	0.377346
ISL	0.296408	0.293694	0.0409609	0.246331	0.348738	0.228633	0.40693
MOZ	0.260252	0.254567	0.0392199	0.220979	0.312107	0.185305	0.40684
MLI	0.26126	0.258809	0.0444955	0.211602	0.310644	0.159149	0.422527
PHL	0.20341	0.203953	0.0319962	0.162516	0.243246	0.136128	0.282018
CAN	0.271834	0.271033	0.032725	0.230003	0.31518	0.195354	0.369666
CMR	0.2517	0.237592	0.0398673	0.208469	0.302965	0.171535	0.363461
FJI	0.261525	0.253962	0.0372798	0.21599	0.314199	0.19895	0.37106
CIV	0.197478	0.197748	0.0297712	0.158367	0.236672	0.13691	0.292735
TUR	0.316116	0.314228	0.0491987	0.254147	0.382063	0.234312	0.493151
LBR	0.264689	0.266654	0.0396797	0.212974	0.315174	0.181247	0.378001
BEN	0.214206	0.213804	0.030951	0.175198	0.25215	0.132474	0.309737

## Sheet: Stats_CLR
	mean	median	std	p10	p90	min	max
CHE	0.10999	0.108375	0.0169786	0.0909766	0.128361	0.0761849	0.172265
SLV	0.0922635	0.0921325	0.0117573	0.0767049	0.10742	0.0693732	0.128759
ARG	0.109155	0.107412	0.0165647	0.0871328	0.130622	0.0769934	0.145595
PAN	0.0811181	0.0787349	0.0137071	0.0665426	0.100577	0.0585303	0.123451
UKR	0.112899	0.108814	0.0192367	0.0914715	0.138024	0.0709438	0.182507
GEO	0.0676059	0.0656178	0.00953208	0.0577361	0.0811778	0.050806	0.0982646
CUB	0.111898	0.106104	0.0191873	0.09097	0.141501	0.0821469	0.178415
ECU	0.104104	0.102071	0.0136797	0.0871831	0.121298	0.0780434	0.148606
DEU	0.11513	0.113044	0.0183322	0.0949033	0.136172	0.0683693	0.178291
BFA	0.0872641	0.0874387	0.0148821	0.0698767	0.109088	0.0554381	0.141224
MDG	0.0783698	0.0782486	0.0118697	0.0636869	0.0935972	0.0570456	0.12427
KGZ	0.0828494	0.0809563	0.0129165	0.0681304	0.100777	0.0511077	0.121997
IRQ	0.0959134	0.094057	0.0145385	0.0808269	0.115861	0.0673498	0.140867
SOM	0.103998	0.101737	0.0179908	0.0817275	0.128028	0.0678747	0.149539
NAM	0.0842175	0.083369	0.0141319	0.0688322	0.10056	0.0576387	0.147678
ARE	0.0767528	0.0744347	0.012582	0.062728	0.0941366	0.0536091	0.113301
HUN	0.103417	0.103182	0.0172138	0.0811245	0.126307	0.0719566	0.151552
SEN	0.0750793	0.0744657	0.0122515	0.0589259	0.092646	0.0483249	0.117449
LBY	0.0712316	0.0711554	0.0103577	0.0581653	0.0827346	0.048417	0.0987352
SDN	0.123821	0.119619	0.0226792	0.0981864	0.154096	0.0762194	0.199174
MYS	0.0763134	0.0763672	0.0117608	0.0612256	0.0899996	0.0531069	0.114991
SUR	0.087421	0.0863747	0.0152775	0.0699404	0.108659	0.0596768	0.131136
BLZ	0.099966	0.0981641	0.0173298	0.0779657	0.125464	0.0639523	0.141013
SVN	0.113346	0.111519	0.0203458	0.0906695	0.140869	0.0749593	0.201427
CZE	0.098028	0.0949787	0.0180549	0.0779585	0.120087	0.0698504	0.175167
IRN	0.0887451	0.088665	0.0141413	0.0732555	0.106133	0.056161	0.138114
SLE	0.0904004	0.0903233	0.0150709	0.0704768	0.109884	0.0523778	0.131643
JOR	0.08153	0.0819601	0.0126599	0.0641065	0.0956697	0.0510056	0.114716
LTU	0.104365	0.102635	0.0171834	0.0855642	0.12964	0.0644853	0.152341
SWE	0.0914346	0.0917273	0.0165713	0.0707687	0.116962	0.0616851	0.137986
POL	0.10738	0.105647	0.0157384	0.0880991	0.127571	0.0786166	0.156138
TZA	0.0756109	0.0728122	0.0126642	0.0620249	0.092736	0.0499338	0.115146
VEN	0.135839	0.134057	0.0208981	0.109433	0.165691	0.0749044	0.182632
KEN	0.0883545	0.08729	0.0148022	0.070383	0.105569	0.0508623	0.139313
SVK	0.102439	0.100447	0.0171161	0.0815077	0.125011	0.0647914	0.147146
GBR	0.0961072	0.0962439	0.0134319	0.0799131	0.115505	0.0614406	0.130904
MAR	0.0751712	0.0749321	0.0101231	0.0634861	0.0881773	0.0486653	0.103478
AGO	0.0848202	0.0826139	0.0146909	0.0676713	0.106305	0.0565068	0.126529
KWT	0.0681914	0.0667467	0.0112712	0.0557459	0.0811165	0.0463877	0.106582
UGA	0.0821733	0.080553	0.0123567	0.0672885	0.0995387	0.0564466	0.114276
KHM	0.0782865	0.075718	0.0141542	0.0622788	0.0981156	0.0536907	0.117143
COD	0.083541	0.0821936	0.0137417	0.0684654	0.0998024	0.0538386	0.125759
QAT	0.0671495	0.0664563	0.0105666	0.0545108	0.0794218	0.0406129	0.097993
BGD	0.0820591	0.0825864	0.0135628	0.0639167	0.100849	0.0555839	0.11516
GRC	0.108813	0.10639	0.0172375	0.0913893	0.13205	0.0728549	0.164391
IND	0.0726657	0.0717913	0.0118892	0.0595902	0.0861181	0.049419	0.123401
MDA	0.0956454	0.0965369	0.0137352	0.0788798	0.112196	0.0669709	0.135966
GAB	0.096986	0.096521	0.0157311	0.0794585	0.114791	0.058361	0.142888
MWI	0.0903997	0.0881861	0.0149935	0.0749109	0.108373	0.0607311	0.138858
EGY	0.0956104	0.0945781	0.0150461	0.0772612	0.114989	0.0656157	0.143634
MNE	0.091484	0.0894496	0.0128682	0.0779137	0.108859	0.0646357	0.137525
ZAF	0.0761645	0.0749236	0.0125667	0.0627172	0.0883458	0.0442966	0.120676
MKD	0.0845468	0.0834379	0.0127035	0.070561	0.103017	0.0589398	0.128787
BHS	0.0863588	0.0856613	0.013106	0.0692758	0.10226	0.0571724	0.120991
ZWE	0.094753	0.0924253	0.01634	0.0780603	0.119146	0.0632358	0.136301
IRL	0.113562	0.111162	0.0196939	0.0923717	0.137367	0.0805101	0.20405
LKA	0.106348	0.104658	0.0163011	0.0869553	0.127712	0.0725172	0.154139
SRB	0.0878448	0.0866704	0.0121265	0.0733584	0.102999	0.059716	0.120397
COG	0.0970574	0.0950261	0.0162689	0.0786263	0.118817	0.0651112	0.137264
NZL	0.0931516	0.0916943	0.0130484	0.0787968	0.108006	0.0636218	0.141671
LVA	0.0995806	0.0971111	0.016929	0.0819159	0.11814	0.0692416	0.172464
AUS	0.0916831	0.0900122	0.0120058	0.0779902	0.109481	0.0643326	0.12073
FLK	0.0811035	0.0788728	0.0119303	0.067333	0.0963818	0.0554719	0.124049
ISR	0.0845937	0.0847489	0.0122099	0.0687764	0.0980705	0.0571258	0.112339
COL	0.0768819	0.0757901	0.0116411	0.0635491	0.0904777	0.054579	0.122514
FIN	0.106428	0.104588	0.0165581	0.0859203	0.129422	0.0752055	0.153593
GMB	0.0765528	0.0756296	0.0134321	0.0608018	0.0914452	0.0493314	0.122706
PRT	0.103991	0.103078	0.0160148	0.0838801	0.127076	0.0674764	0.149394
SAU	0.0896295	0.0894468	0.0121723	0.0738073	0.105851	0.0702599	0.124298
PNG	0.082004	0.0806848	0.0137216	0.0674029	0.0982877	0.0512606	0.147563
JAM	0.083065	0.0819701	0.014108	0.0677005	0.0996593	0.0600606	0.148906
PAK	0.0979161	0.0946214	0.0156264	0.0771839	0.121308	0.0683369	0.140425
ZMB	0.0910846	0.0877612	0.0162251	0.0728832	0.113218	0.0630473	0.144771
CHN	0.0881404	0.0872187	0.0161799	0.0677822	0.108353	0.0503995	0.131809
KAZ	0.0689777	0.0682539	0.0100077	0.0570779	0.0843139	0.0425882	0.0959404
ARM	0.0781962	0.0749161	0.0141815	0.0622958	0.101602	0.0535511	0.11616
LUX	0.116795	0.113805	0.0202881	0.0930117	0.141777	0.0727763	0.197132
ALB	0.0865563	0.0860768	0.0128961	0.0707075	0.102288	0.0547895	0.140805
HND	0.0873256	0.0860915	0.0150929	0.070604	0.103616	0.0546516	0.145317
NIC	0.085455	0.0858069	0.0138056	0.0679838	0.101336	0.0519266	0.114801
NER	0.0935551	0.0942546	0.0169637	0.0733174	0.116295	0.0595985	0.143729
ETH	0.104967	0.104345	0.0176084	0.0855771	0.129969	0.0675717	0.147148
GRL	0.0744987	0.0745155	0.0110278	0.0600658	0.0880662	0.0512791	0.101984
OMN	0.091573	0.0893795	0.0136249	0.0777494	0.113957	0.0570776	0.124685
ESP	0.11443	0.111356	0.0202192	0.089534	0.138858	0.0751397	0.185246
TJK	0.0836652	0.0816847	0.0137302	0.0669595	0.102226	0.0546355	0.123619
YEM	0.112089	0.110399	0.0190075	0.0896801	0.135449	0.0746243	0.168632
THA	0.0749264	0.0748724	0.0111198	0.0614485	0.08642	0.0498662	0.105054
UZB	0.0751147	0.0734892	0.0122159	0.0604046	0.0915125	0.048226	0.104854
DZA	0.0756796	0.0740945	0.0119397	0.0629369	0.0895761	0.0482198	0.110597
FRA	0.113015	0.11055	0.0178364	0.0915128	0.137443	0.0810537	0.168431
CRI	0.0862638	0.0867137	0.0132626	0.0690178	0.101156	0.0597325	0.131074
AUT	0.0897358	0.0863155	0.0161557	0.0700966	0.112893	0.0609981	0.138775
GHA	0.0914027	0.0912764	0.0173715	0.0708422	0.111454	0.0539718	0.150875
MEX	0.0736488	0.0731145	0.0112086	0.0602097	0.0868783	0.0504928	0.109567
HTI	0.104979	0.104137	0.017074	0.0846557	0.128893	0.0743997	0.161366
JPN	0.108933	0.105977	0.0166698	0.0897279	0.129085	0.0707779	0.158153
NPL	0.0767314	0.0759328	0.0130674	0.0615942	0.093445	0.0546256	0.119498
BGR	0.100919	0.099572	0.0162478	0.0816884	0.121281	0.067371	0.153605
DNK	0.106411	0.1045	0.0172339	0.0891627	0.123855	0.0706382	0.194892
MMR	0.0982437	0.094227	0.0181385	0.078268	0.124265	0.0651126	0.160526
SWZ	0.0750387	0.0725715	0.0124357	0.0605715	0.0929627	0.0500716	0.107579
CYP	0.103531	0.103018	0.0179592	0.0818675	0.125866	0.0657349	0.166531
ROU	0.112626	0.111778	0.0185494	0.0919632	0.133957	0.0694069	0.178072
DOM	0.0824093	0.0821468	0.0132719	0.066026	0.101343	0.0574381	0.125184
BRA	0.0731391	0.0727843	0.0108265	0.0584507	0.0866757	0.0517623	0.101717
ITA	0.102702	0.100978	0.0180831	0.0814469	0.126536	0.0626092	0.154614
SYR	0.120197	0.118573	0.0223053	0.0963558	0.151911	0.0703033	0.184034
CHL	0.0727596	0.0715624	0.0107828	0.0584873	0.0863169	0.0493105	0.0973355
BEL	0.116235	0.112997	0.0181462	0.0976053	0.141485	0.0788167	0.163419
EST	0.0974956	0.0930678	0.0195765	0.0737606	0.126747	0.0627291	0.150056
LBN	0.123966	0.120095	0.0213417	0.0987824	0.151349	0.0776574	0.175297
GIN	0.0914108	0.088157	0.018161	0.0719771	0.116005	0.0594021	0.145006
BRN	0.0708606	0.0693916	0.010564	0.0580159	0.087511	0.047913	0.0929024
MNG	0.0869552	0.0852683	0.0142272	0.0696405	0.105301	0.0559028	0.130743
PRY	0.0790233	0.0773077	0.0122195	0.0656866	0.0942679	0.0558989	0.11893
USA	0.0718568	0.0705209	0.0109433	0.0598711	0.0855553	0.0523536	0.105419
RWA	0.0771312	0.0745806	0.0130454	0.0616164	0.0951945	0.0521928	0.112272
PRK	0.112297	0.112702	0.0167596	0.0900946	0.133512	0.0765095	0.146632
NGA	0.0867753	0.0873061	0.0144958	0.0693469	0.105955	0.0533729	0.128449
BWA	0.0649078	0.0630282	0.0108213	0.0529991	0.0790253	0.0484746	0.101001
NOR	0.104666	0.103668	0.0131988	0.0885204	0.123622	0.0729608	0.133886
BIH	0.0962722	0.0952774	0.014174	0.0796809	0.113699	0.0599467	0.147216
BOL	0.110829	0.111284	0.0186009	0.0856663	0.13117	0.0710316	0.17881
AZE	0.0791857	0.0778191	0.0117953	0.0643221	0.0937512	0.0570538	0.122912
BLR	0.134755	0.137159	0.0200242	0.110933	0.158873	0.0838763	0.187133
KOR	0.0898952	0.0887495	0.0127281	0.0738865	0.106792	0.0670962	0.126112
RUS	0.0532563	0.053173	0.00777436	0.0434544	0.0627584	0.0390444	0.0777299
PER	0.0726682	0.0699704	0.0113396	0.059591	0.0890854	0.0523269	0.109959
VNM	0.0773871	0.0753187	0.0114878	0.06545	0.0933864	0.0497252	0.112381
PSE	0.137333	0.1359	0.0231102	0.111089	0.168019	0.0902803	0.208248
TUN	0.098009	0.0985049	0.0156081	0.0792553	0.116522	0.0602625	0.145063
NLD	0.114998	0.113068	0.0186622	0.0901394	0.139803	0.0820955	0.168007
GTM	0.0812778	0.081699	0.0114607	0.0675513	0.0944157	0.0578346	0.120356
URY	0.0743935	0.0716611	0.0118036	0.0606716	0.0890768	0.0530842	0.116391
HRV	0.100642	0.100209	0.0143582	0.0845593	0.116913	0.0716098	0.157884
IDN	0.0782201	0.0776871	0.0113877	0.063629	0.092064	0.0519416	0.111267
LAO	0.0980407	0.094512	0.016249	0.0784249	0.119274	0.0680201	0.13958
GUY	0.0734365	0.0714158	0.0103771	0.0621881	0.089964	0.0522377	0.105624
SLB	0.0906621	0.0883161	0.0145074	0.0736948	0.110808	0.0634816	0.145652
ISL	0.100181	0.0965623	0.0156821	0.082708	0.120885	0.069732	0.140465
MOZ	0.0958704	0.0935649	0.0161872	0.0768234	0.117502	0.0640737	0.142422
MLI	0.0895215	0.0883087	0.0141129	0.072763	0.108362	0.0646555	0.134405
PHL	0.0712538	0.0711401	0.0100654	0.0570613	0.0840663	0.0514913	0.0947577
CAN	0.0891135	0.0877564	0.0135697	0.0737781	0.104794	0.0618522	0.142809
CMR	0.0864268	0.0855612	0.014719	0.0688903	0.104127	0.0495571	0.1325
FJI	0.0884186	0.0868863	0.0128356	0.0731911	0.103486	0.0628669	0.144527
CIV	0.0723038	0.0713171	0.0118442	0.0581973	0.0895219	0.0462103	0.106141
TUR	0.101624	0.100191	0.0161626	0.0807333	0.121433	0.0661929	0.141427
LBR	0.0927347	0.0902192	0.0181653	0.0711677	0.115824	0.056169	0.148316
BEN	0.0783926	0.0756745	0.0133922	0.0617505	0.0950387	0.0549808	0.122021

## Sheet: Stats_CuCl
	mean	median	std	p10	p90	min	max
ARG	0.239544	0.233686	0.0408655	0.186598	0.291588	0.162691	0.362227
CHE	0.140418	0.137346	0.019118	0.118036	0.164826	0.10516	0.199311
USA	0.132663	0.131294	0.0226891	0.107448	0.164847	0.0921246	0.219459
UKR	0.196749	0.189225	0.0329301	0.159547	0.243862	0.137123	0.305076
IND	0.166982	0.166497	0.0295065	0.134077	0.202903	0.10623	0.282486
ESP	0.210508	0.203805	0.0400933	0.163742	0.26042	0.13452	0.369212
ARE	0.175595	0.17607	0.0317915	0.136886	0.217557	0.103933	0.259729
KOR	0.197035	0.189469	0.0390415	0.155839	0.245063	0.138334	0.364636
HUN	0.157715	0.15425	0.0237224	0.129201	0.192021	0.107512	0.211134
RUS	0.159361	0.153874	0.0284811	0.129146	0.196904	0.0990071	0.235492
FRA	0.134092	0.131289	0.0196394	0.111906	0.16219	0.0899666	0.184724
ZAF	0.231809	0.230041	0.0465921	0.175176	0.2918	0.145024	0.356501
NLD	0.243132	0.238695	0.0443381	0.186631	0.300523	0.151015	0.373058
SVN	0.176073	0.170827	0.0315809	0.135376	0.22013	0.122035	0.270052
CZE	0.178039	0.175692	0.0300335	0.140939	0.221597	0.123854	0.264275
IRN	0.248892	0.243627	0.0483556	0.195135	0.305166	0.170103	0.404257
MEX	0.215002	0.209467	0.0437559	0.16543	0.271388	0.138025	0.368648
JPN	0.278978	0.270859	0.0615962	0.205787	0.354173	0.166902	0.468352
BGR	0.159211	0.156728	0.0285715	0.126024	0.19132	0.108958	0.265117
SWE	0.113561	0.110728	0.0180286	0.0913564	0.140016	0.0801251	0.167177
FIN	0.179993	0.172801	0.0303584	0.146967	0.223018	0.117337	0.273044
CAN	0.234563	0.234779	0.04174	0.174674	0.287501	0.144331	0.344562
ROU	0.168936	0.16182	0.0293184	0.135318	0.208813	0.123022	0.249814
SVK	0.326302	0.319789	0.0621441	0.252127	0.422139	0.217086	0.472355
GBR	0.222544	0.218931	0.0366912	0.17792	0.271175	0.150005	0.326549
PAK	0.213823	0.209414	0.0364876	0.171905	0.263272	0.133354	0.321454
BRA	0.202493	0.202183	0.0382482	0.152333	0.24895	0.111636	0.299911
CHN	0.203351	0.201996	0.0369493	0.156702	0.254513	0.126877	0.295705
ARM	0.163327	0.156599	0.0280403	0.131303	0.202088	0.111913	0.247339
BEL	0.214811	0.209977	0.0373086	0.171812	0.266609	0.127113	0.313522

## Sheet: Stats_HB
	mean	median	std	p10	p90	min	max
CHE	0.439618	0.422462	0.126084	0.284988	0.60578	0.24145	0.847659
SLV	0.346366	0.347184	0.07445	0.249529	0.438871	0.200318	0.579457
ARG	0.416305	0.400637	0.113204	0.294722	0.557304	0.24164	0.830222
PAN	0.32382	0.322832	0.0762862	0.233099	0.42728	0.170679	0.506794
UKR	0.413888	0.392347	0.10922	0.290737	0.541875	0.232327	0.953035
GEO	0.296541	0.278629	0.0748817	0.217189	0.402398	0.15184	0.547482
CUB	0.4292	0.409351	0.106946	0.310965	0.574368	0.253137	0.820588
ECU	0.410211	0.392952	0.0990562	0.301037	0.536301	0.230683	0.678111
DEU	0.370802	0.359194	0.0940268	0.269778	0.496229	0.196814	0.684701
BFA	0.30432	0.305826	0.0676477	0.234772	0.404009	0.173845	0.508589
MDG	0.28221	0.278138	0.0613224	0.213509	0.361837	0.177007	0.487621
KGZ	0.321417	0.303122	0.0897014	0.226756	0.436878	0.134924	0.692919
IRQ	0.349695	0.34004	0.083169	0.25396	0.471928	0.147218	0.577795
SOM	0.336848	0.323846	0.0819026	0.241245	0.436816	0.159176	0.624491
NAM	0.293906	0.280443	0.071367	0.218126	0.413852	0.176917	0.491841
ARE	0.302693	0.296631	0.0737639	0.218492	0.394236	0.163721	0.541525
HUN	0.357575	0.349423	0.0767622	0.270287	0.465486	0.19862	0.545539
SEN	0.266524	0.260838	0.0649221	0.193175	0.363067	0.145234	0.439884
LBY	0.2724	0.269342	0.0697343	0.187316	0.364741	0.151196	0.506967
SDN	0.47007	0.461005	0.130801	0.333845	0.635139	0.255941	0.998219
MYS	0.3004	0.293821	0.075538	0.209205	0.389638	0.151069	0.572215
SUR	0.364031	0.359487	0.0914145	0.247727	0.479477	0.217379	0.690422
BLZ	0.39067	0.383274	0.0977585	0.27998	0.498183	0.200482	0.836327
SVN	0.395341	0.386251	0.0925717	0.294483	0.522426	0.227047	0.733853
CZE	0.33517	0.331747	0.0771205	0.235296	0.431765	0.171782	0.575634
IRN	0.325591	0.321322	0.0733316	0.238193	0.422132	0.18321	0.569948
SLE	0.320248	0.318977	0.0810575	0.207861	0.418966	0.151646	0.562757
JOR	0.312426	0.304067	0.0813435	0.208541	0.419219	0.169034	0.607932
LTU	0.353341	0.330014	0.0909185	0.250451	0.48362	0.201358	0.669149
SWE	0.310062	0.305277	0.0718904	0.237098	0.400617	0.148241	0.535741
POL	0.35485	0.340704	0.0961258	0.244236	0.470456	0.168854	0.642792
TZA	0.282278	0.266075	0.0736864	0.204693	0.3877	0.149487	0.518572
VEN	0.513208	0.49204	0.122867	0.348727	0.677323	0.293465	0.815231
KEN	0.312623	0.301116	0.0802406	0.223675	0.42316	0.177758	0.533005
SVK	0.347109	0.330466	0.0815828	0.252515	0.454071	0.181607	0.604709
GBR	0.353597	0.336657	0.0869425	0.255921	0.472336	0.192888	0.618285
MAR	0.289923	0.284405	0.0659468	0.20491	0.379995	0.176475	0.485626
AGO	0.306859	0.291406	0.0731351	0.224283	0.407622	0.170902	0.622074
KWT	0.258082	0.248883	0.0630968	0.181194	0.335172	0.115375	0.451778
UGA	0.303353	0.291103	0.088406	0.201601	0.425227	0.149177	0.695702
KHM	0.317638	0.305776	0.0781761	0.234101	0.402688	0.176355	0.673961
COD	0.32307	0.320019	0.0877624	0.221444	0.432646	0.165763	0.641061
QAT	0.269667	0.259133	0.0658975	0.194869	0.35998	0.13579	0.473426
BGD	0.320066	0.304737	0.0778265	0.233921	0.41444	0.162031	0.546929
GRC	0.374539	0.35965	0.0969999	0.265842	0.506976	0.157053	0.711737
IND	0.344522	0.320365	0.0854244	0.261789	0.458387	0.183695	0.588634
MDA	0.360953	0.355913	0.0919785	0.252728	0.47915	0.191793	0.625825
GAB	0.335856	0.336255	0.0809632	0.227103	0.436686	0.166635	0.544702
MWI	0.322888	0.311824	0.0772313	0.237487	0.449828	0.154995	0.50821
EGY	0.357085	0.339022	0.102247	0.251008	0.508702	0.205726	0.665581
MNE	0.42389	0.412909	0.100657	0.308223	0.564825	0.218267	0.769047
ZAF	0.264109	0.247291	0.070816	0.188601	0.348851	0.143605	0.528378
MKD	0.388088	0.384581	0.0977525	0.264992	0.522884	0.232012	0.649134
BHS	0.327091	0.316833	0.0861045	0.222499	0.424673	0.171033	0.686632
ZWE	0.321079	0.309515	0.0805381	0.218731	0.43057	0.192045	0.575285
IRL	0.360724	0.34417	0.0765827	0.28346	0.469065	0.177578	0.641623
LKA	0.390796	0.383307	0.100282	0.270785	0.51702	0.208555	0.638617
SRB	0.384502	0.377938	0.0847124	0.285469	0.499401	0.170077	0.632447
COG	0.331241	0.313694	0.0761995	0.250036	0.434862	0.190279	0.658943
NZL	0.327015	0.310525	0.0933875	0.215195	0.439478	0.174286	0.70884
LVA	0.332478	0.320744	0.0772435	0.239449	0.454277	0.158276	0.541423
AUS	0.330834	0.320642	0.0820308	0.233126	0.433853	0.188555	0.599887
FLK	0.313233	0.306272	0.0768058	0.225369	0.427356	0.141912	0.541486
ISR	0.29943	0.286564	0.0803161	0.20155	0.417369	0.160635	0.498179
COL	0.289885	0.275934	0.0724589	0.207404	0.390706	0.130489	0.536073
FIN	0.355433	0.343078	0.098412	0.239135	0.478772	0.162793	0.664552
GMB	0.257723	0.246123	0.0608799	0.19194	0.328352	0.133114	0.479068
PRT	0.348315	0.344854	0.100454	0.228906	0.470478	0.154631	0.748123
SAU	0.320106	0.317056	0.0828367	0.21946	0.426999	0.137236	0.566377
PNG	0.30067	0.290163	0.0748076	0.211011	0.392307	0.168397	0.558393
JAM	0.329066	0.325785	0.0842785	0.22928	0.448947	0.1698	0.628873
PAK	0.35673	0.343861	0.0891265	0.24203	0.480269	0.191589	0.564978
ZMB	0.326315	0.325911	0.0819661	0.229112	0.420564	0.190842	0.677871
CHN	0.307673	0.302697	0.082662	0.208816	0.406993	0.151312	0.554253
KAZ	0.27484	0.269691	0.0649479	0.190824	0.358679	0.132316	0.454998
ARM	0.297341	0.294614	0.0676612	0.221422	0.378479	0.14806	0.518964
LUX	0.355569	0.345914	0.08154	0.25983	0.460497	0.215763	0.660206
ALB	0.372248	0.354501	0.0942399	0.266516	0.488582	0.233808	0.69212
HND	0.346555	0.345799	0.0814801	0.244173	0.463708	0.169813	0.556013
NIC	0.344453	0.326692	0.0893695	0.239587	0.467935	0.195781	0.628072
NER	0.323657	0.331491	0.0755332	0.239077	0.412165	0.177431	0.654121
ETH	0.354646	0.340993	0.0824974	0.247561	0.450956	0.216861	0.595635
GRL	0.363201	0.347878	0.0972956	0.259123	0.493837	0.181015	0.699668
OMN	0.326337	0.315246	0.0816497	0.233722	0.431305	0.151994	0.633852
ESP	0.365056	0.358465	0.0792061	0.28013	0.467092	0.231672	0.704483
TJK	0.33107	0.32378	0.0770849	0.249285	0.41595	0.169229	0.601086
YEM	0.417668	0.397532	0.104868	0.304745	0.544955	0.212269	0.710446
THA	0.283103	0.270763	0.0695406	0.202234	0.385166	0.166243	0.543543
UZB	0.298992	0.288639	0.0727036	0.206216	0.39531	0.164777	0.539422
DZA	0.286424	0.277039	0.0659019	0.212294	0.391752	0.170046	0.467311
FRA	0.344902	0.340018	0.0874621	0.251376	0.475795	0.171531	0.586105
CRI	0.337142	0.325419	0.0889679	0.243014	0.437209	0.192635	0.776822
AUT	0.322252	0.302153	0.087923	0.223889	0.433753	0.175316	0.620148
GHA	0.331371	0.316085	0.0864056	0.232766	0.432136	0.177349	0.657554
MEX	0.302676	0.289008	0.0760604	0.218622	0.417638	0.160969	0.527466
HTI	0.387923	0.37115	0.0937354	0.269296	0.506315	0.215658	0.618488
JPN	0.43329	0.424568	0.0878437	0.336153	0.565726	0.243202	0.653662
NPL	0.304826	0.298734	0.0701882	0.221574	0.384308	0.156933	0.541964
BGR	0.349022	0.335362	0.0830618	0.263608	0.467009	0.209291	0.639209
DNK	0.344048	0.328148	0.0847944	0.254532	0.462055	0.175325	0.654928
MMR	0.355413	0.337047	0.0818946	0.271085	0.475938	0.196721	0.56658
SWZ	0.285675	0.281837	0.0661606	0.204478	0.382755	0.144541	0.482873
CYP	0.351698	0.341661	0.0955708	0.250611	0.478023	0.175864	0.686967
ROU	0.360729	0.341265	0.0898088	0.258376	0.49324	0.204826	0.623203
DOM	0.331163	0.324212	0.0753452	0.239306	0.4235	0.179753	0.559349
BRA	0.308491	0.286922	0.0949047	0.206549	0.427257	0.143945	0.63172
ITA	0.339143	0.329134	0.0786868	0.248527	0.446187	0.185784	0.585085
SYR	0.447489	0.424593	0.11394	0.333244	0.637721	0.264589	0.836274
CHL	0.27391	0.26607	0.0648923	0.193373	0.360479	0.172472	0.503641
BEL	0.374749	0.358676	0.0922695	0.27036	0.497767	0.211496	0.615706
EST	0.333654	0.321733	0.0897333	0.235995	0.471489	0.161762	0.566366
LBN	0.472197	0.460116	0.115062	0.328649	0.633452	0.251848	0.800146
GIN	0.330092	0.318706	0.0724154	0.249917	0.430891	0.17847	0.543157
BRN	0.273708	0.26611	0.0632187	0.198865	0.357259	0.156946	0.504123
MNG	0.312397	0.296833	0.0765371	0.229969	0.424513	0.14813	0.549143
PRY	0.305615	0.293626	0.0794305	0.219234	0.401538	0.154137	0.544844
USA	0.309891	0.306215	0.0715926	0.227687	0.415233	0.176765	0.521407
RWA	0.280829	0.267772	0.0719752	0.203348	0.374243	0.157714	0.523929
PRK	0.417124	0.409852	0.104489	0.298319	0.56783	0.211988	0.80214
NGA	0.309843	0.291627	0.0740547	0.225041	0.399019	0.16845	0.571062
BWA	0.241006	0.230821	0.0653784	0.167657	0.324011	0.130484	0.443122
NOR	0.419204	0.409715	0.0982957	0.302189	0.542653	0.219809	0.680255
BIH	0.427669	0.409364	0.104396	0.310466	0.551534	0.194719	0.843654
BOL	0.401822	0.391516	0.0959691	0.295264	0.517894	0.214011	0.825143
AZE	0.298235	0.291686	0.0637002	0.225483	0.387482	0.181603	0.477954
BLR	0.487301	0.469471	0.12008	0.349391	0.662451	0.274638	0.836559
KOR	0.325448	0.313814	0.0755672	0.236869	0.439557	0.162041	0.525243
RUS	0.297103	0.287497	0.0774895	0.215594	0.392088	0.165266	0.681087
PER	0.304665	0.296823	0.0787376	0.212676	0.413483	0.169838	0.536221
VNM	0.30328	0.301037	0.0709055	0.21483	0.39122	0.137235	0.491053
PSE	0.483446	0.470377	0.113955	0.354884	0.627492	0.270406	0.864389
TUN	0.363488	0.351936	0.0843461	0.264222	0.48668	0.194249	0.678327
NLD	0.331834	0.322892	0.0723666	0.243819	0.434287	0.215675	0.544346
GTM	0.328553	0.324046	0.0786275	0.230691	0.424307	0.169677	0.555525
URY	0.282916	0.275069	0.0662512	0.205813	0.380103	0.154456	0.472972
HRV	0.353617	0.33619	0.103947	0.247838	0.485741	0.147241	0.710537
IDN	0.286159	0.27583	0.0762019	0.203634	0.390562	0.151863	0.499153
LAO	0.361961	0.342586	0.0901744	0.261464	0.496316	0.222067	0.662957
GUY	0.297053	0.287715	0.0683333	0.218596	0.37806	0.167884	0.520585
SLB	0.327472	0.314169	0.0911518	0.230157	0.453509	0.178235	0.74774
ISL	0.390845	0.374323	0.102217	0.277413	0.52055	0.215976	0.792722
MOZ	0.337273	0.328494	0.0883241	0.231647	0.459691	0.199513	0.642561
MLI	0.311261	0.304174	0.0741329	0.219101	0.399095	0.186887	0.575831
PHL	0.280735	0.276622	0.0649971	0.210505	0.37798	0.124512	0.443169
CAN	0.319882	0.306074	0.0887993	0.22066	0.437756	0.161697	0.665767
CMR	0.319066	0.300074	0.0801224	0.231877	0.443322	0.170252	0.530233
FJI	0.316263	0.316895	0.0734217	0.228594	0.399169	0.132095	0.56697
CIV	0.264873	0.24698	0.0726459	0.195268	0.364992	0.115176	0.499778
TUR	0.429613	0.428394	0.101659	0.298867	0.575028	0.240204	0.71381
LBR	0.326289	0.321521	0.081254	0.241952	0.420794	0.151753	0.567995
BEN	0.272811	0.261841	0.0686538	0.188905	0.369147	0.156407	0.442151

## Sheet: Stats_HTL
	mean	median	std	p10	p90	min	max
CHE	0.292612	0.294736	0.0411097	0.241845	0.335468	0.207849	0.417329
SLV	0.228947	0.227618	0.0345995	0.185225	0.273675	0.155403	0.34102
ARG	0.276574	0.273256	0.0467297	0.217263	0.343364	0.185281	0.397872
PAN	0.189818	0.185429	0.0237734	0.163564	0.219688	0.140361	0.263818
UKR	0.295313	0.294702	0.0442019	0.236062	0.354605	0.213914	0.416107
GEO	0.156345	0.157631	0.0224993	0.1292	0.183625	0.109972	0.22302
CUB	0.299028	0.296543	0.0432157	0.245378	0.356612	0.196019	0.418863
ECU	0.269567	0.265261	0.0395663	0.222871	0.320745	0.172756	0.381617
DEU	0.256711	0.256736	0.033108	0.218813	0.288875	0.183232	0.403924
BFA	0.205392	0.204108	0.0312696	0.169466	0.246583	0.143556	0.277539
MDG	0.175842	0.172531	0.027565	0.142496	0.212854	0.123093	0.253817
KGZ	0.199452	0.193922	0.0313759	0.162548	0.240758	0.133072	0.281988
IRQ	0.232899	0.234051	0.0296264	0.194225	0.262704	0.168212	0.346292
SOM	0.254324	0.249773	0.037167	0.211806	0.305366	0.184201	0.369722
NAM	0.194189	0.192837	0.0277355	0.160527	0.229103	0.137932	0.26827
ARE	0.180733	0.177431	0.0217078	0.155989	0.209372	0.13687	0.262042
HUN	0.205313	0.208123	0.0243285	0.173262	0.232722	0.147946	0.270602
SEN	0.163065	0.162305	0.0244051	0.134803	0.19111	0.102665	0.247786
LBY	0.155716	0.152232	0.0207131	0.130524	0.18305	0.119637	0.207469
SDN	0.317145	0.313552	0.0542884	0.241178	0.383032	0.202409	0.445299
MYS	0.163885	0.162225	0.0221378	0.136769	0.18919	0.120905	0.249478
SUR	0.211607	0.207715	0.0362644	0.168078	0.264441	0.139467	0.31203
BLZ	0.248766	0.245205	0.0404457	0.202402	0.301873	0.173644	0.394023
SVN	0.238473	0.233825	0.0273702	0.203284	0.274282	0.184605	0.354188
CZE	0.184245	0.185063	0.0246337	0.154102	0.212052	0.137962	0.243209
IRN	0.211938	0.206083	0.033315	0.17124	0.262719	0.150063	0.293225
SLE	0.214898	0.216542	0.0336588	0.170002	0.258147	0.144176	0.315004
JOR	0.198039	0.196967	0.0251087	0.169291	0.231556	0.148166	0.281173
LTU	0.207874	0.208464	0.0247417	0.174276	0.236821	0.149121	0.279463
SWE	0.168588	0.166685	0.020119	0.143832	0.198145	0.131593	0.23605
POL	0.221982	0.219741	0.0257052	0.193873	0.248465	0.153979	0.326138
TZA	0.170704	0.168074	0.024162	0.142008	0.200992	0.121543	0.247803
VEN	0.359825	0.351086	0.0644306	0.285699	0.441886	0.247165	0.564677
KEN	0.230285	0.22782	0.0342124	0.186828	0.272971	0.163947	0.329788
SVK	0.202812	0.200786	0.0214498	0.17542	0.231099	0.152285	0.259275
GBR	0.260034	0.257492	0.033509	0.221689	0.306902	0.178006	0.398779
MAR	0.1737	0.172434	0.0267433	0.138931	0.205624	0.11441	0.253023
AGO	0.192559	0.188129	0.0294676	0.157191	0.231676	0.136703	0.2708
KWT	0.148555	0.147757	0.0186739	0.127925	0.174802	0.0951967	0.206155
UGA	0.17823	0.17488	0.0262905	0.14914	0.208409	0.118706	0.256954
KHM	0.185917	0.18517	0.0283582	0.148057	0.214574	0.12452	0.289099
COD	0.198392	0.196718	0.0306943	0.16004	0.241247	0.140499	0.294083
QAT	0.14607	0.143517	0.0195989	0.120416	0.175474	0.108224	0.211153
BGD	0.196833	0.19254	0.0274315	0.161407	0.234655	0.139852	0.280522
GRC	0.2341	0.232218	0.0306955	0.195303	0.272925	0.170126	0.329553
IND	0.159191	0.155342	0.0229711	0.132959	0.18943	0.109067	0.213941
MDA	0.22498	0.219598	0.0319134	0.187329	0.270989	0.143036	0.305062
GAB	0.236728	0.236219	0.037251	0.187937	0.286035	0.160654	0.332574
MWI	0.217095	0.213173	0.0335277	0.174224	0.266063	0.159849	0.290327
EGY	0.222952	0.216587	0.03188	0.187056	0.262462	0.156436	0.314192
MNE	0.232566	0.228531	0.0319884	0.196749	0.280236	0.169054	0.320875
ZAF	0.165766	0.16263	0.0237814	0.139414	0.189822	0.118053	0.269776
MKD	0.209842	0.208627	0.0278968	0.175748	0.245002	0.153429	0.303796
BHS	0.21646	0.217368	0.0260647	0.18054	0.253521	0.156588	0.29275
ZWE	0.227759	0.222299	0.0378265	0.185015	0.276547	0.147403	0.327036
IRL	0.243983	0.241749	0.0310619	0.208993	0.278572	0.179554	0.347744
LKA	0.273656	0.277577	0.0448033	0.21417	0.328255	0.171579	0.375979
SRB	0.217225	0.212733	0.0313945	0.185073	0.252632	0.153452	0.368027
COG	0.234035	0.230494	0.0352268	0.189812	0.280917	0.158081	0.35764
NZL	0.23379	0.235333	0.0304332	0.19818	0.265139	0.162452	0.358724
LVA	0.200144	0.200766	0.0232775	0.171234	0.231648	0.152351	0.249224
AUS	0.24108	0.237633	0.0336403	0.199681	0.288469	0.172751	0.340648
FLK	0.198075	0.197329	0.0254369	0.162473	0.229452	0.14246	0.260977
ISR	0.20314	0.199693	0.0256832	0.172017	0.238278	0.142632	0.300144
COL	0.163694	0.161714	0.0235505	0.138404	0.198497	0.117157	0.247187
FIN	0.216733	0.215748	0.0287203	0.185565	0.251451	0.152916	0.308081
GMB	0.160685	0.159065	0.024431	0.131647	0.191705	0.103244	0.237787
PRT	0.214475	0.212128	0.0252316	0.180945	0.24634	0.154298	0.285228
SAU	0.22067	0.219088	0.029239	0.182338	0.259708	0.162538	0.327065
PNG	0.196507	0.191899	0.0274956	0.158862	0.229515	0.143095	0.268237
JAM	0.199036	0.19823	0.0263716	0.167313	0.235626	0.139864	0.260052
PAK	0.245923	0.242939	0.0332167	0.206443	0.285474	0.173038	0.34326
ZMB	0.221963	0.217044	0.0351088	0.179968	0.264029	0.15069	0.303724
CHN	0.144175	0.142391	0.020302	0.119481	0.169553	0.103047	0.221292
KAZ	0.160247	0.159986	0.0198388	0.137292	0.18615	0.112299	0.206081
ARM	0.186337	0.186609	0.0248167	0.157062	0.215323	0.138486	0.26127
LUX	0.257179	0.256775	0.0301767	0.223102	0.295776	0.178437	0.357138
ALB	0.202536	0.198053	0.0268757	0.170887	0.234381	0.146212	0.296677
HND	0.219501	0.217706	0.0327916	0.178076	0.261041	0.130539	0.326786
NIC	0.191001	0.188822	0.0261408	0.162238	0.222884	0.111393	0.261383
NER	0.23087	0.227089	0.036134	0.188592	0.281329	0.149464	0.306729
ETH	0.25666	0.252758	0.0347198	0.217211	0.303133	0.165249	0.334682
GRL	0.178413	0.176191	0.0225321	0.150501	0.204034	0.135498	0.247572
OMN	0.224654	0.224813	0.0265121	0.191477	0.255832	0.166584	0.29505
ESP	0.245706	0.243379	0.0305445	0.209466	0.280365	0.172431	0.345335
TJK	0.197595	0.194254	0.0289574	0.163681	0.233419	0.145035	0.281952
YEM	0.300126	0.29961	0.0427108	0.247369	0.358233	0.20363	0.396791
THA	0.160042	0.159427	0.0228225	0.134907	0.18456	0.101888	0.243618
UZB	0.174879	0.170467	0.0262273	0.145587	0.211194	0.12713	0.254348
DZA	0.168317	0.166326	0.0223512	0.140999	0.20001	0.125064	0.216477
FRA	0.250841	0.250356	0.028997	0.212187	0.28385	0.19612	0.360411
CRI	0.210729	0.206596	0.0285703	0.175718	0.248413	0.155079	0.293264
AUT	0.17481	0.173637	0.0194037	0.147316	0.198196	0.126948	0.233577
GHA	0.224433	0.224632	0.037781	0.178471	0.28044	0.159797	0.318614
MEX	0.159477	0.158458	0.0206101	0.131267	0.184132	0.113795	0.2318
HTI	0.27088	0.264291	0.0484273	0.213404	0.340413	0.185042	0.414004
JPN	0.25461	0.250548	0.0294495	0.220214	0.293929	0.181243	0.342683
NPL	0.180983	0.180254	0.0239879	0.151635	0.210502	0.136844	0.243504
BGR	0.202554	0.199515	0.0251623	0.171266	0.233368	0.1441	0.269065
DNK	0.239587	0.239278	0.0303514	0.204036	0.276923	0.169264	0.342314
MMR	0.248489	0.246322	0.0406707	0.199769	0.299547	0.178164	0.383314
SWZ	0.170516	0.168995	0.0238758	0.142983	0.203752	0.124356	0.237327
CYP	0.221793	0.217787	0.025943	0.188489	0.251905	0.170117	0.313345
ROU	0.231509	0.232664	0.0301095	0.195064	0.265524	0.166278	0.321342
DOM	0.197841	0.196914	0.0244413	0.168585	0.225556	0.147456	0.287043
BRA	0.165113	0.16155	0.0221512	0.136672	0.194899	0.123101	0.234799
ITA	0.203235	0.202747	0.0240895	0.17355	0.235844	0.143241	0.274239
SYR	0.329396	0.323843	0.0546586	0.262393	0.397648	0.214713	0.496653
CHL	0.161341	0.158811	0.0204881	0.139213	0.185025	0.114417	0.240661
BEL	0.251139	0.251703	0.0307363	0.212683	0.284502	0.175474	0.382431
EST	0.191559	0.192001	0.0210413	0.162554	0.216313	0.138442	0.255917
LBN	0.339445	0.336786	0.0556312	0.271494	0.410204	0.197041	0.484188
GIN	0.217901	0.217793	0.0330976	0.176013	0.2589	0.150913	0.294917
BRN	0.165744	0.165529	0.0181113	0.142188	0.187973	0.131016	0.232799
MNG	0.209861	0.211404	0.027905	0.172292	0.241444	0.157538	0.297013
PRY	0.177999	0.175018	0.0249953	0.146915	0.211557	0.132256	0.271043
USA	0.186523	0.183265	0.0236568	0.159969	0.21662	0.143934	0.2827
RWA	0.171523	0.170719	0.0241465	0.14	0.198758	0.115058	0.237793
PRK	0.291567	0.28652	0.0446551	0.237384	0.348984	0.195947	0.411116
NGA	0.199273	0.197197	0.0312365	0.162212	0.240839	0.119161	0.282969
BWA	0.135185	0.134612	0.0175203	0.114491	0.154229	0.0991227	0.190384
NOR	0.272257	0.270134	0.0350794	0.227728	0.31472	0.198656	0.394291
BIH	0.244806	0.240721	0.0321634	0.207655	0.28974	0.184197	0.351136
BOL	0.275756	0.279325	0.0434711	0.215771	0.328301	0.171519	0.408418
AZE	0.188011	0.186551	0.0221189	0.161829	0.215921	0.151275	0.280899
BLR	0.361101	0.355262	0.0611076	0.288078	0.442359	0.227797	0.50459
KOR	0.219586	0.216873	0.0301691	0.184628	0.256653	0.139157	0.318072
RUS	0.176841	0.174374	0.0216021	0.150179	0.204815	0.131471	0.229619
PER	0.154739	0.153617	0.0212161	0.131152	0.184932	0.101853	0.200307
VNM	0.178106	0.175367	0.0226721	0.150358	0.211763	0.131524	0.241006
PSE	0.36469	0.371743	0.0622366	0.278606	0.451475	0.225373	0.533669
TUN	0.241526	0.241334	0.0393026	0.199761	0.286528	0.151595	0.421201
NLD	0.244132	0.24019	0.0323271	0.208279	0.280551	0.173082	0.354399
GTM	0.195908	0.196152	0.024261	0.168158	0.226442	0.140636	0.258954
URY	0.160445	0.159339	0.0212503	0.136196	0.184799	0.117457	0.232954
HRV	0.210599	0.210756	0.0236031	0.181437	0.235825	0.148188	0.286379
IDN	0.181087	0.178224	0.0239093	0.151868	0.212331	0.136185	0.266125
LAO	0.245283	0.238826	0.0401117	0.200029	0.298613	0.150581	0.359618
GUY	0.156752	0.156665	0.0206415	0.130665	0.18348	0.116082	0.216988
SLB	0.216472	0.216913	0.030589	0.175609	0.252335	0.145752	0.309803
ISL	0.252739	0.252179	0.0303464	0.212756	0.28912	0.18669	0.340194
MOZ	0.229467	0.228046	0.0374669	0.18036	0.279447	0.150157	0.334292
MLI	0.220961	0.222065	0.0319106	0.174003	0.261802	0.159861	0.301068
PHL	0.154759	0.156887	0.0170404	0.132159	0.173929	0.113858	0.196067
CAN	0.22959	0.227635	0.028354	0.1889	0.260244	0.172573	0.339738
CMR	0.203706	0.204566	0.0334251	0.159064	0.244368	0.144809	0.299605
FJI	0.21406	0.213096	0.0274898	0.177987	0.248051	0.160739	0.317271
CIV	0.158377	0.159067	0.0231221	0.130014	0.191839	0.111237	0.201835
TUR	0.257521	0.257376	0.029311	0.223805	0.298127	0.189886	0.368183
LBR	0.221938	0.218702	0.033785	0.180644	0.269614	0.142303	0.321551
BEN	0.167785	0.164621	0.0227578	0.142272	0.20097	0.124421	0.233233

[truncated: 19 more sheets: Stats_HTSE, Stats_HVO_diesel, Stats_HVO_kerosene, Stats_M_PYR, Stats_PTM, Stats_RWGS_FT_diesel, Stats_RWGS_FT_kerosene, Stats_RWGS_MeOH_methanol, Stats_RWGS_MeOH_DME, Stats_RWGS_MeOH_kerosene, Stats_SMR_CCS, Stats_SOEC, Stats_SR_FT_diesel, Stats_SR_FT_kerosene, Stats_ST_FT_diesel, Stats_ST_FT_kerosene, Stats_TG_CCS, Stats_TG_FT_diesel, Stats_TG_FT_kerosene]
