# Supplementary material for: Global cost drivers and regional trade-offs for low-carbon fuels: a prospective techno-economic assessment
Source: Royal Society of Chemistry journal article supplement (doi:10.1039/d5ee05591a), 2026-01-01
Supplement: d5ee05591a2.zip [file monte_carlo_stats_Base30.xlsx]

## Sheet: Stats_PEM
	mean	median	std	p10	p90	min	max
CHE	0.204674	0.20123	0.041011	0.156484	0.262051	0.127875	0.305826
SLV	0.159487	0.155766	0.0315737	0.122759	0.202892	0.092538	0.25294
ARG	0.175795	0.173935	0.0401817	0.127877	0.218157	0.112459	0.346538
PAN	0.14698	0.138776	0.0350895	0.1068	0.193875	0.0914272	0.261752
UKR	0.190736	0.181743	0.0403782	0.147878	0.244995	0.116276	0.311668
GEO	0.136801	0.133658	0.0263053	0.105469	0.17281	0.0868984	0.235301
CUB	0.181621	0.177945	0.0314289	0.143409	0.223311	0.113773	0.24794
ECU	0.172365	0.169175	0.0303934	0.135859	0.215555	0.10316	0.236635
DEU	0.164056	0.158343	0.0321519	0.129428	0.205647	0.105356	0.277449
BFA	0.132036	0.128838	0.0281826	0.0988339	0.167086	0.0803482	0.226358
MDG	0.123461	0.122307	0.0258005	0.0945357	0.157026	0.0664241	0.192035
KGZ	0.152226	0.148823	0.0359781	0.116395	0.182985	0.081414	0.314585
IRQ	0.155399	0.150626	0.0369587	0.117466	0.202575	0.0911978	0.345775
SOM	0.144647	0.138923	0.0310174	0.110149	0.184637	0.0861398	0.258099
NAM	0.124903	0.12072	0.0279651	0.0906672	0.16259	0.0740512	0.203815
ARE	0.131718	0.128983	0.0272529	0.100054	0.167721	0.0703271	0.203372
HUN	0.153134	0.146879	0.0292858	0.119039	0.199163	0.0937003	0.221492
SEN	0.123673	0.120183	0.0270784	0.0951582	0.162583	0.0770819	0.229202
LBY	0.124022	0.121596	0.0248888	0.0951741	0.159605	0.0725405	0.177554
SDN	0.176961	0.177672	0.0330554	0.136083	0.219956	0.100704	0.269266
MYS	0.137285	0.13857	0.0283015	0.101394	0.176078	0.0866704	0.212203
SUR	0.157811	0.154452	0.0308847	0.123051	0.192742	0.096623	0.259087
BLZ	0.167911	0.16142	0.0387599	0.130714	0.216227	0.0847054	0.320322
SVN	0.176369	0.175101	0.0382559	0.132021	0.225166	0.0963505	0.298534
CZE	0.148814	0.142172	0.0339443	0.110724	0.192846	0.0758236	0.247736
IRN	0.139775	0.135496	0.0292311	0.106601	0.180564	0.0890194	0.241664
SLE	0.14372	0.141791	0.0236856	0.118992	0.177818	0.0899307	0.212315
JOR	0.133161	0.127265	0.0266949	0.103202	0.173126	0.089044	0.193547
LTU	0.15083	0.147075	0.0297785	0.114907	0.187098	0.0886776	0.237409
SWE	0.137418	0.130935	0.0313766	0.0982505	0.180688	0.0831966	0.229224
POL	0.156435	0.155081	0.0315017	0.116494	0.19843	0.0875322	0.23384
TZA	0.124504	0.119683	0.0260825	0.0949311	0.157876	0.0857693	0.212751
VEN	0.222155	0.21597	0.0455602	0.169792	0.289029	0.138609	0.391397
KEN	0.130215	0.128634	0.024984	0.102	0.158186	0.0725788	0.204536
SVK	0.154475	0.15183	0.0263795	0.124535	0.18988	0.0997349	0.218952
GBR	0.157989	0.152829	0.0315758	0.120776	0.196814	0.089662	0.250049
MAR	0.126908	0.123912	0.0256877	0.0985946	0.157562	0.0721086	0.211281
AGO	0.134859	0.12998	0.0289312	0.101318	0.173906	0.0848591	0.212242
KWT	0.11619	0.112347	0.0231529	0.0921342	0.145975	0.0662332	0.195613
UGA	0.136083	0.136938	0.0290595	0.0980436	0.169938	0.0845583	0.225625
KHM	0.136925	0.130153	0.0315205	0.10215	0.176008	0.081689	0.228312
COD	0.134547	0.133665	0.0246807	0.105392	0.165157	0.0737737	0.19871
QAT	0.117803	0.110834	0.0279705	0.0899043	0.149321	0.0779454	0.219522
BGD	0.141499	0.142304	0.024949	0.110041	0.17124	0.0887915	0.215158
GRC	0.16825	0.168956	0.0337233	0.123768	0.214823	0.107573	0.259866
IND	0.16158	0.155772	0.0366961	0.117902	0.215189	0.0953907	0.244521
MDA	0.158792	0.152657	0.0289865	0.124933	0.209406	0.114861	0.239233
GAB	0.14804	0.142139	0.0293529	0.119496	0.18505	0.0802716	0.229128
MWI	0.137897	0.132642	0.0291628	0.103533	0.178286	0.0630701	0.213035
EGY	0.149934	0.150335	0.0269514	0.116144	0.181479	0.09319	0.227812
MNE	0.190017	0.185478	0.0405672	0.138753	0.244713	0.111796	0.327183
ZAF	0.118589	0.117428	0.0250965	0.0890425	0.152288	0.070523	0.188714
MKD	0.181194	0.176203	0.0399789	0.131178	0.234004	0.10407	0.322035
BHS	0.137108	0.133729	0.02693	0.105154	0.170355	0.0762344	0.233469
ZWE	0.139239	0.137184	0.0264896	0.107958	0.168418	0.085547	0.211411
IRL	0.157585	0.151873	0.0316216	0.123137	0.201092	0.0966437	0.235123
LKA	0.164843	0.164338	0.0329004	0.127146	0.201754	0.0993287	0.267584
SRB	0.178543	0.180604	0.0369588	0.13202	0.222025	0.104364	0.287118
COG	0.150778	0.151834	0.0262586	0.112939	0.18255	0.0936115	0.227723
NZL	0.145792	0.144365	0.028839	0.110662	0.184009	0.0867363	0.24822
LVA	0.155719	0.144205	0.0403288	0.116244	0.204748	0.0954856	0.331974
AUS	0.145434	0.142502	0.0291922	0.113715	0.183204	0.0936605	0.264091
FLK	0.168839	0.162276	0.0353051	0.130468	0.215008	0.0968123	0.264514
ISR	0.13243	0.13122	0.023585	0.103122	0.159907	0.0859291	0.229251
COL	0.131562	0.123882	0.0307073	0.10084	0.167187	0.086162	0.244116
FIN	0.184859	0.17943	0.0367865	0.143387	0.245235	0.102342	0.276979
GMB	0.118788	0.114688	0.0231211	0.094127	0.148709	0.0672715	0.188063
PRT	0.162076	0.158943	0.0400874	0.119562	0.218363	0.0929846	0.308877
SAU	0.141527	0.138695	0.0260896	0.113935	0.175967	0.0900819	0.216661
PNG	0.138768	0.137242	0.0299669	0.09824	0.174392	0.0825494	0.264445
JAM	0.145568	0.140882	0.028746	0.110351	0.184436	0.097204	0.237601
PAK	0.155159	0.148262	0.0323063	0.11963	0.200013	0.0892662	0.273437
ZMB	0.14492	0.143589	0.0271863	0.112871	0.176888	0.099424	0.223933
CHN	0.130573	0.127679	0.0286154	0.098468	0.166023	0.0791196	0.221824
KAZ	0.139938	0.134582	0.0305501	0.104718	0.183196	0.092748	0.226027
ARM	0.149148	0.146406	0.0355516	0.110306	0.19256	0.0867072	0.312805
LUX	0.165144	0.162485	0.0300181	0.128307	0.206054	0.0938667	0.246976
ALB	0.174997	0.173927	0.0366042	0.129952	0.230662	0.111851	0.277884
HND	0.150301	0.14613	0.0329559	0.114192	0.190227	0.0916629	0.281394
NIC	0.143754	0.142018	0.0236518	0.117006	0.172425	0.0953074	0.217229
NER	0.135537	0.134265	0.0279561	0.101415	0.172084	0.08302	0.232725
ETH	0.15485	0.151191	0.0289752	0.121252	0.190143	0.105461	0.245556
GRL	0.179077	0.169335	0.0436941	0.130445	0.22995	0.0953806	0.314771
OMN	0.140276	0.134694	0.0316439	0.106906	0.180744	0.0852124	0.25397
ESP	0.167754	0.161212	0.0355519	0.129378	0.220253	0.102151	0.29661
TJK	0.153362	0.148161	0.03622	0.114025	0.195468	0.0962195	0.286786
YEM	0.174682	0.170477	0.0355458	0.132304	0.228935	0.103048	0.26529
THA	0.13429	0.131933	0.027739	0.103999	0.170383	0.0784592	0.22261
UZB	0.146521	0.140226	0.0297856	0.113738	0.190116	0.0904117	0.209752
DZA	0.130093	0.12451	0.0264695	0.0980972	0.172201	0.0814412	0.193708
FRA	0.158996	0.14984	0.0336811	0.127147	0.195396	0.0952601	0.306094
CRI	0.15647	0.154732	0.0318637	0.120649	0.192406	0.0837798	0.262464
AUT	0.135855	0.130142	0.0279594	0.10367	0.172757	0.0896296	0.21702
GHA	0.148297	0.14585	0.0315066	0.110918	0.184586	0.0779989	0.240425
MEX	0.130164	0.127068	0.0308908	0.0946002	0.169126	0.0775059	0.227088
HTI	0.162628	0.161585	0.0312411	0.126846	0.19912	0.0915369	0.254416
JPN	0.21376	0.204694	0.0412923	0.166558	0.265178	0.122395	0.323024
NPL	0.135995	0.132415	0.0263932	0.103402	0.167222	0.0926034	0.259803
BGR	0.156432	0.150773	0.0339635	0.117358	0.205863	0.103236	0.247951
DNK	0.147446	0.142579	0.0296655	0.111861	0.19205	0.0857516	0.231379
MMR	0.161012	0.153432	0.0350426	0.120396	0.208235	0.0952108	0.283625
SWZ	0.123423	0.115573	0.0265229	0.0926658	0.162733	0.0782781	0.211127
CYP	0.167085	0.164884	0.0342848	0.127613	0.214167	0.105136	0.272322
ROU	0.168993	0.163668	0.0355138	0.130394	0.204304	0.0984851	0.300723
DOM	0.141674	0.138022	0.0318274	0.104154	0.178376	0.0837015	0.249645
BRA	0.126551	0.123151	0.0257242	0.0976916	0.16204	0.073922	0.204268
ITA	0.16167	0.160849	0.033009	0.119841	0.208481	0.0973764	0.260532
SYR	0.181659	0.178911	0.0352192	0.139243	0.226881	0.115473	0.318596
CHL	0.121958	0.117502	0.0263703	0.0934081	0.155106	0.0660595	0.204344
BEL	0.165178	0.161253	0.0311507	0.130492	0.206714	0.113287	0.27735
EST	0.142074	0.138321	0.025647	0.111511	0.178681	0.094738	0.206978
LBN	0.189932	0.184873	0.0372404	0.14979	0.241785	0.118563	0.318269
GIN	0.145451	0.142805	0.0288919	0.113404	0.184665	0.0827508	0.241038
BRN	0.132394	0.127457	0.0245522	0.102024	0.163775	0.0676511	0.195755
MNG	0.143387	0.137736	0.0284198	0.113525	0.18185	0.082396	0.219769
PRY	0.133463	0.12858	0.0285055	0.101142	0.163765	0.0847396	0.246532
USA	0.137881	0.133747	0.0291224	0.103902	0.177744	0.0731212	0.229533
RWA	0.126186	0.121526	0.0244998	0.0975631	0.15953	0.0761747	0.217715
PRK	0.1727	0.175039	0.0298945	0.137898	0.214185	0.0989544	0.246172
NGA	0.136188	0.132959	0.0286749	0.102674	0.164867	0.0827027	0.225851
BWA	0.112853	0.108666	0.0248967	0.0849617	0.148809	0.0616034	0.1752
NOR	0.193895	0.189286	0.0405239	0.148827	0.252191	0.117874	0.324935
BIH	0.190822	0.185021	0.0425764	0.137867	0.257642	0.0939323	0.29696
BOL	0.176695	0.175153	0.0328057	0.138759	0.215182	0.108341	0.286016
AZE	0.148639	0.143094	0.029556	0.117668	0.190794	0.0846167	0.241812
BLR	0.208923	0.203283	0.0396621	0.169871	0.253444	0.121605	0.36187
KOR	0.143589	0.137044	0.0286985	0.113877	0.177455	0.0991777	0.273133
RUS	0.141097	0.139209	0.0299722	0.103867	0.172802	0.0871759	0.242901
PER	0.136858	0.134164	0.029035	0.104381	0.176427	0.0828991	0.250148
VNM	0.12914	0.127029	0.0237482	0.101751	0.160291	0.0850231	0.211448
PSE	0.190046	0.187305	0.0364229	0.144762	0.24063	0.115976	0.2802
TUN	0.152103	0.147881	0.0286689	0.118133	0.185718	0.0937886	0.219335
NLD	0.156403	0.150007	0.0335015	0.116025	0.206048	0.0952159	0.286958
GTM	0.142525	0.137857	0.0267915	0.112717	0.173607	0.0939892	0.246527
URY	0.115303	0.114174	0.0204631	0.0910331	0.136118	0.0797044	0.193557
HRV	0.160374	0.154444	0.0332755	0.122351	0.198971	0.104096	0.294807
IDN	0.139448	0.137915	0.0296345	0.103854	0.17243	0.0810239	0.255061
LAO	0.157245	0.153443	0.0317832	0.120495	0.200198	0.0992827	0.27191
GUY	0.138167	0.133913	0.0274302	0.103737	0.176707	0.0862085	0.218419
SLB	0.145032	0.141928	0.0310658	0.105691	0.183357	0.0951118	0.249248
ISL	0.207015	0.204682	0.04747	0.155942	0.263721	0.0948086	0.380285
MOZ	0.146035	0.143502	0.0269127	0.113111	0.179377	0.0990259	0.225702
MLI	0.131802	0.126843	0.0267293	0.102218	0.16845	0.0737012	0.217982
PHL	0.125964	0.122122	0.0315451	0.0912563	0.161962	0.0675367	0.243367
CAN	0.141222	0.138068	0.0280936	0.106873	0.180686	0.0800973	0.233174
CMR	0.140034	0.137607	0.0281229	0.106219	0.17585	0.0859086	0.229081
FJI	0.141313	0.139646	0.0286095	0.105451	0.180279	0.0925746	0.218905
CIV	0.125861	0.120064	0.0276389	0.0977844	0.157225	0.0805699	0.268757
TUR	0.199822	0.192991	0.0460761	0.153022	0.257435	0.110678	0.368972
LBR	0.147849	0.141889	0.0288349	0.119006	0.181463	0.082108	0.245934
BEN	0.126972	0.126311	0.027694	0.0962431	0.163491	0.0741114	0.212793

## Sheet: Stats_DAC
	mean	median	std	p10	p90	min	max
CHE	0.470401	0.448688	0.100456	0.355242	0.596518	0.298154	0.735151
SLV	0.319057	0.313447	0.0680096	0.244976	0.386427	0.168227	0.597183
ARG	0.30671	0.293045	0.0642315	0.233364	0.392783	0.188569	0.52956
PAN	0.295775	0.286771	0.0724104	0.213578	0.391435	0.184017	0.512913
UKR	0.359228	0.343502	0.0714579	0.275225	0.457482	0.224103	0.572056
GEO	0.283236	0.274168	0.0716819	0.206398	0.368554	0.160833	0.622085
CUB	0.338739	0.324205	0.0797491	0.237848	0.442951	0.199971	0.570441
ECU	0.345463	0.337197	0.0709689	0.252019	0.434215	0.22326	0.612598
DEU	0.371963	0.364055	0.0694851	0.295877	0.462751	0.229937	0.614806
BFA	0.237597	0.225881	0.0470683	0.182776	0.298458	0.141923	0.367262
MDG	0.230313	0.22709	0.0523868	0.165138	0.3023	0.115433	0.350935
KGZ	0.304675	0.300464	0.0731595	0.20331	0.410043	0.155351	0.475391
IRQ	0.286767	0.278055	0.0665615	0.2189	0.3716	0.17275	0.54241
SOM	0.267489	0.260219	0.0565246	0.194062	0.344877	0.169416	0.425076
NAM	0.250588	0.245005	0.0550724	0.184908	0.315692	0.143429	0.409067
ARE	0.272899	0.261194	0.0619918	0.211686	0.341083	0.163389	0.482498
HUN	0.33828	0.331818	0.0725811	0.248569	0.428806	0.199728	0.564493
SEN	0.227416	0.229391	0.0486416	0.164586	0.28354	0.130036	0.34221
LBY	0.256981	0.255494	0.0645915	0.178241	0.334953	0.123618	0.500314
SDN	0.303262	0.297992	0.0672575	0.219385	0.409586	0.181311	0.488863
MYS	0.287571	0.2809	0.0689663	0.215473	0.375493	0.159909	0.503533
SUR	0.290824	0.28616	0.0687033	0.214792	0.383848	0.150441	0.537184
BLZ	0.327475	0.324483	0.0655698	0.244934	0.415991	0.199031	0.49302
SVN	0.392707	0.376293	0.0779364	0.309075	0.493258	0.233344	0.677137
CZE	0.329266	0.319019	0.0870699	0.235131	0.421488	0.184278	0.682144
IRN	0.272198	0.266831	0.0562509	0.202656	0.343819	0.143809	0.454374
SLE	0.275607	0.266255	0.0610534	0.205445	0.370112	0.147761	0.432763
JOR	0.272731	0.260812	0.0654075	0.200718	0.361243	0.172895	0.572669
LTU	0.338379	0.34256	0.0712797	0.254498	0.419703	0.175011	0.608233
SWE	0.313342	0.311732	0.0767501	0.216432	0.401783	0.145961	0.569393
POL	0.347252	0.335557	0.0859942	0.239374	0.451497	0.172699	0.628257
TZA	0.243492	0.231709	0.052	0.18666	0.3078	0.144904	0.466716
VEN	0.403965	0.387908	0.0903293	0.306339	0.512188	0.246591	0.707739
KEN	0.259636	0.255019	0.0582344	0.18661	0.332616	0.14856	0.415382
SVK	0.343729	0.33811	0.0725418	0.253675	0.435236	0.195536	0.52673
GBR	0.35928	0.354316	0.0735558	0.270327	0.448605	0.232261	0.5628
MAR	0.271913	0.26373	0.0556856	0.204192	0.351046	0.165596	0.43491
AGO	0.249782	0.239651	0.0552405	0.191994	0.310682	0.125983	0.500169
KWT	0.246826	0.231759	0.0642231	0.168063	0.334688	0.141022	0.453823
UGA	0.256597	0.242654	0.0633982	0.185884	0.34324	0.165511	0.459124
KHM	0.266371	0.261588	0.0708861	0.176551	0.349387	0.140987	0.530635
COD	0.252141	0.237357	0.0630597	0.193091	0.334695	0.14884	0.545256
QAT	0.246804	0.241783	0.0584601	0.175834	0.311932	0.153587	0.529501
BGD	0.275089	0.264955	0.0684441	0.206643	0.358059	0.1717	0.616959
GRC	0.360508	0.352421	0.0795443	0.265163	0.463505	0.224427	0.570402
IND	0.332323	0.338645	0.0787575	0.243089	0.436624	0.155244	0.547389
MDA	0.335545	0.326523	0.0774005	0.247211	0.45089	0.197125	0.601642
GAB	0.290951	0.280779	0.065897	0.223254	0.373232	0.156775	0.515631
MWI	0.243974	0.241172	0.0519978	0.180279	0.300796	0.147747	0.393164
EGY	0.299849	0.300619	0.0584305	0.225022	0.381716	0.17518	0.431891
MNE	0.388917	0.385969	0.0970672	0.289017	0.504015	0.205344	0.742345
ZAF	0.239194	0.226896	0.0592822	0.176759	0.318842	0.145568	0.439497
MKD	0.37651	0.360489	0.0962491	0.265208	0.477092	0.223065	0.70776
BHS	0.280481	0.27277	0.0570041	0.21554	0.355529	0.182867	0.452833
ZWE	0.250073	0.245907	0.0622793	0.17889	0.32241	0.131808	0.501563
IRL	0.361086	0.352049	0.0672868	0.280607	0.451878	0.244202	0.549138
LKA	0.297513	0.283121	0.0672495	0.219518	0.398874	0.165612	0.466776
SRB	0.38474	0.364594	0.0936628	0.280284	0.511433	0.184054	0.675159
COG	0.281828	0.267569	0.0680141	0.210163	0.375519	0.187446	0.54745
NZL	0.325461	0.317433	0.0637803	0.249505	0.413983	0.204441	0.477987
LVA	0.328133	0.32358	0.0742643	0.245543	0.440249	0.161242	0.531405
AUS	0.32939	0.327582	0.0590762	0.250307	0.397608	0.181806	0.46418
FLK	0.363485	0.356722	0.0853772	0.266056	0.470061	0.222886	0.663661
ISR	0.291742	0.282169	0.064851	0.22236	0.363002	0.162405	0.545189
COL	0.277874	0.268288	0.0656662	0.201107	0.35356	0.153824	0.477661
FIN	0.412837	0.388327	0.0971097	0.298898	0.533614	0.259549	0.747096
GMB	0.225668	0.219757	0.0535777	0.165774	0.301302	0.142175	0.401359
PRT	0.340909	0.339578	0.0757689	0.242637	0.441265	0.146163	0.538983
SAU	0.30352	0.298501	0.0557448	0.23256	0.372198	0.172713	0.471605
PNG	0.289161	0.281533	0.0783708	0.202457	0.382709	0.153802	0.543634
JAM	0.297831	0.287212	0.0757187	0.21769	0.390649	0.169266	0.579734
PAK	0.304966	0.289873	0.0757034	0.223889	0.402242	0.186082	0.627978
ZMB	0.268084	0.261583	0.0621014	0.201101	0.354512	0.140369	0.448901
CHN	0.274081	0.26575	0.0706704	0.198002	0.364426	0.138608	0.548407
KAZ	0.306134	0.293614	0.0799943	0.217538	0.416159	0.177673	0.593574
ARM	0.314636	0.323015	0.0741998	0.22142	0.412671	0.154882	0.511173
LUX	0.371337	0.359395	0.0718077	0.288267	0.47309	0.252808	0.559527
ALB	0.389456	0.374369	0.108715	0.276507	0.496793	0.218286	1.01482
HND	0.31104	0.302763	0.0640248	0.230383	0.394494	0.20629	0.520819
NIC	0.309703	0.298895	0.0653206	0.230021	0.400179	0.178469	0.513722
NER	0.24527	0.23855	0.0526724	0.194239	0.302813	0.156736	0.478662
ETH	0.291802	0.286955	0.0554874	0.222397	0.368898	0.161718	0.429657
GRL	0.408623	0.395387	0.107151	0.276561	0.537633	0.200466	0.844734
OMN	0.305913	0.292327	0.069166	0.219822	0.395977	0.148185	0.516135
ESP	0.361403	0.351451	0.0732836	0.270794	0.451066	0.213736	0.623706
TJK	0.301927	0.293221	0.0646067	0.224275	0.37779	0.169398	0.48606
YEM	0.315842	0.309449	0.0701243	0.242428	0.417584	0.193465	0.521206
THA	0.262206	0.25518	0.0504859	0.199923	0.334673	0.168193	0.372667
UZB	0.292721	0.28388	0.0730546	0.211615	0.378454	0.127598	0.50857
DZA	0.257369	0.263523	0.0560796	0.183296	0.330642	0.125474	0.393711
FRA	0.343333	0.334926	0.0776477	0.254787	0.449967	0.224107	0.58114
CRI	0.321728	0.312345	0.0763466	0.23244	0.430964	0.194374	0.533133
AUT	0.3046	0.292148	0.0810412	0.20598	0.41356	0.176215	0.649838
GHA	0.273005	0.259285	0.0524992	0.211189	0.340391	0.183265	0.435327
MEX	0.271437	0.260438	0.0611264	0.197873	0.363867	0.165904	0.445788
HTI	0.307144	0.302078	0.0697562	0.217554	0.392617	0.160876	0.490788
JPN	0.475434	0.464811	0.114972	0.349646	0.621673	0.181765	0.789187
NPL	0.268393	0.266486	0.0557521	0.198505	0.333339	0.159312	0.443546
BGR	0.353743	0.330655	0.0803786	0.26371	0.468244	0.170771	0.625601
DNK	0.32808	0.319874	0.0665741	0.238199	0.399728	0.206599	0.525845
MMR	0.287624	0.270586	0.0699321	0.209244	0.368479	0.149562	0.526989
SWZ	0.233109	0.221914	0.0522945	0.171536	0.307824	0.134402	0.403705
CYP	0.365001	0.348872	0.0883105	0.267795	0.486657	0.200315	0.615396
ROU	0.382602	0.356546	0.0898595	0.283296	0.518488	0.254226	0.672428
DOM	0.296092	0.284376	0.0665827	0.223302	0.381919	0.154221	0.498184
BRA	0.269128	0.261322	0.0671854	0.191851	0.371714	0.136794	0.487887
ITA	0.346466	0.339354	0.0791909	0.257636	0.440566	0.164523	0.648338
SYR	0.299382	0.290264	0.0661167	0.222194	0.38762	0.200598	0.51226
CHL	0.246153	0.234618	0.0560508	0.188654	0.307907	0.159695	0.474566
BEL	0.360654	0.361917	0.0717925	0.267466	0.447938	0.239645	0.610965
EST	0.322564	0.315814	0.0777309	0.235891	0.436325	0.156051	0.565648
LBN	0.337716	0.321867	0.0755239	0.257317	0.430502	0.157393	0.573668
GIN	0.273299	0.272719	0.0608584	0.199324	0.36272	0.155804	0.418095
BRN	0.271712	0.264582	0.0582926	0.200547	0.340384	0.151472	0.454771
MNG	0.281066	0.273112	0.0586855	0.213379	0.359818	0.176015	0.429099
PRY	0.26793	0.254898	0.0613805	0.201559	0.350175	0.151172	0.511345
USA	0.305178	0.297939	0.0758237	0.21757	0.391233	0.156775	0.573202
RWA	0.254344	0.247494	0.0667536	0.180535	0.342844	0.164454	0.477787
PRK	0.317862	0.310268	0.0656786	0.238297	0.405453	0.197455	0.566534
NGA	0.250672	0.250299	0.0538803	0.186157	0.327246	0.136041	0.38641
BWA	0.217427	0.207149	0.0561152	0.161879	0.268538	0.114261	0.480948
NOR	0.435275	0.421194	0.0840368	0.343547	0.541212	0.252056	0.717233
BIH	0.406664	0.402089	0.0822022	0.306819	0.519774	0.229904	0.65057
BOL	0.331383	0.321733	0.0710543	0.262608	0.402669	0.175069	0.591826
AZE	0.323774	0.311477	0.0771247	0.228801	0.433806	0.149676	0.553178
BLR	0.389807	0.388408	0.0825658	0.27661	0.499312	0.238378	0.607411
KOR	0.311186	0.305512	0.0632717	0.240277	0.38948	0.189132	0.506516
RUS	0.322462	0.303425	0.0891445	0.229813	0.419535	0.167758	0.73335
PER	0.285445	0.274789	0.0771587	0.199067	0.394436	0.164894	0.584553
VNM	0.259624	0.253161	0.0548357	0.196465	0.334933	0.140662	0.421534
PSE	0.326155	0.311857	0.0813138	0.24091	0.40211	0.205931	0.791834
TUN	0.286668	0.279262	0.0627698	0.219866	0.363155	0.159636	0.525383
NLD	0.353735	0.347024	0.0794131	0.258038	0.460859	0.224646	0.660896
GTM	0.293288	0.279714	0.0726583	0.220879	0.394183	0.14543	0.563954
URY	0.24606	0.234999	0.0566116	0.186179	0.318991	0.134637	0.489516
HRV	0.351701	0.334169	0.077444	0.270129	0.464376	0.235585	0.616423
IDN	0.276206	0.262496	0.0627972	0.204518	0.363854	0.161669	0.477346
LAO	0.293702	0.278505	0.0688213	0.221867	0.376733	0.17457	0.576723
GUY	0.296642	0.290804	0.0643286	0.219478	0.384882	0.176312	0.482871
SLB	0.298777	0.291788	0.0756062	0.212164	0.385939	0.145945	0.618834
ISL	0.464853	0.465419	0.0985358	0.352926	0.576299	0.285263	0.802094
MOZ	0.258856	0.25142	0.0515082	0.202352	0.332461	0.152245	0.386713
MLI	0.235532	0.229032	0.0426173	0.179332	0.292028	0.146417	0.333
PHL	0.267598	0.252993	0.0685448	0.198497	0.360305	0.141075	0.477489
CAN	0.321153	0.304705	0.0731379	0.236538	0.42458	0.200743	0.521406
CMR	0.256552	0.251466	0.0511289	0.198186	0.326686	0.162304	0.414618
FJI	0.296447	0.292802	0.074463	0.209414	0.384245	0.153259	0.501522
CIV	0.250877	0.24072	0.0621957	0.192674	0.318737	0.116686	0.521846
TUR	0.428155	0.400014	0.104571	0.308626	0.555633	0.259604	0.796438
LBR	0.274191	0.265523	0.0741027	0.201019	0.359498	0.139053	0.540417
BEN	0.250383	0.240671	0.0575569	0.183805	0.339481	0.151345	0.396297

## Sheet: Stats_AD
	mean	median	std	p10	p90	min	max
CHE	0.150168	0.147833	0.019667	0.127408	0.173856	0.113403	0.199838
SLV	0.11588	0.113195	0.014753	0.0990508	0.136426	0.081525	0.156202
ARG	0.114387	0.112475	0.0171119	0.0929087	0.137654	0.0827016	0.168225
PAN	0.105217	0.103414	0.0120989	0.0913587	0.124005	0.0801625	0.134022
UKR	0.143959	0.141688	0.0185004	0.119553	0.170145	0.104779	0.187656
GEO	0.0949714	0.0934193	0.011938	0.0819419	0.112156	0.0747478	0.127822
CUB	0.13932	0.136382	0.0193976	0.116714	0.166716	0.0960606	0.189723
ECU	0.114878	0.111307	0.0173019	0.0958194	0.13842	0.0792887	0.163669
DEU	0.146333	0.14491	0.0167716	0.126797	0.167925	0.116527	0.189754
BFA	0.0937894	0.0914773	0.0145193	0.077758	0.115437	0.0673316	0.141103
MDG	0.0849265	0.083282	0.0119133	0.070352	0.100757	0.052881	0.123374
KGZ	0.106415	0.104976	0.0130297	0.0913153	0.124062	0.0760214	0.14353
IRQ	0.118237	0.117228	0.0142622	0.100015	0.137667	0.0923245	0.159033
SOM	0.109929	0.110623	0.0165439	0.0904048	0.131053	0.0743479	0.154227
NAM	0.0895498	0.0872996	0.012768	0.0750122	0.108345	0.0694841	0.127267
ARE	0.103295	0.101604	0.0115557	0.0890542	0.118295	0.0805153	0.136186
HUN	0.113667	0.111985	0.012582	0.0981444	0.129784	0.0817548	0.152393
SEN	0.0682748	0.0677876	0.0107317	0.0557116	0.081726	0.0468702	0.0987567
LBY	0.0785881	0.077615	0.00930957	0.0672	0.0916914	0.0623195	0.103132
SDN	0.126535	0.126336	0.0226699	0.096556	0.154012	0.0817568	0.189905
MYS	0.0747675	0.0735223	0.0104222	0.0618331	0.0897821	0.0553743	0.103312
SUR	0.0946261	0.0949029	0.0141786	0.0766809	0.112802	0.0629868	0.126647
BLZ	0.123362	0.120843	0.0161487	0.104046	0.146473	0.0922787	0.166855
SVN	0.138534	0.137125	0.0150602	0.122	0.158259	0.109156	0.179176
CZE	0.100131	0.0970206	0.0123996	0.0851382	0.120135	0.0797228	0.137785
IRN	0.112089	0.109348	0.0141182	0.0947515	0.130503	0.0805443	0.154091
SLE	0.0977949	0.0949928	0.0145535	0.0808603	0.116463	0.0701956	0.148651
JOR	0.104635	0.102807	0.0137348	0.0883201	0.120457	0.0838826	0.148302
LTU	0.115513	0.112697	0.012864	0.100224	0.132815	0.0876291	0.154886
SWE	0.104909	0.103402	0.0111351	0.0913947	0.119867	0.086341	0.140045
POL	0.122602	0.120985	0.0157412	0.10508	0.141297	0.0897084	0.176277
TZA	0.0837622	0.0821444	0.0111945	0.070319	0.0982326	0.0629305	0.114961
VEN	0.144191	0.140594	0.0247253	0.112453	0.176049	0.100062	0.22589
KEN	0.125386	0.123444	0.0151209	0.105778	0.145299	0.0923766	0.165235
SVK	0.12387	0.120634	0.0138253	0.106791	0.141355	0.096584	0.162203
GBR	0.156319	0.154585	0.0171894	0.1365	0.178539	0.124662	0.20917
MAR	0.0852237	0.0841927	0.00917436	0.074311	0.0996315	0.0666798	0.106952
AGO	0.0919769	0.0901141	0.0130012	0.0762938	0.109754	0.065148	0.119412
KWT	0.0900627	0.0888968	0.0102179	0.0782537	0.104272	0.0689351	0.124868
UGA	0.0765803	0.0765716	0.0129819	0.0603303	0.0950357	0.0502974	0.126928
KHM	0.0998807	0.0992137	0.0117775	0.085341	0.114636	0.0701499	0.131968
COD	0.105228	0.104185	0.0128386	0.0896383	0.121044	0.0776504	0.136876
QAT	0.0888467	0.0880372	0.00921734	0.0772431	0.102126	0.0712856	0.115908
BGD	0.105961	0.103176	0.0148843	0.0895206	0.126966	0.0760599	0.145401
GRC	0.130661	0.129278	0.0145089	0.113083	0.148907	0.102621	0.16735
IND	0.0827654	0.0808533	0.010444	0.0706506	0.0986931	0.0593437	0.109441
MDA	0.120793	0.119207	0.0158471	0.101567	0.144113	0.0900617	0.155883
GAB	0.112468	0.109582	0.0163392	0.0939982	0.133555	0.0744589	0.163118
MWI	0.0980275	0.0968289	0.0159193	0.0788461	0.119819	0.0618362	0.143246
EGY	0.0968297	0.0956019	0.0147896	0.0798738	0.120325	0.0616738	0.136485
MNE	0.12289	0.119283	0.0155329	0.103692	0.150088	0.0983637	0.1588
ZAF	0.0833276	0.0828972	0.00983591	0.0700956	0.097139	0.0601034	0.107539
MKD	0.114471	0.113431	0.0146872	0.0973377	0.134034	0.0866167	0.158388
BHS	0.111644	0.108914	0.0147038	0.0953888	0.13085	0.0819319	0.14727
ZWE	0.0981437	0.0938528	0.0164959	0.0799063	0.126271	0.0712475	0.139531
IRL	0.143815	0.143271	0.0162696	0.123193	0.166026	0.110557	0.203615
LKA	0.126971	0.126616	0.0185876	0.104611	0.149249	0.0848923	0.190928
SRB	0.11708	0.116379	0.012648	0.0996677	0.133695	0.091916	0.143425
COG	0.104329	0.101734	0.0152805	0.0863861	0.125541	0.0746989	0.148039
NZL	0.123853	0.121783	0.0157368	0.106376	0.146781	0.0922919	0.161943
LVA	0.122661	0.1211	0.0138851	0.107912	0.140674	0.0955015	0.164785
AUS	0.125441	0.123794	0.0155081	0.104692	0.146277	0.10024	0.165756
FLK	0.111968	0.110499	0.0138448	0.0946481	0.128259	0.0867781	0.168048
ISR	0.111164	0.110085	0.0128304	0.0964657	0.130192	0.0840677	0.14212
COL	0.080879	0.0789828	0.0103757	0.0696084	0.0951067	0.0598542	0.113512
FIN	0.130831	0.127372	0.0155808	0.112376	0.153277	0.104756	0.184903
GMB	0.0793509	0.0802101	0.0111347	0.0640067	0.0955657	0.0591567	0.108139
PRT	0.128039	0.126228	0.0147972	0.111637	0.148274	0.0967134	0.168669
SAU	0.118346	0.117875	0.0133136	0.102589	0.13537	0.0926467	0.153504
PNG	0.10458	0.103563	0.0140049	0.0888118	0.127212	0.0762767	0.138523
JAM	0.10862	0.106939	0.0136791	0.091648	0.124462	0.0815286	0.150224
PAK	0.121764	0.119392	0.0162417	0.0998991	0.144448	0.0896313	0.16399
ZMB	0.0961653	0.0946466	0.0151299	0.080564	0.113316	0.0607554	0.155167
CHN	0.071215	0.0707527	0.00696821	0.0630458	0.0807088	0.0573494	0.0911423
KAZ	0.0969088	0.0963892	0.00977793	0.0852423	0.108665	0.0766799	0.128641
ARM	0.103741	0.102658	0.0116956	0.0881284	0.119076	0.0797023	0.137015
LUX	0.143181	0.141125	0.0174259	0.123743	0.163638	0.114139	0.210408
ALB	0.113761	0.114747	0.0134365	0.0977305	0.131943	0.0871853	0.146562
HND	0.113885	0.112752	0.0146612	0.0957303	0.133485	0.0860851	0.151958
NIC	0.0863011	0.0833042	0.0141764	0.0694436	0.108425	0.0615298	0.121045
NER	0.100773	0.0993117	0.0166829	0.0810668	0.12399	0.0709661	0.142501
ETH	0.113208	0.111893	0.0147035	0.0948614	0.130936	0.0842331	0.157017
GRL	0.108087	0.107539	0.012188	0.0917711	0.12347	0.0838608	0.140708
OMN	0.117277	0.11657	0.0131004	0.10067	0.136712	0.0878544	0.152233
ESP	0.148366	0.145546	0.0157437	0.130158	0.172223	0.115758	0.193262
TJK	0.106864	0.105194	0.0143127	0.0902611	0.124804	0.0822941	0.164869
YEM	0.133581	0.133348	0.0193629	0.110846	0.159386	0.099176	0.185905
THA	0.0771413	0.0754746	0.0104497	0.0659774	0.0916087	0.0564719	0.104057
UZB	0.102555	0.101212	0.0124175	0.087535	0.116244	0.0803386	0.156414
DZA	0.0831253	0.0822601	0.00980854	0.0715872	0.0961084	0.0625712	0.11565
FRA	0.155981	0.152513	0.0158526	0.137689	0.179967	0.126259	0.202652
CRI	0.113107	0.112657	0.013812	0.0953544	0.132424	0.0881026	0.155878
AUT	0.121724	0.11941	0.0127221	0.106989	0.13753	0.097343	0.152098
GHA	0.105141	0.104161	0.0149653	0.0871976	0.122675	0.0762567	0.157999
MEX	0.0755413	0.0749192	0.00858342	0.0641802	0.087695	0.0603846	0.0999977
HTI	0.121992	0.122727	0.0174101	0.100109	0.143459	0.0801181	0.164904
JPN	0.177748	0.175356	0.0176324	0.156853	0.20386	0.140759	0.223632
NPL	0.101875	0.103042	0.0110697	0.0868894	0.114186	0.0774107	0.129345
BGR	0.122625	0.121167	0.013949	0.106462	0.138908	0.0980061	0.175396
DNK	0.154502	0.152082	0.0157255	0.136469	0.172314	0.122826	0.197988
MMR	0.119253	0.117335	0.0168712	0.099045	0.143429	0.0902044	0.173849
SWZ	0.083248	0.0812673	0.0125115	0.0683817	0.0998719	0.0582401	0.114684
CYP	0.131382	0.130394	0.0151925	0.113868	0.150541	0.100346	0.184771
ROU	0.133616	0.132704	0.0140089	0.11565	0.151287	0.10405	0.173424
DOM	0.108386	0.107107	0.0125061	0.0930253	0.126603	0.0812315	0.139665
BRA	0.0802097	0.0795617	0.00964104	0.0686007	0.092334	0.0591192	0.105079
ITA	0.114767	0.113256	0.0132664	0.0985848	0.130412	0.0904281	0.150972
SYR	0.141957	0.141003	0.0229637	0.115082	0.171878	0.0998078	0.224354
CHL	0.0801252	0.0796471	0.00935473	0.0695569	0.0920281	0.062193	0.109177
BEL	0.141763	0.139601	0.0166925	0.123748	0.166254	0.111668	0.188086
EST	0.119391	0.119429	0.0124887	0.10429	0.134306	0.0925798	0.153683
LBN	0.150094	0.149511	0.0236886	0.121623	0.17838	0.103396	0.224947
GIN	0.0983197	0.0969355	0.0137553	0.0819763	0.117676	0.0693048	0.136351
BRN	0.0979781	0.0976927	0.0109641	0.0842209	0.113235	0.0743834	0.125377
MNG	0.109132	0.107961	0.0136584	0.0921789	0.128639	0.0788644	0.148692
PRY	0.0854313	0.0847947	0.0104759	0.0729048	0.100505	0.0655458	0.109294
USA	0.110245	0.108725	0.0122149	0.0962066	0.126897	0.0847545	0.145676
RWA	0.0844418	0.0845112	0.0119806	0.0703187	0.100277	0.0594676	0.111765
PRK	0.135261	0.131308	0.0210668	0.110107	0.164979	0.0921468	0.187594
NGA	0.0944744	0.0924483	0.0147981	0.0782041	0.11384	0.0659154	0.132286
BWA	0.0727981	0.0712481	0.00910094	0.0619934	0.0858993	0.0570998	0.0959263
NOR	0.139494	0.138309	0.0183534	0.119225	0.162669	0.100444	0.205537
BIH	0.126285	0.126177	0.0174539	0.10449	0.151014	0.091273	0.183323
BOL	0.115108	0.115029	0.0154222	0.0940222	0.135	0.0792461	0.147116
AZE	0.107327	0.105219	0.0131441	0.0928627	0.126365	0.0833867	0.141891
BLR	0.157665	0.152636	0.0232402	0.130726	0.190398	0.104277	0.219259
KOR	0.11045	0.109116	0.0144937	0.0931244	0.130152	0.0855385	0.165283
RUS	0.10365	0.103619	0.0127184	0.0872676	0.118898	0.0737755	0.137014
PER	0.079155	0.0791919	0.0105233	0.0655979	0.0937138	0.0588993	0.111321
VNM	0.0953552	0.0943633	0.0125642	0.079192	0.112453	0.0723952	0.13568
PSE	0.158477	0.155164	0.0242309	0.13102	0.191164	0.104134	0.23316
TUN	0.103513	0.101961	0.0151518	0.085021	0.12307	0.0741997	0.151123
NLD	0.136928	0.137865	0.0155965	0.116717	0.157262	0.10582	0.182499
GTM	0.108791	0.107984	0.0123147	0.0927398	0.125893	0.0814455	0.136101
URY	0.0784167	0.0780827	0.00845614	0.0669206	0.0904918	0.0573029	0.102257
HRV	0.126131	0.125248	0.0137582	0.110433	0.143514	0.0958729	0.183789
IDN	0.0945818	0.0944304	0.0110684	0.082609	0.108545	0.0728686	0.124153
LAO	0.120076	0.120137	0.0152875	0.0994368	0.139814	0.0864006	0.171777
GUY	0.0798961	0.0805203	0.00981945	0.0669591	0.0918097	0.0606159	0.107015
SLB	0.111572	0.111724	0.015909	0.09129	0.128504	0.0787259	0.159314
ISL	0.136278	0.132607	0.0164917	0.118654	0.156674	0.1023	0.181632
MOZ	0.0963505	0.0944595	0.0149199	0.0778743	0.118025	0.0684004	0.136828
MLI	0.0984557	0.0978494	0.0134724	0.082782	0.117895	0.071198	0.136541
PHL	0.0872446	0.0884831	0.0106812	0.0732234	0.101406	0.0670296	0.110813
CAN	0.131022	0.129229	0.0146959	0.11381	0.148597	0.0987804	0.184195
CMR	0.092521	0.0925973	0.0116197	0.0772342	0.106752	0.0669243	0.124996
FJI	0.113425	0.111583	0.0155074	0.0966579	0.133985	0.0832221	0.151242
CIV	0.0808065	0.0802495	0.00926451	0.0704198	0.0929316	0.06146	0.104685
TUR	0.132483	0.131138	0.0147801	0.116782	0.151651	0.0961647	0.17297
LBR	0.0973918	0.0945327	0.0149287	0.0809387	0.119514	0.0709216	0.148829
BEN	0.0847413	0.0834951	0.0119676	0.0695312	0.10125	0.0631269	0.116261

## Sheet: Stats_AE
	mean	median	std	p10	p90	min	max
CHE	0.152431	0.14411	0.0377404	0.114775	0.208423	0.0843677	0.274452
SLV	0.123854	0.120618	0.0272845	0.0929086	0.163033	0.0735097	0.207368
ARG	0.133462	0.130892	0.0273656	0.0987274	0.171604	0.0712428	0.19789
PAN	0.112843	0.106408	0.0292242	0.0819663	0.150952	0.0601167	0.206725
UKR	0.141667	0.135894	0.0264477	0.112387	0.180769	0.0818203	0.223345
GEO	0.115288	0.113938	0.0252889	0.0846399	0.148789	0.0642745	0.182952
CUB	0.141293	0.138224	0.0289004	0.108073	0.179022	0.0879826	0.226225
ECU	0.134824	0.132538	0.0297567	0.0983439	0.171759	0.0732599	0.242725
DEU	0.119297	0.114422	0.026166	0.0922515	0.157339	0.0665315	0.198286
BFA	0.106357	0.104144	0.0216161	0.0770225	0.136934	0.0639693	0.176031
MDG	0.0949272	0.0942846	0.0210722	0.0723742	0.118412	0.0573788	0.172666
KGZ	0.127382	0.127551	0.0275422	0.0935268	0.156691	0.0845855	0.248269
IRQ	0.117676	0.118413	0.0243354	0.0864928	0.146645	0.0662952	0.183787
SOM	0.108675	0.106834	0.0217069	0.0806069	0.139093	0.0692206	0.167495
NAM	0.0952519	0.0927812	0.0189073	0.071582	0.117519	0.0616687	0.157993
ARE	0.0983854	0.0957321	0.0221931	0.0716883	0.131131	0.0644835	0.161379
HUN	0.121122	0.119599	0.027023	0.0901983	0.157685	0.0722268	0.206898
SEN	0.0920626	0.091547	0.0187683	0.0678283	0.118507	0.0504422	0.133931
LBY	0.0952843	0.0937705	0.0203341	0.0728049	0.12298	0.054184	0.165216
SDN	0.137171	0.13625	0.0269958	0.104513	0.171559	0.0758001	0.201711
MYS	0.105938	0.102869	0.0217234	0.0784871	0.134214	0.05891	0.154284
SUR	0.125327	0.117823	0.0321605	0.0920691	0.159859	0.0754272	0.248639
BLZ	0.127551	0.124839	0.0246403	0.0994916	0.157395	0.077848	0.222687
SVN	0.132057	0.130528	0.0261544	0.100401	0.166513	0.0786406	0.209227
CZE	0.116634	0.114122	0.0260495	0.0879369	0.157695	0.0700918	0.188133
IRN	0.116352	0.109508	0.0275724	0.0884837	0.15169	0.052737	0.206722
SLE	0.11351	0.110466	0.026158	0.0863054	0.146391	0.0690096	0.229159
JOR	0.107733	0.105326	0.0216577	0.0841952	0.133317	0.0633467	0.189106
LTU	0.120221	0.118766	0.0271809	0.092001	0.151278	0.0688333	0.209123
SWE	0.117408	0.114182	0.0283783	0.0865282	0.148861	0.0747167	0.216559
POL	0.121261	0.116188	0.0264883	0.0971057	0.150363	0.0716824	0.2249
TZA	0.102347	0.102998	0.0227332	0.0768644	0.127642	0.0576642	0.209354
VEN	0.165786	0.160393	0.0397414	0.127329	0.218317	0.112389	0.393595
KEN	0.10562	0.103524	0.0216042	0.0812038	0.131179	0.0527226	0.164921
SVK	0.127088	0.124427	0.0270841	0.0943662	0.1618	0.0753169	0.211326
GBR	0.121255	0.118604	0.0276989	0.0877426	0.160405	0.0680203	0.217092
MAR	0.100779	0.095549	0.0261883	0.0744441	0.135545	0.056486	0.177844
AGO	0.107798	0.106559	0.0219755	0.0841516	0.131853	0.0623599	0.19458
KWT	0.0948461	0.0926115	0.0201437	0.0733505	0.122602	0.0543035	0.162619
UGA	0.109166	0.105996	0.023413	0.0827665	0.148546	0.06968	0.176569
KHM	0.10952	0.10684	0.0226075	0.0854318	0.13922	0.0673255	0.192853
COD	0.110373	0.108957	0.0217822	0.0848482	0.138444	0.0637713	0.178686
QAT	0.0946558	0.0929478	0.0226081	0.0683669	0.125541	0.0461058	0.163199
BGD	0.113364	0.110899	0.0253085	0.0887986	0.140128	0.0694218	0.211314
GRC	0.1304	0.12705	0.030187	0.0974948	0.178847	0.0755849	0.209092
IND	0.126136	0.121422	0.0301932	0.0880133	0.170977	0.0634027	0.219898
MDA	0.131193	0.130431	0.0293625	0.0985324	0.162401	0.0852777	0.232233
GAB	0.118047	0.114383	0.0225578	0.0918079	0.15189	0.0784838	0.197147
MWI	0.107782	0.107792	0.0200782	0.0832661	0.134399	0.0656165	0.166491
EGY	0.112311	0.113236	0.0199982	0.0899638	0.142313	0.0682393	0.163462
MNE	0.15339	0.152934	0.0393202	0.107469	0.194154	0.0811474	0.305677
ZAF	0.0920831	0.0904813	0.0189154	0.0689482	0.117008	0.0479447	0.135398
MKD	0.142787	0.139864	0.0317044	0.102417	0.180016	0.0831718	0.259301
BHS	0.107724	0.104623	0.0229938	0.0830663	0.138112	0.0652293	0.196407
ZWE	0.114356	0.113109	0.0231836	0.0862172	0.145761	0.0586544	0.185566
IRL	0.115752	0.113205	0.0245961	0.0891764	0.145912	0.0657384	0.196662
LKA	0.129027	0.12671	0.0229695	0.0977168	0.16217	0.0813089	0.188231
SRB	0.140598	0.133797	0.033746	0.0962416	0.183687	0.0865118	0.236034
COG	0.118013	0.11751	0.0235339	0.0890904	0.142152	0.0730073	0.195725
NZL	0.105445	0.102171	0.0208774	0.0806706	0.128851	0.0594001	0.179374
LVA	0.12153	0.118569	0.0270083	0.0905601	0.157465	0.0726697	0.216464
AUS	0.105399	0.103182	0.0210279	0.0803522	0.139076	0.0558914	0.163174
FLK	0.13793	0.133712	0.0356312	0.100085	0.185744	0.0664666	0.270371
ISR	0.10121	0.0998269	0.0213374	0.0747956	0.128188	0.058654	0.171073
COL	0.104724	0.102737	0.0222632	0.0751477	0.134273	0.0679058	0.159096
FIN	0.151835	0.14378	0.0437107	0.111073	0.195916	0.0841318	0.354363
GMB	0.0926027	0.0905944	0.0164991	0.0715553	0.115526	0.0576271	0.141452
PRT	0.125269	0.119762	0.0323363	0.092081	0.169757	0.0729564	0.226413
SAU	0.103254	0.100042	0.0236177	0.0787826	0.13416	0.0643377	0.207586
PNG	0.111306	0.106162	0.0245663	0.0820911	0.144143	0.0640721	0.185092
JAM	0.114288	0.108868	0.0243337	0.086508	0.150063	0.0657925	0.180723
PAK	0.123127	0.12102	0.0231522	0.0952952	0.157907	0.0778095	0.18394
ZMB	0.109904	0.109623	0.0243244	0.0801275	0.144326	0.0650441	0.195328
CHN	0.101344	0.0990266	0.0244273	0.0728783	0.127615	0.0618451	0.206451
KAZ	0.117582	0.11209	0.0255876	0.0887074	0.150854	0.0675077	0.187928
ARM	0.11738	0.111272	0.0256107	0.0888159	0.150853	0.0677955	0.210191
LUX	0.123105	0.120829	0.0270629	0.0871998	0.156954	0.069114	0.187664
ALB	0.149055	0.141842	0.0382207	0.107696	0.195375	0.0879136	0.277094
HND	0.117545	0.11326	0.0254829	0.0856441	0.155799	0.0752085	0.181047
NIC	0.121734	0.120564	0.0235629	0.09322	0.154099	0.0763837	0.183595
NER	0.10507	0.100936	0.0225685	0.0817961	0.130846	0.0651116	0.199265
ETH	0.117666	0.117974	0.0239907	0.0885565	0.147946	0.0699316	0.206654
GRL	0.14976	0.143723	0.040865	0.101147	0.20827	0.0859665	0.30574
OMN	0.103323	0.101087	0.0193141	0.0825055	0.130937	0.0733089	0.182416
ESP	0.125115	0.120661	0.0265188	0.0925509	0.156665	0.0786688	0.19793
TJK	0.127791	0.120813	0.0303702	0.0950986	0.166539	0.0649149	0.217179
YEM	0.135413	0.131672	0.0309263	0.103608	0.171587	0.0764249	0.233625
THA	0.102747	0.101127	0.0243522	0.0711266	0.131914	0.0546196	0.177093
UZB	0.117123	0.114239	0.0258677	0.0870276	0.146575	0.0668134	0.212443
DZA	0.103096	0.099874	0.0215946	0.0790926	0.127753	0.0664753	0.193632
FRA	0.115986	0.110748	0.0272038	0.0859346	0.151525	0.0596076	0.200506
CRI	0.125346	0.122981	0.0310717	0.0904043	0.173711	0.061005	0.224853
AUT	0.121699	0.12038	0.0259929	0.0927875	0.151337	0.0675727	0.207988
GHA	0.11722	0.114407	0.0230763	0.0889185	0.147358	0.0743919	0.174582
MEX	0.104786	0.0996283	0.0255923	0.0733292	0.138027	0.06381	0.179935
HTI	0.130902	0.13181	0.0242818	0.101799	0.160206	0.0831701	0.200542
JPN	0.183584	0.175439	0.0440357	0.131365	0.243435	0.107657	0.288936
NPL	0.111063	0.107947	0.0239799	0.0869977	0.146145	0.0623922	0.173813
BGR	0.123813	0.120288	0.0279638	0.0879055	0.159864	0.0702821	0.197085
DNK	0.108753	0.104805	0.0231358	0.0819356	0.140788	0.0624314	0.188874
MMR	0.126133	0.125191	0.025753	0.0936053	0.156653	0.07026	0.196989
SWZ	0.0967077	0.0940471	0.0200037	0.0735177	0.122358	0.0572968	0.162333
CYP	0.132408	0.129048	0.0287114	0.095732	0.167766	0.0822945	0.202111
ROU	0.134086	0.129526	0.0315804	0.0966661	0.173158	0.0615312	0.23586
DOM	0.110665	0.108856	0.0221685	0.0871474	0.139145	0.0591873	0.170233
BRA	0.104425	0.102827	0.0213391	0.077534	0.131427	0.0591071	0.157682
ITA	0.12303	0.116437	0.0287439	0.088907	0.167422	0.0704609	0.204827
SYR	0.139394	0.141275	0.0279175	0.103202	0.173625	0.075196	0.208749
CHL	0.0946747	0.0912168	0.0224316	0.0721574	0.118381	0.0594991	0.189956
BEL	0.125175	0.120538	0.0253197	0.0964646	0.155551	0.0739919	0.218688
EST	0.120536	0.117555	0.0236463	0.0922317	0.15641	0.0771992	0.187841
LBN	0.14919	0.142119	0.0301865	0.114458	0.18881	0.0848461	0.234694
GIN	0.114299	0.114637	0.0225707	0.0872505	0.145385	0.0577523	0.180328
BRN	0.104367	0.0993804	0.0260451	0.0781756	0.135836	0.057327	0.195232
MNG	0.108292	0.10754	0.0205384	0.0829142	0.132595	0.0627013	0.166435
PRY	0.10149	0.0976311	0.0200895	0.0790887	0.127385	0.0575217	0.16775
USA	0.10729	0.102138	0.0218457	0.0826876	0.137919	0.0623411	0.172509
RWA	0.103034	0.103601	0.0226725	0.0750527	0.133477	0.058081	0.1596
PRK	0.131242	0.126961	0.0261821	0.101814	0.163346	0.0808677	0.223366
NGA	0.103537	0.101343	0.0222627	0.077828	0.131923	0.0615345	0.176575
BWA	0.0864496	0.0829899	0.0166596	0.0668057	0.112431	0.05735	0.13402
NOR	0.140354	0.133969	0.0316526	0.104297	0.187416	0.0921353	0.222616
BIH	0.161193	0.154163	0.0331758	0.123812	0.205782	0.0932386	0.287156
BOL	0.135191	0.132071	0.0278393	0.103153	0.17314	0.0871921	0.213956
AZE	0.117187	0.113699	0.0254598	0.0878501	0.148298	0.069897	0.200033
BLR	0.165121	0.164333	0.0295375	0.125905	0.204635	0.109655	0.244167
KOR	0.108608	0.105647	0.0215442	0.0835539	0.138003	0.0681846	0.177402
RUS	0.120701	0.11628	0.0244769	0.0911304	0.152913	0.0693775	0.193289
PER	0.113712	0.11042	0.0267638	0.086051	0.149991	0.0572655	0.231008
VNM	0.105826	0.0996836	0.0234751	0.0811099	0.136326	0.0605922	0.18014
PSE	0.14651	0.144895	0.0281988	0.111001	0.180484	0.0861023	0.228008
TUN	0.1196	0.117092	0.0253924	0.0890358	0.152558	0.0523818	0.201633
NLD	0.119261	0.11317	0.0245193	0.0912598	0.154137	0.0688044	0.193109
GTM	0.115639	0.110855	0.0243215	0.088082	0.141786	0.0658107	0.217685
URY	0.0931368	0.0897065	0.0203582	0.0702173	0.124828	0.055784	0.145447
HRV	0.127598	0.118996	0.0309307	0.0935187	0.171853	0.0793704	0.241506
IDN	0.10538	0.10409	0.0237318	0.0770623	0.136456	0.0547648	0.187808
LAO	0.126303	0.122196	0.0266956	0.0972557	0.158625	0.0668551	0.248796
GUY	0.116087	0.109453	0.0323585	0.0813782	0.153896	0.0673438	0.219499
SLB	0.120791	0.120777	0.0245484	0.0898435	0.151845	0.0718864	0.19548
ISL	0.157439	0.147897	0.0345998	0.121935	0.215416	0.0987535	0.255045
MOZ	0.113645	0.109745	0.0240651	0.0848391	0.145519	0.0710782	0.190773
MLI	0.104659	0.103084	0.0199917	0.0829591	0.127324	0.0621355	0.193501
PHL	0.102455	0.096479	0.0262394	0.0759768	0.143007	0.0568454	0.193556
CAN	0.105161	0.103134	0.0200749	0.0831731	0.126507	0.070826	0.183526
CMR	0.11189	0.107506	0.0235453	0.088636	0.14954	0.0615971	0.176237
FJI	0.110324	0.106844	0.0219525	0.086585	0.135949	0.0525177	0.17747
CIV	0.10324	0.100784	0.0199168	0.0815762	0.128204	0.0567337	0.171007
TUR	0.156349	0.149362	0.0386626	0.116818	0.203452	0.098934	0.299912
LBR	0.11761	0.114647	0.0265715	0.088872	0.150373	0.0626882	0.216632
BEN	0.106076	0.0999095	0.02729	0.076473	0.14544	0.0558453	0.205068

## Sheet: Stats_ATR_CCS
	mean	median	std	p10	p90	min	max
CHE	0.113334	0.112299	0.0214783	0.0852803	0.137237	0.0692901	0.190116
SLV	0.0832841	0.0826439	0.0139403	0.0678172	0.100367	0.0545949	0.130202
ARG	0.0962425	0.0939838	0.0192632	0.0740819	0.116153	0.0616464	0.177909
PAN	0.0756708	0.0733814	0.0136755	0.0617136	0.0926228	0.0429746	0.124012
UKR	0.100068	0.0962021	0.0172008	0.0801718	0.124595	0.0678629	0.148654
GEO	0.0629478	0.0614711	0.013009	0.0472533	0.0790914	0.03637	0.104389
CUB	0.099455	0.100124	0.0183758	0.0731497	0.120964	0.0684214	0.154237
ECU	0.0993992	0.0958652	0.0188641	0.0790105	0.126143	0.0640155	0.154475
DEU	0.118862	0.116857	0.0242056	0.0898902	0.150038	0.0764459	0.199439
BFA	0.0780954	0.0758954	0.0139938	0.0630495	0.096924	0.0486186	0.123249
MDG	0.0707588	0.0687882	0.0144304	0.0563715	0.0873433	0.0445459	0.14689
KGZ	0.0749285	0.0718714	0.01607	0.0582319	0.0946346	0.044554	0.137144
IRQ	0.0856999	0.0843421	0.0151383	0.0669822	0.103904	0.0515033	0.127728
SOM	0.0915284	0.0885408	0.0169862	0.0712937	0.111762	0.064701	0.165917
NAM	0.0780784	0.0755364	0.015228	0.063661	0.0930251	0.047	0.14451
ARE	0.0774399	0.0738658	0.0154812	0.0626107	0.0918344	0.0455167	0.149197
HUN	0.101167	0.0973058	0.0209193	0.0776144	0.127632	0.0643081	0.194646
SEN	0.0701693	0.0683484	0.0142098	0.0563436	0.0852134	0.0438734	0.132688
LBY	0.0667751	0.0643375	0.0128019	0.0521478	0.086593	0.0459426	0.121885
SDN	0.104776	0.100489	0.0233848	0.0770877	0.135372	0.0655545	0.17618
MYS	0.0747473	0.0730566	0.0134645	0.0610732	0.0920512	0.0438138	0.11237
SUR	0.0814924	0.0818254	0.0155581	0.0607339	0.102473	0.0502472	0.130414
BLZ	0.0899504	0.0872104	0.0170001	0.0712976	0.11153	0.051897	0.140991
SVN	0.110555	0.110363	0.0220829	0.0858199	0.140301	0.0561776	0.193578
CZE	0.0938431	0.0900682	0.0210539	0.0698763	0.122438	0.060698	0.157795
IRN	0.0783845	0.0755857	0.0147257	0.0613351	0.0951139	0.0501807	0.142491
SLE	0.078154	0.0758573	0.0148947	0.0597968	0.0993021	0.0501072	0.11145
JOR	0.0743978	0.0731042	0.0117694	0.0611894	0.0892602	0.0508927	0.121244
LTU	0.101524	0.0978421	0.0212857	0.0767712	0.130126	0.0651727	0.15481
SWE	0.0885243	0.0842194	0.0206602	0.0641222	0.119036	0.0531449	0.135106
POL	0.105752	0.100832	0.0220389	0.0819471	0.129934	0.0643822	0.216505
TZA	0.0708082	0.0702057	0.0127058	0.0531271	0.0868899	0.0399789	0.105228
VEN	0.120311	0.117058	0.0209222	0.0974324	0.14614	0.0742834	0.186447
KEN	0.0785292	0.0772634	0.0136787	0.0609828	0.0966015	0.0516717	0.133597
SVK	0.0962656	0.0940785	0.0198833	0.0745897	0.126457	0.0627424	0.155511
GBR	0.0981562	0.0939558	0.0186517	0.0751971	0.123047	0.0679232	0.16589
MAR	0.0732391	0.072207	0.0155796	0.0561209	0.0889445	0.04252	0.161259
AGO	0.075844	0.0758351	0.0142593	0.0558099	0.0931259	0.0463729	0.124479
KWT	0.0644308	0.0616392	0.0139376	0.0500801	0.0823803	0.0434891	0.119531
UGA	0.0747126	0.0728829	0.0145729	0.0569496	0.0916826	0.0494569	0.124298
KHM	0.0682596	0.0657964	0.0141123	0.0532472	0.0853719	0.0442772	0.113756
COD	0.0750812	0.0728447	0.016115	0.0594618	0.0928614	0.0472398	0.134147
QAT	0.0606438	0.058854	0.0135713	0.04707	0.0765706	0.0373515	0.130545
BGD	0.0759785	0.0736199	0.0145838	0.061809	0.0958596	0.0481735	0.124676
GRC	0.10459	0.103019	0.0218049	0.0791663	0.130067	0.0691611	0.196785
IND	0.0662122	0.0633282	0.0141332	0.0532224	0.0822198	0.0414134	0.127551
MDA	0.0851437	0.0834976	0.0151287	0.0673614	0.106595	0.0544397	0.144372
GAB	0.0873989	0.0834111	0.0175425	0.0677049	0.111973	0.0533592	0.142861
MWI	0.0800617	0.0778282	0.0156086	0.0620972	0.101129	0.0539598	0.122976
EGY	0.0868669	0.0859008	0.0136071	0.070152	0.10607	0.0627492	0.118634
MNE	0.0887468	0.0874706	0.0151473	0.0701326	0.108893	0.0607793	0.142258
ZAF	0.0707442	0.0692359	0.0128216	0.0559862	0.0871079	0.0492574	0.111448
MKD	0.0792983	0.0784614	0.0145944	0.0619136	0.101137	0.0442175	0.119917
BHS	0.0818116	0.0820087	0.0160354	0.063808	0.102109	0.0457407	0.140269
ZWE	0.0831551	0.0789137	0.0185003	0.064042	0.107598	0.0530814	0.136112
IRL	0.111505	0.107987	0.0225223	0.0859035	0.13709	0.0695797	0.203024
LKA	0.0901305	0.0886639	0.0171894	0.0698102	0.112993	0.0572552	0.142297
SRB	0.084722	0.0835436	0.0148046	0.065615	0.10318	0.054367	0.126102
COG	0.0857117	0.0843161	0.0167382	0.0679461	0.103378	0.0573922	0.180847
NZL	0.0938389	0.0896526	0.0177391	0.0742379	0.115782	0.064954	0.14445
LVA	0.0966608	0.0923429	0.0209167	0.0732263	0.125815	0.055033	0.178285
AUS	0.0942611	0.0919554	0.0163925	0.0753409	0.116061	0.0627376	0.146995
FLK	0.0808329	0.0803091	0.0145763	0.0655882	0.0989183	0.0510012	0.126709
ISR	0.0820112	0.0795359	0.0149058	0.0641611	0.0969846	0.0549511	0.142864
COL	0.0714175	0.069915	0.014119	0.0560037	0.0905929	0.0473439	0.118726
FIN	0.105961	0.10402	0.0210154	0.0819677	0.130807	0.0707065	0.177379
GMB	0.0665966	0.0635125	0.0148377	0.050678	0.087309	0.0421159	0.115046
PRT	0.101236	0.098041	0.0226494	0.0759667	0.134519	0.0644586	0.170111
SAU	0.0901843	0.0886248	0.0151834	0.0707073	0.109363	0.0606605	0.13129
PNG	0.0719552	0.0687547	0.0136314	0.0562749	0.0904531	0.0472696	0.112314
JAM	0.0757316	0.0749163	0.0137798	0.0595998	0.0921426	0.0488996	0.134928
PAK	0.0864791	0.0850507	0.0162541	0.0673491	0.10776	0.0538743	0.140708
ZMB	0.0819758	0.0812525	0.0155948	0.0623682	0.100486	0.0533172	0.128152
CHN	0.0854596	0.0835927	0.0195562	0.0654592	0.108817	0.0545306	0.161826
KAZ	0.0686365	0.0656162	0.0147091	0.0537625	0.0855498	0.0451775	0.133439
ARM	0.0725374	0.0707869	0.0137601	0.056517	0.0905311	0.046958	0.117245
LUX	0.118404	0.116995	0.0225018	0.0931065	0.146246	0.0657395	0.18856
ALB	0.0769422	0.0755999	0.0139089	0.0620705	0.0940991	0.0478825	0.127472
HND	0.0816201	0.083415	0.0142661	0.0646223	0.0982618	0.0487724	0.138254
NIC	0.0756454	0.0745751	0.0151745	0.0589228	0.097165	0.0432298	0.125052
NER	0.0847496	0.082406	0.0166344	0.0677326	0.105219	0.052016	0.156338
ETH	0.0925892	0.0898181	0.0183626	0.070658	0.119845	0.0609437	0.147578
GRL	0.0738042	0.0714316	0.0122536	0.0601718	0.0899049	0.0468998	0.118613
OMN	0.0864969	0.0842321	0.0149128	0.0691115	0.105447	0.0545484	0.145259
ESP	0.1107	0.106829	0.0234806	0.0840455	0.146195	0.0633503	0.175837
TJK	0.0753589	0.0735064	0.0135016	0.0612171	0.090982	0.0476804	0.127747
YEM	0.0992089	0.0989273	0.0176483	0.0781151	0.123231	0.0627391	0.14087
THA	0.0723453	0.0697646	0.0147528	0.0571792	0.0925308	0.0413177	0.120321
UZB	0.0716367	0.068617	0.0158675	0.0554228	0.0911794	0.0405672	0.153772
DZA	0.0708461	0.0691524	0.0118916	0.0569583	0.0872856	0.0482129	0.106516
FRA	0.114088	0.109279	0.0232674	0.0891034	0.144059	0.0693421	0.20643
CRI	0.0811241	0.0783541	0.0132573	0.0657204	0.0999068	0.0517585	0.120295
AUT	0.0866734	0.0843591	0.0173171	0.0651421	0.114844	0.0516419	0.12374
GHA	0.0787999	0.0771693	0.0151021	0.0620839	0.0963075	0.0454273	0.125674
MEX	0.068356	0.0664909	0.0109501	0.0567081	0.0815112	0.0455136	0.108905
HTI	0.0893343	0.0884622	0.0169351	0.0699044	0.107975	0.0479043	0.153514
JPN	0.109529	0.10451	0.0247971	0.0840512	0.135715	0.0692013	0.206267
NPL	0.0716601	0.0715733	0.0133831	0.0528865	0.089589	0.0453129	0.114401
BGR	0.0949732	0.0902844	0.0210263	0.0736798	0.119127	0.0592254	0.18514
DNK	0.107062	0.10184	0.0213725	0.0844038	0.135317	0.0723765	0.193211
MMR	0.0866746	0.0834345	0.0184592	0.0667351	0.106625	0.0563585	0.15606
SWZ	0.0708657	0.0693181	0.0139824	0.052642	0.0881005	0.0432227	0.107283
CYP	0.103803	0.100543	0.0198535	0.0826515	0.126325	0.0659237	0.194816
ROU	0.108249	0.106534	0.0208495	0.0854723	0.133308	0.0714296	0.180309
DOM	0.0767492	0.0748548	0.0146988	0.0604925	0.0967605	0.0537872	0.132775
BRA	0.0724312	0.070054	0.0131942	0.0551324	0.0880446	0.0492615	0.114521
ITA	0.098307	0.0966222	0.0178792	0.0756423	0.121479	0.0534683	0.153689
SYR	0.101172	0.09842	0.0219083	0.0752889	0.128885	0.058468	0.186158
CHL	0.070095	0.0684524	0.0134305	0.0541714	0.0869553	0.0446422	0.114082
BEL	0.116797	0.111487	0.0256652	0.0896347	0.146166	0.0669612	0.223587
EST	0.0922336	0.0900143	0.0180497	0.0726021	0.116135	0.0590778	0.155198
LBN	0.108071	0.10778	0.0211956	0.0783866	0.133643	0.0641839	0.170508
GIN	0.0820482	0.0805333	0.0168959	0.0618373	0.103734	0.0510477	0.153331
BRN	0.0695428	0.0681447	0.0129378	0.0546501	0.0863758	0.0469447	0.113595
MNG	0.0786446	0.0793938	0.01525	0.0618093	0.0977302	0.0412359	0.129693
PRY	0.0740813	0.0716727	0.0139821	0.0585578	0.0947801	0.0447948	0.111079
USA	0.0699838	0.0684498	0.012362	0.0554383	0.0871632	0.0468586	0.108205
RWA	0.0709678	0.0692152	0.0130092	0.0565556	0.0866773	0.0485111	0.109136
PRK	0.100371	0.098763	0.0184414	0.0779693	0.122186	0.0627775	0.164769
NGA	0.0772348	0.0762121	0.0139034	0.0621407	0.0945421	0.0459363	0.13194
BWA	0.0600038	0.0577068	0.011624	0.0472448	0.0771405	0.0362383	0.0897508
NOR	0.109521	0.105113	0.0224546	0.083353	0.137594	0.0625274	0.175022
BIH	0.090328	0.0886504	0.0158926	0.0709735	0.110028	0.067258	0.156978
BOL	0.0997997	0.0981837	0.0192052	0.0763926	0.124871	0.067809	0.159023
AZE	0.0768955	0.0751364	0.0152367	0.0606728	0.093697	0.0468313	0.159165
BLR	0.11752	0.113392	0.0214163	0.0927941	0.150541	0.0768156	0.174218
KOR	0.0889892	0.0854333	0.016529	0.0705456	0.110467	0.0542299	0.144281
RUS	0.05175	0.0511551	0.0073524	0.0426049	0.060724	0.0348225	0.0685798
PER	0.068786	0.066099	0.0144569	0.0533121	0.0837873	0.0442518	0.127601
VNM	0.0739917	0.0725866	0.0125853	0.0595507	0.0882344	0.0502533	0.113468
PSE	0.120836	0.119167	0.0219868	0.093843	0.147227	0.083592	0.192662
TUN	0.0883712	0.0877902	0.0150777	0.0690612	0.108753	0.0569919	0.138202
NLD	0.114464	0.110343	0.0232491	0.0910924	0.146927	0.0699558	0.211103
GTM	0.076966	0.0750577	0.0145891	0.0600011	0.0963349	0.0501889	0.123064
URY	0.0683801	0.0663128	0.012308	0.0545591	0.0864382	0.0481835	0.115418
HRV	0.0994572	0.095485	0.0190768	0.0759825	0.124504	0.0657624	0.154643
IDN	0.0741832	0.0730317	0.013443	0.0575883	0.0929935	0.0453158	0.111901
LAO	0.0874204	0.0860657	0.0144363	0.0718037	0.104704	0.058507	0.144061
GUY	0.0700055	0.0681667	0.0125321	0.0553559	0.0856696	0.0454807	0.114845
SLB	0.0779103	0.0762107	0.0127021	0.063442	0.0931237	0.0478194	0.132811
ISL	0.100001	0.0986053	0.0170767	0.0795378	0.123766	0.0619448	0.155983
MOZ	0.0815629	0.0809375	0.013481	0.0643963	0.0984001	0.0541971	0.117575
MLI	0.0805594	0.0796097	0.0159635	0.0636662	0.0985602	0.0493408	0.159031
PHL	0.0671281	0.0651966	0.0138958	0.0534121	0.0824436	0.0459235	0.13141
CAN	0.0915134	0.089945	0.0187974	0.0718814	0.112608	0.0593226	0.181285
CMR	0.0766552	0.0757517	0.0121203	0.0610228	0.0945343	0.0504403	0.105988
FJI	0.0814645	0.0807967	0.0146083	0.0625278	0.100525	0.0532249	0.121494
CIV	0.0671667	0.0659742	0.0127556	0.0518246	0.0839994	0.0451235	0.105968
TUR	0.0960861	0.095037	0.0134059	0.0822638	0.112397	0.0582841	0.135055
LBR	0.0801881	0.0783836	0.015013	0.0654805	0.100984	0.047884	0.129792
BEN	0.0703846	0.0674243	0.0167396	0.0547246	0.0871742	0.0420116	0.149354

## Sheet: Stats_B_PYR_kerosene
	mean	median	std	p10	p90	min	max
CHE	0.295784	0.285459	0.0474921	0.238863	0.35674	0.209163	0.505121
SLV	0.241015	0.234759	0.0362192	0.199246	0.287364	0.161626	0.349261
ARG	0.264433	0.256474	0.0475299	0.208577	0.336187	0.155897	0.39684
PAN	0.206075	0.201052	0.0280501	0.176276	0.2413	0.146778	0.318252
UKR	0.294077	0.291271	0.0451339	0.244895	0.356822	0.206524	0.451821
GEO	0.190348	0.189989	0.0272678	0.158248	0.223865	0.138743	0.278988
CUB	0.293997	0.291283	0.0453205	0.233329	0.357589	0.208225	0.406779
ECU	0.27047	0.268032	0.0420113	0.217438	0.322102	0.189005	0.396048
DEU	0.268298	0.259572	0.0440484	0.219123	0.327774	0.197332	0.40295
BFA	0.201534	0.193082	0.0361593	0.163657	0.255942	0.122643	0.30668
MDG	0.178605	0.178874	0.032023	0.141477	0.213502	0.120688	0.328979
KGZ	0.218512	0.219656	0.0331083	0.177889	0.260474	0.158526	0.322656
IRQ	0.239966	0.235695	0.0361077	0.196185	0.289961	0.177657	0.332184
SOM	0.238755	0.232725	0.0365955	0.198258	0.28818	0.158615	0.351722
NAM	0.191055	0.184434	0.0302992	0.159293	0.233062	0.138338	0.274602
ARE	0.195009	0.190081	0.0285172	0.163028	0.236699	0.133457	0.27162
HUN	0.224085	0.223185	0.0334342	0.192119	0.26232	0.156619	0.349489
SEN	0.162482	0.159194	0.025682	0.135498	0.199491	0.106577	0.229466
LBY	0.164102	0.164744	0.0225032	0.135399	0.191082	0.118293	0.221796
SDN	0.28819	0.282295	0.051967	0.229527	0.36102	0.170996	0.428257
MYS	0.173361	0.172414	0.0300091	0.136457	0.21318	0.115055	0.259363
SUR	0.216478	0.211252	0.0356456	0.176574	0.270474	0.147597	0.307285
BLZ	0.259134	0.255729	0.0411561	0.20726	0.313066	0.175379	0.365546
SVN	0.255214	0.254227	0.0383875	0.20801	0.297994	0.178303	0.381495
CZE	0.205021	0.202581	0.0340169	0.164463	0.244454	0.131938	0.383037
IRN	0.225379	0.222902	0.0330926	0.185472	0.272179	0.16728	0.314272
SLE	0.224388	0.218767	0.0397132	0.181537	0.28005	0.150188	0.322083
JOR	0.206364	0.202019	0.0292478	0.172901	0.244062	0.145867	0.280536
LTU	0.226372	0.223162	0.0355447	0.188448	0.269539	0.159384	0.361763
SWE	0.195892	0.194854	0.025986	0.16442	0.230878	0.145234	0.281176
POL	0.232978	0.225669	0.0376758	0.190301	0.280102	0.150214	0.390868
TZA	0.177458	0.176647	0.0296098	0.147488	0.211738	0.115613	0.314827
VEN	0.337392	0.340079	0.0552276	0.269022	0.399508	0.196769	0.497794
KEN	0.23387	0.22996	0.0320724	0.194399	0.282465	0.170679	0.299768
SVK	0.227281	0.227182	0.0301564	0.189426	0.266428	0.167204	0.318496
GBR	0.272142	0.266643	0.0386631	0.223812	0.315535	0.197614	0.410129
MAR	0.186145	0.181586	0.0316453	0.156287	0.222154	0.131171	0.316473
AGO	0.197035	0.195857	0.0345097	0.15679	0.248228	0.135362	0.322251
KWT	0.173822	0.175125	0.0244383	0.141825	0.201825	0.12355	0.252095
UGA	0.181743	0.180539	0.0333366	0.141631	0.21805	0.123502	0.324799
KHM	0.202253	0.200142	0.0328776	0.164536	0.243442	0.133433	0.318168
COD	0.21327	0.206366	0.0369896	0.1682	0.270273	0.140397	0.301113
QAT	0.167957	0.166359	0.0234909	0.140147	0.192414	0.115023	0.26838
BGD	0.213536	0.212907	0.0294886	0.174075	0.253422	0.140939	0.284718
GRC	0.245461	0.241839	0.0384416	0.197959	0.29293	0.172986	0.386417
IND	0.186613	0.188458	0.0300684	0.148828	0.222306	0.12725	0.276451
MDA	0.243271	0.233956	0.0375524	0.200121	0.299117	0.163828	0.331392
GAB	0.237551	0.2364	0.0426464	0.183279	0.297879	0.155074	0.33192
MWI	0.214387	0.213143	0.0407406	0.159713	0.268121	0.11827	0.312778
EGY	0.224755	0.223855	0.0361826	0.179474	0.262953	0.147119	0.354346
MNE	0.247703	0.240487	0.0396402	0.205842	0.300302	0.176329	0.40068
ZAF	0.171766	0.168842	0.0260199	0.141091	0.203454	0.124685	0.26435
MKD	0.231961	0.22448	0.036228	0.189374	0.281314	0.161158	0.329194
BHS	0.219703	0.2125	0.0357043	0.178057	0.273435	0.156805	0.328471
ZWE	0.218225	0.211665	0.0392962	0.174109	0.271177	0.145934	0.363274
IRL	0.262054	0.260591	0.0345894	0.21937	0.311283	0.192874	0.364245
LKA	0.265241	0.265606	0.0431431	0.207842	0.321733	0.173127	0.373845
SRB	0.237039	0.230509	0.0373501	0.191311	0.282227	0.167967	0.364386
COG	0.225929	0.217187	0.0369901	0.184574	0.276511	0.16422	0.365643
NZL	0.235096	0.234144	0.0405957	0.190974	0.278638	0.166274	0.387592
LVA	0.230454	0.226835	0.0331243	0.193217	0.272083	0.15416	0.34771
AUS	0.236131	0.233467	0.0313555	0.197816	0.287227	0.173554	0.304248
FLK	0.22524	0.225839	0.0331075	0.183992	0.268919	0.152734	0.32083
ISR	0.211961	0.210041	0.0312275	0.174624	0.255312	0.148192	0.299809
COL	0.181189	0.179005	0.0314389	0.142155	0.220553	0.102591	0.274853
FIN	0.258579	0.258834	0.0392327	0.214039	0.310999	0.176163	0.368725
GMB	0.173377	0.166734	0.0306829	0.140452	0.215918	0.106006	0.266339
PRT	0.234959	0.233392	0.0331473	0.198657	0.272183	0.161399	0.376962
SAU	0.217785	0.211784	0.0338358	0.181254	0.266162	0.153959	0.325493
PNG	0.210567	0.210914	0.0289618	0.171842	0.245577	0.140528	0.288613
JAM	0.214758	0.211946	0.0282334	0.184504	0.25542	0.127625	0.302812
PAK	0.250092	0.245583	0.0383597	0.206774	0.296355	0.164494	0.386633
ZMB	0.220384	0.211928	0.0398421	0.177374	0.270217	0.152812	0.347528
CHN	0.161681	0.155892	0.0284911	0.129874	0.202199	0.0949931	0.242369
KAZ	0.192798	0.187755	0.0296402	0.162794	0.233135	0.130844	0.275238
ARM	0.21168	0.205743	0.03247	0.176697	0.250688	0.14377	0.303791
LUX	0.262907	0.260365	0.0338725	0.226402	0.302383	0.191066	0.350927
ALB	0.223677	0.220949	0.0300895	0.188912	0.26037	0.151156	0.310872
HND	0.221702	0.221419	0.0313995	0.180312	0.261329	0.156158	0.323758
NIC	0.197168	0.196696	0.0345562	0.154307	0.24891	0.119631	0.294106
NER	0.217953	0.214425	0.0416928	0.171026	0.27601	0.14294	0.344555
ETH	0.249904	0.243985	0.043772	0.199328	0.31579	0.166536	0.351439
GRL	0.220534	0.213503	0.0419619	0.174113	0.27316	0.140017	0.358725
OMN	0.230816	0.227634	0.0366814	0.188108	0.278048	0.158249	0.38302
ESP	0.263687	0.259585	0.0334755	0.227023	0.304403	0.196962	0.368759
TJK	0.227993	0.225883	0.0383212	0.182001	0.282246	0.157881	0.344188
YEM	0.289735	0.286664	0.0445936	0.237788	0.339448	0.181976	0.433895
THA	0.174152	0.171092	0.0305354	0.135247	0.21782	0.110105	0.24178
UZB	0.202291	0.197622	0.0340536	0.164668	0.245349	0.148845	0.324973
DZA	0.181375	0.177208	0.0303408	0.146949	0.216262	0.125175	0.282728
FRA	0.267954	0.264806	0.0342228	0.227032	0.314361	0.18887	0.355445
CRI	0.217701	0.213935	0.0316797	0.180761	0.25939	0.150162	0.300699
AUT	0.216861	0.212353	0.0307882	0.185045	0.247005	0.162147	0.337839
GHA	0.220317	0.220294	0.0376323	0.171173	0.273924	0.145557	0.325885
MEX	0.164212	0.161219	0.025461	0.133481	0.201328	0.11543	0.228265
HTI	0.270889	0.263081	0.0534694	0.212598	0.332559	0.163122	0.441722
JPN	0.308635	0.303555	0.0460942	0.257987	0.364814	0.224502	0.508659
NPL	0.203503	0.199363	0.0348091	0.164318	0.256019	0.141273	0.29091
BGR	0.231959	0.227678	0.0348031	0.194627	0.278113	0.156601	0.364757
DNK	0.259014	0.253463	0.0370857	0.217568	0.31154	0.186644	0.388675
MMR	0.248373	0.242317	0.0389005	0.206095	0.30086	0.16271	0.370662
SWZ	0.180487	0.175848	0.0313642	0.142775	0.222028	0.112056	0.286115
CYP	0.245603	0.240491	0.0384074	0.202133	0.29026	0.178205	0.374208
ROU	0.260246	0.261167	0.0385642	0.216436	0.309603	0.17897	0.378503
DOM	0.208904	0.203719	0.0287174	0.175287	0.248179	0.137986	0.300909
BRA	0.173743	0.170004	0.0304626	0.14082	0.210116	0.11035	0.27736
ITA	0.225187	0.222453	0.039396	0.182471	0.265209	0.155384	0.435273
SYR	0.300046	0.290635	0.0534968	0.242509	0.371863	0.180387	0.478379
CHL	0.16615	0.163701	0.0236005	0.139508	0.195263	0.122696	0.251625
BEL	0.259732	0.258288	0.0397279	0.215043	0.309526	0.194647	0.404152
EST	0.219133	0.218651	0.0326181	0.181676	0.255957	0.159388	0.334042
LBN	0.333443	0.326223	0.0641057	0.25596	0.424139	0.221938	0.49601
GIN	0.216248	0.211889	0.0365031	0.171594	0.267341	0.142812	0.321346
BRN	0.187812	0.186709	0.0253348	0.156666	0.220014	0.139849	0.255965
MNG	0.218549	0.214741	0.032954	0.181668	0.263101	0.159419	0.312388
PRY	0.182719	0.178966	0.0283634	0.148138	0.219842	0.130266	0.280857
USA	0.212857	0.206593	0.031748	0.178726	0.253112	0.15033	0.317303
RWA	0.183456	0.179461	0.0286542	0.145668	0.223088	0.129949	0.268244
PRK	0.284019	0.280767	0.049518	0.226974	0.346348	0.173915	0.471594
NGA	0.209399	0.209494	0.0372409	0.165634	0.255947	0.133128	0.313794
BWA	0.148671	0.142695	0.0269242	0.119264	0.184465	0.106939	0.233415
NOR	0.275628	0.279866	0.0405413	0.221549	0.322594	0.204998	0.388206
BIH	0.27052	0.266035	0.0468554	0.219884	0.3253	0.180714	0.463482
BOL	0.263959	0.258296	0.0441499	0.210322	0.322344	0.167039	0.375253
AZE	0.214328	0.210032	0.0284862	0.180853	0.25361	0.14852	0.291815
BLR	0.338085	0.328793	0.0602529	0.268098	0.412645	0.215808	0.511454
KOR	0.220002	0.219352	0.0297156	0.181495	0.2583	0.165209	0.31042
RUS	0.205305	0.199967	0.0320806	0.168246	0.241844	0.144042	0.316092
PER	0.178987	0.178972	0.0235118	0.148795	0.209492	0.125643	0.238358
VNM	0.190756	0.187994	0.027482	0.153483	0.227024	0.136941	0.274833
PSE	0.331265	0.33014	0.0591091	0.259136	0.408579	0.204656	0.497912
TUN	0.232938	0.232465	0.0394013	0.183368	0.284511	0.161257	0.354342
NLD	0.249303	0.250799	0.03361	0.20284	0.288467	0.185748	0.34753
GTM	0.215339	0.211246	0.0338798	0.174058	0.256409	0.149016	0.318197
URY	0.169524	0.166923	0.0281342	0.135633	0.210266	0.113401	0.239504
HRV	0.237169	0.2337	0.0335011	0.198676	0.282698	0.169734	0.334577
IDN	0.187984	0.186971	0.0300854	0.151548	0.224043	0.135981	0.287709
LAO	0.24922	0.246495	0.0432171	0.198744	0.296206	0.169799	0.375765
GUY	0.177946	0.174506	0.0275229	0.147061	0.208009	0.125548	0.267316
SLB	0.230038	0.226475	0.0339538	0.187047	0.270607	0.173556	0.326866
ISL	0.274959	0.266967	0.0409388	0.227293	0.335404	0.191534	0.368966
MOZ	0.212461	0.205871	0.0409952	0.168661	0.268962	0.136422	0.375114
MLI	0.210649	0.211819	0.0368972	0.168667	0.246396	0.121481	0.334812
PHL	0.175021	0.170403	0.024699	0.146888	0.208735	0.122757	0.239931
CAN	0.237378	0.240505	0.035733	0.190466	0.280355	0.1711	0.377475
CMR	0.202117	0.199604	0.0311996	0.167062	0.241285	0.141687	0.290947
FJI	0.217915	0.216257	0.0325979	0.182707	0.254042	0.163254	0.333344
CIV	0.170559	0.170714	0.0278664	0.137732	0.21234	0.118144	0.258552
TUR	0.266616	0.269353	0.0365738	0.221174	0.309253	0.168003	0.363609
LBR	0.219998	0.211549	0.0391893	0.182057	0.271304	0.14429	0.396415
BEN	0.178077	0.173727	0.0265037	0.147698	0.212086	0.124813	0.26326

## Sheet: Stats_CLR
	mean	median	std	p10	p90	min	max
CHE	0.111072	0.109173	0.0200326	0.0879999	0.137934	0.067642	0.166124
SLV	0.0892268	0.0885023	0.0181412	0.0687014	0.111938	0.0541946	0.161917
ARG	0.102736	0.10084	0.0195277	0.079567	0.125843	0.0653691	0.16546
PAN	0.0764469	0.0757271	0.0153491	0.0576774	0.0964796	0.0479167	0.117301
UKR	0.10601	0.105396	0.0172064	0.0822432	0.126643	0.0752973	0.157772
GEO	0.0663488	0.0651822	0.0133798	0.050218	0.0841283	0.0403612	0.099265
CUB	0.104079	0.102706	0.0184719	0.0833421	0.125911	0.062893	0.150903
ECU	0.10644	0.104825	0.0208644	0.0819163	0.130758	0.0605856	0.174203
DEU	0.112452	0.110416	0.0213008	0.0882173	0.141699	0.0659991	0.183648
BFA	0.0820335	0.0810129	0.0175187	0.0615981	0.104096	0.0530401	0.138135
MDG	0.0740475	0.0719919	0.0143916	0.0583448	0.0916148	0.0461951	0.12255
KGZ	0.0772957	0.0745358	0.0145437	0.0605069	0.0974524	0.0505744	0.123296
IRQ	0.0875808	0.086261	0.0166938	0.0688191	0.104839	0.053159	0.15124
SOM	0.0998695	0.0957973	0.0211406	0.0764018	0.132074	0.060947	0.160565
NAM	0.0796304	0.0768762	0.0168909	0.0603868	0.104213	0.0510506	0.12136
ARE	0.0767914	0.0749802	0.0155178	0.0583914	0.0940131	0.0498071	0.127538
HUN	0.103273	0.100979	0.022479	0.0778052	0.125434	0.0538819	0.204208
SEN	0.0751475	0.0735704	0.0163314	0.0563428	0.0991636	0.045377	0.122595
LBY	0.069371	0.066805	0.0142116	0.0531428	0.0878656	0.0455732	0.119226
SDN	0.11395	0.115094	0.023757	0.0832576	0.142367	0.0596948	0.196219
MYS	0.0745878	0.072724	0.0143785	0.0559118	0.0930495	0.0441664	0.112037
SUR	0.0820743	0.0813806	0.0147446	0.0632023	0.106767	0.053178	0.11466
BLZ	0.0952482	0.0914866	0.0205192	0.0716107	0.123698	0.0562778	0.159108
SVN	0.109585	0.105808	0.0225283	0.0826152	0.140505	0.067368	0.186681
CZE	0.0967179	0.0912774	0.0231294	0.0687877	0.127978	0.0597032	0.168691
IRN	0.0839013	0.0818688	0.0166018	0.0626376	0.107227	0.0466825	0.131268
SLE	0.086604	0.0838743	0.019041	0.063065	0.113247	0.0517199	0.139796
JOR	0.0778396	0.0745865	0.015232	0.0613589	0.0991722	0.0505332	0.132655
LTU	0.104437	0.101026	0.0235729	0.080374	0.130634	0.0565176	0.201495
SWE	0.0911276	0.0866756	0.0233338	0.0679042	0.122516	0.0521313	0.196702
POL	0.112132	0.10766	0.023825	0.0845697	0.145053	0.0716841	0.1815
TZA	0.0723442	0.0702731	0.015139	0.0551297	0.0962211	0.0388406	0.113936
VEN	0.126	0.126349	0.0243281	0.0925364	0.158347	0.0804277	0.194618
KEN	0.0834152	0.0809955	0.0161949	0.0633984	0.109115	0.0529747	0.125218
SVK	0.0976429	0.0948795	0.0205413	0.0742336	0.125847	0.0543783	0.178634
GBR	0.0970971	0.0951378	0.0169956	0.0768701	0.120622	0.0665166	0.146059
MAR	0.0761875	0.0736771	0.0145975	0.0608142	0.0992955	0.0490775	0.117846
AGO	0.0812369	0.0772511	0.0174448	0.0622273	0.107987	0.0450894	0.13194
KWT	0.0629189	0.0632097	0.012399	0.0472969	0.0767004	0.0380444	0.11476
UGA	0.0751962	0.0753714	0.0146772	0.0562212	0.0947716	0.0413754	0.112725
KHM	0.0735219	0.0712139	0.0143998	0.0562699	0.0954212	0.0431035	0.119596
COD	0.0786497	0.0764578	0.0153205	0.0581816	0.0998668	0.0437279	0.115972
QAT	0.0637076	0.0597313	0.0148504	0.046795	0.0871896	0.0353542	0.100688
BGD	0.0802632	0.07939	0.016105	0.0609247	0.0993218	0.0508762	0.133212
GRC	0.11126	0.107161	0.0253053	0.0806112	0.152274	0.0605122	0.175263
IND	0.0676753	0.0680828	0.0130135	0.0520652	0.0853331	0.0411782	0.103326
MDA	0.0876288	0.0857345	0.0166184	0.0692348	0.107404	0.0483423	0.150978
GAB	0.0943741	0.093105	0.0168843	0.0758311	0.119307	0.061996	0.144499
MWI	0.0863984	0.0850259	0.0164865	0.0658399	0.107225	0.0560659	0.136934
EGY	0.090739	0.0864783	0.0187744	0.0705738	0.11497	0.063215	0.14549
MNE	0.0914456	0.0897841	0.0172725	0.0713409	0.111004	0.0570564	0.159164
ZAF	0.071315	0.0697458	0.0144518	0.054482	0.0880802	0.0418017	0.117489
MKD	0.0831936	0.0823905	0.0171992	0.063428	0.102138	0.0535809	0.143652
BHS	0.0845426	0.0852132	0.0164672	0.0658686	0.106571	0.0477884	0.123856
ZWE	0.0888039	0.0883574	0.018425	0.0650674	0.112516	0.0528187	0.137103
IRL	0.111538	0.110596	0.0234912	0.0841724	0.141779	0.0581575	0.179241
LKA	0.0974386	0.0951256	0.0197713	0.0725425	0.124165	0.0644724	0.156687
SRB	0.0820586	0.0816776	0.0134468	0.0651921	0.0964759	0.0556986	0.121339
COG	0.0917712	0.0903681	0.0185705	0.071242	0.116582	0.055437	0.162939
NZL	0.0917642	0.0881988	0.0166988	0.0738899	0.112368	0.0622564	0.145446
LVA	0.0979114	0.0934915	0.0232748	0.0748066	0.122749	0.0591154	0.228336
AUS	0.0932725	0.0878379	0.0169965	0.0760524	0.117142	0.0566914	0.147438
FLK	0.0797281	0.0770542	0.0157925	0.0610932	0.101321	0.0530589	0.127864
ISR	0.0827206	0.0824737	0.0162297	0.0644898	0.102664	0.0558115	0.14397
COL	0.0723032	0.0709675	0.0151885	0.0552334	0.0948681	0.0447625	0.114288
FIN	0.10607	0.101515	0.0231197	0.0801166	0.141788	0.0670914	0.170018
GMB	0.0700582	0.0688264	0.0145771	0.0523402	0.0886938	0.0397121	0.12212
PRT	0.103021	0.101476	0.0223138	0.0773129	0.133115	0.0632172	0.170873
SAU	0.0878934	0.0840443	0.0157222	0.0693603	0.107643	0.0645682	0.129719
PNG	0.0784563	0.0779751	0.016372	0.0604921	0.0972659	0.0426808	0.135085
JAM	0.0815039	0.0807259	0.0166225	0.0635985	0.101511	0.050219	0.159426
PAK	0.0928332	0.0951041	0.0166299	0.0721976	0.115779	0.0536512	0.138186
ZMB	0.0881808	0.0870201	0.0170516	0.0676731	0.112785	0.0560331	0.142939
CHN	0.08638	0.0852181	0.0191266	0.06316	0.110506	0.0525424	0.143747
KAZ	0.0704084	0.0661763	0.0153008	0.0535488	0.0924188	0.0460696	0.119697
ARM	0.0747535	0.0749289	0.0138411	0.0582766	0.0906812	0.0463381	0.130773
LUX	0.118709	0.114534	0.0248769	0.088446	0.152899	0.0687232	0.181587
ALB	0.080854	0.0792055	0.0150959	0.0639804	0.0994853	0.0485074	0.143676
HND	0.0823197	0.0796493	0.0172236	0.0622777	0.10618	0.0523922	0.127985
NIC	0.0809916	0.0797848	0.0158798	0.062508	0.102059	0.044802	0.13485
NER	0.09066	0.0867744	0.0198661	0.0672687	0.121243	0.0553503	0.140218
ETH	0.0987412	0.0938723	0.0209258	0.0747562	0.126441	0.0617371	0.167344
GRL	0.0747952	0.0745777	0.0133819	0.0573913	0.0927239	0.0478702	0.107897
OMN	0.090542	0.0879438	0.0193771	0.0664819	0.113385	0.0503792	0.15847
ESP	0.111335	0.110013	0.0218095	0.0866839	0.141362	0.0668316	0.17976
TJK	0.0788442	0.0795242	0.0154291	0.059459	0.100427	0.0469603	0.114484
YEM	0.104462	0.102813	0.0214977	0.0802951	0.130511	0.059935	0.209981
THA	0.0731849	0.071906	0.0130805	0.055376	0.0921342	0.0502038	0.110739
UZB	0.0727061	0.0720658	0.0135983	0.0553359	0.0916528	0.0469833	0.109236
DZA	0.0732648	0.0710982	0.0116503	0.0603508	0.0893858	0.0505792	0.100884
FRA	0.111636	0.110263	0.0242507	0.0849159	0.142457	0.0638713	0.20631
CRI	0.0829969	0.0810936	0.0160835	0.0652484	0.101296	0.0541515	0.128103
AUT	0.0863128	0.0842203	0.0201649	0.0629257	0.113201	0.0471906	0.163619
GHA	0.0864605	0.0839939	0.0195967	0.0636983	0.1058	0.0480265	0.157859
MEX	0.0688454	0.0672392	0.0133529	0.0542128	0.0908028	0.0465379	0.102518
HTI	0.095419	0.0909516	0.0203275	0.072849	0.122268	0.0579816	0.155921
JPN	0.10657	0.104148	0.0201567	0.0827933	0.136382	0.07152	0.157851
NPL	0.0751292	0.0733193	0.0161277	0.0567573	0.0991731	0.0491755	0.117401
BGR	0.100395	0.0964514	0.0236323	0.0717891	0.135529	0.0536445	0.169402
DNK	0.109627	0.107369	0.0217221	0.0822742	0.139035	0.0693889	0.166064
MMR	0.0926462	0.0903403	0.019038	0.0698426	0.115154	0.0539254	0.163928
SWZ	0.0742455	0.0741687	0.0130275	0.0577487	0.0918428	0.0472111	0.109825
CYP	0.105682	0.103433	0.0254356	0.0771852	0.133027	0.0637184	0.210319
ROU	0.108503	0.107786	0.0186623	0.0854419	0.135587	0.0691871	0.149886
DOM	0.0769121	0.0750066	0.0145945	0.0592409	0.0938881	0.041766	0.13481
BRA	0.0727503	0.0710317	0.0143125	0.0557306	0.0932011	0.0405017	0.113393
ITA	0.100852	0.0992261	0.0212556	0.07508	0.124092	0.062635	0.192856
SYR	0.111983	0.111994	0.025221	0.0810419	0.14254	0.0547974	0.177424
CHL	0.0715261	0.0701385	0.0151932	0.0543064	0.0923527	0.0424709	0.117204
BEL	0.114484	0.110563	0.0209244	0.092144	0.143863	0.0790487	0.188099
EST	0.0956425	0.0943378	0.018887	0.0749303	0.121205	0.0514013	0.144259
LBN	0.118298	0.117156	0.0244018	0.0896718	0.147011	0.0761177	0.204504
GIN	0.0858903	0.0849893	0.0165344	0.0669641	0.108832	0.0528114	0.139116
BRN	0.0690204	0.0687468	0.0131506	0.0508078	0.0849522	0.0426511	0.119875
MNG	0.0793378	0.0790126	0.0146246	0.0610979	0.0977521	0.0473966	0.122862
PRY	0.0756163	0.0751482	0.0139906	0.0584789	0.0959554	0.049122	0.120068
USA	0.0675415	0.0656192	0.0124387	0.0544894	0.0837265	0.0409334	0.110314
RWA	0.0736109	0.0734763	0.0145876	0.0556958	0.0910061	0.0418535	0.117513
PRK	0.106291	0.102488	0.0207512	0.0809756	0.133921	0.0705008	0.152177
NGA	0.0818145	0.0799261	0.017298	0.060807	0.102224	0.0444354	0.130049
BWA	0.0618162	0.0607438	0.0101086	0.0508643	0.0748153	0.0385757	0.0901773
NOR	0.105257	0.106394	0.0188672	0.0805594	0.131963	0.0694068	0.151661
BIH	0.0907036	0.0899216	0.0171048	0.0716242	0.108668	0.0491049	0.158389
BOL	0.102117	0.0985262	0.021929	0.0769113	0.133047	0.064435	0.166636
AZE	0.0790603	0.0760129	0.0164503	0.0598234	0.0981048	0.0474954	0.12905
BLR	0.123393	0.117707	0.0259932	0.0946722	0.154355	0.0838387	0.23929
KOR	0.0890053	0.0866984	0.0157371	0.0705813	0.111249	0.0565201	0.12488
RUS	0.0511449	0.0498095	0.0094065	0.0399587	0.0659137	0.0344703	0.0764143
PER	0.0692878	0.0676229	0.0139837	0.053686	0.0840491	0.0452743	0.118675
VNM	0.075276	0.0730968	0.0147705	0.057642	0.0957938	0.0443486	0.125936
PSE	0.126956	0.124579	0.0273853	0.0953056	0.16629	0.0661091	0.199821
TUN	0.0929586	0.0909245	0.0183626	0.0726793	0.114646	0.0666903	0.171593
NLD	0.112852	0.109915	0.0229441	0.081758	0.145015	0.0723158	0.185997
GTM	0.0762391	0.0766091	0.0139436	0.0585209	0.0946747	0.0450834	0.110535
URY	0.0711917	0.0695413	0.0148187	0.055798	0.0916666	0.0433827	0.129047
HRV	0.104175	0.102191	0.0234085	0.0777685	0.13265	0.0582502	0.203823
IDN	0.0774549	0.0744594	0.0158348	0.0592363	0.0966352	0.0507135	0.13708
LAO	0.0928399	0.0926675	0.0177896	0.0694787	0.114168	0.0554027	0.155913
GUY	0.0708975	0.0687892	0.0133184	0.0559908	0.0923904	0.0444527	0.105389
SLB	0.0820734	0.0799861	0.0162262	0.0618207	0.107276	0.0519305	0.118786
ISL	0.0986966	0.099058	0.0188246	0.0735885	0.123721	0.0609496	0.152811
MOZ	0.0916898	0.0884951	0.0197356	0.0682027	0.115031	0.0537119	0.159706
MLI	0.0864484	0.085742	0.0172778	0.0664851	0.110499	0.0557544	0.138011
PHL	0.0704564	0.0690654	0.0150425	0.0527841	0.0916931	0.0460144	0.109614
CAN	0.0891417	0.0875165	0.0164811	0.0703243	0.109899	0.0567336	0.152622
CMR	0.0838104	0.08284	0.014723	0.0650281	0.099864	0.0516109	0.12365
FJI	0.0855331	0.0832052	0.0182229	0.0632681	0.1104	0.0558859	0.135106
CIV	0.0688769	0.0657064	0.0143014	0.0536782	0.0887703	0.0409579	0.109093
TUR	0.098539	0.0972989	0.0192464	0.074877	0.119202	0.057301	0.167224
LBR	0.0870847	0.0856533	0.016974	0.0651507	0.110184	0.0522328	0.134476
BEN	0.0734425	0.0706528	0.0152821	0.0580996	0.0927542	0.0444568	0.143669

## Sheet: Stats_CuCl
	mean	median	std	p10	p90	min	max
ARG	0.171343	0.165539	0.0375323	0.126171	0.220006	0.0929519	0.280596
CHE	0.106268	0.10433	0.0207036	0.082618	0.136439	0.0622428	0.176974
USA	0.0976713	0.0967706	0.0215089	0.0716532	0.123531	0.0616081	0.167811
UKR	0.13639	0.135103	0.0288648	0.0988866	0.176179	0.075083	0.225718
IND	0.115016	0.113713	0.0231336	0.0889589	0.14658	0.071185	0.185491
ESP	0.156835	0.148341	0.0383809	0.122135	0.20511	0.0895469	0.305328
ARE	0.126749	0.122322	0.0279052	0.0940707	0.16353	0.0702708	0.209032
KOR	0.144363	0.137783	0.0328661	0.110329	0.194106	0.0825232	0.256541
HUN	0.116086	0.112392	0.0239062	0.0880035	0.147444	0.0731227	0.209201
RUS	0.10912	0.104167	0.0277087	0.0794214	0.155077	0.0649513	0.190542
FRA	0.0992904	0.0980699	0.0196624	0.0756509	0.123329	0.0594422	0.155423
ZAF	0.170303	0.16919	0.0336225	0.124483	0.218837	0.109026	0.257345
NLD	0.176334	0.174699	0.0381599	0.130561	0.232042	0.106002	0.274231
SVN	0.13166	0.130857	0.0280556	0.0986321	0.168233	0.0797521	0.22138
CZE	0.13082	0.128552	0.0272139	0.0959854	0.167168	0.081063	0.204353
IRN	0.185661	0.181858	0.0402721	0.136621	0.234603	0.0964998	0.355476
MEX	0.149793	0.140906	0.0388696	0.111316	0.199049	0.0677185	0.277652
JPN	0.204006	0.200296	0.0519416	0.147818	0.262383	0.102619	0.377936
BGR	0.116454	0.110997	0.0274274	0.0807565	0.15163	0.063768	0.199356
SWE	0.0837129	0.0814529	0.0183673	0.0657382	0.103811	0.0498076	0.164667
FIN	0.133994	0.132988	0.0303792	0.0982381	0.176877	0.0843902	0.218788
CAN	0.16927	0.16864	0.03652	0.12808	0.217401	0.0900702	0.264066
ROU	0.127173	0.12136	0.0301018	0.0946834	0.170062	0.080961	0.208507
SVK	0.232221	0.221757	0.0564335	0.172749	0.312902	0.123597	0.408985
GBR	0.159873	0.156787	0.0331982	0.117583	0.208664	0.100974	0.25478
PAK	0.15077	0.143212	0.0338158	0.115376	0.196209	0.0936336	0.269305
BRA	0.15182	0.139477	0.0390047	0.114702	0.199059	0.0829017	0.337535
CHN	0.142197	0.138155	0.0325926	0.102971	0.189374	0.0781197	0.230143
ARM	0.118276	0.116544	0.0274109	0.088075	0.152886	0.0630072	0.236389
BEL	0.162393	0.159739	0.0375264	0.12018	0.208656	0.0874501	0.279604

## Sheet: Stats_HB
	mean	median	std	p10	p90	min	max
CHE	0.347798	0.335027	0.101477	0.227537	0.473684	0.17548	0.651624
SLV	0.276266	0.275384	0.0722524	0.192085	0.375997	0.138057	0.463103
ARG	0.307124	0.286526	0.102187	0.204552	0.437158	0.172757	0.802563
PAN	0.243234	0.228876	0.074314	0.161117	0.332742	0.119432	0.530851
UKR	0.327636	0.309914	0.0953693	0.215522	0.475158	0.147082	0.556066
GEO	0.246296	0.235197	0.0701856	0.168363	0.353437	0.131395	0.448849
CUB	0.328941	0.326333	0.0899377	0.22578	0.421234	0.158405	0.670735
ECU	0.310042	0.309254	0.082454	0.211657	0.416152	0.144365	0.575707
DEU	0.290721	0.275855	0.0939989	0.183847	0.419846	0.13059	0.607768
BFA	0.233302	0.230277	0.0635432	0.152115	0.332318	0.134204	0.430901
MDG	0.207624	0.195775	0.0612645	0.140345	0.285768	0.0909509	0.434621
KGZ	0.270629	0.254135	0.0747488	0.195781	0.367172	0.147254	0.526303
IRQ	0.272453	0.267291	0.0857545	0.165696	0.379695	0.0934382	0.543145
SOM	0.244577	0.22082	0.0869591	0.164973	0.343622	0.111318	0.592001
NAM	0.218207	0.210167	0.056292	0.150963	0.281878	0.116157	0.420398
ARE	0.233625	0.221975	0.0656062	0.158356	0.325341	0.129075	0.431381
HUN	0.282448	0.268375	0.0905699	0.177572	0.410776	0.130793	0.538579
SEN	0.213963	0.204714	0.0626758	0.138471	0.308681	0.105731	0.394791
LBY	0.216576	0.212068	0.0750829	0.146872	0.281725	0.102013	0.575347
SDN	0.310597	0.294194	0.0709587	0.23173	0.412173	0.172575	0.49517
MYS	0.227552	0.212838	0.0706132	0.150029	0.335815	0.0827544	0.414521
SUR	0.279714	0.274344	0.0837153	0.181201	0.382032	0.143251	0.60084
BLZ	0.282918	0.269886	0.0874711	0.18717	0.396301	0.148466	0.573587
SVN	0.283068	0.267851	0.0858694	0.182238	0.394414	0.120776	0.521223
CZE	0.27648	0.257907	0.0894982	0.18238	0.368956	0.143931	0.672152
IRN	0.253706	0.242608	0.067374	0.186613	0.335157	0.1409	0.517946
SLE	0.238461	0.233713	0.0676393	0.164389	0.306142	0.0976727	0.475986
JOR	0.236457	0.225723	0.0715032	0.167468	0.324041	0.116285	0.581938
LTU	0.258994	0.24316	0.0788805	0.17089	0.375625	0.138908	0.554255
SWE	0.256733	0.247716	0.0754333	0.174175	0.354882	0.0979298	0.579902
POL	0.282637	0.270768	0.0791259	0.192102	0.398674	0.133341	0.567164
TZA	0.226824	0.21383	0.0683831	0.156675	0.310455	0.100149	0.43513
VEN	0.378814	0.362118	0.1173	0.24769	0.504194	0.188771	0.810564
KEN	0.240298	0.227516	0.0740332	0.15596	0.323878	0.100201	0.503722
SVK	0.275089	0.272458	0.0885558	0.178273	0.351154	0.128587	0.762795
GBR	0.283024	0.278518	0.0765346	0.188126	0.393152	0.147618	0.478723
MAR	0.245846	0.231159	0.0791364	0.163743	0.346239	0.10739	0.580552
AGO	0.22693	0.214072	0.0676135	0.157728	0.316069	0.110397	0.476275
KWT	0.205657	0.198884	0.0551564	0.145245	0.278211	0.128014	0.375352
UGA	0.232883	0.220732	0.0745207	0.145487	0.326539	0.124065	0.469085
KHM	0.251955	0.248149	0.0674937	0.171851	0.341148	0.108054	0.414323
COD	0.237169	0.218579	0.0798779	0.15623	0.342491	0.071088	0.499987
QAT	0.207939	0.200631	0.0709097	0.126925	0.305956	0.0764223	0.461791
BGD	0.254134	0.241387	0.0736685	0.171838	0.353478	0.127438	0.488604
GRC	0.30388	0.288952	0.102729	0.188315	0.449759	0.136319	0.62629
IND	0.268764	0.259433	0.0771915	0.166252	0.360673	0.116056	0.54207
MDA	0.281348	0.266322	0.0802471	0.188832	0.396438	0.111375	0.581665
GAB	0.261783	0.250561	0.0781781	0.174047	0.371164	0.144152	0.526931
MWI	0.260067	0.249089	0.0784974	0.173586	0.356644	0.13883	0.519633
EGY	0.260204	0.246956	0.0762114	0.17026	0.373155	0.0948971	0.473035
MNE	0.314384	0.301744	0.0953215	0.208213	0.427594	0.141974	0.763337
ZAF	0.20932	0.19949	0.0634576	0.136071	0.289344	0.0886737	0.42171
MKD	0.323336	0.311	0.0935356	0.207738	0.444797	0.146435	0.623828
BHS	0.236015	0.223338	0.0628158	0.161342	0.333755	0.138234	0.397031
ZWE	0.24945	0.236513	0.0718966	0.16867	0.343141	0.105502	0.427493
IRL	0.282023	0.267172	0.098387	0.174757	0.395124	0.141944	0.784472
LKA	0.290674	0.283175	0.0875022	0.194444	0.380689	0.131669	0.642943
SRB	0.303421	0.288389	0.0842879	0.210316	0.408343	0.170196	0.597509
COG	0.280232	0.262287	0.0915294	0.174712	0.402691	0.12977	0.557148
NZL	0.24081	0.226095	0.0731449	0.172273	0.332377	0.0988018	0.571765
LVA	0.257263	0.235317	0.0847497	0.167408	0.38782	0.125152	0.516516
AUS	0.251696	0.245118	0.0686825	0.174574	0.339325	0.112883	0.49749
FLK	0.283768	0.265277	0.0783519	0.199292	0.392405	0.152182	0.522643
ISR	0.234563	0.235265	0.0746502	0.149475	0.319583	0.12023	0.58013
COL	0.232408	0.21364	0.0770313	0.143616	0.336169	0.11102	0.450931
FIN	0.321188	0.300538	0.111258	0.203318	0.438806	0.156883	0.808274
GMB	0.22667	0.210629	0.0716263	0.155133	0.305927	0.0955858	0.490233
PRT	0.261976	0.252145	0.079606	0.179654	0.385276	0.107619	0.555689
SAU	0.253062	0.244861	0.0673348	0.178846	0.333889	0.131573	0.532078
PNG	0.246409	0.230893	0.0679321	0.174054	0.356681	0.135143	0.437186
JAM	0.253681	0.24485	0.069806	0.163302	0.348113	0.138314	0.441259
PAK	0.27755	0.276228	0.0832583	0.176899	0.371099	0.135426	0.630613
ZMB	0.249296	0.23765	0.079446	0.157304	0.337168	0.106715	0.578644
CHN	0.230047	0.217035	0.0654572	0.148892	0.326948	0.122092	0.415859
KAZ	0.237599	0.227763	0.0686388	0.159752	0.334307	0.0974404	0.452663
ARM	0.268694	0.253165	0.0734314	0.194187	0.364396	0.128356	0.547742
LUX	0.28336	0.264113	0.0895954	0.187821	0.380348	0.147314	0.653569
ALB	0.320283	0.304518	0.0930089	0.20781	0.436647	0.133945	0.622324
HND	0.268753	0.253205	0.0795891	0.173793	0.381335	0.120731	0.531703
NIC	0.255998	0.243985	0.0753555	0.175108	0.348662	0.0901026	0.529318
NER	0.242916	0.235376	0.0684927	0.15343	0.33896	0.134589	0.465986
ETH	0.27008	0.249422	0.0723866	0.181858	0.391788	0.14564	0.434062
GRL	0.327318	0.319325	0.0944852	0.207158	0.447418	0.147655	0.70202
OMN	0.265238	0.254288	0.0831837	0.171814	0.385453	0.121251	0.528552
ESP	0.300468	0.280524	0.10176	0.194845	0.436315	0.128888	0.681965
TJK	0.283873	0.263271	0.10013	0.176565	0.409481	0.142009	0.669201
YEM	0.303161	0.284363	0.0959475	0.194718	0.421525	0.110506	0.616856
THA	0.237324	0.226351	0.065917	0.166182	0.319569	0.107366	0.437843
UZB	0.267955	0.260974	0.0764976	0.180409	0.36664	0.111693	0.488584
DZA	0.230724	0.220267	0.0687523	0.148447	0.315388	0.0917089	0.458461
FRA	0.279368	0.270994	0.0736949	0.198819	0.374037	0.14207	0.491162
CRI	0.273219	0.258242	0.0833613	0.178944	0.396501	0.121991	0.492991
AUT	0.250076	0.239504	0.0732243	0.170677	0.34636	0.121463	0.50015
GHA	0.255327	0.243648	0.0674031	0.180048	0.33826	0.129602	0.523265
MEX	0.221209	0.209976	0.0668361	0.1462	0.309873	0.108345	0.435515
HTI	0.289968	0.284475	0.0689267	0.204852	0.378246	0.157295	0.485732
JPN	0.367791	0.356412	0.109848	0.255407	0.497574	0.184118	0.855069
NPL	0.246936	0.238092	0.0644046	0.164878	0.326321	0.119526	0.467196
BGR	0.286344	0.276276	0.0894907	0.185964	0.399427	0.131626	0.60319
DNK	0.258127	0.248441	0.0713918	0.17058	0.352467	0.134247	0.434247
MMR	0.289458	0.268985	0.104423	0.185461	0.424496	0.128114	0.625415
SWZ	0.216254	0.215265	0.0611771	0.140319	0.293349	0.0948023	0.46329
CYP	0.30951	0.292745	0.0977494	0.205024	0.407982	0.135623	0.831086
ROU	0.303157	0.286421	0.083971	0.20542	0.41217	0.159446	0.545762
DOM	0.251973	0.242235	0.0707439	0.164698	0.340297	0.12661	0.490607
BRA	0.230997	0.21663	0.0754227	0.140953	0.354167	0.113895	0.462936
ITA	0.274333	0.261295	0.0841218	0.175772	0.403894	0.127141	0.48206
SYR	0.313272	0.299004	0.087583	0.214882	0.424676	0.168334	0.642541
CHL	0.211137	0.196539	0.0632213	0.148316	0.296213	0.0961129	0.411831
BEL	0.280359	0.267464	0.0715878	0.198759	0.384141	0.132031	0.43469
EST	0.248186	0.248347	0.0662653	0.170607	0.330696	0.117113	0.42124
LBN	0.322048	0.315974	0.0854634	0.224353	0.418036	0.154144	0.568254
GIN	0.254206	0.24284	0.0785847	0.176813	0.36742	0.120356	0.520435
BRN	0.217453	0.21895	0.0511394	0.156582	0.284971	0.117977	0.325072
MNG	0.237735	0.234986	0.0651523	0.155699	0.326035	0.0849286	0.40396
PRY	0.222072	0.20795	0.0726287	0.156623	0.293716	0.10244	0.62253
USA	0.23538	0.226254	0.0739153	0.16415	0.335197	0.13274	0.55818
RWA	0.226733	0.217631	0.0700864	0.146095	0.308111	0.122435	0.42942
PRK	0.303943	0.285511	0.0871062	0.2026	0.436795	0.168338	0.516457
NGA	0.237089	0.226747	0.0649667	0.171644	0.332401	0.112665	0.502125
BWA	0.199244	0.185893	0.0715541	0.130937	0.308734	0.088141	0.471727
NOR	0.318186	0.308355	0.081565	0.218773	0.436541	0.149634	0.496651
BIH	0.359377	0.339435	0.106625	0.236599	0.515972	0.165389	0.743219
BOL	0.324603	0.32159	0.0933903	0.204441	0.42729	0.160228	0.67302
AZE	0.246223	0.25118	0.0715371	0.154965	0.335675	0.113636	0.428827
BLR	0.343744	0.325952	0.101878	0.242393	0.443737	0.178513	0.829631
KOR	0.25531	0.247686	0.0756099	0.16923	0.363975	0.123185	0.541949
RUS	0.253457	0.245044	0.0746577	0.15631	0.351285	0.123729	0.475426
PER	0.254545	0.24176	0.0784459	0.15931	0.36383	0.106886	0.442291
VNM	0.239051	0.234631	0.0658744	0.157785	0.325334	0.123454	0.409947
PSE	0.358662	0.338459	0.105958	0.239368	0.517774	0.15647	0.645222
TUN	0.285131	0.268841	0.081555	0.20493	0.385109	0.138726	0.590032
NLD	0.28154	0.260607	0.0836588	0.193832	0.391232	0.0865325	0.530363
GTM	0.259797	0.254642	0.0709323	0.170316	0.341239	0.128108	0.498847
URY	0.220501	0.215511	0.0607344	0.146958	0.306237	0.0866956	0.417383
HRV	0.28092	0.271634	0.0791691	0.185716	0.395569	0.141918	0.540268
IDN	0.243928	0.228813	0.0804435	0.154027	0.370585	0.109515	0.510503
LAO	0.26966	0.254292	0.0765004	0.189864	0.372751	0.107294	0.519294
GUY	0.230233	0.221613	0.069018	0.158649	0.31018	0.120365	0.549279
SLB	0.276804	0.249811	0.0983151	0.169702	0.421725	0.144264	0.527118
ISL	0.359828	0.337448	0.106946	0.241028	0.499623	0.199579	0.711754
MOZ	0.259823	0.246528	0.0733405	0.173326	0.359778	0.121669	0.517269
MLI	0.233524	0.22136	0.0637526	0.159403	0.324182	0.114009	0.446174
PHL	0.223524	0.20996	0.067065	0.150647	0.310284	0.119202	0.436695
CAN	0.256252	0.24199	0.0696715	0.174998	0.364567	0.140909	0.415967
CMR	0.23625	0.227667	0.06111	0.170065	0.312117	0.139593	0.463648
FJI	0.259262	0.251823	0.0672337	0.184613	0.342822	0.124282	0.52865
CIV	0.217362	0.208937	0.0611815	0.146354	0.298117	0.108741	0.422325
TUR	0.333891	0.315576	0.09325	0.220399	0.458064	0.193607	0.621301
LBR	0.259968	0.244108	0.0801506	0.169904	0.37762	0.120753	0.539311
BEN	0.225489	0.211452	0.0722112	0.151498	0.342131	0.111442	0.47231

## Sheet: Stats_HTL
	mean	median	std	p10	p90	min	max
CHE	0.25632	0.254849	0.0459705	0.206018	0.307449	0.153174	0.423998
SLV	0.179207	0.181017	0.0266384	0.141283	0.213925	0.117375	0.254657
ARG	0.205128	0.205593	0.0371424	0.154399	0.253957	0.125035	0.290421
PAN	0.155921	0.153281	0.0238315	0.127266	0.186839	0.09973	0.215582
UKR	0.227309	0.22335	0.0366624	0.188747	0.277969	0.147685	0.329643
GEO	0.125459	0.12388	0.0176582	0.105117	0.151653	0.0918305	0.180288
CUB	0.230876	0.225805	0.0390331	0.189005	0.289175	0.150644	0.357921
ECU	0.21013	0.209752	0.0354789	0.163207	0.258367	0.136889	0.303139
DEU	0.220355	0.214241	0.0368705	0.177685	0.260256	0.148768	0.362256
BFA	0.150976	0.148743	0.026233	0.117843	0.180555	0.100179	0.235773
MDG	0.132371	0.131818	0.0220921	0.104903	0.159655	0.0934938	0.19843
KGZ	0.156152	0.153345	0.0275226	0.121959	0.188915	0.106141	0.239227
IRQ	0.18377	0.178065	0.029211	0.149211	0.224031	0.130256	0.279403
SOM	0.199011	0.193588	0.0339558	0.157017	0.242161	0.131947	0.278059
NAM	0.150491	0.148429	0.0273005	0.117981	0.18409	0.0984532	0.252521
ARE	0.150394	0.150215	0.0220928	0.123788	0.17537	0.108045	0.219257
HUN	0.174169	0.17092	0.0264543	0.140181	0.208547	0.117721	0.257049
SEN	0.125117	0.121594	0.0223691	0.0989935	0.156697	0.0810297	0.178362
LBY	0.123526	0.122289	0.017877	0.100268	0.147817	0.0893243	0.178518
SDN	0.225647	0.223953	0.0452322	0.168709	0.284471	0.133364	0.355313
MYS	0.131896	0.131001	0.0198509	0.106614	0.159443	0.0928723	0.179151
SUR	0.156493	0.153249	0.0271868	0.123822	0.190487	0.111273	0.231581
BLZ	0.195836	0.191913	0.031139	0.162154	0.23521	0.121836	0.294818
SVN	0.202482	0.198811	0.0297922	0.16907	0.242014	0.141184	0.281934
CZE	0.153131	0.151579	0.024155	0.122857	0.185543	0.110696	0.228898
IRN	0.16948	0.16889	0.0264792	0.13843	0.204412	0.115751	0.234154
SLE	0.162288	0.160069	0.0254506	0.132844	0.193538	0.110397	0.257228
JOR	0.159908	0.159205	0.0236856	0.12924	0.192475	0.106981	0.230943
LTU	0.176947	0.174011	0.0292025	0.143815	0.212936	0.126888	0.281658
SWE	0.14271	0.14087	0.0198018	0.119241	0.168253	0.10114	0.206879
POL	0.188362	0.182784	0.0292044	0.151677	0.22809	0.137396	0.269739
TZA	0.130296	0.127139	0.0207276	0.105337	0.161349	0.0878215	0.201718
VEN	0.266129	0.261538	0.0477424	0.205706	0.327261	0.152351	0.391855
KEN	0.175489	0.173386	0.0260061	0.144115	0.210185	0.119891	0.240224
SVK	0.169913	0.169102	0.0250384	0.136988	0.197264	0.11805	0.253433
GBR	0.222751	0.217176	0.033058	0.184848	0.262524	0.16462	0.345516
MAR	0.136261	0.135613	0.0226644	0.11028	0.164297	0.0934851	0.211778
AGO	0.144261	0.141902	0.0219948	0.120015	0.178005	0.0934745	0.195688
KWT	0.122146	0.120492	0.0175515	0.0991723	0.14183	0.0869495	0.17336
UGA	0.136123	0.13285	0.0256838	0.105433	0.169496	0.0913957	0.220192
KHM	0.143143	0.141421	0.0229008	0.118369	0.171297	0.0952231	0.209933
COD	0.155058	0.154632	0.0254345	0.125258	0.185239	0.109518	0.238146
QAT	0.118217	0.116523	0.0159102	0.101092	0.13649	0.0836843	0.170426
BGD	0.158109	0.158649	0.0238509	0.126838	0.193276	0.103335	0.208976
GRC	0.195256	0.18788	0.033001	0.160081	0.24158	0.123623	0.288347
IND	0.123922	0.123046	0.0202385	0.10141	0.147883	0.0871458	0.188792
MDA	0.185213	0.186121	0.0264283	0.15168	0.221121	0.123544	0.249477
GAB	0.181112	0.178454	0.0310903	0.144037	0.217412	0.118512	0.269866
MWI	0.162178	0.161277	0.027171	0.132288	0.194515	0.102137	0.244921
EGY	0.173019	0.175999	0.0283842	0.137428	0.209014	0.110245	0.264001
MNE	0.190366	0.187273	0.0319731	0.152031	0.221542	0.129444	0.346716
ZAF	0.13436	0.130434	0.0224526	0.11015	0.167272	0.0919711	0.198952
MKD	0.169458	0.166303	0.028646	0.136454	0.207288	0.10645	0.263395
BHS	0.17317	0.172776	0.0259839	0.145102	0.204572	0.11044	0.234923
ZWE	0.166616	0.165061	0.0307571	0.126765	0.203672	0.0878305	0.273752
IRL	0.208798	0.204834	0.03335	0.168277	0.25075	0.151118	0.304001
LKA	0.200485	0.199283	0.0346035	0.160458	0.238689	0.12415	0.349688
SRB	0.177592	0.176248	0.02817	0.147631	0.211584	0.102634	0.286057
COG	0.176807	0.17514	0.0283693	0.140624	0.214761	0.119541	0.261796
NZL	0.20235	0.199711	0.0341659	0.159714	0.244026	0.128061	0.341845
LVA	0.173644	0.171196	0.024096	0.145493	0.208154	0.119044	0.239082
AUS	0.20621	0.204409	0.0333283	0.165128	0.248419	0.134885	0.28996
FLK	0.164814	0.164551	0.0255836	0.133885	0.195625	0.106952	0.248814
ISR	0.169713	0.167482	0.0260492	0.137838	0.200631	0.11792	0.261405
COL	0.131762	0.131141	0.0203092	0.10648	0.159867	0.0937562	0.18396
FIN	0.191968	0.190664	0.0283535	0.157964	0.231685	0.134982	0.263064
GMB	0.120697	0.120054	0.0169799	0.0991536	0.14246	0.0867518	0.165689
PRT	0.182643	0.181497	0.0254506	0.152143	0.217155	0.140606	0.284981
SAU	0.187358	0.17942	0.0288528	0.154933	0.226132	0.128202	0.287835
PNG	0.152617	0.149579	0.0268535	0.125201	0.186408	0.104806	0.25048
JAM	0.160033	0.155193	0.0267999	0.124896	0.198911	0.110345	0.233634
PAK	0.192005	0.189523	0.0306597	0.153981	0.230983	0.127331	0.272149
ZMB	0.167622	0.164424	0.031913	0.13023	0.217983	0.100921	0.255245
CHN	0.115198	0.113572	0.0180707	0.0954929	0.14068	0.0761558	0.159709
KAZ	0.13667	0.131927	0.019987	0.114026	0.16278	0.103987	0.201114
ARM	0.147926	0.14639	0.0211751	0.124715	0.17353	0.107472	0.241748
LUX	0.222835	0.21844	0.0354134	0.183172	0.265047	0.157976	0.343122
ALB	0.1656	0.16336	0.0236732	0.136294	0.194079	0.113219	0.253145
HND	0.171386	0.167332	0.0247674	0.142227	0.206711	0.123818	0.234109
NIC	0.146964	0.144475	0.0250638	0.114015	0.178703	0.0936163	0.22338
NER	0.169933	0.167071	0.0305294	0.132456	0.212366	0.0943276	0.243281
ETH	0.198116	0.191547	0.0331212	0.163203	0.242125	0.132788	0.321178
GRL	0.151744	0.14975	0.0215476	0.124065	0.18371	0.111534	0.208062
OMN	0.185924	0.18348	0.0305307	0.14816	0.220583	0.13118	0.28219
ESP	0.212813	0.20611	0.0339849	0.176816	0.258431	0.148364	0.323448
TJK	0.158174	0.154133	0.025258	0.128403	0.196616	0.100479	0.234243
YEM	0.220081	0.215554	0.0367352	0.17481	0.263569	0.150846	0.316987
THA	0.129445	0.127363	0.0195112	0.103837	0.158888	0.096164	0.186773
UZB	0.143193	0.142451	0.0204773	0.121272	0.168674	0.100686	0.196267
DZA	0.133424	0.131383	0.0214132	0.110412	0.158951	0.0862741	0.21969
FRA	0.219419	0.210882	0.0339672	0.181531	0.260679	0.149967	0.323227
CRI	0.170466	0.17137	0.0246474	0.140516	0.204024	0.122111	0.229303
AUT	0.150517	0.149382	0.020928	0.126344	0.173553	0.107639	0.213675
GHA	0.166239	0.160882	0.0304104	0.129663	0.207244	0.111149	0.267796
MEX	0.125135	0.124337	0.0197926	0.10206	0.150665	0.0880518	0.186222
HTI	0.195692	0.190683	0.0376387	0.151605	0.253381	0.124888	0.299796
JPN	0.224758	0.222499	0.0344894	0.181132	0.271021	0.164592	0.3625
NPL	0.147105	0.143822	0.0210944	0.123202	0.172258	0.107393	0.212159
BGR	0.168301	0.16457	0.022184	0.141823	0.201236	0.130386	0.24101
DNK	0.209729	0.206307	0.0310653	0.172458	0.249165	0.138453	0.296115
MMR	0.18684	0.185238	0.0341717	0.148561	0.229793	0.129297	0.295992
SWZ	0.131068	0.128049	0.0219533	0.107029	0.160485	0.0852977	0.196856
CYP	0.189163	0.188305	0.0270918	0.152925	0.223375	0.132428	0.269545
ROU	0.1961	0.192893	0.0276897	0.165603	0.231863	0.147732	0.272953
DOM	0.160385	0.159522	0.0250525	0.129055	0.193099	0.113648	0.219854
BRA	0.131219	0.129877	0.0194005	0.105959	0.157696	0.0884577	0.182007
ITA	0.168381	0.166529	0.0260368	0.134943	0.201412	0.11628	0.256383
SYR	0.238511	0.238773	0.0456551	0.182756	0.294071	0.159392	0.358638
CHL	0.13191	0.127821	0.0185783	0.111909	0.156198	0.100637	0.183697
BEL	0.21633	0.210614	0.0357697	0.176235	0.264489	0.143984	0.32593
EST	0.161954	0.159392	0.0226362	0.132786	0.189883	0.12142	0.231348
LBN	0.258596	0.254349	0.0458227	0.205257	0.320262	0.171253	0.393033
GIN	0.167082	0.164914	0.0295937	0.129134	0.203584	0.107866	0.249962
BRN	0.139234	0.136947	0.0202756	0.114142	0.168054	0.104044	0.201994
MNG	0.163116	0.161797	0.0266704	0.13271	0.196387	0.097416	0.232528
PRY	0.143766	0.144078	0.0242928	0.11143	0.175992	0.0960045	0.211814
USA	0.157756	0.15724	0.0229638	0.129209	0.187056	0.103806	0.207859
RWA	0.133106	0.128762	0.0249759	0.103692	0.166817	0.0879365	0.217551
PRK	0.223849	0.218479	0.0425079	0.169232	0.290199	0.144774	0.331732
NGA	0.155023	0.15479	0.0269366	0.118771	0.190008	0.0972418	0.217091
BWA	0.108774	0.108075	0.0145798	0.0921076	0.125801	0.0733983	0.150225
NOR	0.239478	0.233264	0.0401176	0.187631	0.290575	0.161883	0.355891
BIH	0.194721	0.19421	0.0327039	0.155661	0.237063	0.110974	0.29873
BOL	0.21224	0.208806	0.037642	0.170765	0.256305	0.138969	0.347961
AZE	0.154446	0.153287	0.0240927	0.126075	0.188315	0.103646	0.220375
BLR	0.274505	0.270566	0.0483316	0.221637	0.334709	0.174805	0.382953
KOR	0.188334	0.182406	0.0320947	0.154323	0.230065	0.113938	0.300726
RUS	0.147597	0.1485	0.0227536	0.120567	0.175757	0.101693	0.233767
PER	0.122498	0.120599	0.0166455	0.102794	0.145077	0.0932935	0.171984
VNM	0.145582	0.145254	0.0234652	0.117574	0.170448	0.101571	0.252476
PSE	0.272189	0.270121	0.049778	0.208005	0.326211	0.162464	0.448069
TUN	0.177182	0.175993	0.0298258	0.14045	0.214525	0.112449	0.264946
NLD	0.209792	0.199336	0.036223	0.168923	0.262414	0.149258	0.321419
GTM	0.160541	0.154899	0.0262531	0.135249	0.190053	0.0971	0.280855
URY	0.128134	0.125821	0.0188698	0.107087	0.152767	0.0934324	0.177891
HRV	0.179173	0.177866	0.0240871	0.150784	0.210853	0.136184	0.265283
IDN	0.146095	0.143372	0.0218301	0.121221	0.17197	0.103072	0.205623
LAO	0.184646	0.178095	0.0346727	0.145578	0.230229	0.120292	0.299535
GUY	0.128206	0.125552	0.0206219	0.104522	0.156685	0.0862997	0.20645
SLB	0.164496	0.158934	0.026966	0.130942	0.198045	0.114944	0.252424
ISL	0.218102	0.215399	0.032814	0.180444	0.254574	0.158587	0.358625
MOZ	0.169764	0.166983	0.0311892	0.130102	0.210824	0.107245	0.260379
MLI	0.162729	0.154821	0.0312579	0.131638	0.202312	0.112129	0.285068
PHL	0.125702	0.12386	0.0184762	0.101787	0.150514	0.0908265	0.169728
CAN	0.198567	0.192372	0.0327005	0.154821	0.243467	0.137674	0.294636
CMR	0.152355	0.149314	0.0296557	0.11891	0.195654	0.0992951	0.250017
FJI	0.173225	0.170019	0.0245899	0.142729	0.20619	0.121379	0.242498
CIV	0.126297	0.123924	0.0195452	0.104385	0.150834	0.0838166	0.180381
TUR	0.214551	0.207161	0.0330556	0.17693	0.258129	0.14744	0.320176
LBR	0.164404	0.167817	0.0262009	0.129756	0.195338	0.0974605	0.226173
BEN	0.13255	0.129851	0.0204054	0.106587	0.158034	0.0928086	0.184094

[truncated: 19 more sheets: Stats_HTSE, Stats_HVO_diesel, Stats_HVO_kerosene, Stats_M_PYR, Stats_PTM, Stats_RWGS_FT_diesel, Stats_RWGS_FT_kerosene, Stats_RWGS_MeOH_methanol, Stats_RWGS_MeOH_DME, Stats_RWGS_MeOH_kerosene, Stats_SMR_CCS, Stats_SOEC, Stats_SR_FT_diesel, Stats_SR_FT_kerosene, Stats_ST_FT_diesel, Stats_ST_FT_kerosene, Stats_TG_CCS, Stats_TG_FT_diesel, Stats_TG_FT_kerosene]
