# Supplementary material for: Global cost drivers and regional trade-offs for low-carbon fuels: a prospective techno-economic assessment
Source: Royal Society of Chemistry journal article supplement (doi:10.1039/d5ee05591a), 2026-01-01
Supplement: d5ee05591a2.zip [file monte_carlo_stats_Base50.xlsx]

## Sheet: Stats_PEM
	mean	median	std	p10	p90	min	max
CHE	0.148062	0.143219	0.0340812	0.110807	0.195487	0.0820427	0.250292
SLV	0.122575	0.117938	0.0324451	0.0892455	0.164269	0.0586692	0.236158
ARG	0.137593	0.131093	0.0331628	0.0968753	0.183236	0.0699311	0.26256
PAN	0.11126	0.107455	0.0284394	0.0817122	0.153395	0.0621475	0.194956
UKR	0.153245	0.150659	0.0403388	0.108043	0.195703	0.0778771	0.288793
GEO	0.116973	0.11319	0.0290564	0.0848097	0.154125	0.0558683	0.214314
CUB	0.148452	0.144007	0.0396988	0.10376	0.191783	0.082361	0.280593
ECU	0.140223	0.13741	0.0357975	0.0983094	0.185936	0.0785736	0.273274
DEU	0.104871	0.103219	0.0245586	0.0726975	0.135153	0.0562431	0.170938
BFA	0.110106	0.106557	0.0240902	0.0794746	0.140154	0.0609686	0.203482
MDG	0.103313	0.0970412	0.025251	0.0743738	0.140678	0.0578315	0.187446
KGZ	0.125954	0.120707	0.0341253	0.0897685	0.166669	0.0668061	0.239871
IRQ	0.117175	0.116484	0.0246429	0.0847051	0.151291	0.0630236	0.178787
SOM	0.107974	0.106477	0.0199607	0.0835228	0.137714	0.0713281	0.158916
NAM	0.0997594	0.0966936	0.0222804	0.0726813	0.129743	0.0529616	0.160493
ARE	0.0934504	0.0906061	0.0232834	0.0679096	0.126351	0.0516091	0.180049
HUN	0.114066	0.110129	0.0291995	0.0780127	0.152763	0.0587631	0.2097
SEN	0.0969586	0.0947661	0.0239552	0.0673377	0.125477	0.0523861	0.195193
LBY	0.0868631	0.0832151	0.0220481	0.0598455	0.115584	0.0485787	0.167427
SDN	0.133414	0.136147	0.0311607	0.0910064	0.1697	0.0662762	0.20647
MYS	0.118891	0.112424	0.0341914	0.0826955	0.156619	0.0468823	0.290349
SUR	0.122631	0.118164	0.0298939	0.0907341	0.161284	0.0709721	0.214936
BLZ	0.130129	0.126838	0.0353779	0.0970279	0.169441	0.0536443	0.275722
SVN	0.143064	0.135197	0.036137	0.106539	0.19601	0.071678	0.258991
CZE	0.113208	0.107668	0.0281038	0.083624	0.14651	0.0469674	0.18475
IRN	0.115962	0.111391	0.0325022	0.0802672	0.161661	0.0602173	0.243538
SLE	0.124319	0.118947	0.0332165	0.0885473	0.163236	0.061968	0.278396
JOR	0.101057	0.0994222	0.0245205	0.0693542	0.130442	0.0505545	0.165007
LTU	0.110293	0.104287	0.0305076	0.0769548	0.157529	0.0605062	0.216616
SWE	0.0968814	0.0921162	0.0223749	0.0733056	0.129251	0.0561816	0.185068
POL	0.112463	0.112225	0.0258179	0.0813477	0.146121	0.0618188	0.193547
TZA	0.105783	0.104011	0.026814	0.0753206	0.146142	0.05479	0.179721
VEN	0.173169	0.168067	0.0406183	0.126638	0.215218	0.0993876	0.322479
KEN	0.108567	0.104688	0.0284719	0.0768384	0.143752	0.0611844	0.245705
SVK	0.115514	0.114513	0.0259138	0.0852666	0.150692	0.0599896	0.21602
GBR	0.107837	0.103168	0.0235631	0.0816237	0.137902	0.0669869	0.189803
MAR	0.0955001	0.0912437	0.0238032	0.0698115	0.125765	0.0595775	0.184573
AGO	0.112362	0.108409	0.0271796	0.0809786	0.152948	0.0596664	0.203753
KWT	0.084854	0.0816335	0.0196621	0.065041	0.109156	0.0450972	0.143821
UGA	0.110749	0.107196	0.0279115	0.0773766	0.142037	0.049631	0.204151
KHM	0.114402	0.109271	0.0287389	0.0790676	0.156966	0.0592391	0.193636
COD	0.11136	0.106451	0.0276624	0.0799361	0.149088	0.062307	0.21068
QAT	0.0823639	0.0790861	0.021317	0.0562745	0.106285	0.0449842	0.148747
BGD	0.118218	0.111505	0.0320927	0.0824537	0.160919	0.0617246	0.221916
GRC	0.132524	0.127979	0.0360413	0.0958221	0.171284	0.0763406	0.336737
IND	0.107942	0.104119	0.0264564	0.0744514	0.137611	0.048773	0.187445
MDA	0.131587	0.125678	0.0344898	0.0958038	0.173709	0.0698472	0.256059
GAB	0.133129	0.129523	0.0320031	0.0960187	0.177904	0.0565793	0.217126
MWI	0.113837	0.111245	0.0283263	0.0778363	0.154694	0.0641306	0.188275
EGY	0.111421	0.107484	0.0279192	0.0787819	0.140415	0.0637634	0.208141
MNE	0.147996	0.143317	0.0378385	0.102607	0.196984	0.0846658	0.260721
ZAF	0.0911092	0.0906492	0.0232308	0.0604117	0.121618	0.0520469	0.164226
MKD	0.139873	0.12931	0.0446023	0.0892466	0.201703	0.063315	0.320361
BHS	0.107795	0.103785	0.0323629	0.0737334	0.143912	0.0472951	0.259428
ZWE	0.116721	0.111745	0.0303713	0.0796057	0.161685	0.0667752	0.221687
IRL	0.112539	0.107594	0.0319637	0.0841736	0.149982	0.065025	0.305648
LKA	0.134734	0.132672	0.0307708	0.0953118	0.17116	0.0708164	0.21005
SRB	0.136041	0.131417	0.0420079	0.0881514	0.19212	0.0648397	0.294559
COG	0.128351	0.125243	0.0257285	0.0949951	0.161811	0.0731173	0.183967
NZL	0.10343	0.100269	0.024129	0.0760377	0.136529	0.0538515	0.180779
LVA	0.11102	0.104531	0.0296294	0.0813799	0.149925	0.059037	0.21458
AUS	0.099624	0.0963186	0.0235457	0.0735261	0.125797	0.059896	0.218772
FLK	0.161196	0.160222	0.0445077	0.103855	0.228402	0.0748932	0.281795
ISR	0.102706	0.0965906	0.0298442	0.071708	0.145523	0.0536154	0.257809
COL	0.0988645	0.0981384	0.022462	0.0703355	0.130562	0.0497921	0.156634
FIN	0.164195	0.157268	0.0476374	0.107101	0.219283	0.0818077	0.293411
GMB	0.0922714	0.0889982	0.0189607	0.0704299	0.119066	0.0480182	0.139395
PRT	0.111039	0.10492	0.0291924	0.0761356	0.154437	0.0685218	0.206585
SAU	0.103586	0.102349	0.0237001	0.0723971	0.133917	0.0613943	0.169853
PNG	0.121102	0.117381	0.0300311	0.0814094	0.159566	0.0682052	0.232599
JAM	0.117145	0.113892	0.028688	0.0837939	0.149839	0.0632131	0.203412
PAK	0.13027	0.123386	0.0388528	0.0852649	0.185851	0.0649289	0.246271
ZMB	0.115312	0.111532	0.0266655	0.0849748	0.151889	0.0718096	0.203136
CHN	0.0921098	0.0911943	0.0215905	0.0665441	0.116982	0.047676	0.164179
KAZ	0.112525	0.110463	0.0298519	0.0759109	0.152171	0.0629402	0.200231
ARM	0.122675	0.11589	0.0340924	0.0876243	0.165499	0.0531642	0.217271
LUX	0.120492	0.118798	0.0292703	0.08036	0.156412	0.0634058	0.223557
ALB	0.138003	0.132238	0.0392246	0.100364	0.183658	0.0756233	0.326002
HND	0.114875	0.112759	0.031807	0.0819837	0.149955	0.0667113	0.253023
NIC	0.121162	0.113272	0.0337863	0.0877045	0.168538	0.0659173	0.240078
NER	0.100532	0.0983683	0.0255458	0.070806	0.130896	0.050459	0.188289
ETH	0.12824	0.125817	0.0286044	0.0939362	0.163541	0.0581317	0.228739
GRL	0.169633	0.159866	0.0522962	0.118938	0.234596	0.0967717	0.396126
OMN	0.106496	0.101574	0.026118	0.078506	0.137192	0.048298	0.180859
ESP	0.105673	0.103945	0.021128	0.0794718	0.136897	0.0529565	0.154402
TJK	0.127718	0.126978	0.0418339	0.0796142	0.173018	0.062317	0.343582
YEM	0.140435	0.135987	0.0378413	0.0986242	0.187158	0.0775795	0.315078
THA	0.107562	0.103905	0.0285788	0.0752587	0.145032	0.0576483	0.205672
UZB	0.119718	0.11495	0.0327875	0.0813854	0.162246	0.0565324	0.243234
DZA	0.102094	0.0967619	0.0260614	0.0756642	0.135497	0.0482568	0.19564
FRA	0.108199	0.106577	0.025702	0.0792624	0.137131	0.0563562	0.213061
CRI	0.121309	0.114017	0.0312573	0.0888882	0.166146	0.0704595	0.219948
AUT	0.105147	0.102155	0.027198	0.0746582	0.13814	0.0589164	0.201601
GHA	0.134139	0.128915	0.0372572	0.0955615	0.176263	0.0666486	0.308923
MEX	0.10427	0.0970762	0.0266369	0.0726328	0.145307	0.0650476	0.174461
HTI	0.12958	0.124632	0.0272207	0.0950747	0.166194	0.0631898	0.205337
JPN	0.161658	0.151945	0.0461596	0.108443	0.219725	0.0848375	0.300257
NPL	0.111242	0.10513	0.0353531	0.0755145	0.157217	0.0545742	0.26708
BGR	0.125143	0.118397	0.0395555	0.0902603	0.168046	0.0648068	0.349839
DNK	0.094701	0.0913162	0.0256104	0.0661829	0.124599	0.0462516	0.1907
MMR	0.137991	0.137105	0.0373642	0.0960297	0.186928	0.0671851	0.256147
SWZ	0.104032	0.098232	0.030199	0.0750955	0.130966	0.0511077	0.250326
CYP	0.136853	0.132274	0.036433	0.0981155	0.182713	0.0478782	0.29137
ROU	0.130932	0.124305	0.0346241	0.0925957	0.174935	0.0744641	0.26931
DOM	0.108237	0.102898	0.0268254	0.0809119	0.139742	0.0667835	0.225353
BRA	0.102012	0.095987	0.0241775	0.0762049	0.133461	0.0551014	0.184486
ITA	0.119884	0.114507	0.0300116	0.0881183	0.161509	0.0783978	0.28704
SYR	0.132465	0.13227	0.0305007	0.0906779	0.175565	0.0726046	0.214467
CHL	0.0828751	0.0777568	0.0220724	0.0616711	0.107745	0.0501607	0.175172
BEL	0.112242	0.109135	0.0252624	0.0808461	0.146454	0.0663191	0.189879
EST	0.108911	0.107395	0.0301444	0.0783657	0.131837	0.055997	0.222049
LBN	0.164744	0.163045	0.040856	0.109392	0.211122	0.0835931	0.275475
GIN	0.11528	0.113119	0.0246661	0.0877324	0.145579	0.071446	0.195386
BRN	0.105156	0.10041	0.0278339	0.0752154	0.141401	0.0597329	0.207281
MNG	0.107022	0.103264	0.0272204	0.0726683	0.149513	0.0627385	0.187743
PRY	0.0978367	0.092805	0.0265455	0.0709711	0.125582	0.0589613	0.197389
USA	0.0941796	0.0917978	0.0226663	0.066512	0.123856	0.0555688	0.171207
RWA	0.109735	0.10053	0.0315566	0.080316	0.150338	0.0659499	0.223399
PRK	0.134228	0.132766	0.0349205	0.0917783	0.185281	0.0712574	0.27076
NGA	0.109763	0.109297	0.0281635	0.076768	0.137745	0.0543663	0.255199
BWA	0.0879859	0.0838401	0.0254529	0.0566169	0.120949	0.047987	0.171142
NOR	0.15036	0.139443	0.0422097	0.10323	0.202937	0.089161	0.298719
BIH	0.154111	0.146438	0.039105	0.109271	0.208108	0.0795755	0.273342
BOL	0.135909	0.13007	0.0332891	0.1002	0.183014	0.074883	0.235042
AZE	0.121149	0.116712	0.0308421	0.0854459	0.164162	0.0524508	0.205402
BLR	0.171633	0.16895	0.0437791	0.125008	0.2186	0.0858814	0.395867
KOR	0.11899	0.112274	0.0315067	0.0844179	0.161897	0.0622769	0.220022
RUS	0.1195	0.112542	0.0288498	0.0896078	0.155373	0.0589549	0.209387
PER	0.106524	0.101911	0.0298683	0.0734762	0.14608	0.0588602	0.219112
VNM	0.111959	0.10687	0.029134	0.0794277	0.141992	0.0595744	0.234072
PSE	0.139442	0.138056	0.0315922	0.102532	0.183398	0.0853647	0.270072
TUN	0.11007	0.108208	0.0295595	0.0764786	0.146999	0.0537072	0.204075
NLD	0.10226	0.100492	0.0210326	0.0757365	0.132362	0.0638395	0.154598
GTM	0.114371	0.109013	0.0286593	0.0828905	0.147079	0.0662114	0.233373
URY	0.0869249	0.0805398	0.0235996	0.0633719	0.121378	0.0456828	0.174388
HRV	0.124137	0.118707	0.0315919	0.0901883	0.166025	0.0473358	0.233032
IDN	0.106905	0.105034	0.0247796	0.0746957	0.137631	0.0536841	0.184482
LAO	0.131991	0.131308	0.0348115	0.0860738	0.179703	0.0692061	0.229432
GUY	0.112366	0.106911	0.0282188	0.0830403	0.152851	0.0598104	0.206968
SLB	0.116643	0.114021	0.0299871	0.0821847	0.158986	0.0597525	0.23347
ISL	0.172216	0.16951	0.0431067	0.125203	0.229803	0.0825335	0.295875
MOZ	0.125565	0.121925	0.030027	0.0905904	0.163008	0.0689936	0.221104
MLI	0.099674	0.0970462	0.0257037	0.0700102	0.136113	0.0570497	0.172128
PHL	0.11253	0.109819	0.0279904	0.0792252	0.144251	0.0545034	0.201938
CAN	0.102837	0.0992522	0.0248583	0.0762753	0.132216	0.0504347	0.200892
CMR	0.120926	0.119305	0.0298276	0.0830441	0.160462	0.065411	0.200643
FJI	0.11318	0.11115	0.027387	0.0826178	0.144506	0.06676	0.232818
CIV	0.106893	0.104147	0.0257327	0.0755303	0.141099	0.0514509	0.177355
TUR	0.147419	0.147041	0.0372582	0.104567	0.1983	0.0734586	0.270653
LBR	0.122449	0.117528	0.0327944	0.0866592	0.160294	0.0693919	0.271868
BEN	0.110326	0.104824	0.0283726	0.0806042	0.148594	0.0659053	0.200589

## Sheet: Stats_DAC
	mean	median	std	p10	p90	min	max
CHE	0.32412	0.309223	0.0842009	0.230669	0.452244	0.167433	0.603802
SLV	0.212537	0.207728	0.0691115	0.143242	0.297407	0.0938271	0.482773
ARG	0.224769	0.213265	0.0623993	0.158812	0.307344	0.132411	0.513223
PAN	0.208464	0.196866	0.0667703	0.138221	0.279644	0.0941953	0.463783
UKR	0.243751	0.232217	0.058874	0.179686	0.335195	0.144679	0.398003
GEO	0.197179	0.181424	0.0670056	0.130401	0.295619	0.0925856	0.460922
CUB	0.246143	0.234981	0.0619584	0.171511	0.329589	0.12893	0.418235
ECU	0.236744	0.222272	0.0687885	0.1628	0.328605	0.0946188	0.489496
DEU	0.227935	0.216919	0.067095	0.158973	0.322669	0.125656	0.447038
BFA	0.193813	0.181671	0.061382	0.125375	0.282769	0.0907013	0.404027
MDG	0.161341	0.15055	0.0499861	0.111368	0.221824	0.0819816	0.33008
KGZ	0.208932	0.195989	0.0696603	0.135872	0.303354	0.0986674	0.420758
IRQ	0.205518	0.191943	0.0591164	0.136563	0.281993	0.107935	0.401785
SOM	0.164004	0.159823	0.0406517	0.112943	0.216241	0.0841776	0.275197
NAM	0.171599	0.165098	0.0490599	0.113884	0.237474	0.0813559	0.325856
ARE	0.185316	0.180726	0.0535496	0.123135	0.251721	0.0768536	0.326718
HUN	0.207767	0.195604	0.0549066	0.145132	0.277596	0.119305	0.387817
SEN	0.165667	0.151407	0.0631864	0.108154	0.23085	0.0692705	0.494181
LBY	0.172514	0.168139	0.0554362	0.112695	0.241779	0.0797173	0.368248
SDN	0.178628	0.167414	0.0550611	0.122371	0.254406	0.0857433	0.369682
MYS	0.214136	0.20543	0.0717214	0.138561	0.29606	0.122395	0.52511
SUR	0.202505	0.187617	0.0623773	0.138312	0.28844	0.106775	0.459162
BLZ	0.215564	0.201806	0.0662555	0.135725	0.327952	0.105687	0.420646
SVN	0.270823	0.264349	0.0796671	0.180347	0.37857	0.149786	0.603715
CZE	0.221039	0.207072	0.0615338	0.148484	0.295304	0.115393	0.420868
IRN	0.196401	0.180335	0.0622337	0.135095	0.276227	0.0704118	0.402595
SLE	0.193954	0.180762	0.0593611	0.121587	0.28316	0.104423	0.366295
JOR	0.181709	0.172516	0.0509285	0.121736	0.257337	0.091404	0.304938
LTU	0.212757	0.200853	0.0624328	0.137212	0.288412	0.109524	0.390626
SWE	0.180153	0.183206	0.0464291	0.120022	0.24126	0.0843473	0.326131
POL	0.215514	0.208417	0.0589408	0.153577	0.28451	0.10043	0.489673
TZA	0.196659	0.195235	0.0634279	0.124277	0.269854	0.0658848	0.39562
VEN	0.284966	0.261919	0.0912479	0.195654	0.408661	0.108867	0.576858
KEN	0.193645	0.18208	0.0633805	0.122795	0.28116	0.0838785	0.412064
SVK	0.216467	0.197805	0.0671955	0.15005	0.29815	0.109617	0.460748
GBR	0.221293	0.215035	0.0611926	0.158239	0.285728	0.121317	0.525075
MAR	0.176551	0.166852	0.0469683	0.130387	0.225249	0.09762	0.346688
AGO	0.182441	0.17951	0.0547317	0.117266	0.233805	0.0840347	0.364694
KWT	0.161795	0.163612	0.048456	0.104934	0.224535	0.0763384	0.306779
UGA	0.196981	0.187512	0.0603783	0.124299	0.287407	0.102822	0.386144
KHM	0.190609	0.180504	0.06207	0.122361	0.261462	0.0807621	0.365774
COD	0.191208	0.181622	0.0646061	0.121723	0.254904	0.101241	0.564468
QAT	0.162958	0.157022	0.0535378	0.101031	0.233355	0.0803983	0.356768
BGD	0.204114	0.19398	0.0619753	0.132199	0.292808	0.0821326	0.380004
GRC	0.252229	0.237331	0.0774172	0.172241	0.376119	0.118064	0.485833
IND	0.211518	0.194057	0.0641226	0.138501	0.30278	0.0955924	0.382469
MDA	0.224974	0.214212	0.0782053	0.142102	0.294625	0.112757	0.657848
GAB	0.204324	0.197248	0.0610138	0.127101	0.283533	0.101787	0.365662
MWI	0.187735	0.180353	0.0580572	0.126612	0.247239	0.0937986	0.438234
EGY	0.181572	0.175373	0.0466735	0.130928	0.242861	0.0930192	0.383728
MNE	0.285525	0.271585	0.0884344	0.182931	0.416793	0.140676	0.547651
ZAF	0.164329	0.159008	0.0445328	0.112379	0.222639	0.0583354	0.28513
MKD	0.265565	0.255071	0.0752204	0.176544	0.357543	0.107094	0.476736
BHS	0.197252	0.186083	0.0580815	0.126476	0.264862	0.110588	0.403202
ZWE	0.196133	0.184363	0.0579772	0.123634	0.275179	0.0903863	0.335408
IRL	0.218177	0.205477	0.0570641	0.156837	0.295724	0.112671	0.364606
LKA	0.217408	0.210705	0.0564926	0.152644	0.299854	0.125327	0.380426
SRB	0.249438	0.230938	0.0773561	0.169009	0.343826	0.102158	0.610272
COG	0.213472	0.205863	0.0722423	0.129118	0.279543	0.102339	0.476402
NZL	0.21054	0.196811	0.0601137	0.148475	0.288318	0.107018	0.531061
LVA	0.202668	0.194918	0.068825	0.137303	0.285491	0.0957665	0.558863
AUS	0.210091	0.209884	0.0473023	0.14808	0.270803	0.106724	0.349538
FLK	0.320058	0.307288	0.094861	0.201738	0.436305	0.154958	0.570243
ISR	0.195788	0.18871	0.0548553	0.13906	0.272207	0.103415	0.361753
COL	0.1785	0.165838	0.0510693	0.118046	0.257729	0.0944243	0.295315
FIN	0.310351	0.299164	0.0876441	0.209819	0.412829	0.170916	0.583447
GMB	0.162403	0.150005	0.056831	0.104197	0.222078	0.0787525	0.389091
PRT	0.213284	0.201694	0.0647798	0.144175	0.286103	0.10472	0.455605
SAU	0.201878	0.195497	0.0527907	0.144748	0.276622	0.101254	0.377368
PNG	0.207775	0.19001	0.0711485	0.133623	0.309847	0.067078	0.429825
JAM	0.216955	0.202107	0.0808437	0.145807	0.324002	0.0978931	0.694866
PAK	0.220894	0.209036	0.0631377	0.144156	0.317859	0.105441	0.469785
ZMB	0.19761	0.18775	0.0579975	0.130889	0.273706	0.0944179	0.370576
CHN	0.165174	0.157728	0.0521955	0.108541	0.228762	0.0900456	0.428951
KAZ	0.213322	0.205695	0.0630133	0.135982	0.307037	0.0811495	0.353569
ARM	0.217455	0.199968	0.0739191	0.144555	0.319352	0.097602	0.471791
LUX	0.245207	0.224568	0.0825748	0.155721	0.365354	0.0917223	0.451249
ALB	0.240948	0.226749	0.0788923	0.159002	0.338584	0.0854908	0.552275
HND	0.203282	0.197906	0.059277	0.139022	0.282689	0.0844901	0.384506
NIC	0.212769	0.203265	0.0635197	0.139639	0.296528	0.0939857	0.410527
NER	0.14351	0.138433	0.0386226	0.102636	0.187324	0.0747236	0.291104
ETH	0.220257	0.2161	0.0631305	0.144171	0.284637	0.103278	0.464794
GRL	0.31771	0.292226	0.106621	0.209317	0.469858	0.153727	0.765611
OMN	0.195368	0.185469	0.0534048	0.135972	0.278086	0.0864071	0.354062
ESP	0.212612	0.212783	0.0504222	0.152718	0.276209	0.111115	0.401723
TJK	0.201312	0.190746	0.0583444	0.136884	0.276013	0.0998522	0.39829
YEM	0.231021	0.2238	0.0677483	0.15097	0.314599	0.11903	0.448729
THA	0.194314	0.185957	0.067043	0.127405	0.264985	0.0832817	0.58317
UZB	0.207599	0.186624	0.0749346	0.134045	0.330229	0.0810861	0.509065
DZA	0.174682	0.167018	0.0565799	0.109462	0.242287	0.079441	0.372618
FRA	0.21313	0.204262	0.0617823	0.151467	0.294998	0.110863	0.462828
CRI	0.218716	0.200754	0.0578244	0.154523	0.302892	0.11898	0.393257
AUT	0.202889	0.194267	0.0719805	0.118509	0.302025	0.0965126	0.390549
GHA	0.207277	0.206685	0.0625912	0.124472	0.284424	0.097976	0.402302
MEX	0.190281	0.184154	0.0583839	0.132153	0.266155	0.0818355	0.429345
HTI	0.188847	0.177434	0.0551394	0.13119	0.264777	0.0908592	0.390491
JPN	0.348268	0.318176	0.122129	0.218084	0.511706	0.126577	0.717744
NPL	0.205287	0.19157	0.0712259	0.12312	0.300386	0.100539	0.442607
BGR	0.238291	0.238711	0.061058	0.166623	0.310161	0.115435	0.481905
DNK	0.186467	0.175438	0.0474739	0.132768	0.250477	0.0921742	0.33419
MMR	0.224896	0.205113	0.0769801	0.144293	0.33492	0.101987	0.47869
SWZ	0.168575	0.156816	0.056948	0.110277	0.247122	0.0706947	0.354407
CYP	0.269481	0.26668	0.0807677	0.171118	0.358291	0.126608	0.60018
ROU	0.266251	0.255388	0.0771109	0.177678	0.376255	0.138273	0.497671
DOM	0.203031	0.188637	0.0622091	0.139797	0.295979	0.0908807	0.479278
BRA	0.177901	0.172098	0.0511335	0.116413	0.24743	0.0766897	0.327302
ITA	0.238253	0.228119	0.0697807	0.153786	0.327634	0.112948	0.461924
SYR	0.184328	0.178334	0.0486742	0.133669	0.249559	0.07693	0.325602
CHL	0.151295	0.148052	0.0399682	0.105077	0.205587	0.0791411	0.286451
BEL	0.215149	0.207224	0.0544613	0.151291	0.30072	0.120073	0.374696
EST	0.212505	0.197007	0.0605724	0.145	0.283548	0.106777	0.393535
LBN	0.254122	0.233721	0.0882059	0.173756	0.362568	0.124226	0.611459
GIN	0.19424	0.182991	0.0583335	0.128951	0.269089	0.0872616	0.360354
BRN	0.196857	0.189768	0.0523835	0.137246	0.266738	0.105239	0.384668
MNG	0.177121	0.173223	0.0476852	0.11862	0.253242	0.0851149	0.283619
PRY	0.177179	0.171077	0.0527897	0.109681	0.24929	0.0960036	0.329071
USA	0.173336	0.169717	0.0447673	0.122291	0.234611	0.0946662	0.319529
RWA	0.18863	0.178487	0.0674126	0.1185	0.27874	0.0859713	0.375846
PRK	0.214694	0.203355	0.0619136	0.145012	0.296432	0.110983	0.401768
NGA	0.188816	0.183623	0.0509273	0.126773	0.256852	0.0970135	0.389929
BWA	0.148818	0.142338	0.0408607	0.101259	0.201	0.066317	0.249502
NOR	0.298193	0.295246	0.0714481	0.209018	0.406274	0.166704	0.447748
BIH	0.285811	0.276364	0.072257	0.204729	0.386727	0.143696	0.540981
BOL	0.223253	0.210393	0.0691988	0.147195	0.337131	0.120218	0.41469
AZE	0.216914	0.208836	0.0684822	0.139191	0.310695	0.106675	0.430151
BLR	0.262977	0.249746	0.0805499	0.172046	0.351955	0.114814	0.632857
KOR	0.235143	0.220055	0.0738531	0.150518	0.343536	0.121718	0.45652
RUS	0.220795	0.216089	0.0668116	0.151386	0.298982	0.0881427	0.444335
PER	0.184788	0.172639	0.0569718	0.122478	0.256274	0.0743538	0.375224
VNM	0.199879	0.181379	0.0759984	0.139384	0.286724	0.0942006	0.669608
PSE	0.200432	0.189892	0.0542841	0.143418	0.287809	0.113177	0.378698
TUN	0.183236	0.177078	0.0478704	0.124314	0.232803	0.0944594	0.350859
NLD	0.205652	0.200341	0.0612033	0.14174	0.28789	0.0871169	0.424809
GTM	0.224411	0.219615	0.0764633	0.145422	0.316644	0.107877	0.576018
URY	0.152317	0.142419	0.0458253	0.107798	0.199533	0.0814525	0.415534
HRV	0.242317	0.236987	0.0692268	0.154952	0.333285	0.11375	0.417189
IDN	0.20989	0.210931	0.0630455	0.134049	0.288833	0.105676	0.47645
LAO	0.203796	0.201476	0.067157	0.116957	0.302065	0.0999199	0.396248
GUY	0.197806	0.187092	0.0699838	0.127812	0.280598	0.0887244	0.615594
SLB	0.216393	0.200728	0.0645013	0.153801	0.299842	0.106776	0.512458
ISL	0.370073	0.345727	0.123458	0.240933	0.487939	0.194393	0.936183
MOZ	0.193799	0.186173	0.05399	0.131792	0.262509	0.101544	0.375834
MLI	0.153711	0.147201	0.0491077	0.0999313	0.214063	0.0820615	0.334725
PHL	0.207484	0.199513	0.0577667	0.139914	0.28684	0.111984	0.398315
CAN	0.204865	0.20403	0.0585216	0.131311	0.294195	0.0809779	0.36049
CMR	0.205397	0.191267	0.0722354	0.134976	0.297959	0.0978902	0.461871
FJI	0.20831	0.203347	0.0567237	0.139966	0.284751	0.110591	0.398235
CIV	0.190877	0.183594	0.0654817	0.118106	0.272463	0.0807575	0.428724
TUR	0.310264	0.289755	0.0968918	0.211635	0.451939	0.118657	0.697494
LBR	0.206975	0.194682	0.0663648	0.130209	0.293908	0.0912429	0.445492
BEN	0.190431	0.176433	0.0661231	0.121961	0.268165	0.0865293	0.409859

## Sheet: Stats_AD
	mean	median	std	p10	p90	min	max
CHE	0.140175	0.139997	0.0225603	0.110671	0.172327	0.0941293	0.204937
SLV	0.105269	0.10444	0.0146702	0.0880946	0.122948	0.0754599	0.162213
ARG	0.0999872	0.0992784	0.01996	0.0745112	0.124674	0.0579135	0.174318
PAN	0.0962862	0.0945846	0.0143923	0.0794354	0.11553	0.0712694	0.150731
UKR	0.130811	0.130164	0.0222551	0.107245	0.155493	0.0800699	0.197907
GEO	0.0854416	0.0837229	0.012895	0.0700281	0.104229	0.0586528	0.120039
CUB	0.124221	0.122914	0.0200127	0.100732	0.148425	0.0869809	0.178334
ECU	0.102221	0.0977897	0.0224967	0.0781838	0.133172	0.060215	0.173329
DEU	0.135676	0.135249	0.0202873	0.111854	0.162275	0.092542	0.190504
BFA	0.0810467	0.0793943	0.0141306	0.0636688	0.102688	0.0531595	0.112256
MDG	0.076191	0.0755188	0.0125173	0.0603806	0.0923303	0.045838	0.11018
KGZ	0.0963311	0.0942562	0.0166682	0.077222	0.118251	0.0651811	0.157445
IRQ	0.105793	0.103335	0.0162428	0.0860515	0.128487	0.0705659	0.14365
SOM	0.0956178	0.0946446	0.0172161	0.0754343	0.120545	0.058703	0.148436
NAM	0.0799749	0.078264	0.0129775	0.0637378	0.0965827	0.0558397	0.119721
ARE	0.0957676	0.0953633	0.0140301	0.0789378	0.116813	0.0705877	0.137463
HUN	0.103345	0.100666	0.0156587	0.0832056	0.123983	0.0702642	0.150154
SEN	0.0611602	0.0602449	0.0107147	0.0494824	0.0732313	0.0372929	0.0991732
LBY	0.0719476	0.0712037	0.0107129	0.0584733	0.0859028	0.0533934	0.101837
SDN	0.104745	0.105199	0.0194683	0.0778135	0.128054	0.063011	0.153912
MYS	0.0712942	0.0700084	0.0125326	0.0571183	0.0869178	0.0438845	0.113
SUR	0.0834078	0.0820373	0.0134344	0.0681888	0.100755	0.0513193	0.12694
BLZ	0.112017	0.110013	0.0166313	0.0933467	0.135682	0.0800073	0.160309
SVN	0.130136	0.128276	0.0179671	0.110435	0.156694	0.0886935	0.18393
CZE	0.0927124	0.0905382	0.0148729	0.0747949	0.113022	0.0667609	0.138909
IRN	0.0992786	0.0972505	0.0157294	0.0827559	0.118617	0.0707939	0.149099
SLE	0.0866084	0.0852215	0.0156157	0.0669877	0.107364	0.0534528	0.133263
JOR	0.0954728	0.0942458	0.0128624	0.0796257	0.11394	0.0702117	0.126571
LTU	0.105186	0.10434	0.0144934	0.0881433	0.125856	0.0776151	0.151076
SWE	0.0971306	0.0970624	0.0122728	0.0810183	0.113726	0.068472	0.126749
POL	0.111356	0.110581	0.0165546	0.0919635	0.131761	0.0754851	0.152079
TZA	0.0754107	0.0738055	0.0114496	0.061017	0.0892052	0.0509724	0.109299
VEN	0.118238	0.1157	0.0241249	0.0935245	0.155122	0.0694922	0.188193
KEN	0.114025	0.113164	0.0171813	0.0928914	0.136401	0.0873777	0.175267
SVK	0.116012	0.112818	0.01564	0.0981136	0.139341	0.0878505	0.158281
GBR	0.143033	0.141916	0.0195455	0.120914	0.169788	0.0952326	0.192787
MAR	0.0779193	0.0770232	0.012238	0.0642138	0.0949344	0.0522159	0.116569
AGO	0.080333	0.0797968	0.0138012	0.0630714	0.0977422	0.0494181	0.114914
KWT	0.0830709	0.0834781	0.0106518	0.0690145	0.0969981	0.0600964	0.110295
UGA	0.0667835	0.0654875	0.0117395	0.0527886	0.08147	0.0427384	0.113117
KHM	0.090523	0.0886439	0.0129696	0.0768709	0.109003	0.0638505	0.127645
COD	0.0939176	0.0944198	0.0129632	0.0780257	0.113176	0.0650444	0.126346
QAT	0.0810211	0.0811529	0.00985116	0.0686061	0.0922285	0.0570674	0.104006
BGD	0.0973174	0.096884	0.0142363	0.0812106	0.118812	0.0662999	0.131387
GRC	0.121279	0.119318	0.0179997	0.0991092	0.14373	0.0881131	0.185034
IND	0.0716983	0.0716035	0.0105363	0.0589731	0.0851638	0.0494006	0.0998388
MDA	0.107747	0.107718	0.0168789	0.08778	0.132203	0.0757902	0.154742
GAB	0.100212	0.100891	0.0181323	0.0779477	0.12089	0.0705814	0.163277
MWI	0.0845894	0.0832954	0.0148359	0.0661184	0.1054	0.0577526	0.133204
EGY	0.0828676	0.0802835	0.015628	0.0630552	0.10485	0.0474344	0.121856
MNE	0.112972	0.109858	0.0187313	0.0918074	0.137677	0.0706184	0.170045
ZAF	0.0756834	0.0765189	0.0117223	0.061615	0.0886702	0.0495403	0.113873
MKD	0.105547	0.106894	0.015204	0.084288	0.123181	0.0672061	0.153352
BHS	0.101899	0.102518	0.0157844	0.0821071	0.122574	0.0612009	0.146224
ZWE	0.0877488	0.0866995	0.0150666	0.0680552	0.106146	0.0522866	0.125727
IRL	0.133004	0.131544	0.019227	0.107609	0.159803	0.0939491	0.189946
LKA	0.111435	0.110615	0.0198548	0.0851203	0.135136	0.0656698	0.169538
SRB	0.107307	0.106423	0.0140304	0.0915465	0.124383	0.074355	0.151543
COG	0.0928733	0.0904835	0.0169883	0.0736353	0.115718	0.060304	0.138902
NZL	0.115544	0.115545	0.0182303	0.0920986	0.139119	0.0830576	0.165022
LVA	0.110946	0.10957	0.0141536	0.0924271	0.127788	0.0804502	0.156777
AUS	0.115764	0.11294	0.0183083	0.0954327	0.142658	0.0815096	0.16324
FLK	0.110092	0.107887	0.0183846	0.0906788	0.136152	0.0785059	0.165408
ISR	0.101285	0.100427	0.0143662	0.0822829	0.118017	0.0761718	0.137024
COL	0.0740136	0.0728026	0.0104863	0.0597501	0.0878326	0.0512226	0.102541
FIN	0.124482	0.122712	0.0177456	0.102897	0.146677	0.092292	0.187933
GMB	0.0702477	0.0694321	0.0112205	0.0568738	0.0824593	0.0436975	0.109657
PRT	0.118696	0.117199	0.0160201	0.100245	0.140991	0.0896164	0.170747
SAU	0.1098	0.109981	0.0173645	0.0872588	0.133605	0.0725725	0.155894
PNG	0.094111	0.0934044	0.0129869	0.0778438	0.112249	0.0653192	0.126914
JAM	0.0989397	0.0966335	0.0144723	0.0824624	0.120624	0.0685996	0.13861
PAK	0.10852	0.106038	0.0175625	0.0870525	0.130043	0.0691813	0.166367
ZMB	0.0866794	0.0836177	0.0149785	0.0691311	0.110083	0.057506	0.125153
CHN	0.0642294	0.063691	0.00969283	0.0514202	0.0765991	0.0471107	0.0976589
KAZ	0.0909718	0.0909582	0.0120944	0.0770577	0.107023	0.06559	0.137332
ARM	0.0960685	0.0944739	0.0130122	0.0813414	0.117691	0.0639256	0.129841
LUX	0.134424	0.130938	0.0200299	0.11032	0.164208	0.0948174	0.184318
ALB	0.101569	0.0992952	0.0161777	0.0821979	0.120345	0.0663507	0.15469
HND	0.102366	0.0992287	0.0167727	0.0828397	0.123324	0.069879	0.168284
NIC	0.0750465	0.0742982	0.0131815	0.0591467	0.0906413	0.0521996	0.144178
NER	0.0849124	0.0807172	0.0174725	0.0652049	0.10767	0.0501264	0.139215
ETH	0.0980774	0.0955745	0.0177682	0.077628	0.119471	0.0611348	0.147788
GRL	0.105324	0.103279	0.0161995	0.0856338	0.125713	0.0795798	0.158719
OMN	0.108207	0.109342	0.0158853	0.0876736	0.125674	0.0707905	0.156724
ESP	0.133854	0.13374	0.0178183	0.112857	0.156984	0.101523	0.183151
TJK	0.0971346	0.0972775	0.0160578	0.0779729	0.121334	0.0650044	0.139161
YEM	0.121331	0.119214	0.0209587	0.0974684	0.145251	0.0842391	0.224255
THA	0.0688909	0.0677452	0.0121128	0.053176	0.0854069	0.0411409	0.102938
UZB	0.0928003	0.0921689	0.0124571	0.0785817	0.110385	0.0629303	0.130646
DZA	0.0749832	0.0745415	0.0115258	0.0619395	0.088898	0.0538882	0.122668
FRA	0.1454	0.142183	0.019424	0.122528	0.173972	0.103494	0.198952
CRI	0.1031	0.102055	0.0150973	0.0830428	0.121886	0.0705151	0.156269
AUT	0.111079	0.110936	0.0123357	0.0945282	0.128078	0.0869275	0.14033
GHA	0.0948509	0.0935338	0.0161089	0.0766231	0.118558	0.0644364	0.135195
MEX	0.0679461	0.0666293	0.00961646	0.0564068	0.0813236	0.048915	0.0930185
HTI	0.1103	0.106967	0.0223947	0.0867657	0.1355	0.0664213	0.193151
JPN	0.168524	0.165621	0.0236464	0.142932	0.199397	0.124465	0.228974
NPL	0.0935015	0.0924635	0.0138541	0.0775609	0.111899	0.0657235	0.13747
BGR	0.114487	0.111545	0.0154209	0.0955875	0.131879	0.086136	0.171879
DNK	0.141998	0.143073	0.0195535	0.114653	0.167048	0.106186	0.182218
MMR	0.108663	0.106409	0.0201151	0.0835499	0.13286	0.0635071	0.175353
SWZ	0.0753736	0.076532	0.0125161	0.0588818	0.0905227	0.0524867	0.113369
CYP	0.124404	0.122294	0.0171805	0.101401	0.150409	0.0934308	0.172669
ROU	0.127096	0.126685	0.0167879	0.106999	0.148378	0.0927585	0.166866
DOM	0.098521	0.0980282	0.0129682	0.0819687	0.117524	0.0710566	0.129847
BRA	0.0720795	0.0718543	0.0103837	0.0589598	0.0834809	0.0531814	0.110869
ITA	0.105854	0.10399	0.0158825	0.0866076	0.130079	0.0752325	0.156161
SYR	0.121176	0.116355	0.0248224	0.0902844	0.151276	0.0793818	0.197291
CHL	0.071734	0.0710449	0.0110516	0.0579285	0.0865853	0.0468942	0.100277
BEL	0.130607	0.129477	0.0189992	0.108782	0.160355	0.0981964	0.179704
EST	0.109789	0.108277	0.0137896	0.0941384	0.12695	0.0720099	0.148319
LBN	0.129294	0.122298	0.0239585	0.104839	0.161055	0.0842369	0.222271
GIN	0.0838729	0.0825213	0.0147516	0.0656991	0.1039	0.0517784	0.119165
BRN	0.0932738	0.092783	0.012461	0.0775653	0.107295	0.0690684	0.134845
MNG	0.0964189	0.0963149	0.0148503	0.0790623	0.112866	0.0675978	0.16054
PRY	0.077239	0.0754342	0.0120027	0.0629894	0.0911949	0.0496345	0.113057
USA	0.101668	0.102056	0.0146865	0.081826	0.121762	0.0657411	0.13775
RWA	0.0748265	0.0745771	0.0123587	0.057061	0.0895403	0.0441137	0.113899
PRK	0.118334	0.116292	0.0229729	0.0932571	0.145044	0.0664292	0.198015
NGA	0.0812458	0.0804948	0.0150241	0.061503	0.0983058	0.0510703	0.127976
BWA	0.0670114	0.0661943	0.00992464	0.0538498	0.0769282	0.0461153	0.0960123
NOR	0.128936	0.126432	0.0209613	0.105205	0.157235	0.0902958	0.186283
BIH	0.113588	0.113852	0.0186465	0.0881119	0.132408	0.0804541	0.178972
BOL	0.10143	0.10117	0.0191979	0.080008	0.126774	0.0683033	0.15827
AZE	0.0994689	0.0974924	0.0144022	0.0834198	0.121219	0.0744557	0.132569
BLR	0.137163	0.13387	0.0238403	0.106734	0.167112	0.091585	0.218882
KOR	0.106297	0.105002	0.0168553	0.0857047	0.128763	0.0750703	0.16036
RUS	0.0946962	0.095227	0.0130828	0.0774565	0.111255	0.0684324	0.135504
PER	0.0712999	0.0712967	0.0118331	0.0553293	0.0845916	0.0412342	0.109696
VNM	0.0871474	0.0868111	0.0133521	0.0713942	0.102935	0.0526651	0.119286
PSE	0.13282	0.12898	0.0281839	0.0993696	0.172296	0.0908929	0.235538
TUN	0.0905632	0.0901584	0.0149246	0.0711093	0.107913	0.0597313	0.135279
NLD	0.125142	0.125774	0.0187595	0.102314	0.149908	0.0883796	0.170592
GTM	0.0991786	0.0973799	0.0135705	0.0836957	0.116272	0.0702704	0.137068
URY	0.0704804	0.0693665	0.0103102	0.0576577	0.0840753	0.0507342	0.0955913
HRV	0.118506	0.118121	0.0156188	0.100339	0.138765	0.0861468	0.161037
IDN	0.0889835	0.0883291	0.0140025	0.0719148	0.106928	0.0550945	0.128774
LAO	0.108993	0.106953	0.0186396	0.0860694	0.13313	0.0773224	0.17897
GUY	0.073978	0.0726914	0.01187	0.0585001	0.0920817	0.0534007	0.106847
SLB	0.0995038	0.100605	0.015996	0.0785876	0.119936	0.0632501	0.144427
ISL	0.130493	0.127981	0.0206138	0.107181	0.154898	0.09181	0.190876
MOZ	0.0871336	0.0865702	0.0167888	0.0641857	0.10991	0.0521129	0.134356
MLI	0.0829807	0.0816486	0.0152184	0.0629537	0.105527	0.0522007	0.126743
PHL	0.0803694	0.0788786	0.0115382	0.0662694	0.0923575	0.0554659	0.112018
CAN	0.120886	0.118508	0.017814	0.0982835	0.142677	0.0811156	0.165703
CMR	0.0855601	0.0821993	0.0144428	0.0715832	0.103494	0.0543352	0.134578
FJI	0.103372	0.10071	0.0155015	0.0857956	0.122755	0.067519	0.16883
CIV	0.073587	0.0714624	0.012097	0.0599828	0.0911366	0.0496189	0.115503
TUR	0.121123	0.118827	0.0184661	0.0982692	0.145768	0.0881861	0.179159
LBR	0.0846077	0.0840028	0.013134	0.068433	0.101425	0.0608088	0.12055
BEN	0.0772884	0.0773615	0.011328	0.0641792	0.0900913	0.0554282	0.108786

## Sheet: Stats_AE
	mean	median	std	p10	p90	min	max
CHE	0.131577	0.127838	0.0412566	0.0837561	0.181245	0.0681386	0.279318
SLV	0.11347	0.11519	0.0273315	0.0800641	0.1482	0.0555941	0.220459
ARG	0.127721	0.12217	0.0315681	0.0888326	0.169315	0.0706645	0.24456
PAN	0.0971561	0.0915004	0.0287639	0.0663432	0.134377	0.0488224	0.1964
UKR	0.136642	0.129809	0.033891	0.0968078	0.184616	0.0737364	0.231861
GEO	0.11342	0.107999	0.0344757	0.0758519	0.155692	0.06042	0.242678
CUB	0.130771	0.125688	0.0342634	0.0959631	0.166797	0.0725955	0.296817
ECU	0.13057	0.123136	0.0366525	0.0920323	0.168762	0.0589538	0.266363
DEU	0.0887537	0.0835788	0.0219438	0.065831	0.122156	0.047897	0.161924
BFA	0.103182	0.0976623	0.0294821	0.0721253	0.138211	0.0609302	0.228342
MDG	0.0933736	0.0906281	0.0259876	0.0630102	0.12829	0.0518722	0.183349
KGZ	0.116298	0.114267	0.0352627	0.0769715	0.158583	0.0600745	0.262237
IRQ	0.101963	0.0980413	0.0231009	0.0756648	0.132363	0.0588285	0.180884
SOM	0.0964105	0.0940748	0.025567	0.0660668	0.124012	0.0501927	0.216731
NAM	0.0900306	0.0844963	0.0277261	0.0610572	0.126128	0.0487576	0.25157
ARE	0.0857735	0.0826394	0.0253043	0.0597335	0.117916	0.0401103	0.169357
HUN	0.10204	0.0955931	0.0280256	0.0708717	0.140382	0.0526117	0.182564
SEN	0.0907976	0.0895359	0.022181	0.0633371	0.113864	0.0526474	0.15913
LBY	0.0822552	0.0827452	0.0217985	0.0549665	0.107382	0.043734	0.161131
SDN	0.119849	0.114874	0.0307691	0.08659	0.160092	0.0636871	0.235881
MYS	0.105995	0.10196	0.0276845	0.0742697	0.143612	0.0578253	0.18419
SUR	0.111386	0.107292	0.0323372	0.0759952	0.144758	0.0601898	0.246534
BLZ	0.119425	0.109984	0.0349027	0.0818789	0.175816	0.0694804	0.227288
SVN	0.126291	0.121087	0.0378491	0.084566	0.166496	0.0681637	0.296795
CZE	0.103183	0.10059	0.0289082	0.0654005	0.136591	0.0447943	0.197424
IRN	0.105414	0.102336	0.0288004	0.071375	0.138494	0.0593465	0.228744
SLE	0.112357	0.107389	0.0287205	0.0816149	0.151981	0.0499216	0.191788
JOR	0.0919633	0.0856077	0.0277093	0.0661726	0.123451	0.044197	0.213714
LTU	0.0967988	0.0914568	0.0248537	0.0714097	0.128378	0.0528952	0.168822
SWE	0.0988497	0.0931118	0.0323302	0.0645451	0.133747	0.0473511	0.214212
POL	0.0961131	0.0926984	0.0285114	0.0690768	0.140859	0.0456401	0.18413
TZA	0.0969218	0.0920709	0.0253743	0.0666041	0.130126	0.0434741	0.181469
VEN	0.160998	0.153103	0.051544	0.10359	0.224453	0.0782333	0.382839
KEN	0.108082	0.10486	0.0286004	0.0744689	0.144232	0.0527529	0.217014
SVK	0.114116	0.107829	0.0326936	0.0788795	0.156476	0.0609647	0.246151
GBR	0.0871177	0.0857982	0.0220455	0.0588939	0.118446	0.0463841	0.157496
MAR	0.0901228	0.0843711	0.0228247	0.0662247	0.116312	0.0541691	0.187906
AGO	0.103126	0.101709	0.0261213	0.071367	0.13594	0.0510893	0.189602
KWT	0.0845197	0.0799938	0.0264218	0.0536824	0.120049	0.0419641	0.162006
UGA	0.108831	0.104924	0.0358427	0.0683064	0.145663	0.0519041	0.236682
KHM	0.105992	0.104643	0.0273125	0.0736282	0.141855	0.051477	0.203864
COD	0.111859	0.104654	0.0319639	0.0774207	0.151723	0.0597779	0.227344
QAT	0.082804	0.0814583	0.0202849	0.0592146	0.104088	0.0478124	0.166102
BGD	0.1101	0.106509	0.0297068	0.0776931	0.144507	0.0448851	0.201759
GRC	0.12022	0.113363	0.0349263	0.0815646	0.161864	0.0560929	0.226642
IND	0.109867	0.10265	0.0299654	0.0752845	0.154036	0.0541673	0.201746
MDA	0.129195	0.125832	0.0388173	0.0804205	0.172086	0.067979	0.242728
GAB	0.120783	0.11779	0.0312019	0.0829144	0.162005	0.0549355	0.202632
MWI	0.103021	0.0977524	0.0287175	0.0704555	0.140899	0.0577412	0.185502
EGY	0.101418	0.0969354	0.0270737	0.0725156	0.136781	0.0405731	0.187177
MNE	0.136722	0.129756	0.0389667	0.0917675	0.181077	0.0791862	0.288659
ZAF	0.0846224	0.0796903	0.0237227	0.0602936	0.110522	0.044791	0.173887
MKD	0.134693	0.128185	0.0407114	0.0859727	0.197641	0.0561406	0.255469
BHS	0.0977839	0.0898125	0.0317545	0.0667974	0.137386	0.0486233	0.257425
ZWE	0.111106	0.105847	0.0298199	0.0765927	0.147463	0.0621852	0.259593
IRL	0.0912187	0.0895154	0.0201747	0.0686277	0.116404	0.0536456	0.155399
LKA	0.120312	0.116507	0.0305453	0.0852184	0.163009	0.0553345	0.210976
SRB	0.127732	0.121683	0.0398664	0.0809706	0.19081	0.0626251	0.286895
COG	0.1163	0.110111	0.0280068	0.0861219	0.15521	0.060607	0.214823
NZL	0.0902396	0.0846007	0.0274549	0.0603601	0.115929	0.0496788	0.215246
LVA	0.099125	0.0943088	0.0280702	0.0689078	0.141062	0.0526173	0.193648
AUS	0.0856849	0.0814473	0.0209477	0.0642087	0.110149	0.0469203	0.157059
FLK	0.162888	0.150428	0.0565981	0.104102	0.233271	0.0776227	0.432894
ISR	0.087965	0.0829518	0.0269811	0.060952	0.118878	0.0527119	0.211365
COL	0.0931153	0.0892828	0.0241904	0.0632792	0.123338	0.0412371	0.180289
FIN	0.148809	0.142893	0.0505597	0.0896638	0.211405	0.0706383	0.399402
GMB	0.0956927	0.092979	0.0247501	0.066963	0.127707	0.0498048	0.166969
PRT	0.10289	0.0940891	0.0304845	0.0710664	0.1471	0.0522729	0.212043
SAU	0.0909018	0.0853725	0.0247023	0.0666663	0.121665	0.0445829	0.168383
PNG	0.110634	0.104036	0.0305533	0.076227	0.146745	0.0543748	0.213459
JAM	0.106657	0.104788	0.0306649	0.0644886	0.144189	0.0490752	0.215868
PAK	0.125276	0.119196	0.0347304	0.0844559	0.175005	0.0659976	0.220178
ZMB	0.11504	0.11129	0.0274019	0.0819626	0.148137	0.0649962	0.184879
CHN	0.0831525	0.0774156	0.023599	0.0611076	0.112812	0.0445991	0.187159
KAZ	0.108402	0.102882	0.0348731	0.0709725	0.156391	0.0454119	0.23095
ARM	0.109382	0.0985977	0.0355746	0.076494	0.162353	0.0583491	0.233598
LUX	0.0985455	0.0942373	0.0275733	0.0672973	0.1322	0.0511529	0.197896
ALB	0.123367	0.121318	0.0315277	0.0869249	0.165115	0.0601283	0.20496
HND	0.109924	0.106848	0.0292589	0.0746105	0.147721	0.0533196	0.193074
NIC	0.113061	0.105019	0.0359042	0.0750221	0.160675	0.0582796	0.254584
NER	0.0964042	0.0969158	0.0229482	0.0666434	0.122812	0.0543166	0.175027
ETH	0.114939	0.113289	0.0259117	0.0807844	0.147289	0.0591919	0.197071
GRL	0.169489	0.153651	0.0634359	0.107711	0.247968	0.0611576	0.388535
OMN	0.0915755	0.0859158	0.0257974	0.0645335	0.120589	0.0415027	0.176702
ESP	0.093456	0.091745	0.023702	0.06388	0.122221	0.0511863	0.167699
TJK	0.112439	0.105615	0.033365	0.0766493	0.157432	0.0571589	0.206426
YEM	0.128434	0.12296	0.0388665	0.0886247	0.168868	0.0618706	0.297112
THA	0.0993634	0.0937521	0.0282425	0.0707003	0.136437	0.0534405	0.188021
UZB	0.110111	0.108457	0.0307764	0.0786851	0.141646	0.0535219	0.259237
DZA	0.0995667	0.0930283	0.027823	0.0689178	0.139217	0.0543888	0.177056
FRA	0.0951206	0.0909423	0.023676	0.0683557	0.125401	0.0529869	0.196443
CRI	0.107115	0.102978	0.0304622	0.0742747	0.156163	0.0518232	0.225527
AUT	0.0981905	0.0944949	0.0262163	0.0710022	0.134019	0.0517605	0.182014
GHA	0.119662	0.118223	0.0266684	0.0861529	0.156837	0.0673631	0.189577
MEX	0.106306	0.101372	0.0312024	0.0711607	0.149168	0.0442375	0.221412
HTI	0.117896	0.109738	0.0334904	0.0805193	0.156645	0.0678054	0.244006
JPN	0.16151	0.154342	0.0473342	0.104323	0.221515	0.084443	0.314526
NPL	0.106655	0.100441	0.0323233	0.071771	0.151007	0.0464587	0.197173
BGR	0.11132	0.106532	0.0324243	0.0767229	0.153341	0.0551461	0.242171
DNK	0.0872046	0.0843765	0.0221201	0.0633114	0.11419	0.0449427	0.160557
MMR	0.123657	0.122885	0.028691	0.0887438	0.156493	0.0558088	0.25273
SWZ	0.100178	0.0947355	0.0266193	0.0691817	0.136809	0.052466	0.18582
CYP	0.129787	0.126031	0.041269	0.0835965	0.178678	0.066537	0.306408
ROU	0.122862	0.119442	0.0298738	0.0896631	0.162669	0.0635081	0.208866
DOM	0.101856	0.0979271	0.026988	0.0708065	0.137241	0.0563424	0.19787
BRA	0.0959001	0.0915399	0.0291962	0.0622785	0.13003	0.0467816	0.211356
ITA	0.110237	0.100966	0.0314239	0.0779677	0.15943	0.0582284	0.204933
SYR	0.120826	0.115366	0.0297581	0.0867644	0.164847	0.0574562	0.226499
CHL	0.0762141	0.0744118	0.0193626	0.0542863	0.105464	0.0404151	0.148199
BEL	0.095775	0.0916497	0.0231204	0.0690054	0.122349	0.0473158	0.159051
EST	0.101408	0.0986301	0.0257592	0.0712344	0.132195	0.0512677	0.199257
LBN	0.152181	0.143472	0.0409631	0.105436	0.206303	0.067349	0.270067
GIN	0.114621	0.110335	0.0339193	0.077293	0.165216	0.0591985	0.213982
BRN	0.097934	0.0935376	0.026889	0.0646952	0.139685	0.0487713	0.174494
MNG	0.0963404	0.090069	0.0242214	0.0676347	0.1336	0.0510826	0.151196
PRY	0.0913443	0.0856546	0.0247423	0.0615639	0.127317	0.0473234	0.179751
USA	0.081574	0.0787587	0.0220229	0.0559139	0.10671	0.047853	0.175008
RWA	0.10099	0.094661	0.0272368	0.0715576	0.13928	0.0493003	0.181845
PRK	0.119866	0.117731	0.0290332	0.082752	0.161453	0.0684149	0.210726
NGA	0.108328	0.105671	0.0293177	0.0730021	0.143718	0.0526233	0.217294
BWA	0.081246	0.080017	0.0206714	0.0559627	0.107582	0.0471221	0.132748
NOR	0.127725	0.120792	0.0348427	0.0883985	0.17781	0.0616736	0.224251
BIH	0.148454	0.139229	0.040926	0.101219	0.208216	0.0799432	0.291125
BOL	0.12514	0.123001	0.0350479	0.0851289	0.169791	0.0643502	0.23866
AZE	0.11039	0.105975	0.0285344	0.0796522	0.14557	0.0493569	0.191191
BLR	0.153179	0.153599	0.0356692	0.10269	0.19804	0.0822589	0.239095
KOR	0.102063	0.0958797	0.027211	0.0733714	0.141991	0.0622962	0.210712
RUS	0.112648	0.103495	0.0333257	0.0785968	0.158532	0.0556323	0.24225
PER	0.0961079	0.093699	0.0260802	0.0649409	0.132792	0.0531395	0.163306
VNM	0.107377	0.103388	0.0311524	0.0709601	0.151629	0.0506736	0.196197
PSE	0.127234	0.128021	0.0265076	0.0910912	0.158388	0.0684589	0.189366
TUN	0.111195	0.105597	0.0283205	0.0783749	0.150142	0.0593321	0.191262
NLD	0.0852189	0.0839894	0.019831	0.0623756	0.110476	0.0471227	0.135965
GTM	0.106565	0.0995457	0.0320463	0.0733357	0.144952	0.0498116	0.237807
URY	0.0788967	0.0782689	0.0188599	0.0536968	0.101815	0.0411869	0.137016
HRV	0.111902	0.107461	0.0282528	0.0766279	0.146337	0.0578442	0.193396
IDN	0.0975506	0.0942213	0.0219535	0.0721423	0.121652	0.0556242	0.169813
LAO	0.119739	0.113065	0.0325192	0.0817636	0.169495	0.0674576	0.198128
GUY	0.107528	0.103054	0.0343986	0.0706245	0.152484	0.0487021	0.24259
SLB	0.121952	0.114832	0.0343948	0.0875438	0.169025	0.0633135	0.241641
ISL	0.171297	0.162405	0.0544235	0.111853	0.256231	0.0785939	0.345403
MOZ	0.108182	0.104978	0.0305209	0.0718277	0.147054	0.049572	0.237007
MLI	0.0919694	0.0883147	0.0220337	0.0680745	0.127645	0.0583529	0.156864
PHL	0.108812	0.0988987	0.0349413	0.070574	0.156674	0.0507312	0.221004
CAN	0.089543	0.0855307	0.0232243	0.0643406	0.117782	0.0539167	0.187008
CMR	0.108731	0.10333	0.0304713	0.0747401	0.154041	0.0590152	0.20403
FJI	0.100499	0.0966806	0.0292162	0.0667944	0.133019	0.0518818	0.217083
CIV	0.0977809	0.0923392	0.0290106	0.0699619	0.125968	0.0506972	0.202667
TUR	0.139541	0.139255	0.0327492	0.0986532	0.178158	0.0703682	0.256745
LBR	0.115456	0.109826	0.0328336	0.0796485	0.153895	0.0656608	0.254954
BEN	0.103078	0.101257	0.0270184	0.0740188	0.138477	0.0482834	0.18867

## Sheet: Stats_ATR_CCS
	mean	median	std	p10	p90	min	max
CHE	0.109617	0.108758	0.0211423	0.0847898	0.133265	0.067309	0.210722
SLV	0.0798288	0.0767218	0.0172741	0.0599577	0.105832	0.0496447	0.125594
ARG	0.0923134	0.0900424	0.0218798	0.0674701	0.115871	0.0573588	0.183172
PAN	0.0704562	0.0706544	0.0152493	0.0543771	0.0879794	0.0419639	0.119303
UKR	0.0960833	0.0931558	0.0220565	0.0698324	0.128942	0.0474018	0.15273
GEO	0.0603896	0.0583388	0.0143579	0.0434753	0.0786877	0.0382172	0.120823
CUB	0.0969563	0.0950092	0.0238205	0.0727976	0.120545	0.0585553	0.213821
ECU	0.0949408	0.094975	0.0202512	0.0723339	0.120631	0.0525995	0.167209
DEU	0.111713	0.107064	0.0246182	0.0836907	0.142461	0.0679027	0.185372
BFA	0.0725657	0.0699644	0.0167238	0.0542459	0.0944612	0.0409069	0.131248
MDG	0.0667306	0.0644372	0.0152819	0.0499786	0.0857026	0.035406	0.121985
KGZ	0.0704366	0.0685715	0.0161036	0.0502745	0.0891239	0.0421972	0.119012
IRQ	0.0796144	0.0794767	0.0156215	0.0595806	0.0998482	0.0511679	0.117498
SOM	0.0912828	0.0889354	0.0195242	0.0678641	0.115586	0.0485686	0.142723
NAM	0.0759659	0.0737123	0.0181185	0.056847	0.0982666	0.0462136	0.142202
ARE	0.0724678	0.0695648	0.0181152	0.0520295	0.0938031	0.0419915	0.142447
HUN	0.0978718	0.0916894	0.0310538	0.069337	0.130772	0.0526982	0.208806
SEN	0.0664393	0.0665491	0.0161546	0.0472747	0.0861384	0.0316239	0.112525
LBY	0.064538	0.0624585	0.015918	0.0476075	0.0847465	0.0366454	0.136415
SDN	0.0983738	0.0976182	0.0240772	0.0714955	0.130942	0.0462381	0.174202
MYS	0.0724636	0.070163	0.0149132	0.0561544	0.0928027	0.0492562	0.121369
SUR	0.0728943	0.0699944	0.0160478	0.0559526	0.0967812	0.03923	0.127531
BLZ	0.0859909	0.0830171	0.0188421	0.0644948	0.110439	0.054501	0.150888
SVN	0.10667	0.102814	0.0254759	0.0777481	0.135746	0.0595254	0.214298
CZE	0.0898789	0.0866075	0.0214735	0.0664906	0.120728	0.0557469	0.148817
IRN	0.0763543	0.0715896	0.0165335	0.0591529	0.096336	0.0471215	0.126028
SLE	0.0774882	0.07738	0.0177618	0.0550881	0.0991013	0.0489674	0.140058
JOR	0.0730023	0.0707171	0.0204288	0.0526231	0.0984929	0.0441324	0.14786
LTU	0.0981636	0.0953022	0.0253734	0.0692112	0.125224	0.0595475	0.199737
SWE	0.0822662	0.0803696	0.0198616	0.0602553	0.112301	0.0486856	0.148547
POL	0.102735	0.0984715	0.0259109	0.0732065	0.135094	0.0648591	0.199622
TZA	0.0656353	0.0645325	0.0137827	0.0506887	0.0818943	0.0380026	0.110512
VEN	0.112875	0.111746	0.0250447	0.0811244	0.1457	0.0716696	0.193721
KEN	0.0729095	0.0706617	0.0158679	0.0551466	0.0924302	0.0409036	0.11589
SVK	0.0924896	0.0865885	0.0230651	0.0673806	0.125578	0.0533206	0.16197
GBR	0.0914254	0.0880905	0.0196934	0.0703283	0.116846	0.0526809	0.170413
MAR	0.0722155	0.0715486	0.0166751	0.0529684	0.0945726	0.0353441	0.11588
AGO	0.0736809	0.0702548	0.0194659	0.0504652	0.102234	0.0381301	0.136687
KWT	0.0613097	0.0587656	0.0156476	0.0452254	0.0832434	0.0329703	0.126768
UGA	0.0708076	0.0674961	0.0184734	0.0500804	0.0949585	0.0348082	0.125834
KHM	0.0669135	0.0617167	0.0187052	0.047819	0.090849	0.0334257	0.14666
COD	0.0709438	0.0673907	0.0147454	0.0558359	0.0914276	0.0375386	0.123914
QAT	0.0580051	0.0545612	0.0148117	0.0432962	0.0734171	0.0357975	0.119941
BGD	0.0709553	0.0681368	0.0150102	0.0555416	0.088851	0.0449403	0.127233
GRC	0.106516	0.103207	0.0263536	0.0772053	0.142725	0.0587652	0.211385
IND	0.0633178	0.062832	0.0149018	0.0453026	0.0815204	0.0358291	0.120563
MDA	0.0835544	0.0802398	0.0198339	0.0626539	0.10735	0.0529353	0.15229
GAB	0.0819974	0.0795723	0.0187399	0.0605625	0.108255	0.0484844	0.152031
MWI	0.0760745	0.0712601	0.0196289	0.0542122	0.101682	0.0391466	0.137934
EGY	0.0846841	0.0814163	0.0194388	0.0627615	0.111692	0.0505896	0.15064
MNE	0.0855483	0.0843648	0.0188606	0.0623848	0.107823	0.0537696	0.136862
ZAF	0.0679721	0.0645282	0.0158552	0.0500148	0.087587	0.035949	0.118538
MKD	0.0787527	0.075883	0.0162047	0.0597618	0.100538	0.0463363	0.126969
BHS	0.0769335	0.0726259	0.0169399	0.0588252	0.103078	0.0506719	0.121861
ZWE	0.0789696	0.0750656	0.0196131	0.0581221	0.107839	0.0468535	0.15141
IRL	0.102584	0.103485	0.0226379	0.0756898	0.130178	0.0605783	0.176157
LKA	0.0849321	0.0820238	0.0195084	0.0641634	0.111367	0.0489192	0.149111
SRB	0.0804386	0.0769979	0.0168164	0.0607668	0.103243	0.0527816	0.129902
COG	0.0835617	0.0804164	0.022894	0.0586775	0.108731	0.0438495	0.196489
NZL	0.0896381	0.0886457	0.0181084	0.0669913	0.113303	0.0577205	0.150341
LVA	0.0940117	0.0883136	0.0252321	0.0682651	0.133387	0.0504855	0.164645
AUS	0.0914526	0.0848848	0.0231386	0.0702924	0.115258	0.0529974	0.17896
FLK	0.0798709	0.0751118	0.0174695	0.0607945	0.102351	0.0525467	0.144013
ISR	0.0770066	0.0765998	0.0176428	0.0552352	0.0989265	0.0423219	0.140886
COL	0.0688736	0.0645924	0.0167292	0.0522834	0.0888055	0.0399036	0.125489
FIN	0.104275	0.103599	0.0272554	0.0739506	0.137835	0.0429089	0.214638
GMB	0.0632357	0.0596074	0.0154962	0.0464853	0.080731	0.0381993	0.114922
PRT	0.0955552	0.0925105	0.024061	0.0664092	0.120858	0.0533879	0.175074
SAU	0.0835592	0.0801576	0.0173881	0.0650868	0.105309	0.054327	0.144429
PNG	0.0698453	0.0683555	0.0153298	0.0515196	0.0881151	0.0385325	0.122554
JAM	0.071878	0.0684037	0.0153948	0.056789	0.0906729	0.0423257	0.12112
PAK	0.0838768	0.0795161	0.0203571	0.064665	0.110351	0.0453334	0.159688
ZMB	0.0777548	0.0766855	0.0168847	0.0583526	0.100724	0.0464063	0.13017
CHN	0.0815021	0.0786815	0.0222655	0.0566234	0.109934	0.0405417	0.153901
KAZ	0.0644916	0.0604762	0.0153974	0.0466566	0.0815734	0.0399007	0.129595
ARM	0.0701017	0.0663939	0.0166617	0.0508637	0.0944609	0.039999	0.114351
LUX	0.108699	0.103987	0.0254046	0.083942	0.134527	0.0626619	0.22065
ALB	0.078315	0.0784409	0.014035	0.0599334	0.0955966	0.0531371	0.118246
HND	0.0779038	0.0761146	0.0190858	0.0581232	0.0997754	0.0508426	0.144232
NIC	0.0755978	0.0723718	0.01742	0.0568653	0.0988278	0.0480728	0.133176
NER	0.0792746	0.0773254	0.0198199	0.0561959	0.104912	0.0419364	0.151754
ETH	0.089476	0.0862504	0.0203217	0.0660889	0.115377	0.053568	0.151327
GRL	0.0767093	0.0720331	0.0178345	0.0592806	0.097326	0.0469439	0.149079
OMN	0.0827909	0.0810073	0.0177215	0.0639429	0.103612	0.049964	0.159589
ESP	0.104608	0.0988458	0.0263969	0.0773884	0.140155	0.0551025	0.18742
TJK	0.0732784	0.0724131	0.0155459	0.0540764	0.0933843	0.0442416	0.129078
YEM	0.0989604	0.0920456	0.0240891	0.073346	0.130526	0.0626736	0.179313
THA	0.0693056	0.0659886	0.0142601	0.0530917	0.0883473	0.0385996	0.11529
UZB	0.0684172	0.0665694	0.0168437	0.0479612	0.089716	0.0381981	0.120417
DZA	0.0655991	0.0617801	0.0161016	0.0483735	0.092009	0.0387526	0.106741
FRA	0.105728	0.100055	0.0275479	0.0733897	0.140469	0.0607192	0.21585
CRI	0.0798552	0.0764539	0.0175446	0.0624668	0.101321	0.052445	0.167997
AUT	0.0863114	0.0830737	0.0241277	0.0601463	0.1135	0.050383	0.195145
GHA	0.0760871	0.07147	0.0176489	0.0571979	0.0959191	0.0442378	0.139089
MEX	0.0666194	0.0656225	0.0148029	0.0494859	0.0825324	0.0409354	0.123233
HTI	0.087504	0.0868228	0.0199999	0.0620679	0.114297	0.0501075	0.137935
JPN	0.109492	0.105017	0.0266577	0.0769173	0.141469	0.0588459	0.207166
NPL	0.068362	0.0662508	0.0171613	0.0501439	0.0881497	0.0414038	0.14463
BGR	0.0909434	0.0881609	0.024741	0.0649161	0.128781	0.0516145	0.174375
DNK	0.102694	0.0967326	0.026065	0.07405	0.13437	0.0647247	0.208817
MMR	0.0826364	0.0802575	0.0182542	0.0618522	0.106332	0.0489518	0.143693
SWZ	0.0685984	0.0644581	0.0186599	0.0483702	0.0918073	0.0431578	0.128522
CYP	0.102732	0.0974494	0.0247256	0.0713432	0.136788	0.0541719	0.160247
ROU	0.102466	0.0964738	0.02546	0.0792231	0.131967	0.0506991	0.20743
DOM	0.0749503	0.0708067	0.0194019	0.0601434	0.0915607	0.0488712	0.214525
BRA	0.0684773	0.0658811	0.0170171	0.0512808	0.0844131	0.0419574	0.148582
ITA	0.0915529	0.088666	0.0207333	0.0666703	0.121216	0.0540521	0.144848
SYR	0.0986165	0.0949787	0.0277619	0.0697326	0.129425	0.050796	0.238967
CHL	0.0662415	0.0641052	0.0148871	0.0499936	0.0882875	0.0363334	0.119632
BEL	0.109472	0.105312	0.0275076	0.0772325	0.150008	0.051161	0.19988
EST	0.090322	0.0863534	0.0248491	0.0633279	0.120728	0.0487668	0.163332
LBN	0.105842	0.105553	0.0257364	0.0757536	0.135609	0.0562383	0.192451
GIN	0.0790967	0.0770656	0.0202449	0.0588002	0.105695	0.0387818	0.138749
BRN	0.0690764	0.0659523	0.0178816	0.0487315	0.0921618	0.0377945	0.12202
MNG	0.0760249	0.0733239	0.0201658	0.0545856	0.0957969	0.039267	0.165703
PRY	0.0699754	0.0680541	0.0156183	0.052298	0.0862262	0.0394869	0.124173
USA	0.0660076	0.0635523	0.0133808	0.0494377	0.0829772	0.0439285	0.117577
RWA	0.0664932	0.0659418	0.016141	0.0476799	0.0862615	0.0393887	0.121826
PRK	0.094809	0.0903969	0.0215613	0.0713693	0.119524	0.0588199	0.165288
NGA	0.0751258	0.0739929	0.0172733	0.0553424	0.0958506	0.0433753	0.133931
BWA	0.0602995	0.0574402	0.015883	0.0441884	0.082369	0.0349839	0.123123
NOR	0.103639	0.0966754	0.0253106	0.0769355	0.135258	0.0656552	0.208769
BIH	0.0859705	0.0838618	0.0163024	0.0674691	0.105275	0.0517719	0.13707
BOL	0.0938942	0.0939188	0.0203086	0.0687003	0.115233	0.058885	0.171633
AZE	0.0723095	0.0694464	0.0155272	0.0554683	0.0944992	0.0460512	0.118416
BLR	0.114403	0.111207	0.0256345	0.0816718	0.148141	0.0655421	0.195165
KOR	0.0858926	0.08206	0.0167381	0.0677505	0.107767	0.0503643	0.133568
RUS	0.0500962	0.0481556	0.0100963	0.0397657	0.0648161	0.0268544	0.0887455
PER	0.0643055	0.0600156	0.0168948	0.0459685	0.0877444	0.0352451	0.120647
VNM	0.0704419	0.0684577	0.0144454	0.0550043	0.087167	0.045527	0.123648
PSE	0.111097	0.108078	0.0292594	0.0803467	0.143913	0.0569033	0.236114
TUN	0.0799778	0.0787706	0.017468	0.0590447	0.100508	0.042988	0.149872
NLD	0.10911	0.104206	0.0272939	0.0749196	0.148807	0.0605021	0.200187
GTM	0.0713793	0.071101	0.0142949	0.052693	0.0907697	0.0408558	0.109102
URY	0.0678262	0.0664709	0.0141284	0.050876	0.0861865	0.0437761	0.113093
HRV	0.0951578	0.0891554	0.025997	0.0663399	0.126885	0.0583113	0.195916
IDN	0.0706001	0.0667054	0.0178	0.0519592	0.0901852	0.0371271	0.136039
LAO	0.082981	0.0795349	0.021444	0.0603301	0.109948	0.0514609	0.150834
GUY	0.0661875	0.0654729	0.0135041	0.0484633	0.0836323	0.0415839	0.107006
SLB	0.0756279	0.0736709	0.0171409	0.0557061	0.0987778	0.039452	0.117032
ISL	0.0977382	0.0953945	0.0183258	0.076951	0.124737	0.0472454	0.145646
MOZ	0.0800739	0.0768205	0.0168903	0.0589107	0.104162	0.049353	0.122256
MLI	0.0798111	0.0766371	0.0210927	0.056196	0.10742	0.0395753	0.150711
PHL	0.0654079	0.0636847	0.0141478	0.0479296	0.0824779	0.0340997	0.109334
CAN	0.0860908	0.0840439	0.0198538	0.0642396	0.104445	0.048223	0.194504
CMR	0.075271	0.0718391	0.020008	0.0528211	0.101275	0.0420545	0.134176
FJI	0.0775743	0.0753894	0.0166755	0.059722	0.098731	0.0505553	0.134535
CIV	0.0648716	0.0624491	0.0146751	0.0494221	0.0847521	0.0377822	0.131071
TUR	0.0932228	0.0911486	0.0183893	0.0708108	0.117657	0.0591432	0.140867
LBR	0.0794414	0.0754778	0.0216397	0.0559687	0.104522	0.0438497	0.158472
BEN	0.067853	0.0628454	0.017656	0.0497942	0.0924849	0.0392409	0.136931

## Sheet: Stats_B_PYR_kerosene
	mean	median	std	p10	p90	min	max
CHE	0.236647	0.228785	0.049746	0.183355	0.30125	0.164763	0.454907
SLV	0.181161	0.173023	0.0391571	0.138376	0.230657	0.12255	0.336128
ARG	0.193307	0.189153	0.0464518	0.140742	0.253533	0.119201	0.337781
PAN	0.163504	0.157413	0.0338633	0.130726	0.201338	0.0984323	0.281225
UKR	0.229207	0.225078	0.0425567	0.180947	0.284111	0.142505	0.353972
GEO	0.155848	0.151177	0.0339366	0.11702	0.207479	0.0887562	0.232931
CUB	0.22693	0.221574	0.0520558	0.165272	0.293282	0.132517	0.410919
ECU	0.191963	0.189286	0.0354046	0.150743	0.243878	0.14441	0.290582
DEU	0.203061	0.197609	0.0378945	0.158991	0.256294	0.130336	0.310658
BFA	0.157494	0.151561	0.0315716	0.121986	0.200837	0.0868887	0.256942
MDG	0.137704	0.134085	0.0262752	0.10615	0.175762	0.0763334	0.209325
KGZ	0.170473	0.167437	0.034514	0.135104	0.210149	0.0850261	0.288127
IRQ	0.183836	0.178336	0.0352281	0.145876	0.230447	0.115227	0.292627
SOM	0.176259	0.171921	0.035175	0.135446	0.225192	0.100311	0.277767
NAM	0.144408	0.145523	0.0240329	0.114452	0.173109	0.0898537	0.199782
ARE	0.155569	0.152257	0.0292313	0.126109	0.191175	0.0931763	0.296792
HUN	0.170793	0.168008	0.0316663	0.135287	0.207918	0.0919916	0.266169
SEN	0.117872	0.11188	0.0266944	0.0855429	0.150567	0.0673641	0.215204
LBY	0.128147	0.121365	0.0275609	0.100867	0.16179	0.0851703	0.242911
SDN	0.202088	0.194929	0.0438927	0.150624	0.257739	0.121135	0.353655
MYS	0.142579	0.138959	0.0307026	0.105473	0.180141	0.0866813	0.244285
SUR	0.161622	0.156584	0.0349113	0.124661	0.206349	0.100522	0.281171
BLZ	0.193146	0.18897	0.0361989	0.1455	0.236563	0.129734	0.309545
SVN	0.208836	0.205279	0.0388747	0.16211	0.261087	0.14426	0.326667
CZE	0.158894	0.157336	0.0287322	0.121326	0.19679	0.112115	0.260286
IRN	0.171643	0.164159	0.0335314	0.14151	0.225225	0.100055	0.257783
SLE	0.162314	0.155324	0.0345869	0.123103	0.201187	0.0970237	0.269009
JOR	0.158547	0.157707	0.0294769	0.124207	0.190295	0.0976254	0.281851
LTU	0.17562	0.170551	0.0363375	0.135396	0.209983	0.121725	0.320797
SWE	0.154899	0.152517	0.0268954	0.126656	0.185775	0.104822	0.254275
POL	0.177338	0.17528	0.0302469	0.141922	0.219302	0.128129	0.29631
TZA	0.141487	0.138425	0.0313169	0.106531	0.183626	0.086516	0.247858
VEN	0.247682	0.239483	0.0530688	0.188061	0.317409	0.171909	0.454907
KEN	0.184757	0.180949	0.0349668	0.1488	0.23649	0.107713	0.291942
SVK	0.187038	0.184167	0.0346403	0.148711	0.235802	0.116664	0.288812
GBR	0.207881	0.204403	0.0281	0.173509	0.23972	0.15703	0.3069
MAR	0.134867	0.134022	0.0242032	0.10406	0.165844	0.0862777	0.202891
AGO	0.15238	0.149356	0.0312391	0.111999	0.190543	0.0853614	0.257861
KWT	0.133154	0.129475	0.0218112	0.108689	0.160436	0.0917045	0.217612
UGA	0.137066	0.136924	0.026678	0.100595	0.171435	0.0914329	0.218761
KHM	0.156311	0.151517	0.0303888	0.122628	0.206567	0.0984016	0.274733
COD	0.161302	0.158667	0.0292646	0.126589	0.199147	0.107728	0.254637
QAT	0.133125	0.130978	0.0218309	0.108844	0.163213	0.0926023	0.204027
BGD	0.171793	0.165512	0.0359206	0.132854	0.219362	0.109072	0.312411
GRC	0.192784	0.190565	0.0343666	0.152457	0.23148	0.123723	0.313072
IND	0.137027	0.133721	0.0269559	0.102916	0.173635	0.0846001	0.223493
MDA	0.188435	0.179825	0.0342558	0.155392	0.237399	0.129878	0.292408
GAB	0.184357	0.179561	0.0350738	0.14498	0.230723	0.120493	0.304057
MWI	0.15884	0.154991	0.030627	0.121172	0.204992	0.0979173	0.228374
EGY	0.160132	0.157801	0.0326499	0.128082	0.195448	0.082916	0.316737
MNE	0.198547	0.194228	0.0352565	0.159353	0.240551	0.125317	0.332323
ZAF	0.132236	0.127861	0.0224487	0.10871	0.163532	0.0888388	0.200503
MKD	0.184566	0.178583	0.0375519	0.144362	0.225888	0.123329	0.335421
BHS	0.172045	0.165822	0.0322527	0.136802	0.222091	0.109101	0.262052
ZWE	0.15796	0.154474	0.0296935	0.123088	0.191364	0.0980466	0.262593
IRL	0.200833	0.194754	0.0320594	0.164522	0.244374	0.144367	0.294138
LKA	0.200496	0.196398	0.0458429	0.153687	0.244062	0.123355	0.403492
SRB	0.183352	0.181978	0.0325285	0.144364	0.234088	0.119704	0.262288
COG	0.179342	0.17884	0.0370485	0.132435	0.224171	0.106239	0.275751
NZL	0.184267	0.18568	0.0323153	0.14598	0.223389	0.117563	0.279744
LVA	0.178756	0.173379	0.0313153	0.145108	0.224717	0.116154	0.283017
AUS	0.182901	0.180251	0.032339	0.144738	0.221189	0.12831	0.30774
FLK	0.202648	0.191641	0.0442191	0.153992	0.268597	0.137162	0.332952
ISR	0.159345	0.154789	0.0310237	0.129118	0.200656	0.0936344	0.288471
COL	0.133804	0.132503	0.0280738	0.101461	0.16197	0.0907835	0.250332
FIN	0.211362	0.210084	0.0407777	0.164965	0.260351	0.131847	0.384215
GMB	0.128498	0.123013	0.0302641	0.100619	0.166459	0.088015	0.284247
PRT	0.187043	0.186051	0.0317503	0.146707	0.229145	0.123201	0.284085
SAU	0.172285	0.168788	0.0291333	0.137291	0.208647	0.116384	0.288639
PNG	0.168117	0.164223	0.0341279	0.132088	0.210302	0.11129	0.306983
JAM	0.168612	0.166843	0.0328343	0.130499	0.210323	0.115636	0.316494
PAK	0.186733	0.177871	0.0379519	0.143833	0.243455	0.120833	0.285702
ZMB	0.165747	0.163194	0.0352486	0.122571	0.21792	0.110248	0.267628
CHN	0.119304	0.115945	0.0229183	0.0889216	0.150546	0.078959	0.178865
KAZ	0.153911	0.148428	0.027901	0.12103	0.192195	0.10361	0.242414
ARM	0.161281	0.163746	0.0301976	0.122429	0.199325	0.0959554	0.267364
LUX	0.208601	0.197817	0.0396447	0.165044	0.252268	0.152114	0.364614
ALB	0.173344	0.165712	0.0315797	0.135172	0.217317	0.113782	0.270443
HND	0.173308	0.169074	0.0337092	0.134963	0.219912	0.115658	0.270177
NIC	0.155723	0.150449	0.0339741	0.121128	0.202615	0.0893548	0.255272
NER	0.153382	0.151221	0.0302577	0.11457	0.192306	0.0883182	0.251048
ETH	0.18464	0.181651	0.0309733	0.150309	0.226599	0.115558	0.258976
GRL	0.195747	0.194779	0.0368392	0.150694	0.235289	0.1196	0.318313
OMN	0.174905	0.174451	0.0296612	0.135088	0.212851	0.0977641	0.267956
ESP	0.19971	0.199599	0.032245	0.163946	0.235301	0.147402	0.320855
TJK	0.172823	0.169937	0.0347846	0.130203	0.220986	0.106692	0.273616
YEM	0.217696	0.211155	0.0493038	0.16213	0.288195	0.124461	0.409619
THA	0.137019	0.13424	0.0258645	0.106025	0.171751	0.0789479	0.216768
UZB	0.162132	0.160629	0.0350912	0.120364	0.21333	0.102572	0.293754
DZA	0.133315	0.133759	0.0237129	0.104753	0.159942	0.0905583	0.227358
FRA	0.205702	0.202959	0.0300015	0.167197	0.241875	0.128868	0.281883
CRI	0.170673	0.171248	0.034048	0.128657	0.209452	0.111146	0.318569
AUT	0.167931	0.165009	0.027499	0.136928	0.202508	0.113707	0.247466
GHA	0.172262	0.169098	0.0343648	0.131897	0.214138	0.104972	0.259758
MEX	0.129464	0.127951	0.0266471	0.0988638	0.160997	0.0777301	0.202546
HTI	0.198278	0.199883	0.0398457	0.149211	0.247543	0.116519	0.309315
JPN	0.253304	0.241741	0.0508033	0.190746	0.329133	0.177124	0.409889
NPL	0.158782	0.155336	0.0302451	0.126069	0.198379	0.0966243	0.280422
BGR	0.178687	0.17824	0.0270687	0.142757	0.205802	0.130084	0.296091
DNK	0.205134	0.205224	0.032411	0.160219	0.243359	0.119751	0.292924
MMR	0.198022	0.193638	0.0382812	0.150815	0.250534	0.120295	0.311323
SWZ	0.133152	0.128142	0.023436	0.107036	0.168745	0.0826777	0.192863
CYP	0.203653	0.19699	0.0428712	0.161742	0.257482	0.131881	0.393289
ROU	0.204064	0.195173	0.0402584	0.162316	0.254765	0.14157	0.347144
DOM	0.17273	0.167135	0.0317414	0.138829	0.221159	0.113815	0.279997
BRA	0.131784	0.132303	0.024149	0.102489	0.164863	0.0865784	0.197502
ITA	0.180955	0.179201	0.033851	0.142685	0.219943	0.120361	0.341993
SYR	0.214532	0.207585	0.0508727	0.154471	0.280803	0.107229	0.388636
CHL	0.128238	0.127498	0.0219427	0.101819	0.156863	0.0801162	0.186114
BEL	0.20164	0.202166	0.0358042	0.159746	0.24845	0.140602	0.313692
EST	0.168237	0.165461	0.0250289	0.137556	0.199808	0.122587	0.251762
LBN	0.23653	0.227967	0.0425258	0.189445	0.293269	0.152338	0.354319
GIN	0.157494	0.154252	0.0317105	0.12023	0.200197	0.0989419	0.238387
BRN	0.151918	0.151012	0.0235254	0.121342	0.1807	0.103395	0.216799
MNG	0.164462	0.160559	0.0289859	0.126923	0.202354	0.116365	0.264858
PRY	0.141804	0.139223	0.0283479	0.106288	0.181801	0.083758	0.215437
USA	0.154626	0.152435	0.0278435	0.12279	0.194819	0.102603	0.235506
RWA	0.139936	0.133982	0.0257564	0.106125	0.175495	0.092847	0.205409
PRK	0.204831	0.202404	0.0390008	0.154267	0.257148	0.135161	0.345291
NGA	0.160395	0.157336	0.0345583	0.121706	0.201028	0.0905898	0.306495
BWA	0.123432	0.120781	0.0228929	0.0977376	0.153896	0.0779	0.195414
NOR	0.224483	0.215485	0.0468284	0.170762	0.295908	0.145532	0.358732
BIH	0.201489	0.201136	0.0424901	0.151891	0.251605	0.122453	0.366211
BOL	0.194688	0.192663	0.0357736	0.151868	0.24326	0.126832	0.312561
AZE	0.173187	0.166927	0.0375959	0.133137	0.21188	0.109753	0.364287
BLR	0.256961	0.252171	0.0580854	0.194876	0.326349	0.146604	0.589969
KOR	0.175124	0.175655	0.0294184	0.138042	0.212728	0.106142	0.248474
RUS	0.162966	0.157727	0.0274477	0.132923	0.195101	0.110099	0.248506
PER	0.133348	0.131009	0.0266311	0.106192	0.168212	0.0807618	0.222316
VNM	0.155202	0.150829	0.0279868	0.124129	0.195141	0.0977225	0.244362
PSE	0.235507	0.226471	0.0489562	0.177881	0.299697	0.152762	0.4533
TUN	0.165439	0.158372	0.0338038	0.130098	0.218968	0.0994046	0.278482
NLD	0.188553	0.188181	0.0338069	0.151278	0.229992	0.125599	0.286714
GTM	0.165594	0.160256	0.032763	0.127021	0.206627	0.10757	0.287507
URY	0.124173	0.120385	0.0238274	0.0967095	0.153148	0.0858956	0.203166
HRV	0.190329	0.189234	0.0326302	0.14648	0.23542	0.124925	0.284718
IDN	0.152973	0.148862	0.0324057	0.119456	0.202304	0.0896881	0.275692
LAO	0.195414	0.189539	0.0479176	0.150175	0.24407	0.116815	0.43361
GUY	0.139005	0.131749	0.0316661	0.105262	0.170426	0.0913316	0.275941
SLB	0.174304	0.171693	0.0304412	0.139442	0.219001	0.110528	0.24782
ISL	0.239347	0.237874	0.0493096	0.180055	0.303236	0.140676	0.355729
MOZ	0.164799	0.1634	0.0344814	0.123947	0.207235	0.0793811	0.273561
MLI	0.155066	0.151838	0.0322353	0.117342	0.197069	0.0954552	0.252566
PHL	0.141464	0.136256	0.0304539	0.1062	0.182169	0.0930643	0.266522
CAN	0.186969	0.182032	0.0355622	0.144496	0.236401	0.115858	0.299582
CMR	0.157881	0.157608	0.0294761	0.121596	0.192447	0.0939283	0.261787
FJI	0.173499	0.168246	0.0329232	0.134389	0.222701	0.112475	0.269696
CIV	0.139886	0.136118	0.0271835	0.108467	0.175037	0.0826328	0.237177
TUR	0.211547	0.205559	0.0422781	0.167608	0.264169	0.1296	0.393038
LBR	0.166471	0.162924	0.032832	0.125906	0.202455	0.0924373	0.277265
BEN	0.144561	0.141363	0.033565	0.104308	0.189769	0.0789946	0.254973

## Sheet: Stats_CLR
	mean	median	std	p10	p90	min	max
CHE	0.100403	0.0982029	0.0229043	0.074691	0.132853	0.0483422	0.167208
SLV	0.0735936	0.0705193	0.0175695	0.0520945	0.0988946	0.0373133	0.132737
ARG	0.0829115	0.0810225	0.019841	0.0597041	0.109077	0.0474003	0.149974
PAN	0.0664659	0.0655561	0.0151445	0.0489178	0.0854206	0.0307393	0.11173
UKR	0.0856179	0.0799802	0.0197974	0.0640791	0.114235	0.0501354	0.147361
GEO	0.0587742	0.0578288	0.0132432	0.0436675	0.0755719	0.0321604	0.0950888
CUB	0.089132	0.0851302	0.0242881	0.0603409	0.12412	0.0444573	0.15802
ECU	0.0891321	0.0851006	0.0203844	0.0642474	0.119974	0.0533006	0.136369
DEU	0.1074	0.107852	0.0274235	0.0747281	0.144809	0.0499393	0.196637
BFA	0.0665937	0.0647698	0.0173326	0.0481305	0.0925753	0.0409919	0.112991
MDG	0.0602324	0.0570406	0.0171919	0.0434848	0.0822928	0.0295422	0.15245
KGZ	0.0674308	0.0642943	0.0197296	0.0468166	0.0959284	0.0376927	0.151229
IRQ	0.0754284	0.0745934	0.0180524	0.0560351	0.0991698	0.0393801	0.12554
SOM	0.0782013	0.0736632	0.0198918	0.054354	0.104644	0.0418015	0.14153
NAM	0.0701019	0.0677289	0.0174194	0.0495951	0.0956568	0.0349923	0.120468
ARE	0.0695677	0.0667632	0.0192033	0.0483306	0.0979612	0.0404111	0.149797
HUN	0.0910266	0.0884902	0.0253945	0.0631121	0.126435	0.0468322	0.177115
SEN	0.061853	0.0594378	0.0180088	0.0424842	0.080577	0.0307839	0.126079
LBY	0.0627935	0.0605989	0.0158174	0.0445118	0.0838951	0.0349606	0.103193
SDN	0.0876876	0.0831373	0.0264471	0.0586384	0.114094	0.0430023	0.181561
MYS	0.0695394	0.0640319	0.019697	0.0515332	0.0990965	0.0316767	0.14146
SUR	0.0712802	0.0667523	0.0189535	0.0510614	0.100609	0.0415699	0.146417
BLZ	0.0822893	0.0812463	0.0212574	0.0566955	0.111755	0.0447154	0.131999
SVN	0.100686	0.0981838	0.0246895	0.0735349	0.138261	0.0521919	0.188285
CZE	0.0876999	0.0827048	0.0237824	0.0598965	0.124532	0.0406824	0.148253
IRN	0.069966	0.0683632	0.0188075	0.0476266	0.0944083	0.0352337	0.122336
SLE	0.0735021	0.0701221	0.0197355	0.0507882	0.101559	0.0354226	0.1402
JOR	0.067548	0.0649916	0.0177475	0.0487614	0.0925696	0.0340661	0.125674
LTU	0.0919929	0.0894036	0.0212577	0.0678218	0.120037	0.0554795	0.154491
SWE	0.0892925	0.081879	0.0323166	0.0588166	0.124949	0.0430659	0.235025
POL	0.0989768	0.0933526	0.0271692	0.071004	0.133642	0.0436487	0.182134
TZA	0.0636389	0.0619094	0.0156193	0.0444664	0.0817636	0.0360134	0.110591
VEN	0.0984006	0.0953804	0.024222	0.0678561	0.134866	0.0550783	0.160578
KEN	0.0679459	0.0647853	0.0179784	0.0486969	0.0945759	0.0325433	0.116825
SVK	0.0891229	0.081794	0.0285245	0.061448	0.123411	0.0487609	0.233024
GBR	0.0853034	0.08256	0.019609	0.0609912	0.111636	0.0481841	0.132186
MAR	0.0646589	0.0597769	0.0159797	0.0483824	0.0866292	0.036796	0.119735
AGO	0.0675039	0.0646886	0.0194598	0.0474724	0.0922127	0.0337725	0.165646
KWT	0.0599113	0.0536607	0.020979	0.0397302	0.0894768	0.0338851	0.135144
UGA	0.064366	0.0620805	0.0159668	0.0470861	0.0872001	0.0343923	0.114514
KHM	0.060902	0.0592799	0.0178114	0.0410748	0.0805466	0.0323617	0.151655
COD	0.0658368	0.0637014	0.0166705	0.0468384	0.0863506	0.0313284	0.124114
QAT	0.0561874	0.0542799	0.0171684	0.0367908	0.0792153	0.0260679	0.106451
BGD	0.0663741	0.0638928	0.0166483	0.0483541	0.0861454	0.0353137	0.124083
GRC	0.100804	0.097689	0.0291208	0.0657991	0.139406	0.0527508	0.186319
IND	0.0595983	0.0560852	0.0159351	0.0418872	0.0860918	0.0288466	0.104995
MDA	0.0775091	0.071491	0.0197256	0.0581234	0.10222	0.0487159	0.149731
GAB	0.0764138	0.0750454	0.0188461	0.0549162	0.104377	0.0371569	0.131275
MWI	0.0694808	0.0676996	0.0181739	0.0493322	0.0902986	0.0355181	0.140566
EGY	0.0739042	0.0717245	0.0166526	0.0525619	0.0967837	0.0393979	0.117352
MNE	0.0801298	0.0773016	0.0197332	0.0557845	0.10537	0.0478042	0.144443
ZAF	0.0655981	0.0639133	0.0162147	0.0481434	0.0820864	0.0287063	0.143998
MKD	0.0724107	0.0697331	0.0190203	0.051495	0.0921074	0.0382428	0.160224
BHS	0.072634	0.0682369	0.0192781	0.0506082	0.0968357	0.043058	0.142602
ZWE	0.0720919	0.0685155	0.022363	0.0493345	0.0970439	0.0336983	0.158476
IRL	0.10264	0.0978299	0.0291666	0.074668	0.138642	0.0498459	0.231361
LKA	0.0808859	0.078829	0.0234677	0.0562452	0.11144	0.0433173	0.187411
SRB	0.0740501	0.0703072	0.0204504	0.0534268	0.0983481	0.0449217	0.149215
COG	0.0758372	0.0735191	0.0204341	0.055773	0.098447	0.044324	0.186687
NZL	0.0818939	0.0800514	0.0186076	0.061494	0.109409	0.0396338	0.146302
LVA	0.0941631	0.0897084	0.0252276	0.0648859	0.121019	0.0551537	0.165808
AUS	0.0861957	0.0836299	0.0223673	0.0617799	0.117419	0.041631	0.170506
FLK	0.0729481	0.0678698	0.0183089	0.0547727	0.0986314	0.0386505	0.128118
ISR	0.0758749	0.0710556	0.0204106	0.0544336	0.103308	0.0335812	0.140796
COL	0.0637464	0.0590466	0.0158582	0.0463277	0.0890447	0.0365817	0.101218
FIN	0.100644	0.0951219	0.0271741	0.0726557	0.131695	0.0604888	0.186864
GMB	0.0634988	0.0571173	0.0275037	0.0405376	0.0874342	0.0313402	0.240841
PRT	0.0969824	0.0948413	0.0279595	0.0640088	0.134618	0.0456792	0.180336
SAU	0.0780016	0.0763888	0.0193535	0.0565119	0.106908	0.0447787	0.14565
PNG	0.0671046	0.0639056	0.0161785	0.0493937	0.0885832	0.0330958	0.113423
JAM	0.0690366	0.0667246	0.018292	0.0467039	0.0925051	0.039381	0.138638
PAK	0.0746661	0.0729671	0.0169435	0.0534838	0.0989198	0.0438865	0.123204
ZMB	0.0703879	0.0674479	0.0182116	0.0497497	0.0975074	0.0397726	0.125544
CHN	0.0810188	0.0758539	0.0289604	0.0536247	0.110955	0.0345394	0.209357
KAZ	0.062733	0.0614204	0.0139421	0.0465357	0.0811475	0.0308481	0.103573
ARM	0.0659968	0.06608	0.0164407	0.0468943	0.0870302	0.0322246	0.134321
LUX	0.105638	0.098437	0.028599	0.0713983	0.141341	0.0574283	0.194537
ALB	0.0712189	0.0694573	0.0221932	0.0520748	0.0920449	0.0338361	0.214951
HND	0.0714399	0.0685665	0.0175701	0.0499391	0.0936257	0.0402627	0.121769
NIC	0.0689277	0.0673509	0.0173736	0.0483495	0.0912233	0.0414609	0.143872
NER	0.0724119	0.0698908	0.0182175	0.0527275	0.0951634	0.0374259	0.131095
ETH	0.0798925	0.0766478	0.0194123	0.0565769	0.102474	0.0409236	0.151766
GRL	0.0673526	0.0638806	0.0159868	0.0499519	0.0900538	0.0376963	0.116744
OMN	0.0805456	0.0790097	0.0192273	0.056835	0.106175	0.0470045	0.156425
ESP	0.0999619	0.0919516	0.0308477	0.065793	0.140669	0.0456522	0.195969
TJK	0.067205	0.0628683	0.0205241	0.0469784	0.0977204	0.036382	0.13469
YEM	0.0840409	0.0803126	0.0185499	0.0614909	0.112734	0.0485483	0.136713
THA	0.0648867	0.0639986	0.0147825	0.0456826	0.0817395	0.0391289	0.114927
UZB	0.0623242	0.0581081	0.0154165	0.0463122	0.0832956	0.0368802	0.106558
DZA	0.0612079	0.0580659	0.0162516	0.0446086	0.0815268	0.0305689	0.129496
FRA	0.104561	0.0979332	0.0327109	0.069918	0.148165	0.053529	0.216398
CRI	0.0720907	0.069335	0.015476	0.0549019	0.0920332	0.0441429	0.142008
AUT	0.085235	0.0791069	0.0271173	0.0538627	0.123844	0.0364819	0.164972
GHA	0.0714315	0.0703057	0.0176339	0.0508046	0.0931743	0.0371454	0.127939
MEX	0.0609897	0.0596714	0.0158796	0.044281	0.0836584	0.0303545	0.110024
HTI	0.076912	0.0726085	0.0210411	0.0546041	0.105653	0.0392744	0.146204
JPN	0.103504	0.100504	0.0280557	0.0725345	0.144737	0.0478701	0.172044
NPL	0.0656632	0.0626063	0.0167165	0.0479056	0.0872901	0.0285208	0.133275
BGR	0.0901333	0.0839415	0.0279935	0.0619706	0.12949	0.0425209	0.183427
DNK	0.099338	0.0968367	0.0273122	0.0688049	0.132761	0.0520596	0.199765
MMR	0.0756816	0.0739165	0.018327	0.0516808	0.0963817	0.0450961	0.13247
SWZ	0.061841	0.058946	0.016224	0.0451515	0.0810761	0.0354276	0.126654
CYP	0.0945057	0.0927731	0.0228952	0.0693424	0.122193	0.0402913	0.160655
ROU	0.10246	0.095313	0.0328526	0.0675763	0.139596	0.0444564	0.231434
DOM	0.0671341	0.0659458	0.0149082	0.0479431	0.0858873	0.0375319	0.116243
BRA	0.0632182	0.0614838	0.0158453	0.0433276	0.0828006	0.0339973	0.119308
ITA	0.0954966	0.0897473	0.0271173	0.066765	0.131252	0.0475025	0.207111
SYR	0.0882741	0.0878956	0.0228582	0.0605822	0.11747	0.045935	0.162943
CHL	0.0662008	0.0643562	0.0169382	0.0467849	0.0910888	0.0345126	0.109407
BEL	0.107993	0.103625	0.0312553	0.0783666	0.149978	0.0521765	0.213513
EST	0.0894564	0.0846477	0.0306786	0.0618097	0.121483	0.0432946	0.266952
LBN	0.0957997	0.0909868	0.0259421	0.0632947	0.130114	0.0504057	0.172103
GIN	0.0725874	0.0692295	0.0200598	0.05055	0.0976284	0.041088	0.144909
BRN	0.0676944	0.0623315	0.0235754	0.0460617	0.0974533	0.0338706	0.191875
MNG	0.0694118	0.068517	0.0167772	0.0459087	0.0922629	0.0364641	0.118236
PRY	0.0684896	0.0665476	0.016013	0.0505521	0.0882676	0.0383684	0.117911
USA	0.0612539	0.0586756	0.0165679	0.0430598	0.0785492	0.0315286	0.141282
RWA	0.060124	0.0570435	0.0158981	0.0426371	0.0802149	0.0291623	0.123296
PRK	0.0838657	0.0824269	0.0181816	0.0600089	0.106529	0.0470491	0.141661
NGA	0.069582	0.0656158	0.0194582	0.0477175	0.0957829	0.0368104	0.139458
BWA	0.0570206	0.0551663	0.0138955	0.0395811	0.0762531	0.0343042	0.0935636
NOR	0.0954443	0.0905224	0.0215167	0.0743339	0.119492	0.056066	0.179608
BIH	0.0783718	0.0757586	0.0203682	0.0555425	0.106852	0.0404838	0.143049
BOL	0.0836556	0.0830936	0.0192422	0.0631716	0.110012	0.0413742	0.136496
AZE	0.0682607	0.0676417	0.0186997	0.0463422	0.0933152	0.0389566	0.150038
BLR	0.0991111	0.0965783	0.0246199	0.0708922	0.133414	0.0482418	0.170372
KOR	0.081927	0.0783551	0.0174381	0.0612528	0.104506	0.0490929	0.129325
RUS	0.0426888	0.0421428	0.00864298	0.0335498	0.0535994	0.0242387	0.0668178
PER	0.0637934	0.0622765	0.019385	0.0422484	0.092141	0.0349981	0.118886
VNM	0.0655592	0.0626888	0.016563	0.0471382	0.0854159	0.0315803	0.127696
PSE	0.0976005	0.0945017	0.0227617	0.0734382	0.126698	0.054913	0.160018
TUN	0.0744056	0.0754331	0.0182488	0.0505384	0.0975684	0.042412	0.120194
NLD	0.102468	0.100294	0.0262758	0.0708792	0.13755	0.0552098	0.17722
GTM	0.0691538	0.066903	0.0161568	0.0498509	0.0930843	0.0416673	0.112962
URY	0.0617969	0.0597357	0.014622	0.0450656	0.0804982	0.0332706	0.123374
HRV	0.0959552	0.0902854	0.0323607	0.0653693	0.126656	0.0513925	0.286977
IDN	0.066315	0.0654863	0.0153208	0.0490947	0.0848481	0.0343355	0.121086
LAO	0.0755438	0.0725759	0.0203033	0.0548275	0.0987281	0.033953	0.165583
GUY	0.0677962	0.0637689	0.0193122	0.0454314	0.0957279	0.0346021	0.135231
SLB	0.0699452	0.0672334	0.0181067	0.049187	0.0965433	0.0397824	0.109692
ISL	0.0914554	0.0867563	0.0210957	0.0679626	0.119125	0.0489691	0.167478
MOZ	0.0758517	0.0758368	0.018015	0.0538299	0.100571	0.0406728	0.125409
MLI	0.0693808	0.065965	0.0182481	0.0504648	0.0923851	0.0361485	0.138337
PHL	0.0601794	0.0585303	0.0155292	0.0426711	0.0804037	0.0340941	0.110008
CAN	0.0794275	0.0774243	0.0193566	0.0579247	0.103231	0.0390973	0.169746
CMR	0.0690219	0.0684103	0.0153161	0.0513931	0.0915462	0.0385541	0.113471
FJI	0.0721493	0.0697349	0.0194654	0.0516719	0.0989017	0.0381209	0.151459
CIV	0.0608389	0.0594345	0.0141236	0.0462151	0.0802125	0.0347928	0.110032
TUR	0.088183	0.0846987	0.0219577	0.0629381	0.11983	0.0471675	0.142129
LBR	0.0719536	0.0701285	0.0194113	0.0510427	0.0962083	0.0383027	0.150858
BEN	0.0644316	0.0633654	0.015949	0.0469376	0.0860794	0.0373297	0.122113

## Sheet: Stats_CuCl
	mean	median	std	p10	p90	min	max
ARG	0.119184	0.115204	0.0279874	0.0886208	0.154002	0.0512797	0.210102
CHE	0.0769769	0.0749467	0.016761	0.0595562	0.100937	0.0442622	0.138422
USA	0.0688413	0.0661514	0.0180391	0.0478764	0.0923469	0.0286664	0.118308
UKR	0.0989396	0.095121	0.028905	0.0677131	0.129523	0.0491785	0.229685
IND	0.0846175	0.0814086	0.0225013	0.0581188	0.118148	0.0444576	0.149723
ESP	0.107483	0.103356	0.0284099	0.0739164	0.146016	0.0555209	0.19125
ARE	0.0931047	0.08919	0.0246385	0.0674207	0.121558	0.053816	0.177087
KOR	0.103154	0.0973672	0.0284044	0.0727966	0.143647	0.0564027	0.19216
HUN	0.0834225	0.0796853	0.0207677	0.0589209	0.111632	0.0442244	0.146464
RUS	0.0847971	0.080478	0.029516	0.0548063	0.114843	0.0434123	0.220567
FRA	0.0730008	0.068652	0.0194469	0.0513018	0.102227	0.0376939	0.124858
ZAF	0.1228	0.12273	0.0374824	0.0785175	0.171297	0.0616897	0.268341
NLD	0.12393	0.115657	0.0364668	0.0783148	0.172837	0.0619376	0.241853
SVN	0.0969871	0.0930215	0.0290173	0.0684144	0.141046	0.05452	0.213702
CZE	0.100155	0.0944554	0.0307138	0.0650515	0.145308	0.0519122	0.206084
IRN	0.13043	0.123249	0.0398727	0.089057	0.18592	0.0543356	0.253268
MEX	0.109546	0.108962	0.0311009	0.0735451	0.149636	0.0462304	0.22215
JPN	0.155282	0.143496	0.048898	0.104502	0.236276	0.0759791	0.287505
BGR	0.0820112	0.0761785	0.0247638	0.0575517	0.117651	0.0413207	0.205817
SWE	0.059524	0.058005	0.0167148	0.0407747	0.0767143	0.0302636	0.133698
FIN	0.101179	0.10061	0.0272661	0.0666171	0.13552	0.0527279	0.177984
CAN	0.12076	0.118794	0.0334786	0.0831968	0.155149	0.0710896	0.292633
ROU	0.0851403	0.0810243	0.0225855	0.0612427	0.115671	0.0400811	0.165824
SVK	0.162291	0.160319	0.0476265	0.106446	0.21488	0.0802112	0.386558
GBR	0.115407	0.109553	0.0307261	0.0786261	0.160067	0.0692809	0.216187
PAK	0.0996826	0.0955963	0.0238642	0.0706881	0.130794	0.0496486	0.161638
BRA	0.102395	0.0964119	0.0314391	0.0649262	0.142505	0.0539112	0.221941
CHN	0.100204	0.0958533	0.0324623	0.0628053	0.143825	0.0470558	0.205412
ARM	0.0812508	0.0787389	0.0222943	0.0559508	0.107481	0.0392645	0.184018
BEL	0.116124	0.106718	0.0343033	0.0817371	0.164078	0.0596485	0.261253

## Sheet: Stats_HB
	mean	median	std	p10	p90	min	max
CHE	0.274421	0.242874	0.116726	0.166349	0.463135	0.13251	0.834527
SLV	0.225036	0.201908	0.0980734	0.135057	0.340886	0.0717389	0.686541
ARG	0.244339	0.228562	0.0854085	0.142059	0.357232	0.100916	0.564022
PAN	0.200438	0.181181	0.0802858	0.117127	0.294756	0.0850198	0.588292
UKR	0.277225	0.260649	0.0967465	0.169426	0.391413	0.124496	0.586041
GEO	0.207367	0.198009	0.0775415	0.12597	0.304193	0.0677462	0.497232
CUB	0.281523	0.260459	0.120601	0.166286	0.44688	0.121976	0.837773
ECU	0.274406	0.247141	0.0999523	0.167105	0.415148	0.0916861	0.535615
DEU	0.200212	0.182649	0.0819544	0.110796	0.319855	0.0701	0.446185
BFA	0.192019	0.172221	0.090051	0.113324	0.283426	0.0713793	0.75186
MDG	0.195566	0.183472	0.0763777	0.115131	0.288415	0.0633495	0.428479
KGZ	0.227566	0.21393	0.0798553	0.136181	0.342048	0.0878318	0.495376
IRQ	0.209977	0.193969	0.0822	0.13067	0.300088	0.0857795	0.567573
SOM	0.203768	0.199208	0.071301	0.119049	0.307846	0.0719706	0.430333
NAM	0.176231	0.16074	0.0714288	0.102537	0.269358	0.0686785	0.448043
ARE	0.176673	0.158291	0.0661671	0.106332	0.27056	0.0823505	0.380146
HUN	0.205527	0.187793	0.0772432	0.121941	0.324937	0.0770962	0.434596
SEN	0.173871	0.16583	0.0626274	0.103652	0.262947	0.0707782	0.34284
LBY	0.163023	0.160192	0.0563428	0.0979297	0.23361	0.0671202	0.376803
SDN	0.252636	0.247757	0.0844353	0.150328	0.34784	0.0987244	0.552947
MYS	0.207819	0.187152	0.089699	0.112664	0.327794	0.0844095	0.517275
SUR	0.223194	0.208381	0.0833693	0.145222	0.358679	0.0935141	0.52835
BLZ	0.218599	0.205725	0.0789151	0.134797	0.300146	0.0980711	0.488473
SVN	0.253977	0.239477	0.101784	0.154637	0.369361	0.110197	0.76537
CZE	0.201742	0.186693	0.0769314	0.113642	0.313009	0.0836848	0.471107
IRN	0.209543	0.187776	0.08986	0.124813	0.293482	0.0857838	0.643204
SLE	0.215273	0.198809	0.0756571	0.132435	0.33171	0.0804159	0.407522
JOR	0.168115	0.153291	0.0604527	0.0953896	0.258633	0.0589247	0.403483
LTU	0.197419	0.180534	0.0780826	0.111286	0.308457	0.0640311	0.506451
SWE	0.192681	0.173641	0.0783407	0.111972	0.288465	0.0822406	0.472897
POL	0.198461	0.186984	0.0675758	0.130386	0.28836	0.0784842	0.414998
TZA	0.19277	0.183103	0.065568	0.110268	0.28362	0.0704976	0.368886
VEN	0.314622	0.281383	0.137127	0.177171	0.487457	0.128474	0.940152
KEN	0.212854	0.201545	0.0829767	0.115183	0.333835	0.0719396	0.492437
SVK	0.229669	0.206775	0.0996906	0.131175	0.336976	0.0843228	0.671353
GBR	0.195471	0.182095	0.0708169	0.125046	0.289125	0.0676762	0.434064
MAR	0.172129	0.155754	0.0700125	0.0971362	0.266664	0.0724582	0.394744
AGO	0.207875	0.188245	0.0943138	0.111933	0.303696	0.0785313	0.632688
KWT	0.149766	0.144096	0.053708	0.0866818	0.210882	0.0505791	0.330365
UGA	0.206105	0.178977	0.0878033	0.112574	0.321573	0.0705578	0.483171
KHM	0.199162	0.192478	0.0706872	0.126234	0.297441	0.0765922	0.475614
COD	0.194564	0.183798	0.0750438	0.103915	0.298228	0.0814407	0.445703
QAT	0.155611	0.137364	0.07918	0.0886334	0.238248	0.0554286	0.709681
BGD	0.212594	0.197204	0.0865372	0.127702	0.306421	0.0677631	0.666553
GRC	0.240517	0.215325	0.108248	0.139644	0.404271	0.0952404	0.632144
IND	0.211451	0.188632	0.0857677	0.132052	0.317373	0.0829942	0.631162
MDA	0.242307	0.224137	0.0825254	0.149167	0.347241	0.12239	0.519178
GAB	0.230875	0.219175	0.084863	0.144941	0.329966	0.093478	0.687614
MWI	0.202088	0.194319	0.0643312	0.126742	0.285598	0.073395	0.422223
EGY	0.20363	0.198122	0.0623048	0.123289	0.284713	0.0795289	0.360714
MNE	0.272469	0.255456	0.105195	0.14158	0.431138	0.0988142	0.625532
ZAF	0.16675	0.156836	0.064904	0.0922198	0.260435	0.0763489	0.363685
MKD	0.260998	0.223584	0.118671	0.160517	0.424894	0.0960727	0.83669
BHS	0.192961	0.179839	0.0710535	0.120972	0.287852	0.080986	0.446874
ZWE	0.218407	0.196786	0.0867162	0.135472	0.31432	0.103111	0.573694
IRL	0.209754	0.187233	0.0866246	0.123934	0.327958	0.0745846	0.525071
LKA	0.246141	0.22675	0.105383	0.137696	0.404179	0.111129	0.601887
SRB	0.232649	0.220806	0.0843143	0.139357	0.343873	0.0920146	0.536622
COG	0.222771	0.206808	0.0872532	0.13226	0.337266	0.0828573	0.506437
NZL	0.177037	0.160836	0.0669504	0.109757	0.266644	0.0771867	0.378446
LVA	0.216766	0.20345	0.0909327	0.119437	0.34367	0.0812722	0.595971
AUS	0.188242	0.177184	0.0619481	0.123224	0.278304	0.0772849	0.472649
FLK	0.298825	0.279486	0.119775	0.178272	0.461338	0.101803	0.713654
ISR	0.188579	0.174599	0.0698569	0.118942	0.278363	0.0754366	0.45222
COL	0.192488	0.179043	0.0734637	0.112777	0.284817	0.0649211	0.453313
FIN	0.2848	0.26594	0.115069	0.155712	0.420314	0.109494	0.835555
GMB	0.178306	0.157356	0.0681177	0.101378	0.285518	0.061876	0.364442
PRT	0.196917	0.17974	0.0791796	0.120429	0.285849	0.0895128	0.496995
SAU	0.184864	0.167159	0.0731097	0.109074	0.303696	0.0621832	0.388572
PNG	0.205903	0.187769	0.079742	0.121183	0.311983	0.0780372	0.518354
JAM	0.209211	0.203154	0.0688973	0.136741	0.287682	0.079766	0.483874
PAK	0.22141	0.196995	0.0832544	0.13927	0.339568	0.0926437	0.587673
ZMB	0.206473	0.190949	0.0775539	0.127373	0.27595	0.0836244	0.503121
CHN	0.163151	0.157828	0.0562506	0.0972377	0.233215	0.0703427	0.339668
KAZ	0.20138	0.184573	0.0687266	0.125561	0.289767	0.0983275	0.398913
ARM	0.222578	0.212829	0.0889912	0.131743	0.305852	0.0733064	0.721502
LUX	0.221046	0.21549	0.0824504	0.126376	0.327788	0.0909757	0.455117
ALB	0.260797	0.228518	0.12577	0.145408	0.413107	0.110554	0.789994
HND	0.206221	0.197247	0.0692688	0.12786	0.295434	0.0915444	0.439605
NIC	0.211483	0.198367	0.0841269	0.119529	0.31729	0.0915045	0.567958
NER	0.174993	0.165455	0.0582162	0.104749	0.253338	0.0754524	0.322
ETH	0.245858	0.224319	0.102701	0.138429	0.396197	0.100938	0.586952
GRL	0.332109	0.307391	0.136305	0.188375	0.527745	0.121816	0.889282
OMN	0.189053	0.179392	0.0626826	0.120784	0.282385	0.0800186	0.400438
ESP	0.204809	0.190954	0.0868921	0.111936	0.324532	0.0952414	0.465723
TJK	0.222528	0.206294	0.0839097	0.122435	0.327589	0.0861257	0.438658
YEM	0.251167	0.23451	0.0939635	0.158858	0.351654	0.105827	0.653329
THA	0.191012	0.183698	0.0635016	0.111644	0.281122	0.0756279	0.373643
UZB	0.209632	0.193065	0.0878704	0.115492	0.324988	0.0702668	0.606597
DZA	0.167478	0.152265	0.0596861	0.105013	0.248625	0.0834199	0.410267
FRA	0.201206	0.18027	0.0818154	0.122985	0.303496	0.080798	0.539297
CRI	0.214414	0.206061	0.0832153	0.128594	0.301693	0.0783001	0.563869
AUT	0.186432	0.171938	0.0771941	0.105972	0.277711	0.0671678	0.508956
GHA	0.247618	0.224754	0.0917776	0.149297	0.366595	0.0925303	0.508306
MEX	0.189745	0.187605	0.0656539	0.103359	0.277722	0.0787457	0.365945
HTI	0.213783	0.193605	0.0764634	0.134478	0.310459	0.0746099	0.466706
JPN	0.337548	0.306005	0.17216	0.1658	0.535167	0.0925479	1.12899
NPL	0.207058	0.192272	0.072871	0.12418	0.306152	0.0739191	0.45671
BGR	0.220508	0.214928	0.071887	0.138775	0.313217	0.0942828	0.441493
DNK	0.178767	0.153529	0.0755763	0.112533	0.268224	0.0591037	0.472307
MMR	0.23681	0.228045	0.0770708	0.141447	0.344303	0.102451	0.466097
SWZ	0.190779	0.180824	0.0700772	0.122002	0.276572	0.07301	0.545553
CYP	0.26323	0.227485	0.126742	0.153011	0.432797	0.106635	0.813377
ROU	0.247228	0.226215	0.087563	0.158645	0.387418	0.0890013	0.471321
DOM	0.193812	0.182014	0.0757004	0.116433	0.295463	0.0805772	0.528988
BRA	0.183982	0.167896	0.0764698	0.110502	0.280148	0.0771591	0.544623
ITA	0.241886	0.21781	0.10139	0.143335	0.364568	0.105034	0.61474
SYR	0.23244	0.210712	0.0963181	0.135914	0.342662	0.0992877	0.646872
CHL	0.152332	0.150698	0.0531281	0.0892777	0.225987	0.0437866	0.32291
BEL	0.208026	0.196663	0.0747279	0.128192	0.308775	0.0783906	0.457825
EST	0.197193	0.183145	0.0663853	0.120359	0.30455	0.0871826	0.375449
LBN	0.287801	0.267332	0.109367	0.17296	0.446039	0.10162	0.652527
GIN	0.218338	0.206336	0.082253	0.126574	0.317142	0.089103	0.558716
BRN	0.20727	0.184735	0.0916722	0.11521	0.337424	0.0900664	0.50983
MNG	0.193375	0.175838	0.0783933	0.117138	0.272786	0.0875787	0.47368
PRY	0.179749	0.16076	0.073916	0.106072	0.269331	0.0689577	0.467292
USA	0.164075	0.155606	0.056809	0.0994868	0.240542	0.0641789	0.343321
RWA	0.187321	0.176828	0.0699051	0.105277	0.289038	0.0622403	0.395991
PRK	0.240185	0.232684	0.0994685	0.141331	0.348257	0.0809498	0.692814
NGA	0.196306	0.179341	0.0692989	0.122385	0.291944	0.0729523	0.466076
BWA	0.165687	0.15451	0.0767404	0.0917408	0.24589	0.0641794	0.636417
NOR	0.262355	0.25015	0.0913463	0.158823	0.374447	0.113435	0.565885
BIH	0.283594	0.277341	0.0959184	0.157238	0.428766	0.11756	0.496942
BOL	0.254121	0.237682	0.106303	0.14509	0.386858	0.0780118	0.701129
AZE	0.215457	0.200473	0.078202	0.122416	0.333471	0.096725	0.493695
BLR	0.309017	0.286055	0.116998	0.192262	0.44247	0.11415	0.807997
KOR	0.218211	0.20769	0.0824766	0.134574	0.313995	0.0800449	0.653604
RUS	0.243799	0.203166	0.113801	0.135793	0.381921	0.0978445	0.628301
PER	0.189601	0.180349	0.0663844	0.115231	0.265281	0.0787423	0.396147
VNM	0.205556	0.195771	0.0758002	0.123387	0.29029	0.0679707	0.447003
PSE	0.263624	0.252691	0.0949986	0.164089	0.370169	0.0998317	0.684176
TUN	0.216593	0.197761	0.0852146	0.131007	0.318138	0.0932475	0.542981
NLD	0.193676	0.167203	0.0817397	0.121912	0.281334	0.0776459	0.501337
GTM	0.207326	0.182667	0.0843788	0.122631	0.314144	0.0796015	0.465058
URY	0.159966	0.14451	0.0624769	0.0967755	0.239264	0.0602673	0.479996
HRV	0.240095	0.220903	0.0944972	0.145253	0.355604	0.10244	0.621312
IDN	0.215415	0.199344	0.0784739	0.131923	0.3128	0.103758	0.470933
LAO	0.239544	0.218817	0.0945674	0.146366	0.34526	0.0875101	0.580452
GUY	0.196812	0.184225	0.0696533	0.117963	0.277568	0.0666897	0.443084
SLB	0.226212	0.19895	0.0952146	0.123116	0.353486	0.0875466	0.515477
ISL	0.347027	0.320714	0.142974	0.200896	0.530079	0.140485	0.846041
MOZ	0.229591	0.204266	0.0894273	0.133527	0.348627	0.0729804	0.520595
MLI	0.187456	0.178343	0.0725764	0.113676	0.266838	0.0832389	0.553462
PHL	0.184735	0.171169	0.068844	0.113548	0.270466	0.0559527	0.44849
CAN	0.18836	0.178341	0.0685797	0.110009	0.283004	0.0756315	0.387747
CMR	0.212038	0.194719	0.0839208	0.123545	0.316637	0.0927387	0.480324
FJI	0.202581	0.194111	0.0802847	0.115188	0.290397	0.0775644	0.603556
CIV	0.196046	0.18183	0.0699254	0.124611	0.273859	0.0610131	0.506097
TUR	0.28432	0.259137	0.103034	0.184396	0.423991	0.114412	0.687331
LBR	0.229404	0.215734	0.0935376	0.12791	0.336074	0.081297	0.744254
BEN	0.184846	0.172452	0.0698723	0.109199	0.272145	0.0801603	0.523993

## Sheet: Stats_HTL
	mean	median	std	p10	p90	min	max
CHE	0.216588	0.213099	0.036641	0.175125	0.254186	0.141766	0.35201
SLV	0.156425	0.151181	0.0302316	0.122838	0.198484	0.102838	0.259186
ARG	0.171959	0.172811	0.0399265	0.120922	0.222574	0.0880462	0.278308
PAN	0.131679	0.128504	0.0218671	0.10898	0.160584	0.0925303	0.198464
UKR	0.201615	0.195454	0.0443111	0.15066	0.261864	0.130618	0.337665
GEO	0.109518	0.106906	0.019904	0.0850497	0.135661	0.0751449	0.160065
CUB	0.191996	0.185982	0.0381994	0.149861	0.241857	0.129269	0.350179
ECU	0.175616	0.176142	0.0364589	0.13206	0.221093	0.10478	0.289287
DEU	0.189335	0.187589	0.0328865	0.152585	0.2274	0.127517	0.322444
BFA	0.131261	0.125233	0.0280388	0.0967989	0.163601	0.0704242	0.240683
MDG	0.113997	0.111131	0.0235159	0.0879561	0.149231	0.0653426	0.174798
KGZ	0.130866	0.12835	0.026847	0.0972208	0.164374	0.0855443	0.208092
IRQ	0.156482	0.14966	0.0307698	0.122424	0.192872	0.101664	0.263993
SOM	0.165496	0.161072	0.0377546	0.123694	0.211297	0.102233	0.345621
NAM	0.128649	0.129926	0.0243408	0.10003	0.163526	0.0866	0.190661
ARE	0.127809	0.124269	0.020355	0.105527	0.156112	0.0850833	0.199963
HUN	0.143077	0.141708	0.0237086	0.116467	0.168359	0.0966786	0.209848
SEN	0.105499	0.100124	0.0237295	0.0821124	0.136445	0.0675108	0.19726
LBY	0.105773	0.10232	0.0202093	0.0847912	0.132516	0.0692746	0.182369
SDN	0.195017	0.191882	0.0484971	0.135458	0.257397	0.103921	0.325764
MYS	0.115005	0.111888	0.0209125	0.0930049	0.14096	0.0805531	0.199491
SUR	0.133816	0.130217	0.0281998	0.100518	0.169644	0.0810285	0.220941
BLZ	0.170904	0.164378	0.0363538	0.13033	0.216896	0.104247	0.306996
SVN	0.175486	0.172546	0.0306593	0.143376	0.211869	0.112956	0.273195
CZE	0.128426	0.124211	0.0225188	0.103057	0.155338	0.0793832	0.210067
IRN	0.14249	0.138329	0.0293911	0.108302	0.180109	0.0892056	0.277446
SLE	0.142526	0.139204	0.0335851	0.107842	0.186738	0.0807706	0.258456
JOR	0.135385	0.132234	0.0233502	0.109665	0.163146	0.0941977	0.213895
LTU	0.146725	0.144487	0.0256913	0.117703	0.180183	0.101477	0.234186
SWE	0.119295	0.117372	0.0193197	0.0965466	0.144032	0.0839943	0.194001
POL	0.157411	0.15196	0.0288306	0.124682	0.185935	0.111813	0.25856
TZA	0.116947	0.113952	0.0240718	0.0905523	0.148562	0.0673047	0.194886
VEN	0.226783	0.2228	0.0509552	0.166962	0.292468	0.12665	0.3714
KEN	0.149421	0.145429	0.027257	0.116974	0.190105	0.104009	0.214806
SVK	0.145591	0.141016	0.0250075	0.116367	0.179253	0.101536	0.232996
GBR	0.187253	0.18466	0.0312852	0.152236	0.224195	0.12824	0.299982
MAR	0.117132	0.115223	0.0237608	0.0929827	0.145257	0.0722301	0.22083
AGO	0.126204	0.124214	0.0268362	0.0939695	0.160803	0.0740361	0.21046
KWT	0.103537	0.103581	0.016163	0.0841806	0.126794	0.0695112	0.15164
UGA	0.115284	0.11399	0.0243363	0.085917	0.146593	0.0681919	0.193127
KHM	0.12402	0.121534	0.0265816	0.0903708	0.157046	0.077445	0.210517
COD	0.1366	0.136944	0.0269756	0.103492	0.17389	0.0776956	0.210601
QAT	0.101225	0.0993249	0.0163295	0.0808142	0.120256	0.0709662	0.151293
BGD	0.137151	0.132507	0.0235113	0.111529	0.169102	0.0851058	0.2045
GRC	0.166511	0.16547	0.0257759	0.13524	0.198156	0.109631	0.267304
IND	0.104078	0.10145	0.0201274	0.0809762	0.131404	0.0686647	0.169841
MDA	0.162848	0.162298	0.0301072	0.122795	0.200956	0.110827	0.237725
GAB	0.159176	0.149411	0.0365397	0.120373	0.209288	0.0926687	0.28883
MWI	0.142175	0.141102	0.0341994	0.104092	0.177324	0.0911349	0.263051
EGY	0.149949	0.144852	0.0355786	0.109183	0.195099	0.0845245	0.297291
MNE	0.166155	0.16252	0.0302484	0.132138	0.210714	0.102981	0.25833
ZAF	0.113417	0.110104	0.0198452	0.0916923	0.140336	0.075712	0.184344
MKD	0.148391	0.145774	0.0268879	0.119811	0.180885	0.095172	0.252861
BHS	0.147415	0.144843	0.026345	0.114975	0.188191	0.097824	0.22276
ZWE	0.147739	0.145291	0.035285	0.105018	0.188232	0.0873786	0.303724
IRL	0.176332	0.172087	0.0279072	0.143837	0.210593	0.124524	0.274912
LKA	0.170352	0.167999	0.0319055	0.130672	0.207566	0.0998815	0.251899
SRB	0.152378	0.14673	0.0285046	0.115538	0.193529	0.103227	0.217169
COG	0.153934	0.153442	0.0293761	0.115391	0.196286	0.0901413	0.231935
NZL	0.16746	0.161487	0.0299305	0.135679	0.21013	0.110458	0.281028
LVA	0.14261	0.140354	0.0251714	0.112442	0.174381	0.0991997	0.229137
AUS	0.171197	0.17068	0.0324775	0.133236	0.211796	0.109996	0.281721
FLK	0.151611	0.147192	0.0275573	0.117792	0.19304	0.105887	0.224968
ISR	0.146051	0.142807	0.02679	0.112904	0.182081	0.0811602	0.224676
COL	0.11129	0.108239	0.0210172	0.0856604	0.134058	0.0687887	0.186255
FIN	0.167214	0.164665	0.0269197	0.134927	0.200417	0.116064	0.254273
GMB	0.103658	0.102238	0.0206249	0.0787135	0.12924	0.0645601	0.186118
PRT	0.154437	0.150169	0.026511	0.128275	0.185782	0.0998672	0.25583
SAU	0.161681	0.159085	0.0278733	0.12629	0.194172	0.110703	0.242426
PNG	0.13071	0.126635	0.02337	0.105171	0.163265	0.0798723	0.198685
JAM	0.137269	0.132266	0.0248034	0.109076	0.171305	0.0840263	0.240509
PAK	0.164104	0.159401	0.0332943	0.128793	0.20473	0.108564	0.294916
ZMB	0.141894	0.139455	0.0365499	0.0998038	0.186519	0.0677762	0.332178
CHN	0.0974079	0.0949811	0.0185677	0.0764999	0.119829	0.0573885	0.179985
KAZ	0.116637	0.113225	0.0202492	0.0937396	0.142532	0.0771032	0.170717
ARM	0.127916	0.124844	0.0226067	0.102538	0.162657	0.0846735	0.192495
LUX	0.189914	0.187791	0.034252	0.152146	0.230831	0.126194	0.316396
ALB	0.142411	0.139329	0.0275502	0.109654	0.177611	0.0890897	0.228784
HND	0.148854	0.147501	0.0257818	0.118042	0.182482	0.10251	0.246688
NIC	0.126201	0.123114	0.0263656	0.0982796	0.165963	0.0727956	0.239888
NER	0.147398	0.141512	0.0332539	0.11034	0.195884	0.0935859	0.245963
ETH	0.168701	0.163303	0.0358434	0.125697	0.209828	0.0995241	0.322604
GRL	0.136689	0.132281	0.0259368	0.105922	0.170534	0.0926002	0.242247
OMN	0.158866	0.15574	0.0287642	0.124539	0.191235	0.104432	0.293759
ESP	0.176289	0.169279	0.0310686	0.141561	0.218999	0.111691	0.291197
TJK	0.134239	0.129846	0.0263169	0.105267	0.161681	0.0901398	0.270396
YEM	0.195448	0.18851	0.0402046	0.15032	0.241199	0.127515	0.348301
THA	0.111931	0.107348	0.0214421	0.0846978	0.143905	0.0728083	0.169802
UZB	0.123175	0.122171	0.0214254	0.0988697	0.146125	0.0844238	0.195971
DZA	0.111513	0.110956	0.0190446	0.0897101	0.141883	0.0780382	0.166156
FRA	0.184087	0.182151	0.0292448	0.148891	0.220639	0.129511	0.271508
CRI	0.14469	0.143031	0.0269296	0.115355	0.180799	0.0971105	0.258367
AUT	0.12684	0.124903	0.0190348	0.10368	0.152879	0.0894425	0.19199
GHA	0.144132	0.139283	0.0367964	0.106207	0.193995	0.0770133	0.287035
MEX	0.105057	0.100678	0.0199057	0.0855397	0.130261	0.0630538	0.188001
HTI	0.167771	0.160619	0.0400367	0.126288	0.230295	0.0958983	0.274517
JPN	0.18971	0.184433	0.032459	0.158506	0.2267	0.122109	0.29692
NPL	0.126877	0.122162	0.0244199	0.100456	0.162444	0.0810582	0.217061
BGR	0.146131	0.142038	0.025637	0.114392	0.180778	0.0961212	0.228104
DNK	0.176097	0.17543	0.0302822	0.137099	0.210704	0.113112	0.27634
MMR	0.162357	0.160756	0.0321565	0.121597	0.203262	0.095052	0.270646
SWZ	0.113867	0.110068	0.0229737	0.0877128	0.148804	0.0664434	0.178709
CYP	0.16334	0.162518	0.0260279	0.130874	0.197852	0.110689	0.257961
ROU	0.170176	0.164717	0.0295216	0.139467	0.208571	0.110195	0.271911
DOM	0.136421	0.136555	0.021778	0.108495	0.164408	0.0873031	0.199178
BRA	0.111206	0.108863	0.021721	0.0867601	0.138555	0.0656458	0.173693
ITA	0.147017	0.143601	0.0220462	0.121473	0.181607	0.105541	0.211402
SYR	0.201423	0.196822	0.0441139	0.146947	0.261942	0.107882	0.343377
CHL	0.108007	0.106191	0.0199138	0.0851655	0.133673	0.0750106	0.181331
BEL	0.183924	0.183418	0.032657	0.146271	0.218771	0.111115	0.296926
EST	0.137362	0.133883	0.024314	0.109674	0.165531	0.088125	0.239758
LBN	0.216416	0.211861	0.0478666	0.155211	0.278419	0.126918	0.390957
GIN	0.138774	0.134196	0.0300625	0.102575	0.183865	0.0829922	0.241685
BRN	0.122494	0.120746	0.0205879	0.0992453	0.14681	0.0872949	0.203692
MNG	0.13875	0.134391	0.0270759	0.111743	0.176349	0.0850022	0.254911
PRY	0.122118	0.118594	0.0224529	0.0963328	0.150989	0.0822201	0.196247
USA	0.130864	0.129273	0.0211666	0.106054	0.157095	0.0916216	0.199933
RWA	0.115763	0.111482	0.0248092	0.0861881	0.150928	0.0745484	0.186206
PRK	0.194151	0.189339	0.0395188	0.148699	0.238449	0.100645	0.325791
NGA	0.13429	0.131013	0.0259168	0.10487	0.16896	0.0780386	0.205405
BWA	0.0966824	0.0955679	0.016692	0.0754223	0.119451	0.0666985	0.143395
NOR	0.205391	0.205239	0.0371381	0.154296	0.252714	0.126904	0.348461
BIH	0.16363	0.160643	0.0313099	0.12748	0.207065	0.111463	0.272997
BOL	0.179764	0.17211	0.042658	0.135168	0.231621	0.0874573	0.318165
AZE	0.132458	0.129021	0.0215365	0.110746	0.16153	0.0742927	0.212756
BLR	0.237186	0.233177	0.0544816	0.175723	0.309087	0.143397	0.379224
KOR	0.160719	0.15719	0.0277705	0.127868	0.193254	0.100981	0.251716
RUS	0.128141	0.123085	0.0245752	0.102821	0.154883	0.0905408	0.256085
PER	0.103598	0.100901	0.0188162	0.08108	0.127084	0.0667384	0.185139
VNM	0.123011	0.120969	0.02293	0.0966563	0.1476	0.0785142	0.211871
PSE	0.228834	0.221556	0.0475651	0.177054	0.290622	0.132093	0.371433
TUN	0.150647	0.148024	0.0346735	0.111089	0.187335	0.0910369	0.285419
NLD	0.177166	0.171387	0.0300724	0.142686	0.219357	0.133102	0.283132
GTM	0.13639	0.133032	0.0242794	0.109235	0.167869	0.0910356	0.203646
URY	0.106927	0.107187	0.0195262	0.0840712	0.13346	0.0760796	0.169395
HRV	0.152834	0.147578	0.0234156	0.130302	0.18038	0.107863	0.233035
IDN	0.128871	0.124799	0.0222233	0.104051	0.161138	0.0931031	0.198033
LAO	0.156728	0.148573	0.0363883	0.118045	0.197444	0.0968586	0.271734
GUY	0.111564	0.11036	0.0193781	0.0871706	0.137882	0.0754348	0.168442
SLB	0.143954	0.139652	0.0291679	0.108318	0.179943	0.0963945	0.269312
ISL	0.190596	0.190042	0.0311812	0.150207	0.232045	0.128521	0.28149
MOZ	0.147039	0.140751	0.0315894	0.111495	0.184366	0.0780427	0.26056
MLI	0.13729	0.134233	0.031741	0.10066	0.175941	0.0708656	0.232682
PHL	0.112256	0.111393	0.0211792	0.0862044	0.139801	0.0634752	0.179406
CAN	0.167513	0.165351	0.0262686	0.137009	0.195912	0.121162	0.2726
CMR	0.131847	0.127615	0.0262952	0.105957	0.173116	0.0719935	0.209151
FJI	0.150091	0.146484	0.0271053	0.118063	0.184446	0.104391	0.22995
CIV	0.107501	0.10609	0.0200599	0.0837051	0.134715	0.0727863	0.174458
TUR	0.182177	0.179796	0.0324935	0.145735	0.223769	0.11289	0.285967
LBR	0.140521	0.1362	0.033058	0.103586	0.182985	0.0790869	0.244948
BEN	0.113788	0.114088	0.0223264	0.0861122	0.141155	0.071747	0.181498

[truncated: 19 more sheets: Stats_HTSE, Stats_HVO_diesel, Stats_HVO_kerosene, Stats_M_PYR, Stats_PTM, Stats_RWGS_FT_diesel, Stats_RWGS_FT_kerosene, Stats_RWGS_MeOH_methanol, Stats_RWGS_MeOH_DME, Stats_RWGS_MeOH_kerosene, Stats_SMR_CCS, Stats_SOEC, Stats_SR_FT_diesel, Stats_SR_FT_kerosene, Stats_ST_FT_diesel, Stats_ST_FT_kerosene, Stats_TG_CCS, Stats_TG_FT_diesel, Stats_TG_FT_kerosene]
