# Supplementary material for: Global cost drivers and regional trade-offs for low-carbon fuels: a prospective techno-economic assessment
Source: Royal Society of Chemistry journal article supplement (doi:10.1039/d5ee05591a), 2026-01-01
Supplement: d5ee05591a2.zip [file Switzerland_Transport_Pathways.xlsx]

## Sheet: Sheet1
origin_country	carrier	transport_mode	distance	route_type	year	scenario	conversion_cost	transport_cost	storage_cost	total_cost	capital_to_port_distance	capital_to_port_mode	capital_to_port_cost	sea_distance	sea_cost	port_to_capital_distance	port_to_capital_mode	port_to_capital_cost
ABW	LH2	ship	8265.99	maritime	2024	base_without_pipeline	3.268	1.07479	1.25726	5.60005	0	none	0	7685.42	0.755477	580.565	barge	0.319311
ABW	NH3	ship	8265.99	maritime	2024	base_without_pipeline	2.916	0.395376	0.0452308	3.35661	0	none	0	7685.42	0.272064	580.565	barge	0.123312
ABW	MeOH	ship	8265.99	maritime	2024	base_without_pipeline	3.46714	0.437463	0.012266	3.91687	0	none	0	7685.42	0.307417	580.565	barge	0.130047
ABW	LOHC	ship	8265.99	maritime	2024	base_without_pipeline	3.54853	0.328098	0.0275985	3.90423	0	none	0	7685.42	0.230563	580.565	barge	0.0975349
AFG	CH2	truck	6450.25	land	2024	base_without_pipeline	0.263158	19.3508	2.11508	21.729
AFG	LH2	truck	6450.25	land	2024	base_without_pipeline	3.268	3.87015	0.963534	8.10168
AFG	LH2	rail	6450.25	land	2024	base_without_pipeline	3.268	3.22512	0.816612	7.30974
AFG	NH3	truck	6450.25	land	2024	base_without_pipeline	2.916	6.4696	0.0346637	9.42026
AFG	NH3	rail	6450.25	land	2024	base_without_pipeline	2.916	0.799186	0.0293781	3.74456
AFG	MeOH	truck	6450.25	land	2024	base_without_pipeline	3.46714	6.70826	0.00940033	10.1848
AFG	MeOH	rail	6450.25	land	2024	base_without_pipeline	3.46714	0.825632	0.00796694	4.30074
AFG	LOHC	truck	6450.25	land	2024	base_without_pipeline	3.54853	5.03119	0.0211507	8.60088
AFG	LOHC	rail	6450.25	land	2024	base_without_pipeline	3.54853	0.619224	0.0179256	4.18568
AFG	LH2	ship	9777.26	maritime	2024	base_without_pipeline	3.268	1.81437	1.41217	6.49454	1471.3	rail	0.73565	7725.39	0.759406	580.565	barge	0.319311
AFG	NH3	ship	9777.26	maritime	2024	base_without_pipeline	2.916	0.579085	0.0508036	3.54589	1471.3	rail	0.182294	7725.39	0.273479	580.565	barge	0.123312
AFG	MeOH	ship	9777.26	maritime	2024	base_without_pipeline	3.46714	0.627389	0.0137773	4.10831	1471.3	rail	0.188326	7725.39	0.309016	580.565	barge	0.130047
AFG	LOHC	ship	9777.26	maritime	2024	base_without_pipeline	3.54853	0.470541	0.0309988	4.05007	1471.3	rail	0.141245	7725.39	0.231762	580.565	barge	0.0975349
AGO	LH2	ship	10487.3	maritime	2024	base_without_pipeline	3.268	1.76883	1.48495	6.52178	1184.17	rail	0.592085	8722.58	0.85743	580.565	barge	0.319311
AGO	NH3	ship	10487.3	maritime	2024	base_without_pipeline	2.916	0.57881	0.053422	3.54823	1184.17	rail	0.146719	8722.58	0.308779	580.565	barge	0.123312
AGO	MeOH	ship	10487.3	maritime	2024	base_without_pipeline	3.46714	0.630524	0.0144873	4.11215	1184.17	rail	0.151574	8722.58	0.348903	580.565	barge	0.130047
AGO	LOHC	ship	10487.3	maritime	2024	base_without_pipeline	3.54853	0.472893	0.0325965	4.05402	1184.17	rail	0.11368	8722.58	0.261677	580.565	barge	0.0975349
AIA	LH2	ship	7365.65	maritime	2024	base_without_pipeline	3.268	0.986284	1.16498	5.41926	0	none	0	6785.08	0.666973	580.565	barge	0.319311
AIA	NH3	ship	7365.65	maritime	2024	base_without_pipeline	2.916	0.363504	0.0419108	3.32141	0	none	0	6785.08	0.240192	580.565	barge	0.123312
AIA	MeOH	ship	7365.65	maritime	2024	base_without_pipeline	3.46714	0.40145	0.0113656	3.87996	0	none	0	6785.08	0.271403	580.565	barge	0.130047
AIA	LOHC	ship	7365.65	maritime	2024	base_without_pipeline	3.54853	0.301087	0.0255727	3.87519	0	none	0	6785.08	0.203552	580.565	barge	0.0975349
ALB	CH2	truck	1800	land	2024	base_without_pipeline	0.263158	5.4	0.72	6.38316
ALB	LH2	truck	1800	land	2024	base_without_pipeline	3.268	1.08	0.328	4.676
ALB	LH2	rail	1800	land	2024	base_without_pipeline	3.268	0.9	0.287	4.455
ALB	NH3	truck	1800	land	2024	base_without_pipeline	2.916	1.8054	0.0118	4.7332
ALB	NH3	rail	1800	land	2024	base_without_pipeline	2.916	0.22302	0.010325	3.14934
ALB	MeOH	truck	1800	land	2024	base_without_pipeline	3.46714	1.872	0.0032	5.34234
ALB	MeOH	rail	1800	land	2024	base_without_pipeline	3.46714	0.2304	0.0028	3.70034
ALB	LOHC	truck	1800	land	2024	base_without_pipeline	3.54853	1.404	0.0072	4.95973
ALB	LOHC	rail	1800	land	2024	base_without_pipeline	3.54853	0.1728	0.0063	3.72763
ALB	LH2	ship	2226.95	maritime	2024	base_without_pipeline	3.268	0.605548	0.638262	4.51181	247.952	truck	0.148771	1398.43	0.137466	580.565	barge	0.319311
ALB	NH3	ship	2226.95	maritime	2024	base_without_pipeline	2.916	0.421512	0.0229619	3.36047	247.952	truck	0.248696	1398.43	0.0495044	580.565	barge	0.123312
ALB	MeOH	ship	2226.95	maritime	2024	base_without_pipeline	3.46714	0.443854	0.00622695	3.91722	247.952	truck	0.25787	1398.43	0.0559372	580.565	barge	0.130047
ALB	LOHC	ship	2226.95	maritime	2024	base_without_pipeline	3.54853	0.33289	0.0140106	3.89543	247.952	truck	0.193403	1398.43	0.0419529	580.565	barge	0.0975349
AND	CH2	truck	890.343	land	2024	base_without_pipeline	0.263158	2.67103	0.447103	3.38129
AND	LH2	truck	890.343	land	2024	base_without_pipeline	3.268	0.534206	0.20368	4.00589
AND	LH2	rail	890.343	land	2024	base_without_pipeline	3.268	0.445171	0.1834	3.89657
AND	NH3	truck	890.343	land	2024	base_without_pipeline	2.916	0.893014	0.00732752	3.81634
AND	NH3	rail	890.343	land	2024	base_without_pipeline	2.916	0.110313	0.00659793	3.03291
AND	MeOH	truck	890.343	land	2024	base_without_pipeline	3.46714	0.925957	0.00198712	4.39509
AND	MeOH	rail	890.343	land	2024	base_without_pipeline	3.46714	0.113964	0.00178927	3.5829
AND	LOHC	truck	890.343	land	2024	base_without_pipeline	3.54853	0.694468	0.00447103	4.24747
AND	LOHC	rail	890.343	land	2024	base_without_pipeline	3.54853	0.0854729	0.00402586	3.63803
ANT	LH2	ship	7357.36	maritime	2024	base_without_pipeline	3.268	0.98547	1.16413	5.4176	0	none	0	6776.8	0.666159	580.565	barge	0.319311
ANT	NH3	ship	7357.36	maritime	2024	base_without_pipeline	2.916	0.363211	0.0418803	3.32109	0	none	0	6776.8	0.239899	580.565	barge	0.123312
ANT	MeOH	ship	7357.36	maritime	2024	base_without_pipeline	3.46714	0.401119	0.0113574	3.87962	0	none	0	6776.8	0.271072	580.565	barge	0.130047
ANT	LOHC	ship	7357.36	maritime	2024	base_without_pipeline	3.54853	0.300839	0.0255541	3.87492	0	none	0	6776.8	0.203304	580.565	barge	0.0975349
ARE	LH2	ship	8393.99	maritime	2024	base_without_pipeline	3.268	1.20249	1.27038	5.74088	229.463	truck	0.137678	7583.96	0.745503	580.565	barge	0.319311
ARE	NH3	ship	8393.99	maritime	2024	base_without_pipeline	2.916	0.621936	0.0457028	3.58364	229.463	truck	0.230151	7583.96	0.268472	580.565	barge	0.123312
ARE	MeOH	ship	8393.99	maritime	2024	base_without_pipeline	3.46714	0.672046	0.012394	4.15158	229.463	truck	0.238642	7583.96	0.303358	580.565	barge	0.130047
ARE	LOHC	ship	8393.99	maritime	2024	base_without_pipeline	3.54853	0.504035	0.0278865	4.08045	229.463	truck	0.178981	7583.96	0.227519	580.565	barge	0.0975349
ARG	LH2	ship	15515.5	maritime	2024	base_without_pipeline	3.268	2.48566	2.00034	7.75399	1738.22	rail	0.86911	13196.7	1.29724	580.565	barge	0.319311
ARG	NH3	ship	15515.5	maritime	2024	base_without_pipeline	2.916	0.805841	0.0719634	3.7938	1738.22	rail	0.215365	13196.7	0.467163	580.565	barge	0.123312
ARG	MeOH	ship	15515.5	maritime	2024	base_without_pipeline	3.46714	0.880407	0.0195155	4.36707	1738.22	rail	0.222492	13196.7	0.527868	580.565	barge	0.130047
ARG	LOHC	ship	15515.5	maritime	2024	base_without_pipeline	3.54853	0.660305	0.0439098	4.25274	1738.22	rail	0.166869	13196.7	0.395901	580.565	barge	0.0975349
ARM	CH2	truck	3923.06	land	2024	base_without_pipeline	0.263158	11.7692	1.35692	13.3893
ARM	LH2	truck	3923.06	land	2024	base_without_pipeline	3.268	2.35384	0.618152	6.23999
ARM	LH2	rail	3923.06	land	2024	base_without_pipeline	3.268	1.96153	0.528793	5.75832
ARM	NH3	truck	3923.06	land	2024	base_without_pipeline	2.916	3.93483	0.0222384	6.87307
ARM	NH3	rail	3923.06	land	2024	base_without_pipeline	2.916	0.486067	0.0190236	3.42109
ARM	MeOH	truck	3923.06	land	2024	base_without_pipeline	3.46714	4.07998	0.00603075	7.55316
ARM	MeOH	rail	3923.06	land	2024	base_without_pipeline	3.46714	0.502152	0.00515896	3.97445
ARM	LOHC	truck	3923.06	land	2024	base_without_pipeline	3.54853	3.05999	0.0135692	6.62209
ARM	LOHC	rail	3923.06	land	2024	base_without_pipeline	3.54853	0.376614	0.0116077	3.93675
ARM	LH2	ship	4928.24	maritime	2024	base_without_pipeline	3.268	1.15727	0.915144	5.34041	818.374	truck	0.491024	3529.3	0.34693	580.565	barge	0.319311
ARM	NH3	ship	4928.24	maritime	2024	base_without_pipeline	2.916	1.06908	0.0329229	4.018	818.374	truck	0.820829	3529.3	0.124937	580.565	barge	0.123312
ARM	MeOH	ship	4928.24	maritime	2024	base_without_pipeline	3.46714	1.12233	0.00892824	4.5984	818.374	truck	0.851109	3529.3	0.141172	580.565	barge	0.130047
ARM	LOHC	ship	4928.24	maritime	2024	base_without_pipeline	3.54853	0.841746	0.0200885	4.41036	818.374	truck	0.638332	3529.3	0.105879	580.565	barge	0.0975349
ASM	LH2	ship	19652.6	maritime	2024	base_without_pipeline	3.268	2.19409	2.42439	7.88648	0	none	0	19072	1.87478	580.565	barge	0.319311
ASM	NH3	ship	19652.6	maritime	2024	base_without_pipeline	2.916	0.798461	0.0872188	3.80168	0	none	0	19072	0.675149	580.565	barge	0.123312
ASM	MeOH	ship	19652.6	maritime	2024	base_without_pipeline	3.46714	0.892927	0.0236526	4.38372	0	none	0	19072	0.76288	580.565	barge	0.130047
ASM	LOHC	ship	19652.6	maritime	2024	base_without_pipeline	3.54853	0.669695	0.0532183	4.27144	0	none	0	19072	0.57216	580.565	barge	0.0975349
ATG	LH2	ship	7268.51	maritime	2024	base_without_pipeline	3.268	0.976736	1.15502	5.39976	0	none	0	6687.95	0.657425	580.565	barge	0.319311
ATG	NH3	ship	7268.51	maritime	2024	base_without_pipeline	2.916	0.360065	0.0415526	3.31762	0	none	0	6687.95	0.236753	580.565	barge	0.123312
ATG	MeOH	ship	7268.51	maritime	2024	base_without_pipeline	3.46714	0.397565	0.0112685	3.87598	0	none	0	6687.95	0.267518	580.565	barge	0.130047
ATG	LOHC	ship	7268.51	maritime	2024	base_without_pipeline	3.54853	0.298173	0.0253542	3.87206	0	none	0	6687.95	0.200638	580.565	barge	0.0975349
AUS	LH2	ship	18073.8	maritime	2024	base_without_pipeline	3.268	2.35881	2.26257	7.88937	637.649	truck	0.382589	16855.6	1.65691	580.565	barge	0.319311
AUS	NH3	ship	18073.8	maritime	2024	base_without_pipeline	2.916	1.35956	0.0813972	4.35696	637.649	truck	0.639562	16855.6	0.596688	580.565	barge	0.123312
AUS	MeOH	ship	18073.8	maritime	2024	base_without_pipeline	3.46714	1.46743	0.0220738	4.95664	637.649	truck	0.663155	16855.6	0.674224	580.565	barge	0.130047
AUS	LOHC	ship	18073.8	maritime	2024	base_without_pipeline	3.54853	1.10057	0.0496661	4.69876	637.649	truck	0.497366	16855.6	0.505668	580.565	barge	0.0975349
AUT	CH2	truck	825	land	2024	base_without_pipeline	0.263158	2.475	0.4275	3.16566
AUT	LH2	truck	825	land	2024	base_without_pipeline	3.268	0.495	0.19475	3.95775
AUT	LH2	rail	825	land	2024	base_without_pipeline	3.268	0.4125	0.175958	3.85646
AUT	LH2	barge	825	land	2024	base_without_pipeline	3.268	0.45375	0.386937	4.10869
AUT	NH3	truck	825	land	2024	base_without_pipeline	2.916	0.827475	0.00700625	3.75048
AUT	NH3	rail	825	land	2024	base_without_pipeline	2.916	0.102218	0.00633021	3.02455
AUT	NH3	barge	825	land	2024	base_without_pipeline	2.916	0.17523	0.0139203	3.10515
AUT	MeOH	truck	825	land	2024	base_without_pipeline	3.46714	0.858	0.0019	4.32704
AUT	MeOH	rail	825	land	2024	base_without_pipeline	3.46714	0.1056	0.00171667	3.57446
AUT	MeOH	barge	825	land	2024	base_without_pipeline	3.46714	0.1848	0.003775	3.65572
AUT	LOHC	truck	825	land	2024	base_without_pipeline	3.54853	0.6435	0.004275	4.1963
AUT	LOHC	rail	825	land	2024	base_without_pipeline	3.54853	0.0792	0.0038625	3.63159
AUT	LOHC	barge	825	land	2024	base_without_pipeline	3.54853	0.1386	0.00849375	3.69562
AZE	CH2	truck	4195.68	land	2024	base_without_pipeline	0.263158	12.587	1.4387	14.2889
AZE	LH2	truck	4195.68	land	2024	base_without_pipeline	3.268	2.51741	0.65541	6.44082
AZE	LH2	rail	4195.68	land	2024	base_without_pipeline	3.268	2.09784	0.559841	5.92568
AZE	NH3	truck	4195.68	land	2024	base_without_pipeline	2.916	4.20827	0.0235788	7.14785
AZE	NH3	rail	4195.68	land	2024	base_without_pipeline	2.916	0.519845	0.0201406	3.45599
AZE	MeOH	truck	4195.68	land	2024	base_without_pipeline	3.46714	4.36351	0.00639424	7.83704
AZE	MeOH	rail	4195.68	land	2024	base_without_pipeline	3.46714	0.537047	0.00546187	4.00965
AZE	LOHC	truck	4195.68	land	2024	base_without_pipeline	3.54853	3.27263	0.014387	6.83555
AZE	LOHC	rail	4195.68	land	2024	base_without_pipeline	3.54853	0.402785	0.0122892	3.9636
AZE	LH2	ship	5306.93	maritime	2024	base_without_pipeline	3.268	1.26477	0.95396	5.48673	1197.06	rail	0.59853	3529.3	0.34693	580.565	barge	0.319311
AZE	NH3	ship	5306.93	maritime	2024	base_without_pipeline	2.916	0.396565	0.0343193	3.34688	1197.06	rail	0.148316	3529.3	0.124937	580.565	barge	0.123312
AZE	MeOH	ship	5306.93	maritime	2024	base_without_pipeline	3.46714	0.424442	0.00930693	3.90089	1197.06	rail	0.153224	3529.3	0.141172	580.565	barge	0.130047
AZE	LOHC	ship	5306.93	maritime	2024	base_without_pipeline	3.54853	0.318332	0.0209406	3.8878	1197.06	rail	0.114918	3529.3	0.105879	580.565	barge	0.0975349
BDI	CH2	truck	9731.92	land	2024	base_without_pipeline	0.263158	29.1958	3.09958	32.5585
BDI	LH2	truck	9731.92	land	2024	base_without_pipeline	3.268	5.83915	1.41203	10.5192
BDI	LH2	rail	9731.92	land	2024	base_without_pipeline	3.268	4.86596	1.19036	9.32432
BDI	NH3	truck	9731.92	land	2024	base_without_pipeline	2.916	9.76112	0.0507986	12.7279
BDI	NH3	rail	9731.92	land	2024	base_without_pipeline	2.916	1.20578	0.0428238	4.16461
BDI	MeOH	truck	9731.92	land	2024	base_without_pipeline	3.46714	10.1212	0.0137759	13.6021
BDI	MeOH	rail	9731.92	land	2024	base_without_pipeline	3.46714	1.24569	0.0116132	4.72444
BDI	LOHC	truck	9731.92	land	2024	base_without_pipeline	3.54853	7.5909	0.0309958	11.1704
BDI	LOHC	rail	9731.92	land	2024	base_without_pipeline	3.54853	0.934264	0.0261298	4.50892
BDI	LH2	ship	9992.07	maritime	2024	base_without_pipeline	3.268	1.79291	1.43419	6.4951	1365.32	rail	0.68266	8046.18	0.790939	580.565	barge	0.319311
BDI	NH3	ship	9992.07	maritime	2024	base_without_pipeline	2.916	0.57731	0.0515957	3.54491	1365.32	rail	0.169163	8046.18	0.284835	580.565	barge	0.123312
BDI	MeOH	ship	9992.07	maritime	2024	base_without_pipeline	3.46714	0.626655	0.0139921	4.10779	1365.32	rail	0.174761	8046.18	0.321847	580.565	barge	0.130047
BDI	LOHC	ship	9992.07	maritime	2024	base_without_pipeline	3.54853	0.469991	0.0314821	4.05	1365.32	rail	0.131071	8046.18	0.241385	580.565	barge	0.0975349
BEL	CH2	truck	560	land	2024	base_without_pipeline	0.263158	1.68	0.348	2.29116
BEL	LH2	truck	560	land	2024	base_without_pipeline	3.268	0.336	0.158533	3.76253
BEL	LH2	rail	560	land	2024	base_without_pipeline	3.268	0.28	0.145778	3.69378
BEL	LH2	barge	560	land	2024	base_without_pipeline	3.268	0.308	0.341667	3.91767
BEL	NH3	truck	560	land	2024	base_without_pipeline	2.916	0.56168	0.00570333	3.48338
BEL	NH3	rail	560	land	2024	base_without_pipeline	2.916	0.069384	0.00524444	2.99063
BEL	NH3	barge	560	land	2024	base_without_pipeline	2.916	0.118944	0.0122917	3.04724
BEL	MeOH	truck	560	land	2024	base_without_pipeline	3.46714	0.5824	0.00154667	4.05109
BEL	MeOH	rail	560	land	2024	base_without_pipeline	3.46714	0.07168	0.00142222	3.54025
BEL	MeOH	barge	560	land	2024	base_without_pipeline	3.46714	0.12544	0.00333333	3.59592
BEL	LOHC	truck	560	land	2024	base_without_pipeline	3.54853	0.4368	0.00348	3.98881
BEL	LOHC	rail	560	land	2024	base_without_pipeline	3.54853	0.05376	0.0032	3.60549
BEL	LOHC	barge	560	land	2024	base_without_pipeline	3.54853	0.09408	0.0075	3.65011
BEL	LH2	ship	4226.1	maritime	2024	base_without_pipeline	3.268	0.743711	0.843176	4.85489	131.64	truck	0.078984	3513.9	0.345416	580.565	barge	0.319311
BEL	NH3	ship	4226.1	maritime	2024	base_without_pipeline	2.916	0.379739	0.0303338	3.32607	131.64	truck	0.132035	3513.9	0.124392	580.565	barge	0.123312
BEL	MeOH	ship	4226.1	maritime	2024	base_without_pipeline	3.46714	0.407508	0.00822611	3.88288	131.64	truck	0.136906	3513.9	0.140556	580.565	barge	0.130047
BEL	LOHC	ship	4226.1	maritime	2024	base_without_pipeline	3.54853	0.305631	0.0185087	3.87267	131.64	truck	0.102679	3513.9	0.105417	580.565	barge	0.0975349
BEN	LH2	ship	7394.06	maritime	2024	base_without_pipeline	3.268	1.02927	1.16789	5.46516	80.1127	truck	0.0480676	6733.38	0.661891	580.565	barge	0.319311
BEN	NH3	ship	7394.06	maritime	2024	base_without_pipeline	2.916	0.442027	0.0420156	3.40004	80.1127	truck	0.080353	6733.38	0.238362	580.565	barge	0.123312
BEN	MeOH	ship	7394.06	maritime	2024	base_without_pipeline	3.46714	0.482699	0.0113941	3.96124	80.1127	truck	0.0833172	6733.38	0.269335	580.565	barge	0.130047
BEN	LOHC	ship	7394.06	maritime	2024	base_without_pipeline	3.54853	0.362024	0.0256366	3.93619	80.1127	truck	0.0624879	6733.38	0.202001	580.565	barge	0.0975349
BFA	CH2	truck	10128.7	land	2024	base_without_pipeline	0.263158	30.3861	3.21861	33.8679
BFA	LH2	truck	10128.7	land	2024	base_without_pipeline	3.268	6.07722	1.46626	10.8115
BFA	LH2	rail	10128.7	land	2024	base_without_pipeline	3.268	5.06435	1.23555	9.5679
BFA	NH3	truck	10128.7	land	2024	base_without_pipeline	2.916	10.1591	0.0527494	13.1278
BFA	NH3	rail	10128.7	land	2024	base_without_pipeline	2.916	1.25495	0.0444495	4.2154
BFA	MeOH	truck	10128.7	land	2024	base_without_pipeline	3.46714	10.5338	0.0143049	14.0153
BFA	MeOH	rail	10128.7	land	2024	base_without_pipeline	3.46714	1.29647	0.0120541	4.77567
BFA	LOHC	truck	10128.7	land	2024	base_without_pipeline	3.54853	7.90039	0.0321861	11.4811
BFA	LOHC	rail	10128.7	land	2024	base_without_pipeline	3.54853	0.972355	0.0271218	4.54801
BFA	LH2	ship	8200.97	maritime	2024	base_without_pipeline	3.268	1.55576	1.2506	6.07436	971.421	truck	0.582853	6648.98	0.653595	580.565	barge	0.319311
BFA	NH3	ship	8200.97	maritime	2024	base_without_pipeline	2.916	1.33302	0.0449911	4.29401	971.421	truck	0.974335	6648.98	0.235374	580.565	barge	0.123312
BFA	MeOH	ship	8200.97	maritime	2024	base_without_pipeline	3.46714	1.40628	0.012201	4.88563	971.421	truck	1.01028	6648.98	0.265959	580.565	barge	0.130047
BFA	LOHC	ship	8200.97	maritime	2024	base_without_pipeline	3.54853	1.05471	0.0274522	4.63069	971.421	truck	0.757708	6648.98	0.199469	580.565	barge	0.0975349
BGD	LH2	ship	12189.5	maritime	2024	base_without_pipeline	3.268	1.96016	1.65943	6.88758	995.978	truck	0.597587	10613	1.04326	580.565	barge	0.319311
BGD	NH3	ship	12189.5	maritime	2024	base_without_pipeline	2.916	1.49798	0.0596989	4.47368	995.978	truck	0.998966	10613	0.3757	580.565	barge	0.123312
BGD	MeOH	ship	12189.5	maritime	2024	base_without_pipeline	3.46714	1.59038	0.0161895	5.07372	995.978	truck	1.03582	10613	0.42452	580.565	barge	0.130047
BGD	LOHC	ship	12189.5	maritime	2024	base_without_pipeline	3.54853	1.19279	0.0364265	4.77774	995.978	truck	0.776863	10613	0.31839	580.565	barge	0.0975349
BGR	CH2	truck	1540	land	2024	base_without_pipeline	0.263158	4.62	0.642	5.52516
BGR	LH2	truck	1540	land	2024	base_without_pipeline	3.268	0.924	0.292467	4.48447
BGR	LH2	rail	1540	land	2024	base_without_pipeline	3.268	0.77	0.257389	4.29539
BGR	NH3	truck	1540	land	2024	base_without_pipeline	2.916	1.54462	0.0105217	4.47114
BGR	NH3	rail	1540	land	2024	base_without_pipeline	2.916	0.190806	0.00925972	3.11607
BGR	MeOH	truck	1540	land	2024	base_without_pipeline	3.46714	1.6016	0.00285333	5.0716
BGR	MeOH	rail	1540	land	2024	base_without_pipeline	3.46714	0.19712	0.00251111	3.66677
BGR	LOHC	truck	1540	land	2024	base_without_pipeline	3.54853	1.2012	0.00642	4.75615
BGR	LOHC	rail	1540	land	2024	base_without_pipeline	3.54853	0.14784	0.00565	3.70202
BGR	LH2	ship	3613.72	maritime	2024	base_without_pipeline	3.268	0.84381	0.780406	4.89222	451.146	truck	0.270688	2582.01	0.253812	580.565	barge	0.319311
BGR	NH3	ship	3613.72	maritime	2024	base_without_pipeline	2.916	0.667215	0.0280756	3.61129	451.146	truck	0.452499	2582.01	0.0914032	580.565	barge	0.123312
BGR	MeOH	ship	3613.72	maritime	2024	base_without_pipeline	3.46714	0.702519	0.00761372	4.17728	451.146	truck	0.469192	2582.01	0.10328	580.565	barge	0.130047
BGR	LOHC	ship	3613.72	maritime	2024	base_without_pipeline	3.54853	0.526889	0.0171309	4.09255	451.146	truck	0.351894	2582.01	0.0774603	580.565	barge	0.0975349
BHR	LH2	ship	8627.05	maritime	2024	base_without_pipeline	3.268	1.11028	1.29427	5.67255	0	none	0	8046.48	0.790969	580.565	barge	0.319311
BHR	NH3	ship	8627.05	maritime	2024	base_without_pipeline	2.916	0.408157	0.0465622	3.37072	0	none	0	8046.48	0.284845	580.565	barge	0.123312
BHR	MeOH	ship	8627.05	maritime	2024	base_without_pipeline	3.46714	0.451906	0.012627	3.93168	0	none	0	8046.48	0.321859	580.565	barge	0.130047
BHR	LOHC	ship	8627.05	maritime	2024	base_without_pipeline	3.54853	0.338929	0.0284109	3.91587	0	none	0	8046.48	0.241394	580.565	barge	0.0975349
BHS	LH2	ship	8441.42	maritime	2024	base_without_pipeline	3.268	1.09203	1.27525	5.63528	0	none	0	7860.86	0.772723	580.565	barge	0.319311
BHS	NH3	ship	8441.42	maritime	2024	base_without_pipeline	2.916	0.401586	0.0458778	3.36346	0	none	0	7860.86	0.278274	580.565	barge	0.123312
BHS	MeOH	ship	8441.42	maritime	2024	base_without_pipeline	3.46714	0.444481	0.0124414	3.92407	0	none	0	7860.86	0.314434	580.565	barge	0.130047
BHS	LOHC	ship	8441.42	maritime	2024	base_without_pipeline	3.54853	0.333361	0.0279932	3.90988	0	none	0	7860.86	0.235826	580.565	barge	0.0975349
BIH	CH2	truck	1270	land	2024	base_without_pipeline	0.263158	3.81	0.561	4.63416
BIH	LH2	truck	1270	land	2024	base_without_pipeline	3.268	0.762	0.255567	4.28557
BIH	LH2	rail	1270	land	2024	base_without_pipeline	3.268	0.635	0.226639	4.12964
BIH	NH3	truck	1270	land	2024	base_without_pipeline	2.916	1.27381	0.00919417	4.199
BIH	NH3	rail	1270	land	2024	base_without_pipeline	2.916	0.157353	0.00815347	3.08151
BIH	MeOH	truck	1270	land	2024	base_without_pipeline	3.46714	1.3208	0.00249333	4.79044
BIH	MeOH	rail	1270	land	2024	base_without_pipeline	3.46714	0.16256	0.00221111	3.63191
BIH	LOHC	truck	1270	land	2024	base_without_pipeline	3.54853	0.9906	0.00561	4.54474
BIH	LOHC	rail	1270	land	2024	base_without_pipeline	3.54853	0.12192	0.004975	3.67542
BIH	LH2	ship	2420.04	maritime	2024	base_without_pipeline	3.268	0.598854	0.658054	4.52491	196.777	truck	0.118066	1642.7	0.161477	580.565	barge	0.319311
BIH	NH3	ship	2420.04	maritime	2024	base_without_pipeline	2.916	0.378831	0.0236739	3.3185	196.777	truck	0.197367	1642.7	0.0581516	580.565	barge	0.123312
BIH	MeOH	ship	2420.04	maritime	2024	base_without_pipeline	3.46714	0.400403	0.00642004	3.87397	196.777	truck	0.204648	1642.7	0.065708	580.565	barge	0.130047
BIH	LOHC	ship	2420.04	maritime	2024	base_without_pipeline	3.54853	0.300302	0.0144451	3.86328	196.777	truck	0.153486	1642.7	0.049281	580.565	barge	0.0975349
BLR	CH2	truck	1760	land	2024	base_without_pipeline	0.263158	5.28	0.708	6.25116
BLR	LH2	truck	1760	land	2024	base_without_pipeline	3.268	1.056	0.322533	4.64653
BLR	LH2	rail	1760	land	2024	base_without_pipeline	3.268	0.88	0.282444	4.43044
BLR	NH3	truck	1760	land	2024	base_without_pipeline	2.916	1.76528	0.0116033	4.69288
BLR	NH3	rail	1760	land	2024	base_without_pipeline	2.916	0.218064	0.0101611	3.14423
BLR	MeOH	truck	1760	land	2024	base_without_pipeline	3.46714	1.8304	0.00314667	5.30069
BLR	MeOH	rail	1760	land	2024	base_without_pipeline	3.46714	0.22528	0.00275556	3.69518
BLR	LOHC	truck	1760	land	2024	base_without_pipeline	3.54853	1.3728	0.00708	4.92841
BLR	LOHC	rail	1760	land	2024	base_without_pipeline	3.54853	0.16896	0.0062	3.72369
BLR	LH2	ship	6266.98	maritime	2024	base_without_pipeline	3.268	1.14402	1.05237	5.46438	529.659	truck	0.317795	5156.76	0.50691	580.565	barge	0.319311
BLR	NH3	ship	6266.98	maritime	2024	base_without_pipeline	2.916	0.837109	0.0378595	3.79097	529.659	truck	0.531248	5156.76	0.182549	580.565	barge	0.123312
BLR	MeOH	ship	6266.98	maritime	2024	base_without_pipeline	3.46714	0.887162	0.010267	4.36457	529.659	truck	0.550845	5156.76	0.20627	580.565	barge	0.130047
BLR	LOHC	ship	6266.98	maritime	2024	base_without_pipeline	3.54853	0.665372	0.0231007	4.237	529.659	truck	0.413134	5156.76	0.154703	580.565	barge	0.0975349
BLZ	LH2	ship	9896.83	maritime	2024	base_without_pipeline	3.268	1.27415	1.42442	5.96658	77.8406	truck	0.0467044	9238.42	0.908137	580.565	barge	0.319311
BLZ	NH3	ship	9896.83	maritime	2024	base_without_pipeline	2.916	0.528426	0.0512445	3.49567	77.8406	truck	0.0780741	9238.42	0.32704	580.565	barge	0.123312
BLZ	MeOH	ship	9896.83	maritime	2024	base_without_pipeline	3.46714	0.580538	0.0138968	4.06158	77.8406	truck	0.0809542	9238.42	0.369537	580.565	barge	0.130047
BLZ	LOHC	ship	9896.83	maritime	2024	base_without_pipeline	3.54853	0.435403	0.0312679	4.0152	77.8406	truck	0.0607157	9238.42	0.277153	580.565	barge	0.0975349
BMU	LH2	ship	6979.92	maritime	2024	base_without_pipeline	3.268	0.948367	1.12544	5.34181	0	none	0	6399.35	0.629056	580.565	barge	0.319311
BMU	NH3	ship	6979.92	maritime	2024	base_without_pipeline	2.916	0.349849	0.0404884	3.30634	0	none	0	6399.35	0.226537	580.565	barge	0.123312
BMU	MeOH	ship	6979.92	maritime	2024	base_without_pipeline	3.46714	0.386021	0.0109799	3.86414	0	none	0	6399.35	0.255974	580.565	barge	0.130047
BMU	LOHC	ship	6979.92	maritime	2024	base_without_pipeline	3.54853	0.289515	0.0247048	3.86275	0	none	0	6399.35	0.19198	580.565	barge	0.0975349
BOL	LH2	ship	17429.4	maritime	2024	base_without_pipeline	3.268	2.98781	2.19651	8.45233	2519.94	rail	1.25997	14328.9	1.40853	580.565	barge	0.319311
BOL	NH3	ship	17429.4	maritime	2024	base_without_pipeline	2.916	0.942776	0.0790209	3.9378	2519.94	rail	0.312221	14328.9	0.507243	580.565	barge	0.123312
BOL	MeOH	ship	17429.4	maritime	2024	base_without_pipeline	3.46714	1.02575	0.0214294	4.51433	2519.94	rail	0.322552	14328.9	0.573156	580.565	barge	0.130047
BOL	LOHC	ship	17429.4	maritime	2024	base_without_pipeline	3.54853	0.769316	0.0482162	4.36606	2519.94	rail	0.241914	14328.9	0.429867	580.565	barge	0.0975349
BRA	LH2	ship	11597.5	maritime	2024	base_without_pipeline	3.268	1.85261	1.59875	6.71936	1121.07	rail	0.560535	9895.89	0.972766	580.565	barge	0.319311
BRA	NH3	ship	11597.5	maritime	2024	base_without_pipeline	2.916	0.612527	0.0575159	3.58604	1121.07	rail	0.138901	9895.89	0.350315	580.565	barge	0.123312
BRA	MeOH	ship	11597.5	maritime	2024	base_without_pipeline	3.46714	0.669379	0.0155975	4.15212	1121.07	rail	0.143497	9895.89	0.395836	580.565	barge	0.130047
BRA	LOHC	ship	11597.5	maritime	2024	base_without_pipeline	3.54853	0.502034	0.0350944	4.08566	1121.07	rail	0.107623	9895.89	0.296877	580.565	barge	0.0975349
BRB	LH2	ship	7232.49	maritime	2024	base_without_pipeline	3.268	0.973194	1.15133	5.39252	0	none	0	6651.92	0.653884	580.565	barge	0.319311
BRB	NH3	ship	7232.49	maritime	2024	base_without_pipeline	2.916	0.35879	0.0414198	3.31621	0	none	0	6651.92	0.235478	580.565	barge	0.123312
BRB	MeOH	ship	7232.49	maritime	2024	base_without_pipeline	3.46714	0.396123	0.0112325	3.8745	0	none	0	6651.92	0.266077	580.565	barge	0.130047
BRB	LOHC	ship	7232.49	maritime	2024	base_without_pipeline	3.54853	0.297093	0.0252731	3.8709	0	none	0	6651.92	0.199558	580.565	barge	0.0975349
BRN	LH2	ship	12879.4	maritime	2024	base_without_pipeline	3.268	1.54917	1.73014	6.54731	41.6274	truck	0.0249764	12257.2	1.20488	580.565	barge	0.319311
BRN	NH3	ship	12879.4	maritime	2024	base_without_pipeline	2.916	0.598969	0.0622428	3.57721	41.6274	truck	0.0417523	12257.2	0.433905	580.565	barge	0.123312
BRN	MeOH	ship	12879.4	maritime	2024	base_without_pipeline	3.46714	0.663627	0.0168794	4.14765	41.6274	truck	0.0432925	12257.2	0.490288	580.565	barge	0.130047
BRN	LOHC	ship	12879.4	maritime	2024	base_without_pipeline	3.54853	0.49772	0.0379786	4.08423	41.6274	truck	0.0324694	12257.2	0.367716	580.565	barge	0.0975349
BTN	CH2	truck	12033	land	2024	base_without_pipeline	0.263158	36.099	3.7899	40.1521
BTN	LH2	truck	12033	land	2024	base_without_pipeline	3.268	7.2198	1.72651	12.2143
BTN	LH2	rail	12033	land	2024	base_without_pipeline	3.268	6.0165	1.45243	10.7369
BTN	NH3	truck	12033	land	2024	base_without_pipeline	2.916	12.0691	0.0621123	15.0472
BTN	NH3	rail	12033	land	2024	base_without_pipeline	2.916	1.49089	0.0522519	4.45914
BTN	MeOH	truck	12033	land	2024	base_without_pipeline	3.46714	12.5143	0.016844	15.9983
BTN	MeOH	rail	12033	land	2024	base_without_pipeline	3.46714	1.54022	0.01417	5.02154
BTN	LOHC	truck	12033	land	2024	base_without_pipeline	3.54853	9.38574	0.037899	12.9722
BTN	LOHC	rail	12033	land	2024	base_without_pipeline	3.54853	1.15517	0.0318825	4.73558
BTN	LH2	ship	12263	maritime	2024	base_without_pipeline	3.268	1.89816	1.66696	6.83312	1071.62	rail	0.53581	10610.8	1.04304	580.565	barge	0.319311
BTN	NH3	ship	12263	maritime	2024	base_without_pipeline	2.916	0.631708	0.0599698	3.60768	1071.62	rail	0.132774	10610.8	0.375622	580.565	barge	0.123312
BTN	MeOH	ship	12263	maritime	2024	base_without_pipeline	3.46714	0.691646	0.016263	4.17505	1071.62	rail	0.137167	10610.8	0.424432	580.565	barge	0.130047
BTN	LOHC	ship	12263	maritime	2024	base_without_pipeline	3.54853	0.518734	0.0365917	4.10386	1071.62	rail	0.102876	10610.8	0.318324	580.565	barge	0.0975349
BWA	CH2	truck	13018.2	land	2024	base_without_pipeline	0.263158	39.0546	4.08546	43.4032
BWA	LH2	truck	13018.2	land	2024	base_without_pipeline	3.268	7.81092	1.86115	12.9401
BWA	LH2	rail	13018.2	land	2024	base_without_pipeline	3.268	6.5091	1.56463	11.3417
BWA	NH3	truck	13018.2	land	2024	base_without_pipeline	2.916	13.0573	0.0669562	16.0402
BWA	NH3	rail	13018.2	land	2024	base_without_pipeline	2.916	1.61295	0.0562885	4.58524
BWA	MeOH	truck	13018.2	land	2024	base_without_pipeline	3.46714	13.5389	0.0181576	17.0242
BWA	MeOH	rail	13018.2	land	2024	base_without_pipeline	3.46714	1.66633	0.0152647	5.14874
BWA	LOHC	truck	13018.2	land	2024	base_without_pipeline	3.54853	10.1542	0.0408546	13.7436
BWA	LOHC	rail	13018.2	land	2024	base_without_pipeline	3.54853	1.24975	0.0343455	4.83262
BWA	LH2	ship	12440	maritime	2024	base_without_pipeline	3.268	1.96022	1.6851	6.91332	947.029	truck	0.568217	10912.4	1.07269	580.565	barge	0.319311
BWA	NH3	ship	12440	maritime	2024	base_without_pipeline	2.916	1.45948	0.0606225	4.4361	947.029	truck	0.94987	10912.4	0.386299	580.565	barge	0.123312
BWA	MeOH	ship	12440	maritime	2024	base_without_pipeline	3.46714	1.55145	0.01644	5.03504	947.029	truck	0.98491	10912.4	0.436496	580.565	barge	0.130047
BWA	LOHC	ship	12440	maritime	2024	base_without_pipeline	3.54853	1.16359	0.03699	4.74911	947.029	truck	0.738683	10912.4	0.327372	580.565	barge	0.0975349
CAF	CH2	truck	9288.42	land	2024	base_without_pipeline	0.263158	27.8653	2.96653	31.0949
CAF	LH2	truck	9288.42	land	2024	base_without_pipeline	3.268	5.57305	1.35142	10.1925
CAF	LH2	rail	9288.42	land	2024	base_without_pipeline	3.268	4.64421	1.13985	9.05206
CAF	NH3	truck	9288.42	land	2024	base_without_pipeline	2.916	9.31629	0.0486181	12.2809
CAF	NH3	rail	9288.42	land	2024	base_without_pipeline	2.916	1.15084	0.0410067	4.10784
CAF	MeOH	truck	9288.42	land	2024	base_without_pipeline	3.46714	9.65996	0.0131846	13.1403
CAF	MeOH	rail	9288.42	land	2024	base_without_pipeline	3.46714	1.18892	0.0111205	4.66718
CAF	LOHC	truck	9288.42	land	2024	base_without_pipeline	3.54853	7.24497	0.0296653	10.8232
CAF	LOHC	rail	9288.42	land	2024	base_without_pipeline	3.54853	0.891688	0.025021	4.46524
CAF	LH2	ship	9235.3	maritime	2024	base_without_pipeline	3.268	1.68148	1.35662	6.3061	1273.12	rail	0.63656	7381.61	0.725612	580.565	barge	0.319311
CAF	NH3	ship	9235.3	maritime	2024	base_without_pipeline	2.916	0.542361	0.0488052	3.50717	1273.12	rail	0.15774	7381.61	0.261309	580.565	barge	0.123312
CAF	MeOH	ship	9235.3	maritime	2024	base_without_pipeline	3.46714	0.58827	0.0132353	4.06865	1273.12	rail	0.162959	7381.61	0.295264	580.565	barge	0.130047
CAF	LOHC	ship	9235.3	maritime	2024	base_without_pipeline	3.54853	0.441203	0.0297794	4.01951	1273.12	rail	0.12222	7381.61	0.221448	580.565	barge	0.0975349
CAN	LH2	ship	7841.81	maritime	2024	base_without_pipeline	3.268	1.47589	1.21379	5.95768	1102.32	rail	0.55116	6158.92	0.605422	580.565	barge	0.319311
CAN	NH3	ship	7841.81	maritime	2024	base_without_pipeline	2.916	0.477915	0.0436667	3.43758	1102.32	rail	0.136577	6158.92	0.218026	580.565	barge	0.123312
CAN	MeOH	ship	7841.81	maritime	2024	base_without_pipeline	3.46714	0.5175	0.0118418	3.99648	1102.32	rail	0.141097	6158.92	0.246357	580.565	barge	0.130047
CAN	LOHC	ship	7841.81	maritime	2024	base_without_pipeline	3.54853	0.388125	0.0266441	3.9633	1102.32	rail	0.105823	6158.92	0.184768	580.565	barge	0.0975349
CHL	LH2	ship	15025	maritime	2024	base_without_pipeline	3.268	1.79715	1.95006	7.01522	115.521	truck	0.0693126	14328.9	1.40853	580.565	barge	0.319311
CHL	NH3	ship	15025	maritime	2024	base_without_pipeline	2.916	0.746423	0.0701546	3.73258	115.521	truck	0.115868	14328.9	0.507243	580.565	barge	0.123312
CHL	MeOH	ship	15025	maritime	2024	base_without_pipeline	3.46714	0.823344	0.019025	4.30951	115.521	truck	0.120142	14328.9	0.573156	580.565	barge	0.130047
CHL	LOHC	ship	15025	maritime	2024	base_without_pipeline	3.54853	0.617508	0.0428062	4.20884	115.521	truck	0.0901064	14328.9	0.429867	580.565	barge	0.0975349
CHN	LH2	ship	17455	maritime	2024	base_without_pipeline	3.268	2.56007	2.19914	8.02721	1448.85	rail	0.724425	15425.6	1.51634	580.565	barge	0.319311
CHN	NH3	ship	17455	maritime	2024	base_without_pipeline	2.916	0.848891	0.0791154	3.84401	1448.85	rail	0.179513	15425.6	0.546066	580.565	barge	0.123312
CHN	MeOH	ship	17455	maritime	2024	base_without_pipeline	3.46714	0.932523	0.021455	4.42112	1448.85	rail	0.185453	15425.6	0.617024	580.565	barge	0.130047
CHN	LOHC	ship	17455	maritime	2024	base_without_pipeline	3.54853	0.699393	0.0482738	4.2962	1448.85	rail	0.13909	15425.6	0.462768	580.565	barge	0.0975349
CIV	LH2	ship	6915.64	maritime	2024	base_without_pipeline	3.268	1.06776	1.11885	5.45461	250.564	truck	0.150338	6084.51	0.598107	580.565	barge	0.319311
CIV	NH3	ship	6915.64	maritime	2024	base_without_pipeline	2.916	0.590019	0.0402514	3.54627	250.564	truck	0.251316	6084.51	0.215392	580.565	barge	0.123312
CIV	MeOH	ship	6915.64	maritime	2024	base_without_pipeline	3.46714	0.634014	0.0109156	4.11207	250.564	truck	0.260587	6084.51	0.24338	580.565	barge	0.130047
CIV	LOHC	ship	6915.64	maritime	2024	base_without_pipeline	3.54853	0.47551	0.0245602	4.0486	250.564	truck	0.19544	6084.51	0.182535	580.565	barge	0.0975349
CMR	LH2	ship	8245.79	maritime	2024	base_without_pipeline	3.268	1.21486	1.25519	5.73806	283.162	truck	0.169897	7382.06	0.725656	580.565	barge	0.319311
CMR	NH3	ship	8245.79	maritime	2024	base_without_pipeline	2.916	0.668648	0.0451563	3.6298	283.162	truck	0.284011	7382.06	0.261325	580.565	barge	0.123312
CMR	MeOH	ship	8245.79	maritime	2024	base_without_pipeline	3.46714	0.719817	0.0122458	4.19921	283.162	truck	0.294488	7382.06	0.295282	580.565	barge	0.130047
CMR	LOHC	ship	8245.79	maritime	2024	base_without_pipeline	3.54853	0.539863	0.027553	4.11595	283.162	truck	0.220866	7382.06	0.221462	580.565	barge	0.0975349
COD	LH2	ship	8785.69	maritime	2024	base_without_pipeline	3.268	1.12587	1.31053	5.70441	0	none	0	8205.12	0.806563	580.565	barge	0.319311
COD	NH3	ship	8785.69	maritime	2024	base_without_pipeline	2.916	0.413773	0.0471472	3.37692	0	none	0	8205.12	0.290461	580.565	barge	0.123312
COD	MeOH	ship	8785.69	maritime	2024	base_without_pipeline	3.46714	0.458251	0.0127857	3.93818	0	none	0	8205.12	0.328205	580.565	barge	0.130047
COD	LOHC	ship	8785.69	maritime	2024	base_without_pipeline	3.54853	0.343689	0.0287678	3.92099	0	none	0	8205.12	0.246154	580.565	barge	0.0975349
COG	LH2	ship	9120.69	maritime	2024	base_without_pipeline	3.268	1.37847	1.34487	5.99134	437.85	truck	0.26271	8102.27	0.796453	580.565	barge	0.319311
COG	NH3	ship	9120.69	maritime	2024	base_without_pipeline	2.916	0.849296	0.0483825	3.81368	437.85	truck	0.439164	8102.27	0.28682	580.565	barge	0.123312
COG	MeOH	ship	9120.69	maritime	2024	base_without_pipeline	3.46714	0.909501	0.0131207	4.38976	437.85	truck	0.455364	8102.27	0.324091	580.565	barge	0.130047
COG	LOHC	ship	9120.69	maritime	2024	base_without_pipeline	3.54853	0.682126	0.0295215	4.26018	437.85	truck	0.341523	8102.27	0.243068	580.565	barge	0.0975349
COK	LH2	ship	18573.8	maritime	2024	base_without_pipeline	3.268	2.08804	2.31381	7.66985	0	none	0	17993.2	1.76873	580.565	barge	0.319311
COK	NH3	ship	18573.8	maritime	2024	base_without_pipeline	2.916	0.760271	0.0832408	3.75951	0	none	0	17993.2	0.636959	580.565	barge	0.123312
COK	MeOH	ship	18573.8	maritime	2024	base_without_pipeline	3.46714	0.849775	0.0225738	4.33949	0	none	0	17993.2	0.719728	580.565	barge	0.130047
COK	LOHC	ship	18573.8	maritime	2024	base_without_pipeline	3.54853	0.637331	0.050791	4.23665	0	none	0	17993.2	0.539796	580.565	barge	0.0975349
COL	LH2	ship	9869.2	maritime	2024	base_without_pipeline	3.268	1.70101	1.42159	6.3906	934.081	truck	0.560449	8354.55	0.821252	580.565	barge	0.319311
COL	NH3	ship	9869.2	maritime	2024	base_without_pipeline	2.916	1.35595	0.0511427	4.32309	934.081	truck	0.936883	8354.55	0.295751	580.565	barge	0.123312
COL	MeOH	ship	9869.2	maritime	2024	base_without_pipeline	3.46714	1.43567	0.0138692	4.91668	934.081	truck	0.971444	8354.55	0.334182	580.565	barge	0.130047
COL	LOHC	ship	9869.2	maritime	2024	base_without_pipeline	3.54853	1.07675	0.0312057	4.65649	934.081	truck	0.728583	8354.55	0.250636	580.565	barge	0.0975349
COM	LH2	ship	9141.5	maritime	2024	base_without_pipeline	3.268	1.16085	1.347	5.77585	0	none	0	8560.93	0.841539	580.565	barge	0.319311
COM	NH3	ship	9141.5	maritime	2024	base_without_pipeline	2.916	0.426369	0.0484593	3.39083	0	none	0	8560.93	0.303057	580.565	barge	0.123312
COM	MeOH	ship	9141.5	maritime	2024	base_without_pipeline	3.46714	0.472484	0.0131415	3.95277	0	none	0	8560.93	0.342437	580.565	barge	0.130047
COM	LOHC	ship	9141.5	maritime	2024	base_without_pipeline	3.54853	0.354363	0.0295684	3.93246	0	none	0	8560.93	0.256828	580.565	barge	0.0975349
CPV	LH2	ship	4363.76	maritime	2024	base_without_pipeline	3.268	0.691199	0.857286	4.81649	0	none	0	3783.2	0.371889	580.565	barge	0.319311
CPV	NH3	ship	4363.76	maritime	2024	base_without_pipeline	2.916	0.257237	0.0308414	3.20408	0	none	0	3783.2	0.133925	580.565	barge	0.123312
CPV	MeOH	ship	4363.76	maritime	2024	base_without_pipeline	3.46714	0.281375	0.00836377	3.75688	0	none	0	3783.2	0.151328	580.565	barge	0.130047
CPV	LOHC	ship	4363.76	maritime	2024	base_without_pipeline	3.54853	0.211031	0.0188185	3.77838	0	none	0	3783.2	0.113496	580.565	barge	0.0975349
CRI	LH2	ship	9822.7	maritime	2024	base_without_pipeline	3.268	1.29888	1.41683	5.9837	141.645	truck	0.084987	9100.49	0.894578	580.565	barge	0.319311
CRI	NH3	ship	9822.7	maritime	2024	base_without_pipeline	2.916	0.587539	0.0509712	3.55451	141.645	truck	0.14207	9100.49	0.322157	580.565	barge	0.123312
CRI	MeOH	ship	9822.7	maritime	2024	base_without_pipeline	3.46714	0.641377	0.0138227	4.12234	141.645	truck	0.147311	9100.49	0.36402	580.565	barge	0.130047
CRI	LOHC	ship	9822.7	maritime	2024	base_without_pipeline	3.54853	0.481033	0.0311011	4.06066	141.645	truck	0.110483	9100.49	0.273015	580.565	barge	0.0975349
CUB	LH2	ship	9297.24	maritime	2024	base_without_pipeline	3.268	1.17616	1.36297	5.80713	0	none	0	8716.67	0.856849	580.565	barge	0.319311
CUB	NH3	ship	9297.24	maritime	2024	base_without_pipeline	2.916	0.431882	0.0490336	3.39692	0	none	0	8716.67	0.30857	580.565	barge	0.123312
CUB	MeOH	ship	9297.24	maritime	2024	base_without_pipeline	3.46714	0.478713	0.0132972	3.95915	0	none	0	8716.67	0.348667	580.565	barge	0.130047
CUB	LOHC	ship	9297.24	maritime	2024	base_without_pipeline	3.54853	0.359035	0.0299188	3.93748	0	none	0	8716.67	0.2615	580.565	barge	0.0975349
CYM	LH2	ship	9074.82	maritime	2024	base_without_pipeline	3.268	1.1543	1.34017	5.76246	0	none	0	8494.25	0.834985	580.565	barge	0.319311
CYM	NH3	ship	9074.82	maritime	2024	base_without_pipeline	2.916	0.424008	0.0482134	3.38822	0	none	0	8494.25	0.300696	580.565	barge	0.123312
CYM	MeOH	ship	9074.82	maritime	2024	base_without_pipeline	3.46714	0.469817	0.0130748	3.95003	0	none	0	8494.25	0.33977	580.565	barge	0.130047
CYM	LOHC	ship	9074.82	maritime	2024	base_without_pipeline	3.54853	0.352362	0.0294183	3.93031	0	none	0	8494.25	0.254827	580.565	barge	0.0975349
CYP	LH2	ship	3027.38	maritime	2024	base_without_pipeline	3.268	0.581356	0.720307	4.56966	42.8995	truck	0.0257397	2403.92	0.236305	580.565	barge	0.319311
CYP	NH3	ship	3027.38	maritime	2024	base_without_pipeline	2.916	0.251439	0.0259135	3.19335	42.8995	truck	0.0430282	2403.92	0.0850988	580.565	barge	0.123312
CYP	MeOH	ship	3027.38	maritime	2024	base_without_pipeline	3.46714	0.270819	0.00702738	3.74499	42.8995	truck	0.0446155	2403.92	0.0961568	580.565	barge	0.130047
CYP	LOHC	ship	3027.38	maritime	2024	base_without_pipeline	3.54853	0.203114	0.0158116	3.76746	42.8995	truck	0.0334616	2403.92	0.0721176	580.565	barge	0.0975349
CZE	CH2	truck	720	land	2024	base_without_pipeline	0.263158	2.16	0.396	2.81916
CZE	LH2	truck	720	land	2024	base_without_pipeline	3.268	0.432	0.1804	3.8804
CZE	LH2	rail	720	land	2024	base_without_pipeline	3.268	0.36	0.164	3.792
CZE	LH2	barge	720	land	2024	base_without_pipeline	3.268	0.396	0.369	4.033
CZE	NH3	truck	720	land	2024	base_without_pipeline	2.916	0.72216	0.00649	3.64465
CZE	NH3	rail	720	land	2024	base_without_pipeline	2.916	0.089208	0.0059	3.01111
CZE	NH3	barge	720	land	2024	base_without_pipeline	2.916	0.152928	0.013275	3.0822
CZE	MeOH	truck	720	land	2024	base_without_pipeline	3.46714	0.7488	0.00176	4.2177
CZE	MeOH	rail	720	land	2024	base_without_pipeline	3.46714	0.09216	0.0016	3.5609
CZE	MeOH	barge	720	land	2024	base_without_pipeline	3.46714	0.16128	0.0036	3.63202
CZE	LOHC	truck	720	land	2024	base_without_pipeline	3.54853	0.5616	0.00396	4.11409
CZE	LOHC	rail	720	land	2024	base_without_pipeline	3.54853	0.06912	0.0036	3.62125
CZE	LOHC	barge	720	land	2024	base_without_pipeline	3.54853	0.12096	0.0081	3.67759
DEU	CH2	truck	870	land	2024	base_without_pipeline	0.263158	2.61	0.441	3.31416
DEU	LH2	truck	870	land	2024	base_without_pipeline	3.268	0.522	0.2009	3.9909
DEU	LH2	rail	870	land	2024	base_without_pipeline	3.268	0.435	0.181083	3.88408
DEU	LH2	barge	870	land	2024	base_without_pipeline	3.268	0.4785	0.394625	4.14113
DEU	NH3	truck	870	land	2024	base_without_pipeline	2.916	0.87261	0.0072275	3.79584
DEU	NH3	rail	870	land	2024	base_without_pipeline	2.916	0.107793	0.00651458	3.03031
DEU	NH3	barge	870	land	2024	base_without_pipeline	2.916	0.184788	0.0141969	3.11498
DEU	MeOH	truck	870	land	2024	base_without_pipeline	3.46714	0.9048	0.00196	4.3739
DEU	MeOH	rail	870	land	2024	base_without_pipeline	3.46714	0.11136	0.00176667	3.58027
DEU	MeOH	barge	870	land	2024	base_without_pipeline	3.46714	0.19488	0.00385	3.66587
DEU	LOHC	truck	870	land	2024	base_without_pipeline	3.54853	0.6786	0.00441	4.23154
DEU	LOHC	rail	870	land	2024	base_without_pipeline	3.54853	0.08352	0.003975	3.63602
DEU	LOHC	barge	870	land	2024	base_without_pipeline	3.54853	0.14616	0.0086625	3.70335
DEU	LH2	ship	4740.86	maritime	2024	base_without_pipeline	3.268	0.924292	0.895939	5.08823	390.719	truck	0.234431	3769.58	0.37055	580.565	barge	0.319311
DEU	NH3	ship	4740.86	maritime	2024	base_without_pipeline	2.916	0.648646	0.0322319	3.59688	390.719	truck	0.391891	3769.58	0.133443	580.565	barge	0.123312
DEU	MeOH	ship	4740.86	maritime	2024	base_without_pipeline	3.46714	0.687178	0.00874086	4.16306	390.719	truck	0.406348	3769.58	0.150783	580.565	barge	0.130047
DEU	LOHC	ship	4740.86	maritime	2024	base_without_pipeline	3.54853	0.515383	0.0196669	4.08358	390.719	truck	0.304761	3769.58	0.113087	580.565	barge	0.0975349
DJI	LH2	ship	5379.57	maritime	2024	base_without_pipeline	3.268	0.940296	0.961406	5.1697	297.475	truck	0.178485	4501.53	0.4425	580.565	barge	0.319311
DJI	NH3	ship	5379.57	maritime	2024	base_without_pipeline	2.916	0.581034	0.0345872	3.53162	297.475	truck	0.298367	4501.53	0.159354	580.565	barge	0.123312
DJI	MeOH	ship	5379.57	maritime	2024	base_without_pipeline	3.46714	0.619482	0.00937957	4.096	297.475	truck	0.309374	4501.53	0.180061	580.565	barge	0.130047
DJI	LOHC	ship	5379.57	maritime	2024	base_without_pipeline	3.54853	0.464611	0.021104	4.03424	297.475	truck	0.232031	4501.53	0.135046	580.565	barge	0.0975349
DMA	LH2	ship	7298.84	maritime	2024	base_without_pipeline	3.268	0.979717	1.15813	5.40585	0	none	0	6718.27	0.660406	580.565	barge	0.319311
DMA	NH3	ship	7298.84	maritime	2024	base_without_pipeline	2.916	0.361139	0.0416645	3.3188	0	none	0	6718.27	0.237827	580.565	barge	0.123312
DMA	MeOH	ship	7298.84	maritime	2024	base_without_pipeline	3.46714	0.398777	0.0112988	3.87722	0	none	0	6718.27	0.268731	580.565	barge	0.130047
DMA	LOHC	ship	7298.84	maritime	2024	base_without_pipeline	3.54853	0.299083	0.0254224	3.87303	0	none	0	6718.27	0.201548	580.565	barge	0.0975349
DNK	CH2	truck	1170	land	2024	base_without_pipeline	0.263158	3.51	0.531	4.30416
DNK	LH2	truck	1170	land	2024	base_without_pipeline	3.268	0.702	0.2419	4.2119
DNK	LH2	rail	1170	land	2024	base_without_pipeline	3.268	0.585	0.21525	4.06825
DNK	NH3	truck	1170	land	2024	base_without_pipeline	2.916	1.17351	0.0087025	4.09821
DNK	NH3	rail	1170	land	2024	base_without_pipeline	2.916	0.144963	0.00774375	3.06871
DNK	MeOH	truck	1170	land	2024	base_without_pipeline	3.46714	1.2168	0.00236	4.6863
DNK	MeOH	rail	1170	land	2024	base_without_pipeline	3.46714	0.14976	0.0021	3.619
DNK	LOHC	truck	1170	land	2024	base_without_pipeline	3.54853	0.9126	0.00531	4.46644
DNK	LOHC	rail	1170	land	2024	base_without_pipeline	3.54853	0.11232	0.004725	3.66557
DNK	LH2	ship	5151.67	maritime	2024	base_without_pipeline	3.268	0.768651	0.938047	4.9747	0	none	0	4571.11	0.44934	580.565	barge	0.319311
DNK	NH3	ship	5151.67	maritime	2024	base_without_pipeline	2.916	0.285129	0.0337468	3.23488	0	none	0	4571.11	0.161817	580.565	barge	0.123312
DNK	MeOH	ship	5151.67	maritime	2024	base_without_pipeline	3.46714	0.312891	0.00915168	3.78919	0	none	0	4571.11	0.182844	580.565	barge	0.130047
DNK	LOHC	ship	5151.67	maritime	2024	base_without_pipeline	3.54853	0.234668	0.0205913	3.80379	0	none	0	4571.11	0.137133	580.565	barge	0.0975349
DOM	LH2	ship	7937.07	maritime	2024	base_without_pipeline	3.268	1.04245	1.22355	5.534	0	none	0	7356.5	0.723144	580.565	barge	0.319311
DOM	NH3	ship	7937.07	maritime	2024	base_without_pipeline	2.916	0.383732	0.0440179	3.34375	0	none	0	7356.5	0.26042	580.565	barge	0.123312
DOM	MeOH	ship	7937.07	maritime	2024	base_without_pipeline	3.46714	0.424307	0.0119371	3.90339	0	none	0	7356.5	0.29426	580.565	barge	0.130047
DOM	LOHC	ship	7937.07	maritime	2024	base_without_pipeline	3.54853	0.31823	0.0268584	3.89362	0	none	0	7356.5	0.220695	580.565	barge	0.0975349
DZA	LH2	ship	1831.15	maritime	2024	base_without_pipeline	3.268	0.635877	0.597692	4.50157	385.957	truck	0.231574	864.624	0.0849925	580.565	barge	0.319311
DZA	NH3	ship	1831.15	maritime	2024	base_without_pipeline	2.916	0.541035	0.0215024	3.47854	385.957	truck	0.387115	864.624	0.0306077	580.565	barge	0.123312
DZA	MeOH	ship	1831.15	maritime	2024	base_without_pipeline	3.46714	0.566027	0.00583115	4.039	385.957	truck	0.401395	864.624	0.034585	580.565	barge	0.130047
DZA	LOHC	ship	1831.15	maritime	2024	base_without_pipeline	3.54853	0.42452	0.0131201	3.98617	385.957	truck	0.301046	864.624	0.0259387	580.565	barge	0.0975349
ECU	LH2	ship	11028.2	maritime	2024	base_without_pipeline	3.268	1.52029	1.54039	6.32868	346.764	truck	0.208058	10100.9	0.992918	580.565	barge	0.319311
ECU	NH3	ship	11028.2	maritime	2024	base_without_pipeline	2.916	0.828688	0.0554166	3.8001	346.764	truck	0.347804	10100.9	0.357572	580.565	barge	0.123312
ECU	MeOH	ship	11028.2	maritime	2024	base_without_pipeline	3.46714	0.894717	0.0150282	4.37689	346.764	truck	0.360635	10100.9	0.404036	580.565	barge	0.130047
ECU	LOHC	ship	11028.2	maritime	2024	base_without_pipeline	3.54853	0.671038	0.0338135	4.25338	346.764	truck	0.270476	10100.9	0.303027	580.565	barge	0.0975349
EGY	LH2	ship	2781.48	maritime	2024	base_without_pipeline	3.268	0.623456	0.695102	4.58656	174.995	truck	0.104997	2025.92	0.199148	580.565	barge	0.319311
EGY	NH3	ship	2781.48	maritime	2024	base_without_pipeline	2.916	0.37055	0.0250067	3.31156	174.995	truck	0.17552	2025.92	0.0717176	580.565	barge	0.123312
EGY	MeOH	ship	2781.48	maritime	2024	base_without_pipeline	3.46714	0.393078	0.00678148	3.867	174.995	truck	0.181995	2025.92	0.0810368	580.565	barge	0.130047
EGY	LOHC	ship	2781.48	maritime	2024	base_without_pipeline	3.54853	0.294809	0.0152583	3.8586	174.995	truck	0.136496	2025.92	0.0607776	580.565	barge	0.0975349
ERI	LH2	ship	5563.33	maritime	2024	base_without_pipeline	3.268	1.10632	0.980242	5.35456	592.388	truck	0.355433	4390.38	0.431574	580.565	barge	0.319311
ERI	NH3	ship	5563.33	maritime	2024	base_without_pipeline	2.916	0.872897	0.0352648	3.82416	592.388	truck	0.594165	4390.38	0.155419	580.565	barge	0.123312
ERI	MeOH	ship	5563.33	maritime	2024	base_without_pipeline	3.46714	0.921745	0.00956333	4.39845	592.388	truck	0.616084	4390.38	0.175615	580.565	barge	0.130047
ERI	LOHC	ship	5563.33	maritime	2024	base_without_pipeline	3.54853	0.691309	0.0215175	4.26136	592.388	truck	0.462063	4390.38	0.131711	580.565	barge	0.0975349
ESP	CH2	truck	1600	land	2024	base_without_pipeline	0.263158	4.8	0.66	5.72316
ESP	LH2	truck	1600	land	2024	base_without_pipeline	3.268	0.96	0.300667	4.52867
ESP	LH2	rail	1600	land	2024	base_without_pipeline	3.268	0.8	0.264222	4.33222
ESP	NH3	truck	1600	land	2024	base_without_pipeline	2.916	1.6048	0.0108167	4.53162
ESP	NH3	rail	1600	land	2024	base_without_pipeline	2.916	0.19824	0.00950556	3.12375
ESP	MeOH	truck	1600	land	2024	base_without_pipeline	3.46714	1.664	0.00293333	5.13408
ESP	MeOH	rail	1600	land	2024	base_without_pipeline	3.46714	0.2048	0.00257778	3.67452
ESP	LOHC	truck	1600	land	2024	base_without_pipeline	3.54853	1.248	0.0066	4.80313
ESP	LOHC	rail	1600	land	2024	base_without_pipeline	3.54853	0.1536	0.0058	3.70793
ESP	LH2	ship	2305.48	maritime	2024	base_without_pipeline	3.268	0.817639	0.646311	4.73195	655.311	truck	0.393187	1069.6	0.105142	580.565	barge	0.319311
ESP	NH3	ship	2305.48	maritime	2024	base_without_pipeline	2.916	0.818453	0.0232514	3.7577	655.311	truck	0.657277	1069.6	0.0378638	580.565	barge	0.123312
ESP	MeOH	ship	2305.48	maritime	2024	base_without_pipeline	3.46714	0.854354	0.00630548	4.3278	655.311	truck	0.681523	1069.6	0.042784	580.565	barge	0.130047
ESP	LOHC	ship	2305.48	maritime	2024	base_without_pipeline	3.54853	0.640765	0.0141873	4.20348	655.311	truck	0.511143	1069.6	0.032088	580.565	barge	0.0975349
EST	CH2	truck	2080	land	2024	base_without_pipeline	0.263158	6.24	0.804	7.30716
EST	LH2	truck	2080	land	2024	base_without_pipeline	3.268	1.248	0.366267	4.88227
EST	LH2	rail	2080	land	2024	base_without_pipeline	3.268	1.04	0.318889	4.62689
EST	NH3	truck	2080	land	2024	base_without_pipeline	2.916	2.08624	0.0131767	5.01542
EST	NH3	rail	2080	land	2024	base_without_pipeline	2.916	0.257712	0.0114722	3.18518
EST	MeOH	truck	2080	land	2024	base_without_pipeline	3.46714	2.1632	0.00357333	5.63392
EST	MeOH	rail	2080	land	2024	base_without_pipeline	3.46714	0.26624	0.00311111	3.73649
EST	LOHC	truck	2080	land	2024	base_without_pipeline	3.54853	1.6224	0.00804	5.17897
EST	LOHC	rail	2080	land	2024	base_without_pipeline	3.54853	0.19968	0.007	3.75521
EST	LH2	ship	5790.33	maritime	2024	base_without_pipeline	3.268	0.842834	1.00351	5.11434	22.7279	truck	0.0136367	5187.04	0.509886	580.565	barge	0.319311
EST	NH3	ship	5790.33	maritime	2024	base_without_pipeline	2.916	0.329729	0.0361019	3.28183	22.7279	truck	0.0227961	5187.04	0.183621	580.565	barge	0.123312
EST	MeOH	ship	5790.33	maritime	2024	base_without_pipeline	3.46714	0.361165	0.00979033	3.8381	22.7279	truck	0.023637	5187.04	0.207482	580.565	barge	0.130047
EST	LOHC	ship	5790.33	maritime	2024	base_without_pipeline	3.54853	0.270874	0.0220282	3.84143	22.7279	truck	0.0177278	5187.04	0.155611	580.565	barge	0.0975349
ETH	CH2	truck	7870.61	land	2024	base_without_pipeline	0.263158	23.6118	2.54118	26.4162
ETH	LH2	truck	7870.61	land	2024	base_without_pipeline	3.268	4.72237	1.15765	9.14802
ETH	LH2	rail	7870.61	land	2024	base_without_pipeline	3.268	3.93531	0.978375	8.18168
ETH	NH3	truck	7870.61	land	2024	base_without_pipeline	2.916	7.89422	0.0416472	10.8519
ETH	NH3	rail	7870.61	land	2024	base_without_pipeline	2.916	0.975169	0.0351976	3.92637
ETH	MeOH	truck	7870.61	land	2024	base_without_pipeline	3.46714	8.18543	0.0112941	11.6639
ETH	MeOH	rail	7870.61	land	2024	base_without_pipeline	3.46714	1.00744	0.00954512	4.48413
ETH	LOHC	truck	7870.61	land	2024	base_without_pipeline	3.54853	6.13908	0.0254118	9.71302
ETH	LOHC	rail	7870.61	land	2024	base_without_pipeline	3.54853	0.755579	0.0214765	4.32558
ETH	LH2	ship	5832.95	maritime	2024	base_without_pipeline	3.268	1.26916	1.00788	5.54504	864.141	truck	0.518485	4388.24	0.431364	580.565	barge	0.319311
ETH	NH3	ship	5832.95	maritime	2024	base_without_pipeline	2.916	1.14539	0.036259	4.09765	864.141	truck	0.866733	4388.24	0.155344	580.565	barge	0.123312
ETH	MeOH	ship	5832.95	maritime	2024	base_without_pipeline	3.46714	1.20428	0.00983295	4.68126	864.141	truck	0.898707	4388.24	0.17553	580.565	barge	0.130047
ETH	LOHC	ship	5832.95	maritime	2024	base_without_pipeline	3.54853	0.903212	0.0221241	4.47387	864.141	truck	0.67403	4388.24	0.131647	580.565	barge	0.0975349
FIN	CH2	truck	2240	land	2024	base_without_pipeline	0.263158	6.72	0.852	7.83516
FIN	LH2	truck	2240	land	2024	base_without_pipeline	3.268	1.344	0.388133	5.00013
FIN	LH2	rail	2240	land	2024	base_without_pipeline	3.268	1.12	0.337111	4.72511
FIN	NH3	truck	2240	land	2024	base_without_pipeline	2.916	2.24672	0.0139633	5.17668
FIN	NH3	rail	2240	land	2024	base_without_pipeline	2.916	0.277536	0.0121278	3.20566
FIN	MeOH	truck	2240	land	2024	base_without_pipeline	3.46714	2.3296	0.00378667	5.80053
FIN	MeOH	rail	2240	land	2024	base_without_pipeline	3.46714	0.28672	0.00328889	3.75715
FIN	LOHC	truck	2240	land	2024	base_without_pipeline	3.54853	1.7472	0.00852	5.30425
FIN	LOHC	rail	2240	land	2024	base_without_pipeline	3.54853	0.21504	0.0074	3.77097
FIN	LH2	ship	5783.88	maritime	2024	base_without_pipeline	3.268	0.830796	1.00285	5.10164	0	none	0	5203.31	0.511485	580.565	barge	0.319311
FIN	NH3	ship	5783.88	maritime	2024	base_without_pipeline	2.916	0.307509	0.036078	3.25959	0	none	0	5203.31	0.184197	580.565	barge	0.123312
FIN	MeOH	ship	5783.88	maritime	2024	base_without_pipeline	3.46714	0.338179	0.00978388	3.81511	0	none	0	5203.31	0.208132	580.565	barge	0.130047
FIN	LOHC	ship	5783.88	maritime	2024	base_without_pipeline	3.54853	0.253634	0.0220137	3.82418	0	none	0	5203.31	0.156099	580.565	barge	0.0975349
FJI	LH2	ship	19915.5	maritime	2024	base_without_pipeline	3.268	2.21993	2.45134	7.93927	0	none	0	19334.9	1.90062	580.565	barge	0.319311
FJI	NH3	ship	19915.5	maritime	2024	base_without_pipeline	2.916	0.807767	0.0881883	3.81196	0	none	0	19334.9	0.684455	580.565	barge	0.123312
FJI	MeOH	ship	19915.5	maritime	2024	base_without_pipeline	3.46714	0.903443	0.0239155	4.3945	0	none	0	19334.9	0.773396	580.565	barge	0.130047
FJI	LOHC	ship	19915.5	maritime	2024	base_without_pipeline	3.54853	0.677582	0.0538098	4.27992	0	none	0	19334.9	0.580047	580.565	barge	0.0975349
FLK	LH2	ship	13844.1	maritime	2024	base_without_pipeline	3.268	1.62311	1.82902	6.72013	0	none	0	13263.5	1.3038	580.565	barge	0.319311
FLK	NH3	ship	13844.1	maritime	2024	base_without_pipeline	2.916	0.59284	0.0658	3.57464	0	none	0	13263.5	0.469528	580.565	barge	0.123312
FLK	MeOH	ship	13844.1	maritime	2024	base_without_pipeline	3.46714	0.660587	0.0178441	4.14557	0	none	0	13263.5	0.53054	580.565	barge	0.130047
FLK	LOHC	ship	13844.1	maritime	2024	base_without_pipeline	3.54853	0.49544	0.0401491	4.08412	0	none	0	13263.5	0.397905	580.565	barge	0.0975349
FRA	CH2	truck	570	land	2024	base_without_pipeline	0.263158	1.71	0.351	2.32416
FRA	LH2	truck	570	land	2024	base_without_pipeline	3.268	0.342	0.1599	3.7699
FRA	LH2	rail	570	land	2024	base_without_pipeline	3.268	0.285	0.146917	3.69992
FRA	LH2	barge	570	land	2024	base_without_pipeline	3.268	0.3135	0.343375	3.92488
FRA	NH3	truck	570	land	2024	base_without_pipeline	2.916	0.57171	0.0057525	3.49346
FRA	NH3	rail	570	land	2024	base_without_pipeline	2.916	0.070623	0.00528542	2.99191
FRA	NH3	barge	570	land	2024	base_without_pipeline	2.916	0.121068	0.0123531	3.04942
FRA	MeOH	truck	570	land	2024	base_without_pipeline	3.46714	0.5928	0.00156	4.0615
FRA	MeOH	rail	570	land	2024	base_without_pipeline	3.46714	0.07296	0.00143333	3.54154
FRA	MeOH	barge	570	land	2024	base_without_pipeline	3.46714	0.12768	0.00335	3.59817
FRA	LOHC	truck	570	land	2024	base_without_pipeline	3.54853	0.4446	0.00351	3.99664
FRA	LOHC	rail	570	land	2024	base_without_pipeline	3.54853	0.05472	0.003225	3.60647
FRA	LOHC	barge	570	land	2024	base_without_pipeline	3.54853	0.09576	0.0075375	3.65183
FRO	LH2	ship	5042.84	maritime	2024	base_without_pipeline	3.268	0.757953	0.926892	4.95284	0	none	0	4462.28	0.438642	580.565	barge	0.319311
FRO	NH3	ship	5042.84	maritime	2024	base_without_pipeline	2.916	0.281277	0.0333455	3.23062	0	none	0	4462.28	0.157965	580.565	barge	0.123312
FRO	MeOH	ship	5042.84	maritime	2024	base_without_pipeline	3.46714	0.308538	0.00904285	3.78472	0	none	0	4462.28	0.178491	580.565	barge	0.130047
FRO	LOHC	ship	5042.84	maritime	2024	base_without_pipeline	3.54853	0.231403	0.0203464	3.80028	0	none	0	4462.28	0.133868	580.565	barge	0.0975349
FSM	LH2	ship	16366.3	maritime	2024	base_without_pipeline	3.268	1.87105	2.08754	7.22659	0	none	0	15785.7	1.55173	580.565	barge	0.319311
FSM	NH3	ship	16366.3	maritime	2024	base_without_pipeline	2.916	0.682126	0.0751006	3.67323	0	none	0	15785.7	0.558814	580.565	barge	0.123312
FSM	MeOH	ship	16366.3	maritime	2024	base_without_pipeline	3.46714	0.761475	0.0203663	4.24898	0	none	0	15785.7	0.631428	580.565	barge	0.130047
FSM	LOHC	ship	16366.3	maritime	2024	base_without_pipeline	3.54853	0.571106	0.0458241	4.16546	0	none	0	15785.7	0.473571	580.565	barge	0.0975349
GAB	LH2	ship	8175.36	maritime	2024	base_without_pipeline	3.268	1.07285	1.24797	5.58883	13.8995	truck	0.0083397	7580.9	0.745202	580.565	barge	0.319311
GAB	NH3	ship	8175.36	maritime	2024	base_without_pipeline	2.916	0.405617	0.0448967	3.36651	13.8995	truck	0.0139412	7580.9	0.268364	580.565	barge	0.123312
GAB	MeOH	ship	8175.36	maritime	2024	base_without_pipeline	3.46714	0.447738	0.0121754	3.92706	13.8995	truck	0.0144555	7580.9	0.303236	580.565	barge	0.130047
GAB	LOHC	ship	8175.36	maritime	2024	base_without_pipeline	3.54853	0.335804	0.0273946	3.91173	13.8995	truck	0.0108416	7580.9	0.227427	580.565	barge	0.0975349
GBR	CH2	truck	1000	land	2024	base_without_pipeline	0.263158	3	0.48	3.74316
GBR	LH2	truck	1000	land	2024	base_without_pipeline	3.268	0.6	0.218667	4.08667
GBR	LH2	rail	1000	land	2024	base_without_pipeline	3.268	0.5	0.195889	3.96389
GBR	NH3	truck	1000	land	2024	base_without_pipeline	2.916	1.003	0.00786667	3.92687
GBR	NH3	rail	1000	land	2024	base_without_pipeline	2.916	0.1239	0.00704722	3.04695
GBR	MeOH	truck	1000	land	2024	base_without_pipeline	3.46714	1.04	0.00213333	4.50928
GBR	MeOH	rail	1000	land	2024	base_without_pipeline	3.46714	0.128	0.00191111	3.59705
GBR	LOHC	truck	1000	land	2024	base_without_pipeline	3.54853	0.78	0.0048	4.33333
GBR	LOHC	rail	1000	land	2024	base_without_pipeline	3.54853	0.096	0.0043	3.64883
GBR	LH2	ship	3901.55	maritime	2024	base_without_pipeline	3.268	0.69366	0.809909	4.77157	95.468	truck	0.0572808	3225.52	0.317069	580.565	barge	0.319311
GBR	NH3	ship	3901.55	maritime	2024	base_without_pipeline	2.916	0.33325	0.029137	3.27839	95.468	truck	0.0957544	3225.52	0.114183	580.565	barge	0.123312
GBR	MeOH	ship	3901.55	maritime	2024	base_without_pipeline	3.46714	0.358354	0.00790155	3.8334	95.468	truck	0.0992867	3225.52	0.129021	580.565	barge	0.130047
GBR	LOHC	ship	3901.55	maritime	2024	base_without_pipeline	3.54853	0.268766	0.0177785	3.83507	95.468	truck	0.074465	3225.52	0.0967656	580.565	barge	0.0975349
GEO	LH2	ship	4632.76	maritime	2024	base_without_pipeline	3.268	0.936262	0.884858	5.08912	435.759	truck	0.261455	3616.44	0.355496	580.565	barge	0.319311
GEO	NH3	ship	4632.76	maritime	2024	base_without_pipeline	2.916	0.6884	0.0318333	3.63623	435.759	truck	0.437066	3616.44	0.128022	580.565	barge	0.123312
GEO	MeOH	ship	4632.76	maritime	2024	base_without_pipeline	3.46714	0.727894	0.00863276	4.20367	435.759	truck	0.453189	3616.44	0.144658	580.565	barge	0.130047
GEO	LOHC	ship	4632.76	maritime	2024	base_without_pipeline	3.54853	0.54592	0.0194237	4.11387	435.759	truck	0.339892	3616.44	0.108493	580.565	barge	0.0975349
GHA	LH2	ship	7100.75	maritime	2024	base_without_pipeline	3.268	0.967512	1.13783	5.37334	14.4853	truck	0.00869118	6505.7	0.63951	580.565	barge	0.319311
GHA	NH3	ship	7100.75	maritime	2024	base_without_pipeline	2.916	0.368143	0.040934	3.32508	14.4853	truck	0.0145288	6505.7	0.230302	580.565	barge	0.123312
GHA	MeOH	ship	7100.75	maritime	2024	base_without_pipeline	3.46714	0.405339	0.0111008	3.88358	14.4853	truck	0.0150647	6505.7	0.260228	580.565	barge	0.130047
GHA	LOHC	ship	7100.75	maritime	2024	base_without_pipeline	3.54853	0.304004	0.0249767	3.87751	14.4853	truck	0.0112985	6505.7	0.195171	580.565	barge	0.0975349
GIB	LH2	ship	1643.6	maritime	2024	base_without_pipeline	3.268	0.423807	0.578468	4.27028	0	none	0	1063.03	0.104496	580.565	barge	0.319311
GIB	NH3	ship	1643.6	maritime	2024	base_without_pipeline	2.916	0.160943	0.0208108	3.09775	0	none	0	1063.03	0.0376313	580.565	barge	0.123312
GIB	MeOH	ship	1643.6	maritime	2024	base_without_pipeline	3.46714	0.172568	0.0056436	3.64535	0	none	0	1063.03	0.0425212	580.565	barge	0.130047
GIB	LOHC	ship	1643.6	maritime	2024	base_without_pipeline	3.54853	0.129426	0.0126981	3.69065	0	none	0	1063.03	0.0318909	580.565	barge	0.0975349
GIN	LH2	ship	5271.84	maritime	2024	base_without_pipeline	3.268	0.780463	0.950363	4.99883	0	none	0	4691.27	0.461152	580.565	barge	0.319311
GIN	NH3	ship	5271.84	maritime	2024	base_without_pipeline	2.916	0.289383	0.0341899	3.23957	0	none	0	4691.27	0.166071	580.565	barge	0.123312
GIN	MeOH	ship	5271.84	maritime	2024	base_without_pipeline	3.46714	0.317697	0.00927184	3.79411	0	none	0	4691.27	0.187651	580.565	barge	0.130047
GIN	LOHC	ship	5271.84	maritime	2024	base_without_pipeline	3.54853	0.238273	0.0208616	3.80766	0	none	0	4691.27	0.140738	580.565	barge	0.0975349
GLP	LH2	ship	7270.57	maritime	2024	base_without_pipeline	3.268	0.976938	1.15523	5.40017	0	none	0	6690	0.657627	580.565	barge	0.319311
GLP	NH3	ship	7270.57	maritime	2024	base_without_pipeline	2.916	0.360138	0.0415602	3.3177	0	none	0	6690	0.236826	580.565	barge	0.123312
GLP	MeOH	ship	7270.57	maritime	2024	base_without_pipeline	3.46714	0.397647	0.0112706	3.87606	0	none	0	6690	0.2676	580.565	barge	0.130047
GLP	LOHC	ship	7270.57	maritime	2024	base_without_pipeline	3.54853	0.298235	0.0253588	3.87212	0	none	0	6690	0.2007	580.565	barge	0.0975349
GMB	LH2	ship	4615.93	maritime	2024	base_without_pipeline	3.268	0.715988	0.883133	4.86712	0	none	0	4035.37	0.396677	580.565	barge	0.319311
GMB	NH3	ship	4615.93	maritime	2024	base_without_pipeline	2.916	0.266164	0.0317713	3.21394	0	none	0	4035.37	0.142852	580.565	barge	0.123312
GMB	MeOH	ship	4615.93	maritime	2024	base_without_pipeline	3.46714	0.291461	0.00861593	3.76722	0	none	0	4035.37	0.161415	580.565	barge	0.130047
GMB	LOHC	ship	4615.93	maritime	2024	base_without_pipeline	3.54853	0.218596	0.0193859	3.78651	0	none	0	4035.37	0.121061	580.565	barge	0.0975349
GNB	LH2	ship	4930.22	maritime	2024	base_without_pipeline	3.268	0.766017	0.915347	4.94936	38.1421	truck	0.0228853	4311.51	0.423821	580.565	barge	0.319311
GNB	NH3	ship	4930.22	maritime	2024	base_without_pipeline	2.916	0.314196	0.0329302	3.26313	38.1421	truck	0.0382565	4311.51	0.152627	580.565	barge	0.123312
GNB	MeOH	ship	4930.22	maritime	2024	base_without_pipeline	3.46714	0.342175	0.00893022	3.81825	38.1421	truck	0.0396678	4311.51	0.17246	580.565	barge	0.130047
GNB	LOHC	ship	4930.22	maritime	2024	base_without_pipeline	3.54853	0.256631	0.020093	3.82525	38.1421	truck	0.0297508	4311.51	0.129345	580.565	barge	0.0975349
GNQ	LH2	ship	8141.59	maritime	2024	base_without_pipeline	3.268	1.06256	1.24451	5.57507	0	none	0	7561.02	0.743248	580.565	barge	0.319311
GNQ	NH3	ship	8141.59	maritime	2024	base_without_pipeline	2.916	0.390972	0.0447721	3.35174	0	none	0	7561.02	0.26766	580.565	barge	0.123312
GNQ	MeOH	ship	8141.59	maritime	2024	base_without_pipeline	3.46714	0.432487	0.0121416	3.91177	0	none	0	7561.02	0.302441	580.565	barge	0.130047
GNQ	LOHC	ship	8141.59	maritime	2024	base_without_pipeline	3.54853	0.324366	0.0273186	3.90021	0	none	0	7561.02	0.226831	580.565	barge	0.0975349
GRC	CH2	truck	2150	land	2024	base_without_pipeline	0.263158	6.45	0.825	7.53816
GRC	LH2	truck	2150	land	2024	base_without_pipeline	3.268	1.29	0.375833	4.93383
GRC	LH2	rail	2150	land	2024	base_without_pipeline	3.268	1.075	0.326861	4.66986
GRC	NH3	truck	2150	land	2024	base_without_pipeline	2.916	2.15645	0.0135208	5.08597
GRC	NH3	rail	2150	land	2024	base_without_pipeline	2.916	0.266385	0.011759	3.19414
GRC	MeOH	truck	2150	land	2024	base_without_pipeline	3.46714	2.236	0.00366667	5.70681
GRC	MeOH	rail	2150	land	2024	base_without_pipeline	3.46714	0.2752	0.00318889	3.74553
GRC	LOHC	truck	2150	land	2024	base_without_pipeline	3.54853	1.677	0.00825	5.23378
GRC	LOHC	rail	2150	land	2024	base_without_pipeline	3.54853	0.2064	0.007175	3.7621
GRC	LH2	ship	2208.23	maritime	2024	base_without_pipeline	3.268	0.49315	0.636344	4.39749	27.5863	truck	0.0165518	1600.08	0.157288	580.565	barge	0.319311
GRC	NH3	ship	2208.23	maritime	2024	base_without_pipeline	2.916	0.207624	0.0228929	3.14652	27.5863	truck	0.0276691	1600.08	0.0566428	580.565	barge	0.123312
GRC	MeOH	ship	2208.23	maritime	2024	base_without_pipeline	3.46714	0.22274	0.00620823	3.69609	27.5863	truck	0.0286898	1600.08	0.0640032	580.565	barge	0.130047
GRC	LOHC	ship	2208.23	maritime	2024	base_without_pipeline	3.54853	0.167055	0.0139685	3.72955	27.5863	truck	0.0215173	1600.08	0.0480024	580.565	barge	0.0975349
GRD	LH2	ship	7455.95	maritime	2024	base_without_pipeline	3.268	0.995162	1.17424	5.4374	0	none	0	6875.39	0.675851	580.565	barge	0.319311
GRD	NH3	ship	7455.95	maritime	2024	base_without_pipeline	2.916	0.366701	0.0422438	3.32494	0	none	0	6875.39	0.243389	580.565	barge	0.123312
GRD	MeOH	ship	7455.95	maritime	2024	base_without_pipeline	3.46714	0.405062	0.011456	3.88366	0	none	0	6875.39	0.275016	580.565	barge	0.130047
GRD	LOHC	ship	7455.95	maritime	2024	base_without_pipeline	3.54853	0.303797	0.0257759	3.8781	0	none	0	6875.39	0.206262	580.565	barge	0.0975349
GRL	LH2	ship	5505.82	maritime	2024	base_without_pipeline	3.268	0.803463	0.974346	5.04581	0	none	0	4925.25	0.484152	580.565	barge	0.319311
GRL	NH3	ship	5505.82	maritime	2024	base_without_pipeline	2.916	0.297666	0.0350527	3.24872	0	none	0	4925.25	0.174354	580.565	barge	0.123312
GRL	MeOH	ship	5505.82	maritime	2024	base_without_pipeline	3.46714	0.327057	0.00950582	3.80371	0	none	0	4925.25	0.19701	580.565	barge	0.130047
GRL	LOHC	ship	5505.82	maritime	2024	base_without_pipeline	3.54853	0.245292	0.0213881	3.81521	0	none	0	4925.25	0.147758	580.565	barge	0.0975349
GTM	LH2	ship	11370.8	maritime	2024	base_without_pipeline	3.268	1.47948	1.5755	6.32298	198.31	truck	0.118986	10591.9	1.04118	580.565	barge	0.319311
GTM	NH3	ship	11370.8	maritime	2024	base_without_pipeline	2.916	0.69717	0.0566797	3.66985	198.31	truck	0.198905	10591.9	0.374953	580.565	barge	0.123312
GTM	MeOH	ship	11370.8	maritime	2024	base_without_pipeline	3.46714	0.759965	0.0153708	4.24248	198.31	truck	0.206242	10591.9	0.423676	580.565	barge	0.130047
GTM	LOHC	ship	11370.8	maritime	2024	base_without_pipeline	3.54853	0.569974	0.0345842	4.15309	198.31	truck	0.154682	10591.9	0.317757	580.565	barge	0.0975349
GUF	LH2	ship	6960.05	maritime	2024	base_without_pipeline	3.268	0.946414	1.1234	5.33782	0	none	0	6379.48	0.627103	580.565	barge	0.319311
GUF	NH3	ship	6960.05	maritime	2024	base_without_pipeline	2.916	0.349146	0.0404152	3.30556	0	none	0	6379.48	0.225834	580.565	barge	0.123312
GUF	MeOH	ship	6960.05	maritime	2024	base_without_pipeline	3.46714	0.385226	0.01096	3.86333	0	none	0	6379.48	0.255179	580.565	barge	0.130047
GUF	LOHC	ship	6960.05	maritime	2024	base_without_pipeline	3.54853	0.288919	0.0246601	3.86211	0	none	0	6379.48	0.191384	580.565	barge	0.0975349
GUM	LH2	ship	16300.1	maritime	2024	base_without_pipeline	3.268	1.86454	2.08076	7.21329	0	none	0	15719.5	1.54523	580.565	barge	0.319311
GUM	NH3	ship	16300.1	maritime	2024	base_without_pipeline	2.916	0.679782	0.0748565	3.67064	0	none	0	15719.5	0.55647	580.565	barge	0.123312
GUM	MeOH	ship	16300.1	maritime	2024	base_without_pipeline	3.46714	0.758827	0.0203001	4.24627	0	none	0	15719.5	0.62878	580.565	barge	0.130047
GUM	LOHC	ship	16300.1	maritime	2024	base_without_pipeline	3.54853	0.56912	0.0456751	4.16332	0	none	0	15719.5	0.471585	580.565	barge	0.0975349
GUY	LH2	ship	7443.05	maritime	2024	base_without_pipeline	3.268	1.01623	1.17291	5.45715	44.5269	truck	0.0267161	6817.96	0.670205	580.565	barge	0.319311
GUY	NH3	ship	7443.05	maritime	2024	base_without_pipeline	2.916	0.409328	0.0421963	3.36752	44.5269	truck	0.0446605	6817.96	0.241356	580.565	barge	0.123312
GUY	MeOH	ship	7443.05	maritime	2024	base_without_pipeline	3.46714	0.449073	0.0114431	3.92766	44.5269	truck	0.046308	6817.96	0.272718	580.565	barge	0.130047
GUY	LOHC	ship	7443.05	maritime	2024	base_without_pipeline	3.54853	0.336805	0.0257469	3.91108	44.5269	truck	0.034731	6817.96	0.204539	580.565	barge	0.0975349
HKG	LH2	ship	14635.2	maritime	2024	base_without_pipeline	3.268	1.70088	1.9101	6.87898	0	none	0	14054.6	1.38157	580.565	barge	0.319311
HKG	NH3	ship	14635.2	maritime	2024	base_without_pipeline	2.916	0.620845	0.0687172	3.60556	0	none	0	14054.6	0.497533	580.565	barge	0.123312
HKG	MeOH	ship	14635.2	maritime	2024	base_without_pipeline	3.46714	0.692231	0.0186352	4.17801	0	none	0	14054.6	0.562184	580.565	barge	0.130047
HKG	LOHC	ship	14635.2	maritime	2024	base_without_pipeline	3.54853	0.519173	0.0419291	4.10963	0	none	0	14054.6	0.421638	580.565	barge	0.0975349
HND	LH2	ship	10109.9	maritime	2024	base_without_pipeline	3.268	1.3941	1.44627	6.10837	275.164	truck	0.165098	9254.22	0.90969	580.565	barge	0.319311
HND	NH3	ship	10109.9	maritime	2024	base_without_pipeline	2.916	0.726901	0.0520304	3.69493	275.164	truck	0.275989	9254.22	0.327599	580.565	barge	0.123312
HND	MeOH	ship	10109.9	maritime	2024	base_without_pipeline	3.46714	0.786386	0.0141099	4.26764	275.164	truck	0.286171	9254.22	0.370169	580.565	barge	0.130047
HND	LOHC	ship	10109.9	maritime	2024	base_without_pipeline	3.54853	0.589789	0.0317474	4.17007	275.164	truck	0.214628	9254.22	0.277627	580.565	barge	0.0975349
HRV	CH2	truck	940	land	2024	base_without_pipeline	0.263158	2.82	0.462	3.54516
HRV	LH2	truck	940	land	2024	base_without_pipeline	3.268	0.564	0.210467	4.04247
HRV	LH2	rail	940	land	2024	base_without_pipeline	3.268	0.47	0.189056	3.92706
HRV	NH3	truck	940	land	2024	base_without_pipeline	2.916	0.94282	0.00757167	3.86639
HRV	NH3	rail	940	land	2024	base_without_pipeline	2.916	0.116466	0.00680139	3.03927
HRV	MeOH	truck	940	land	2024	base_without_pipeline	3.46714	0.9776	0.00205333	4.4468
HRV	MeOH	rail	940	land	2024	base_without_pipeline	3.46714	0.12032	0.00184444	3.58931
HRV	LOHC	truck	940	land	2024	base_without_pipeline	3.54853	0.7332	0.00462	4.28635
HRV	LOHC	rail	940	land	2024	base_without_pipeline	3.54853	0.09024	0.00415	3.64292
HRV	LH2	ship	2748.42	maritime	2024	base_without_pipeline	3.268	0.664618	0.691713	4.62433	263.518	truck	0.158111	1904.34	0.187197	580.565	barge	0.319311
HRV	NH3	ship	2748.42	maritime	2024	base_without_pipeline	2.916	0.455034	0.0248848	3.39592	263.518	truck	0.264309	1904.34	0.0674136	580.565	barge	0.123312
HRV	MeOH	ship	2748.42	maritime	2024	base_without_pipeline	3.46714	0.480279	0.00674842	3.95417	263.518	truck	0.274059	1904.34	0.0761736	580.565	barge	0.130047
HRV	LOHC	ship	2748.42	maritime	2024	base_without_pipeline	3.54853	0.360209	0.015184	3.92392	263.518	truck	0.205544	1904.34	0.0571302	580.565	barge	0.0975349
HTI	LH2	ship	8200.27	maritime	2024	base_without_pipeline	3.268	1.06833	1.25053	5.58686	0	none	0	7619.71	0.749017	580.565	barge	0.319311
HTI	NH3	ship	8200.27	maritime	2024	base_without_pipeline	2.916	0.39305	0.0449885	3.35404	0	none	0	7619.71	0.269738	580.565	barge	0.123312
HTI	MeOH	ship	8200.27	maritime	2024	base_without_pipeline	3.46714	0.434835	0.0122003	3.91418	0	none	0	7619.71	0.304788	580.565	barge	0.130047
HTI	LOHC	ship	8200.27	maritime	2024	base_without_pipeline	3.54853	0.326126	0.0274506	3.90211	0	none	0	7619.71	0.228591	580.565	barge	0.0975349
HUN	LH2	rail	1097.11	land	2024	base_without_pipeline	3.268	0.548555	0.206949	4.0235
HUN	LH2	barge	1097.11	land	2024	base_without_pipeline	3.268	0.60341	0.433423	4.30483
HUN	NH3	rail	1097.11	land	2024	base_without_pipeline	2.916	0.135932	0.0074451	3.05938
HUN	NH3	barge	1097.11	land	2024	base_without_pipeline	2.916	0.233026	0.0155927	3.16462
HUN	MeOH	rail	1097.11	land	2024	base_without_pipeline	3.46714	0.14043	0.00201901	3.60959
HUN	MeOH	barge	1097.11	land	2024	base_without_pipeline	3.46714	0.245753	0.00422852	3.71712
HUN	LOHC	rail	1097.11	land	2024	base_without_pipeline	3.54853	0.105323	0.00454277	3.65839
HUN	LOHC	barge	1097.11	land	2024	base_without_pipeline	3.54853	0.184314	0.00951416	3.74236
IDN	LH2	ship	12275.8	maritime	2024	base_without_pipeline	3.268	1.46895	1.66827	6.40521	0	none	0	11695.2	1.14964	580.565	barge	0.319311
IDN	NH3	ship	12275.8	maritime	2024	base_without_pipeline	2.916	0.537322	0.0600169	3.51334	0	none	0	11695.2	0.41401	580.565	barge	0.123312
IDN	MeOH	ship	12275.8	maritime	2024	base_without_pipeline	3.46714	0.597855	0.0162758	4.08127	0	none	0	11695.2	0.467808	580.565	barge	0.130047
IDN	LOHC	ship	12275.8	maritime	2024	base_without_pipeline	3.54853	0.448391	0.0366205	4.03354	0	none	0	11695.2	0.350856	580.565	barge	0.0975349
IND	LH2	ship	9739.44	maritime	2024	base_without_pipeline	3.268	1.7467	1.40829	6.42299	1312.1	rail	0.65605	7846.77	0.771337	580.565	barge	0.319311
IND	NH3	ship	9739.44	maritime	2024	base_without_pipeline	2.916	0.563657	0.0506642	3.53032	1312.1	rail	0.162569	7846.77	0.277776	580.565	barge	0.123312
IND	MeOH	ship	9739.44	maritime	2024	base_without_pipeline	3.46714	0.611866	0.0137394	4.09275	1312.1	rail	0.167949	7846.77	0.313871	580.565	barge	0.130047
IND	LOHC	ship	9739.44	maritime	2024	base_without_pipeline	3.54853	0.4589	0.0309137	4.03834	1312.1	rail	0.125962	7846.77	0.235403	580.565	barge	0.0975349
IRL	LH2	ship	4061.66	maritime	2024	base_without_pipeline	3.268	0.661502	0.82632	4.75582	0	none	0	3481.09	0.342191	580.565	barge	0.319311
IRL	NH3	ship	4061.66	maritime	2024	base_without_pipeline	2.916	0.246543	0.0297274	3.19227	0	none	0	3481.09	0.123231	580.565	barge	0.123312
IRL	MeOH	ship	4061.66	maritime	2024	base_without_pipeline	3.46714	0.26929	0.00806166	3.74449	0	none	0	3481.09	0.139244	580.565	barge	0.130047
IRL	LOHC	ship	4061.66	maritime	2024	base_without_pipeline	3.54853	0.201968	0.0181387	3.76864	0	none	0	3481.09	0.104433	580.565	barge	0.0975349
IRN	LH2	ship	9736.8	maritime	2024	base_without_pipeline	3.268	1.83515	1.40802	6.51117	1532.94	rail	0.76647	7623.29	0.749369	580.565	barge	0.319311
IRN	NH3	ship	9736.8	maritime	2024	base_without_pipeline	2.916	0.583108	0.0506544	3.54976	1532.94	rail	0.189931	7623.29	0.269864	580.565	barge	0.123312
IRN	MeOH	ship	9736.8	maritime	2024	base_without_pipeline	3.46714	0.631194	0.0137368	4.11207	1532.94	rail	0.196216	7623.29	0.304932	580.565	barge	0.130047
IRN	LOHC	ship	9736.8	maritime	2024	base_without_pipeline	3.54853	0.473396	0.0309078	4.05283	1532.94	rail	0.147162	7623.29	0.228699	580.565	barge	0.0975349
IRQ	LH2	ship	9500.48	maritime	2024	base_without_pipeline	3.268	1.51731	1.3838	6.16911	640.169	truck	0.384101	8279.75	0.813899	580.565	barge	0.319311
IRQ	NH3	ship	9500.48	maritime	2024	base_without_pipeline	2.916	1.0585	0.049783	4.02429	640.169	truck	0.64209	8279.75	0.293103	580.565	barge	0.123312
IRQ	MeOH	ship	9500.48	maritime	2024	base_without_pipeline	3.46714	1.12701	0.0135005	4.60766	640.169	truck	0.665776	8279.75	0.33119	580.565	barge	0.130047
IRQ	LOHC	ship	9500.48	maritime	2024	base_without_pipeline	3.54853	0.845259	0.0303761	4.42416	640.169	truck	0.499332	8279.75	0.248392	580.565	barge	0.0975349
ISL	LH2	ship	5215.78	maritime	2024	base_without_pipeline	3.268	0.801285	0.944618	5.0139	52.4861	truck	0.0314917	4582.73	0.450482	580.565	barge	0.319311
ISL	NH3	ship	5215.78	maritime	2024	base_without_pipeline	2.916	0.338184	0.0339832	3.28817	52.4861	truck	0.0526436	4582.73	0.162229	580.565	barge	0.123312
ISL	MeOH	ship	5215.78	maritime	2024	base_without_pipeline	3.46714	0.367941	0.00921578	3.8443	52.4861	truck	0.0545855	4582.73	0.183309	580.565	barge	0.130047
ISL	LOHC	ship	5215.78	maritime	2024	base_without_pipeline	3.54853	0.275956	0.0207355	3.84522	52.4861	truck	0.0409392	4582.73	0.137482	580.565	barge	0.0975349
ISR	LH2	ship	2917.78	maritime	2024	base_without_pipeline	3.268	0.575638	0.709073	4.55271	52.9774	truck	0.0317864	2284.24	0.224541	580.565	barge	0.319311
ISR	NH3	ship	2917.78	maritime	2024	base_without_pipeline	2.916	0.25731	0.0255093	3.19882	52.9774	truck	0.0531363	2284.24	0.0808621	580.565	barge	0.123312
ISR	MeOH	ship	2917.78	maritime	2024	base_without_pipeline	3.46714	0.276513	0.00691778	3.75057	52.9774	truck	0.0550965	2284.24	0.0913696	580.565	barge	0.130047
ISR	LOHC	ship	2917.78	maritime	2024	base_without_pipeline	3.54853	0.207384	0.015565	3.77148	52.9774	truck	0.0413224	2284.24	0.0685272	580.565	barge	0.0975349
ITA	CH2	truck	915	land	2024	base_without_pipeline	0.263158	2.745	0.4545	3.46266
ITA	LH2	truck	915	land	2024	base_without_pipeline	3.268	0.549	0.20705	4.02405
ITA	LH2	rail	915	land	2024	base_without_pipeline	3.268	0.4575	0.186208	3.91171
ITA	NH3	truck	915	land	2024	base_without_pipeline	2.916	0.917745	0.00744875	3.84119
ITA	NH3	rail	915	land	2024	base_without_pipeline	2.916	0.113368	0.00669896	3.03607
ITA	MeOH	truck	915	land	2024	base_without_pipeline	3.46714	0.9516	0.00202	4.42076
ITA	MeOH	rail	915	land	2024	base_without_pipeline	3.46714	0.11712	0.00181667	3.58608
ITA	LOHC	truck	915	land	2024	base_without_pipeline	3.54853	0.7137	0.004545	4.26677
ITA	LOHC	rail	915	land	2024	base_without_pipeline	3.54853	0.08784	0.0040875	3.64046
ITA	LH2	ship	1110.17	maritime	2024	base_without_pipeline	3.268	0.37843	0.523792	4.17022	14.0711	truck	0.00844266	515.53	0.0506766	580.565	barge	0.319311
ITA	NH3	ship	1110.17	maritime	2024	base_without_pipeline	2.916	0.155675	0.0188437	3.09052	14.0711	truck	0.0141133	515.53	0.0182498	580.565	barge	0.123312
ITA	MeOH	ship	1110.17	maritime	2024	base_without_pipeline	3.46714	0.165302	0.00511017	3.63755	14.0711	truck	0.0146339	515.53	0.0206212	580.565	barge	0.130047
ITA	LOHC	ship	1110.17	maritime	2024	base_without_pipeline	3.54853	0.123976	0.0114979	3.684	14.0711	truck	0.0109755	515.53	0.0154659	580.565	barge	0.0975349
JAM	LH2	ship	8747.55	maritime	2024	base_without_pipeline	3.268	1.15164	1.30662	5.72627	58.8357	truck	0.0353014	8108.15	0.797031	580.565	barge	0.319311
JAM	NH3	ship	8747.55	maritime	2024	base_without_pipeline	2.916	0.469353	0.0470066	3.43236	58.8357	truck	0.0590122	8108.15	0.287029	580.565	barge	0.123312
JAM	MeOH	ship	8747.55	maritime	2024	base_without_pipeline	3.46714	0.515562	0.0127476	3.99545	58.8357	truck	0.0611891	8108.15	0.324326	580.565	barge	0.130047
JAM	LOHC	ship	8747.55	maritime	2024	base_without_pipeline	3.54853	0.386671	0.028682	3.96388	58.8357	truck	0.0458918	8108.15	0.243245	580.565	barge	0.0975349
JOR	LH2	ship	3718.09	maritime	2024	base_without_pipeline	3.268	0.788769	0.791104	4.84787	320.987	truck	0.192592	2816.54	0.276866	580.565	barge	0.319311
JOR	NH3	ship	3718.09	maritime	2024	base_without_pipeline	2.916	0.544967	0.0284605	3.48943	320.987	truck	0.32195	2816.54	0.0997055	580.565	barge	0.123312
JOR	MeOH	ship	3718.09	maritime	2024	base_without_pipeline	3.46714	0.576535	0.00771809	4.0514	320.987	truck	0.333826	2816.54	0.112662	580.565	barge	0.130047
JOR	LOHC	ship	3718.09	maritime	2024	base_without_pipeline	3.54853	0.432401	0.0173657	3.9983	320.987	truck	0.25037	2816.54	0.0844962	580.565	barge	0.0975349
JPN	LH2	ship	17413.2	maritime	2024	base_without_pipeline	3.268	2.16341	2.19485	7.62626	377.624	truck	0.226574	16455	1.61753	580.565	barge	0.319311
JPN	NH3	ship	17413.2	maritime	2024	base_without_pipeline	2.916	1.08458	0.0789611	4.07954	377.624	truck	0.378757	16455	0.582507	580.565	barge	0.123312
JPN	MeOH	ship	17413.2	maritime	2024	base_without_pipeline	3.46714	1.18098	0.0214132	4.66953	377.624	truck	0.392729	16455	0.6582	580.565	barge	0.130047
JPN	LOHC	ship	17413.2	maritime	2024	base_without_pipeline	3.54853	0.885732	0.0481797	4.48244	377.624	truck	0.294547	16455	0.49365	580.565	barge	0.0975349
KAZ	CH2	truck	5289.9	land	2024	base_without_pipeline	0.263158	15.8697	1.76697	17.8998
KAZ	LH2	truck	5289.9	land	2024	base_without_pipeline	3.268	3.17394	0.804953	7.24689
KAZ	LH2	rail	5289.9	land	2024	base_without_pipeline	3.268	2.64495	0.684461	6.59741
KAZ	NH3	truck	5289.9	land	2024	base_without_pipeline	2.916	5.30577	0.0289587	8.25073
KAZ	NH3	rail	5289.9	land	2024	base_without_pipeline	2.916	0.655419	0.0246239	3.59604
KAZ	MeOH	truck	5289.9	land	2024	base_without_pipeline	3.46714	5.5015	0.0078532	8.97649
KAZ	MeOH	rail	5289.9	land	2024	base_without_pipeline	3.46714	0.677107	0.00667767	4.15093
KAZ	LOHC	truck	5289.9	land	2024	base_without_pipeline	3.54853	4.12612	0.0176697	7.69232
KAZ	LOHC	rail	5289.9	land	2024	base_without_pipeline	3.54853	0.50783	0.0150247	4.07138
KAZ	LH2	ship	7194.4	maritime	2024	base_without_pipeline	3.268	2.20851	1.14743	6.62393	3084.53	rail	1.54226	3529.3	0.34693	580.565	barge	0.319311
KAZ	NH3	ship	7194.4	maritime	2024	base_without_pipeline	2.916	0.630422	0.0412793	3.5877	3084.53	rail	0.382173	3529.3	0.124937	580.565	barge	0.123312
KAZ	MeOH	ship	7194.4	maritime	2024	base_without_pipeline	3.46714	0.666038	0.0111944	4.14438	3084.53	rail	0.39482	3529.3	0.141172	580.565	barge	0.130047
KAZ	LOHC	ship	7194.4	maritime	2024	base_without_pipeline	3.54853	0.499529	0.0251874	4.07325	3084.53	rail	0.296115	3529.3	0.105879	580.565	barge	0.0975349
KEN	LH2	ship	8833.38	maritime	2024	base_without_pipeline	3.268	1.38881	1.31542	5.97224	514.753	truck	0.308852	7738.06	0.760651	580.565	barge	0.319311
KEN	NH3	ship	8833.38	maritime	2024	base_without_pipeline	2.916	0.913537	0.0473231	3.87686	514.753	truck	0.516297	7738.06	0.273927	580.565	barge	0.123312
KEN	MeOH	ship	8833.38	maritime	2024	base_without_pipeline	3.46714	0.974912	0.0128334	4.45489	514.753	truck	0.535343	7738.06	0.309522	580.565	barge	0.130047
KEN	LOHC	ship	8833.38	maritime	2024	base_without_pipeline	3.54853	0.731184	0.0288751	4.30859	514.753	truck	0.401507	7738.06	0.232142	580.565	barge	0.0975349
KGZ	CH2	truck	6031.08	land	2024	base_without_pipeline	0.263158	18.0932	1.98932	20.3457
KGZ	LH2	truck	6031.08	land	2024	base_without_pipeline	3.268	3.61865	0.906248	7.7929
KGZ	LH2	rail	6031.08	land	2024	base_without_pipeline	3.268	3.01554	0.768873	7.05241
KGZ	NH3	truck	6031.08	land	2024	base_without_pipeline	2.916	6.04917	0.0326028	8.99778
KGZ	NH3	rail	6031.08	land	2024	base_without_pipeline	2.916	0.747251	0.0276607	3.69091
KGZ	MeOH	truck	6031.08	land	2024	base_without_pipeline	3.46714	6.27232	0.00884144	9.74831
KGZ	MeOH	rail	6031.08	land	2024	base_without_pipeline	3.46714	0.771978	0.0075012	4.24662
KGZ	LOHC	truck	6031.08	land	2024	base_without_pipeline	3.54853	4.70424	0.0198932	8.27267
KGZ	LOHC	rail	6031.08	land	2024	base_without_pipeline	3.54853	0.578984	0.0168777	4.14439
KGZ	LH2	ship	11515.1	maritime	2024	base_without_pipeline	3.268	2.68327	1.59029	7.54157	3209.11	rail	1.60455	7725.39	0.759406	580.565	barge	0.319311
KGZ	NH3	ship	11515.1	maritime	2024	base_without_pipeline	2.916	0.7944	0.0572118	3.76761	3209.11	rail	0.397609	7725.39	0.273479	580.565	barge	0.123312
KGZ	MeOH	ship	11515.1	maritime	2024	base_without_pipeline	3.46714	0.849828	0.0155151	4.33249	3209.11	rail	0.410766	7725.39	0.309016	580.565	barge	0.130047
KGZ	LOHC	ship	11515.1	maritime	2024	base_without_pipeline	3.54853	0.637371	0.0349089	4.22081	3209.11	rail	0.308075	7725.39	0.231762	580.565	barge	0.0975349
KHM	LH2	ship	12909.4	maritime	2024	base_without_pipeline	3.268	1.6011	1.73322	6.60232	139.255	truck	0.083553	12189.6	1.19824	580.565	barge	0.319311
KHM	NH3	ship	12909.4	maritime	2024	base_without_pipeline	2.916	0.694497	0.0623535	3.67285	139.255	truck	0.139673	12189.6	0.431512	580.565	barge	0.123312
KHM	MeOH	ship	12909.4	maritime	2024	base_without_pipeline	3.46714	0.762456	0.0169094	4.24651	139.255	truck	0.144825	12189.6	0.487584	580.565	barge	0.130047
KHM	LOHC	ship	12909.4	maritime	2024	base_without_pipeline	3.54853	0.571842	0.0380462	4.15842	139.255	truck	0.108619	12189.6	0.365688	580.565	barge	0.0975349
KIR	LH2	ship	17660.2	maritime	2024	base_without_pipeline	3.268	1.99824	2.22017	7.4864	0	none	0	17079.6	1.67892	580.565	barge	0.319311
KIR	NH3	ship	17660.2	maritime	2024	base_without_pipeline	2.916	0.72793	0.0798719	3.7238	0	none	0	17079.6	0.604618	580.565	barge	0.123312
KIR	MeOH	ship	17660.2	maritime	2024	base_without_pipeline	3.46714	0.813231	0.0216602	4.30203	0	none	0	17079.6	0.683184	580.565	barge	0.130047
KIR	LOHC	ship	17660.2	maritime	2024	base_without_pipeline	3.54853	0.609923	0.0487354	4.20719	0	none	0	17079.6	0.512388	580.565	barge	0.0975349
KNA	LH2	ship	7359.92	maritime	2024	base_without_pipeline	3.268	0.985721	1.16439	5.41811	0	none	0	6779.35	0.66641	580.565	barge	0.319311
KNA	NH3	ship	7359.92	maritime	2024	base_without_pipeline	2.916	0.363301	0.0418897	3.32119	0	none	0	6779.35	0.239989	580.565	barge	0.123312
KNA	MeOH	ship	7359.92	maritime	2024	base_without_pipeline	3.46714	0.401221	0.0113599	3.87972	0	none	0	6779.35	0.271174	580.565	barge	0.130047
KNA	LOHC	ship	7359.92	maritime	2024	base_without_pipeline	3.54853	0.300915	0.0255598	3.875	0	none	0	6779.35	0.20338	580.565	barge	0.0975349
KOR	LH2	ship	17171.3	maritime	2024	base_without_pipeline	3.268	2.16255	2.17006	7.6006	423.305	truck	0.253983	16167.4	1.58926	580.565	barge	0.319311
KOR	NH3	ship	17171.3	maritime	2024	base_without_pipeline	2.916	1.12021	0.0780691	4.11428	423.305	truck	0.424575	16167.4	0.572326	580.565	barge	0.123312
KOR	MeOH	ship	17171.3	maritime	2024	base_without_pipeline	3.46714	1.21698	0.0211713	4.70529	423.305	truck	0.440237	16167.4	0.646696	580.565	barge	0.130047
KOR	LOHC	ship	17171.3	maritime	2024	base_without_pipeline	3.54853	0.912735	0.0476354	4.5089	423.305	truck	0.330178	16167.4	0.485022	580.565	barge	0.0975349
KWT	LH2	ship	8947.34	maritime	2024	base_without_pipeline	3.268	1.20115	1.3271	5.79625	118.367	truck	0.0710202	8248.41	0.810819	580.565	barge	0.319311
KWT	NH3	ship	8947.34	maritime	2024	base_without_pipeline	2.916	0.534028	0.0477433	3.49777	118.367	truck	0.118722	8248.41	0.291994	580.565	barge	0.123312
KWT	MeOH	ship	8947.34	maritime	2024	base_without_pipeline	3.46714	0.583085	0.0129473	4.06317	118.367	truck	0.123102	8248.41	0.329936	580.565	barge	0.130047
KWT	LOHC	ship	8947.34	maritime	2024	base_without_pipeline	3.54853	0.437313	0.0291315	4.01497	118.367	truck	0.0923263	8248.41	0.247452	580.565	barge	0.0975349
LAO	CH2	truck	14718.2	land	2024	base_without_pipeline	0.263158	44.1546	4.59546	49.0132
LAO	LH2	truck	14718.2	land	2024	base_without_pipeline	3.268	8.83092	2.09349	14.1924
LAO	LH2	rail	14718.2	land	2024	base_without_pipeline	3.268	7.3591	1.75824	12.3853
LAO	NH3	truck	14718.2	land	2024	base_without_pipeline	2.916	14.7624	0.0753145	17.7537
LAO	NH3	rail	14718.2	land	2024	base_without_pipeline	2.916	1.82358	0.0632537	4.80284
LAO	MeOH	truck	14718.2	land	2024	base_without_pipeline	3.46714	15.3069	0.0204243	18.7945
LAO	MeOH	rail	14718.2	land	2024	base_without_pipeline	3.46714	1.88393	0.0171536	5.36823
LAO	LOHC	truck	14718.2	land	2024	base_without_pipeline	3.54853	11.4802	0.0459546	15.0747
LAO	LOHC	rail	14718.2	land	2024	base_without_pipeline	3.54853	1.41295	0.0385955	5.00007
LAO	LH2	ship	13939.6	maritime	2024	base_without_pipeline	3.268	1.96811	1.83881	7.07492	668.942	truck	0.401365	12690.1	1.24744	580.565	barge	0.319311
LAO	NH3	ship	13939.6	maritime	2024	base_without_pipeline	2.916	1.24349	0.0661523	4.22564	668.942	truck	0.670949	12690.1	0.44923	580.565	barge	0.123312
LAO	MeOH	ship	13939.6	maritime	2024	base_without_pipeline	3.46714	1.33335	0.0179396	4.81843	668.942	truck	0.6957	12690.1	0.507604	580.565	barge	0.130047
LAO	LOHC	ship	13939.6	maritime	2024	base_without_pipeline	3.54853	1.00001	0.0403641	4.58891	668.942	truck	0.521775	12690.1	0.380703	580.565	barge	0.0975349
LBN	LH2	ship	3109.61	maritime	2024	base_without_pipeline	3.268	0.613419	0.728735	4.61015	90.697	truck	0.0544182	2438.35	0.23969	580.565	barge	0.319311
LBN	NH3	ship	3109.61	maritime	2024	base_without_pipeline	2.916	0.300599	0.0262167	3.24282	90.697	truck	0.0909691	2438.35	0.0863176	580.565	barge	0.123312
LBN	MeOH	ship	3109.61	maritime	2024	base_without_pipeline	3.46714	0.321905	0.00710961	3.79616	90.697	truck	0.0943249	2438.35	0.097534	580.565	barge	0.130047
LBN	LOHC	ship	3109.61	maritime	2024	base_without_pipeline	3.54853	0.241429	0.0159966	3.80596	90.697	truck	0.0707437	2438.35	0.0731505	580.565	barge	0.0975349
LBR	LH2	ship	6885.09	maritime	2024	base_without_pipeline	3.268	1.25997	1.11572	5.64369	639.673	truck	0.383804	5664.85	0.556855	580.565	barge	0.319311
LBR	NH3	ship	6885.09	maritime	2024	base_without_pipeline	2.916	0.96544	0.0401388	3.92158	639.673	truck	0.641592	5664.85	0.200536	580.565	barge	0.123312
LBR	MeOH	ship	6885.09	maritime	2024	base_without_pipeline	3.46714	1.0219	0.0108851	4.49993	639.673	truck	0.66526	5664.85	0.226594	580.565	barge	0.130047
LBR	LOHC	ship	6885.09	maritime	2024	base_without_pipeline	3.54853	0.766425	0.0244914	4.33945	639.673	truck	0.498945	5664.85	0.169945	580.565	barge	0.0975349
LBY	LH2	ship	1955.44	maritime	2024	base_without_pipeline	3.268	0.510328	0.610433	4.38876	111.355	truck	0.066813	1263.52	0.124204	580.565	barge	0.319311
LBY	NH3	ship	1955.44	maritime	2024	base_without_pipeline	2.916	0.27973	0.0219607	3.21769	111.355	truck	0.111689	1263.52	0.0447286	580.565	barge	0.123312
LBY	MeOH	ship	1955.44	maritime	2024	base_without_pipeline	3.46714	0.296397	0.00595544	3.76949	111.355	truck	0.115809	1263.52	0.0505408	580.565	barge	0.130047
LBY	LOHC	ship	1955.44	maritime	2024	base_without_pipeline	3.54853	0.222297	0.0133997	3.78423	111.355	truck	0.0868569	1263.52	0.0379056	580.565	barge	0.0975349
LCA	LH2	ship	7340.98	maritime	2024	base_without_pipeline	3.268	0.983859	1.16245	5.41431	0	none	0	6760.41	0.664548	580.565	barge	0.319311
LCA	NH3	ship	7340.98	maritime	2024	base_without_pipeline	2.916	0.362631	0.0418198	3.32045	0	none	0	6760.41	0.239319	580.565	barge	0.123312
LCA	MeOH	ship	7340.98	maritime	2024	base_without_pipeline	3.46714	0.400463	0.011341	3.87895	0	none	0	6760.41	0.270416	580.565	barge	0.130047
LCA	LOHC	ship	7340.98	maritime	2024	base_without_pipeline	3.54853	0.300347	0.0255172	3.87439	0	none	0	6760.41	0.202812	580.565	barge	0.0975349
LIE	CH2	truck	215.658	land	2024	base_without_pipeline	0.263158	0.646974	0.244697	1.15483
LIE	LH2	truck	215.658	land	2024	base_without_pipeline	3.268	0.129395	0.111473	3.50887
LIE	LH2	rail	215.658	land	2024	base_without_pipeline	3.268	0.107829	0.106561	3.48239
LIE	NH3	truck	215.658	land	2024	base_without_pipeline	2.916	0.216305	0.00401032	3.13632
LIE	NH3	rail	215.658	land	2024	base_without_pipeline	2.916	0.02672	0.0038336	2.94655
LIE	MeOH	truck	215.658	land	2024	base_without_pipeline	3.46714	0.224284	0.00108754	3.69251
LIE	MeOH	rail	215.658	land	2024	base_without_pipeline	3.46714	0.0276042	0.00103962	3.49579
LIE	LOHC	truck	215.658	land	2024	base_without_pipeline	3.54853	0.168213	0.00244697	3.71919
LIE	LOHC	rail	215.658	land	2024	base_without_pipeline	3.54853	0.0207032	0.00233914	3.57157
LKA	LH2	ship	9076.05	maritime	2024	base_without_pipeline	3.268	1.20461	1.3403	5.81291	100.054	truck	0.0600324	8395.43	0.825271	580.565	barge	0.319311
LKA	NH3	ship	9076.05	maritime	2024	base_without_pipeline	2.916	0.520864	0.0482179	3.48508	100.054	truck	0.100354	8395.43	0.297198	580.565	barge	0.123312
LKA	MeOH	ship	9076.05	maritime	2024	base_without_pipeline	3.46714	0.56992	0.013076	4.05014	100.054	truck	0.104056	8395.43	0.335817	580.565	barge	0.130047
LKA	LOHC	ship	9076.05	maritime	2024	base_without_pipeline	3.54853	0.42744	0.0294211	4.00539	100.054	truck	0.0780421	8395.43	0.251863	580.565	barge	0.0975349
LSO	CH2	truck	13571.8	land	2024	base_without_pipeline	0.263158	40.7154	4.25154	45.2301
LSO	LH2	truck	13571.8	land	2024	base_without_pipeline	3.268	8.14308	1.93681	13.3479
LSO	LH2	rail	13571.8	land	2024	base_without_pipeline	3.268	6.7859	1.62768	11.6816
LSO	NH3	truck	13571.8	land	2024	base_without_pipeline	2.916	13.6125	0.069678	16.5982
LSO	NH3	rail	13571.8	land	2024	base_without_pipeline	2.916	1.68155	0.0585567	4.6561
LSO	MeOH	truck	13571.8	land	2024	base_without_pipeline	3.46714	14.1147	0.0188957	17.6007
LSO	MeOH	rail	13571.8	land	2024	base_without_pipeline	3.46714	1.73719	0.0158798	5.22021
LSO	LOHC	truck	13571.8	land	2024	base_without_pipeline	3.54853	10.586	0.0425154	14.177
LSO	LOHC	rail	13571.8	land	2024	base_without_pipeline	3.54853	1.30289	0.0357295	4.88715
LSO	LH2	ship	12071.9	maritime	2024	base_without_pipeline	3.268	1.73936	1.64737	6.65473	578.933	truck	0.34736	10912.4	1.07269	580.565	barge	0.319311
LSO	NH3	ship	12071.9	maritime	2024	base_without_pipeline	2.916	1.09028	0.0592651	4.06555	578.933	truck	0.58067	10912.4	0.386299	580.565	barge	0.123312
LSO	MeOH	ship	12071.9	maritime	2024	base_without_pipeline	3.46714	1.16863	0.0160719	4.65185	578.933	truck	0.60209	10912.4	0.436496	580.565	barge	0.130047
LSO	LOHC	ship	12071.9	maritime	2024	base_without_pipeline	3.54853	0.876475	0.0361618	4.46117	578.933	truck	0.451568	10912.4	0.327372	580.565	barge	0.0975349
LTU	CH2	truck	1700	land	2024	base_without_pipeline	0.263158	5.1	0.69	6.05316
LTU	LH2	truck	1700	land	2024	base_without_pipeline	3.268	1.02	0.314333	4.60233
LTU	LH2	rail	1700	land	2024	base_without_pipeline	3.268	0.85	0.275611	4.39361
LTU	NH3	truck	1700	land	2024	base_without_pipeline	2.916	1.7051	0.0113083	4.63241
LTU	NH3	rail	1700	land	2024	base_without_pipeline	2.916	0.21063	0.00991528	3.13655
LTU	MeOH	truck	1700	land	2024	base_without_pipeline	3.46714	1.768	0.00306667	5.23821
LTU	MeOH	rail	1700	land	2024	base_without_pipeline	3.46714	0.2176	0.00268889	3.68743
LTU	LOHC	truck	1700	land	2024	base_without_pipeline	3.54853	1.326	0.0069	4.88143
LTU	LOHC	rail	1700	land	2024	base_without_pipeline	3.54853	0.1632	0.00605	3.71778
LTU	LH2	ship	5736.92	maritime	2024	base_without_pipeline	3.268	0.826181	0.998035	5.09222	0	none	0	5156.36	0.50687	580.565	barge	0.319311
LTU	NH3	ship	5736.92	maritime	2024	base_without_pipeline	2.916	0.305847	0.0359049	3.25775	0	none	0	5156.36	0.182535	580.565	barge	0.123312
LTU	MeOH	ship	5736.92	maritime	2024	base_without_pipeline	3.46714	0.336301	0.00973693	3.81318	0	none	0	5156.36	0.206254	580.565	barge	0.130047
LTU	LOHC	ship	5736.92	maritime	2024	base_without_pipeline	3.54853	0.252226	0.0219081	3.82266	0	none	0	5156.36	0.154691	580.565	barge	0.0975349
LUX	CH2	truck	300	land	2024	base_without_pipeline	0.263158	0.9	0.27	1.43316
LUX	LH2	truck	300	land	2024	base_without_pipeline	3.268	0.18	0.123	3.571
LUX	LH2	rail	300	land	2024	base_without_pipeline	3.268	0.15	0.116167	3.53417
LUX	NH3	truck	300	land	2024	base_without_pipeline	2.916	0.3009	0.004425	3.22133
LUX	NH3	rail	300	land	2024	base_without_pipeline	2.916	0.03717	0.00417917	2.95735
LUX	MeOH	truck	300	land	2024	base_without_pipeline	3.46714	0.312	0.0012	3.78034
LUX	MeOH	rail	300	land	2024	base_without_pipeline	3.46714	0.0384	0.00113333	3.50668
LUX	LOHC	truck	300	land	2024	base_without_pipeline	3.54853	0.234	0.0027	3.78523
LUX	LOHC	rail	300	land	2024	base_without_pipeline	3.54853	0.0288	0.00255	3.57988
LVA	CH2	truck	1830	land	2024	base_without_pipeline	0.263158	5.49	0.729	6.48216
LVA	LH2	truck	1830	land	2024	base_without_pipeline	3.268	1.098	0.3321	4.6981
LVA	LH2	rail	1830	land	2024	base_without_pipeline	3.268	0.915	0.290417	4.47342
LVA	NH3	truck	1830	land	2024	base_without_pipeline	2.916	1.83549	0.0119475	4.76344
LVA	NH3	rail	1830	land	2024	base_without_pipeline	2.916	0.226737	0.0104479	3.15318
LVA	MeOH	truck	1830	land	2024	base_without_pipeline	3.46714	1.9032	0.00324	5.37358
LVA	MeOH	rail	1830	land	2024	base_without_pipeline	3.46714	0.23424	0.00283333	3.70422
LVA	LOHC	truck	1830	land	2024	base_without_pipeline	3.54853	1.4274	0.00729	4.98322
LVA	LOHC	rail	1830	land	2024	base_without_pipeline	3.54853	0.17568	0.006375	3.73058
LVA	LH2	ship	5789.05	maritime	2024	base_without_pipeline	3.268	0.920311	1.00338	5.19169	177.409	truck	0.106445	5031.08	0.494555	580.565	barge	0.319311
LVA	NH3	ship	5789.05	maritime	2024	base_without_pipeline	2.916	0.479353	0.0360971	3.43145	177.409	truck	0.177941	5031.08	0.1781	580.565	barge	0.123312
LVA	MeOH	ship	5789.05	maritime	2024	base_without_pipeline	3.46714	0.515795	0.00978905	3.99273	177.409	truck	0.184505	5031.08	0.201243	580.565	barge	0.130047
LVA	LOHC	ship	5789.05	maritime	2024	base_without_pipeline	3.54853	0.386846	0.0220254	3.9574	177.409	truck	0.138379	5031.08	0.150932	580.565	barge	0.0975349
MAC	LH2	ship	14614.6	maritime	2024	base_without_pipeline	3.268	1.69885	1.90799	6.87485	0	none	0	14034	1.37954	580.565	barge	0.319311
MAC	NH3	ship	14614.6	maritime	2024	base_without_pipeline	2.916	0.620116	0.0686412	3.60476	0	none	0	14034	0.496804	580.565	barge	0.123312
MAC	MeOH	ship	14614.6	maritime	2024	base_without_pipeline	3.46714	0.691407	0.0186146	4.17716	0	none	0	14034	0.56136	580.565	barge	0.130047
MAC	LOHC	ship	14614.6	maritime	2024	base_without_pipeline	3.54853	0.518555	0.0418828	4.10897	0	none	0	14034	0.42102	580.565	barge	0.0975349
MAR	LH2	ship	1942.75	maritime	2024	base_without_pipeline	3.268	0.581955	0.609132	4.45909	256.612	truck	0.153967	1105.57	0.108678	580.565	barge	0.319311
MAR	NH3	ship	1942.75	maritime	2024	base_without_pipeline	2.916	0.419831	0.0219139	3.35774	256.612	truck	0.257382	1105.57	0.0391372	580.565	barge	0.123312
MAR	MeOH	ship	1942.75	maritime	2024	base_without_pipeline	3.46714	0.441146	0.00594275	3.91423	256.612	truck	0.266876	1105.57	0.0442228	580.565	barge	0.130047
MAR	LOHC	ship	1942.75	maritime	2024	base_without_pipeline	3.54853	0.330859	0.0133712	3.89276	256.612	truck	0.200157	1105.57	0.0331671	580.565	barge	0.0975349
MCO	LH2	ship	788.722	maritime	2024	base_without_pipeline	3.268	0.339773	0.490844	4.09862	0	none	0	208.157	0.0204618	580.565	barge	0.319311
MCO	NH3	ship	788.722	maritime	2024	base_without_pipeline	2.916	0.130681	0.0176584	3.06434	0	none	0	208.157	0.00736876	580.565	barge	0.123312
MCO	MeOH	ship	788.722	maritime	2024	base_without_pipeline	3.46714	0.138373	0.00478872	3.6103	0	none	0	208.157	0.00832628	580.565	barge	0.130047
MCO	LOHC	ship	788.722	maritime	2024	base_without_pipeline	3.54853	0.10378	0.0107746	3.66308	0	none	0	208.157	0.00624471	580.565	barge	0.0975349
MDA	CH2	truck	1850	land	2024	base_without_pipeline	0.263158	5.55	0.735	6.54816
MDA	LH2	truck	1850	land	2024	base_without_pipeline	3.268	1.11	0.334833	4.71283
MDA	LH2	rail	1850	land	2024	base_without_pipeline	3.268	0.925	0.292694	4.48569
MDA	NH3	truck	1850	land	2024	base_without_pipeline	2.916	1.85555	0.0120458	4.7836
MDA	NH3	rail	1850	land	2024	base_without_pipeline	2.916	0.229215	0.0105299	3.15574
MDA	MeOH	truck	1850	land	2024	base_without_pipeline	3.46714	1.924	0.00326667	5.39441
MDA	MeOH	rail	1850	land	2024	base_without_pipeline	3.46714	0.2368	0.00285556	3.7068
MDA	LOHC	truck	1850	land	2024	base_without_pipeline	3.54853	1.443	0.00735	4.99888
MDA	LOHC	rail	1850	land	2024	base_without_pipeline	3.54853	0.1776	0.006425	3.73255
MDA	LH2	ship	3938.11	maritime	2024	base_without_pipeline	3.268	0.900543	0.813657	4.9822	500.669	truck	0.300401	2856.88	0.280831	580.565	barge	0.319311
MDA	NH3	ship	3938.11	maritime	2024	base_without_pipeline	2.916	0.726617	0.0292718	3.67189	500.669	truck	0.502171	2856.88	0.101134	580.565	barge	0.123312
MDA	MeOH	ship	3938.11	maritime	2024	base_without_pipeline	3.46714	0.765018	0.00793811	4.2401	500.669	truck	0.520696	2856.88	0.114275	580.565	barge	0.130047
MDA	LOHC	ship	3938.11	maritime	2024	base_without_pipeline	3.54853	0.573763	0.0178608	4.14015	500.669	truck	0.390522	2856.88	0.0857064	580.565	barge	0.0975349
MDG	LH2	ship	9933.05	maritime	2024	base_without_pipeline	3.268	1.38062	1.42814	6.07676	282.967	truck	0.16978	9069.52	0.891534	580.565	barge	0.319311
MDG	NH3	ship	9933.05	maritime	2024	base_without_pipeline	2.916	0.728189	0.0513781	3.69557	282.967	truck	0.283816	9069.52	0.321061	580.565	barge	0.123312
MDG	MeOH	ship	9933.05	maritime	2024	base_without_pipeline	3.46714	0.787113	0.0139331	4.26819	282.967	truck	0.294286	9069.52	0.362781	580.565	barge	0.130047
MDG	LOHC	ship	9933.05	maritime	2024	base_without_pipeline	3.54853	0.590335	0.0313494	4.17021	282.967	truck	0.220714	9069.52	0.272086	580.565	barge	0.0975349
MDV	LH2	ship	8397.45	maritime	2024	base_without_pipeline	3.268	1.08771	1.27074	5.62645	0	none	0	7816.89	0.7684	580.565	barge	0.319311
MDV	NH3	ship	8397.45	maritime	2024	base_without_pipeline	2.916	0.40003	0.0457156	3.36175	0	none	0	7816.89	0.276718	580.565	barge	0.123312
MDV	MeOH	ship	8397.45	maritime	2024	base_without_pipeline	3.46714	0.442722	0.0123975	3.92226	0	none	0	7816.89	0.312676	580.565	barge	0.130047
MDV	LOHC	ship	8397.45	maritime	2024	base_without_pipeline	3.54853	0.332042	0.0278943	3.90847	0	none	0	7816.89	0.234507	580.565	barge	0.0975349
MEX	LH2	ship	12850	maritime	2024	base_without_pipeline	3.268	1.77741	1.72712	6.77253	502.323	truck	0.301394	11767.1	1.15671	580.565	barge	0.319311
MEX	NH3	ship	12850	maritime	2024	base_without_pipeline	2.916	1.0437	0.0621343	4.02183	502.323	truck	0.50383	11767.1	0.416555	580.565	barge	0.123312
MEX	MeOH	ship	12850	maritime	2024	base_without_pipeline	3.46714	1.12315	0.01685	4.60714	502.323	truck	0.522416	11767.1	0.470684	580.565	barge	0.130047
MEX	LOHC	ship	12850	maritime	2024	base_without_pipeline	3.54853	0.84236	0.0379125	4.4288	502.323	truck	0.391812	11767.1	0.353013	580.565	barge	0.0975349
MHL	LH2	ship	18793.8	maritime	2024	base_without_pipeline	3.268	2.10967	2.33636	7.71403	0	none	0	18213.2	1.79036	580.565	barge	0.319311
MHL	NH3	ship	18793.8	maritime	2024	base_without_pipeline	2.916	0.768059	0.084052	3.76811	0	none	0	18213.2	0.644747	580.565	barge	0.123312
MHL	MeOH	ship	18793.8	maritime	2024	base_without_pipeline	3.46714	0.858575	0.0227938	4.34851	0	none	0	18213.2	0.728528	580.565	barge	0.130047
MHL	LOHC	ship	18793.8	maritime	2024	base_without_pipeline	3.54853	0.643931	0.051286	4.24375	0	none	0	18213.2	0.546396	580.565	barge	0.0975349
MKD	CH2	truck	1650	land	2024	base_without_pipeline	0.263158	4.95	0.675	5.88816
MKD	LH2	truck	1650	land	2024	base_without_pipeline	3.268	0.99	0.3075	4.5655
MKD	LH2	rail	1650	land	2024	base_without_pipeline	3.268	0.825	0.269917	4.36292
MKD	NH3	truck	1650	land	2024	base_without_pipeline	2.916	1.65495	0.0110625	4.58201
MKD	NH3	rail	1650	land	2024	base_without_pipeline	2.916	0.204435	0.00971042	3.13015
MKD	MeOH	truck	1650	land	2024	base_without_pipeline	3.46714	1.716	0.003	5.18614
MKD	MeOH	rail	1650	land	2024	base_without_pipeline	3.46714	0.2112	0.00263333	3.68098
MKD	LOHC	truck	1650	land	2024	base_without_pipeline	3.54853	1.287	0.00675	4.84228
MKD	LOHC	rail	1650	land	2024	base_without_pipeline	3.54853	0.1584	0.005925	3.71285
MKD	LH2	ship	2547.1	maritime	2024	base_without_pipeline	3.268	0.677554	0.671078	4.61663	328.748	truck	0.197249	1637.79	0.160995	580.565	barge	0.319311
MKD	NH3	ship	2547.1	maritime	2024	base_without_pipeline	2.916	0.511024	0.0241424	3.45117	328.748	truck	0.329734	1637.79	0.0579778	580.565	barge	0.123312
MKD	MeOH	ship	2547.1	maritime	2024	base_without_pipeline	3.46714	0.537456	0.0065471	4.01115	328.748	truck	0.341898	1637.79	0.0655116	580.565	barge	0.130047
MKD	LOHC	ship	2547.1	maritime	2024	base_without_pipeline	3.54853	0.403092	0.014731	3.96635	328.748	truck	0.256423	1637.79	0.0491337	580.565	barge	0.0975349
MLI	CH2	truck	10903.7	land	2024	base_without_pipeline	0.263158	32.7111	3.45111	36.4254
MLI	LH2	truck	10903.7	land	2024	base_without_pipeline	3.268	6.54222	1.57217	11.3824
MLI	LH2	rail	10903.7	land	2024	base_without_pipeline	3.268	5.45185	1.32381	10.0437
MLI	NH3	truck	10903.7	land	2024	base_without_pipeline	2.916	10.9364	0.0565599	13.909
MLI	NH3	rail	10903.7	land	2024	base_without_pipeline	2.916	1.35097	0.0476249	4.31459
MLI	MeOH	truck	10903.7	land	2024	base_without_pipeline	3.46714	11.3398	0.0153383	14.8223
MLI	MeOH	rail	10903.7	land	2024	base_without_pipeline	3.46714	1.39567	0.0129152	4.87573
MLI	LOHC	truck	10903.7	land	2024	base_without_pipeline	3.54853	8.50489	0.0345111	12.0879
MLI	LOHC	rail	10903.7	land	2024	base_without_pipeline	3.54853	1.04676	0.0290592	4.62434
MLI	LH2	ship	6126.42	maritime	2024	base_without_pipeline	3.268	1.29346	1.03796	5.59941	855.068	truck	0.513041	4690.79	0.461105	580.565	barge	0.319311
MLI	NH3	ship	6126.42	maritime	2024	base_without_pipeline	2.916	1.147	0.0373412	4.10034	855.068	truck	0.857633	4690.79	0.166054	580.565	barge	0.123312
MLI	MeOH	ship	6126.42	maritime	2024	base_without_pipeline	3.46714	1.20695	0.0101264	4.68422	855.068	truck	0.889271	4690.79	0.187632	580.565	barge	0.130047
MLI	LOHC	ship	6126.42	maritime	2024	base_without_pipeline	3.54853	0.905212	0.0227845	4.47653	855.068	truck	0.666953	4690.79	0.140724	580.565	barge	0.0975349
MLT	LH2	ship	1485.66	maritime	2024	base_without_pipeline	3.268	0.408281	0.56228	4.23856	0	none	0	905.094	0.0889707	580.565	barge	0.319311
MLT	NH3	ship	1485.66	maritime	2024	base_without_pipeline	2.916	0.155352	0.0202484	3.09158	0	none	0	905.094	0.0320403	580.565	barge	0.123312
MLT	MeOH	ship	1485.66	maritime	2024	base_without_pipeline	3.46714	0.16625	0.00548566	3.63888	0	none	0	905.094	0.0362038	580.565	barge	0.130047
MLT	LOHC	ship	1485.66	maritime	2024	base_without_pipeline	3.54853	0.124688	0.0123427	3.68556	0	none	0	905.094	0.0271528	580.565	barge	0.0975349
MMR	LH2	ship	12232.1	maritime	2024	base_without_pipeline	3.268	2.01571	1.66379	6.9475	1371.81	rail	0.685905	10279.7	1.01049	580.565	barge	0.319311
MMR	NH3	ship	12232.1	maritime	2024	base_without_pipeline	2.916	0.657181	0.0598558	3.63304	1371.81	rail	0.169967	10279.7	0.363901	580.565	barge	0.123312
MMR	MeOH	ship	12232.1	maritime	2024	base_without_pipeline	3.46714	0.716826	0.0162321	4.2002	1371.81	rail	0.175592	10279.7	0.411188	580.565	barge	0.130047
MMR	LOHC	ship	12232.1	maritime	2024	base_without_pipeline	3.54853	0.53762	0.0365222	4.12267	1371.81	rail	0.131694	10279.7	0.308391	580.565	barge	0.0975349
MNE	CH2	truck	1300	land	2024	base_without_pipeline	0.263158	3.9	0.57	4.73316
MNE	LH2	truck	1300	land	2024	base_without_pipeline	3.268	0.78	0.259667	4.30767
MNE	LH2	rail	1300	land	2024	base_without_pipeline	3.268	0.65	0.230056	4.14806
MNE	NH3	truck	1300	land	2024	base_without_pipeline	2.916	1.3039	0.00934167	4.22924
MNE	NH3	rail	1300	land	2024	base_without_pipeline	2.916	0.16107	0.00827639	3.08535
MNE	MeOH	truck	1300	land	2024	base_without_pipeline	3.46714	1.352	0.00253333	4.82168
MNE	MeOH	rail	1300	land	2024	base_without_pipeline	3.46714	0.1664	0.00224444	3.63579
MNE	LOHC	truck	1300	land	2024	base_without_pipeline	3.54853	1.014	0.0057	4.56823
MNE	LOHC	rail	1300	land	2024	base_without_pipeline	3.54853	0.1248	0.00505	3.67838
MNE	LH2	ship	2272.67	maritime	2024	base_without_pipeline	3.268	0.512149	0.642949	4.4231	52.8292	truck	0.0316975	1639.28	0.161141	580.565	barge	0.319311
MNE	NH3	ship	2272.67	maritime	2024	base_without_pipeline	2.916	0.23433	0.0231305	3.17346	52.8292	truck	0.0529877	1639.28	0.0580305	580.565	barge	0.123312
MNE	MeOH	ship	2272.67	maritime	2024	base_without_pipeline	3.46714	0.25056	0.00627267	3.72398	52.8292	truck	0.0549424	1639.28	0.0655712	580.565	barge	0.130047
MNE	LOHC	ship	2272.67	maritime	2024	base_without_pipeline	3.54853	0.18792	0.0141135	3.75056	52.8292	truck	0.0412068	1639.28	0.0491784	580.565	barge	0.0975349
MNG	CH2	truck	8361.86	land	2024	base_without_pipeline	0.263158	25.0856	2.68856	28.0373
MNG	LH2	truck	8361.86	land	2024	base_without_pipeline	3.268	5.01712	1.22479	9.5099
MNG	LH2	rail	8361.86	land	2024	base_without_pipeline	3.268	4.18093	1.03432	8.48325
MNG	NH3	truck	8361.86	land	2024	base_without_pipeline	2.916	8.38695	0.0440625	11.347
MNG	NH3	rail	8361.86	land	2024	base_without_pipeline	2.916	1.03603	0.0372104	3.98924
MNG	MeOH	truck	8361.86	land	2024	base_without_pipeline	3.46714	8.69633	0.0119491	12.1754
MNG	MeOH	rail	8361.86	land	2024	base_without_pipeline	3.46714	1.07032	0.010091	4.54755
MNG	LOHC	truck	8361.86	land	2024	base_without_pipeline	3.54853	6.52225	0.0268856	10.0977
MNG	LOHC	rail	8361.86	land	2024	base_without_pipeline	3.54853	0.802739	0.0227046	4.37397
MNG	LH2	ship	18855.3	maritime	2024	base_without_pipeline	3.268	3.26033	2.34267	8.871	2849.43	rail	1.42471	15425.3	1.51631	580.565	barge	0.319311
MNG	NH3	ship	18855.3	maritime	2024	base_without_pipeline	2.916	1.02241	0.0842789	4.02269	2849.43	rail	0.353044	15425.3	0.546056	580.565	barge	0.123312
MNG	MeOH	ship	18855.3	maritime	2024	base_without_pipeline	3.46714	1.11179	0.0228553	4.60178	2849.43	rail	0.364727	15425.3	0.617012	580.565	barge	0.130047
MNG	LOHC	ship	18855.3	maritime	2024	base_without_pipeline	3.54853	0.833839	0.0514244	4.43379	2849.43	rail	0.273545	15425.3	0.462759	580.565	barge	0.0975349
MNP	LH2	ship	16483.5	maritime	2024	base_without_pipeline	3.268	1.88257	2.09956	7.25012	0	none	0	15902.9	1.56326	580.565	barge	0.319311
MNP	NH3	ship	16483.5	maritime	2024	base_without_pipeline	2.916	0.686275	0.0755328	3.67781	0	none	0	15902.9	0.562963	580.565	barge	0.123312
MNP	MeOH	ship	16483.5	maritime	2024	base_without_pipeline	3.46714	0.766163	0.0204835	4.25379	0	none	0	15902.9	0.636116	580.565	barge	0.130047
MNP	LOHC	ship	16483.5	maritime	2024	base_without_pipeline	3.54853	0.574622	0.0460878	4.16924	0	none	0	15902.9	0.477087	580.565	barge	0.0975349
MOZ	LH2	ship	11240	maritime	2024	base_without_pipeline	3.268	1.41735	1.5621	6.24745	100.083	truck	0.0600498	10559.4	1.03799	580.565	barge	0.319311
MOZ	NH3	ship	11240	maritime	2024	base_without_pipeline	2.916	0.597498	0.0561977	3.5697	100.083	truck	0.100383	10559.4	0.373803	580.565	barge	0.123312
MOZ	MeOH	ship	11240	maritime	2024	base_without_pipeline	3.46714	0.656509	0.01524	4.13889	100.083	truck	0.104086	10559.4	0.422376	580.565	barge	0.130047
MOZ	LOHC	ship	11240	maritime	2024	base_without_pipeline	3.54853	0.492382	0.0342901	4.0752	100.083	truck	0.0780647	10559.4	0.316782	580.565	barge	0.0975349
MRT	LH2	ship	4166.47	maritime	2024	base_without_pipeline	3.268	0.92412	0.837063	5.02918	502.921	truck	0.301753	3082.98	0.303057	580.565	barge	0.319311
MRT	NH3	ship	4166.47	maritime	2024	base_without_pipeline	2.916	0.736879	0.0301138	3.68299	502.921	truck	0.50443	3082.98	0.109137	580.565	barge	0.123312
MRT	MeOH	ship	4166.47	maritime	2024	base_without_pipeline	3.46714	0.776404	0.00816647	4.25171	502.921	truck	0.523038	3082.98	0.123319	580.565	barge	0.130047
MRT	LOHC	ship	4166.47	maritime	2024	base_without_pipeline	3.54853	0.582303	0.0183745	4.14921	502.921	truck	0.392278	3082.98	0.0924894	580.565	barge	0.0975349
MSR	LH2	ship	7325.5	maritime	2024	base_without_pipeline	3.268	0.982338	1.16086	5.4112	0	none	0	6744.94	0.663028	580.565	barge	0.319311
MSR	NH3	ship	7325.5	maritime	2024	base_without_pipeline	2.916	0.362083	0.0417628	3.31985	0	none	0	6744.94	0.238771	580.565	barge	0.123312
MSR	MeOH	ship	7325.5	maritime	2024	base_without_pipeline	3.46714	0.399844	0.0113255	3.87831	0	none	0	6744.94	0.269798	580.565	barge	0.130047
MSR	LOHC	ship	7325.5	maritime	2024	base_without_pipeline	3.54853	0.299883	0.0254824	3.87389	0	none	0	6744.94	0.202348	580.565	barge	0.0975349
MTQ	LH2	ship	7328.31	maritime	2024	base_without_pipeline	3.268	0.982614	1.16115	5.41176	0	none	0	6747.74	0.663303	580.565	barge	0.319311
MTQ	NH3	ship	7328.31	maritime	2024	base_without_pipeline	2.916	0.362182	0.0417731	3.31996	0	none	0	6747.74	0.23887	580.565	barge	0.123312
MTQ	MeOH	ship	7328.31	maritime	2024	base_without_pipeline	3.46714	0.399956	0.0113283	3.87843	0	none	0	6747.74	0.26991	580.565	barge	0.130047
MTQ	LOHC	ship	7328.31	maritime	2024	base_without_pipeline	3.54853	0.299967	0.0254887	3.87399	0	none	0	6747.74	0.202432	580.565	barge	0.0975349
MUS	LH2	ship	10138.3	maritime	2024	base_without_pipeline	3.268	1.25884	1.44918	5.97602	0	none	0	9557.77	0.939529	580.565	barge	0.319311
MUS	NH3	ship	10138.3	maritime	2024	base_without_pipeline	2.916	0.461657	0.0521351	3.42979	0	none	0	9557.77	0.338345	580.565	barge	0.123312
MUS	MeOH	ship	10138.3	maritime	2024	base_without_pipeline	3.46714	0.512357	0.0141383	3.99364	0	none	0	9557.77	0.382311	580.565	barge	0.130047
MUS	LOHC	ship	10138.3	maritime	2024	base_without_pipeline	3.54853	0.384268	0.0318113	3.96461	0	none	0	9557.77	0.286733	580.565	barge	0.0975349
MWI	CH2	truck	11336.1	land	2024	base_without_pipeline	0.263158	34.0083	3.58083	37.8523
MWI	LH2	truck	11336.1	land	2024	base_without_pipeline	3.268	6.80166	1.63127	11.7009
MWI	LH2	rail	11336.1	land	2024	base_without_pipeline	3.268	5.66805	1.37306	10.3091
MWI	NH3	truck	11336.1	land	2024	base_without_pipeline	2.916	11.3701	0.0586858	14.3448
MWI	NH3	rail	11336.1	land	2024	base_without_pipeline	2.916	1.40454	0.0493965	4.36994
MWI	MeOH	truck	11336.1	land	2024	base_without_pipeline	3.46714	11.7895	0.0159148	15.2726
MWI	MeOH	rail	11336.1	land	2024	base_without_pipeline	3.46714	1.45102	0.0133957	4.93156
MWI	LOHC	truck	11336.1	land	2024	base_without_pipeline	3.54853	8.84216	0.0358083	12.4265
MWI	LOHC	rail	11336.1	land	2024	base_without_pipeline	3.54853	1.08827	0.0301403	4.66694
MWI	LH2	ship	10306.7	maritime	2024	base_without_pipeline	3.268	1.95025	1.46644	6.68469	1680	rail	0.84	8046.18	0.790939	580.565	barge	0.319311
MWI	NH3	ship	10306.7	maritime	2024	base_without_pipeline	2.916	0.616299	0.0527561	3.58505	1680	rail	0.208152	8046.18	0.284835	580.565	barge	0.123312
MWI	MeOH	ship	10306.7	maritime	2024	base_without_pipeline	3.46714	0.666934	0.0143067	4.14838	1680	rail	0.21504	8046.18	0.321847	580.565	barge	0.130047
MWI	LOHC	ship	10306.7	maritime	2024	base_without_pipeline	3.54853	0.5002	0.0321902	4.08092	1680	rail	0.16128	8046.18	0.241385	580.565	barge	0.0975349
MYS	LH2	ship	11302.7	maritime	2024	base_without_pipeline	3.268	1.40596	1.56852	6.24249	65.1127	truck	0.0390676	10657	1.04758	580.565	barge	0.319311
MYS	NH3	ship	11302.7	maritime	2024	base_without_pipeline	2.916	0.565878	0.0564286	3.53831	65.1127	truck	0.065308	10657	0.377258	580.565	barge	0.123312
MYS	MeOH	ship	11302.7	maritime	2024	base_without_pipeline	3.46714	0.624044	0.0153027	4.10649	65.1127	truck	0.0677172	10657	0.42628	580.565	barge	0.130047
MYS	LOHC	ship	11302.7	maritime	2024	base_without_pipeline	3.54853	0.468033	0.034431	4.05099	65.1127	truck	0.0507879	10657	0.31971	580.565	barge	0.0975349
MYT	LH2	ship	9172.33	maritime	2024	base_without_pipeline	3.268	1.16388	1.35016	5.78204	0	none	0	8591.76	0.84457	580.565	barge	0.319311
MYT	NH3	ship	9172.33	maritime	2024	base_without_pipeline	2.916	0.42746	0.0485729	3.39203	0	none	0	8591.76	0.304148	580.565	barge	0.123312
MYT	MeOH	ship	9172.33	maritime	2024	base_without_pipeline	3.46714	0.473717	0.0131723	3.95403	0	none	0	8591.76	0.34367	580.565	barge	0.130047
MYT	LOHC	ship	9172.33	maritime	2024	base_without_pipeline	3.54853	0.355288	0.0296377	3.93345	0	none	0	8591.76	0.257753	580.565	barge	0.0975349
NAM	LH2	ship	10550.5	maritime	2024	base_without_pipeline	3.268	1.46687	1.49143	6.22629	333.884	truck	0.20033	9636.06	0.947225	580.565	barge	0.319311
NAM	NH3	ship	10550.5	maritime	2024	base_without_pipeline	2.916	0.799314	0.053655	3.76897	333.884	truck	0.334886	9636.06	0.341117	580.565	barge	0.123312
NAM	MeOH	ship	10550.5	maritime	2024	base_without_pipeline	3.46714	0.862728	0.0145505	4.34442	333.884	truck	0.347239	9636.06	0.385442	580.565	barge	0.130047
NAM	LOHC	ship	10550.5	maritime	2024	base_without_pipeline	3.54853	0.647046	0.0327386	4.22831	333.884	truck	0.26043	9636.06	0.289082	580.565	barge	0.0975349
NCL	LH2	ship	19038.3	maritime	2024	base_without_pipeline	3.268	2.20476	2.36142	7.83418	141.624	truck	0.0849744	18316.1	1.80047	580.565	barge	0.319311
NCL	NH3	ship	19038.3	maritime	2024	base_without_pipeline	2.916	0.913751	0.0849537	3.9147	141.624	truck	0.142049	18316.1	0.64839	580.565	barge	0.123312
NCL	MeOH	ship	19038.3	maritime	2024	base_without_pipeline	3.46714	1.00998	0.0230383	4.50016	141.624	truck	0.147289	18316.1	0.732644	580.565	barge	0.130047
NCL	LOHC	ship	19038.3	maritime	2024	base_without_pipeline	3.54853	0.757485	0.0518362	4.35785	141.624	truck	0.110467	18316.1	0.549483	580.565	barge	0.0975349
NER	CH2	truck	9565.89	land	2024	base_without_pipeline	0.263158	28.6977	3.04977	32.0106
NER	LH2	truck	9565.89	land	2024	base_without_pipeline	3.268	5.73953	1.38934	10.3969
NER	LH2	rail	9565.89	land	2024	base_without_pipeline	3.268	4.78294	1.17145	9.22239
NER	NH3	truck	9565.89	land	2024	base_without_pipeline	2.916	9.59459	0.0499823	12.5606
NER	NH3	rail	9565.89	land	2024	base_without_pipeline	2.916	1.18521	0.0421436	4.14336
NER	MeOH	truck	9565.89	land	2024	base_without_pipeline	3.46714	9.94853	0.0135545	13.4292
NER	MeOH	rail	9565.89	land	2024	base_without_pipeline	3.46714	1.22443	0.0114288	4.70301
NER	LOHC	truck	9565.89	land	2024	base_without_pipeline	3.54853	7.46139	0.0304977	11.0404
NER	LOHC	rail	9565.89	land	2024	base_without_pipeline	3.54853	0.918325	0.0257147	4.49257
NER	LH2	ship	8328.78	maritime	2024	base_without_pipeline	3.268	1.4892	1.2637	6.0209	1016.28	rail	0.50814	6731.94	0.66175	580.565	barge	0.319311
NER	NH3	ship	8328.78	maritime	2024	base_without_pipeline	2.916	0.48754	0.0454624	3.449	1016.28	rail	0.125917	6731.94	0.238311	580.565	barge	0.123312
NER	MeOH	ship	8328.78	maritime	2024	base_without_pipeline	3.46714	0.529408	0.0123288	4.00888	1016.28	rail	0.130084	6731.94	0.269278	580.565	barge	0.130047
NER	LOHC	ship	8328.78	maritime	2024	base_without_pipeline	3.54853	0.397056	0.0277398	3.97333	1016.28	rail	0.0975629	6731.94	0.201958	580.565	barge	0.0975349
NFK	LH2	ship	19381.5	maritime	2024	base_without_pipeline	3.268	2.16744	2.3966	7.83204	0	none	0	18800.9	1.84813	580.565	barge	0.319311
NFK	NH3	ship	19381.5	maritime	2024	base_without_pipeline	2.916	0.788864	0.0862192	3.79108	0	none	0	18800.9	0.665552	580.565	barge	0.123312
NFK	MeOH	ship	19381.5	maritime	2024	base_without_pipeline	3.46714	0.882083	0.0233815	4.37261	0	none	0	18800.9	0.752036	580.565	barge	0.130047
NFK	LOHC	ship	19381.5	maritime	2024	base_without_pipeline	3.54853	0.661562	0.0526083	4.2627	0	none	0	18800.9	0.564027	580.565	barge	0.0975349
NGA	LH2	ship	8112.03	maritime	2024	base_without_pipeline	3.268	1.39422	1.24148	5.9037	666.865	truck	0.400119	6864.6	0.67479	580.565	barge	0.319311
NGA	NH3	ship	8112.03	maritime	2024	base_without_pipeline	2.916	1.03518	0.0446631	3.99585	666.865	truck	0.668866	6864.6	0.243007	580.565	barge	0.123312
NGA	MeOH	ship	8112.03	maritime	2024	base_without_pipeline	3.46714	1.09817	0.012112	4.57743	666.865	truck	0.69354	6864.6	0.274584	580.565	barge	0.130047
NGA	LOHC	ship	8112.03	maritime	2024	base_without_pipeline	3.54853	0.823628	0.0272521	4.39941	666.865	truck	0.520155	6864.6	0.205938	580.565	barge	0.0975349
NIC	LH2	ship	9999.01	maritime	2024	base_without_pipeline	3.268	1.48911	1.4349	6.19201	486.279	truck	0.291767	8932.17	0.878032	580.565	barge	0.319311
NIC	NH3	ship	9999.01	maritime	2024	base_without_pipeline	2.916	0.927249	0.0516214	3.89487	486.279	truck	0.487738	8932.17	0.316199	580.565	barge	0.123312
NIC	MeOH	ship	9999.01	maritime	2024	base_without_pipeline	3.46714	0.993064	0.013999	4.47421	486.279	truck	0.50573	8932.17	0.357287	580.565	barge	0.130047
NIC	LOHC	ship	9999.01	maritime	2024	base_without_pipeline	3.54853	0.744798	0.0314978	4.32482	486.279	truck	0.379298	8932.17	0.267965	580.565	barge	0.0975349
NIU	LH2	ship	19692.3	maritime	2024	base_without_pipeline	3.268	2.19799	2.42846	7.89445	0	none	0	19111.7	1.87868	580.565	barge	0.319311
NIU	NH3	ship	19692.3	maritime	2024	base_without_pipeline	2.916	0.799866	0.0873652	3.80323	0	none	0	19111.7	0.676554	580.565	barge	0.123312
NIU	MeOH	ship	19692.3	maritime	2024	base_without_pipeline	3.46714	0.894515	0.0236923	4.38535	0	none	0	19111.7	0.764468	580.565	barge	0.130047
NIU	LOHC	ship	19692.3	maritime	2024	base_without_pipeline	3.54853	0.670886	0.0533076	4.27272	0	none	0	19111.7	0.573351	580.565	barge	0.0975349
NLD	CH2	truck	735	land	2024	base_without_pipeline	0.263158	2.205	0.4005	2.86866
NLD	LH2	truck	735	land	2024	base_without_pipeline	3.268	0.441	0.18245	3.89145
NLD	LH2	rail	735	land	2024	base_without_pipeline	3.268	0.3675	0.165708	3.80121
NLD	LH2	barge	735	land	2024	base_without_pipeline	3.268	0.40425	0.371563	4.04381
NLD	NH3	truck	735	land	2024	base_without_pipeline	2.916	0.737205	0.00656375	3.65977
NLD	NH3	rail	735	land	2024	base_without_pipeline	2.916	0.0910665	0.00596146	3.01303
NLD	NH3	barge	735	land	2024	base_without_pipeline	2.916	0.156114	0.0133672	3.08548
NLD	MeOH	truck	735	land	2024	base_without_pipeline	3.46714	0.7644	0.00178	4.23332
NLD	MeOH	rail	735	land	2024	base_without_pipeline	3.46714	0.09408	0.00161667	3.56284
NLD	MeOH	barge	735	land	2024	base_without_pipeline	3.46714	0.16464	0.003625	3.63541
NLD	LOHC	truck	735	land	2024	base_without_pipeline	3.54853	0.5733	0.004005	4.12583
NLD	LOHC	rail	735	land	2024	base_without_pipeline	3.54853	0.07056	0.0036375	3.62273
NLD	LOHC	barge	735	land	2024	base_without_pipeline	3.54853	0.12348	0.00815625	3.68017
NLD	LH2	ship	4204.08	maritime	2024	base_without_pipeline	3.268	0.759492	0.840919	4.86841	167.409	truck	0.100445	3456.11	0.339736	580.565	barge	0.319311
NLD	NH3	ship	4204.08	maritime	2024	base_without_pipeline	2.916	0.41357	0.0302526	3.35982	167.409	truck	0.167911	3456.11	0.122346	580.565	barge	0.123312
NLD	MeOH	ship	4204.08	maritime	2024	base_without_pipeline	3.46714	0.442396	0.00820408	3.91774	167.409	truck	0.174105	3456.11	0.138244	580.565	barge	0.130047
NLD	LOHC	ship	4204.08	maritime	2024	base_without_pipeline	3.54853	0.331797	0.0184592	3.89879	167.409	truck	0.130579	3456.11	0.103683	580.565	barge	0.0975349
NOR	CH2	truck	1600	land	2024	base_without_pipeline	0.263158	4.8	0.66	5.72316
NOR	LH2	truck	1600	land	2024	base_without_pipeline	3.268	0.96	0.300667	4.52867
NOR	LH2	rail	1600	land	2024	base_without_pipeline	3.268	0.8	0.264222	4.33222
NOR	NH3	truck	1600	land	2024	base_without_pipeline	2.916	1.6048	0.0108167	4.53162
NOR	NH3	rail	1600	land	2024	base_without_pipeline	2.916	0.19824	0.00950556	3.12375
NOR	MeOH	truck	1600	land	2024	base_without_pipeline	3.46714	1.664	0.00293333	5.13408
NOR	MeOH	rail	1600	land	2024	base_without_pipeline	3.46714	0.2048	0.00257778	3.67452
NOR	LOHC	truck	1600	land	2024	base_without_pipeline	3.54853	1.248	0.0066	4.80313
NOR	LOHC	rail	1600	land	2024	base_without_pipeline	3.54853	0.1536	0.0058	3.70793
NOR	LH2	ship	4855.39	maritime	2024	base_without_pipeline	3.268	0.766395	0.907678	4.94207	53.5563	truck	0.0321338	4221.27	0.414951	580.565	barge	0.319311
NOR	NH3	ship	4855.39	maritime	2024	base_without_pipeline	2.916	0.326462	0.0326543	3.27512	53.5563	truck	0.053717	4221.27	0.149433	580.565	barge	0.123312
NOR	MeOH	ship	4855.39	maritime	2024	base_without_pipeline	3.46714	0.354596	0.00885539	3.83059	53.5563	truck	0.0556986	4221.27	0.168851	580.565	barge	0.130047
NOR	LOHC	ship	4855.39	maritime	2024	base_without_pipeline	3.54853	0.265947	0.0199246	3.8344	53.5563	truck	0.0417739	4221.27	0.126638	580.565	barge	0.0975349
NPL	CH2	truck	11257.9	land	2024	base_without_pipeline	0.263158	33.7737	3.55737	37.5942
NPL	LH2	truck	11257.9	land	2024	base_without_pipeline	3.268	6.75474	1.62058	11.6433
NPL	LH2	rail	11257.9	land	2024	base_without_pipeline	3.268	5.62895	1.36415	10.2611
NPL	NH3	truck	11257.9	land	2024	base_without_pipeline	2.916	11.2917	0.0583013	14.266
NPL	NH3	rail	11257.9	land	2024	base_without_pipeline	2.916	1.39485	0.0490761	4.35993
NPL	MeOH	truck	11257.9	land	2024	base_without_pipeline	3.46714	11.7082	0.0158105	15.1912
NPL	MeOH	rail	11257.9	land	2024	base_without_pipeline	3.46714	1.44101	0.0133088	4.92146
NPL	LOHC	truck	11257.9	land	2024	base_without_pipeline	3.54853	8.78116	0.0355737	12.3653
NPL	LOHC	rail	11257.9	land	2024	base_without_pipeline	3.54853	1.08076	0.0299447	4.65923
NPL	LH2	ship	12853.1	maritime	2024	base_without_pipeline	3.268	2.19324	1.72745	7.18868	1661.77	rail	0.830885	10610.8	1.04304	580.565	barge	0.319311
NPL	NH3	ship	12853.1	maritime	2024	base_without_pipeline	2.916	0.704828	0.0621459	3.68297	1661.77	rail	0.205893	10610.8	0.375622	580.565	barge	0.123312
NPL	MeOH	ship	12853.1	maritime	2024	base_without_pipeline	3.46714	0.767185	0.0168531	4.25118	1661.77	rail	0.212707	10610.8	0.424432	580.565	barge	0.130047
NPL	LOHC	ship	12853.1	maritime	2024	base_without_pipeline	3.54853	0.575389	0.0379196	4.16184	1661.77	rail	0.15953	10610.8	0.318324	580.565	barge	0.0975349
NRU	LH2	ship	18580.1	maritime	2024	base_without_pipeline	3.268	2.08866	2.31446	7.67112	0	none	0	17999.5	1.76935	580.565	barge	0.319311
NRU	NH3	ship	18580.1	maritime	2024	base_without_pipeline	2.916	0.760494	0.083264	3.75976	0	none	0	17999.5	0.637182	580.565	barge	0.123312
NRU	MeOH	ship	18580.1	maritime	2024	base_without_pipeline	3.46714	0.850027	0.0225801	4.33975	0	none	0	17999.5	0.71998	580.565	barge	0.130047
NRU	LOHC	ship	18580.1	maritime	2024	base_without_pipeline	3.54853	0.63752	0.0508051	4.23685	0	none	0	17999.5	0.539985	580.565	barge	0.0975349
NZL	LH2	ship	20996.3	maritime	2024	base_without_pipeline	3.268	2.62579	2.56213	8.45592	597.184	truck	0.35831	19818.6	1.94817	580.565	barge	0.319311
NZL	NH3	ship	20996.3	maritime	2024	base_without_pipeline	2.916	1.42387	0.092174	4.43204	597.184	truck	0.598976	19818.6	0.701578	580.565	barge	0.123312
NZL	MeOH	ship	20996.3	maritime	2024	base_without_pipeline	3.46714	1.54386	0.0249963	5.036	597.184	truck	0.621071	19818.6	0.792744	580.565	barge	0.130047
NZL	LOHC	ship	20996.3	maritime	2024	base_without_pipeline	3.54853	1.1579	0.0562418	4.76267	597.184	truck	0.465804	19818.6	0.594558	580.565	barge	0.0975349
OMN	LH2	ship	7490.22	maritime	2024	base_without_pipeline	3.268	1.42157	1.17775	5.86731	1053.12	rail	0.52656	5856.53	0.575697	580.565	barge	0.319311
OMN	NH3	ship	7490.22	maritime	2024	base_without_pipeline	2.916	0.461115	0.0423702	3.41948	1053.12	rail	0.130482	5856.53	0.207321	580.565	barge	0.123312
OMN	MeOH	ship	7490.22	maritime	2024	base_without_pipeline	3.46714	0.499107	0.0114902	3.97774	1053.12	rail	0.134799	5856.53	0.234261	580.565	barge	0.130047
OMN	LOHC	ship	7490.22	maritime	2024	base_without_pipeline	3.54853	0.37433	0.025853	3.94871	1053.12	rail	0.1011	5856.53	0.175696	580.565	barge	0.0975349
PAK	LH2	ship	9754.89	maritime	2024	base_without_pipeline	3.268	1.80321	1.40988	6.48108	1448.99	rail	0.724495	7725.33	0.7594	580.565	barge	0.319311
PAK	NH3	ship	9754.89	maritime	2024	base_without_pipeline	2.916	0.576319	0.0507211	3.54304	1448.99	rail	0.17953	7725.33	0.273477	580.565	barge	0.123312
PAK	MeOH	ship	9754.89	maritime	2024	base_without_pipeline	3.46714	0.62453	0.0137549	4.10543	1448.99	rail	0.185471	7725.33	0.309013	580.565	barge	0.130047
PAK	LOHC	ship	9754.89	maritime	2024	base_without_pipeline	3.54853	0.468398	0.0309485	4.04788	1448.99	rail	0.139103	7725.33	0.23176	580.565	barge	0.0975349
PAN	LH2	ship	9461.74	maritime	2024	base_without_pipeline	3.268	1.2206	1.37983	5.86843	56.3553	truck	0.0338132	8824.82	0.86748	580.565	barge	0.319311
PAN	NH3	ship	9461.74	maritime	2024	base_without_pipeline	2.916	0.492235	0.0496402	3.45788	56.3553	truck	0.0565244	8824.82	0.312399	580.565	barge	0.123312
PAN	MeOH	ship	9461.74	maritime	2024	base_without_pipeline	3.46714	0.541649	0.0134617	4.02225	56.3553	truck	0.0586095	8824.82	0.352993	580.565	barge	0.130047
PAN	LOHC	ship	9461.74	maritime	2024	base_without_pipeline	3.54853	0.406237	0.0302889	3.98505	56.3553	truck	0.0439571	8824.82	0.264745	580.565	barge	0.0975349
PER	LH2	ship	12290.3	maritime	2024	base_without_pipeline	3.268	1.95925	1.66976	6.89701	974.436	truck	0.584662	10735.3	1.05528	580.565	barge	0.319311
PER	NH3	ship	12290.3	maritime	2024	base_without_pipeline	2.916	1.4807	0.0600705	4.45677	974.436	truck	0.977359	10735.3	0.38003	580.565	barge	0.123312
PER	MeOH	ship	12290.3	maritime	2024	base_without_pipeline	3.46714	1.57287	0.0162903	5.05631	974.436	truck	1.01341	10735.3	0.429412	580.565	barge	0.130047
PER	LOHC	ship	12290.3	maritime	2024	base_without_pipeline	3.54853	1.17965	0.0366532	4.76484	974.436	truck	0.76006	10735.3	0.322059	580.565	barge	0.0975349
PHL	LH2	ship	14422.6	maritime	2024	base_without_pipeline	3.268	1.79559	1.88832	6.9519	230.425	truck	0.138255	13611.6	1.33802	580.565	barge	0.319311
PHL	NH3	ship	14422.6	maritime	2024	base_without_pipeline	2.916	0.836279	0.0679333	3.82021	230.425	truck	0.231116	13611.6	0.481851	580.565	barge	0.123312
PHL	MeOH	ship	14422.6	maritime	2024	base_without_pipeline	3.46714	0.914153	0.0184226	4.39972	230.425	truck	0.239642	13611.6	0.544464	580.565	barge	0.130047
PHL	LOHC	ship	14422.6	maritime	2024	base_without_pipeline	3.54853	0.685614	0.0414508	4.27559	230.425	truck	0.179731	13611.6	0.408348	580.565	barge	0.0975349
PLW	LH2	ship	15158.5	maritime	2024	base_without_pipeline	3.268	1.75232	1.96374	6.98406	0	none	0	14577.9	1.43301	580.565	barge	0.319311
PLW	NH3	ship	15158.5	maritime	2024	base_without_pipeline	2.916	0.63937	0.0706468	3.62602	0	none	0	14577.9	0.516058	580.565	barge	0.123312
PLW	MeOH	ship	15158.5	maritime	2024	base_without_pipeline	3.46714	0.713163	0.0191585	4.19946	0	none	0	14577.9	0.583116	580.565	barge	0.130047
PLW	LOHC	ship	15158.5	maritime	2024	base_without_pipeline	3.54853	0.534872	0.0431065	4.12651	0	none	0	14577.9	0.437337	580.565	barge	0.0975349
PNG	LH2	ship	16460.8	maritime	2024	base_without_pipeline	3.268	1.88033	2.09723	7.24556	0	none	0	15880.2	1.56102	580.565	barge	0.319311
PNG	NH3	ship	16460.8	maritime	2024	base_without_pipeline	2.916	0.685471	0.0754491	3.67692	0	none	0	15880.2	0.562159	580.565	barge	0.123312
PNG	MeOH	ship	16460.8	maritime	2024	base_without_pipeline	3.46714	0.765255	0.0204608	4.25286	0	none	0	15880.2	0.635208	580.565	barge	0.130047
PNG	LOHC	ship	16460.8	maritime	2024	base_without_pipeline	3.54853	0.573941	0.0460367	4.16851	0	none	0	15880.2	0.476406	580.565	barge	0.0975349
POL	CH2	truck	1350	land	2024	base_without_pipeline	0.263158	4.05	0.585	4.89816
POL	LH2	truck	1350	land	2024	base_without_pipeline	3.268	0.81	0.2665	4.3445
POL	LH2	rail	1350	land	2024	base_without_pipeline	3.268	0.675	0.23575	4.17875
POL	LH2	barge	1350	land	2024	base_without_pipeline	3.268	0.7425	0.476625	4.48713
POL	NH3	truck	1350	land	2024	base_without_pipeline	2.916	1.35405	0.0095875	4.27964
POL	NH3	rail	1350	land	2024	base_without_pipeline	2.916	0.167265	0.00848125	3.09175
POL	NH3	barge	1350	land	2024	base_without_pipeline	2.916	0.28674	0.0171469	3.21989
POL	MeOH	truck	1350	land	2024	base_without_pipeline	3.46714	1.404	0.0026	4.87374
POL	MeOH	rail	1350	land	2024	base_without_pipeline	3.46714	0.1728	0.0023	3.64224
POL	MeOH	barge	1350	land	2024	base_without_pipeline	3.46714	0.3024	0.00465	3.77419
POL	LOHC	truck	1350	land	2024	base_without_pipeline	3.54853	1.053	0.00585	4.60738
POL	LOHC	rail	1350	land	2024	base_without_pipeline	3.54853	0.1296	0.005175	3.6833
POL	LOHC	barge	1350	land	2024	base_without_pipeline	3.54853	0.2268	0.0104625	3.78579
POL	LH2	ship	6040.55	maritime	2024	base_without_pipeline	3.268	1.07996	1.02916	5.37712	446.346	truck	0.267808	5013.64	0.492841	580.565	barge	0.319311
POL	NH3	ship	6040.55	maritime	2024	base_without_pipeline	2.916	0.74848	0.0370245	3.7015	446.346	truck	0.447685	5013.64	0.177483	580.565	barge	0.123312
POL	MeOH	ship	6040.55	maritime	2024	base_without_pipeline	3.46714	0.794792	0.0100406	4.27198	446.346	truck	0.4642	5013.64	0.200546	580.565	barge	0.130047
POL	LOHC	ship	6040.55	maritime	2024	base_without_pipeline	3.54853	0.596094	0.0225912	4.16721	446.346	truck	0.34815	5013.64	0.150409	580.565	barge	0.0975349
PRI	LH2	ship	7540.26	maritime	2024	base_without_pipeline	3.268	1.00345	1.18288	5.45433	0	none	0	6959.7	0.684139	580.565	barge	0.319311
PRI	NH3	ship	7540.26	maritime	2024	base_without_pipeline	2.916	0.369685	0.0425547	3.32824	0	none	0	6959.7	0.246373	580.565	barge	0.123312
PRI	MeOH	ship	7540.26	maritime	2024	base_without_pipeline	3.46714	0.408435	0.0115403	3.88712	0	none	0	6959.7	0.278388	580.565	barge	0.130047
PRI	LOHC	ship	7540.26	maritime	2024	base_without_pipeline	3.54853	0.306326	0.0259656	3.88082	0	none	0	6959.7	0.208791	580.565	barge	0.0975349
PRK	LH2	ship	17971.3	maritime	2024	base_without_pipeline	3.268	2.294	2.25206	7.81406	528.553	truck	0.317132	16862.2	1.65755	580.565	barge	0.319311
PRK	NH3	ship	17971.3	maritime	2024	base_without_pipeline	2.916	1.25037	0.0810192	4.24739	528.553	truck	0.530139	16862.2	0.596922	580.565	barge	0.123312
PRK	MeOH	ship	17971.3	maritime	2024	base_without_pipeline	3.46714	1.35423	0.0219713	4.84334	528.553	truck	0.549695	16862.2	0.674488	580.565	barge	0.130047
PRK	LOHC	ship	17971.3	maritime	2024	base_without_pipeline	3.54853	1.01567	0.0494355	4.61364	528.553	truck	0.412271	16862.2	0.505866	580.565	barge	0.0975349
PRT	CH2	truck	1850	land	2024	base_without_pipeline	0.263158	5.55	0.735	6.54816
PRT	LH2	truck	1850	land	2024	base_without_pipeline	3.268	1.11	0.334833	4.71283
PRT	LH2	rail	1850	land	2024	base_without_pipeline	3.268	0.925	0.292694	4.48569
PRT	NH3	truck	1850	land	2024	base_without_pipeline	2.916	1.85555	0.0120458	4.7836
PRT	NH3	rail	1850	land	2024	base_without_pipeline	2.916	0.229215	0.0105299	3.15574
PRT	MeOH	truck	1850	land	2024	base_without_pipeline	3.46714	1.924	0.00326667	5.39441
PRT	MeOH	rail	1850	land	2024	base_without_pipeline	3.46714	0.2368	0.00285556	3.7068
PRT	LOHC	truck	1850	land	2024	base_without_pipeline	3.54853	1.443	0.00735	4.99888
PRT	LOHC	rail	1850	land	2024	base_without_pipeline	3.54853	0.1776	0.006425	3.73255
PRT	LH2	ship	2313.24	maritime	2024	base_without_pipeline	3.268	0.490844	0.647107	4.40595	2.41421	truck	0.00144853	1730.26	0.170085	580.565	barge	0.319311
PRT	NH3	ship	2313.24	maritime	2024	base_without_pipeline	2.916	0.186985	0.0232801	3.12626	2.41421	truck	0.00242145	1730.26	0.0612512	580.565	barge	0.123312
PRT	MeOH	ship	2313.24	maritime	2024	base_without_pipeline	3.46714	0.201768	0.00631324	3.67522	2.41421	truck	0.00251078	1730.26	0.0692104	580.565	barge	0.130047
PRT	LOHC	ship	2313.24	maritime	2024	base_without_pipeline	3.54853	0.151326	0.0142048	3.71406	2.41421	truck	0.00188308	1730.26	0.0519078	580.565	barge	0.0975349
PRY	LH2	ship	13708.5	maritime	2024	base_without_pipeline	3.268	2.15195	1.81512	7.23508	1349.67	rail	0.674835	11778.3	1.15781	580.565	barge	0.319311
PRY	NH3	ship	13708.5	maritime	2024	base_without_pipeline	2.916	0.707488	0.0653002	3.68879	1349.67	rail	0.167224	11778.3	0.416952	580.565	barge	0.123312
PRY	MeOH	ship	13708.5	maritime	2024	base_without_pipeline	3.46714	0.773936	0.0177085	4.25879	1349.67	rail	0.172758	11778.3	0.471132	580.565	barge	0.130047
PRY	LOHC	ship	13708.5	maritime	2024	base_without_pipeline	3.54853	0.580452	0.0398442	4.16883	1349.67	rail	0.129568	11778.3	0.353349	580.565	barge	0.0975349
PSE	LH2	ship	2838.3	maritime	2024	base_without_pipeline	3.268	0.541247	0.700926	4.51017	0	none	0	2257.74	0.221936	580.565	barge	0.319311
PSE	NH3	ship	2838.3	maritime	2024	base_without_pipeline	2.916	0.203236	0.0252162	3.14445	0	none	0	2257.74	0.079924	580.565	barge	0.123312
PSE	MeOH	ship	2838.3	maritime	2024	base_without_pipeline	3.46714	0.220356	0.00683831	3.69434	0	none	0	2257.74	0.0903096	580.565	barge	0.130047
PSE	LOHC	ship	2838.3	maritime	2024	base_without_pipeline	3.54853	0.165267	0.0153862	3.72918	0	none	0	2257.74	0.0677322	580.565	barge	0.0975349
PYF	LH2	ship	17677.3	maritime	2024	base_without_pipeline	3.268	1.99992	2.22192	7.48984	0	none	0	17096.7	1.68061	580.565	barge	0.319311
PYF	NH3	ship	17677.3	maritime	2024	base_without_pipeline	2.916	0.728535	0.0799349	3.72447	0	none	0	17096.7	0.605223	580.565	barge	0.123312
PYF	MeOH	ship	17677.3	maritime	2024	base_without_pipeline	3.46714	0.813915	0.0216773	4.30273	0	none	0	17096.7	0.683868	580.565	barge	0.130047
PYF	LOHC	ship	17677.3	maritime	2024	base_without_pipeline	3.54853	0.610436	0.0487738	4.20774	0	none	0	17096.7	0.512901	580.565	barge	0.0975349
QAT	LH2	ship	8617.86	maritime	2024	base_without_pipeline	3.268	1.12417	1.29333	5.6855	29.4853	truck	0.0176912	8007.81	0.787168	580.565	barge	0.319311
QAT	NH3	ship	8617.86	maritime	2024	base_without_pipeline	2.916	0.436362	0.0465284	3.39889	29.4853	truck	0.0295738	8007.81	0.283476	580.565	barge	0.123312
QAT	MeOH	ship	8617.86	maritime	2024	base_without_pipeline	3.46714	0.481024	0.0126179	3.96078	29.4853	truck	0.0306647	8007.81	0.320312	580.565	barge	0.130047
QAT	LOHC	ship	8617.86	maritime	2024	base_without_pipeline	3.54853	0.360768	0.0283902	3.93769	29.4853	truck	0.0229985	8007.81	0.240234	580.565	barge	0.0975349
REU	LH2	ship	10160.9	maritime	2024	base_without_pipeline	3.268	1.26106	1.45149	5.98055	0	none	0	9580.35	0.941748	580.565	barge	0.319311
REU	NH3	ship	10160.9	maritime	2024	base_without_pipeline	2.916	0.462456	0.0522184	3.43067	0	none	0	9580.35	0.339144	580.565	barge	0.123312
REU	MeOH	ship	10160.9	maritime	2024	base_without_pipeline	3.46714	0.513261	0.0141609	3.99456	0	none	0	9580.35	0.383214	580.565	barge	0.130047
REU	LOHC	ship	10160.9	maritime	2024	base_without_pipeline	3.54853	0.384945	0.0318621	3.96534	0	none	0	9580.35	0.287411	580.565	barge	0.0975349
ROU	CH2	truck	1760	land	2024	base_without_pipeline	0.263158	5.28	0.708	6.25116
ROU	LH2	truck	1760	land	2024	base_without_pipeline	3.268	1.056	0.322533	4.64653
ROU	LH2	rail	1760	land	2024	base_without_pipeline	3.268	0.88	0.282444	4.43044
ROU	LH2	barge	1760	land	2024	base_without_pipeline	3.268	0.968	0.546667	4.78267
ROU	NH3	truck	1760	land	2024	base_without_pipeline	2.916	1.76528	0.0116033	4.69288
ROU	NH3	rail	1760	land	2024	base_without_pipeline	2.916	0.218064	0.0101611	3.14423
ROU	NH3	barge	1760	land	2024	base_without_pipeline	2.916	0.373824	0.0196667	3.30949
ROU	MeOH	truck	1760	land	2024	base_without_pipeline	3.46714	1.8304	0.00314667	5.30069
ROU	MeOH	rail	1760	land	2024	base_without_pipeline	3.46714	0.22528	0.00275556	3.69518
ROU	MeOH	barge	1760	land	2024	base_without_pipeline	3.46714	0.39424	0.00533333	3.86672
ROU	LOHC	truck	1760	land	2024	base_without_pipeline	3.54853	1.3728	0.00708	4.92841
ROU	LOHC	rail	1760	land	2024	base_without_pipeline	3.54853	0.16896	0.0062	3.72369
ROU	LOHC	barge	1760	land	2024	base_without_pipeline	3.54853	0.29568	0.012	3.85621
ROU	LH2	ship	3641.26	maritime	2024	base_without_pipeline	3.268	0.721978	0.783229	4.77321	202.912	truck	0.121747	2857.78	0.28092	580.565	barge	0.319311
ROU	NH3	ship	3641.26	maritime	2024	base_without_pipeline	2.916	0.427998	0.0281771	3.37218	202.912	truck	0.203521	2857.78	0.101165	580.565	barge	0.123312
ROU	MeOH	ship	3641.26	maritime	2024	base_without_pipeline	3.46714	0.455386	0.00764126	3.93017	202.912	truck	0.211028	2857.78	0.114311	580.565	barge	0.130047
ROU	LOHC	ship	3641.26	maritime	2024	base_without_pipeline	3.54853	0.34154	0.0171928	3.90726	202.912	truck	0.158271	2857.78	0.0857334	580.565	barge	0.0975349
RUS	LH2	ship	5622.83	maritime	2024	base_without_pipeline	3.268	1.42236	0.986341	5.6767	1512.07	rail	0.756035	3530.2	0.347019	580.565	barge	0.319311
RUS	NH3	ship	5622.83	maritime	2024	base_without_pipeline	2.916	0.435627	0.0354842	3.38711	1512.07	rail	0.187345	3530.2	0.124969	580.565	barge	0.123312
RUS	MeOH	ship	5622.83	maritime	2024	base_without_pipeline	3.46714	0.4648	0.00962283	3.94157	1512.07	rail	0.193545	3530.2	0.141208	580.565	barge	0.130047
RUS	LOHC	ship	5622.83	maritime	2024	base_without_pipeline	3.54853	0.3486	0.0216514	3.91878	1512.07	rail	0.145159	3530.2	0.105906	580.565	barge	0.0975349
RWA	CH2	truck	9522.53	land	2024	base_without_pipeline	0.263158	28.5676	3.03676	31.8675
RWA	LH2	truck	9522.53	land	2024	base_without_pipeline	3.268	5.71352	1.38341	10.3649
RWA	LH2	rail	9522.53	land	2024	base_without_pipeline	3.268	4.76127	1.16651	9.19578
RWA	NH3	truck	9522.53	land	2024	base_without_pipeline	2.916	9.5511	0.0497691	12.5169
RWA	NH3	rail	9522.53	land	2024	base_without_pipeline	2.916	1.17984	0.0419659	4.13781
RWA	MeOH	truck	9522.53	land	2024	base_without_pipeline	3.46714	9.90343	0.0134967	13.3841
RWA	MeOH	rail	9522.53	land	2024	base_without_pipeline	3.46714	1.21888	0.0113806	4.69741
RWA	LOHC	truck	9522.53	land	2024	base_without_pipeline	3.54853	7.42757	0.0303676	11.0065
RWA	LOHC	rail	9522.53	land	2024	base_without_pipeline	3.54853	0.914163	0.0256063	4.4883
RWA	LH2	ship	9957.76	maritime	2024	base_without_pipeline	3.268	1.77576	1.43067	6.47443	1331.01	rail	0.665505	8046.18	0.790939	580.565	barge	0.319311
RWA	NH3	ship	9957.76	maritime	2024	base_without_pipeline	2.916	0.573059	0.0514692	3.54053	1331.01	rail	0.164912	8046.18	0.284835	580.565	barge	0.123312
RWA	MeOH	ship	9957.76	maritime	2024	base_without_pipeline	3.46714	0.622263	0.0139578	4.10336	1331.01	rail	0.170369	8046.18	0.321847	580.565	barge	0.130047
RWA	LOHC	ship	9957.76	maritime	2024	base_without_pipeline	3.54853	0.466697	0.0314049	4.04663	1331.01	rail	0.127777	8046.18	0.241385	580.565	barge	0.0975349
SAU	LH2	ship	4918.6	maritime	2024	base_without_pipeline	3.268	1.23372	0.914157	5.41588	972.66	truck	0.583596	3365.38	0.330817	580.565	barge	0.319311
SAU	NH3	ship	4918.6	maritime	2024	base_without_pipeline	2.916	1.21802	0.0328874	4.16691	972.66	truck	0.975578	3365.38	0.119134	580.565	barge	0.123312
SAU	MeOH	ship	4918.6	maritime	2024	base_without_pipeline	3.46714	1.27623	0.0089186	4.75229	972.66	truck	1.01157	3365.38	0.134615	580.565	barge	0.130047
SAU	LOHC	ship	4918.6	maritime	2024	base_without_pipeline	3.54853	0.957171	0.0200669	4.52577	972.66	truck	0.758675	3365.38	0.100961	580.565	barge	0.0975349
SDN	LH2	ship	4909.01	maritime	2024	base_without_pipeline	3.268	1.20234	0.913174	5.38352	1139.02	rail	0.56951	3189.43	0.313521	580.565	barge	0.319311
SDN	NH3	ship	4909.01	maritime	2024	base_without_pipeline	2.916	0.377342	0.032852	3.32619	1139.02	rail	0.141125	3189.43	0.112906	580.565	barge	0.123312
SDN	MeOH	ship	4909.01	maritime	2024	base_without_pipeline	3.46714	0.403418	0.00890901	3.87947	1139.02	rail	0.145795	3189.43	0.127577	580.565	barge	0.130047
SDN	LOHC	ship	4909.01	maritime	2024	base_without_pipeline	3.54853	0.302564	0.0200453	3.87114	1139.02	rail	0.109346	3189.43	0.0956829	580.565	barge	0.0975349
SEN	LH2	ship	4429.43	maritime	2024	base_without_pipeline	3.268	0.697655	0.864017	4.82967	0	none	0	3848.87	0.378344	580.565	barge	0.319311
SEN	NH3	ship	4429.43	maritime	2024	base_without_pipeline	2.916	0.259562	0.0310835	3.20665	0	none	0	3848.87	0.13625	580.565	barge	0.123312
SEN	MeOH	ship	4429.43	maritime	2024	base_without_pipeline	3.46714	0.284001	0.00842943	3.75957	0	none	0	3848.87	0.153955	580.565	barge	0.130047
SEN	LOHC	ship	4429.43	maritime	2024	base_without_pipeline	3.54853	0.213001	0.0189662	3.7805	0	none	0	3848.87	0.115466	580.565	barge	0.0975349
SGP	LH2	ship	11575.8	maritime	2024	base_without_pipeline	3.268	1.40014	1.59652	6.26465	0	none	0	10995.2	1.08083	580.565	barge	0.319311
SGP	NH3	ship	11575.8	maritime	2024	base_without_pipeline	2.916	0.512542	0.0574356	3.48598	0	none	0	10995.2	0.38923	580.565	barge	0.123312
SGP	MeOH	ship	11575.8	maritime	2024	base_without_pipeline	3.46714	0.569855	0.0155758	4.05257	0	none	0	10995.2	0.439808	580.565	barge	0.130047
SGP	LOHC	ship	11575.8	maritime	2024	base_without_pipeline	3.54853	0.427391	0.0350455	4.01097	0	none	0	10995.2	0.329856	580.565	barge	0.0975349
SHN	LH2	ship	11065.7	maritime	2024	base_without_pipeline	3.268	1.35	1.54423	6.16223	0	none	0	10485.1	1.03069	580.565	barge	0.319311
SHN	NH3	ship	11065.7	maritime	2024	base_without_pipeline	2.916	0.494485	0.0555546	3.46604	0	none	0	10485.1	0.371173	580.565	barge	0.123312
SHN	MeOH	ship	11065.7	maritime	2024	base_without_pipeline	3.46714	0.549451	0.0150657	4.03166	0	none	0	10485.1	0.419404	580.565	barge	0.130047
SHN	LOHC	ship	11065.7	maritime	2024	base_without_pipeline	3.54853	0.412088	0.0338977	3.99452	0	none	0	10485.1	0.314553	580.565	barge	0.0975349
SLB	LH2	ship	17556.4	maritime	2024	base_without_pipeline	3.268	1.98803	2.20953	7.46556	0	none	0	16975.8	1.66872	580.565	barge	0.319311
SLB	NH3	ship	17556.4	maritime	2024	base_without_pipeline	2.916	0.724255	0.0794891	3.71974	0	none	0	16975.8	0.600943	580.565	barge	0.123312
SLB	MeOH	ship	17556.4	maritime	2024	base_without_pipeline	3.46714	0.809079	0.0215564	4.29778	0	none	0	16975.8	0.679032	580.565	barge	0.130047
SLB	LOHC	ship	17556.4	maritime	2024	base_without_pipeline	3.54853	0.606809	0.0485018	4.20384	0	none	0	16975.8	0.509274	580.565	barge	0.0975349
SLE	LH2	ship	5675.49	maritime	2024	base_without_pipeline	3.268	0.912186	0.991738	5.17192	183.464	truck	0.110078	4911.46	0.482797	580.565	barge	0.319311
SLE	NH3	ship	5675.49	maritime	2024	base_without_pipeline	2.916	0.481192	0.0356784	3.43287	183.464	truck	0.184014	4911.46	0.173866	580.565	barge	0.123312
SLE	MeOH	ship	5675.49	maritime	2024	base_without_pipeline	3.46714	0.517308	0.00967549	3.99413	183.464	truck	0.190803	4911.46	0.196458	580.565	barge	0.130047
SLE	LOHC	ship	5675.49	maritime	2024	base_without_pipeline	3.54853	0.387981	0.0217699	3.95828	183.464	truck	0.143102	4911.46	0.147344	580.565	barge	0.0975349
SLV	LH2	ship	10930.3	maritime	2024	base_without_pipeline	3.268	1.3588	1.53035	6.15716	44.0883	truck	0.026453	10305.6	1.01304	580.565	barge	0.319311
SLV	NH3	ship	10930.3	maritime	2024	base_without_pipeline	2.916	0.532351	0.0550553	3.50341	44.0883	truck	0.0442206	10305.6	0.364818	580.565	barge	0.123312
SLV	MeOH	ship	10930.3	maritime	2024	base_without_pipeline	3.46714	0.588122	0.0149303	4.0702	44.0883	truck	0.0458518	10305.6	0.412224	580.565	barge	0.130047
SLV	LOHC	ship	10930.3	maritime	2024	base_without_pipeline	3.54853	0.441092	0.0335931	4.02321	44.0883	truck	0.0343889	10305.6	0.309168	580.565	barge	0.0975349
SMR	CH2	truck	820.38	land	2024	base_without_pipeline	0.263158	2.46114	0.426114	3.15041
SMR	LH2	truck	820.38	land	2024	base_without_pipeline	3.268	0.492228	0.194119	3.95435
SMR	LH2	rail	820.38	land	2024	base_without_pipeline	3.268	0.41019	0.175432	3.85362
SMR	NH3	truck	820.38	land	2024	base_without_pipeline	2.916	0.822841	0.00698354	3.74582
SMR	NH3	rail	820.38	land	2024	base_without_pipeline	2.916	0.101645	0.00631128	3.02396
SMR	MeOH	truck	820.38	land	2024	base_without_pipeline	3.46714	0.853195	0.00189384	4.32223
SMR	MeOH	rail	820.38	land	2024	base_without_pipeline	3.46714	0.105009	0.00171153	3.57386
SMR	LOHC	truck	820.38	land	2024	base_without_pipeline	3.54853	0.639896	0.00426114	4.19269
SMR	LOHC	rail	820.38	land	2024	base_without_pipeline	3.54853	0.0787565	0.00385095	3.63114
SOM	LH2	ship	7417.5	maritime	2024	base_without_pipeline	3.268	1.26733	1.17029	5.70562	550.022	truck	0.330013	6286.91	0.618003	580.565	barge	0.319311
SOM	NH3	ship	7417.5	maritime	2024	base_without_pipeline	2.916	0.897541	0.042102	3.85564	550.022	truck	0.551672	6286.91	0.222557	580.565	barge	0.123312
SOM	MeOH	ship	7417.5	maritime	2024	base_without_pipeline	3.46714	0.953546	0.0114175	4.43211	550.022	truck	0.572025	6286.91	0.251476	580.565	barge	0.130047
SOM	LOHC	ship	7417.5	maritime	2024	base_without_pipeline	3.54853	0.715159	0.0256894	4.28938	550.022	truck	0.429017	6286.91	0.188607	580.565	barge	0.0975349
SPM	LH2	ship	6146.23	maritime	2024	base_without_pipeline	3.268	0.866415	1.03999	5.1744	0	none	0	5565.66	0.547104	580.565	barge	0.319311
SPM	NH3	ship	6146.23	maritime	2024	base_without_pipeline	2.916	0.320336	0.0374142	3.27375	0	none	0	5565.66	0.197024	580.565	barge	0.123312
SPM	MeOH	ship	6146.23	maritime	2024	base_without_pipeline	3.46714	0.352673	0.0101462	3.82996	0	none	0	5565.66	0.222626	580.565	barge	0.130047
SPM	LOHC	ship	6146.23	maritime	2024	base_without_pipeline	3.54853	0.264505	0.022829	3.83586	0	none	0	5565.66	0.16697	580.565	barge	0.0975349
SRB	CH2	truck	1350	land	2024	base_without_pipeline	0.263158	4.05	0.585	4.89816
SRB	LH2	truck	1350	land	2024	base_without_pipeline	3.268	0.81	0.2665	4.3445
SRB	LH2	rail	1350	land	2024	base_without_pipeline	3.268	0.675	0.23575	4.17875
SRB	NH3	truck	1350	land	2024	base_without_pipeline	2.916	1.35405	0.0095875	4.27964
SRB	NH3	rail	1350	land	2024	base_without_pipeline	2.916	0.167265	0.00848125	3.09175
SRB	MeOH	truck	1350	land	2024	base_without_pipeline	3.46714	1.404	0.0026	4.87374
SRB	MeOH	rail	1350	land	2024	base_without_pipeline	3.46714	0.1728	0.0023	3.64224
SRB	LOHC	truck	1350	land	2024	base_without_pipeline	3.54853	1.053	0.00585	4.60738
SRB	LOHC	rail	1350	land	2024	base_without_pipeline	3.54853	0.1296	0.005175	3.6833
SRB	LH2	ship	2626.61	maritime	2024	base_without_pipeline	3.268	0.723265	0.679227	4.67049	404.282	truck	0.242569	1641.76	0.161385	580.565	barge	0.319311
SRB	NH3	ship	2626.61	maritime	2024	base_without_pipeline	2.916	0.586925	0.0244356	3.52736	404.282	truck	0.405495	1641.76	0.0581183	580.565	barge	0.123312
SRB	MeOH	ship	2626.61	maritime	2024	base_without_pipeline	3.46714	0.61617	0.00662661	4.08994	404.282	truck	0.420453	1641.76	0.0656704	580.565	barge	0.130047
SRB	LOHC	ship	2626.61	maritime	2024	base_without_pipeline	3.54853	0.462128	0.0149099	4.02557	404.282	truck	0.31534	1641.76	0.0492528	580.565	barge	0.0975349
STP	LH2	ship	7915.36	maritime	2024	base_without_pipeline	3.268	1.04032	1.22132	5.52965	0	none	0	7334.8	0.721011	580.565	barge	0.319311
STP	NH3	ship	7915.36	maritime	2024	base_without_pipeline	2.916	0.382964	0.0439379	3.3429	0	none	0	7334.8	0.259652	580.565	barge	0.123312
STP	MeOH	ship	7915.36	maritime	2024	base_without_pipeline	3.46714	0.423439	0.0119154	3.9025	0	none	0	7334.8	0.293392	580.565	barge	0.130047
STP	LOHC	ship	7915.36	maritime	2024	base_without_pipeline	3.54853	0.317579	0.0268096	3.89292	0	none	0	7334.8	0.220044	580.565	barge	0.0975349
SUR	LH2	ship	7056.46	maritime	2024	base_without_pipeline	3.268	0.955901	1.13329	5.35719	0.0195	truck	1.17e-05	6475.88	0.636579	580.565	barge	0.319311
SUR	NH3	ship	7056.46	maritime	2024	base_without_pipeline	2.916	0.352578	0.0407707	3.30935	0.0195	truck	1.95585e-05	6475.88	0.229246	580.565	barge	0.123312
SUR	MeOH	ship	7056.46	maritime	2024	base_without_pipeline	3.46714	0.389102	0.0110565	3.8673	0.0195	truck	2.028e-05	6475.88	0.259035	580.565	barge	0.130047
SUR	LOHC	ship	7056.46	maritime	2024	base_without_pipeline	3.54853	0.291827	0.024877	3.86523	0.0195	truck	1.521e-05	6475.88	0.194276	580.565	barge	0.0975349
SVK	CH2	truck	911.002	land	2024	base_without_pipeline	0.263158	2.73301	0.453301	3.44946
SVK	LH2	truck	911.002	land	2024	base_without_pipeline	3.268	0.546601	0.206504	4.0211
SVK	LH2	rail	911.002	land	2024	base_without_pipeline	3.268	0.455501	0.185753	3.90925
SVK	LH2	barge	911.002	land	2024	base_without_pipeline	3.268	0.501051	0.40163	4.17068
SVK	NH3	truck	911.002	land	2024	base_without_pipeline	2.916	0.913735	0.00742909	3.83716
SVK	NH3	rail	911.002	land	2024	base_without_pipeline	2.916	0.112873	0.00668258	3.03556
SVK	NH3	barge	911.002	land	2024	base_without_pipeline	2.916	0.193497	0.0144489	3.12395
SVK	MeOH	truck	911.002	land	2024	base_without_pipeline	3.46714	0.947442	0.00201467	4.4166
SVK	MeOH	rail	911.002	land	2024	base_without_pipeline	3.46714	0.116608	0.00181222	3.58556
SVK	MeOH	barge	911.002	land	2024	base_without_pipeline	3.46714	0.204064	0.00391834	3.67513
SVK	LOHC	truck	911.002	land	2024	base_without_pipeline	3.54853	0.710582	0.00453301	4.26364
SVK	LOHC	rail	911.002	land	2024	base_without_pipeline	3.54853	0.0874562	0.0040775	3.64006
SVK	LOHC	barge	911.002	land	2024	base_without_pipeline	3.54853	0.153048	0.00881626	3.71039
SVN	CH2	truck	730	land	2024	base_without_pipeline	0.263158	2.19	0.399	2.85216
SVN	LH2	truck	730	land	2024	base_without_pipeline	3.268	0.438	0.181767	3.88777
SVN	LH2	rail	730	land	2024	base_without_pipeline	3.268	0.365	0.165139	3.79814
SVN	NH3	truck	730	land	2024	base_without_pipeline	2.916	0.73219	0.00653917	3.65473
SVN	NH3	rail	730	land	2024	base_without_pipeline	2.916	0.090447	0.00594097	3.01239
SVN	MeOH	truck	730	land	2024	base_without_pipeline	3.46714	0.7592	0.00177333	4.22812
SVN	MeOH	rail	730	land	2024	base_without_pipeline	3.46714	0.09344	0.00161111	3.56219
SVN	LOHC	truck	730	land	2024	base_without_pipeline	3.54853	0.5694	0.00399	4.12192
SVN	LOHC	rail	730	land	2024	base_without_pipeline	3.54853	0.07008	0.003625	3.62223
SVN	LH2	ship	2668.86	maritime	2024	base_without_pipeline	3.268	0.58011	0.683558	4.53167	110.663	truck	0.0663978	1977.63	0.194401	580.565	barge	0.319311
SVN	NH3	ship	2668.86	maritime	2024	base_without_pipeline	2.916	0.304315	0.0245914	3.24491	110.663	truck	0.110995	1977.63	0.0700081	580.565	barge	0.123312
SVN	MeOH	ship	2668.86	maritime	2024	base_without_pipeline	3.46714	0.324241	0.00666886	3.79805	110.663	truck	0.11509	1977.63	0.0791052	580.565	barge	0.130047
SVN	LOHC	ship	2668.86	maritime	2024	base_without_pipeline	3.54853	0.243181	0.0150049	3.80672	110.663	truck	0.0863171	1977.63	0.0593289	580.565	barge	0.0975349
SWE	CH2	truck	1750	land	2024	base_without_pipeline	0.263158	5.25	0.705	6.21816
SWE	LH2	truck	1750	land	2024	base_without_pipeline	3.268	1.05	0.321167	4.63917
SWE	LH2	rail	1750	land	2024	base_without_pipeline	3.268	0.875	0.281306	4.42431
SWE	NH3	truck	1750	land	2024	base_without_pipeline	2.916	1.75525	0.0115542	4.6828
SWE	NH3	rail	1750	land	2024	base_without_pipeline	2.916	0.216825	0.0101201	3.14295
SWE	MeOH	truck	1750	land	2024	base_without_pipeline	3.46714	1.82	0.00313333	5.29028
SWE	MeOH	rail	1750	land	2024	base_without_pipeline	3.46714	0.224	0.00274444	3.69389
SWE	LOHC	truck	1750	land	2024	base_without_pipeline	3.54853	1.365	0.00705	4.92058
SWE	LOHC	rail	1750	land	2024	base_without_pipeline	3.54853	0.168	0.006175	3.7227
SWE	LH2	ship	5230.09	maritime	2024	base_without_pipeline	3.268	1.01305	0.946084	5.22713	471.773	truck	0.283064	4177.75	0.410673	580.565	barge	0.319311
SWE	NH3	ship	5230.09	maritime	2024	base_without_pipeline	2.916	0.744393	0.0340359	3.69443	471.773	truck	0.473188	4177.75	0.147892	580.565	barge	0.123312
SWE	MeOH	ship	5230.09	maritime	2024	base_without_pipeline	3.46714	0.7878	0.00923009	4.26417	471.773	truck	0.490644	4177.75	0.16711	580.565	barge	0.130047
SWE	LOHC	ship	5230.09	maritime	2024	base_without_pipeline	3.54853	0.59085	0.0207677	4.16015	471.773	truck	0.367983	4177.75	0.125333	580.565	barge	0.0975349
SWZ	CH2	truck	13254.8	land	2024	base_without_pipeline	0.263158	39.7644	4.15644	44.184
SWZ	LH2	truck	13254.8	land	2024	base_without_pipeline	3.268	7.95288	1.89349	13.1144
SWZ	LH2	rail	13254.8	land	2024	base_without_pipeline	3.268	6.6274	1.59157	11.487
SWZ	NH3	truck	13254.8	land	2024	base_without_pipeline	2.916	13.2946	0.0681194	16.2787
SWZ	NH3	rail	13254.8	land	2024	base_without_pipeline	2.916	1.64227	0.0572579	4.61553
SWZ	MeOH	truck	13254.8	land	2024	base_without_pipeline	3.46714	13.785	0.0184731	17.2706
SWZ	MeOH	rail	13254.8	land	2024	base_without_pipeline	3.46714	1.69661	0.0155276	5.17928
SWZ	LOHC	truck	13254.8	land	2024	base_without_pipeline	3.54853	10.3387	0.0415644	13.9288
SWZ	LOHC	rail	13254.8	land	2024	base_without_pipeline	3.54853	1.27246	0.034937	4.85593
SWZ	LH2	ship	11456	maritime	2024	base_without_pipeline	3.268	1.5475	1.58424	6.39974	317.175	truck	0.190305	10558.3	1.03788	580.565	barge	0.319311
SWZ	NH3	ship	11456	maritime	2024	base_without_pipeline	2.916	0.815202	0.0569941	3.7882	317.175	truck	0.318127	10558.3	0.373764	580.565	barge	0.123312
SWZ	MeOH	ship	11456	maritime	2024	base_without_pipeline	3.46714	0.882241	0.015456	4.36484	317.175	truck	0.329862	10558.3	0.422332	580.565	barge	0.130047
SWZ	LOHC	ship	11456	maritime	2024	base_without_pipeline	3.54853	0.66168	0.0347761	4.24499	317.175	truck	0.247396	10558.3	0.316749	580.565	barge	0.0975349
SYC	LH2	ship	8037.03	maritime	2024	base_without_pipeline	3.268	1.05228	1.2338	5.55408	0	none	0	7456.47	0.732971	580.565	barge	0.319311
SYC	NH3	ship	8037.03	maritime	2024	base_without_pipeline	2.916	0.387271	0.0443866	3.34766	0	none	0	7456.47	0.263959	580.565	barge	0.123312
SYC	MeOH	ship	8037.03	maritime	2024	base_without_pipeline	3.46714	0.428305	0.012037	3.90749	0	none	0	7456.47	0.298259	580.565	barge	0.130047
SYC	LOHC	ship	8037.03	maritime	2024	base_without_pipeline	3.54853	0.321229	0.0270833	3.89684	0	none	0	7456.47	0.223694	580.565	barge	0.0975349
SYR	LH2	ship	3265.66	maritime	2024	base_without_pipeline	3.268	0.68855	0.74473	4.70128	209.875	truck	0.125925	2475.22	0.243314	580.565	barge	0.319311
SYR	NH3	ship	3265.66	maritime	2024	base_without_pipeline	2.916	0.421439	0.0267921	3.36423	209.875	truck	0.210505	2475.22	0.0876228	580.565	barge	0.123312
SYR	MeOH	ship	3265.66	maritime	2024	base_without_pipeline	3.46714	0.447325	0.00726566	3.92173	209.875	truck	0.21827	2475.22	0.0990088	580.565	barge	0.130047
SYR	LOHC	ship	3265.66	maritime	2024	base_without_pipeline	3.54853	0.335494	0.0163477	3.90037	209.875	truck	0.163703	2475.22	0.0742566	580.565	barge	0.0975349
TCA	LH2	ship	8098.52	maritime	2024	base_without_pipeline	3.268	1.05833	1.2401	5.56643	0	none	0	7517.96	0.739015	580.565	barge	0.319311
TCA	NH3	ship	8098.52	maritime	2024	base_without_pipeline	2.916	0.389448	0.0446133	3.35006	0	none	0	7517.96	0.266136	580.565	barge	0.123312
TCA	MeOH	ship	8098.52	maritime	2024	base_without_pipeline	3.46714	0.430765	0.0120985	3.91001	0	none	0	7517.96	0.300718	580.565	barge	0.130047
TCA	LOHC	ship	8098.52	maritime	2024	base_without_pipeline	3.54853	0.323074	0.0272217	3.89882	0	none	0	7517.96	0.225539	580.565	barge	0.0975349
TCD	CH2	truck	8244.92	land	2024	base_without_pipeline	0.263158	24.7348	2.65348	27.6514
TCD	LH2	truck	8244.92	land	2024	base_without_pipeline	3.268	4.94695	1.20881	9.42376
TCD	LH2	rail	8244.92	land	2024	base_without_pipeline	3.268	4.12246	1.021	8.41146
TCD	NH3	truck	8244.92	land	2024	base_without_pipeline	2.916	8.26965	0.0434875	11.2291
TCD	NH3	rail	8244.92	land	2024	base_without_pipeline	2.916	1.02155	0.0367313	3.97428
TCD	MeOH	truck	8244.92	land	2024	base_without_pipeline	3.46714	8.57472	0.0117932	12.0537
TCD	MeOH	rail	8244.92	land	2024	base_without_pipeline	3.46714	1.05535	0.00996102	4.53245
TCD	LOHC	truck	8244.92	land	2024	base_without_pipeline	3.54853	6.43104	0.0265348	10.0061
TCD	LOHC	rail	8244.92	land	2024	base_without_pipeline	3.54853	0.791512	0.0224123	4.36245
TCD	LH2	ship	9490.9	maritime	2024	base_without_pipeline	3.268	1.80928	1.38282	6.4601	1528.72	rail	0.76436	7381.61	0.725612	580.565	barge	0.319311
TCD	NH3	ship	9490.9	maritime	2024	base_without_pipeline	2.916	0.574029	0.0497477	3.53978	1528.72	rail	0.189408	7381.61	0.261309	580.565	barge	0.123312
TCD	MeOH	ship	9490.9	maritime	2024	base_without_pipeline	3.46714	0.620987	0.0134909	4.10162	1528.72	rail	0.195676	7381.61	0.295264	580.565	barge	0.130047
TCD	LOHC	ship	9490.9	maritime	2024	base_without_pipeline	3.54853	0.46574	0.0303545	4.04462	1528.72	rail	0.146757	7381.61	0.221448	580.565	barge	0.0975349
TGO	LH2	ship	7229.67	maritime	2024	base_without_pipeline	3.268	0.972917	1.15104	5.39196	0	none	0	6649.1	0.653607	580.565	barge	0.319311
TGO	NH3	ship	7229.67	maritime	2024	base_without_pipeline	2.916	0.35869	0.0414094	3.3161	0	none	0	6649.1	0.235378	580.565	barge	0.123312
TGO	MeOH	ship	7229.67	maritime	2024	base_without_pipeline	3.46714	0.396011	0.0112297	3.87438	0	none	0	6649.1	0.265964	580.565	barge	0.130047
TGO	LOHC	ship	7229.67	maritime	2024	base_without_pipeline	3.54853	0.297008	0.0252667	3.8708	0	none	0	6649.1	0.199473	580.565	barge	0.0975349
THA	LH2	ship	13289.8	maritime	2024	base_without_pipeline	3.268	1.57811	1.7722	6.61831	18.8995	truck	0.0113397	12690.3	1.24746	580.565	barge	0.319311
THA	NH3	ship	13289.8	maritime	2024	base_without_pipeline	2.916	0.591505	0.063756	3.57126	18.8995	truck	0.0189562	12690.3	0.449237	580.565	barge	0.123312
THA	MeOH	ship	13289.8	maritime	2024	base_without_pipeline	3.46714	0.657314	0.0172898	4.14175	18.8995	truck	0.0196555	12690.3	0.507612	580.565	barge	0.130047
THA	LOHC	ship	13289.8	maritime	2024	base_without_pipeline	3.54853	0.492986	0.038902	4.08042	18.8995	truck	0.0147416	12690.3	0.380709	580.565	barge	0.0975349
TJK	CH2	truck	6036.37	land	2024	base_without_pipeline	0.263158	18.1091	1.99091	20.3632
TJK	LH2	truck	6036.37	land	2024	base_without_pipeline	3.268	3.62182	0.906971	7.79679
TJK	LH2	rail	6036.37	land	2024	base_without_pipeline	3.268	3.01818	0.769475	7.05566
TJK	NH3	truck	6036.37	land	2024	base_without_pipeline	2.916	6.05448	0.0326288	9.00311
TJK	NH3	rail	6036.37	land	2024	base_without_pipeline	2.916	0.747906	0.0276823	3.69159
TJK	MeOH	truck	6036.37	land	2024	base_without_pipeline	3.46714	6.27782	0.00884849	9.75382
TJK	MeOH	rail	6036.37	land	2024	base_without_pipeline	3.46714	0.772655	0.00750708	4.24731
TJK	LOHC	truck	6036.37	land	2024	base_without_pipeline	3.54853	4.70837	0.0199091	8.27681
TJK	LOHC	rail	6036.37	land	2024	base_without_pipeline	3.54853	0.579492	0.0168909	4.14491
TJK	LH2	ship	10409.7	maritime	2024	base_without_pipeline	3.268	2.13059	1.47699	6.87558	2103.74	rail	1.05187	7725.39	0.759406	580.565	barge	0.319311
TJK	NH3	ship	10409.7	maritime	2024	base_without_pipeline	2.916	0.657444	0.0531358	3.62658	2103.74	rail	0.260653	7725.39	0.273479	580.565	barge	0.123312
TJK	MeOH	ship	10409.7	maritime	2024	base_without_pipeline	3.46714	0.708341	0.0144097	4.18989	2103.74	rail	0.269279	7725.39	0.309016	580.565	barge	0.130047
TJK	LOHC	ship	10409.7	maritime	2024	base_without_pipeline	3.54853	0.531256	0.0324218	4.11221	2103.74	rail	0.201959	7725.39	0.231762	580.565	barge	0.0975349
TKL	LH2	ship	19546.3	maritime	2024	base_without_pipeline	3.268	2.18364	2.41349	7.86513	0	none	0	18965.7	1.86433	580.565	barge	0.319311
TKL	NH3	ship	19546.3	maritime	2024	base_without_pipeline	2.916	0.794698	0.0868269	3.79752	0	none	0	18965.7	0.671386	580.565	barge	0.123312
TKL	MeOH	ship	19546.3	maritime	2024	base_without_pipeline	3.46714	0.888675	0.0235463	4.37936	0	none	0	18965.7	0.758628	580.565	barge	0.130047
TKL	LOHC	ship	19546.3	maritime	2024	base_without_pipeline	3.54853	0.666506	0.0529791	4.26801	0	none	0	18965.7	0.568971	580.565	barge	0.0975349
TKM	CH2	truck	5537.84	land	2024	base_without_pipeline	0.263158	16.6135	1.84135	18.718
TKM	LH2	truck	5537.84	land	2024	base_without_pipeline	3.268	3.3227	0.838838	7.42954
TKM	LH2	rail	5537.84	land	2024	base_without_pipeline	3.268	2.76892	0.712698	6.74962
TKM	NH3	truck	5537.84	land	2024	base_without_pipeline	2.916	5.55445	0.0301777	8.50063
TKM	NH3	rail	5537.84	land	2024	base_without_pipeline	2.916	0.686138	0.0256398	3.62778
TKM	MeOH	truck	5537.84	land	2024	base_without_pipeline	3.46714	5.75935	0.00818379	9.23468
TKM	MeOH	rail	5537.84	land	2024	base_without_pipeline	3.46714	0.708844	0.00695316	4.18294
TKM	LOHC	truck	5537.84	land	2024	base_without_pipeline	3.54853	4.31952	0.0184135	7.88646
TKM	LOHC	rail	5537.84	land	2024	base_without_pipeline	3.54853	0.531633	0.0156446	4.09581
TKM	LH2	ship	10150.1	maritime	2024	base_without_pipeline	3.268	2.04234	1.45039	6.76073	1947.57	rail	0.973785	7622.01	0.749244	580.565	barge	0.319311
TKM	NH3	ship	10150.1	maritime	2024	base_without_pipeline	2.916	0.634435	0.0521787	3.60261	1947.57	rail	0.241304	7622.01	0.269819	580.565	barge	0.123312
TKM	MeOH	ship	10150.1	maritime	2024	base_without_pipeline	3.46714	0.684216	0.0141501	4.16551	1947.57	rail	0.249289	7622.01	0.30488	580.565	barge	0.130047
TKM	LOHC	ship	10150.1	maritime	2024	base_without_pipeline	3.54853	0.513162	0.0318378	4.09353	1947.57	rail	0.186967	7622.01	0.22866	580.565	barge	0.0975349
TLS	LH2	ship	14624.1	maritime	2024	base_without_pipeline	3.268	1.8024	1.90897	6.97937	204.527	truck	0.122716	13839	1.36037	580.565	barge	0.319311
TLS	NH3	ship	14624.1	maritime	2024	base_without_pipeline	2.916	0.818353	0.0686763	3.80303	204.527	truck	0.205141	13839	0.489901	580.565	barge	0.123312
TLS	MeOH	ship	14624.1	maritime	2024	base_without_pipeline	3.46714	0.896315	0.0186241	4.38208	204.527	truck	0.212708	13839	0.55356	580.565	barge	0.130047
TLS	LOHC	ship	14624.1	maritime	2024	base_without_pipeline	3.54853	0.672236	0.0419042	4.26267	204.527	truck	0.159531	13839	0.41517	580.565	barge	0.0975349
TON	LH2	ship	20081.5	maritime	2024	base_without_pipeline	3.268	2.23625	2.46835	7.9726	0	none	0	19500.9	1.91694	580.565	barge	0.319311
TON	NH3	ship	20081.5	maritime	2024	base_without_pipeline	2.916	0.813644	0.0888004	3.81844	0	none	0	19500.9	0.690332	580.565	barge	0.123312
TON	MeOH	ship	20081.5	maritime	2024	base_without_pipeline	3.46714	0.910083	0.0240815	4.40131	0	none	0	19500.9	0.780036	580.565	barge	0.130047
TON	LOHC	ship	20081.5	maritime	2024	base_without_pipeline	3.54853	0.682562	0.0541833	4.28527	0	none	0	19500.9	0.585027	580.565	barge	0.0975349
TTO	LH2	ship	7539.11	maritime	2024	base_without_pipeline	3.268	1.00334	1.18276	5.4541	0	none	0	6958.55	0.684025	580.565	barge	0.319311
TTO	NH3	ship	7539.11	maritime	2024	base_without_pipeline	2.916	0.369645	0.0425505	3.3282	0	none	0	6958.55	0.246333	580.565	barge	0.123312
TTO	MeOH	ship	7539.11	maritime	2024	base_without_pipeline	3.46714	0.408389	0.0115391	3.88707	0	none	0	6958.55	0.278342	580.565	barge	0.130047
TTO	LOHC	ship	7539.11	maritime	2024	base_without_pipeline	3.54853	0.306291	0.025963	3.88078	0	none	0	6958.55	0.208757	580.565	barge	0.0975349
TUN	LH2	ship	1344.36	maritime	2024	base_without_pipeline	3.268	0.398112	0.547797	4.21391	7.41421	truck	0.00444853	756.383	0.0743524	580.565	barge	0.319311
TUN	NH3	ship	1344.36	maritime	2024	base_without_pipeline	2.916	0.157524	0.0197073	3.09323	7.41421	truck	0.00743645	756.383	0.026776	580.565	barge	0.123312
TUN	MeOH	ship	1344.36	maritime	2024	base_without_pipeline	3.46714	0.168013	0.00534436	3.6405	7.41421	truck	0.00771078	756.383	0.0302553	580.565	barge	0.130047
TUN	LOHC	ship	1344.36	maritime	2024	base_without_pipeline	3.54853	0.126009	0.0120248	3.68656	7.41421	truck	0.00578308	756.383	0.0226915	580.565	barge	0.0975349
TUR	CH2	truck	2400	land	2024	base_without_pipeline	0.263158	7.2	0.9	8.36316
TUR	LH2	truck	2400	land	2024	base_without_pipeline	3.268	1.44	0.41	5.118
TUR	LH2	rail	2400	land	2024	base_without_pipeline	3.268	1.2	0.355333	4.82333
TUR	NH3	truck	2400	land	2024	base_without_pipeline	2.916	2.4072	0.01475	5.33795
TUR	NH3	rail	2400	land	2024	base_without_pipeline	2.916	0.29736	0.0127833	3.22614
TUR	MeOH	truck	2400	land	2024	base_without_pipeline	3.46714	2.496	0.004	5.96714
TUR	MeOH	rail	2400	land	2024	base_without_pipeline	3.46714	0.3072	0.00346667	3.77781
TUR	LOHC	truck	2400	land	2024	base_without_pipeline	3.54853	1.872	0.009	5.42953
TUR	LOHC	rail	2400	land	2024	base_without_pipeline	3.54853	0.2304	0.0078	3.78673
TUR	LH2	ship	3489.79	maritime	2024	base_without_pipeline	3.268	0.844046	0.767704	4.87975	475.899	truck	0.285539	2433.33	0.239196	580.565	barge	0.319311
TUR	NH3	ship	3489.79	maritime	2024	base_without_pipeline	2.916	0.686779	0.0276186	3.6304	475.899	truck	0.477327	2433.33	0.0861399	580.565	barge	0.123312
TUR	MeOH	ship	3489.79	maritime	2024	base_without_pipeline	3.46714	0.722315	0.00748979	4.19695	475.899	truck	0.494935	2433.33	0.0973332	580.565	barge	0.130047
TUR	LOHC	ship	3489.79	maritime	2024	base_without_pipeline	3.54853	0.541736	0.016852	4.10712	475.899	truck	0.371201	2433.33	0.0729999	580.565	barge	0.0975349
TUV	LH2	ship	19784.3	maritime	2024	base_without_pipeline	3.268	2.20703	2.43789	7.91292	0	none	0	19203.7	1.88772	580.565	barge	0.319311
TUV	NH3	ship	19784.3	maritime	2024	base_without_pipeline	2.916	0.803123	0.0877045	3.80683	0	none	0	19203.7	0.679811	580.565	barge	0.123312
TUV	MeOH	ship	19784.3	maritime	2024	base_without_pipeline	3.46714	0.898195	0.0237843	4.38912	0	none	0	19203.7	0.768148	580.565	barge	0.130047
TUV	LOHC	ship	19784.3	maritime	2024	base_without_pipeline	3.54853	0.673646	0.0535146	4.27569	0	none	0	19203.7	0.576111	580.565	barge	0.0975349
TWN	LH2	ship	15251.7	maritime	2024	base_without_pipeline	3.268	1.93547	1.9733	7.17677	346.801	truck	0.208081	14324.3	1.40808	580.565	barge	0.319311
TWN	NH3	ship	15251.7	maritime	2024	base_without_pipeline	2.916	0.978234	0.0709905	3.96522	346.801	truck	0.347841	14324.3	0.50708	580.565	barge	0.123312
TWN	MeOH	ship	15251.7	maritime	2024	base_without_pipeline	3.46714	1.06369	0.0192517	4.55009	346.801	truck	0.360673	14324.3	0.572972	580.565	barge	0.130047
TWN	LOHC	ship	15251.7	maritime	2024	base_without_pipeline	3.54853	0.797769	0.0433162	4.38961	346.801	truck	0.270505	14324.3	0.429729	580.565	barge	0.0975349
TZA	LH2	ship	8822.07	maritime	2024	base_without_pipeline	3.268	1.22679	1.31426	5.80905	194.024	truck	0.116414	8047.48	0.791067	580.565	barge	0.319311
TZA	NH3	ship	8822.07	maritime	2024	base_without_pipeline	2.916	0.602799	0.0472814	3.56608	194.024	truck	0.194606	8047.48	0.284881	580.565	barge	0.123312
TZA	MeOH	ship	8822.07	maritime	2024	base_without_pipeline	3.46714	0.653731	0.0128221	4.1337	194.024	truck	0.201785	8047.48	0.321899	580.565	barge	0.130047
TZA	LOHC	ship	8822.07	maritime	2024	base_without_pipeline	3.54853	0.490298	0.0288497	4.06768	194.024	truck	0.151339	8047.48	0.241424	580.565	barge	0.0975349
UGA	CH2	truck	9078.22	land	2024	base_without_pipeline	0.263158	27.2347	2.90347	30.4013
UGA	LH2	truck	9078.22	land	2024	base_without_pipeline	3.268	5.44693	1.32269	10.0376
UGA	LH2	rail	9078.22	land	2024	base_without_pipeline	3.268	4.53911	1.11591	8.92302
UGA	NH3	truck	9078.22	land	2024	base_without_pipeline	2.916	9.10545	0.0475846	12.069
UGA	NH3	rail	9078.22	land	2024	base_without_pipeline	2.916	1.12479	0.0401455	4.08094
UGA	MeOH	truck	9078.22	land	2024	base_without_pipeline	3.46714	9.44135	0.0129043	12.9214
UGA	MeOH	rail	9078.22	land	2024	base_without_pipeline	3.46714	1.16201	0.0108869	4.64004
UGA	LOHC	truck	9078.22	land	2024	base_without_pipeline	3.54853	7.08101	0.0290347	10.6586
UGA	LOHC	rail	9078.22	land	2024	base_without_pipeline	3.54853	0.871509	0.0244956	4.44453
UGA	LH2	ship	9454.77	maritime	2024	base_without_pipeline	3.268	1.64856	1.37911	6.29568	1137.46	rail	0.56873	7736.75	0.760523	580.565	barge	0.319311
UGA	NH3	ship	9454.77	maritime	2024	base_without_pipeline	2.916	0.538124	0.0496145	3.50374	1137.46	rail	0.140931	7736.75	0.273881	580.565	barge	0.123312
UGA	MeOH	ship	9454.77	maritime	2024	base_without_pipeline	3.46714	0.585111	0.0134548	4.06571	1137.46	rail	0.145595	7736.75	0.30947	580.565	barge	0.130047
UGA	LOHC	ship	9454.77	maritime	2024	base_without_pipeline	3.54853	0.438834	0.0302732	4.01764	1137.46	rail	0.109196	7736.75	0.232102	580.565	barge	0.0975349
UKR	CH2	truck	2070	land	2024	base_without_pipeline	0.263158	6.21	0.801	7.27416
UKR	LH2	truck	2070	land	2024	base_without_pipeline	3.268	1.242	0.3649	4.8749
UKR	LH2	rail	2070	land	2024	base_without_pipeline	3.268	1.035	0.31775	4.62075
UKR	NH3	truck	2070	land	2024	base_without_pipeline	2.916	2.07621	0.0131275	5.00534
UKR	NH3	rail	2070	land	2024	base_without_pipeline	2.916	0.256473	0.0114313	3.1839
UKR	MeOH	truck	2070	land	2024	base_without_pipeline	3.46714	2.1528	0.00356	5.6235
UKR	MeOH	rail	2070	land	2024	base_without_pipeline	3.46714	0.26496	0.0031	3.7352
UKR	LOHC	truck	2070	land	2024	base_without_pipeline	3.54853	1.6146	0.00801	5.17114
UKR	LOHC	rail	2070	land	2024	base_without_pipeline	3.54853	0.19872	0.006975	3.75422
UKR	LH2	ship	3751.38	maritime	2024	base_without_pipeline	3.268	0.631001	0.794516	4.69352	0	none	0	3170.81	0.311691	580.565	barge	0.319311
UKR	NH3	ship	3751.38	maritime	2024	base_without_pipeline	2.916	0.235559	0.0285832	3.18014	0	none	0	3170.81	0.112247	580.565	barge	0.123312
UKR	MeOH	ship	3751.38	maritime	2024	base_without_pipeline	3.46714	0.256879	0.00775137	3.73177	0	none	0	3170.81	0.126832	580.565	barge	0.130047
UKR	LOHC	ship	3751.38	maritime	2024	base_without_pipeline	3.54853	0.192659	0.0174406	3.75863	0	none	0	3170.81	0.0951243	580.565	barge	0.0975349
URY	LH2	ship	13108	maritime	2024	base_without_pipeline	3.268	1.92659	1.75357	6.94816	749.121	truck	0.449473	11778.3	1.15781	580.565	barge	0.319311
URY	NH3	ship	13108	maritime	2024	base_without_pipeline	2.916	1.29163	0.0630857	4.27072	749.121	truck	0.751368	11778.3	0.416952	580.565	barge	0.123312
URY	MeOH	ship	13108	maritime	2024	base_without_pipeline	3.46714	1.38026	0.017108	4.86452	749.121	truck	0.779086	11778.3	0.471132	580.565	barge	0.130047
URY	LOHC	ship	13108	maritime	2024	base_without_pipeline	3.54853	1.0352	0.038493	4.62222	749.121	truck	0.584314	11778.3	0.353349	580.565	barge	0.0975349
USA	LH2	ship	12495.6	maritime	2024	base_without_pipeline	3.268	2.39125	1.6908	7.35005	2242.21	rail	1.12111	9672.82	0.950838	580.565	barge	0.319311
USA	NH3	ship	12495.6	maritime	2024	base_without_pipeline	2.916	0.74354	0.0608275	3.72037	2242.21	rail	0.27781	9672.82	0.342418	580.565	barge	0.123312
USA	MeOH	ship	12495.6	maritime	2024	base_without_pipeline	3.46714	0.803962	0.0164956	4.2876	2242.21	rail	0.287003	9672.82	0.386913	580.565	barge	0.130047
USA	LOHC	ship	12495.6	maritime	2024	base_without_pipeline	3.54853	0.602972	0.0371151	4.18862	2242.21	rail	0.215252	9672.82	0.290185	580.565	barge	0.0975349
UZB	CH2	truck	5721	land	2024	base_without_pipeline	0.263158	17.163	1.8963	19.3225
UZB	LH2	truck	5721	land	2024	base_without_pipeline	3.268	3.4326	0.86387	7.56447
UZB	LH2	rail	5721	land	2024	base_without_pipeline	3.268	2.8605	0.733558	6.86206
UZB	NH3	truck	5721	land	2024	base_without_pipeline	2.916	5.73816	0.0310783	8.68524
UZB	NH3	rail	5721	land	2024	base_without_pipeline	2.916	0.708832	0.0263902	3.65122
UZB	MeOH	truck	5721	land	2024	base_without_pipeline	3.46714	5.94984	0.008428	9.42541
UZB	MeOH	rail	5721	land	2024	base_without_pipeline	3.46714	0.732288	0.00715667	4.20659
UZB	LOHC	truck	5721	land	2024	base_without_pipeline	3.54853	4.46238	0.018963	8.02987
UZB	LOHC	rail	5721	land	2024	base_without_pipeline	3.54853	0.549216	0.0161025	4.11385
UZB	LH2	ship	10938.9	maritime	2024	base_without_pipeline	3.268	2.39519	1.53124	7.19443	2632.95	rail	1.31648	7725.39	0.759406	580.565	barge	0.319311
UZB	NH3	ship	10938.9	maritime	2024	base_without_pipeline	2.916	0.723013	0.0550872	3.6941	2632.95	rail	0.326223	7725.39	0.273479	580.565	barge	0.123312
UZB	MeOH	ship	10938.9	maritime	2024	base_without_pipeline	3.46714	0.77608	0.0149389	4.25816	2632.95	rail	0.337018	7725.39	0.309016	580.565	barge	0.130047
UZB	LOHC	ship	10938.9	maritime	2024	base_without_pipeline	3.54853	0.58206	0.0336125	4.1642	2632.95	rail	0.252763	7725.39	0.231762	580.565	barge	0.0975349
VCT	LH2	ship	7418.5	maritime	2024	base_without_pipeline	3.268	0.99148	1.1704	5.42988	0	none	0	6837.94	0.67217	580.565	barge	0.319311
VCT	NH3	ship	7418.5	maritime	2024	base_without_pipeline	2.916	0.365375	0.0421057	3.32348	0	none	0	6837.94	0.242063	580.565	barge	0.123312
VCT	MeOH	ship	7418.5	maritime	2024	base_without_pipeline	3.46714	0.403564	0.0114185	3.88213	0	none	0	6837.94	0.273518	580.565	barge	0.130047
VCT	LOHC	ship	7418.5	maritime	2024	base_without_pipeline	3.54853	0.302673	0.0256916	3.87689	0	none	0	6837.94	0.205138	580.565	barge	0.0975349
VEN	LH2	ship	8369.6	maritime	2024	base_without_pipeline	3.268	1.18792	1.26788	5.7238	205.187	truck	0.123112	7583.85	0.745492	580.565	barge	0.319311
VEN	NH3	ship	8369.6	maritime	2024	base_without_pipeline	2.916	0.597583	0.0456129	3.5592	205.187	truck	0.205803	7583.85	0.268468	580.565	barge	0.123312
VEN	MeOH	ship	8369.6	maritime	2024	base_without_pipeline	3.46714	0.646795	0.0123696	4.12631	205.187	truck	0.213394	7583.85	0.303354	580.565	barge	0.130047
VEN	LOHC	ship	8369.6	maritime	2024	base_without_pipeline	3.54853	0.485096	0.0278316	4.06146	205.187	truck	0.160046	7583.85	0.227516	580.565	barge	0.0975349
VGB	LH2	ship	7480.45	maritime	2024	base_without_pipeline	3.268	0.99757	1.17675	5.44232	0	none	0	6899.89	0.678259	580.565	barge	0.319311
VGB	NH3	ship	7480.45	maritime	2024	base_without_pipeline	2.916	0.367568	0.0423342	3.3259	0	none	0	6899.89	0.244256	580.565	barge	0.123312
VGB	MeOH	ship	7480.45	maritime	2024	base_without_pipeline	3.46714	0.406042	0.0114805	3.88467	0	none	0	6899.89	0.275996	580.565	barge	0.130047
VGB	LOHC	ship	7480.45	maritime	2024	base_without_pipeline	3.54853	0.304532	0.025831	3.87889	0	none	0	6899.89	0.206997	580.565	barge	0.0975349
VIR	LH2	ship	7512.05	maritime	2024	base_without_pipeline	3.268	1.00068	1.17998	5.44866	0	none	0	6931.48	0.681364	580.565	barge	0.319311
VIR	NH3	ship	7512.05	maritime	2024	base_without_pipeline	2.916	0.368686	0.0424507	3.32714	0	none	0	6931.48	0.245374	580.565	barge	0.123312
VIR	MeOH	ship	7512.05	maritime	2024	base_without_pipeline	3.46714	0.407306	0.011512	3.88596	0	none	0	6931.48	0.277259	580.565	barge	0.130047
VIR	LOHC	ship	7512.05	maritime	2024	base_without_pipeline	3.54853	0.305479	0.0259021	3.87991	0	none	0	6931.48	0.207944	580.565	barge	0.0975349
VNM	LH2	ship	14443.8	maritime	2024	base_without_pipeline	3.268	2.29015	1.89049	7.44864	1513.76	rail	0.75688	12349.5	1.21396	580.565	barge	0.319311
VNM	NH3	ship	14443.8	maritime	2024	base_without_pipeline	2.916	0.748039	0.0680116	3.73205	1513.76	rail	0.187555	12349.5	0.437172	580.565	barge	0.123312
VNM	MeOH	ship	14443.8	maritime	2024	base_without_pipeline	3.46714	0.817788	0.0184438	4.30337	1513.76	rail	0.193761	12349.5	0.49398	580.565	barge	0.130047
VNM	LOHC	ship	14443.8	maritime	2024	base_without_pipeline	3.54853	0.613341	0.0414986	4.20337	1513.76	rail	0.145321	12349.5	0.370485	580.565	barge	0.0975349
VUT	LH2	ship	18909.2	maritime	2024	base_without_pipeline	3.268	2.12101	2.34819	7.7372	0	none	0	18328.6	1.8017	580.565	barge	0.319311
VUT	NH3	ship	18909.2	maritime	2024	base_without_pipeline	2.916	0.772144	0.0844775	3.77262	0	none	0	18328.6	0.648832	580.565	barge	0.123312
VUT	MeOH	ship	18909.2	maritime	2024	base_without_pipeline	3.46714	0.863191	0.0229092	4.35324	0	none	0	18328.6	0.733144	580.565	barge	0.130047
VUT	LOHC	ship	18909.2	maritime	2024	base_without_pipeline	3.54853	0.647393	0.0515456	4.24747	0	none	0	18328.6	0.549858	580.565	barge	0.0975349
WLF	LH2	ship	20163.1	maritime	2024	base_without_pipeline	3.268	2.24427	2.47671	7.98898	0	none	0	19582.5	1.92496	580.565	barge	0.319311
WLF	NH3	ship	20163.1	maritime	2024	base_without_pipeline	2.916	0.816533	0.0891013	3.82163	0	none	0	19582.5	0.693221	580.565	barge	0.123312
WLF	MeOH	ship	20163.1	maritime	2024	base_without_pipeline	3.46714	0.913347	0.0241631	4.40465	0	none	0	19582.5	0.7833	580.565	barge	0.130047
WLF	LOHC	ship	20163.1	maritime	2024	base_without_pipeline	3.54853	0.68501	0.0543669	4.28791	0	none	0	19582.5	0.587475	580.565	barge	0.0975349
WSM	LH2	ship	19721.3	maritime	2024	base_without_pipeline	3.268	2.20084	2.43143	7.90027	0	none	0	19140.7	1.88153	580.565	barge	0.319311
WSM	NH3	ship	19721.3	maritime	2024	base_without_pipeline	2.916	0.800893	0.0874722	3.80436	0	none	0	19140.7	0.677581	580.565	barge	0.123312
WSM	MeOH	ship	19721.3	maritime	2024	base_without_pipeline	3.46714	0.895675	0.0237213	4.38654	0	none	0	19140.7	0.765628	580.565	barge	0.130047
WSM	LOHC	ship	19721.3	maritime	2024	base_without_pipeline	3.54853	0.671756	0.0533728	4.27366	0	none	0	19140.7	0.574221	580.565	barge	0.0975349
YEM	LH2	ship	5601.15	maritime	2024	base_without_pipeline	3.268	0.986141	0.984118	5.23826	345.439	truck	0.207263	4675.15	0.459567	580.565	barge	0.319311
YEM	NH3	ship	5601.15	maritime	2024	base_without_pipeline	2.916	0.635288	0.0354043	3.58669	345.439	truck	0.346475	4675.15	0.1655	580.565	barge	0.123312
YEM	MeOH	ship	5601.15	maritime	2024	base_without_pipeline	3.46714	0.676309	0.00960115	4.15305	345.439	truck	0.359257	4675.15	0.187006	580.565	barge	0.130047
YEM	LOHC	ship	5601.15	maritime	2024	base_without_pipeline	3.54853	0.507232	0.0216026	4.07736	345.439	truck	0.269442	4675.15	0.140255	580.565	barge	0.0975349
ZAF	LH2	ship	12123.6	maritime	2024	base_without_pipeline	3.268	1.76988	1.65267	6.69055	629.633	truck	0.37778	10913.4	1.07279	580.565	barge	0.319311
ZAF	NH3	ship	12123.6	maritime	2024	base_without_pipeline	2.916	1.14117	0.0594558	4.11662	629.633	truck	0.631522	10913.4	0.386334	580.565	barge	0.123312
ZAF	MeOH	ship	12123.6	maritime	2024	base_without_pipeline	3.46714	1.2214	0.0161236	4.70467	629.633	truck	0.654818	10913.4	0.436536	580.565	barge	0.130047
ZAF	LOHC	ship	12123.6	maritime	2024	base_without_pipeline	3.54853	0.916051	0.0362781	4.50086	629.633	truck	0.491114	10913.4	0.327402	580.565	barge	0.0975349
ZMB	CH2	truck	11565.8	land	2024	base_without_pipeline	0.263158	34.6974	3.64974	38.6103
ZMB	LH2	truck	11565.8	land	2024	base_without_pipeline	3.268	6.93948	1.66266	11.8701
ZMB	LH2	rail	11565.8	land	2024	base_without_pipeline	3.268	5.7829	1.39922	10.4501
ZMB	NH3	truck	11565.8	land	2024	base_without_pipeline	2.916	11.6005	0.0598152	14.5763
ZMB	NH3	rail	11565.8	land	2024	base_without_pipeline	2.916	1.433	0.0503377	4.39934
ZMB	MeOH	truck	11565.8	land	2024	base_without_pipeline	3.46714	12.0284	0.0162211	15.5118
ZMB	MeOH	rail	11565.8	land	2024	base_without_pipeline	3.46714	1.48042	0.0136509	4.96122
ZMB	LOHC	truck	11565.8	land	2024	base_without_pipeline	3.54853	9.02132	0.0364974	12.6064
ZMB	LOHC	rail	11565.8	land	2024	base_without_pipeline	3.54853	1.11032	0.0307145	4.68956
ZMB	LH2	ship	12895.4	maritime	2024	base_without_pipeline	3.268	2.23548	1.73178	7.23526	1756.57	rail	0.878285	10558.3	1.03788	580.565	barge	0.319311
ZMB	NH3	ship	12895.4	maritime	2024	base_without_pipeline	2.916	0.714715	0.0623019	3.69302	1756.57	rail	0.217639	10558.3	0.373764	580.565	barge	0.123312
ZMB	MeOH	ship	12895.4	maritime	2024	base_without_pipeline	3.46714	0.77722	0.0168954	4.26126	1756.57	rail	0.224841	10558.3	0.422332	580.565	barge	0.130047
ZMB	LOHC	ship	12895.4	maritime	2024	base_without_pipeline	3.54853	0.582915	0.0380147	4.16946	1756.57	rail	0.168631	10558.3	0.316749	580.565	barge	0.0975349
ZWE	CH2	truck	12037.1	land	2024	base_without_pipeline	0.263158	36.1113	3.79113	40.1656
ZWE	LH2	truck	12037.1	land	2024	base_without_pipeline	3.268	7.22226	1.72707	12.2173
ZWE	LH2	rail	12037.1	land	2024	base_without_pipeline	3.268	6.01855	1.45289	10.7394
ZWE	NH3	truck	12037.1	land	2024	base_without_pipeline	2.916	12.0732	0.0621324	15.0513
ZWE	NH3	rail	12037.1	land	2024	base_without_pipeline	2.916	1.4914	0.0522687	4.45967
ZWE	MeOH	truck	12037.1	land	2024	base_without_pipeline	3.46714	12.5186	0.0168495	16.0026
ZWE	MeOH	rail	12037.1	land	2024	base_without_pipeline	3.46714	1.54075	0.0141746	5.02207
ZWE	LOHC	truck	12037.1	land	2024	base_without_pipeline	3.54853	9.38894	0.0379113	12.9754
ZWE	LOHC	rail	12037.1	land	2024	base_without_pipeline	3.54853	1.15556	0.0318927	4.73598
ZWE	LH2	ship	12440	maritime	2024	base_without_pipeline	3.268	2.00778	1.6851	6.96088	1301.17	rail	0.650585	10558.3	1.03788	580.565	barge	0.319311
ZWE	NH3	ship	12440	maritime	2024	base_without_pipeline	2.916	0.658291	0.0606226	3.63491	1301.17	rail	0.161215	10558.3	0.373764	580.565	barge	0.123312
ZWE	MeOH	ship	12440	maritime	2024	base_without_pipeline	3.46714	0.718928	0.01644	4.20251	1301.17	rail	0.16655	10558.3	0.422332	580.565	barge	0.130047
ZWE	LOHC	ship	12440	maritime	2024	base_without_pipeline	3.54853	0.539196	0.0369901	4.12472	1301.17	rail	0.124912	10558.3	0.316749	580.565	barge	0.0975349
ABW	LH2	ship	8265.99	maritime	2024	base_with_pipeline	3.268	1.07479	1.25726	5.60005	0	none	0	7685.42	0.755477	580.565	barge	0.319311
ABW	NH3	ship	8265.99	maritime	2024	base_with_pipeline	2.916	0.395376	0.0452308	3.35661	0	none	0	7685.42	0.272064	580.565	barge	0.123312
ABW	MeOH	ship	8265.99	maritime	2024	base_with_pipeline	3.46714	0.437463	0.012266	3.91687	0	none	0	7685.42	0.307417	580.565	barge	0.130047
ABW	LOHC	ship	8265.99	maritime	2024	base_with_pipeline	3.54853	0.328098	0.0275985	3.90423	0	none	0	7685.42	0.230563	580.565	barge	0.0975349
AFG	CH2	truck	6450.25	land	2024	base_with_pipeline	0.263158	19.3508	2.11508	21.729
AFG	CH2	pipeline	6450.25	land	2024	base_with_pipeline	0.263158	1.93508	1.20942	3.40765
AFG	LH2	truck	6450.25	land	2024	base_with_pipeline	3.268	3.87015	0.963534	8.10168
AFG	LH2	rail	6450.25	land	2024	base_with_pipeline	3.268	3.22512	0.816612	7.30974
AFG	NH3	truck	6450.25	land	2024	base_with_pipeline	2.916	6.4696	0.0346637	9.42026
AFG	NH3	rail	6450.25	land	2024	base_with_pipeline	2.916	0.799186	0.0293781	3.74456
AFG	MeOH	truck	6450.25	land	2024	base_with_pipeline	3.46714	6.70826	0.00940033	10.1848
AFG	MeOH	rail	6450.25	land	2024	base_with_pipeline	3.46714	0.825632	0.00796694	4.30074
AFG	LOHC	truck	6450.25	land	2024	base_with_pipeline	3.54853	5.03119	0.0211507	8.60088
AFG	LOHC	rail	6450.25	land	2024	base_with_pipeline	3.54853	0.619224	0.0179256	4.18568
AFG	LH2	ship	9777.26	maritime	2024	base_with_pipeline	3.268	1.81437	1.41217	6.49454	1471.3	rail	0.73565	7725.39	0.759406	580.565	barge	0.319311
AFG	NH3	ship	9777.26	maritime	2024	base_with_pipeline	2.916	0.579085	0.0508036	3.54589	1471.3	rail	0.182294	7725.39	0.273479	580.565	barge	0.123312
AFG	MeOH	ship	9777.26	maritime	2024	base_with_pipeline	3.46714	0.627389	0.0137773	4.10831	1471.3	rail	0.188326	7725.39	0.309016	580.565	barge	0.130047
AFG	LOHC	ship	9777.26	maritime	2024	base_with_pipeline	3.54853	0.470541	0.0309988	4.05007	1471.3	rail	0.141245	7725.39	0.231762	580.565	barge	0.0975349
AGO	LH2	ship	10487.3	maritime	2024	base_with_pipeline	3.268	1.76883	1.48495	6.52178	1184.17	rail	0.592085	8722.58	0.85743	580.565	barge	0.319311
AGO	NH3	ship	10487.3	maritime	2024	base_with_pipeline	2.916	0.57881	0.053422	3.54823	1184.17	rail	0.146719	8722.58	0.308779	580.565	barge	0.123312
AGO	MeOH	ship	10487.3	maritime	2024	base_with_pipeline	3.46714	0.630524	0.0144873	4.11215	1184.17	rail	0.151574	8722.58	0.348903	580.565	barge	0.130047
AGO	LOHC	ship	10487.3	maritime	2024	base_with_pipeline	3.54853	0.472893	0.0325965	4.05402	1184.17	rail	0.11368	8722.58	0.261677	580.565	barge	0.0975349
AIA	LH2	ship	7365.65	maritime	2024	base_with_pipeline	3.268	0.986284	1.16498	5.41926	0	none	0	6785.08	0.666973	580.565	barge	0.319311
AIA	NH3	ship	7365.65	maritime	2024	base_with_pipeline	2.916	0.363504	0.0419108	3.32141	0	none	0	6785.08	0.240192	580.565	barge	0.123312
AIA	MeOH	ship	7365.65	maritime	2024	base_with_pipeline	3.46714	0.40145	0.0113656	3.87996	0	none	0	6785.08	0.271403	580.565	barge	0.130047
AIA	LOHC	ship	7365.65	maritime	2024	base_with_pipeline	3.54853	0.301087	0.0255727	3.87519	0	none	0	6785.08	0.203552	580.565	barge	0.0975349
ALB	CH2	truck	1800	land	2024	base_with_pipeline	0.263158	5.4	0.72	6.38316
ALB	CH2	pipeline	1800	land	2024	base_with_pipeline	0.263158	0.54	0.3375	1.14066
ALB	LH2	truck	1800	land	2024	base_with_pipeline	3.268	1.08	0.328	4.676
ALB	LH2	rail	1800	land	2024	base_with_pipeline	3.268	0.9	0.287	4.455
ALB	NH3	truck	1800	land	2024	base_with_pipeline	2.916	1.8054	0.0118	4.7332
ALB	NH3	rail	1800	land	2024	base_with_pipeline	2.916	0.22302	0.010325	3.14934
ALB	MeOH	truck	1800	land	2024	base_with_pipeline	3.46714	1.872	0.0032	5.34234
ALB	MeOH	rail	1800	land	2024	base_with_pipeline	3.46714	0.2304	0.0028	3.70034
ALB	LOHC	truck	1800	land	2024	base_with_pipeline	3.54853	1.404	0.0072	4.95973
ALB	LOHC	rail	1800	land	2024	base_with_pipeline	3.54853	0.1728	0.0063	3.72763
ALB	LH2	ship	2226.95	maritime	2024	base_with_pipeline	3.268	0.605548	0.638262	4.51181	247.952	truck	0.148771	1398.43	0.137466	580.565	barge	0.319311
ALB	NH3	ship	2226.95	maritime	2024	base_with_pipeline	2.916	0.421512	0.0229619	3.36047	247.952	truck	0.248696	1398.43	0.0495044	580.565	barge	0.123312
ALB	MeOH	ship	2226.95	maritime	2024	base_with_pipeline	3.46714	0.443854	0.00622695	3.91722	247.952	truck	0.25787	1398.43	0.0559372	580.565	barge	0.130047
ALB	LOHC	ship	2226.95	maritime	2024	base_with_pipeline	3.54853	0.33289	0.0140106	3.89543	247.952	truck	0.193403	1398.43	0.0419529	580.565	barge	0.0975349
AND	CH2	truck	890.343	land	2024	base_with_pipeline	0.263158	2.67103	0.447103	3.38129
AND	CH2	pipeline	890.343	land	2024	base_with_pipeline	0.263158	0.267103	0.166939	0.6972
AND	LH2	truck	890.343	land	2024	base_with_pipeline	3.268	0.534206	0.20368	4.00589
AND	LH2	rail	890.343	land	2024	base_with_pipeline	3.268	0.445171	0.1834	3.89657
AND	NH3	truck	890.343	land	2024	base_with_pipeline	2.916	0.893014	0.00732752	3.81634
AND	NH3	rail	890.343	land	2024	base_with_pipeline	2.916	0.110313	0.00659793	3.03291
AND	MeOH	truck	890.343	land	2024	base_with_pipeline	3.46714	0.925957	0.00198712	4.39509
AND	MeOH	rail	890.343	land	2024	base_with_pipeline	3.46714	0.113964	0.00178927	3.5829
AND	LOHC	truck	890.343	land	2024	base_with_pipeline	3.54853	0.694468	0.00447103	4.24747
AND	LOHC	rail	890.343	land	2024	base_with_pipeline	3.54853	0.0854729	0.00402586	3.63803
ANT	LH2	ship	7357.36	maritime	2024	base_with_pipeline	3.268	0.98547	1.16413	5.4176	0	none	0	6776.8	0.666159	580.565	barge	0.319311
ANT	NH3	ship	7357.36	maritime	2024	base_with_pipeline	2.916	0.363211	0.0418803	3.32109	0	none	0	6776.8	0.239899	580.565	barge	0.123312
ANT	MeOH	ship	7357.36	maritime	2024	base_with_pipeline	3.46714	0.401119	0.0113574	3.87962	0	none	0	6776.8	0.271072	580.565	barge	0.130047
ANT	LOHC	ship	7357.36	maritime	2024	base_with_pipeline	3.54853	0.300839	0.0255541	3.87492	0	none	0	6776.8	0.203304	580.565	barge	0.0975349
ARE	LH2	ship	8393.99	maritime	2024	base_with_pipeline	3.268	1.20249	1.27038	5.74088	229.463	truck	0.137678	7583.96	0.745503	580.565	barge	0.319311
ARE	NH3	ship	8393.99	maritime	2024	base_with_pipeline	2.916	0.621936	0.0457028	3.58364	229.463	truck	0.230151	7583.96	0.268472	580.565	barge	0.123312
ARE	MeOH	ship	8393.99	maritime	2024	base_with_pipeline	3.46714	0.672046	0.012394	4.15158	229.463	truck	0.238642	7583.96	0.303358	580.565	barge	0.130047
ARE	LOHC	ship	8393.99	maritime	2024	base_with_pipeline	3.54853	0.504035	0.0278865	4.08045	229.463	truck	0.178981	7583.96	0.227519	580.565	barge	0.0975349
ARG	LH2	ship	15515.5	maritime	2024	base_with_pipeline	3.268	2.48566	2.00034	7.75399	1738.22	rail	0.86911	13196.7	1.29724	580.565	barge	0.319311
ARG	NH3	ship	15515.5	maritime	2024	base_with_pipeline	2.916	0.805841	0.0719634	3.7938	1738.22	rail	0.215365	13196.7	0.467163	580.565	barge	0.123312
ARG	MeOH	ship	15515.5	maritime	2024	base_with_pipeline	3.46714	0.880407	0.0195155	4.36707	1738.22	rail	0.222492	13196.7	0.527868	580.565	barge	0.130047
ARG	LOHC	ship	15515.5	maritime	2024	base_with_pipeline	3.54853	0.660305	0.0439098	4.25274	1738.22	rail	0.166869	13196.7	0.395901	580.565	barge	0.0975349
ARM	CH2	truck	3923.06	land	2024	base_with_pipeline	0.263158	11.7692	1.35692	13.3893
ARM	CH2	pipeline	3923.06	land	2024	base_with_pipeline	0.263158	1.17692	0.735574	2.17565
ARM	LH2	truck	3923.06	land	2024	base_with_pipeline	3.268	2.35384	0.618152	6.23999
ARM	LH2	rail	3923.06	land	2024	base_with_pipeline	3.268	1.96153	0.528793	5.75832
ARM	NH3	truck	3923.06	land	2024	base_with_pipeline	2.916	3.93483	0.0222384	6.87307
ARM	NH3	rail	3923.06	land	2024	base_with_pipeline	2.916	0.486067	0.0190236	3.42109
ARM	MeOH	truck	3923.06	land	2024	base_with_pipeline	3.46714	4.07998	0.00603075	7.55316
ARM	MeOH	rail	3923.06	land	2024	base_with_pipeline	3.46714	0.502152	0.00515896	3.97445
ARM	LOHC	truck	3923.06	land	2024	base_with_pipeline	3.54853	3.05999	0.0135692	6.62209
ARM	LOHC	rail	3923.06	land	2024	base_with_pipeline	3.54853	0.376614	0.0116077	3.93675
ARM	LH2	ship	4928.24	maritime	2024	base_with_pipeline	3.268	1.15727	0.915144	5.34041	818.374	truck	0.491024	3529.3	0.34693	580.565	barge	0.319311
ARM	NH3	ship	4928.24	maritime	2024	base_with_pipeline	2.916	1.06908	0.0329229	4.018	818.374	truck	0.820829	3529.3	0.124937	580.565	barge	0.123312
ARM	MeOH	ship	4928.24	maritime	2024	base_with_pipeline	3.46714	1.12233	0.00892824	4.5984	818.374	truck	0.851109	3529.3	0.141172	580.565	barge	0.130047
ARM	LOHC	ship	4928.24	maritime	2024	base_with_pipeline	3.54853	0.841746	0.0200885	4.41036	818.374	truck	0.638332	3529.3	0.105879	580.565	barge	0.0975349
ASM	LH2	ship	19652.6	maritime	2024	base_with_pipeline	3.268	2.19409	2.42439	7.88648	0	none	0	19072	1.87478	580.565	barge	0.319311
ASM	NH3	ship	19652.6	maritime	2024	base_with_pipeline	2.916	0.798461	0.0872188	3.80168	0	none	0	19072	0.675149	580.565	barge	0.123312
ASM	MeOH	ship	19652.6	maritime	2024	base_with_pipeline	3.46714	0.892927	0.0236526	4.38372	0	none	0	19072	0.76288	580.565	barge	0.130047
ASM	LOHC	ship	19652.6	maritime	2024	base_with_pipeline	3.54853	0.669695	0.0532183	4.27144	0	none	0	19072	0.57216	580.565	barge	0.0975349
ATG	LH2	ship	7268.51	maritime	2024	base_with_pipeline	3.268	0.976736	1.15502	5.39976	0	none	0	6687.95	0.657425	580.565	barge	0.319311
ATG	NH3	ship	7268.51	maritime	2024	base_with_pipeline	2.916	0.360065	0.0415526	3.31762	0	none	0	6687.95	0.236753	580.565	barge	0.123312
ATG	MeOH	ship	7268.51	maritime	2024	base_with_pipeline	3.46714	0.397565	0.0112685	3.87598	0	none	0	6687.95	0.267518	580.565	barge	0.130047
ATG	LOHC	ship	7268.51	maritime	2024	base_with_pipeline	3.54853	0.298173	0.0253542	3.87206	0	none	0	6687.95	0.200638	580.565	barge	0.0975349
AUS	LH2	ship	18073.8	maritime	2024	base_with_pipeline	3.268	2.35881	2.26257	7.88937	637.649	truck	0.382589	16855.6	1.65691	580.565	barge	0.319311
AUS	NH3	ship	18073.8	maritime	2024	base_with_pipeline	2.916	1.35956	0.0813972	4.35696	637.649	truck	0.639562	16855.6	0.596688	580.565	barge	0.123312
AUS	MeOH	ship	18073.8	maritime	2024	base_with_pipeline	3.46714	1.46743	0.0220738	4.95664	637.649	truck	0.663155	16855.6	0.674224	580.565	barge	0.130047
AUS	LOHC	ship	18073.8	maritime	2024	base_with_pipeline	3.54853	1.10057	0.0496661	4.69876	637.649	truck	0.497366	16855.6	0.505668	580.565	barge	0.0975349
AUT	CH2	truck	825	land	2024	base_with_pipeline	0.263158	2.475	0.4275	3.16566
AUT	CH2	pipeline	825	land	2024	base_with_pipeline	0.263158	0.2475	0.154688	0.665345
AUT	LH2	truck	825	land	2024	base_with_pipeline	3.268	0.495	0.19475	3.95775
AUT	LH2	rail	825	land	2024	base_with_pipeline	3.268	0.4125	0.175958	3.85646
AUT	LH2	barge	825	land	2024	base_with_pipeline	3.268	0.45375	0.386937	4.10869
AUT	NH3	truck	825	land	2024	base_with_pipeline	2.916	0.827475	0.00700625	3.75048
AUT	NH3	rail	825	land	2024	base_with_pipeline	2.916	0.102218	0.00633021	3.02455
AUT	NH3	barge	825	land	2024	base_with_pipeline	2.916	0.17523	0.0139203	3.10515
AUT	MeOH	truck	825	land	2024	base_with_pipeline	3.46714	0.858	0.0019	4.32704
AUT	MeOH	rail	825	land	2024	base_with_pipeline	3.46714	0.1056	0.00171667	3.57446
AUT	MeOH	barge	825	land	2024	base_with_pipeline	3.46714	0.1848	0.003775	3.65572
AUT	LOHC	truck	825	land	2024	base_with_pipeline	3.54853	0.6435	0.004275	4.1963
AUT	LOHC	rail	825	land	2024	base_with_pipeline	3.54853	0.0792	0.0038625	3.63159
AUT	LOHC	barge	825	land	2024	base_with_pipeline	3.54853	0.1386	0.00849375	3.69562
AZE	CH2	truck	4195.68	land	2024	base_with_pipeline	0.263158	12.587	1.4387	14.2889
AZE	CH2	pipeline	4195.68	land	2024	base_with_pipeline	0.263158	1.2587	0.78669	2.30855
AZE	LH2	truck	4195.68	land	2024	base_with_pipeline	3.268	2.51741	0.65541	6.44082
AZE	LH2	rail	4195.68	land	2024	base_with_pipeline	3.268	2.09784	0.559841	5.92568
AZE	NH3	truck	4195.68	land	2024	base_with_pipeline	2.916	4.20827	0.0235788	7.14785
AZE	NH3	rail	4195.68	land	2024	base_with_pipeline	2.916	0.519845	0.0201406	3.45599
AZE	MeOH	truck	4195.68	land	2024	base_with_pipeline	3.46714	4.36351	0.00639424	7.83704
AZE	MeOH	rail	4195.68	land	2024	base_with_pipeline	3.46714	0.537047	0.00546187	4.00965
AZE	LOHC	truck	4195.68	land	2024	base_with_pipeline	3.54853	3.27263	0.014387	6.83555
AZE	LOHC	rail	4195.68	land	2024	base_with_pipeline	3.54853	0.402785	0.0122892	3.9636
AZE	LH2	ship	5306.93	maritime	2024	base_with_pipeline	3.268	1.26477	0.95396	5.48673	1197.06	rail	0.59853	3529.3	0.34693	580.565	barge	0.319311
AZE	NH3	ship	5306.93	maritime	2024	base_with_pipeline	2.916	0.396565	0.0343193	3.34688	1197.06	rail	0.148316	3529.3	0.124937	580.565	barge	0.123312
AZE	MeOH	ship	5306.93	maritime	2024	base_with_pipeline	3.46714	0.424442	0.00930693	3.90089	1197.06	rail	0.153224	3529.3	0.141172	580.565	barge	0.130047
AZE	LOHC	ship	5306.93	maritime	2024	base_with_pipeline	3.54853	0.318332	0.0209406	3.8878	1197.06	rail	0.114918	3529.3	0.105879	580.565	barge	0.0975349
BDI	CH2	truck	9731.92	land	2024	base_with_pipeline	0.263158	29.1958	3.09958	32.5585
BDI	CH2	pipeline	9731.92	land	2024	base_with_pipeline	0.263158	2.91958	1.82473	5.00747
BDI	LH2	truck	9731.92	land	2024	base_with_pipeline	3.268	5.83915	1.41203	10.5192
BDI	LH2	rail	9731.92	land	2024	base_with_pipeline	3.268	4.86596	1.19036	9.32432
BDI	NH3	truck	9731.92	land	2024	base_with_pipeline	2.916	9.76112	0.0507986	12.7279
BDI	NH3	rail	9731.92	land	2024	base_with_pipeline	2.916	1.20578	0.0428238	4.16461
BDI	MeOH	truck	9731.92	land	2024	base_with_pipeline	3.46714	10.1212	0.0137759	13.6021
BDI	MeOH	rail	9731.92	land	2024	base_with_pipeline	3.46714	1.24569	0.0116132	4.72444
BDI	LOHC	truck	9731.92	land	2024	base_with_pipeline	3.54853	7.5909	0.0309958	11.1704
BDI	LOHC	rail	9731.92	land	2024	base_with_pipeline	3.54853	0.934264	0.0261298	4.50892
BDI	LH2	ship	9992.07	maritime	2024	base_with_pipeline	3.268	1.79291	1.43419	6.4951	1365.32	rail	0.68266	8046.18	0.790939	580.565	barge	0.319311
BDI	NH3	ship	9992.07	maritime	2024	base_with_pipeline	2.916	0.57731	0.0515957	3.54491	1365.32	rail	0.169163	8046.18	0.284835	580.565	barge	0.123312
BDI	MeOH	ship	9992.07	maritime	2024	base_with_pipeline	3.46714	0.626655	0.0139921	4.10779	1365.32	rail	0.174761	8046.18	0.321847	580.565	barge	0.130047
BDI	LOHC	ship	9992.07	maritime	2024	base_with_pipeline	3.54853	0.469991	0.0314821	4.05	1365.32	rail	0.131071	8046.18	0.241385	580.565	barge	0.0975349
BEL	CH2	truck	560	land	2024	base_with_pipeline	0.263158	1.68	0.348	2.29116
BEL	CH2	pipeline	560	land	2024	base_with_pipeline	0.263158	0.168	0.105	0.536158
BEL	LH2	truck	560	land	2024	base_with_pipeline	3.268	0.336	0.158533	3.76253
BEL	LH2	rail	560	land	2024	base_with_pipeline	3.268	0.28	0.145778	3.69378
BEL	LH2	barge	560	land	2024	base_with_pipeline	3.268	0.308	0.341667	3.91767
BEL	NH3	truck	560	land	2024	base_with_pipeline	2.916	0.56168	0.00570333	3.48338
BEL	NH3	rail	560	land	2024	base_with_pipeline	2.916	0.069384	0.00524444	2.99063
BEL	NH3	barge	560	land	2024	base_with_pipeline	2.916	0.118944	0.0122917	3.04724
BEL	MeOH	truck	560	land	2024	base_with_pipeline	3.46714	0.5824	0.00154667	4.05109
BEL	MeOH	rail	560	land	2024	base_with_pipeline	3.46714	0.07168	0.00142222	3.54025
BEL	MeOH	barge	560	land	2024	base_with_pipeline	3.46714	0.12544	0.00333333	3.59592
BEL	LOHC	truck	560	land	2024	base_with_pipeline	3.54853	0.4368	0.00348	3.98881
BEL	LOHC	rail	560	land	2024	base_with_pipeline	3.54853	0.05376	0.0032	3.60549
BEL	LOHC	barge	560	land	2024	base_with_pipeline	3.54853	0.09408	0.0075	3.65011
BEL	LH2	ship	4226.1	maritime	2024	base_with_pipeline	3.268	0.743711	0.843176	4.85489	131.64	truck	0.078984	3513.9	0.345416	580.565	barge	0.319311
BEL	NH3	ship	4226.1	maritime	2024	base_with_pipeline	2.916	0.379739	0.0303338	3.32607	131.64	truck	0.132035	3513.9	0.124392	580.565	barge	0.123312
BEL	MeOH	ship	4226.1	maritime	2024	base_with_pipeline	3.46714	0.407508	0.00822611	3.88288	131.64	truck	0.136906	3513.9	0.140556	580.565	barge	0.130047
BEL	LOHC	ship	4226.1	maritime	2024	base_with_pipeline	3.54853	0.305631	0.0185087	3.87267	131.64	truck	0.102679	3513.9	0.105417	580.565	barge	0.0975349
BEN	LH2	ship	7394.06	maritime	2024	base_with_pipeline	3.268	1.02927	1.16789	5.46516	80.1127	truck	0.0480676	6733.38	0.661891	580.565	barge	0.319311
BEN	NH3	ship	7394.06	maritime	2024	base_with_pipeline	2.916	0.442027	0.0420156	3.40004	80.1127	truck	0.080353	6733.38	0.238362	580.565	barge	0.123312
BEN	MeOH	ship	7394.06	maritime	2024	base_with_pipeline	3.46714	0.482699	0.0113941	3.96124	80.1127	truck	0.0833172	6733.38	0.269335	580.565	barge	0.130047
BEN	LOHC	ship	7394.06	maritime	2024	base_with_pipeline	3.54853	0.362024	0.0256366	3.93619	80.1127	truck	0.0624879	6733.38	0.202001	580.565	barge	0.0975349
BFA	CH2	truck	10128.7	land	2024	base_with_pipeline	0.263158	30.3861	3.21861	33.8679
BFA	CH2	pipeline	10128.7	land	2024	base_with_pipeline	0.263158	3.03861	1.89913	5.2009
BFA	LH2	truck	10128.7	land	2024	base_with_pipeline	3.268	6.07722	1.46626	10.8115
BFA	LH2	rail	10128.7	land	2024	base_with_pipeline	3.268	5.06435	1.23555	9.5679
BFA	NH3	truck	10128.7	land	2024	base_with_pipeline	2.916	10.1591	0.0527494	13.1278
BFA	NH3	rail	10128.7	land	2024	base_with_pipeline	2.916	1.25495	0.0444495	4.2154
BFA	MeOH	truck	10128.7	land	2024	base_with_pipeline	3.46714	10.5338	0.0143049	14.0153
BFA	MeOH	rail	10128.7	land	2024	base_with_pipeline	3.46714	1.29647	0.0120541	4.77567
BFA	LOHC	truck	10128.7	land	2024	base_with_pipeline	3.54853	7.90039	0.0321861	11.4811
BFA	LOHC	rail	10128.7	land	2024	base_with_pipeline	3.54853	0.972355	0.0271218	4.54801
BFA	LH2	ship	8200.97	maritime	2024	base_with_pipeline	3.268	1.55576	1.2506	6.07436	971.421	truck	0.582853	6648.98	0.653595	580.565	barge	0.319311
BFA	NH3	ship	8200.97	maritime	2024	base_with_pipeline	2.916	1.33302	0.0449911	4.29401	971.421	truck	0.974335	6648.98	0.235374	580.565	barge	0.123312
BFA	MeOH	ship	8200.97	maritime	2024	base_with_pipeline	3.46714	1.40628	0.012201	4.88563	971.421	truck	1.01028	6648.98	0.265959	580.565	barge	0.130047
BFA	LOHC	ship	8200.97	maritime	2024	base_with_pipeline	3.54853	1.05471	0.0274522	4.63069	971.421	truck	0.757708	6648.98	0.199469	580.565	barge	0.0975349
BGD	LH2	ship	12189.5	maritime	2024	base_with_pipeline	3.268	1.96016	1.65943	6.88758	995.978	truck	0.597587	10613	1.04326	580.565	barge	0.319311
BGD	NH3	ship	12189.5	maritime	2024	base_with_pipeline	2.916	1.49798	0.0596989	4.47368	995.978	truck	0.998966	10613	0.3757	580.565	barge	0.123312
BGD	MeOH	ship	12189.5	maritime	2024	base_with_pipeline	3.46714	1.59038	0.0161895	5.07372	995.978	truck	1.03582	10613	0.42452	580.565	barge	0.130047
BGD	LOHC	ship	12189.5	maritime	2024	base_with_pipeline	3.54853	1.19279	0.0364265	4.77774	995.978	truck	0.776863	10613	0.31839	580.565	barge	0.0975349
BGR	CH2	truck	1540	land	2024	base_with_pipeline	0.263158	4.62	0.642	5.52516
BGR	CH2	pipeline	1540	land	2024	base_with_pipeline	0.263158	0.462	0.28875	1.01391
BGR	LH2	truck	1540	land	2024	base_with_pipeline	3.268	0.924	0.292467	4.48447
BGR	LH2	rail	1540	land	2024	base_with_pipeline	3.268	0.77	0.257389	4.29539
BGR	NH3	truck	1540	land	2024	base_with_pipeline	2.916	1.54462	0.0105217	4.47114
BGR	NH3	rail	1540	land	2024	base_with_pipeline	2.916	0.190806	0.00925972	3.11607
BGR	MeOH	truck	1540	land	2024	base_with_pipeline	3.46714	1.6016	0.00285333	5.0716
BGR	MeOH	rail	1540	land	2024	base_with_pipeline	3.46714	0.19712	0.00251111	3.66677
BGR	LOHC	truck	1540	land	2024	base_with_pipeline	3.54853	1.2012	0.00642	4.75615
BGR	LOHC	rail	1540	land	2024	base_with_pipeline	3.54853	0.14784	0.00565	3.70202
BGR	LH2	ship	3613.72	maritime	2024	base_with_pipeline	3.268	0.84381	0.780406	4.89222	451.146	truck	0.270688	2582.01	0.253812	580.565	barge	0.319311
BGR	NH3	ship	3613.72	maritime	2024	base_with_pipeline	2.916	0.667215	0.0280756	3.61129	451.146	truck	0.452499	2582.01	0.0914032	580.565	barge	0.123312
BGR	MeOH	ship	3613.72	maritime	2024	base_with_pipeline	3.46714	0.702519	0.00761372	4.17728	451.146	truck	0.469192	2582.01	0.10328	580.565	barge	0.130047
BGR	LOHC	ship	3613.72	maritime	2024	base_with_pipeline	3.54853	0.526889	0.0171309	4.09255	451.146	truck	0.351894	2582.01	0.0774603	580.565	barge	0.0975349
BHR	LH2	ship	8627.05	maritime	2024	base_with_pipeline	3.268	1.11028	1.29427	5.67255	0	none	0	8046.48	0.790969	580.565	barge	0.319311
BHR	NH3	ship	8627.05	maritime	2024	base_with_pipeline	2.916	0.408157	0.0465622	3.37072	0	none	0	8046.48	0.284845	580.565	barge	0.123312
BHR	MeOH	ship	8627.05	maritime	2024	base_with_pipeline	3.46714	0.451906	0.012627	3.93168	0	none	0	8046.48	0.321859	580.565	barge	0.130047
BHR	LOHC	ship	8627.05	maritime	2024	base_with_pipeline	3.54853	0.338929	0.0284109	3.91587	0	none	0	8046.48	0.241394	580.565	barge	0.0975349
BHS	LH2	ship	8441.42	maritime	2024	base_with_pipeline	3.268	1.09203	1.27525	5.63528	0	none	0	7860.86	0.772723	580.565	barge	0.319311
BHS	NH3	ship	8441.42	maritime	2024	base_with_pipeline	2.916	0.401586	0.0458778	3.36346	0	none	0	7860.86	0.278274	580.565	barge	0.123312
BHS	MeOH	ship	8441.42	maritime	2024	base_with_pipeline	3.46714	0.444481	0.0124414	3.92407	0	none	0	7860.86	0.314434	580.565	barge	0.130047
BHS	LOHC	ship	8441.42	maritime	2024	base_with_pipeline	3.54853	0.333361	0.0279932	3.90988	0	none	0	7860.86	0.235826	580.565	barge	0.0975349
BIH	CH2	truck	1270	land	2024	base_with_pipeline	0.263158	3.81	0.561	4.63416
BIH	CH2	pipeline	1270	land	2024	base_with_pipeline	0.263158	0.381	0.238125	0.882283
BIH	LH2	truck	1270	land	2024	base_with_pipeline	3.268	0.762	0.255567	4.28557
BIH	LH2	rail	1270	land	2024	base_with_pipeline	3.268	0.635	0.226639	4.12964
BIH	NH3	truck	1270	land	2024	base_with_pipeline	2.916	1.27381	0.00919417	4.199
BIH	NH3	rail	1270	land	2024	base_with_pipeline	2.916	0.157353	0.00815347	3.08151
BIH	MeOH	truck	1270	land	2024	base_with_pipeline	3.46714	1.3208	0.00249333	4.79044
BIH	MeOH	rail	1270	land	2024	base_with_pipeline	3.46714	0.16256	0.00221111	3.63191
BIH	LOHC	truck	1270	land	2024	base_with_pipeline	3.54853	0.9906	0.00561	4.54474
BIH	LOHC	rail	1270	land	2024	base_with_pipeline	3.54853	0.12192	0.004975	3.67542
BIH	LH2	ship	2420.04	maritime	2024	base_with_pipeline	3.268	0.598854	0.658054	4.52491	196.777	truck	0.118066	1642.7	0.161477	580.565	barge	0.319311
BIH	NH3	ship	2420.04	maritime	2024	base_with_pipeline	2.916	0.378831	0.0236739	3.3185	196.777	truck	0.197367	1642.7	0.0581516	580.565	barge	0.123312
BIH	MeOH	ship	2420.04	maritime	2024	base_with_pipeline	3.46714	0.400403	0.00642004	3.87397	196.777	truck	0.204648	1642.7	0.065708	580.565	barge	0.130047
BIH	LOHC	ship	2420.04	maritime	2024	base_with_pipeline	3.54853	0.300302	0.0144451	3.86328	196.777	truck	0.153486	1642.7	0.049281	580.565	barge	0.0975349
BLR	CH2	truck	1760	land	2024	base_with_pipeline	0.263158	5.28	0.708	6.25116
BLR	CH2	pipeline	1760	land	2024	base_with_pipeline	0.263158	0.528	0.33	1.12116
BLR	LH2	truck	1760	land	2024	base_with_pipeline	3.268	1.056	0.322533	4.64653
BLR	LH2	rail	1760	land	2024	base_with_pipeline	3.268	0.88	0.282444	4.43044
BLR	NH3	truck	1760	land	2024	base_with_pipeline	2.916	1.76528	0.0116033	4.69288
BLR	NH3	rail	1760	land	2024	base_with_pipeline	2.916	0.218064	0.0101611	3.14423
BLR	MeOH	truck	1760	land	2024	base_with_pipeline	3.46714	1.8304	0.00314667	5.30069
BLR	MeOH	rail	1760	land	2024	base_with_pipeline	3.46714	0.22528	0.00275556	3.69518
BLR	LOHC	truck	1760	land	2024	base_with_pipeline	3.54853	1.3728	0.00708	4.92841
BLR	LOHC	rail	1760	land	2024	base_with_pipeline	3.54853	0.16896	0.0062	3.72369
BLR	LH2	ship	6266.98	maritime	2024	base_with_pipeline	3.268	1.14402	1.05237	5.46438	529.659	truck	0.317795	5156.76	0.50691	580.565	barge	0.319311
BLR	NH3	ship	6266.98	maritime	2024	base_with_pipeline	2.916	0.837109	0.0378595	3.79097	529.659	truck	0.531248	5156.76	0.182549	580.565	barge	0.123312
BLR	MeOH	ship	6266.98	maritime	2024	base_with_pipeline	3.46714	0.887162	0.010267	4.36457	529.659	truck	0.550845	5156.76	0.20627	580.565	barge	0.130047
BLR	LOHC	ship	6266.98	maritime	2024	base_with_pipeline	3.54853	0.665372	0.0231007	4.237	529.659	truck	0.413134	5156.76	0.154703	580.565	barge	0.0975349
BLZ	LH2	ship	9896.83	maritime	2024	base_with_pipeline	3.268	1.27415	1.42442	5.96658	77.8406	truck	0.0467044	9238.42	0.908137	580.565	barge	0.319311
BLZ	NH3	ship	9896.83	maritime	2024	base_with_pipeline	2.916	0.528426	0.0512445	3.49567	77.8406	truck	0.0780741	9238.42	0.32704	580.565	barge	0.123312
BLZ	MeOH	ship	9896.83	maritime	2024	base_with_pipeline	3.46714	0.580538	0.0138968	4.06158	77.8406	truck	0.0809542	9238.42	0.369537	580.565	barge	0.130047
BLZ	LOHC	ship	9896.83	maritime	2024	base_with_pipeline	3.54853	0.435403	0.0312679	4.0152	77.8406	truck	0.0607157	9238.42	0.277153	580.565	barge	0.0975349
BMU	LH2	ship	6979.92	maritime	2024	base_with_pipeline	3.268	0.948367	1.12544	5.34181	0	none	0	6399.35	0.629056	580.565	barge	0.319311
BMU	NH3	ship	6979.92	maritime	2024	base_with_pipeline	2.916	0.349849	0.0404884	3.30634	0	none	0	6399.35	0.226537	580.565	barge	0.123312
BMU	MeOH	ship	6979.92	maritime	2024	base_with_pipeline	3.46714	0.386021	0.0109799	3.86414	0	none	0	6399.35	0.255974	580.565	barge	0.130047
BMU	LOHC	ship	6979.92	maritime	2024	base_with_pipeline	3.54853	0.289515	0.0247048	3.86275	0	none	0	6399.35	0.19198	580.565	barge	0.0975349
BOL	LH2	ship	17429.4	maritime	2024	base_with_pipeline	3.268	2.98781	2.19651	8.45233	2519.94	rail	1.25997	14328.9	1.40853	580.565	barge	0.319311
BOL	NH3	ship	17429.4	maritime	2024	base_with_pipeline	2.916	0.942776	0.0790209	3.9378	2519.94	rail	0.312221	14328.9	0.507243	580.565	barge	0.123312
BOL	MeOH	ship	17429.4	maritime	2024	base_with_pipeline	3.46714	1.02575	0.0214294	4.51433	2519.94	rail	0.322552	14328.9	0.573156	580.565	barge	0.130047
BOL	LOHC	ship	17429.4	maritime	2024	base_with_pipeline	3.54853	0.769316	0.0482162	4.36606	2519.94	rail	0.241914	14328.9	0.429867	580.565	barge	0.0975349
BRA	LH2	ship	11597.5	maritime	2024	base_with_pipeline	3.268	1.85261	1.59875	6.71936	1121.07	rail	0.560535	9895.89	0.972766	580.565	barge	0.319311
BRA	NH3	ship	11597.5	maritime	2024	base_with_pipeline	2.916	0.612527	0.0575159	3.58604	1121.07	rail	0.138901	9895.89	0.350315	580.565	barge	0.123312
BRA	MeOH	ship	11597.5	maritime	2024	base_with_pipeline	3.46714	0.669379	0.0155975	4.15212	1121.07	rail	0.143497	9895.89	0.395836	580.565	barge	0.130047
BRA	LOHC	ship	11597.5	maritime	2024	base_with_pipeline	3.54853	0.502034	0.0350944	4.08566	1121.07	rail	0.107623	9895.89	0.296877	580.565	barge	0.0975349
BRB	LH2	ship	7232.49	maritime	2024	base_with_pipeline	3.268	0.973194	1.15133	5.39252	0	none	0	6651.92	0.653884	580.565	barge	0.319311
BRB	NH3	ship	7232.49	maritime	2024	base_with_pipeline	2.916	0.35879	0.0414198	3.31621	0	none	0	6651.92	0.235478	580.565	barge	0.123312
BRB	MeOH	ship	7232.49	maritime	2024	base_with_pipeline	3.46714	0.396123	0.0112325	3.8745	0	none	0	6651.92	0.266077	580.565	barge	0.130047
BRB	LOHC	ship	7232.49	maritime	2024	base_with_pipeline	3.54853	0.297093	0.0252731	3.8709	0	none	0	6651.92	0.199558	580.565	barge	0.0975349
BRN	LH2	ship	12879.4	maritime	2024	base_with_pipeline	3.268	1.54917	1.73014	6.54731	41.6274	truck	0.0249764	12257.2	1.20488	580.565	barge	0.319311
BRN	NH3	ship	12879.4	maritime	2024	base_with_pipeline	2.916	0.598969	0.0622428	3.57721	41.6274	truck	0.0417523	12257.2	0.433905	580.565	barge	0.123312
BRN	MeOH	ship	12879.4	maritime	2024	base_with_pipeline	3.46714	0.663627	0.0168794	4.14765	41.6274	truck	0.0432925	12257.2	0.490288	580.565	barge	0.130047
BRN	LOHC	ship	12879.4	maritime	2024	base_with_pipeline	3.54853	0.49772	0.0379786	4.08423	41.6274	truck	0.0324694	12257.2	0.367716	580.565	barge	0.0975349
BTN	CH2	truck	12033	land	2024	base_with_pipeline	0.263158	36.099	3.7899	40.1521
BTN	CH2	pipeline	12033	land	2024	base_with_pipeline	0.263158	3.6099	2.25619	6.12925
BTN	LH2	truck	12033	land	2024	base_with_pipeline	3.268	7.2198	1.72651	12.2143
BTN	LH2	rail	12033	land	2024	base_with_pipeline	3.268	6.0165	1.45243	10.7369
BTN	NH3	truck	12033	land	2024	base_with_pipeline	2.916	12.0691	0.0621123	15.0472
BTN	NH3	rail	12033	land	2024	base_with_pipeline	2.916	1.49089	0.0522519	4.45914
BTN	MeOH	truck	12033	land	2024	base_with_pipeline	3.46714	12.5143	0.016844	15.9983
BTN	MeOH	rail	12033	land	2024	base_with_pipeline	3.46714	1.54022	0.01417	5.02154
BTN	LOHC	truck	12033	land	2024	base_with_pipeline	3.54853	9.38574	0.037899	12.9722
BTN	LOHC	rail	12033	land	2024	base_with_pipeline	3.54853	1.15517	0.0318825	4.73558
BTN	LH2	ship	12263	maritime	2024	base_with_pipeline	3.268	1.89816	1.66696	6.83312	1071.62	rail	0.53581	10610.8	1.04304	580.565	barge	0.319311
BTN	NH3	ship	12263	maritime	2024	base_with_pipeline	2.916	0.631708	0.0599698	3.60768	1071.62	rail	0.132774	10610.8	0.375622	580.565	barge	0.123312
BTN	MeOH	ship	12263	maritime	2024	base_with_pipeline	3.46714	0.691646	0.016263	4.17505	1071.62	rail	0.137167	10610.8	0.424432	580.565	barge	0.130047
BTN	LOHC	ship	12263	maritime	2024	base_with_pipeline	3.54853	0.518734	0.0365917	4.10386	1071.62	rail	0.102876	10610.8	0.318324	580.565	barge	0.0975349
BWA	CH2	truck	13018.2	land	2024	base_with_pipeline	0.263158	39.0546	4.08546	43.4032
BWA	CH2	pipeline	13018.2	land	2024	base_with_pipeline	0.263158	3.90546	2.44091	6.60953
BWA	LH2	truck	13018.2	land	2024	base_with_pipeline	3.268	7.81092	1.86115	12.9401
BWA	LH2	rail	13018.2	land	2024	base_with_pipeline	3.268	6.5091	1.56463	11.3417
BWA	NH3	truck	13018.2	land	2024	base_with_pipeline	2.916	13.0573	0.0669562	16.0402
BWA	NH3	rail	13018.2	land	2024	base_with_pipeline	2.916	1.61295	0.0562885	4.58524
BWA	MeOH	truck	13018.2	land	2024	base_with_pipeline	3.46714	13.5389	0.0181576	17.0242
BWA	MeOH	rail	13018.2	land	2024	base_with_pipeline	3.46714	1.66633	0.0152647	5.14874
BWA	LOHC	truck	13018.2	land	2024	base_with_pipeline	3.54853	10.1542	0.0408546	13.7436
BWA	LOHC	rail	13018.2	land	2024	base_with_pipeline	3.54853	1.24975	0.0343455	4.83262
BWA	LH2	ship	12440	maritime	2024	base_with_pipeline	3.268	1.96022	1.6851	6.91332	947.029	truck	0.568217	10912.4	1.07269	580.565	barge	0.319311
BWA	NH3	ship	12440	maritime	2024	base_with_pipeline	2.916	1.45948	0.0606225	4.4361	947.029	truck	0.94987	10912.4	0.386299	580.565	barge	0.123312
BWA	MeOH	ship	12440	maritime	2024	base_with_pipeline	3.46714	1.55145	0.01644	5.03504	947.029	truck	0.98491	10912.4	0.436496	580.565	barge	0.130047
BWA	LOHC	ship	12440	maritime	2024	base_with_pipeline	3.54853	1.16359	0.03699	4.74911	947.029	truck	0.738683	10912.4	0.327372	580.565	barge	0.0975349
CAF	CH2	truck	9288.42	land	2024	base_with_pipeline	0.263158	27.8653	2.96653	31.0949
CAF	CH2	pipeline	9288.42	land	2024	base_with_pipeline	0.263158	2.78653	1.74158	4.79126
CAF	LH2	truck	9288.42	land	2024	base_with_pipeline	3.268	5.57305	1.35142	10.1925
CAF	LH2	rail	9288.42	land	2024	base_with_pipeline	3.268	4.64421	1.13985	9.05206
CAF	NH3	truck	9288.42	land	2024	base_with_pipeline	2.916	9.31629	0.0486181	12.2809
CAF	NH3	rail	9288.42	land	2024	base_with_pipeline	2.916	1.15084	0.0410067	4.10784
CAF	MeOH	truck	9288.42	land	2024	base_with_pipeline	3.46714	9.65996	0.0131846	13.1403
CAF	MeOH	rail	9288.42	land	2024	base_with_pipeline	3.46714	1.18892	0.0111205	4.66718
CAF	LOHC	truck	9288.42	land	2024	base_with_pipeline	3.54853	7.24497	0.0296653	10.8232
CAF	LOHC	rail	9288.42	land	2024	base_with_pipeline	3.54853	0.891688	0.025021	4.46524
CAF	LH2	ship	9235.3	maritime	2024	base_with_pipeline	3.268	1.68148	1.35662	6.3061	1273.12	rail	0.63656	7381.61	0.725612	580.565	barge	0.319311
CAF	NH3	ship	9235.3	maritime	2024	base_with_pipeline	2.916	0.542361	0.0488052	3.50717	1273.12	rail	0.15774	7381.61	0.261309	580.565	barge	0.123312
CAF	MeOH	ship	9235.3	maritime	2024	base_with_pipeline	3.46714	0.58827	0.0132353	4.06865	1273.12	rail	0.162959	7381.61	0.295264	580.565	barge	0.130047
CAF	LOHC	ship	9235.3	maritime	2024	base_with_pipeline	3.54853	0.441203	0.0297794	4.01951	1273.12	rail	0.12222	7381.61	0.221448	580.565	barge	0.0975349
CAN	LH2	ship	7841.81	maritime	2024	base_with_pipeline	3.268	1.47589	1.21379	5.95768	1102.32	rail	0.55116	6158.92	0.605422	580.565	barge	0.319311
CAN	NH3	ship	7841.81	maritime	2024	base_with_pipeline	2.916	0.477915	0.0436667	3.43758	1102.32	rail	0.136577	6158.92	0.218026	580.565	barge	0.123312
CAN	MeOH	ship	7841.81	maritime	2024	base_with_pipeline	3.46714	0.5175	0.0118418	3.99648	1102.32	rail	0.141097	6158.92	0.246357	580.565	barge	0.130047
CAN	LOHC	ship	7841.81	maritime	2024	base_with_pipeline	3.54853	0.388125	0.0266441	3.9633	1102.32	rail	0.105823	6158.92	0.184768	580.565	barge	0.0975349
CHL	LH2	ship	15025	maritime	2024	base_with_pipeline	3.268	1.79715	1.95006	7.01522	115.521	truck	0.0693126	14328.9	1.40853	580.565	barge	0.319311
CHL	NH3	ship	15025	maritime	2024	base_with_pipeline	2.916	0.746423	0.0701546	3.73258	115.521	truck	0.115868	14328.9	0.507243	580.565	barge	0.123312
CHL	MeOH	ship	15025	maritime	2024	base_with_pipeline	3.46714	0.823344	0.019025	4.30951	115.521	truck	0.120142	14328.9	0.573156	580.565	barge	0.130047
CHL	LOHC	ship	15025	maritime	2024	base_with_pipeline	3.54853	0.617508	0.0428062	4.20884	115.521	truck	0.0901064	14328.9	0.429867	580.565	barge	0.0975349
CHN	LH2	ship	17455	maritime	2024	base_with_pipeline	3.268	2.56007	2.19914	8.02721	1448.85	rail	0.724425	15425.6	1.51634	580.565	barge	0.319311
CHN	NH3	ship	17455	maritime	2024	base_with_pipeline	2.916	0.848891	0.0791154	3.84401	1448.85	rail	0.179513	15425.6	0.546066	580.565	barge	0.123312
CHN	MeOH	ship	17455	maritime	2024	base_with_pipeline	3.46714	0.932523	0.021455	4.42112	1448.85	rail	0.185453	15425.6	0.617024	580.565	barge	0.130047
CHN	LOHC	ship	17455	maritime	2024	base_with_pipeline	3.54853	0.699393	0.0482738	4.2962	1448.85	rail	0.13909	15425.6	0.462768	580.565	barge	0.0975349
CIV	LH2	ship	6915.64	maritime	2024	base_with_pipeline	3.268	1.06776	1.11885	5.45461	250.564	truck	0.150338	6084.51	0.598107	580.565	barge	0.319311
CIV	NH3	ship	6915.64	maritime	2024	base_with_pipeline	2.916	0.590019	0.0402514	3.54627	250.564	truck	0.251316	6084.51	0.215392	580.565	barge	0.123312
CIV	MeOH	ship	6915.64	maritime	2024	base_with_pipeline	3.46714	0.634014	0.0109156	4.11207	250.564	truck	0.260587	6084.51	0.24338	580.565	barge	0.130047
CIV	LOHC	ship	6915.64	maritime	2024	base_with_pipeline	3.54853	0.47551	0.0245602	4.0486	250.564	truck	0.19544	6084.51	0.182535	580.565	barge	0.0975349
CMR	LH2	ship	8245.79	maritime	2024	base_with_pipeline	3.268	1.21486	1.25519	5.73806	283.162	truck	0.169897	7382.06	0.725656	580.565	barge	0.319311
CMR	NH3	ship	8245.79	maritime	2024	base_with_pipeline	2.916	0.668648	0.0451563	3.6298	283.162	truck	0.284011	7382.06	0.261325	580.565	barge	0.123312
CMR	MeOH	ship	8245.79	maritime	2024	base_with_pipeline	3.46714	0.719817	0.0122458	4.19921	283.162	truck	0.294488	7382.06	0.295282	580.565	barge	0.130047
CMR	LOHC	ship	8245.79	maritime	2024	base_with_pipeline	3.54853	0.539863	0.027553	4.11595	283.162	truck	0.220866	7382.06	0.221462	580.565	barge	0.0975349
COD	LH2	ship	8785.69	maritime	2024	base_with_pipeline	3.268	1.12587	1.31053	5.70441	0	none	0	8205.12	0.806563	580.565	barge	0.319311
COD	NH3	ship	8785.69	maritime	2024	base_with_pipeline	2.916	0.413773	0.0471472	3.37692	0	none	0	8205.12	0.290461	580.565	barge	0.123312
COD	MeOH	ship	8785.69	maritime	2024	base_with_pipeline	3.46714	0.458251	0.0127857	3.93818	0	none	0	8205.12	0.328205	580.565	barge	0.130047
COD	LOHC	ship	8785.69	maritime	2024	base_with_pipeline	3.54853	0.343689	0.0287678	3.92099	0	none	0	8205.12	0.246154	580.565	barge	0.0975349
COG	LH2	ship	9120.69	maritime	2024	base_with_pipeline	3.268	1.37847	1.34487	5.99134	437.85	truck	0.26271	8102.27	0.796453	580.565	barge	0.319311
COG	NH3	ship	9120.69	maritime	2024	base_with_pipeline	2.916	0.849296	0.0483825	3.81368	437.85	truck	0.439164	8102.27	0.28682	580.565	barge	0.123312
COG	MeOH	ship	9120.69	maritime	2024	base_with_pipeline	3.46714	0.909501	0.0131207	4.38976	437.85	truck	0.455364	8102.27	0.324091	580.565	barge	0.130047
COG	LOHC	ship	9120.69	maritime	2024	base_with_pipeline	3.54853	0.682126	0.0295215	4.26018	437.85	truck	0.341523	8102.27	0.243068	580.565	barge	0.0975349
COK	LH2	ship	18573.8	maritime	2024	base_with_pipeline	3.268	2.08804	2.31381	7.66985	0	none	0	17993.2	1.76873	580.565	barge	0.319311
COK	NH3	ship	18573.8	maritime	2024	base_with_pipeline	2.916	0.760271	0.0832408	3.75951	0	none	0	17993.2	0.636959	580.565	barge	0.123312
COK	MeOH	ship	18573.8	maritime	2024	base_with_pipeline	3.46714	0.849775	0.0225738	4.33949	0	none	0	17993.2	0.719728	580.565	barge	0.130047
COK	LOHC	ship	18573.8	maritime	2024	base_with_pipeline	3.54853	0.637331	0.050791	4.23665	0	none	0	17993.2	0.539796	580.565	barge	0.0975349
COL	LH2	ship	9869.2	maritime	2024	base_with_pipeline	3.268	1.70101	1.42159	6.3906	934.081	truck	0.560449	8354.55	0.821252	580.565	barge	0.319311
COL	NH3	ship	9869.2	maritime	2024	base_with_pipeline	2.916	1.35595	0.0511427	4.32309	934.081	truck	0.936883	8354.55	0.295751	580.565	barge	0.123312
COL	MeOH	ship	9869.2	maritime	2024	base_with_pipeline	3.46714	1.43567	0.0138692	4.91668	934.081	truck	0.971444	8354.55	0.334182	580.565	barge	0.130047
COL	LOHC	ship	9869.2	maritime	2024	base_with_pipeline	3.54853	1.07675	0.0312057	4.65649	934.081	truck	0.728583	8354.55	0.250636	580.565	barge	0.0975349
COM	LH2	ship	9141.5	maritime	2024	base_with_pipeline	3.268	1.16085	1.347	5.77585	0	none	0	8560.93	0.841539	580.565	barge	0.319311
COM	NH3	ship	9141.5	maritime	2024	base_with_pipeline	2.916	0.426369	0.0484593	3.39083	0	none	0	8560.93	0.303057	580.565	barge	0.123312
COM	MeOH	ship	9141.5	maritime	2024	base_with_pipeline	3.46714	0.472484	0.0131415	3.95277	0	none	0	8560.93	0.342437	580.565	barge	0.130047
COM	LOHC	ship	9141.5	maritime	2024	base_with_pipeline	3.54853	0.354363	0.0295684	3.93246	0	none	0	8560.93	0.256828	580.565	barge	0.0975349
CPV	LH2	ship	4363.76	maritime	2024	base_with_pipeline	3.268	0.691199	0.857286	4.81649	0	none	0	3783.2	0.371889	580.565	barge	0.319311
CPV	NH3	ship	4363.76	maritime	2024	base_with_pipeline	2.916	0.257237	0.0308414	3.20408	0	none	0	3783.2	0.133925	580.565	barge	0.123312
CPV	MeOH	ship	4363.76	maritime	2024	base_with_pipeline	3.46714	0.281375	0.00836377	3.75688	0	none	0	3783.2	0.151328	580.565	barge	0.130047
CPV	LOHC	ship	4363.76	maritime	2024	base_with_pipeline	3.54853	0.211031	0.0188185	3.77838	0	none	0	3783.2	0.113496	580.565	barge	0.0975349
CRI	LH2	ship	9822.7	maritime	2024	base_with_pipeline	3.268	1.29888	1.41683	5.9837	141.645	truck	0.084987	9100.49	0.894578	580.565	barge	0.319311
CRI	NH3	ship	9822.7	maritime	2024	base_with_pipeline	2.916	0.587539	0.0509712	3.55451	141.645	truck	0.14207	9100.49	0.322157	580.565	barge	0.123312
CRI	MeOH	ship	9822.7	maritime	2024	base_with_pipeline	3.46714	0.641377	0.0138227	4.12234	141.645	truck	0.147311	9100.49	0.36402	580.565	barge	0.130047
CRI	LOHC	ship	9822.7	maritime	2024	base_with_pipeline	3.54853	0.481033	0.0311011	4.06066	141.645	truck	0.110483	9100.49	0.273015	580.565	barge	0.0975349
CUB	LH2	ship	9297.24	maritime	2024	base_with_pipeline	3.268	1.17616	1.36297	5.80713	0	none	0	8716.67	0.856849	580.565	barge	0.319311
CUB	NH3	ship	9297.24	maritime	2024	base_with_pipeline	2.916	0.431882	0.0490336	3.39692	0	none	0	8716.67	0.30857	580.565	barge	0.123312
CUB	MeOH	ship	9297.24	maritime	2024	base_with_pipeline	3.46714	0.478713	0.0132972	3.95915	0	none	0	8716.67	0.348667	580.565	barge	0.130047
CUB	LOHC	ship	9297.24	maritime	2024	base_with_pipeline	3.54853	0.359035	0.0299188	3.93748	0	none	0	8716.67	0.2615	580.565	barge	0.0975349
CYM	LH2	ship	9074.82	maritime	2024	base_with_pipeline	3.268	1.1543	1.34017	5.76246	0	none	0	8494.25	0.834985	580.565	barge	0.319311
CYM	NH3	ship	9074.82	maritime	2024	base_with_pipeline	2.916	0.424008	0.0482134	3.38822	0	none	0	8494.25	0.300696	580.565	barge	0.123312
CYM	MeOH	ship	9074.82	maritime	2024	base_with_pipeline	3.46714	0.469817	0.0130748	3.95003	0	none	0	8494.25	0.33977	580.565	barge	0.130047
CYM	LOHC	ship	9074.82	maritime	2024	base_with_pipeline	3.54853	0.352362	0.0294183	3.93031	0	none	0	8494.25	0.254827	580.565	barge	0.0975349
CYP	LH2	ship	3027.38	maritime	2024	base_with_pipeline	3.268	0.581356	0.720307	4.56966	42.8995	truck	0.0257397	2403.92	0.236305	580.565	barge	0.319311
CYP	NH3	ship	3027.38	maritime	2024	base_with_pipeline	2.916	0.251439	0.0259135	3.19335	42.8995	truck	0.0430282	2403.92	0.0850988	580.565	barge	0.123312
CYP	MeOH	ship	3027.38	maritime	2024	base_with_pipeline	3.46714	0.270819	0.00702738	3.74499	42.8995	truck	0.0446155	2403.92	0.0961568	580.565	barge	0.130047
CYP	LOHC	ship	3027.38	maritime	2024	base_with_pipeline	3.54853	0.203114	0.0158116	3.76746	42.8995	truck	0.0334616	2403.92	0.0721176	580.565	barge	0.0975349
CZE	CH2	truck	720	land	2024	base_with_pipeline	0.263158	2.16	0.396	2.81916
CZE	CH2	pipeline	720	land	2024	base_with_pipeline	0.263158	0.216	0.135	0.614158
CZE	LH2	truck	720	land	2024	base_with_pipeline	3.268	0.432	0.1804	3.8804
CZE	LH2	rail	720	land	2024	base_with_pipeline	3.268	0.36	0.164	3.792
CZE	LH2	barge	720	land	2024	base_with_pipeline	3.268	0.396	0.369	4.033
CZE	NH3	truck	720	land	2024	base_with_pipeline	2.916	0.72216	0.00649	3.64465
CZE	NH3	rail	720	land	2024	base_with_pipeline	2.916	0.089208	0.0059	3.01111
CZE	NH3	barge	720	land	2024	base_with_pipeline	2.916	0.152928	0.013275	3.0822
CZE	MeOH	truck	720	land	2024	base_with_pipeline	3.46714	0.7488	0.00176	4.2177
CZE	MeOH	rail	720	land	2024	base_with_pipeline	3.46714	0.09216	0.0016	3.5609
CZE	MeOH	barge	720	land	2024	base_with_pipeline	3.46714	0.16128	0.0036	3.63202
CZE	LOHC	truck	720	land	2024	base_with_pipeline	3.54853	0.5616	0.00396	4.11409
CZE	LOHC	rail	720	land	2024	base_with_pipeline	3.54853	0.06912	0.0036	3.62125
CZE	LOHC	barge	720	land	2024	base_with_pipeline	3.54853	0.12096	0.0081	3.67759
DEU	CH2	truck	870	land	2024	base_with_pipeline	0.263158	2.61	0.441	3.31416
DEU	CH2	pipeline	870	land	2024	base_with_pipeline	0.263158	0.261	0.163125	0.687283
DEU	LH2	truck	870	land	2024	base_with_pipeline	3.268	0.522	0.2009	3.9909
DEU	LH2	rail	870	land	2024	base_with_pipeline	3.268	0.435	0.181083	3.88408
DEU	LH2	barge	870	land	2024	base_with_pipeline	3.268	0.4785	0.394625	4.14113
DEU	NH3	truck	870	land	2024	base_with_pipeline	2.916	0.87261	0.0072275	3.79584
DEU	NH3	rail	870	land	2024	base_with_pipeline	2.916	0.107793	0.00651458	3.03031
DEU	NH3	barge	870	land	2024	base_with_pipeline	2.916	0.184788	0.0141969	3.11498
DEU	MeOH	truck	870	land	2024	base_with_pipeline	3.46714	0.9048	0.00196	4.3739
DEU	MeOH	rail	870	land	2024	base_with_pipeline	3.46714	0.11136	0.00176667	3.58027
DEU	MeOH	barge	870	land	2024	base_with_pipeline	3.46714	0.19488	0.00385	3.66587
DEU	LOHC	truck	870	land	2024	base_with_pipeline	3.54853	0.6786	0.00441	4.23154
DEU	LOHC	rail	870	land	2024	base_with_pipeline	3.54853	0.08352	0.003975	3.63602
DEU	LOHC	barge	870	land	2024	base_with_pipeline	3.54853	0.14616	0.0086625	3.70335
DEU	LH2	ship	4740.86	maritime	2024	base_with_pipeline	3.268	0.924292	0.895939	5.08823	390.719	truck	0.234431	3769.58	0.37055	580.565	barge	0.319311
DEU	NH3	ship	4740.86	maritime	2024	base_with_pipeline	2.916	0.648646	0.0322319	3.59688	390.719	truck	0.391891	3769.58	0.133443	580.565	barge	0.123312
DEU	MeOH	ship	4740.86	maritime	2024	base_with_pipeline	3.46714	0.687178	0.00874086	4.16306	390.719	truck	0.406348	3769.58	0.150783	580.565	barge	0.130047
DEU	LOHC	ship	4740.86	maritime	2024	base_with_pipeline	3.54853	0.515383	0.0196669	4.08358	390.719	truck	0.304761	3769.58	0.113087	580.565	barge	0.0975349
DJI	LH2	ship	5379.57	maritime	2024	base_with_pipeline	3.268	0.940296	0.961406	5.1697	297.475	truck	0.178485	4501.53	0.4425	580.565	barge	0.319311
DJI	NH3	ship	5379.57	maritime	2024	base_with_pipeline	2.916	0.581034	0.0345872	3.53162	297.475	truck	0.298367	4501.53	0.159354	580.565	barge	0.123312
DJI	MeOH	ship	5379.57	maritime	2024	base_with_pipeline	3.46714	0.619482	0.00937957	4.096	297.475	truck	0.309374	4501.53	0.180061	580.565	barge	0.130047
DJI	LOHC	ship	5379.57	maritime	2024	base_with_pipeline	3.54853	0.464611	0.021104	4.03424	297.475	truck	0.232031	4501.53	0.135046	580.565	barge	0.0975349
DMA	LH2	ship	7298.84	maritime	2024	base_with_pipeline	3.268	0.979717	1.15813	5.40585	0	none	0	6718.27	0.660406	580.565	barge	0.319311
DMA	NH3	ship	7298.84	maritime	2024	base_with_pipeline	2.916	0.361139	0.0416645	3.3188	0	none	0	6718.27	0.237827	580.565	barge	0.123312
DMA	MeOH	ship	7298.84	maritime	2024	base_with_pipeline	3.46714	0.398777	0.0112988	3.87722	0	none	0	6718.27	0.268731	580.565	barge	0.130047
DMA	LOHC	ship	7298.84	maritime	2024	base_with_pipeline	3.54853	0.299083	0.0254224	3.87303	0	none	0	6718.27	0.201548	580.565	barge	0.0975349
DNK	CH2	truck	1170	land	2024	base_with_pipeline	0.263158	3.51	0.531	4.30416
DNK	CH2	pipeline	1170	land	2024	base_with_pipeline	0.263158	0.351	0.219375	0.833533
DNK	LH2	truck	1170	land	2024	base_with_pipeline	3.268	0.702	0.2419	4.2119
DNK	LH2	rail	1170	land	2024	base_with_pipeline	3.268	0.585	0.21525	4.06825
DNK	NH3	truck	1170	land	2024	base_with_pipeline	2.916	1.17351	0.0087025	4.09821
DNK	NH3	rail	1170	land	2024	base_with_pipeline	2.916	0.144963	0.00774375	3.06871
DNK	MeOH	truck	1170	land	2024	base_with_pipeline	3.46714	1.2168	0.00236	4.6863
DNK	MeOH	rail	1170	land	2024	base_with_pipeline	3.46714	0.14976	0.0021	3.619
DNK	LOHC	truck	1170	land	2024	base_with_pipeline	3.54853	0.9126	0.00531	4.46644
DNK	LOHC	rail	1170	land	2024	base_with_pipeline	3.54853	0.11232	0.004725	3.66557
DNK	LH2	ship	5151.67	maritime	2024	base_with_pipeline	3.268	0.768651	0.938047	4.9747	0	none	0	4571.11	0.44934	580.565	barge	0.319311
DNK	NH3	ship	5151.67	maritime	2024	base_with_pipeline	2.916	0.285129	0.0337468	3.23488	0	none	0	4571.11	0.161817	580.565	barge	0.123312
DNK	MeOH	ship	5151.67	maritime	2024	base_with_pipeline	3.46714	0.312891	0.00915168	3.78919	0	none	0	4571.11	0.182844	580.565	barge	0.130047
DNK	LOHC	ship	5151.67	maritime	2024	base_with_pipeline	3.54853	0.234668	0.0205913	3.80379	0	none	0	4571.11	0.137133	580.565	barge	0.0975349
DOM	LH2	ship	7937.07	maritime	2024	base_with_pipeline	3.268	1.04245	1.22355	5.534	0	none	0	7356.5	0.723144	580.565	barge	0.319311
DOM	NH3	ship	7937.07	maritime	2024	base_with_pipeline	2.916	0.383732	0.0440179	3.34375	0	none	0	7356.5	0.26042	580.565	barge	0.123312
DOM	MeOH	ship	7937.07	maritime	2024	base_with_pipeline	3.46714	0.424307	0.0119371	3.90339	0	none	0	7356.5	0.29426	580.565	barge	0.130047
DOM	LOHC	ship	7937.07	maritime	2024	base_with_pipeline	3.54853	0.31823	0.0268584	3.89362	0	none	0	7356.5	0.220695	580.565	barge	0.0975349
DZA	LH2	ship	1831.15	maritime	2024	base_with_pipeline	3.268	0.635877	0.597692	4.50157	385.957	truck	0.231574	864.624	0.0849925	580.565	barge	0.319311
DZA	NH3	ship	1831.15	maritime	2024	base_with_pipeline	2.916	0.541035	0.0215024	3.47854	385.957	truck	0.387115	864.624	0.0306077	580.565	barge	0.123312
DZA	MeOH	ship	1831.15	maritime	2024	base_with_pipeline	3.46714	0.566027	0.00583115	4.039	385.957	truck	0.401395	864.624	0.034585	580.565	barge	0.130047
DZA	LOHC	ship	1831.15	maritime	2024	base_with_pipeline	3.54853	0.42452	0.0131201	3.98617	385.957	truck	0.301046	864.624	0.0259387	580.565	barge	0.0975349
ECU	LH2	ship	11028.2	maritime	2024	base_with_pipeline	3.268	1.52029	1.54039	6.32868	346.764	truck	0.208058	10100.9	0.992918	580.565	barge	0.319311
ECU	NH3	ship	11028.2	maritime	2024	base_with_pipeline	2.916	0.828688	0.0554166	3.8001	346.764	truck	0.347804	10100.9	0.357572	580.565	barge	0.123312
ECU	MeOH	ship	11028.2	maritime	2024	base_with_pipeline	3.46714	0.894717	0.0150282	4.37689	346.764	truck	0.360635	10100.9	0.404036	580.565	barge	0.130047
ECU	LOHC	ship	11028.2	maritime	2024	base_with_pipeline	3.54853	0.671038	0.0338135	4.25338	346.764	truck	0.270476	10100.9	0.303027	580.565	barge	0.0975349
EGY	LH2	ship	2781.48	maritime	2024	base_with_pipeline	3.268	0.623456	0.695102	4.58656	174.995	truck	0.104997	2025.92	0.199148	580.565	barge	0.319311
EGY	NH3	ship	2781.48	maritime	2024	base_with_pipeline	2.916	0.37055	0.0250067	3.31156	174.995	truck	0.17552	2025.92	0.0717176	580.565	barge	0.123312
EGY	MeOH	ship	2781.48	maritime	2024	base_with_pipeline	3.46714	0.393078	0.00678148	3.867	174.995	truck	0.181995	2025.92	0.0810368	580.565	barge	0.130047
EGY	LOHC	ship	2781.48	maritime	2024	base_with_pipeline	3.54853	0.294809	0.0152583	3.8586	174.995	truck	0.136496	2025.92	0.0607776	580.565	barge	0.0975349
ERI	LH2	ship	5563.33	maritime	2024	base_with_pipeline	3.268	1.10632	0.980242	5.35456	592.388	truck	0.355433	4390.38	0.431574	580.565	barge	0.319311
ERI	NH3	ship	5563.33	maritime	2024	base_with_pipeline	2.916	0.872897	0.0352648	3.82416	592.388	truck	0.594165	4390.38	0.155419	580.565	barge	0.123312
ERI	MeOH	ship	5563.33	maritime	2024	base_with_pipeline	3.46714	0.921745	0.00956333	4.39845	592.388	truck	0.616084	4390.38	0.175615	580.565	barge	0.130047
ERI	LOHC	ship	5563.33	maritime	2024	base_with_pipeline	3.54853	0.691309	0.0215175	4.26136	592.388	truck	0.462063	4390.38	0.131711	580.565	barge	0.0975349
ESP	CH2	truck	1600	land	2024	base_with_pipeline	0.263158	4.8	0.66	5.72316
ESP	CH2	pipeline	1600	land	2024	base_with_pipeline	0.263158	0.48	0.3	1.04316
ESP	LH2	truck	1600	land	2024	base_with_pipeline	3.268	0.96	0.300667	4.52867
ESP	LH2	rail	1600	land	2024	base_with_pipeline	3.268	0.8	0.264222	4.33222
ESP	NH3	truck	1600	land	2024	base_with_pipeline	2.916	1.6048	0.0108167	4.53162
ESP	NH3	rail	1600	land	2024	base_with_pipeline	2.916	0.19824	0.00950556	3.12375
ESP	MeOH	truck	1600	land	2024	base_with_pipeline	3.46714	1.664	0.00293333	5.13408
ESP	MeOH	rail	1600	land	2024	base_with_pipeline	3.46714	0.2048	0.00257778	3.67452
ESP	LOHC	truck	1600	land	2024	base_with_pipeline	3.54853	1.248	0.0066	4.80313
ESP	LOHC	rail	1600	land	2024	base_with_pipeline	3.54853	0.1536	0.0058	3.70793
ESP	LH2	ship	2305.48	maritime	2024	base_with_pipeline	3.268	0.817639	0.646311	4.73195	655.311	truck	0.393187	1069.6	0.105142	580.565	barge	0.319311
ESP	NH3	ship	2305.48	maritime	2024	base_with_pipeline	2.916	0.818453	0.0232514	3.7577	655.311	truck	0.657277	1069.6	0.0378638	580.565	barge	0.123312
ESP	MeOH	ship	2305.48	maritime	2024	base_with_pipeline	3.46714	0.854354	0.00630548	4.3278	655.311	truck	0.681523	1069.6	0.042784	580.565	barge	0.130047
ESP	LOHC	ship	2305.48	maritime	2024	base_with_pipeline	3.54853	0.640765	0.0141873	4.20348	655.311	truck	0.511143	1069.6	0.032088	580.565	barge	0.0975349
EST	CH2	truck	2080	land	2024	base_with_pipeline	0.263158	6.24	0.804	7.30716
EST	CH2	pipeline	2080	land	2024	base_with_pipeline	0.263158	0.624	0.39	1.27716
EST	LH2	truck	2080	land	2024	base_with_pipeline	3.268	1.248	0.366267	4.88227
EST	LH2	rail	2080	land	2024	base_with_pipeline	3.268	1.04	0.318889	4.62689
EST	NH3	truck	2080	land	2024	base_with_pipeline	2.916	2.08624	0.0131767	5.01542
EST	NH3	rail	2080	land	2024	base_with_pipeline	2.916	0.257712	0.0114722	3.18518
EST	MeOH	truck	2080	land	2024	base_with_pipeline	3.46714	2.1632	0.00357333	5.63392
EST	MeOH	rail	2080	land	2024	base_with_pipeline	3.46714	0.26624	0.00311111	3.73649
EST	LOHC	truck	2080	land	2024	base_with_pipeline	3.54853	1.6224	0.00804	5.17897
EST	LOHC	rail	2080	land	2024	base_with_pipeline	3.54853	0.19968	0.007	3.75521
EST	LH2	ship	5790.33	maritime	2024	base_with_pipeline	3.268	0.842834	1.00351	5.11434	22.7279	truck	0.0136367	5187.04	0.509886	580.565	barge	0.319311
EST	NH3	ship	5790.33	maritime	2024	base_with_pipeline	2.916	0.329729	0.0361019	3.28183	22.7279	truck	0.0227961	5187.04	0.183621	580.565	barge	0.123312
EST	MeOH	ship	5790.33	maritime	2024	base_with_pipeline	3.46714	0.361165	0.00979033	3.8381	22.7279	truck	0.023637	5187.04	0.207482	580.565	barge	0.130047
EST	LOHC	ship	5790.33	maritime	2024	base_with_pipeline	3.54853	0.270874	0.0220282	3.84143	22.7279	truck	0.0177278	5187.04	0.155611	580.565	barge	0.0975349
ETH	CH2	truck	7870.61	land	2024	base_with_pipeline	0.263158	23.6118	2.54118	26.4162
ETH	CH2	pipeline	7870.61	land	2024	base_with_pipeline	0.263158	2.36118	1.47574	4.10008
ETH	LH2	truck	7870.61	land	2024	base_with_pipeline	3.268	4.72237	1.15765	9.14802
ETH	LH2	rail	7870.61	land	2024	base_with_pipeline	3.268	3.93531	0.978375	8.18168
ETH	NH3	truck	7870.61	land	2024	base_with_pipeline	2.916	7.89422	0.0416472	10.8519
ETH	NH3	rail	7870.61	land	2024	base_with_pipeline	2.916	0.975169	0.0351976	3.92637
ETH	MeOH	truck	7870.61	land	2024	base_with_pipeline	3.46714	8.18543	0.0112941	11.6639
ETH	MeOH	rail	7870.61	land	2024	base_with_pipeline	3.46714	1.00744	0.00954512	4.48413
ETH	LOHC	truck	7870.61	land	2024	base_with_pipeline	3.54853	6.13908	0.0254118	9.71302
ETH	LOHC	rail	7870.61	land	2024	base_with_pipeline	3.54853	0.755579	0.0214765	4.32558
ETH	LH2	ship	5832.95	maritime	2024	base_with_pipeline	3.268	1.26916	1.00788	5.54504	864.141	truck	0.518485	4388.24	0.431364	580.565	barge	0.319311
ETH	NH3	ship	5832.95	maritime	2024	base_with_pipeline	2.916	1.14539	0.036259	4.09765	864.141	truck	0.866733	4388.24	0.155344	580.565	barge	0.123312
ETH	MeOH	ship	5832.95	maritime	2024	base_with_pipeline	3.46714	1.20428	0.00983295	4.68126	864.141	truck	0.898707	4388.24	0.17553	580.565	barge	0.130047
ETH	LOHC	ship	5832.95	maritime	2024	base_with_pipeline	3.54853	0.903212	0.0221241	4.47387	864.141	truck	0.67403	4388.24	0.131647	580.565	barge	0.0975349
FIN	CH2	truck	2240	land	2024	base_with_pipeline	0.263158	6.72	0.852	7.83516
FIN	CH2	pipeline	2240	land	2024	base_with_pipeline	0.263158	0.672	0.42	1.35516
FIN	LH2	truck	2240	land	2024	base_with_pipeline	3.268	1.344	0.388133	5.00013
FIN	LH2	rail	2240	land	2024	base_with_pipeline	3.268	1.12	0.337111	4.72511
FIN	NH3	truck	2240	land	2024	base_with_pipeline	2.916	2.24672	0.0139633	5.17668
FIN	NH3	rail	2240	land	2024	base_with_pipeline	2.916	0.277536	0.0121278	3.20566
FIN	MeOH	truck	2240	land	2024	base_with_pipeline	3.46714	2.3296	0.00378667	5.80053
FIN	MeOH	rail	2240	land	2024	base_with_pipeline	3.46714	0.28672	0.00328889	3.75715
FIN	LOHC	truck	2240	land	2024	base_with_pipeline	3.54853	1.7472	0.00852	5.30425
FIN	LOHC	rail	2240	land	2024	base_with_pipeline	3.54853	0.21504	0.0074	3.77097
FIN	LH2	ship	5783.88	maritime	2024	base_with_pipeline	3.268	0.830796	1.00285	5.10164	0	none	0	5203.31	0.511485	580.565	barge	0.319311
FIN	NH3	ship	5783.88	maritime	2024	base_with_pipeline	2.916	0.307509	0.036078	3.25959	0	none	0	5203.31	0.184197	580.565	barge	0.123312
FIN	MeOH	ship	5783.88	maritime	2024	base_with_pipeline	3.46714	0.338179	0.00978388	3.81511	0	none	0	5203.31	0.208132	580.565	barge	0.130047
FIN	LOHC	ship	5783.88	maritime	2024	base_with_pipeline	3.54853	0.253634	0.0220137	3.82418	0	none	0	5203.31	0.156099	580.565	barge	0.0975349
FJI	LH2	ship	19915.5	maritime	2024	base_with_pipeline	3.268	2.21993	2.45134	7.93927	0	none	0	19334.9	1.90062	580.565	barge	0.319311
FJI	NH3	ship	19915.5	maritime	2024	base_with_pipeline	2.916	0.807767	0.0881883	3.81196	0	none	0	19334.9	0.684455	580.565	barge	0.123312
FJI	MeOH	ship	19915.5	maritime	2024	base_with_pipeline	3.46714	0.903443	0.0239155	4.3945	0	none	0	19334.9	0.773396	580.565	barge	0.130047
FJI	LOHC	ship	19915.5	maritime	2024	base_with_pipeline	3.54853	0.677582	0.0538098	4.27992	0	none	0	19334.9	0.580047	580.565	barge	0.0975349
FLK	LH2	ship	13844.1	maritime	2024	base_with_pipeline	3.268	1.62311	1.82902	6.72013	0	none	0	13263.5	1.3038	580.565	barge	0.319311
FLK	NH3	ship	13844.1	maritime	2024	base_with_pipeline	2.916	0.59284	0.0658	3.57464	0	none	0	13263.5	0.469528	580.565	barge	0.123312
FLK	MeOH	ship	13844.1	maritime	2024	base_with_pipeline	3.46714	0.660587	0.0178441	4.14557	0	none	0	13263.5	0.53054	580.565	barge	0.130047
FLK	LOHC	ship	13844.1	maritime	2024	base_with_pipeline	3.54853	0.49544	0.0401491	4.08412	0	none	0	13263.5	0.397905	580.565	barge	0.0975349
FRA	CH2	truck	570	land	2024	base_with_pipeline	0.263158	1.71	0.351	2.32416
FRA	CH2	pipeline	570	land	2024	base_with_pipeline	0.263158	0.171	0.106875	0.541033
FRA	LH2	truck	570	land	2024	base_with_pipeline	3.268	0.342	0.1599	3.7699
FRA	LH2	rail	570	land	2024	base_with_pipeline	3.268	0.285	0.146917	3.69992
FRA	LH2	barge	570	land	2024	base_with_pipeline	3.268	0.3135	0.343375	3.92488
FRA	NH3	truck	570	land	2024	base_with_pipeline	2.916	0.57171	0.0057525	3.49346
FRA	NH3	rail	570	land	2024	base_with_pipeline	2.916	0.070623	0.00528542	2.99191
FRA	NH3	barge	570	land	2024	base_with_pipeline	2.916	0.121068	0.0123531	3.04942
FRA	MeOH	truck	570	land	2024	base_with_pipeline	3.46714	0.5928	0.00156	4.0615
FRA	MeOH	rail	570	land	2024	base_with_pipeline	3.46714	0.07296	0.00143333	3.54154
FRA	MeOH	barge	570	land	2024	base_with_pipeline	3.46714	0.12768	0.00335	3.59817
FRA	LOHC	truck	570	land	2024	base_with_pipeline	3.54853	0.4446	0.00351	3.99664
FRA	LOHC	rail	570	land	2024	base_with_pipeline	3.54853	0.05472	0.003225	3.60647
FRA	LOHC	barge	570	land	2024	base_with_pipeline	3.54853	0.09576	0.0075375	3.65183
FRO	LH2	ship	5042.84	maritime	2024	base_with_pipeline	3.268	0.757953	0.926892	4.95284	0	none	0	4462.28	0.438642	580.565	barge	0.319311
FRO	NH3	ship	5042.84	maritime	2024	base_with_pipeline	2.916	0.281277	0.0333455	3.23062	0	none	0	4462.28	0.157965	580.565	barge	0.123312
FRO	MeOH	ship	5042.84	maritime	2024	base_with_pipeline	3.46714	0.308538	0.00904285	3.78472	0	none	0	4462.28	0.178491	580.565	barge	0.130047
FRO	LOHC	ship	5042.84	maritime	2024	base_with_pipeline	3.54853	0.231403	0.0203464	3.80028	0	none	0	4462.28	0.133868	580.565	barge	0.0975349
FSM	LH2	ship	16366.3	maritime	2024	base_with_pipeline	3.268	1.87105	2.08754	7.22659	0	none	0	15785.7	1.55173	580.565	barge	0.319311
FSM	NH3	ship	16366.3	maritime	2024	base_with_pipeline	2.916	0.682126	0.0751006	3.67323	0	none	0	15785.7	0.558814	580.565	barge	0.123312
FSM	MeOH	ship	16366.3	maritime	2024	base_with_pipeline	3.46714	0.761475	0.0203663	4.24898	0	none	0	15785.7	0.631428	580.565	barge	0.130047
FSM	LOHC	ship	16366.3	maritime	2024	base_with_pipeline	3.54853	0.571106	0.0458241	4.16546	0	none	0	15785.7	0.473571	580.565	barge	0.0975349
GAB	LH2	ship	8175.36	maritime	2024	base_with_pipeline	3.268	1.07285	1.24797	5.58883	13.8995	truck	0.0083397	7580.9	0.745202	580.565	barge	0.319311
GAB	NH3	ship	8175.36	maritime	2024	base_with_pipeline	2.916	0.405617	0.0448967	3.36651	13.8995	truck	0.0139412	7580.9	0.268364	580.565	barge	0.123312
GAB	MeOH	ship	8175.36	maritime	2024	base_with_pipeline	3.46714	0.447738	0.0121754	3.92706	13.8995	truck	0.0144555	7580.9	0.303236	580.565	barge	0.130047
GAB	LOHC	ship	8175.36	maritime	2024	base_with_pipeline	3.54853	0.335804	0.0273946	3.91173	13.8995	truck	0.0108416	7580.9	0.227427	580.565	barge	0.0975349
GBR	CH2	truck	1000	land	2024	base_with_pipeline	0.263158	3	0.48	3.74316
[truncated: 4,083 more rows]
