# Supplementary material for: Global cost drivers and regional trade-offs for low-carbon fuels: a prospective techno-economic assessment
Source: Royal Society of Chemistry journal article supplement (doi:10.1039/d5ee05591a), 2026-01-01
Supplement: d5ee05591a2.zip [file TEA input.xlsx]

## Sheet: TEA data
tech	sub	Base_2024	Base_2030	2 degree_2030	1.5 degree_2030	Base_2050	2 degree_2050	1.5 degree_2050
PEM	capex	1200	928.45	788.93	670.74	754.53	558.35	517.1
PEM	om	0.05	0.05	0.05	0.05	0.05	0.05	0.05
PEM	lt	60000	71428.6	74285.7	78571.4	100000	110000	125000
PEM	eff	0.58	0.614286	0.622857	0.628571	0.7	0.73	0.75
AE	capex	800	690.91	629.52	573.76	613.68	516.68	494.51
AE	om	0.03	0.03	0.03	0.03	0.03	0.03	0.03
AE	lt	75000	82142.9	85000	89285.7	100000	110000	125000
AE	eff	0.67	0.678571	0.69	0.701429	0.7	0.74	0.78
SOEC	capex	2500	2281.11	1852.84	1340.5	2118.23	1447.45	1014.43
SOEC	om	0.05	0.05	0.05	0.05	0.05	0.05	0.05
SOEC	lt	20000	37142.9	38571.4	40000	80000	85000	90000
SOEC	eff	0.88	0.88	0.885714	0.885714	0.88	0.9	0.9
HTSE	capex	2500	2306.7	1985.82	1390.26	1709.58	995.27	554.22
HTSE	om	0.05	0.05	0.05	0.05	0.05	0.05	0.05
HTSE	lt	20000	37142.9	38571.4	40000	80000	85000	90000
HTSE	eff	0.88	0.88	0.885714	0.885714	0.88	0.9	0.9
CuCl	capex	500	445.63	397.16	353.97	441.58	370.57	300.19
CuCl	om	0.05	0.05	0.05	0.05	0.05	0.05	0.05
CuCl	lt	87600	87600	87600	87600	87600	87600	87600
CuCl	eff	0.43	0.53	0.53	0.53	0.63	0.63	0.63
SMR_CCS	capex	1674	1591.55	1376.52	1173.37	1523.56	1203.99	929.55
SMR_CCS	om	0.05	0.05	0.05	0.05	0.05	0.05	0.05
SMR_CCS	lt	219000	219000	219000	219000	219000	219000	219000
SMR_CCS	eff	0.7	0.7	0.742857	0.742857	0.7	0.85	0.85
ATR_CCS	capex	1307	1253.76	1087.12	911.46	1194.66	941.94	739.39
ATR_CCS	om	0.05	0.05	0.05	0.05	0.05	0.05	0.05
ATR_CCS	lt	219000	219000	219000	219000	219000	219000	219000
ATR_CCS	eff	0.7	0.7	0.714286	0.714286	0.7	0.75	0.75
CLR	capex	1200	1159.12	974.7	777.84	1081.5	802.35	612.03
CLR	om	0.05	0.05	0.05	0.05	0.05	0.05	0.05
CLR	lt	219000	219000	219000	219000	219000	219000	219000
CLR	eff	0.75	0.75	0.75	0.75	0.75	0.75	0.75
M_PYR	capex	1500	1384.02	1111.7	862.55	1099.37	673.56	418.07
M_PYR	om	0.05	0.05	0.05	0.05	0.05	0.05	0.05
M_PYR	lt	219000	219000	219000	219000	219000	219000	219000
M_PYR	eff	0.6	0.6	0.628571	0.657143	0.6	0.7	0.8
TG_CCS	capex	800	746.6	553.46	401.75	682.43	460.35	282.53
TG_CCS	om	0.06	0.06	0.06	0.06	0.06	0.06	0.06
TG_CCS	lt	262800	262800	262800	262800	262800	262800	262800
TG_CCS	eff	0.6	0.6	0.6	0.6	0.6	0.6	0.6
SR_FT	capex	1030	886.72	649.89	465.25	704.35	410.05	219.42
SR_FT	om	0.05	0.05	0.05	0.05	0.05	0.05	0.05
SR_FT	lt	219000	219000	219000	219000	219000	219000	219000
SR_FT	eff	0.64	0.64	0.64	0.64	0.64	0.64	0.64
ST_FT	capex	1800	1660.83	1334.04	1035.06	1319.24	841.72	452.14
ST_FT	om	0.04	0.04	0.04	0.04	0.04	0.04	0.04
ST_FT	lt	219000	219000	219000	219000	219000	219000	219000
ST_FT	eff	0.45	0.45	0.45	0.45	0.45	0.45	0.45
TG_FT	capex	1787	1538.41	1127.52	807.18	1371.11	895.62	571.44
TG_FT	om	0.05	0.05	0.05	0.05	0.05	0.05	0.05
TG_FT	lt	219000	219000	219000	219000	219000	219000	219000
TG_FT	eff	0.5	0.5	0.5	0.5	0.5	0.5	0.5
RWGS_FT	capex	1212	1043.4	804.8	566.08	929.94	618.86	408
RWGS_FT	om	0.03	0.03	0.03	0.03	0.03	0.03	0.03
RWGS_FT	lt	219000	219000	219000	219000	219000	219000	219000
RWGS_FT	eff	0.65	0.65	0.675714	0.675714	0.65	0.74	0.74
RWGS_MeOH	capex	799.2	712.296	568.776	414.192	634.824	437.904	298.512
RWGS_MeOH	om	0.03	0.03	0.03	0.03	0.03	0.03	0.03
RWGS_MeOH	lt	219000	219000	219000	219000	219000	219000	219000
RWGS_MeOH	eff	0.78	0.78	0.78	0.78	0.78	0.78	0.78
HTL	capex	2100	1896.29	1374.48	936.17	1791.38	1143.24	693.99
HTL	om	0.05	0.05	0.05	0.05	0.05	0.05	0.05
HTL	lt	219000	219000	219000	219000	219000	219000	219000
HTL	eff	0.45	0.45	0.45	0.45	0.5	0.5	0.5
HVO	capex	2000	1906.38	1669.51	1409.54	1822.85	1509.67	1292.22
HVO	om	0.05	0.05	0.05	0.05	0.05	0.05	0.05
HVO	lt	219000	219000	219000	219000	219000	219000	219000
HVO	eff	0.8	0.8	0.8	0.8	0.8	0.8	0.8
B_PYR	capex	1200	1111.66	946.16	776.36	1062.95	855.57	711.74
B_PYR	om	0.05	0.05	0.05	0.05	0.05	0.05	0.05
B_PYR	lt	219000	219000	219000	219000	219000	219000	219000
B_PYR	eff	0.4	0.4	0.4	0.4	0.45	0.45	0.45
PTM	capex	320	309.1	267.51	211.12	298.57	205.7	152.16
PTM	om	0.1	0.1	0.1	0.1	0.1	0.1	0.1
PTM	lt	219000	219000	219000	219000	219000	219000	219000
PTM	eff	0.85	0.85	0.85	0.85	0.85	0.85	0.85
AD	capex	1200	1159.12	1013.78	844.55	1062.52	891.16	746.87
AD	om	0.05	0.05	0.05	0.05	0.05	0.05	0.05
AD	lt	219000	219000	219000	219000	219000	219000	219000
AD	eff	0.58	0.58	0.58	0.58	0.58	0.58	0.58
HB	capex	515	511.91	508.69	504.78	509.95	505	498.85
HB	om	0.03	0.03	0.03	0.03	0.03	0.03	0.03
HB	lt	219000	219000	219000	219000	219000	219000	219000
HB	eff	0.7	0.7	0.7	0.7	0.7	0.7	0.7
DAC	capex	1384	1099.35	796.41	446.66	979.8	652.83	339.05
DAC	om	0.12	0.12	0.12	0.12	0.12	0.12	0.12
DAC	lt	219000	219000	219000	219000	219000	219000	219000
DAC	eff	0.5	0.58	0.58	0.58	0.78	0.78	0.78

## Sheet: f_wacc_t
tech	Base_2024	Base_2030	2 degree_2030	1.5 degree_2030	Base_2050	2 degree_2050	1.5 degree_2050
AD	1.4408	1.2366	1.0376	1.0264	1.019	1.0103	1.0093
AE	1.3737	1.0776	1.0525	1.0274	1.0456	0.999	0.9871
ATR_CCS	1.3533	1.071	1.0516	1.0424	1.0355	1.0128	1.0082
B_PYR	1.6682	1.4797	1.3173	1.0392	1.0495	1.0283	1.0265
CLR	1.5586	1.3787	1.1891	1.0257	1.0408	1	0.9918
CuCl	1.6758	1.4659	1.3263	1.0581	1.054	1.0428	1.034
DAC	1.7431	1.4659	1.2665	0.9677	1.0065	0.9514	0.9208
HB	0.9843	0.9795	0.9778	0.9751	0.9764	0.9756	0.9728
HTL	1.4516	1.1636	1.121	1.1009	1.1218	1.0714	1.0523
HTSE	1.6875	1.5154	1.3507	1.1484	1.0712	1.037	1.0205
HVO	1.5472	1.3261	1.119	1.1086	1.1177	1.098	1.0968
M_PYR	1.7431	1.5914	1.4317	1.1285	1.0736	1.0338	1.0228
PEM	1.3565	1.0633	1.0387	1.0142	1.032	0.9863	0.9746
PTM	1.5078	1.2972	1.0886	1.0696	1.0962	1.0332	1.0245
RWGS_FT	1.5696	1.2972	1.0886	1.0696	1.0614	1.0332	1.0245
RWGS_MeOH	1.5696	1.3138	1.1031	1.0838	1.0764	1.0481	1.0389
SMR_CCS	1.3294	1.0434	1.0278	1.0229	1.0113	0.9915	0.9847
SOEC	1.6289	1.4143	1.2278	1.0522	1.0691	1.0233	1.013
SR_FT	1.6875	1.5154	1.3507	1.1671	1.1215	1.0863	1.0634
ST_FT	1.7431	1.5914	1.4507	1.1588	1.1252	1.0938	1.0581
TG_CCS	1.4516	1.1371	1.0863	1.0717	1.071	1.0366	1.0143
TG_FT	1.6319	1.3525	1.126	1.112	1.1111	1.0778	1.065

## Sheet: f_wacc_c
ISO_A3_EH	f_wacc_c
UAE	0.764219
ALB	1.18141
DZA	1.10266
AND	0.912344
AGO	1.57266
AIA	1.51453
ATG	1.51422
ARG	2.31203
ARM	1.18141
ABW	0.993594
AUS	0.697656
AUT	0.751719
AZE	1.03453
BHS	1.30359
BHR	1.43797
BGD	1.43797
BRB	1.57266
BLR	3.07547
BEL	0.777969
BLZ	1.70703
BEN	1.30359
BMU	0.811719
BOL	2.04391
BIH	1.57266
BWA	0.859219
BRA	1.03453
VGB	1.51453
BRN	0.777969
BGR	0.912344
BFA	1.70703
KHM	1.43797
CMR	1.70703
CAN	0.697656
CPV	1.43797
CYM	0.777969
CHL	0.811719
CHN	0.792656
COL	0.954219
COD	1.57266
COG	1.90953
COK	1.30359
CRI	1.18141
HRV	0.859219
CUB	2.31203
CUW	0.993594
CYP	0.859219
CZE	0.777969
DNK	0.697656
DOM	1.18141
ECU	2.04391
EGY	1.70703
SLV	1.57266
EST	0.792656
ETH	1.90953
FLK	1.18391
FJI	1.30359
FIN	0.751719
FRA	0.777969
GUF	1.18391
GAB	1.90953
GMB	1.30359
GEO	1.10266
DEU	0.697656
GHA	1.90953
GIB	0.810469
GRC	1.03453
GRL	0.810469
GTM	1.03453
GGY	0.792656
GIN	1.90953
GNB	1.57266
GUY	0.912344
HTI	2.31203
HND	1.30359
HKG	0.777969
HUN	0.954219
ISL	0.792656
IND	0.993594
IDN	0.954219
IRN	1.57266
IRQ	1.70703
IRL	0.777969
IMN	0.777969
ISR	0.912344
ITA	0.993594
CIV	1.10266
JAM	1.30359
JPN	0.792656
JEY	0.764219
JOR	1.18141
KAZ	0.912344
KEN	1.70703
PRK	2.31203
KWT	0.792656
KGZ	1.57266
LAO	2.04391
LVA	0.859219
LBN	3.07547
LBR	1.90953
LBY	0.912344
LIE	0.697656
LTU	0.811719
LUX	0.697656
MAC	0.777969
MKD	1.18141
MDG	1.43797
MWI	1.90953
MYS	0.859219
MDV	1.90953
MLI	1.90953
MLT	0.811719
MTQ	1.51453
MUS	0.993594
MEX	0.954219
MDA	1.57266
MCO	0.697656
MNG	1.43797
MNE	1.30359
MSR	0.993594
MAR	1.03453
MOZ	1.90953
MMR	2.04391
NAM	1.30359
NPL	1.18141
NLD	0.697656
NZL	0.697656
NIC	1.43797
NER	2.04391
NGA	1.70703
NOR	0.697656
OMN	1.03453
PAK	1.90953
PSE	3.07547
PAN	0.993594
PNG	1.43797
PRY	0.993594
PER	0.912344
PHL	0.954219
POL	0.811719
PRT	0.859219
QAT	0.764219
REU	0.842969
ROU	0.993594
RUS	1.10266
RWA	1.43797
LCA	1.51453
SAU	0.777969
SEN	1.30359
SRB	1.10266
SLE	1.90953
SGP	0.697656
SVK	0.859219
SVN	0.859219
SLB	1.70703
SOM	2.04391
ZAF	1.10266
KOR	0.764219
ESP	0.912344
LKA	2.31203
SDN	3.07547
SUR	1.70703
SWZ	1.43797
SWE	0.697656
CHE	0.697656
SYR	3.07547
TWN	0.777969
TJK	1.57266
TZA	1.30359
THA	0.912344
TUN	1.90953
TUR	1.30359
TCA	0.912344
UGA	1.57266
UKR	2.31203
ARE	0.764219
GBR	0.777969
USA	0.697656
URY	0.912344
UZB	1.18141
VEN	3.07547
VNM	1.10266
YEM	2.31203
ZMB	1.90953
ZWE	1.90953

## Sheet: energy and material balance
tech	m_pw	m_bio	m_iw	m_co2	m_ng	m_h2	e_elec	e_heat
PEM	0.4054	0	0	0	0	0	1	0
AE	0.4054	0	0	0	0	0	1	0
SOEC	0.4054	0	0.0120087	0	0	0	0.8	0.2
HTSE	0.4054	0	0	0	0	0	0.8	0.2
CuCl	0.4054	0	0	0	0	0	0.29	0.71
SMR_CCS	0	0	0.20102	0	0.072	0	0.1326	0
ATR_CCS	0	0	0.20102	0	0.09	0	0.10711	0
CLR	0	0	0	0	0.108	0	0.0921	0
M_PYR	0	0	0	0	0.106426	0	0.168116	0
TG_CCS	0	0.391667	0	0	0	0	0	0
SR_FT	0.108	0	0	0	0.0658	0	0.08	0.236
ST_FT	0.06	0	0	0.1222	0	0	0.15	1
TG_FT	0	0.31	0.106	0	0	0.00246	0	0
RWGS_FT	0	0	0	0.254	0	0.0246	0.02	0
RWGS_MeOH	0	0	0	0.2506	0	0.03	0.0246	0
HTL	0.0013	0.224	0	0	0	0.008	0	0
HVO	0	0.097	0	0	0	0.0015	0	0
B_PYR	0	0.212	0	0	0	0.018	0.0559339	0
PTM	0	0	0	0.2	0	0.038	0.01	0
AD	0	0.48	0	0	0	0	0.06	0.1
HB	0	0	0	0	0	0.0345	0.096	0
DAC	0	0	0	0	0	0	0.25	1.75

## Sheet: lcoe
ISO_A3_EH	Base_2024	Base_2030	2 degree_2030	1.5 degree_2030	Base_2050	2 degree_2050	1.5 degree_2050
AFG	0.0546057	0.0484999	0.0412008	0.0342863	0.0428852	0.0352054	0.0282111
ALB	0.0796113	0.073605	0.0628238	0.0562235	0.0661288	0.053573	0.0486157
DZA	0.0571613	0.0501148	0.0440678	0.035395	0.0469183	0.0390565	0.0275692
AGO	0.0492724	0.0481268	0.0508643	0.047728	0.0492916	0.0504013	0.046653
ATA	0.0654543	0.0774872	0.0890784	0.0908844	0.101817	0.115327	0.110023
ARG	0.06068	0.0538496	0.0472337	0.0411176	0.0547086	0.0481178	0.0380792
ARM	0.0586043	0.0599225	0.0552855	0.0475337	0.0577755	0.0491942	0.0434386
AUS	0.0553249	0.0486116	0.0373754	0.0327053	0.0373722	0.0295539	0.0268988
AUT	0.0697875	0.0615862	0.0504688	0.0415203	0.053013	0.0431552	0.0368412
AZE	0.0588644	0.0602611	0.0564727	0.0491596	0.058557	0.0552149	0.0485474
BGD	0.0566519	0.053435	0.0479273	0.0409462	0.0541461	0.0515163	0.0439224
BLR	0.0590921	0.0607411	0.0569472	0.0487211	0.0624203	0.0509306	0.0420907
BEL	0.0655428	0.0566141	0.0448626	0.0362111	0.0430872	0.0335612	0.0286878
BLZ	0.0642891	0.0580974	0.0535043	0.050373	0.0531381	0.0523055	0.0467161
BEN	0.0491015	0.0470013	0.0469857	0.0429745	0.0509098	0.0509145	0.042175
BTN	0.0564414	0.053193	0.0488754	0.0440702	0.0531479	0.0506075	0.045138
BOL	0.0643632	0.0578275	0.05071	0.045215	0.0534667	0.0526013	0.0452963
BIH	0.0844935	0.0798911	0.0706748	0.0628858	0.0755412	0.0681332	0.0598991
BWA	0.0465596	0.0421644	0.0402979	0.0363717	0.0405277	0.0358959	0.0298907
BRA	0.0596841	0.0522043	0.0465272	0.0436414	0.045789	0.0424948	0.0376299
BRN	0.0564569	0.0532232	0.0489146	0.0441013	0.0532214	0.0506744	0.0451811
BGR	0.0731755	0.0655492	0.0549382	0.0457932	0.0609534	0.0508761	0.0434554
BFA	0.0477169	0.0443712	0.0433515	0.0394329	0.0462896	0.0427511	0.0355695
BDI	0.0495587	0.0486537	0.0515842	0.0509674	0.0510098	0.052026	0.0477044
KHM	0.0562359	0.0526778	0.0469529	0.040202	0.0521727	0.0497196	0.043018
CMR	0.0494915	0.04853	0.0514152	0.0508428	0.0506065	0.0516446	0.0474576
CAN	0.0558	0.0495467	0.0388077	0.0337479	0.0400576	0.0319231	0.0283351
CAF	0.049378	0.0483211	0.0511298	0.0506323	0.0499253	0.0510005	0.0470408
TCD	0.0454314	0.0399913	0.0372803	0.0331286	0.0352455	0.0291314	0.0239501
CHL	0.0546944	0.0435616	0.0354429	0.0321312	0.0351375	0.0287685	0.0247214
COL	0.0597651	0.0523752	0.0467334	0.0437848	0.0461486	0.0428187	0.0378322
CRI	0.0643887	0.0582541	0.0511606	0.0456097	0.0535799	0.0527033	0.0459227
HRV	0.073091	0.0654638	0.0548394	0.0456013	0.0607118	0.0505307	0.0430336
CUB	0.0633379	0.0567488	0.050012	0.0439632	0.0584072	0.0534485	0.0428756
CYP	0.075844	0.0686287	0.0584195	0.0494248	0.0673437	0.0574339	0.0494656
CZE	0.0703889	0.06231	0.0512811	0.0421499	0.0543565	0.0442948	0.0376273
COD	0.0495051	0.0485549	0.0514492	0.0508679	0.0506876	0.0517213	0.0475073
DNK	0.063585	0.0543331	0.0422883	0.0336845	0.0374692	0.0289966	0.0246928
DJI	0.0454243	0.039976	0.0372584	0.0330905	0.0352345	0.0290829	0.0238851
DOM	0.0619001	0.0535033	0.0460398	0.0412735	0.0510651	0.0472878	0.0391402
TLS	0.056046	0.0520833	0.046156	0.0394642	0.0512719	0.0488995	0.0414751
ECU	0.0613218	0.0589285	0.05464	0.0492812	0.0566437	0.0552326	0.0455902
EGY	0.0567752	0.0492072	0.0417956	0.0330899	0.0437144	0.0329229	0.0232995
SLV	0.0638347	0.0571387	0.0523475	0.0492152	0.051121	0.0504893	0.0455811
GNQ	0.0499366	0.0493492	0.0525342	0.0516682	0.0532774	0.0541701	0.049092
ERI	0.046383	0.0418182	0.0398143	0.0357928	0.0397928	0.0348144	0.0288494
EST	0.0688295	0.0605351	0.0492698	0.0398704	0.0505417	0.0401808	0.0336418
SWZ	0.0474602	0.0438598	0.0426331	0.0384933	0.0453483	0.0411483	0.0339028
ETH	0.0488334	0.0464753	0.0462506	0.0420888	0.0518397	0.0492709	0.0405837
FLK	0.0591593	0.0666928	0.0758928	0.0764982	0.085296	0.0916761	0.0868601
FJI	0.0557327	0.0507995	0.0442224	0.0368466	0.0489488	0.0412986	0.0325861
FIN	0.0748167	0.0784774	0.0793813	0.0771239	0.083358	0.0806707	0.0776726
FRA	0.066013	0.057135	0.0454557	0.0369895	0.043284	0.0349647	0.0301634
ATF	0.0613164	0.0753189	0.0906631	0.0974736	0.110272	0.125907	0.123734
GAB	0.0499927	0.0494523	0.0526751	0.0517721	0.0536138	0.0544882	0.0492978
GEO	0.0586677	0.0600283	0.055503	0.047693	0.0583706	0.0494457	0.0432929
DEU	0.0650146	0.055982	0.0441525	0.035636	0.0408958	0.0325205	0.0279304
GHA	0.050466	0.0503235	0.0538651	0.0526499	0.0564543	0.0571741	0.0510359
GRC	0.0724754	0.0646974	0.053984	0.0451198	0.0594199	0.049656	0.0427192
GRL	0.0789815	0.0808485	0.0816033	0.0826184	0.0915282	0.0885757	0.0890769
GTM	0.0641296	0.0577608	0.0530981	0.0505758	0.0524299	0.0516678	0.0463176
GIN	0.0493949	0.0483521	0.0511722	0.0506636	0.0500265	0.0510962	0.0471027
GUY	0.0642737	0.0580649	0.0534651	0.0508309	0.0530698	0.052244	0.0466777
HTI	0.0606711	0.0520162	0.0445395	0.0398573	0.0492424	0.0445367	0.0368228
HND	0.0637702	0.0570026	0.0497202	0.0446366	0.0508347	0.0502316	0.0445733
HUN	0.0689551	0.060607	0.0493655	0.0405051	0.0510797	0.0413203	0.0353205
ISL	0.079597	0.0816171	0.0825089	0.0834225	0.0926898	0.0903648	0.090495
IND	0.079963	0.06813	0.0609104	0.0532926	0.0577151	0.0505773	0.0415826
IDN	0.0557442	0.0513301	0.0468273	0.0409738	0.0505793	0.0469238	0.0410009
IRN	0.0575777	0.0506229	0.0459194	0.0375119	0.0479674	0.0466043	0.0341059
IRQ	0.0571156	0.049949	0.0437245	0.0350762	0.046241	0.038445	0.0273021
IRL	0.0667851	0.0581899	0.046616	0.0369977	0.0455995	0.0349947	0.028765
ISR	0.0566247	0.0483917	0.0403225	0.0318296	0.0401048	0.0314493	0.0235326
ITA	0.0720516	0.0641923	0.0534162	0.044645	0.0574571	0.0487971	0.0420714
CIV	0.049677	0.0488713	0.0518814	0.0491331	0.0517193	0.0526968	0.0481385
JAM	0.0617115	0.0537196	0.0464641	0.0413611	0.0523905	0.0477342	0.039087
JPN	0.100381	0.0949481	0.0880774	0.0805742	0.089236	0.0700131	0.0622159
JOR	0.056818	0.0491379	0.0418311	0.0332121	0.043201	0.0339393	0.02447
KAZ	0.0582889	0.0596024	0.0535676	0.0446443	0.058377	0.0371828	0.0318547
KEN	0.047536	0.0439779	0.0427836	0.0383788	0.0461331	0.0414981	0.0337828
KWT	0.0563806	0.0484303	0.0396651	0.0308522	0.0412103	0.0263558	0.0183176
KGZ	0.05859	0.0599056	0.0552147	0.0474261	0.0577627	0.0487702	0.0430514
LAO	0.0562889	0.052339	0.0464146	0.0393765	0.053371	0.0494699	0.0399413
LVA	0.0692361	0.0610187	0.0498138	0.0403317	0.0514682	0.0410152	0.0342806
LBN	0.0588632	0.0540387	0.0553995	0.0485435	0.0593628	0.0679684	0.0519416
LSO	0.0464868	0.0420257	0.0401061	0.0361811	0.0401627	0.0354652	0.0295364
LBR	0.0497629	0.0490294	0.0520974	0.051346	0.0522348	0.0531842	0.048454
LBY	0.0564388	0.0485293	0.0399593	0.0311698	0.0415002	0.0273539	0.019115
LTU	0.067515	0.0590086	0.0475461	0.0381414	0.0474244	0.0370579	0.0308617
LUX	0.0671811	0.0585525	0.0470445	0.0381371	0.0468551	0.0370435	0.0314641
MDG	0.0471318	0.043249	0.0417955	0.0378075	0.0434772	0.0392608	0.032577
MWI	0.0474115	0.0437789	0.042527	0.0385074	0.0449209	0.0409047	0.033887
MYS	0.056322	0.0529593	0.0495727	0.0448306	0.0555811	0.0590915	0.0498049
MLI	0.0456441	0.0403927	0.0378338	0.0336433	0.0363657	0.0303758	0.024919
MRT	0.0450272	0.0392127	0.0361992	0.0319673	0.033352	0.0267079	0.0218227
MEX	0.0608163	0.0522586	0.044815	0.0400704	0.0496957	0.0449921	0.037142
MDA	0.0584019	0.0597543	0.0540687	0.0453021	0.0588029	0.0395493	0.0337893
MNG	0.0550146	0.0491148	0.0419168	0.0345281	0.0434448	0.0346133	0.0269783
MNE	0.0805642	0.075048	0.0647593	0.0577786	0.0696709	0.0572597	0.0511114
MAR	0.0565681	0.048765	0.0406336	0.0318884	0.0422242	0.0295444	0.020826
MOZ	0.0487179	0.0462771	0.0459871	0.0420449	0.0500348	0.0486693	0.0404256
MMR	0.0573026	0.0548769	0.0510572	0.045797	0.0572332	0.0543271	0.0475388
NAM	0.0463954	0.0418855	0.0399289	0.0363459	0.0391817	0.0350518	0.0297229
NPL	0.0563601	0.0530339	0.0486693	0.0439071	0.052762	0.0502561	0.0449112
NLD	0.0639537	0.0547491	0.0427604	0.0342469	0.0381252	0.0300112	0.0257055
NCL	0.0552236	0.0495545	0.0425002	0.0350446	0.044669	0.0359138	0.0279612
NZL	0.0556148	0.0494365	0.0387215	0.0336311	0.0400753	0.0317221	0.0280903
NIC	0.0614657	0.0541059	0.0471705	0.0415468	0.0540053	0.0485198	0.0390885
NER	0.0454757	0.0400762	0.037398	0.0332512	0.0354589	0.0293955	0.0241761
NGA	0.0481503	0.0451821	0.0444659	0.040395	0.0486852	0.04526	0.0374084
PRK	0.0555387	0.0503563	0.0436202	0.0362577	0.0475513	0.0396456	0.0312252
MKD	0.0810301	0.0754127	0.0649875	0.0581213	0.0690558	0.0578279	0.0519271
NOR	0.0770334	0.0706079	0.0594981	0.0531276	0.0627901	0.0468831	0.0429401
OMN	0.0565371	0.0486185	0.0403574	0.0316455	0.041591	0.0291969	0.0207844
PAK	0.0563889	0.0525159	0.0466358	0.0395188	0.0539657	0.0496644	0.0399811
PSE	0.0568688	0.0490486	0.0418647	0.033352	0.0425551	0.0351619	0.0258905
PAN	0.0639031	0.0555998	0.0482383	0.0432223	0.0514247	0.0507628	0.0422495
PNG	0.0566873	0.0536737	0.0494983	0.0445632	0.0543142	0.0516693	0.0458234
PRY	0.0574567	0.0481292	0.040619	0.0361548	0.0436306	0.037346	0.0307634
CHN	0.0620279	0.0535545	0.043456	0.0320366	0.0440748	0.0323667	0.0285648
PER	0.0635328	0.0565017	0.051579	0.0495198	0.0497808	0.0492827	0.044827
PHL	0.0558233	0.0512787	0.0459754	0.038974	0.0546362	0.050547	0.0417196
POL	0.0670305	0.0583905	0.0468591	0.0378575	0.0464563	0.0365396	0.0309
PRT	0.0682369	0.0597339	0.0483873	0.0398095	0.049504	0.04006	0.0345508
PRI	0.0603341	0.051744	0.0443277	0.0395619	0.0490587	0.0440472	0.0362796
QAT	0.0565541	0.0487226	0.0405391	0.0317974	0.0420595	0.0293408	0.0207102
COG	0.0498539	0.049197	0.0523263	0.0515149	0.0527813	0.053701	0.0487884
ROU	0.0739163	0.0664319	0.0559307	0.0466245	0.062637	0.0523798	0.0445916
RUS	0.0585013	0.0598775	0.0545413	0.0459859	0.0589983	0.0431711	0.037109
RWA	0.0494467	0.0484475	0.0513025	0.0507597	0.0503375	0.0513903	0.047293
SAU	0.0564124	0.0486547	0.0405303	0.0318549	0.0413996	0.0300269	0.0215448
SEN	0.0467758	0.0425898	0.040893	0.0371006	0.0414007	0.0372258	0.0311968
SRB	0.0790039	0.0729762	0.0622032	0.0555889	0.0658749	0.0522769	0.0473702
SLE	0.0496165	0.0487601	0.0517295	0.0510746	0.0513566	0.0523539	0.0479166
SVK	0.0721762	0.0643876	0.0536268	0.0444864	0.0585875	0.0485154	0.0413645
SVN	0.0750849	0.0677871	0.0574614	0.0481726	0.0654138	0.0551759	0.0470965
SLB	0.0566902	0.0536794	0.0484591	0.0415145	0.054328	0.0516819	0.0454242
SOM	0.0455325	0.0401822	0.0375436	0.0333743	0.0357766	0.0297233	0.0244123
ZAF	0.0464463	0.0419592	0.0400193	0.0362019	0.0397952	0.0352654	0.0295375
KOR	0.0556111	0.0504736	0.0437615	0.0363267	0.048713	0.0416474	0.0311141
SSD	0.0493836	0.0477098	0.047974	0.0441269	0.0499587	0.0510321	0.0442566
ESP	0.0668084	0.0593461	0.048878	0.0403684	0.042601	0.0369465	0.034882
LKA	0.0567442	0.0528197	0.0468585	0.0390075	0.0540637	0.0462081	0.0359501
SDN	0.0564919	0.0486477	0.0402638	0.031482	0.0419079	0.0282112	0.0197295
SUR	0.0642161	0.0579433	0.0533183	0.0507289	0.0528139	0.0520136	0.0465337
SWE	0.0682328	0.0597935	0.0484419	0.0393949	0.0492849	0.0393173	0.0333108
CHE	0.0787778	0.0723809	0.061211	0.05491	0.0632924	0.050486	0.0464779
SYR	0.0566067	0.0488012	0.0407914	0.0320762	0.0422657	0.030266	0.0214771
TJK	0.0584566	0.0597383	0.0545868	0.046529	0.0574655	0.0453573	0.040059
TZA	0.0493552	0.0473826	0.0475215	0.0436767	0.0497885	0.0508711	0.0434203
THA	0.055732	0.0511442	0.0449004	0.0383145	0.0497823	0.0475432	0.0391237
BHS	0.0574649	0.0479794	0.0403938	0.0360546	0.0431671	0.0370521	0.0306702
GMB	0.0473282	0.0436178	0.042303	0.0382605	0.0445402	0.0404028	0.0334368
TGO	0.0495907	0.0487125	0.0503017	0.0463957	0.0512014	0.0522071	0.0478216
TTO	0.060694	0.0522342	0.0448475	0.0400142	0.0498513	0.0449597	0.0369955
TUN	0.0569989	0.0497414	0.0431227	0.034432	0.0456136	0.0364597	0.0257387
TUR	0.0808252	0.0753181	0.0648675	0.0580207	0.0688635	0.0575957	0.0517585
TKM	0.0581151	0.0593503	0.0528546	0.0438217	0.0574017	0.0345131	0.0299884
UGA	0.0495116	0.0485669	0.0514656	0.05088	0.0507268	0.0517584	0.0475312
UKR	0.0589039	0.0604665	0.0561793	0.0478449	0.0613385	0.048115	0.0401565
ARE	0.0564588	0.0486475	0.0405941	0.0319533	0.0414773	0.0305593	0.0220965
GBR	0.0647269	0.055685	0.0438098	0.035022	0.0398941	0.031415	0.026613
USA	0.0679688	0.0555304	0.0455316	0.0344778	0.0394059	0.0316777	0.0295569
URY	0.0545643	0.0439562	0.036097	0.0323599	0.0365612	0.029556	0.0248516
UZB	0.0581525	0.0593994	0.0530231	0.0440491	0.0575249	0.0353468	0.0306871
VUT	0.0563666	0.0522579	0.0462078	0.038803	0.0535918	0.0468312	0.0371652
VEN	0.0657536	0.0660696	0.0631227	0.0575445	0.0632239	0.0674073	0.0561538
VNM	0.0561928	0.0518926	0.0457232	0.0383747	0.0525768	0.0457552	0.0363534
ESH	0.058573	0.0602023	0.0788795	0.0924203	0.085043	0.121415	0.115134
YEM	0.0583647	0.0523793	0.0512592	0.0431694	0.0532066	0.0584017	0.0457959
ZMB	0.0487471	0.0463491	0.0460949	0.0423186	0.0487741	0.0489038	0.0408757
ZWE	0.0478674	0.0446634	0.0437583	0.039894	0.0469568	0.0436621	0.0364063

## Sheet: lcoe_nuc
ISO_A3_EH	lcoe_nuc
JPN	0.08667
KOR	0.0533
RUS	0.04202
FRA	0.03065
USA	0.03325
SWE	0.02818
CHE	0.0296
IND	0.04764
SVK	0.10184
CHN	0.059
CAN	0.068
GBR	0.062
CAN	0.06
UKR	0.0375
ESP	0.058
BEL	0.06
HUN	0.041
FIN	0.051
CZE	0.05
BGR	0.042
ROU	0.0435
PAK	0.05
ARG	0.055
BRA	0.06
ZAF	0.07
NLD	0.07
IRN	0.0725
MEX	0.063
ARE	0.05
ARM	0.0425
SVN	0.046

## Sheet: lcoe_csp
ISO_A3_EH	lcoe_csp
ESP	0.118
USA	0.123
CHN	0.128
ARE	0.133
ZAF	0.138
MAR	0.143
IND	0.148
CHL	0.153
SAU	0.158
KWT	0.163
DZA	0.168
EGY	0.173
ITA	0.178
MEX	0.183
FRA	0.188
DNK	0.193
THA	0.198
AUS	0.203
DEU	0.208
TUR	0.213

## Sheet: bio_lig
ISO_A3	price (per kg)
ARG	0.0406614
AUT	0.113082
BRA	0.0397144
CAN	0.0892592
CHL	0.0414579
CHN	0.0342493
CZE	0.0625571
DNK	0.13233
EGY	0.0314965
FIN	0.0891484
FRA	0.128582
GAB	0.0590253
DEU	0.10133
GHA	0.0566446
GRC	0.0895802
HUN	0.0751084
IND	0.0464634
IRL	0.109863
ITA	0.0760547
JPN	0.15594
KEN	0.0977636
LTU	0.0761373
MYS	0.0228312
MLI	0.0479362
MEX	0.0346904
MOZ	0.0380588
NAM	0.0409883
NIC	0.0303488
NOR	0.0642179
POL	0.0774681
RUS	0.0735861
SEN	0.0217595
ESP	0.114946
SWE	0.0824474
THA	0.0309298
NLD	0.088606
TGO	0.0409833
GBR	0.118531
USA	0.0844582
UGA	0.024722
UKR	0.0877286

## Sheet: opex
ISO_A3	value
AFG	0.473143
ALB	0.933348
DZA	0.569452
AND	2.11167
AGO	0.270685
ATG	0.844851
ARG	0.683353
ARM	0.572669
AUS	3.20869
AUT	0.786395
BHS	1.22404
BHR	1.91338
BGD	0.455939
BRB	0.651736
BLR	0.921391
BEL	3.06478
BLZ	1.13145
BEN	0.313998
BTN	0.216136
BOL	1.29704
BES	0.930057
BWA	0.426507
BRA	0.673048
BGR	1.33548
BFA	0.271446
BDI	0.00485906
CPV	0.339521
KHM	0.00015884
CMR	0.25489
CAN	2.84351
CAF	0.160732
TCD	0.303252
CHL	1.15564
CHN	0.654062
COL	0.89214
COM	0.290218
COG	0.622582
COD	0.238372
CRI	1.26847
CIV	0.385202
HRV	1.68788
CYP	1.90044
CZE	1.36327
DNK	2.6
DMA	1.2047
DOM	0.994294
ECU	1.22947
EGY	1.03858
SLV	0.91454
GNQ	0.56739
EST	1.34209
ETH	1.2
SWZ	0.0816607
FIN	2.13874
FJI	1.23578
FRA	2.76045
GAB	0.63687
GMB	0.08068
GEO	0.0223832
DEU	3.32759
GHA	0.120188
GRC	1.91366
GRD	0.848126
GTM	1.15827
GIN	0.184676
GNB	0.100033
GUY	0.750309
HTI	0.201041
HND	1.11783
HKG	1.42768
HUN	1.57659
ISL	3.05433
IND	0.279894
IDN	1.14681
IRN	0.560293
IRQ	0.88222
IRL	2.66484
ITA	1.44
ISR	1.80463
JAM	0.805673
JPN	2.13874
JOR	0.974049
KAZ	0.601085
KEN	0.434613
KIR	0.349021
KWT	0.491053
KGZ	0.103072
LAO	0.344098
LVA	1.44702
LBN	0.413368
LSO	0.368704
LBR	0.227564
LBY	0.665723
LTU	1.97259
LUX	3.31141
MDG	0.185779
MWI	0.215847
MYS	1.24549
MDV	0.706337
MLI	0.250223
MLT	1.78994
MHL	0.788682
MTQ	0.293812
MUS	0.901956
MEX	0.674103
MNG	0.707316
MNE	1.42463
MAR	0.929735
MOZ	0.455491
MMR	0.300534
NPL	0.602543
NLD	3.14744
NCL	1.64223
NZL	3.07522
NIC	0.67988
NER	0.235595
NGA	0.294556
MNP	1.16421
NOR	4
OMN	2.11487
PAK	0.686443
PLW	1.06953
PAN	1.13539
PNG	0.322504
PRY	1.1867
PER	0.632788
PHL	0.481601
POL	2.36422
PRT	1.88945
QAT	0.436704
KOR	2.6816
ROU	2.03336
RUS	0.59766
RWA	0.00865679
KNA	0.890739
VCT	0.922149
WSM	0.529539
SMR	2.81482
SAU	2.55707
SEN	0.33681
SRB	1.38792
SYC	0.921825
SLE	0.145483
SVK	1.42886
SVN	2.42663
SGP	3.5
SLB	0.267033
ZAF	0.746327
ESP	2.44145
LKA	0.240696
SDN	0.00228032
SUR	0.340576
CHE	4.44143
SYR	0.0231834
TJK	0.149562
TZA	0.274537
THA	0.985374
TLS	0.303659
TGO	0.284299
TTO	1.09376
TUN	0.617737
TUR	2.1554
TKM	0.732493
UGA	0.117999
UKR	0.890636
ARE	1.51259
GBR	3.15279
USA	1.51259
URY	0.934428
UZB	0.374593
VUT	0.541878
VNM	0.833511
ZMB	0.206745
ZWE	0.378966

## Sheet: ISO A3
Country	ISO A3
Aruba	ABW
Afghanistan	AFG
Angola	AGO
Anguilla	AIA
Albania	ALB
United Arab Emirates	ARE
Argentina	ARG
Armenia	ARM
Australia	AUS
Austria	AUT
Azerbaijan	AZE
Burundi	BDI
Belgium	BEL
Benin	BEN
Burkina Faso	BFA
Bangladesh	BGD
Bulgaria	BGR
Bahrain	BHR
Bosnia and Herzegovina	BIH
Saint Barthélemy	BLM
Belarus	BLR
Bolivia	BOL
Brazil	BRA
Barbados	BRB
Brunei Darussalam	BRN
Bouvet Island	BVT
Botswana	BWA
Central African Republic (the)	CAF
Canada	CAN
Switzerland	CHE
Chile	CHL
China	CHN
Côte d'Ivoire	CIV
Cameroon	CMR
Congo (the Democratic Republic of the)	COD
Congo (the)	COG
Cook Islands (the)	COK
Colombia	COL
Comoros (the)	COM
Costa Rica	CRI
Cuba	CUB
Curaçao	CUW
Christmas Island	CXR
Cyprus	CYP
Czechia	CZE
Germany	DEU
Djibouti	DJI
Denmark	DNK
Dominican	DOM
Algeria	DZA
Ecuador	ECU
Egypt	EGY
Western Sahara	ESH
Spain	ESP
Estonia	EST
Ethiopia	ETH
Finland	FIN
Fiji	FJI
France	FRA
Micronesia	FSM
Gabon	GAB
United Kingdom	GBR
Georgia	GEO
Ghana	GHA
Guinea	GIN
Gambia (the)	GMB
Equatorial Guinea	GNQ
Greece	GRC
Greenland	GRL
Guatemala	GTM
French Guiana	GUF
Honduras	HND
Croatia	HRV
Haiti	HTI
Hungary	HUN
Indonesia	IDN
India	IND
Ireland	IRL
Iran	IRN
Iraq	IRQ
Iceland	ISL
Israel	ISR
Italy	ITA
Jamaica	JAM
Jordan	JOR
Japan	JPN
Kazakhstan	KAZ
Kenya	KEN
Kyrgyzstan	KGZ
Cambodia	KHM
South Korea	KOR
Kuwait	KWT
Lao	LAO
Lebanon	LBN
Liberia	LBR
Sri Lanka	LKA
Lesotho	LSO
Lithuania	LTU
Luxembourg	LUX
Latvia	LVA
Morocco	MAR
Moldova	MDA
Madagascar	MDG
Maldives	MDV
Mexico	MEX
Republic of North Macedonia	MKD
Mali	MLI
Malta	MLT
Myanmar	MMR
Montenegro	MNE
Mongolia	MNG
Mozambique	MOZ
Mauritania	MRT
Mauritius	MUS
Malawi	MWI
Malaysia	MYS
Mayotte	MYT
Namibia	NAM
Niger (the)	NER
Norfolk Island	NFK
Nigeria	NGA
Nicaragua	NIC
Netherlands (the)	NLD
Norway	NOR
Nepal	NPL
New Zealand	NZL
Oman	OMN
Pakistan	PAK
Panama	PAN
Peru	PER
Philippines (the)	PHL
Papua New Guinea	PNG
Poland	POL
Puerto Rico	PRI
North Korea	PRK
Portugal	PRT
Paraguay	PRY
Qatar	QAT
Romania	ROU
Russian Federation (the)	RUS
Rwanda	RWA
Saudi Arabia	SAU
Sudan (the)	SDN
Senegal	SEN
Singapore	SGP
Svalbard and Jan Mayen	SJM
Sierra Leone	SLE
El Salvador	SLV
Serbia	SRB
Slovakia	SVK
Slovenia	SVN
Sweden	SWE
Eswatini	SWZ
Seychelles	SYC
Chad	TCD
Togo	TGO
Thailand	THA
Tajikistan	TJK
Tokelau	TKL
Turkmenistan	TKM
Trinidad and Tobago	TTO
Tunisia	TUN
Turkey	TUR
Tanzania, United Republic of	TZA
Uganda	UGA
Ukraine	UKR
Uruguay	URY
United States	USA
Uzbekistan	UZB
Venezuela	VEN
Viet Nam	VNM
Wallis and Futuna	WLF
South Africa	ZAF
Zambia	ZMB
Zimbabwe	ZWE
